# Supplementary material for: iNuc-PhysChem: A Sequence-Based Predictor for Identifying Nucleosomes via Physicochemical Properties
Source: PubMed Central journal article supplement (PMC3483203; doi:10.1371/journal.pone.0047843), 2012-10-29
Supplement: pone.0047843.s001.pdf [file pone.0047843.s001.pdf]

**Supporting Information S1.** The benchmark dataset  $\mathbb{S}$  consists of a positive dataset  $\mathbb{S}^+$  and a negative dataset  $\mathbb{S}^-$ . The positive dataset contains 5,000 nucleosome-forming DNA segments, while the negative dataset contains 5,000 nucleosome-inhibiting DNA segments. Each of these segments is 150-bp long.

**I. The positive dataset  $\mathbb{S}^+$**  contains the following 5,000 nucleosome-forming DNA sequences of 150-bp long

CCCCAGAACGAAGAAATCAGTGCCACGCCAACTCCAAATCCAGAAAGCAGCGCAGGTGCAGATGACACTTC  
CAGAGAAGCAAGTGCAAGTGCTGAAGGTGCTGAGGCCATTGAAGGCGACTTCATGTCTACTTTGAAGCAAT  
CGAAGAAG

AAGAAATCAGTGCCACGCCAACTCCAAATCCAGAAAGCAGCGCAGGTGCAGATGACACTTCAGAGAAGCA  
AGTGCAAGTGCTGAAGGTGCTGAGGCCATTGAAGGCGACTTCATGTCTACTTTGAAGCAATCGAAGAAGAA  
GCAAGAAA

CCATGAGATGTCAGGAATTGTTTTCCAAGGTTGGTCCTAAAGTGACAAAGGTGAAGGTTGGCGACCACGTGG  
TCGTTGATGCTGCCAGCAGTTGTGCGGACCTGCATTGCTGGCCACACTCCAAATTTTACAATTCCAAACCA  
TGTGATGC

TCAGGAATTGTTTTCCAAGGTTGGTCCTAAAGTGACAAAGGTGAAGGTTGGCGACCACGTGGTCGTTGATGC  
TGCCAGCAGTTGTGCGGACCTGCATTGCTGGCCACACTCCAAATTTTACAATTCCAAACCATGTGATGCTT  
GTCAGAGG

GCCATGGAACGACACTTTTTACCTCTACTTCTACCGAATTGACCACAGTCACCGGTACCAATGGTTTGCCAA  
CTGATGAGACCATCATTGTCTATCAGAACACCAACAACAGCCACTACTGCCATGACTACAACCTCAGCCATGG  
AACGACAC

CGTCAACCGGTACCAACGGCGTTCCAAGTACGAAACCGTCATTGTCTATCAGAACTCCAACCAGTGAAGGTC  
TAATCAGCACCACCCTGAACCATGGACTGGCACTTTCACTTCGACTTCCACTGAGGTTACCACCATCACT  
GGAACCAA

GTCCTGAAGATGACGAAGATGAATTGATGGACGACGTTATGGATGATTTGACTGGTTTTGTTGGACTCCGTT  
GACACAACCTGGTAAAGGTGTTGTGGTCCAAGCATCCACCTTGGGTTCTTTGGAAGCTTTGTTGGATTTCTT  
GAAAGACA

GTTTGAAGAACCATTCTTCATTGAGCCATTCAATGATCAGACTGACACGTTGCTCGAAATCCTGGATGAA  
GAAGCCAAGCAGTTCTTCACGAATCAGGTCACTGGCCTCTTGTGCTTCGATTCTCTCGTAACCAATCTGA  
TTAAGACG

AAATGACGCACGTCAACCGGTACCAACGGCGTTCCAAGTACGAAACCGTCATTGTCTATCAGAACTCCAACC  
AGTGAAGGTCTAATCAGCACCACCCTGAACCATGGACTGGCACTTTCACTTCGACTTCCACTGAGGTTAC  
CACCATCA

TAACAATCACGGTTTTCGTCAGTTGGTTGACCGTTAGTACCGGTGACGGTGGTCATCTCAGTGGATGTAGAG  
GTGAAAGTACCAGTCCATGGTTTCAAGTGGTGGTCTGATTAGACCTTCACTAGTTGGAGTTCTGATGACAA  
TACCGGTTT

GCCATGGAACGACACTTTTTACCTCTACATCCACTGAAATCACCACCGTCACCGGTACCAATGGTTTGCCAA  
CTGATGAGACCATCATTGTCTATCAGAACACCAACAACAGCCACTACTGCCATGACTACACCTCAGCCATGG  
AACGACAC

ATCACTTTATCGTGCATCTTGACCACGTTATTTCTGCTGGTGAACGAGTGGGGACAGTTCAATTCTGTGGT  
AACAAAGGCCACAATTGGTGGTGGACCGTGACCGACACGCAAAGCTGGAGCTTAATATGGATGTGACATTT  
CATCGATG

CCTCTACATCCACTGAAATCACCACCGTCACCGGTACCAATGGTTTGCCAACTGATGAGACCATCATTGTC  
ATCAGAACACCAACAACAGCCACTACTGCCATGACTACACCTCAGCCATGGAACGACACTTTTACCTCTAC  
ATCCACTG

TGACGAAGATGAATTGATGGACGACGTTATGGATGATTTGACTGGTTTGTGGACTCCGTTGACACAACCTG  
GTAAAGGTGTTGTGGTCCAAGCATCCACCTTGGGTTCTTTGGAAGCTTTGTTGGATTTCTTGAAAGACATG  
AAAATCCC

ATTGTCATCAGAACTCCAACCAGTGAAGGTCTAATCAGCACCACCACTGAACCATGGACTGGCACTTTTCAC  
TTCGACTTCCACTGAGGTTACCACCATCACTGGAACCAACGGTCAACCAACTGACGAAACTGTGATTGTTA  
TCAGAACT

GAATTGATGGACGACGTTATGGATGATTTGACTGGTTTGTGGACTCCGTTGACACAACCTGGTAAAGGTGT  
TGTGGTCCAAGCATCCACCTTGGGTTCTTTGGAAGCTTTGTTGGATTTCTTGAAAGACATGAAAATCCCTG  
TGATGTCT

CACTGAAATCACCACCGTCACCGGTACCAATGGTTTGCCAACTGATGAGACCATCATTGTCATCAGAACAC  
CAACAACAGCCACTACTGCCATGACTACACCTCAGCCATGGAACGACACTTTTACCTCTACATCCACTGAA  
ATGACCAC

ACTTCTACCGAATTGACCACAGTCACCGGTACCAATGGTTTGCCAACTGATGAGACCATCATTGTCATCAG  
AACACCAACAACAGCCACTACTGCCATGACTACAACCTCAGCCATGGAACGACACTTTTACCTCTACTTCTA  
CCGAATTG

CGCCACCTGGAGCACCACCAGCTTGGTACAACCTTAGACATGATTGGGTTGGCAATGTCTTGCAACTCCTTC  
AACTTGTCTATCGAATTCTTCTTGGCTGGCAGTGGTGTGCTGTCTAACCAAGAAATAGTCTCTTCAGCCTT  
CTTGGTGA

AATTGACCACAGTCACCGGTACCAATGGTTTGCCAACTGATGAGACCATCATTGTCATCAGAACACCAACA  
ACAGCCACTACTGCCATGACTACAACCTCAGCCATGGAACGACACTTTTACCTCTACTTCTACCGAATTGAC  
CACAGTCA

ACTTCTACCGAATTGACCACAGTCACCGGTACCAATGGTTTGCCAACTGATGAGACCATCATTGTCATCAG  
AACACCAACAACAGCCACTACTGCCATGACTACAACCTCAGCCATGGAACGACACTTTTACCTCTACATCCA  
CTGAAATC

CTTAAAGAATCTCAAGAGTTCCCAGAACCAATCTTCACCCCATCGACCAAGGCTGAACAAGGTGAACATGA  
CGAAAACATCTCTCTGCCCAGGCCGCTGAGCTGGTGGGTGAAGATTTGTCACGTAGAGTGGCAGAACTGG  
CTGTAAAA

ACCTCAAGGACTTAAAGAATCTCAAGAGTTCCCAGAACCAATCTTCACCCCATCGACCAAGGCTGAACAAG  
GTGAACATGACGAAAACATCTCTCTGCCCAGGCCGCTGAGCTGGTGGGTGAAGATTTGTCACGTAGAGTGG  
GCAGAACT

CCTCTACTTCTACCGAATTGACCACAGTCACCGGTACCAATGGTTTGCCAACTGATGAGACCATCATTGTC  
ATCAGAACACCAACAACAGCCACTACTGCCATGACTACAACCTCAGCCATGGAACGACACTTTTACCTCTAC  
TTCTACCG

TAGAATCCAGATACAAATCACAAGGTAACCTTAGAGTTTGAGCGAGAAGTAGTTTCAGCAGGGTGTAGCTCG  
TTCCTCAGCGGGTCTGTGGACAGGTCCATTGGAGACCCCTTCCACTCGATCTTGAGTGACTTGTACTGTCT  
TGTAGGAA

TACCGAATTGACCACAGTCACCGGTACCAATGGTTTGCCAACTGATGAGACCATCATTGTCATCAGAACAC  
CAACAACAGCCACTACTGCCATGACTACAACCTCAGCCATGGAACGACACTTTTACCTCTACTTCTACCGAA  
TTGACCAC

AATTGACCACAGTCACCGGTACCAATGGTTTGCCAACTGATGAGACCATCATTGTCATCAGAACACCAACA  
ACAGCCACTACTGCCATGACTACAACCTCAGCCATGGAACGACACTTTTACCTCTACATCCACTGAAATCAC  
CACCGTCA

ACACTGGCCACACCAGTTCTAGCCACATCAAAACCAATACCAGCACCACCACCGCTGCCGGATGAAGCACT  
GGTCAACAATTCTCTTCTCAGTTTGGCCAGCTTGGCCTTCAGTTGACCCAAATGGAAAGATGTGGCCTTGT  
TCTTTTGG

ACTGAGCCATGGAACAGCACTTTTACCTCTACTTCTACCGAATTGACCACAGTCACCGGTACCAATGGTTT  
GCCAACTGATGAGACCATCATTGTCATCAGAACACCAACAACAGCCACTACTGCCATGACTACAACCTCAGC  
CATGGAAC

ACTCAGCCATGGAACGACACTTTTACCTCTACTTCTACCGAATTGACCACAGTCACCGGTACCAATGGTTT  
GCCAACTGATGAGACCATCATTGTCATCAGAACACCAACAACAGCCACTACTGCCATGACTACAACCTCAGC  
CATGGAAC

ACATCTACTGAAATGACGCACGTCACCGGTACCAACGGCGTTCCAACCTGACGAAACCGTCATTGTCATCAG  
AACTCCAACCAGTGAAGGTCTAATCAGCACCACCCTGAACCATGGACTGGCACTTTCACTTCGACTTCCA  
CTGAGGTT

ATCACAATGTCTAGATTAGAAAGATTGACCTCATTAAACGTTGTTGCTGGTTCTGACTTGAGAAGAACCTC  
CATCATTGGTACCATCGGTCCAAAGACCAACAACCCAGAAACCTTGGTTGCTTTGAGAAAGGCTGGTTTGA  
ACATTGTC

GAACTCCAACCAGTGAAGGTCTAATCAGCACCACCCTGAACCATGGACTGGCACTTTCACTTCGACTTCC  
ACTGAGGTTACCACCATCACTGGAACCAACGGTCAACCAACTGACGAACTGTGATTGTTATCAGAACTCC  
AACCAGTG

ATGGGATCGTTATGAGATGACCTCGTGGTCATGGAGTCCCTGAGTGATGGTATGGACATCCCAGAATCCAT  
CGAGTTTGTGAACTCGCTGTCGTCATCACCAGTGTGTCATTATTGCGAAGATGCCTGCCACTAGGAA  
TCCATCGA

GGTGACGGTGGTCATCTCAGTGGATGTAGAGGTGAAAGTACCAGTCCATGGTTTCAGTGGTGGTGTGATTA  
GACCTTCACTAGTTGGAGTTCTGATGACAATGACGGTTTCGTCAGTTGGAACGCCGTTGGTACCGGTGACG  
GTGGTCAT

GCAACCGTTTCCCTCCAAGTCATACACCCTGTTACTGTTACTCACTGTGACAACAATGGCTGTAACACCAA  
GACTGTCACTTCTGAATGTTCTAAAGAACTGCAGCAACCACCTTTCTCCAAAATCATACTACTGTTA  
CCGTTACT

ACCAACGGCGTTCCAACCTGACGAAACCGTCATTGTCATCAGAACTCCAACCAGTGAAGGTCTAATCAGCAC  
CACCCTGAACCATGGACTGGCACTTTCACTTCGACTTCCACTGAGGTTACCACCATCACTGGAACCAACG  
GTCAACCA

GTTTGAAACAACCTCAAGGACTTAAAGAATCTCAAGAGTTCCAGAACCAATCTTACCCCATCGACCAAG  
GCTGAACAAGGTGAACATGACGAAAACATCTCTCTGCCAGGCCGCTGAGCTGGTGGGTGAAGATTTGTC  
ACGTAGAG

GGAGTTCTGATAACAATCACGGTTTCGTCAGTTGGTTGACCGTTAGTACCGGTGACGGTGGTCATCTCAGT  
GGATGTAGAGGTGAAAGTACCAGTCCATGGTTTCAGTGGTGGTGTGATTAGACCTTCACTAGTTGGAGTTC  
TGATGACA

GCCATGGAACAGCACTTTTACCTCTACTTCTACCGAATTGACCACAGTCACTGGCACCAATGGTGTACGAA  
CTGACGAAACCATCATTGTAATCAGAACACCAACAACAGCCACTACTGCCATAACTACAACCTGAGCCATGG  
AACAGCAC

CTACAACCTCAGCCATGGAACGACACTTTTTACCTCTACATCCACTGAAATCACCACCGTCACCGGTACCAAT  
GGTTTTGCCAACTGATGAGACCATCATTGTCATCAGAACACCAACAACAGCCACTACTGCCATGACTACACC  
TCAGCCAT

ATCTTCACCCCATCGACCAAGGCTGAACAAGGTGAACATGACGAAAACATCTCTCCTGCCAGGCCGCTGA  
GCTGGTGGGTGAAGATTTGTCACGTAGAGTGGCAGAAGTGGCTGTAAAACGTACTCCAAGTGCAAAGATT  
ATGCTAAG

CGAAACCGTCATTGTCATCAGAAGTCCAACAGTGAAGGTCTAATCAGCACCACCACTGAACCATGGACTG  
GCACTTTCACTTCGACTTCCACTGAGGTTACCACCATCACTGGAACCAACGGTCAACCAACTGACGAAACT  
GTGATTGT

CTCAAGAGTTCCAGAACCAATCTTCACCCCATCGACCAAGGCTGAACAAGGTGAACATGACGAAAACATC  
TCTCCTGCCAGGCCGCTGAGCTGGTGGGTGAAGATTTGTCACGTAGAGTGGCAGAAGTGGCTGTAAAAC  
GTACTCCA

CGTCACCGGTACCAACGGCGTTCCAACCTGACGAAACCGTCATTGTCATCAGAAGTCCAACCTAGTGAAGGTC  
TAATCAGCACCACCACTGAACCATGGACTGGTACTTTACCTCTACATCCACTGAGATGACCACCGTCACC  
GGTACTAA

GGAAGCACAGAAGCAAGAGGAGGCGCATCGATCGTGGCAGATGAGTCAGCAAACACCACAGGAAAGTGAAC  
AGACCACAGCGAAAGAACAGGACCTTGATCAAGAGAGCGTGTGAGCAACATTGACTTCAATACGGATTTG  
AATCACA

GAGGGTAGTTGACATGGAGTTAGAATTGGGTGAGTGTAGTGTAGTGTAGTATTAGGGTGTGGTGTGTG  
GGTGTGGTGTGGGTGTGGGTGTGGGTGTGGGTGTGGTGTGGTGTGGTGTGGTGTGGTGTGGTGTGGT  
GTGTGGTG

TGGCTTAATCAACTTCTTCAACGGTTGGACCTTCAGCCTCTGGAGCTGGAGGAGCACCACCTGGGAAACCG  
CCTGGAGCACCACCTGCAGCGCCACCTGGAGCACCACCAGCTTGGTACAACCTTAGACATGATTGGGTTGGC  
AATGTCTT

TTTCACTTCTACATCTACTGAAATGACGCAGTCCACGGTACCAACGGCGTTCCAACCTGACGAAACCGTCA  
TTGTCATCAGAAGTCCAACAGTGAAGGTCTAATCAGCACCACCACTGAACCATGGACTGGCACTTTCACT  
TCGACTTC

ATTGAGCCATTCAATGATCAGACTGACACGTTGCTCGAAATCCTGGATGAAGAAGCCAAGCAGTTCTTAC  
GAATCAGGTCACTGGCCTCTTGTGCTTCGATTCTCTCGTAACCAATCTGATTAAGACGTGTAACCATGAC  
GAGGAGTC

TTCCAACCTGACGAAACCGTCATTGTCATCAGAAGTCCAACAGTGAAGGTCTAATCAGCACCACCACTGAA  
CCATGGACTGGCACTTTCACTTCGACTTCCACTGAGGTTACCACCATCACTGGAACCAACGGTCAACCAAC  
TGACGAAA

TCATTAACGTTGTTGCTGGTTCTGACTTGAGAAGAACCTCCATCATTGGTACCATCGGTCCAAAGACCAA  
CAACCCAGAAACCTTGGTTGCTTTGAGAAAGGCTGGTTTGAACATTGTCCGTATGAACTTCTCTCACGGTT  
CTTACGAA

TGCCACGCCAACTCCAAATCCAGAAAGCAGCGCAGGTGCAGATGACACTTCCAGAGAAGCAAGTGCAAGTG  
CTGAAGGTGCTGAGGCCATTGAAGGCGACTTCATGTCTACTTTGAAGCAATCGAAGAAGAAGCAAGAAAAG  
AAGGTTAT

AGCACCACAGCTTGGTACAACCTTAGACATGATTGGGTTGGCAATGTCTTGCAACTCCTTCAACTTGTGAT  
CGAATTTCTTCTTGGTGGCAGTGGTGTGCTGCTAACCAAGAAATAGTCTCTTCAGCCTTCTTGGTGACG  
GTGTCCTT

CAGTGAAGGTCTAATCAGCACCACCCTGAACCATGGACTGGCACTTTCACTTCGACTTCCACTGAGGTTA  
CCACCATCACTGGAACCAACGGTCAACCAACTGACGAACTGTGATTGTTATCAGAACTCCAACCAGTGAA  
GGTCTAAT

CGTGCATCTTGACCACGTTATTTCTGCTGGTGAACGAGTGGGGACAGTTCAATTCTGTGGTAACAAGGCCA  
CAATTGGTGGTGGACCGTGACCGACACGCAAAGCTGGAGCTTAATATGGATGTGACATTTCCATCGATGCC  
ATGTGACC

ACATCTACTGAAATGACCACCATTACTGGAACCAACGGCGTTCCAAGTACGAAACCGTCATTGTATCAG  
AACTCCAACCAGTGAAGGTCTAATCAGCACCACCCTGAACCATGGACTGGTACTTTTACTTCTACATCTA  
CTGAAATG

CCTTGCTGGCAGTGGTGTGCTGTCTAACCAAGAAATAGTCTCTTCAGCCTTCTTGGTGACGGTGTCTTG  
TCAGCTTGTTCGAATTTGTACCAGCTTCAGAAATGGTGTCTTCAAAGAGTAAGCAATGGATTCCAATTG  
GTTCTTGG

ACCATTCTTCATTGAGCCATTCAATGATCAGACTGACACGTTGCTCGAAATCCTGGATGAAGAAGCCAAGC  
AGTTCTTCACGAATCAGGTCCTGGCCTCTTGTGCTTCGATTCTCTCGTAACCAATCTGATTAAGACGTG  
TAACCATG

CTAGATTAGAAAGATTGACCTCATTAAACGTTGTTGCTGGTTCTGACTTGAGAAGAACCTCCATCATTGGT  
ACCATCGGTCCAAGACCAACAACCCAGAAACCTTGGTTGCTTTGAGAAAGGCTGGTTTGAACATTGTCCG  
TATGAACT

CGTTAGTACCGGTGACGGTGGTCATCTCAGTGGATGTAGAGGTGAAAGTACCAGTCCATGGTTCAGTGGTG  
GTGCTGATTAGACCTTCACTAGTTGGAGTTCTGATGACAATGACGGTTTCGTCAGTTGGAACGCCGTTGGT  
ACCGGTGA

AAGATTGACCTCATTAAACGTTGTTGCTGGTTCTGACTTGAGAAGAACCTCCATCATTGGTACCATCGGTC  
CAAAGACCAACAACCCAGAAACCTTGGTTGCTTTGAGAAAGGCTGGTTTGAACATTGTCCGTATGAACTT  
TCTCACGG

GACAAACCCACACTGGCCACACCAGTTCTAGCCACATCAAACCAATACCAGCACCACCACCGCTGCCGG  
ATGAAGCACTGGTCAACAATTCTTCTCAGTTTGGCCAGCTTGGCCTTCAGTTGACCCAAATGGAAAGAT  
GTGGCCTT

GCAATGTCTTGCAACTCCTTCAACTTGTATCGAATTCTTCTTGGCTGGCAGTGGTGTGCTGTCTAACCA  
AGAAATAGTCTCTTCAGCCTTCTTGGTGACGGTGTCTTGTGACGCTTGTTCGAATTTGTACCAGCTTCA  
GAATGGTG

GGTTTCGTCAGTTGGTTGACCGTTAGTACCGGTGACGGTGGTCATCTCAGTGGATGTAGAGGTGAAAGTAC  
CAGTCCATGGTTCAGTGGTGGTGTGCTGATTAGACCTTCACTAGTTGGAGTTCTGATGACAATGACGGTTTC  
TCAGTTGG

GTTGGTTGACCGTTAGTACCGGTGACGGTGGTCATCTCAGTGGATGTAGAGGTGAAAGTACCAGTCCATGG  
TTCAGTGGTGGTGTGCTGATTAGACCTTCACTAGTTGGAGTTCTGATGACAATGACGGTTTCGTCAGTTGAA  
CGCCGTTG

TTGTAGAAGAAATGACAGGGGAAGAAATGAATGAAGAAGAAATGACTGGAGAAGAAGTACTAGAGAAGAA  
GTGACTGAGGAAGAAATGACTAGAGAAGAAGTGTCTGAGGAAGAAATTAAGGAGGAAATCACAGAAGT  
TCCATTGC

AAATGACCACCATTACTGGAACCAACGGCGTTCCAAGTACGAAACCGTCATTGTATCAGAACTCCAACC  
AGTGAAGGTCTAATCAGCACCACCCTGAACCATGGACTGGTACTTTTACTTCTACATCTACTGAAATGAC  
CACCATTA

CTCTCGGTGACTCTTACACCAATAGCACCTCCTCCGCAGACTTGAGTTCTATCACTTCCGTCTCGTCAGCT  
AGTGCAAGTGCCACCGCTTCCGACTCACTTTCTTCCAGTGACGGTACCGTTTATTTGCCATCCACAACAAT  
TAGCGGTG

TACAAGGGAAGGAAGCACAGAAGCAAGAGGAGGCGCATCGATCGTGGCAGATGAGTCAGCAAACACCACAG  
GAAAGTGAACAGACCACAGCGAAAGAACAGGACCTTGATCAAGAGAGCGTGTGAGCAACATTGACTTCAA  
TACGGATT

ATACAAATCACAAGGTAACCTTAGAGTTTGGAGCGAGAAGTACTGTTGAGCAGGGTGTAGCTCGTTCCTCAGCG  
GGTCTGTGGACAGGTCCATTGGAGACCCCTTCCACTCGATCTTGAGTGACTTGTTACTGTCTGTAGGAAGC  
GTAGATAA

GAGATGGCAGTAGTTGGAGTTTTGACAATAATGACAGTTTCATCAGTTGGTTGACCGTTGGTTCCAGTGAT  
GGTGGTCACTCTCAGTAGATGTAGAGGTGAAAGTACCGGTCCATGGCTCGGTTGTAGTTGTAACCAAACCTT  
CACTGGTT

AAAACCAACAAGGTGTTAACTTTCGACGAAATCTTGAAGGTCAGTACCGGTGTTATGGTTGCCAGAGGT  
GACTTGGGTATTGAAATCCAGCCCCAGAAGTCTTGGCTGTCCAAAAGAAATTGATTGCTAAGTCTAACTT  
GGCTGGTA

GCCATGGAACGACACTTTTACCTCTACATCCACTGAAATCACCACCGTCACCGGTACCACCGGTTTGCCAA  
CTGATGAGACCATCATTGTCATCAGAACACCAACAACAGCCACTACTGCCATGACTACAACCTCAGCCATGG  
AACGACAC

TTTTACCTCTACTTCTACCGAATTGACCACAGTCACCGGTACCAATGGTTTGCCAACTGATGAGACCATCA  
TTGTCATCAGAACACCAACAACAGCCACTACTGCCATGACTACAACCTCAGCCATGGAACGACACTTTTACC  
TCTACTTC

TTTTACCTCTACTTCTACCGAATTGACCACAGTCACCGGTACCAATGGTTTGCCAACTGATGAGACCATCA  
TTGTCATCAGAACACCAACAACAGCCACTACTGCCATGACTACAACCTCAGCCATGGAACGACACTTTTACC  
TCTACATC

ACCATGGACTGGCACTTTCCTTCCACTGAGGTTACCACCATCACTGGAACCAACGGTCAACCAA  
CTGACGAAACTGTGATTGTTATCAGAACTCCAACCAGTGAAGGTCTAATCAGCACCACCACTGAACCATGG  
ACTGGTAC

ACTGTGCATGGTTTGAAACAACCTCAAGGACTTAAAGAATCTCAAGAGTTCCCAGAACCAATCTTACCCC  
ATCGACCAAGGCTGAACAAGGTGAACATGACGAAAACATCTCTCCTGCCAGGCCGCTGAGCTGGTGGGTG  
AAGATTTG

ACGGAACCATGGACCGGTACTTTCACTTCTACATCTACTGAAATGACCACCGTCACCGGTACCAACGGCGT  
TCCAACCTGACGAAACCGTCATTGTCATCAGAACTCCAACAACCTGCTAGCACCATCATAACTACAACCTGAGC  
CATGGAAC

CCCAGAACCAATCTTACCCCATCGACCAAGGCTGAACAAGGTGAACATGACGAAAACATCTCTCCTGCC  
AGGCCGCTGAGCTGGTGGGTGAAGATTTGTCACGTAGAGTGGCAGAACTGGCTGTAAAACCTGTACTCCAAG  
TGCAAAGA

ACATCCACTGAAATGACCACCGTCACCGGTACCAACGGCGTTCCAACCTGACGAAACCGTCATTGTCATCAG  
AACTCCAACCTAGTGAAGGTCTAATCAGCACCACCACTGAACCATGGACTGGTACTTTACCTCTACATCCA  
CTGAGATG

TTCTGACTTGAGAAGAACCCTCCATCATTGGTACCATCGGTCCAAAGACCAACAACCCAGAAACCTTGGTTG  
CTTTGAGAAAGGCTGGTTTGAACATTGTCCGTATGAACTTCTCTCACGGTTCTTACGAATACCACAAGTCT  
GTCATTGA

CTGTTCCATGGCTCAGTTGTAGTTATGATGGTGCTAGCAGTTGTTGGAGTTCTGATGACAATGACGGTTTC  
GTCAGTTGGAACGCCGTTGGTACCGGTGACGGTGGTCATTTTCAGTAGATGTAGAAGTGAAAGTACCGGTCC  
ATGGTTCC

ACGCTGTGGTTCCCACCGCACGCTATCTTCCTGACTATTGCTCCATCATCTCCTGGCACAGACCTCTGTGG  
GGTATCCATATCCTCATCGTGCCCCAGTCCCAGTTGCCTTTGCCATTAGACCCAAACGCATACACACAAC  
TCATCGAT

ACGGAACCATGGACCGGTACTTTCACTTCTACATCTACTGAAATGACGCACGTACCCGGTACCAACGGCGT  
TCCAACCTGACGAAACCGTCATTGTCATCAGAACTCCAACAGTGAAGGTCTAATCAGCACCACCACTGAAC  
CATGGACT

GGAACAGCACTTTTACCTCTACTTCTACCGAATTGACCACAGTCACCCGGTACCAATGGTTTGCCTAACTGAT  
GAGACCATCATTGTCATCAGAACACCAACAACAGCCACTACTGCCATGACTACAACCTCAGCCATGGAACGA  
CACTTTTA

GGAACGACACTTTTACCTCTACTTCTACCGAATTGACCACAGTCACCCGGTACCAATGGTTTGCCTAACTGAT  
GAGACCATCATTGTCATCAGAACACCAACAACAGCCACTACTGCCATGACTACAACCTCAGCCATGGAACGA  
CACTTTTA

AAGCAAGAGGAGGCGCATCGATCGTGGCAGATGAGTCAGCAAACACCACAGGAAAGTGAACAGACCACAGC  
GAAAGAACAGGACCTTGATCAAGAGAGCGTGTGGAGCAACATTGACTTCAATACGGATTTGAATCACAATT  
TGAATTTA

CTAGTTGTCGGTCCTGAAGATGACGAAGATGAATTGATGGACGACGTTATGGATGATTTGACTGGTTTGT  
GGACTCCGTTGACACAACCTGGTAAAGGTGTTGTGGTCCAAGCATCCACCTTGGGTTCTTTGGAAGCTTTGT  
TGGATTTT

TTAGAGTTTGAGCGAGAAGTACTAGTTTCAGCAGGGTGTAGCTCGTTCCCTCAGCGGGTCTGTGGACAGGTCCATT  
GGAGACCCCTTCCACTCGATCTTGAGTGACTTGTACTGTCTGTAGGAAGCGTAGATAAGGGCGGAGAGTA  
ATCTGGTA

TTCCTGTTGGAGTTCTGATAACAATCACGGTTTCGTCAGTTGGTTGACCGTTAGTACCGGTGACGGTGG  
TCATCTCAGTGGATGTAGAGGTGAAAGTACCAGTCCATGGTTTCAGTGGTGGTGCTGATTAGACCTTACTA  
GTTGGAGT

TTGGTTACAACCACCACTGAACCATGGACTGGTACTTTTACTTTCGACTTCCACTGAAATGTCTACTGTAC  
TGGAACCAATGGCTTGCCTAACTGATGAAACTGTCATTGTTGTCAAACTCCAACCTACTGCCATCTCATCCA  
GTTTGTCA

CGAAACCGTCATTGTCATCAGAACTCCAACCTAGTGAAGGTCTAATCAGCACCACCACTGAACCATGGACTG  
GTACTTTTACCTCTACATCCACTGAGATGACCACCGTCACCCGGTACTAACGGTCAACCAACTGACGAAAC  
GTGATTGT

ACTGCCATGACTACAACCTCAGCCATGGAACGACACTTTTACCTCTACATCCACTGAAATCACCACCGTCAC  
CGGTACCAATGGTTTGCCTAACTGATGAGACCATCATTGTCATCAGAACACCAACAACAGCCACTACTGCCA  
TGACTACA

AACTCCACTACAGCATCTGGTTCAATCGCTTCTACTGCTTCCACCGCTTCCACTACTTCTACTGCATCCGC  
TGCATCCGCCACCAGCTTACCTCAGGTTCCGCTTCTGTCTACACTACTACATTAACCTACTTGAATGCCA  
CAAGTACA

GGTTGTTGTAGAAGAAATGACAGGGGAAGAAATGAATGAAGAAGAAATGACTGGAGAAGAAGTACTAGAG  
AAGAAGTACTGAGGAAGAAATGACTAGAGAAGAAGTGTCTGAGGAAGAAATTAAGGAGGAAATCACA  
GAAGTTCC

CCACCTGCAGCGCCACCTGGAGCACCACCAGCTTGGTACAACCTTAGACATGATTGGGTTGGCAATGTCTTG  
CAACTCCTTCAACTTGTATCGAATTCTTCTTGGCTGGCAGTGGTGGTGTCTAATCAAGAAATAGTCT  
CTTCAGCC

AAATGACCACCGTCACCGGTACCAACGGCGTTCCAACCTGACGAAACCGTCATTGTATCAGAACTCCAAC  
AGTGAAGGTCTAATCAGCACCACCCTGAACCATGGACTGGTACTTTACCTCTACATCCACTGAGATGAC  
CACCGTCA

GACACTTTTACCTCTACTTCTACCGAATTGACCACAGTCACCGGTACCAATGGTTTGCCAACTGATGAGAC  
CATCATTGTATCAGAACACCAACAACAGCCACTACTGCCATGACTACAACCTCAGCCATGGAACGACACTT  
TTACCTCT

ATCTCCACATCCTACCAGATTCCCGTCATTTGTATCAGCATCACGCTGTGGTTCCACCGCACGCTATCTTCC  
TGACTATTGCTCCATCATCTCCTGGCACAGACCTCTGTGGGGTATCCATATCCTCATCGTGCCCCAGTCCC  
AGTTGCCT

ACCACCGTCACCGGTACCAATGGTTTGCCAACTGATGAGACCATCATTGTATCAGAACACCAACAACAGC  
CACTACTGCCATGACTACACCTCAGCCATGGAACGACACTTTTACCTCTACATCCACTGAAATGACCACCG  
TCACCGGT

GCCTGTGTGGGTACGGCCATTCTGTGGTGAATGTGACTGAGCAGTTTGAGGAGAGGCATGATGGGGGT  
TCTCTGGAACAGCTGATGAAGCAGGTGTTGTTGTCTGTTGAGAGTTAGCCTTAGTGGAAGCCTTCTCACAT  
TCTTCTGT

CTTCGACTTCCACTGAAATGTCTACTGTCACTGGAACCAATGGCTTGCCAACTGATGAAACTGTCTATTGTT  
GTCAAAACTCCAACCTACTGCCATCTCATCCAGTTTGTATCATCATCTTTCAGGACAAATCACCAGCTCTAT  
CACGTCTT

AGTCACCGGTACCAATGGTTTGCCAACTGATGAGACCATCATTGTATCAGAACACCAACAACAGCCACTA  
CTGCCATGACTACAACCTCAGCCATGGAACGACACTTTTACCTCTACTTCTACCGAATTGACCACAGTCACC  
GGTACCAA

GACACTTTTACCTCTACATCCACTGAAATCACCACCGTCACCGGTACCAATGGTTTGCCAACTGATGAGAC  
CATCATTGTATCAGAACACCAACAACAGCCACTACTGCCATGACTACACCTCAGCCATGGAACGACACTT  
TTACCTCT

CAAGGTAACCTTAGAGTTTGAGCGAGAAGTAGTTTACAGCAGGGTGTAGCTCGTTCTCAGCGGGTCTGTGGA  
CAGGTCCATTGGAGACCCCTTCCACTCGATCTTGAAGTACTTGTACTGTCTGTAGGAAGCGTAGATAAGG  
GCGGAGAG

GGGACAGTTCAATTCTGTGGTAACAAGGCCACAATTGGTGGTGGACCGTGACCGACACGCAAAGCTGGAGC  
TTAATATGGATGTGACATTTCCATCGATGCCATGTGACCTGGTGAATCTCGATATTATGGACGACTCTGGA  
GAGATGCA

ATTGAATCTTGAATGAAGAGGTGACTACTGTTTTCGTCTCAGCAGCTCCAGTACTGGTAGTTGTCTCAG  
CAGCTCCAGTATTGGTTGTTGTCTACTGGTAGCACTGTTTACTTTTAGAGCTGACAGACTGTTTACTTCGTA  
GTCTGTGG

AGCAGCTCCAGTACTGGTAGTTGTCTCAGCAGCTCCAGTATTGGTTGTTGTCTCACTGGTAGCACTGTTCA  
TTTTAGAGCTGACAGACTCTTCATTCGTAGTCTGTGGCCTCCATGTTGGATAGACCGTAACAACATCATT  
ACAGTAGC

CCACCACTGAACCATGGACTGGTACTTTTACTTTCGACTTCCACTGAAATGTCTACTGTCACTGGAACCAAT  
GGCTTGCCAACTGATGAAACTGTCTATTGTTGTCAAAACTCCAACCTACTGCCATCTCATCCAGTTTGTATC  
ATCATCTT



AGTCACCGGTACCAATGGTTTTGCCAACTGATGAGACCATCATTGTCATCAGAACACCAACAACAGCCACTA  
CTGCCATGACTACAACCTCAGCCATGGAACGACACTTTTACCTCTACATCCACTGAAATCACCACCGTCACC  
GGTACCAA

TAGTTGGAGTTTTGACAATAATGACAGTTTCATCAGTTGGTTGACCGTTGGTTCCAGTGATGGTGGTCATC  
TCAGTAGATGTAGAGGTGAAAGTACCGGTCCATGGCTCGGTTGTAGTTGTAACCAAACCTTCACTGGTTGG  
AGTTCTGA

TTTCCAAGGTTGGTCCTAAAGTGACAAAGGTGAAGGTTGGCGACCACGTGGTCGTTGATGCTGCCAGCAGT  
TGTGCGGACCTGCATTGCTGGCCACACTCCAAATTTTACAATTCCAAACCATGTGATGCTTGTGAGAGGGG  
CAGTGAAA

GTCATCTCAGTGGATGTAGAGGTGAAAGTACCAGTCCATGGTTTCAGTGGTGGTGTGATTAGACCTTCACT  
AGTTGGAGTTCTGATGACAATGACGGTTTTCGTCAGTTGGAACGCCGTTGGTACCGGTGACGGTGGTCATTT  
CAGTGGAT

GACAGAAGTACGAGCTTTCATGCATCAACACAGAAACAATCGCTACCAGGACATTCATTCACCAGGACTTC  
CACAAGAAGGTACCCGACCTGCGAGCCAGGCTGCTGAACAGAACCACGCAGACCTGGTACGATATCAACAA  
GGAGCGCC

CCTCGTGGTCATGGAGTCCCTGAGTGATGGTATGGACATCCAGAATCCATCGAGTTTGTGAACTCGCTGT  
CGTCATCATCACCAGTGTTCATTATTGCGAAGATGCCTGCCACTAGGAATCCATCGACGTACCATGGCT  
ATAACTTT

ACTCCAAATCCAGAAAGCAGCGCAGGTGCAGATGACACTTCCAGAGAAGCAAGTGCAAGTGCTGAAGGTGC  
TGAGGCCATTGAAGGCGACTTCATGTCTACTTTGAAGCAATCGAAGAAGAAGCAAGAAAAGAAGGTTATTG  
AAGAGAAG

TGAGACCATCATTGTCATCAGAACACCAACAACAGCCACTACTGCCATGACTACAACCTCAGCCATGGAACG  
ACACTTTTACCTCTACATCCACTGAAATCACCACCGTCACCGGTACCAATGGTTTTGCCAACTGATGAGACC  
ATCATTGT

AAATAAGTGTCTAGATACCTATCATGATTTTTCCAAATAGTTCTTGCAAATGATGGCCATGCAGCTTTGAC  
GGCAAGGACACCCCTCTGCGTGGCTGGTGTAAAGTTCTTCACCAGTGTAGGGTCAAGAACAACCTGCATCAA  
TACCGAAG

AACGGCAAAGTACAAGGGAAGGAAGCACAGAAGCAAGAGGAGGCGCATCGATCGTGGCAGATGAGTCAGCA  
AACACCACAGGAAAGTGAACAGACCACAGCGAAAGAACAGGACCTTGATCAAGAGAGCGTGTGAGCAACA  
TTGACTTC

TAACCAAACCTTCACTGGTTGGAGTTCTGATAACAATCACGGTTTTCGTCAGTTGGTTGACCGTTAGTACCG  
GTGACGGTGGTCATCTCAGTGGATGTAGAGGTGAAAGTACCAGTCCATGGTTTCAGTGGTGGTGTGCTGATTAG  
ACCTTAC

AACCTTCTCTTAGAATCCAGATACAAATCACAAGGTAACCTTAGAGTTTGAGCGAGAAGTAGTTTCAGCAGG  
GTGTAGCTCGTTCCCTCAGCGGGTCTGTGGACAGGTCCATTGGAGACCCCTTCCACTCGATCTTGAGTGACT  
TGTTACTG

ACTACCTCATGAATTCTAGTGGATGAAAGAAGCAGCACGAACACCATTTCTACAGACAACGACACATGGAA  
AGGTTACCATTCCCAAAGAAAACAACGATGGCCACAAGGTTGTGGTCCTCCATTCTCCTACTGTTGGAAG  
GAGATATT

TTGTCTCTAGTTTTGCGATAGTGTAGATACCGTCCTTGGATAGAGCACTGGAGATGGCTGGCTTTAATCTGC  
TGGAGTACCATGGAACACCGGTGATCATTCTGGTCACTTGGTCTGGAGCAATACCGGTCAACATGGTGGTG  
AAGTCACC

CTACAACCTCAGCCATGGAACGACACTTTTTACCTCTACTTCTACCGAATTGACCACAGTCACCGGTACCAAT  
GGTTTGCCAACCTGATGAGACCATCATTGTCATCAGAACACCAACAACAGCCACTACTGCCATGACTACAAC  
TCAGCCAT

TGGTGTCTCAAACCTCCACTACAGCATCTGGTTCAATCGCTTCTACTGCTTCCACCGCTTCCACTACTTCTA  
CTGCATCCGCTGCATCCGCCACCAGCTTACCTCAGGTTCCGCTTCTGTCTACACTACTACATTAACCTTAC  
TTGAATGC

ACCACAGTCACCGGTACCAATGGTTTGCCAACCTGATGAGACCATCATTGTCATCAGAACACCAACAACAGC  
CACTACTGCCATGACTACAACCTCAGCCATGGAACGACACTTTTTACCTCTACTTCTACCGAATTGACCACAG  
TCACCGGT

CATCGACCAAGGCTGAACAAGGTGAACATGACGAAAACATCTCTCCTGCCAGGCCGCTGAGCTGGTGGGT  
GAAGATTTGTCACGTAGAGTGGCAGAACTGGCTGTAAAACCTGTACTCCAAGTGCAAAGATTATGCTAAGGA  
GAAGGGCA

CATAACTACAACCTGAGCCATGGAACAGCACTTTTTACCTCTACTTCTACCGAATTGACCACAGTCACCGGTA  
CCAATGGTTTGCCAACCTGATGAGACCATCATTGTCATCAGAACACCAACAACAGCCACTACTGCCATGACT  
ACAACCTCA

CATGACTACAACCTCAGCCATGGAACGACACTTTTTACCTCTACTTCTACCGAATTGACCACAGTCACCGGTA  
CCAATGGTTTGCCAACCTGATGAGACCATCATTGTCATCAGAACACCAACAACAGCCACTACTGCCATGACT  
ACAACCTCA

GGTACTTTTTACTTCGACTTCCACTGAAATGTCTACTGTCACTGGAACCAATGGCTTGCCAACCTGATGAAAC  
TGTCATTGTTGTCAAAAACCTCAACTACTGCCATCTCATCCAGTTTGTTCATCATCATCTTCAGGACAAATCA  
CCAGCTCT

AGGTGACTACTGTTTTCGTCTCAGCAGCTCCAGTACTGGTAGTTGTCTCAGCAGCTCCAGTATTGGTTGTT  
GTCTCACTGGTAGCACTGTTTCATTTTAGAGCTGACAGACTGTTTCATTCGTAGTCTGTGGCCTCCATGTAGA  
ATAGACCG

TAATAAACTCATAACAGTGCAACGGCAAAGTACAAGGGAAGGAAGCACAGAAGCAAGAGGAGGCGCATCGA  
TCGTGGCAGATGAGTCAGCAAACACCACAGGAAAGTGAACAGACCACAGCGAAAGAACAGGACCTTGATCA  
AGAGAGCG

ACCAATGGTTTGCCAACCTGATGAGACCATCATTGTCATCAGAACACCAACAACAGCCACTACTGCCATGAC  
TACAACCTCAGCCATGGAACGACACTTTTTACCTCTACATCCACTGAAATCACCACCGTCACCGGTACCAATG  
GTTTGCCA

CATGACTACAACCTCAGCCATGGAACGACACTTTTTACCTCTACATCCACTGAAATGACCACCGTCACCGGTA  
CCAACGGCGTTCCAACCTGACGAAACCGTCATTGTCATCAGAACCTCAACTAGTGAAGGTCTAATCAGCACC  
ACCACTGA

TGGCAATGGGCCATGAGATGTCAGGAATTGTTTCCAAGGTTGGTCCTAAAGTGACAAAGGTGAAGGTTGGC  
GACCACGTGGTCGTTGATGCTGCCAGCAGTTGTGCGGACCTGCATTGCTGGCCACACTCCAAATTTTACAA  
TTCCAAC

GTGTGGTGATGGATAGTGAGTGGATAGTGAGTGGATGGATGGTGGAGTGGGGGAATGAGACAGGGCATGGG  
GTGGTGAGGTAAGTGCCGTGGATTGTGATGATGGAGAGGGAGGGTAGTTGACATGGAGTTAGAATTGGGTC  
AGTGTTAG

TCATATCAGAGTCCGCTGAGGATGAATCAGTAAATGTATTACCTGACTCAGGTGATGGAGTGCTCAGAGGC  
GTTCCAACCTGATGATGGATACTGCGGAAACTGTGATTGTGGCCAGGTGGAAAGTACATAGGCGCATTG  
ATAAGGTG

CTGAAAAGGACAAGGAAGATTTGAGATTCGGTGTCAAGAACGGTGTCCACATGGTCTTCGCTTCTTTTCATC  
AGAACCGCCAACGATGTTTTGACCATCAGAGAAGTCTTGGGTGAACAAGGTAAGGACGTCAAGATCATTGT  
CAAGATTG

CAAACCTGGATGAGATGGCAGTAGTTGGAGTTTTGACAATAATGACAGTTTCATCAGTTGGTTGACCGTTGG  
TTCCAGTGATGGTGGTCATCTCAGTAGATGTAGAGGTGAAAGTACCGGTCCATGGCTCGGTTGTAGTTGTA  
ACCAAACC

TGTCAGCATCACGCTGTGGTTCCACCGCACGCTATCTTCCTGACTATTGCTCCATCATCTCCTGGCACAG  
ACCTCTGTGGGGTATCCATATCCTCATCGTGCCCCAGTCCCAGTTGCCTTTGCCATTAGACCCAAACGCA  
TACACACA

ACTGAACCATGGACTGGTACTTTTTACTTCTACATCTACTGAAATGACCACCATTACTGGAACCAACGGCGT  
TCCAACCTGACGAAACCGTCATTGTCATCAGAACTCCAACCGTGAAGGTCTAATCAGCACCACCCTGAAC  
CATGGACT

CACTGAGGTTACCACCATCACTGGAACCAACGGTCAACCAACTGACGAAACTGTGATTGTTATCAGAACTC  
CAACCGTGAAGGTCTAATCAGCACCACCCTGAACCATGGACTGGTACTTTCACTTCTACATCTACTGAA  
ATGACCAC

ATTGTCATCAGAACTCCAACAACCTGCTAGCACCATCATAACTACAACCTGAGCCATGGAACAGCACTTTTAC  
CTCTACTTCTACCGAATTGACCACAGTCACTGGCACCAATGGTGTACGAACTGACGAAACCATCATTGTAA  
TCAGAACA

ATTTGTCCTGAAGAAGATGACAAACTGGATGAGATGGCAGTAGTTGGAGTTTTGACAATAATGACAGTTTC  
ATCAGTTGGTTGACCGTTGGTTCCAGTGATGGTGGTCATCTCAGTAGATGTAGAGGTGAAAGTACCGGTCC  
ATGGCTCG

CACCTTCTTGTCCCATATATCTCCAATCCATTGAACTTCGGTGCAGACATCGTTGTCCACTCCGCTACAA  
AGTACATCAACGGTCACTCAGACGTTGTGCTCGGTGTCTGGCCACTAATAACAAGCCATTGTACGAGCGT  
CTGCAGTT

CAGGGGAAGAAATGAATGAAGAAGAAATGACTGGAGAAGAAGTACTAGAGAAGAAGTACTGAGGAAGAA  
ATGACTAGAGAAGAAGTGTCTGAGGAAGAAATTACTGAGGAGGAAATCACAGAAGTTCATTGCTAGGATA  
GAATGGGG

GCAACTCCTTCAACTTGTTCATCGAATTCTTCCTTGCTGGCAGTGGTGTGCTGTCTAACCAAGAAATAGTC  
TCTTCAGCCTTCTTGGTGACGGTGTCTTGTGCTGCTGCTGCTGCTGCTGCTGCTGCTGCTGCTGCTGCT  
CTTCAAAG

CCGGTACCAATGGTTTTGCCAACTGATGAGACCATCATTGTCATCAGAACACCAACAACAGCCACTACTGCC  
ATGACTACACCTCAGCCATGGAACGACACTTTTTACCTCTACATCCACTGAAATGACCACCGTCAACGGTAC  
CAACGGTT

CTTCGACTTCCACTGAGGTTACCACCATCACTGGAACCAACGGTCAACCAACTGACGAAACTGTGATTGTT  
ATCAGAACTCCAACCGTGAAGGTCTAATCAGCACCACCCTGAACCATGGACTGGTACTTTCACTTCTAC  
ATCTACTG

CGTTCATCAGAGCAGGCTTGATGGGATCGTTATGAGATGACCTCGTGGTTCATGGAGTCCCTGAGTGATGGT  
ATGGACATCCCAGAATCCATCGAGTTTTGTGAACTCGCTGTGTCATCATCACCAGTGTGTCATTATTGGC  
AAGATGCC

CTACAACCTCAGCCATGGAACGACACTTTTTACCTCTACATCCACTGAAATCACCACCGTCAACGGTACCACC  
GGTTTTGCCAACTGATGAGACCATCATTGTCATCAGAACACCAACAACAGCCACTACTGCCATGACTACAAC  
TCAGCCAT

CCCGTCTGTTATCTCCACATCCTACCAGATTCCCGTCATTTGTCAGCATCACGCTGTGGTCCACCGCAC  
GCTATCTTCTGACTATTGCTCCATCATCTCCTGGCACAGACCTCTGTGGGTATCCATATCCTCATCGTG  
CCCCAGTC

GCTTGGTACAACCTTAGACATGATTGGGTTGGCAATGTCTTGCAACTCCTTCAACTTGTGCATCGAATTCTTC  
CTTGCTGGCAGTGGTGTGCTGTCTAACCAAGAAATAGTCTCTTCAGCCTTCTTGGTGACGGTGTCTTGT  
CAGCTTGT

GGTGAAAGTACCAGTCCATGGTTCAGTGGTGGTGTGATTAGACCTTCACTAGTTGGAGTTCTGATGACAA  
TGACGGTTTTCGTCAGTTGGAACGCCGTTGGTACCGGTGACGGTGGTCATTTTCAGTGGATGTAGAGGTAAAA  
GTGTCGTT

CAGCTTCTCCCCTATCATTGCTGCCATCCATATGGAGAACAGGCACGACTTCGTCGTTTTCTGTGGGTGCT  
ACAACCTTCTCGCCTTCTTCCCAACGAACCTTGGCAACAATGGATCCATTTGCTTGGACACTACCTCAAT  
ATGGTGGC

ATAACAGTGCAACGGCAAAGTACAAGGGAAGGAAGCACAGAAGCAAGAGGAGGCGCATCGATCGTGGCAGA  
TGAGTCAGCAAACACCACAGGAAAGTGAACAGACCACAGCGAAAGAACAGGACCTTGATCAAGAGAGCGTG  
TTGAGCAA

CGGTACCAGCGACAGAAGTACGAGCTTTCATGCATCAACACAGAAACAATCGCTACCAGGACATTCATTCA  
CCAGGACTTCCACAAGAAGGTCACCGACCTGCGAGCCAGGCTGCTGAACAGAACCACGCAGACCTGGTACG  
ATATCAAC

GAAGCAGTCTTAGAGCATAACGTCAGATTACACAAGAAGAAATTGTAACACTGTGGTTTTGTTTTGTTGTTTC  
TGTGGTTTTGCTCTGTTGTCCCCTTGGTTTTGCTTTGTTGTCTCCGTAGTTTGCTTTGTTATCTCTGTGGTAG  
AAATAGGG

TTGCTCTAACAACTGCTGTTGCTGGTTAATAAATAGTTCTTGGTTGGAAACCATGGGTTGTGGTGGCTGTG  
GCTGTGACTGTGACTGTAACCTGCGATTGCAATGGTTTCATCCTTGTATGGAGTATGCGTCAAGGCAGCGGC  
GACTCCTC

CATTACTGGAACCAACGGCGTTCCAACCTGACGAAACCGTCATTGTGCATCAGAACTCCAACAGTGAAGGTC  
TAATCAGCACCACCTGAACCATGGACTGGTACTTTTACTTCTACATCTACTGAAATGACCACCATTACT  
GGAACCAA

TTTTACTTCTACATCTACTGAAATGACCACCATTACTGGAACCAACGGCGTTCCAACCTGACGAAACCGTCA  
TTGTGCATCAGAACTCCAACAGTGAAGGTCTAATCAGCACCACCTGAACCATGGACTGGTACTTTTACT  
TCTACATC

GGCTGAACAAGGTGAACATGACGAAAACATCTCTCCTGCCAGGCCGCTGAGCTGGTGGGTGAAGATTTGT  
CACGTAGAGTGGCAGAACTGGCTGTAAAACCTGTACTCCAAGTGCAAAGATTATGCTAAGGAGAAGGGCATC  
ATCATCGC

TTCTAGGCTGCTAGTTGTCGGTCCTGAAGATGACGAAGATGAATTGATGGACGACGTTATGGATGATTTGA  
CTGGTTTTGTTGGACTCCGTTGACACAACCTGGTAAAGGTGTTGTGGTCCAAGCATCCACCTTGGGTTCTTTG  
GAAGCTTT

CGAATATGTAGACTTTGGTGATTGAGAAGAGATAGAAGAGGAAGAAGAGACAGAACTAGCTGAACTAGTTT  
CGCTCTCAGAAGAACCAGAGGTGGAACCTACTGGTTGGAATGACGGATGATTTAAATGATTGAGAGAATATA  
GAAGTGGA

AAAGCTGGTGATTTGTCCTGAAGAAGATGACAAACTGGATGAGATGGCAGTAGTTGGAGTTTTGACAATAA  
TGACAGTTTTCATCAGTTGGTTGACCGTTGGTTCCAGTGATGGTGGTCATCTCAGTAGATGTAGAGGTGAAA  
GTACCGGT

GTGACTACTGTTTTTCGTCTCAGCAGCTCCAGTACTGGTAGTTGTCTCAGCAGCTCCAGTATTGGTTGTTGT  
CTCACTGGTAGCACTGTTTCATTTTAGAGCTGACAGACTCTTCATTCGTAGTCTGTGGCCTCCATGTTGGAT  
AGACCGTA

CACTGAAATCACCACCGTCACCGGTACCACCGGTTTGCCAACTGATGAGACCATCATTGTCATCAGAACAC  
CAACAACAGCCACTACTGCCATGACTACAACCTCAGCCATGGAACGACACTTTTACCTCTACATCCACTGAA  
ATGACCAC

GGTAAAAGTGCTGTTCCATGGCTCAGTTGTAGTTATGATGGTGCTAGCAGTTGTTGGAGTTCTGATGACAA  
TGACGGTTTTCGTCAGTTGGAACGCCGTTGGTACCGGTGACGGTGGTCATTTTCAGTAGATGTAGAAGTGAAA  
GTACCGGT

AGAAGACGCCGCCAGAACGAAGAAATCAGTGCCACGCCAACTCCAAATCCAGAAAGCAGCGCAGGTGCAG  
ATGACACTTCCAGAGAAGCAAGTGCAAGTGCTGAAGGTGCTGAGGCCATTGAAGGCGACTTCATGTCTACT  
TTGAAGCA

ATTGTTATCAGAACTCCAACCAGTGAAGGTTTTGGTTACAACCACCACTGAACCATGGACTGGTACTTTTTAC  
TTCGACTTCCACTGAAATGTCTACTGTCACTGGAACCAATGGCTTGCCAACTGATGAAACTGTCAATTGTTG  
TCAAACT

ATAGGTGGTAATGATGAAGACGAATATGTAGACTTTGGTGATTGAGAAGAGATAGAAGAGGAAGAAGAGAC  
AGAAGTAGCTGAACTAGTTTTCGCTCTCAGAAGAACCAGAGGTGGAAGTACTGGTTGGAATGACGGATGATT  
TAAATGAT

ATGATTCAGAGAGTATAGAAGCGGAGGTTGTTGTAGAAGAAATGACAGGGGAAGAAATGAATGAAGAAGAA  
ATGACTGGAGAAGAAGTGACTAGAGAAGAAGTGACTGAGGAAGAAATGACTAGAGAAGAAGTGTCTGAGGA  
AGAAATTA

TCAGCATGATTGAATCTTGAAATTGAAGAGGTGACTACTGTTTTTCGTCTCAGCAGCTCCAGTACTGGTAGT  
TGTCTCAGCAGCTCCAGTATTGGTTGTTGTCTCACTGGTAGCACTGTTTCATTTTAGAGCTGACAGACTCTT  
CATTGTA

GCCATGGAACAGCACTTTTACCTCTACATCCACTGAAATGACCACCGTCACCGGTACCAACGGTTTTGCCAA  
CTGATGAAACCATCATTGTCATCAGAACACCAACAACAGCCACTACTGCCATAACTACAACCTCAGCCATGG  
AACGACAC

GGACCGGTACTTTCACTTCTACATCTACTGAAATGACGCACGTACCGGTACCAACGGCGTTCCAACCTGAC  
GAAACCGTCATTGTCATCAGAACTCCAACCAGTGAAGGTCTAATCAGCACCACCACTGAACCATGGACTGG  
CACTTTCA

CCTCCAAGTCATACCACTGTTACTGTTACTCACTGTGACAACAATGGCTGTAACACCAAGACTGTCACT  
TCTGAATGTTCTAAAGAACTGCAGCAACCACCACTTTCTCCAAAATCATACTACTGTTACCGTTACTCA  
CTGTGACG

CCGGTACCAATGGTTTTGCCAACTGATGAGACCATCATTGTCATCAGAACACCAACAACAGCCACTACTGCC  
ATGACTACAACCTCAGCCATGGAACGACACTTTTACCTCTACTTCTACCGAATTGACCACAGTCACCGGTAC  
CAATGGTT

TGAATCTTGAAATTGAAGAGGTGACTACTGTTTTTCGTCTCAGCAGCTCCAGTACTGGTAGTTGTCTCAGCA  
GCTCCAGTATTGGTTGTTGTCTCACTGGTAGCACTGTTTCATTTTAGAGCTGACAGACTCTTCATTCGTAGT  
CTGTGGCC

TCAGAGAATATAGAAGTGAGGTTGTTGTAGAAGAAATGACAGGGGAAGAAATGAATGAAGAAGAAATGAC  
TGGAGAAGAAGTGACTAGAGAAGAAGTGACTGAGGAAGAAATGACTAGAGAAGAAGTGTCTGAGGAAGAAA  
TTACTGAG

CGTCTGTGTTTTCAGCATGATTGAATCTTGAAATTGAAGAGGTGACTACTGTTTTCGTCTCAGCAGCTCCAG  
TACTGGTAGTTGTCTCAGCAGCTCCAGTATTGGTTGTTGTCTCACTGGTAGCACTGTTTCATTTTAGAGCTG  
ACAGACTC

CCACCCTGAACCATGGACTGGCACTTTCACTTCGACTTCCACTGAGGTTACCACCATCACTGGAACCAAC  
GGTCAACCAACTGACGAAACTGTGATTGTTATCAGAACTCCAACCAGTGAAGGTCTAATCAGCACCACCAC  
TGAACCAT

AAGTCACTACTGGACCAGGATGCCTCGGACGCCACCAAAATTCACTCTTGCACGACGCCTGTACGGCGCA  
CTCGCAAATCACAAGGAATGCTCCCAGGGGCTCGGCCAGGACCGTCACTTGTATGCGCTCTACTGCCTCT  
GGAACCAA

TTTAAATGATTAGAGAATATAGAAGTGGAGGTTGTTGTAGAAGAAATGACAGGGGAAGAAATGAATGAAG  
AAGAAATGACTGGAGAAGAAGTACTAGAGAAGAAGTACTGAGGAAGAAATGACTAGAGAAGAAGTGTCT  
GAGGAAGA

TACAACTACAACGGAACCATGGACCAGTACTTTCACTTCTACATCTACTGAAATGACCACCGTCACCGGTA  
CCAACGGCGTTCCAACCTGACGAAACCGTCATTGTCATCAGAACTCCAACAACCTGCTAGCACCATCATAACT  
ACAACCTGA

TGGTGGTCATCTCAGTAGATGTAGAGGTGAAAGTACCGGTCCATGGCTCGGTTGTAGTTGTAACCAAACCT  
TCACTGGTTGGAGTTCTGATAACAATCACGGTTTCGTGAGTTGGTTGACCGTTAGTACCGGTGACGGTGGT  
CATCTCAG

AAGTACCGGTCCATGGCTCGGTTGTAGTTGTAACCAAACCTTCACTGGTTGGAGTTCTGATAACAATCACG  
GTTTCGTGAGTTGGTTGACCGTTAGTACCGGTGACGGTGGTCATCTCAGTGGATGTAGAGGTGAAAGTACC  
AGTCCATG

GATGGAGAGGGAGGGTAGTTGACATGGAGTTAGAATTGGGTCAGTGTTAGTGTTAGTGTTAGTATTAGGGT  
GTGGTGTGTGGGTGTGGTGTGGGTGTGGGTGTGGGTGTGGGTGTGGGTGTGGTGTGGTGTGGTGTGGG  
TGTGGTGT

TTTCAGCATGATTGAATCTTGAAATTGAAGAGGTGACTACTGTTTTCGTCTCAGCAGCTCCAGTACTGGTA  
GTTGTCTCAGCAGCTCCAGTATTGGTTGTTGTCTCACTGGTAGCACTGTTTCATTTTAGAGCTGACAGACTG  
TTCATTTCG

GCGGAGGTTGTTGTAGAAGAAATGACAGGGGAAGAAATGAATGAAGAAGAAATGACTGGAGAAGAAGTGAC  
TAGAGAAGAAGTACTGAGGAAGAAATGACTAGAGAAGAAGTGTCTGAGGAAGAAATTAAGGAGGAGAA  
TCACAGAA

ACCATGGACTGGTACTTTTTACTTTCGACTTCCACTGAAATGTCTACTGTCACTGGAACCAATGGCTTGCCAA  
CTGATGAAACTGTCATTGTTGTCAAACCTCCAACCTACTGCCATCTCATCCAGTTTGTGTCATCATCTTCA  
GGACAAAT

TCCCACCGCAGCTATCTTCTGACTATTGCTCCATCATCTCCTGGCACAGACCTCTGTGGGGTATCCATA  
TCCTCATCGTGCCCCAGTCCCAGTTGCCTTTGCCATTAGACCCAAACGCATACACAACTCATCGATAC  
AAGCCTGT

CCTCTACATCCACTGAAATCACCACCGTCACCGGTACCACCGGTTTGCCAACTGATGAGACCATCATTGTC  
ATCAGAACACCAACAACAGCCACTACTGCCATGACTACAACCTCAGCCATGGAACGACACTTTTACCTCTAC  
ATCCACTG

CCAGCTTTGTCTGAAAAGGACAAGGAAGATTTGAGATTCCGGTGTCAAGAACGGTGTCCACATGGTCTTCGC  
TTCTTTTCATCAGAACCGCAACGATGTTTTGACCATCAGAGAAGTCTTGGGTGAACAAGGTAAGGACGTCA  
AGATCATT

CCACACCACACCCACACACCCACACACCACACCACACACCACACCACACCCACACACACACATCCTAACAC  
TACCCTAACACAGCCCTAATCTAACCCCTGGCCAACCTGTCTCTCAACTTACCCTCCATTACCCTGCCTCCA  
CTCGTTAC

GCCGTCTGTGTTTTAGCATGATTGAATCTTGAAATTGAAGAGGTGACTACTGTTTTCGTCTCAGCAGCTCC  
AGTACTGGTAGTTGTCTCAGCAGCTCCAGTATTGGTTGTTGTCTCACTGGTAGCACTGTTTCAATTTAGAGC  
TGACAGAC

TTTGGTTGGTAGACAAGTCCTTCTTGTCTTTCTCTTGAATTCTTGGATGAAGTGGTTGACCAATCTGTTG  
TCAAAATCTTACCACCCAAATGGGTGTCACCAGCGGTGGCCTTAACTTCAAAGATACCGTCTTCAATGGA  
CAACAAAG

TATCTTCCACTCATTGGATCAGCTTCTCCCCTATCATTGCTGCCATCCATATGGAGAACAGGCACGACTT  
CGTCGTTTTCTGTGGGTGCTACAACCTTTCTCGCCTTCTTCCAACGAACCTTGGCAACAATGGATCCATT  
TGCTTGA

TCAATGATCAGACTGACACGTTGCTCGAAATCCTGGATGAAGAAGCCAAGCAGTTCTTACGAATCAGGTC  
ACTGGCCTCTTGTGCTTCGATTCTCTCGTAACCAATCTGATTAAGACGTGTAACCATGACGAGGAGTCTG  
CATCGTCC

ATTGTCATCAGAACTCCAAGTGAAGGTCTAATCAGCACCACCCTGAACCATGGACTGGTACTTTTAC  
CTCTACATCCACTGAGATGACCACCGTCACCGGTACTAACGGTCAACCAACTGACGAAACCGTGATTGTTA  
TCAGAACT

ACTGCCATGACTACAACCTCAGCCATGGAACGACACTTTTACCTCTACTTCTACCGAATTGACCACAGTCAC  
CGGTACCAATGGTTTTGCCAACTGATGAGACCATCATTGTCATCAGAACACCAACAACAGCCACTACTGCCA  
TGACTACA

AAGGATAATGGAGCGACATCCAACAACAATAGATCTTGAGTCTTGGAAGATTTCGTCACCAGTCAAAATAGC  
AGCTTGAACAGCAGCACCCTAAGCAACAGCTTCTATCTGGGTTGATAGATCTGTTTTGGTTCTTACCCTTGA  
AGTAGTCA

ACCACCATCACTGGAACCAACGGTCAACCAACTGACGAAACTGTGATTGTTATCAGAACTCCAACCAGTGA  
AGGTCTAATCAGCACCACCCTGAACCATGGACTGGTACTTTCACTTCTACATCTACTGAAATGACCACCG  
TCACCGGT

GTTTGTGGGGTGTGGTGATGGATAGTGAGTGGATAGTGAGTGGATGGATGGTGGAGTGGGGGAATGAGAC  
AGGGCATGGGGTGGTGAGGTAAGTGCCGTGGATTGTGATGATGGAGAGGGAGGGTAGTTGACATGGAGTTA  
GAATTGGG

GTTGTAGTTGTAACCAAACCTTCACTGGTTGGAGTTCTGATAACAATCACGGTTTTCGTCAGTTGGTTGACC  
GTTAGTACCGGTGACGGTGGTCATCTCAGTGGATGTAGAGGTGAAAGTACCAGTCCATGGTTTCACTGGTGG  
TGCTGATT

AGCAGGCTTGATGGGATCGTTATGAGATGACCTCGTGGTTCATGGAGTCCCTGAGTGTGGTATGGACATCC  
CAGAATCCATCGAGTTTGTGAACCTCGCTGTCGTCATCACCAGTGTGTCATTATTGCGAAGATGCCTG  
CCACTAGG

TAGACACAGAAGAGTTCTCGATGAAAGCTAGGGCAAAAAGCACTAGGGAGGGCAGGACACCAGCAACGGCT  
TGCCCCACCATGACACCTTACTGTACTCGGAACCGAAGACGTTGGCTATGGCCATGATACCATTCTGTGT  
CATGGCTG

CCATGGCTCGGTTGTAGTTGTAACCAAACCTTCACTGGTTGGAGTTCTGATAACAATCACGGTTTTCGTCAG  
TTGGTTGACCGTTAGTACCGGTGACGGTGGTCATCTCAGTGGATGTAGAGGTGAAAGTACCAGTCCATGGT  
TCAGTGGT

GACCACGTTATTTCTGCTGGTGAACGAGTGGGGACAGTTCAATTCTGTGGTAACAAGGCCACAATTGGTGG  
TGGACCGTGACCGACACGCAAAGCTGGAGCTTAATATGGATGTGACATTTCCATCGATGCCATGTGACCTG  
GTGAATCT

CTGCCATCCATATGGAGAACAGGCACGACTTCGTCGTTTTCTGTGGGTGCTACAACCTTTCTCGCCTTCTT  
CCCAACGAACCTTGGCAACAATGGATCCATTTGCTTGGACACTACCTCAATATGGTGGCTGTTGTTCAATA  
ATAGATTC

CATCAGTTGGTTGACCGTTGGTTCAGTGATGGTGGTCATCTCAGTAGATGTAGAGGTGAAAGTACCGGTC  
CATGGCTCGGTTGTAGTTGTAACCAAACCTTCACTGGTTGGAGTTCTGATAACAATCACGGTTTCGTCAGT  
TGGTTGAC

TTTTGAATCTTCAGTATGAGTTGACGGAGGTGTGGAATCGGTTGGACTCACAGCTTTTGAAAGGACATTTTC  
TCGGTTGCTCAGGATGTAGTTCAATGTCGGATTGGAAGTCATGGTCAGATTCTATGTTAAGATCATTGGAT  
TCTTGGAT

TGAACGAGTGGGGACAGTTCAATTCTGTGGTAACAAGGCCACAATTGGTGGTGGACCGTGACCGACACGCA  
AAGCTGGAGCTTAATATGGATGTGACATTTCCATCGATGCCATGTGACCTGGTGAATCTCGATATTATGGA  
CGACTCTG

GGACCGGTACTTTCACTTCTACATCTACTGAAATGACCACCGTACCAGGTACCAACGGCGTTCCAACCTGAC  
GAAACCGTCATTGTGTCATCAGAACTCCAACAACCTGCTAGCACCATCATAACTACAACCTGAGCCATGGAACAG  
CACTTTTA

GTGACAAAGGTGAAGGTTGGCGACCACGTGGTCGTTGATGCTGCCAGCAGTTGTGCGGACCTGCATTGCTG  
GCCACACTCCAAATTTTACAATTCCAACCATGTGATGCTTGTGTCAGAGGGGAGTAAAATCTATGTACCC  
ACGCCGGT

TTCCAACCTGACGAAACCGTCATTGTGTCATCAGAACTCCAACCTAGTGAAGGTCTAATCAGCACCACCTGAA  
CCATGGACTGGTACTTTTACCTCTACATCCACTGAGATGACCACCGTACCAGGTACTAACGGTCAACCAAC  
TGACGAAA

TTGTTGCTGGTTCTGACTTGAGAAGAACCTCCATCATTGGTACCATCGGTCCAAAGACCAACAACCCAGAA  
ACCTTGGTTGCTTTGAGAAAGGCTGGTTTGAACATTGTCCGTATGAACTTCTCTCACGGTTCTTACGAATA  
CCACAAGT

GCTTTACCTCTGGCAATGGGCCATGAGATGTCAGGAATTGTTTCCAAGGTTGGTCCTAAAGTGACAAAGGT  
GAAGGTTGGCGACCACGTGGTCGTTGATGCTGCCAGCAGTTGTGCGGACCTGCATTGCTGGCCACACTCCA  
AATTTTAC

CGAAACCGTGATTGTTATCAGAACTCCAACCAAGTGAAGGTTTGGTTACAACCACCTGAAACCATGGACTG  
GTACTTTTACTTTCGACTTCCACTGAAATGTCTACTGTCACTGGAACCAATGGCTTGCCAACCTGATGAAACT  
GTCATTGT

TGCCAACTGATGAGACCATCATTGTGTCATCAGAACACCAACAACAGCCACTACTGCCATGACTACAACCTCAG  
CCATGGAACGACACTTTTACCTCTACATCCACTGAAATCACCACCGTACCAGGTACCAATGGTTTGCACAC  
TGATGAGA

TTTTACCTCTACATCCACTGAAATGACCACCGTACCAGGTACCAACGGCGTTCCAACCTGACGAAACCGTCA  
TTGTCATCAGAACTCCAACCTAGTGAAGGTCTAATCAGCACCACCTGAAACCATGGACTGGTACTTTTACCT  
TCTACATC

CAGAAAGCAGCGCAGGTGCAGATGACACTTCCAGAGAAGCAAGTGCAAGTGCTGAAGGTGCTGAGGCCATT  
GAAGGCGACTTCATGTCTACTTTGAAGCAATCGAAGAAGAAGCAAGAAAAGAAGGTTATTGAAGAGAAGAA  
GGATGGTA



TTCAATACCCAAGGATAATGGAGCGACATCCAACAACAATAGATCTTGAGTCTTGGAAGATTCGTCACCAG  
TCAAAATAGCAGCTTGAACAGCAGCACCCTAAGCAACAGCTTCATCTGGGTTGATAGATCTGTTTGGTTCC  
TTACCGTT

ATGATGAAGACGAATATGTAGACTTTGGTGATTCAGAAGAGATAGAAGAGGAAGAAGAGACAGAAGCTAGCT  
GAACTAGTTTCGCTCTCAGAAGAACCAGAGGTGGAAGTACTGGTTGGAATGACGGATGATTTAAATGATTC  
AGAGAATA

ATGGTCTTCGCTTCTTTTCATCAGAACCGCCAACGATGTTTTGACCATCAGAGAAGTCTTGGGTGAACAAGG  
TAAGGACGTCAAGATCATTGTCAAGATTGAAAACCAACAAGGTGTTAACAACCTTCGACGAAATCTTGAAGG  
TCACTGAC

CTCGAAGCAACGATAGACAATCCGGTGATCAGTTTTCGTGCTGTCCATTTGCAAGATGGCCTCTGTGGACAG  
CTTGATAAGTATGTCATTGGGTAGCTGGGTACATCCTGGTTGGAGTTCGAACTGTTTCATCAATGAGTACA  
CAGATGAG

GTCCGCTGAGGATGAATCAGTAAATGTATTACCTGACTCAGGTGATGGAGTGCTCAGAGGCGTTCCAAGT  
ATGATGGATACTGCGGAAACTGTGATTGTGGCCAGGTGGAAAGTACATAGGCGACATTTGATAAGGTGTA  
TACGGAAT

CAACTTGTTCATCGAATTCCTTCTTGGCTGGCAGTGGTGTGCTGTCTAACCAAGAAATAGTCTCTTCAGCCT  
TCTTGGTGACGGTGTCTTGTGAGCTTGTTCGAATTTGTACCAGCTTCAGAAATGGTGTCTTCAAAGAG  
TAAGCAAT

CGGCGGGCTGATCACTTTATCGTGCATCTTGACCACGTTATTTCTGCTGGTGAACGAGTGGGGACAGTTCA  
ATTCTGTGGTAACAAGGCCACAATTGGTGGTGGACCGTGACCGACACGCAAAGCTGGAGCTTAATATGGAT  
GTGACATT

ACTCAGCCATGGAACGACACTTTTACCTCTACATCCACTGAAATGACCACCGTCACCGGTACCAACGGCGT  
TCCAAGTACGAAACCGTCATTGTTCATCAGAAGTCCAAGTACTGAAAGTCTAATCAGCACCACCCTGAA  
CATGGACT

CTAATCAGCACCACCCTGAACCATGGACTGGCACTTTCACTTCGACTTCCACTGAGGTTACCACCATCAC  
TGGAACCAACGGTCAACCAACTGACGAAACTGTGATTGTTATCAGAAGTCCAACAGTGAAGGTCTAATCA  
GCACCACC

ACTGATGAGACCATCATTGTTCATCAGAACACCAACAACAGCCACTACTGCCATGACTACAAGTACAGCCATG  
GAACGACACTTTTACCTCTACATCCACTGAAATGACCACCGTCACCGGTACCAACGGCGTTCCAAGTACG  
AAACCGTC

GTTTCAGTGGTGGTGTGATTAGACCTTCACTAGTTGGAGTTCTGATGACAATGACGGTTTTCGTCAGTTGGA  
ACGCCGTTGGTACCGGTGACGGTGGTCAATTTTCAGTGGATGTAGAGGTAAGGTGTCGTTCCATGGCTGAGT  
TGTAGTCA

TGCTACGGATCGTATCTCTGCATATGACGTTATTATGGAAAACAGCATTCTGAAAAGGGGATCCTATTGA  
CCAAACTGTGAGAGTTCTGGTTCAAGTTCTGTCCAACGATGTTTGTAAATCATTGGTTCGACATCGCCCCA  
GGTAAGAC

GCCATAAATTATCCAACGCTGCTTTACCTCTGGCAATGGGCCATGAGATGTCAGGAATTGTTTCCAAGGTT  
GGTCTAAAGTGACAAAGGTGAAGGTTGGCGACCACGTGGTCTGTTGATGCTGCCAGCAGTTGTGCGGACCT  
GCATTGCT

GAAGAAATGACAGGGGAAGAAATGAATGAAGAAGAAATGACTGGAGAAGAAGTACTAGAGAAGAAGTGAC  
TGAGGAAGAAGTACTAGAGAAGAAGTGTCTGAGGAAGAATTAAGTACTGAGGAGGAAATCACAGAAGTTCCAT  
TGCTAGGA

GTC AAGATTGAAAACCAACAAGGTGTTAACAACTTCGACGAAATCTTGAAGGTC ACTGACGGTGT TATGGT  
TGCCAGAGGTGACTTGGGTATTGAAATCCCAGCCCCAGAAGTCTTGGCTGTCCAAAAGAAATTGATTGCTA  
AGTCTAAC

TGGATAAGATATATTGGGCAGGGGATAGATGGTTGTTGGGGTGTGGTGATGGATAGTGAGTGGATAGTGAG  
TGGATGGATGGTGGAGTGGGGGAATGAGACAGGGCATGGGGTGGTGAGGTAAGTGCCGTGGATTGTGATGA  
TGGAGAGG

AGGAATTCGAAGAAGACGCCGCCAGAACGAAGAAATCAGTGCCACGCCAACTCCAAATCCAGAAAGCAGC  
GCAGGTGCAGATGACACTTCCAGAGAAGCAAGTGCAAGTGCTGAAGGTGCTGAGGCCATTGAAGGCGACTT  
CATGTCTA

AATGACAGGGGAAGAAATGAATGAAGAAGAAATGACTGGAGAAGAAGTACTAGAGAAGAAGTACTGAGG  
AAGAAATGACTAGAGAAGAAGTGTCTGAGGAAGAAATTACTGAGGAGGAAATCACAGAAGTTCCATTGCTA  
GGATAGAA

AAATGACCACCGTCACCGGTACCAACGGTTTTGCCAACTGATGAAACCATCATTGTCATCAGAACACCAACA  
ACAGCCACTACTGCCATGACTACAACCTCAGCCATGGAACGACACTTTTACCTCTACATCCACTGAAATCAC  
CACCGTCA

TGAGACCATCATTGTCATCAGAACACCAACAACAGCCACTACTGCCATGACTACAACCTCAGCCATGGAACG  
ACACTTTTACCTCTACTTCTACCGAATTGACCACAGTCACCGGTACCAATGGTTTGGCAACTGATGAGACC  
ATCATTGT

AGTGGTGTGTGCTGTCTAACCAAGAAATAGTCTCTTCAGCCTTCTTGGTGACGGTGTCTTGTGCTGAGCTTGT  
CCAATTTGTACCAGCTTCAGAAATGGTGTCTTCAAAGAGTAAGCAATGGATTCCAATTGGTTCTTGGAA  
GCAATTCT

TCGAATTCCTTCTTGGCTGGCAGTGGTGTGTCTAACCAAGAAATAGTCTCTTCAGCCTTCTTGGTGAC  
GGTGTCTTGTGCTGAGCTTGTTCGAATTTGTACCAGCTTCAGAAATGGTGTCTTCAAAGAGTAAGCAATGG  
ATTCCAAT

CCAACCTACAAGATCTCCTAAAGAAACAATTCCAGCCGCTAGACGACCCAAACGTCCAACAAGTGCTCCAT  
CTCATGCTCCACTATGCCGTGCAAGTCGCCCCATGGCTGTATAAAGGAAATCGTCCATCATTGGGTCTC  
AACTACAA

CGGTACAGAATTGATGTACGTATTCATTAATCCGTGTACCTCGAAGCAACGATAGACAATCCGGTGATCA  
GTTTCGTGCTGTCCATTTGCAAGATGGCCTCTGTGGACAGCTTGATAAGTATGTCATTGGGTAGCTGGGT  
ACATCCTG

TGGTCCTAAAGTGACAAAGGTGAAGGTTGGCGACCACGTGGTCTGTTGATGCTGCCAGCAGTTGTGCGGACC  
TGCATTGCTGGCCACACTCCAAATTTTACAATTTCAAACCATGTGATGCTTGTGAGAGGGGCGAGTAAAAAT  
CTATGTAC

ACATCCACTGAAATGACCACCGTCACCGGTACCAACGGTTTTGCCAACTGATGAAACCATCATTGTCATCAG  
AACACCAACAACAGCCACTACTGCCATGACTACAACCTCAGCCATGGAACGACACTTTTACCTCTACATCCA  
CTGAAATC

GCCCTCTTGCCACTTGCAAACAGACGCCACGTGCATCACGTGGTGGCGATGTATCGTGGCCAGTTCTACT  
GGTTGACGTGCTGGACACACGCAACGAGCCCATCTTCGCCACCCAGAACAACCTGGAGTGGAACCTCTAC  
TCGATCAT

CGATAGACAATCCGGTGATCAGTTTTCGTGCTGTCCATTTGCAAGATGGCCTCTGTGGACAGCTTGATAAGT  
ATGTCATTGGGTAGCTGGGTACATCCTGGTTGGAGTTGCAACTGTTTCATCAATGAGTACACAGATGAGTA  
GGTGTTC

CCAGTCCATGGTTTCAGTGGTGGTGTCTGATTAGACCTTCACTAGTTGGAGTTCTGATGACAATGACGGTTTC  
GTCAGTTGGAACGCCGTTGGTACCGGTGACGGTGGTCATTTTCAGTGGATGTAGAGGTAAGTGTCTGTTCC  
ATGGCTGA

GAACTCCAAGTGTGAAGGTCTAATCAGCACCACCCTGAACCATGGACTGGTACTTTACCTCTACATCC  
ACTGAGATGACCACCGTACCGGTACTAACGGTCAACCAACTGACGAAACCGTGATTGTTATCAGAACTCC  
AACCAGTG

TCAGCAGCTCCAGTACTGGTAGTTGTCTCAGCAGCTCCAGTATTGGTTGTTGTCTCACTGGTAGCACTGTT  
CATTTTAGAGCTGACAGACTGTTTCATTTCGTAGTCTGTGGCCTCCATGTAGAATAGACCGTAACAACATCAT  
TCACAGTA

CAGCACTACAACGGAACCATGGACCGGTACTTTCACTTCTACATCTACTGAAATGACGCACGTACCGGTA  
CCAACGGCGTTCCAAGTACGAAACCGTCATTGTCATCAGAACTCCAACCAGTGAAGGTCTAATCAGCACC  
ACCACTGA

CTGAAGAACTGGCGCTGTCTCCGCATCTATCTATTCATTTCACACCTAGCTCGTTCAAGAGCAGCGGTGAC  
ATTTCTTTGAGTTTGTCAAAGGCCAAGAAGGGTGAAGTACCTTTTCTCCATACTCTAACGCTGGTACCTT  
TTCTTTGT

TATGAGATGACCTCGTGGTCATGGAGTCCCTGAGTGATGGTATGGACATCCAGAATCCATCGAGTTTGTG  
AACTCGCTGTCTCATCATCACCAGTGTGTCATTATTGCGAAGATGCCTGCCACTAGGAATCCATCGACG  
TACCATGG

GGTGAACAAGGTAAGGACGTCAAGATCATTGTCAAGATTGAAAACCAACAAGGTGTTAACAACCTTCGACGA  
AATCTTGAAGGTCACTGACGGTGTATGGTTGCCAGAGGTGACTTGGGTATTGAAATCCAGCCCCAGAAG  
TCTTGGCT

AACAGCCACTACTGCCATGACTACAACCTCAGCCATGGAACGACACTTTTACCTCTACATCCACTGAAATCA  
CCACCGTACCGGTACCAATGGTTTGGCAACTGATGAGACCATCATTGTCATCAGAACACCAACAACAGCC  
ACTACTGC

TAGAAACACGTTTTCGAATCTTCAGTATGAGTTGACGGAGGTGTGGAATCGGTTGGACTCACAGCTTTTGA  
AGGACATTTCTCGGTTGCTCAGGATGTAGTTCAATGTGCGATTGGAAGTCATGGTCAGATTCTATGTTAAG  
ATCATTGG

AGTGAAGTGTGGTCAATTCGGTGTAGAGTGTAGAGGTAAGTGTCTGTTCCATGGCTCAGTTGTAGTTATGATGG  
TGCTAGCAGTTGTTGGAGTTCTGATGACAATGACGGTTTCGTGAGTTGGAACGCCGTTGGTACCGGTGACG  
GTGGTCAT

ATGGAGTCCCTGAGTGATGGTATGGACATCCAGAATCCATCGAGTTTGTGAACTCGCTGTCTCATCATC  
ACCAGTGTGTCATTATTGCGAAGATGCCTGCCACTAGGAATCCATCGACGTACCATGGCTATAACTTTCC  
TTATGTTG

ACCAACGGCGTTCCAAGTACGAAACCGTCATTGTCATCAGAACTCCAAGTGTGAAGGTCTAATCAGCAC  
CACCCTGAACCATGGACTGGTACTTTACCTCTACATCCACTGAGATGACCACCGTACCGGTACTAACG  
GTCAACCA

TTGTTGCACTGGTAACAGGTGGTAATGATGAAGTAATTTCTGACTTGTGTTGTACTGGTAACAGGTGGT  
AATGATGAAGCAGTTTCTGGCTTGTGTTGTCAGTGGTAATAGGTGGTAATGATGAAGACGAATATGTAGA  
CTTTGGTG

CAGACGTGATAAAGCTGGTGATTTGTCTGAAGAAGATGACAACTGGATGAGATGGCAGTAGTTGGAGTT  
TTGACAATAATGACAGTTTCATCAGTTGGTTGACCGTTGGTTCCAGTGATGGTGGTTCATCTCAGTAGATGT  
AGAGGTGA

GAACTCCAACCAGTGAAGGTTTGGTTACAACCACCACTGAACCATGGACTGGTACTTTTACTTCGACTTCC  
ACTGAAATGTCTACTGTCACTGGAACCAATGGCTTGCCAACCTGATGAAACTGTCATTGTTGTCAAACTCC  
AACTACTG

GAACACCAACAACAGCCACTACTGCCATGACTACAACCTCAGCCATGGAACGACACTTTTACCTCTACATCC  
ACTGAAATCACCACCGTCACCGGTACCAATGGTTTGCCAACCTGATGAGACCATCATTGTCATCAGAACACC  
AACAAACAG

CATCAGAACACCAACAACAGCCACTACTGCCATGACTACAACCTCAGCCATGGAACGACACTTTTACCTCTA  
CATCCACTGAAATGACCACCGTCACCGGTACCAACGGCGTTCCAACCTGACGAAACCGTCATTGTCATCAGA  
ACTCCAAC

AAGGGCTACTATAACATTTGTTTCATATTTGGGGCTTTGTGGTGCGGGTGTGCAGAGCGGTGGATTTGCAGA  
ACGTGTTGTGATGAACGAATCTCACTGCTACAAAGTACCGGACTTCGTGCCCTTAGACGTTGCAGCTTTGA  
TTCAACCG

TCATTTGGATCAGCTTCTCCCCTATCATTGCTGCCATCCATATGGAGAACAGGCACGACTTCGTGCTTTTTC  
TGTGGGTGCTACAACCTTTCTCGCCTTCTTCCCAACGAACCTTGGCAACAATGGATCCATTTGCTTGGACA  
CTACCTCA

TAGTGAGAGTTGGATAAGATATATTGGGCAGGGGATAGATGGTTGTTGGGGTGTGGTGATGGATAGTGAGT  
GGATAGTGAGTGGATGGATGGTGGAGTGGGGGAATGAGACAGGGCATGGGGTGGTGAAGTACCCTGG  
ATTGTGAT

ACTGCCATGACTACAACCTCAGCCATGGAACGACACTTTTACCTCTACATCCACTGAAATCACCACCGTCAC  
CGGTACCACCGTTTTGCCAACCTGATGAGACCATCATTGTCATCAGAACACCAACAACAGCCACTACTGCCA  
TGACTACA

GATTGGGTTGGCAATGTCTTGCAACTCCTTCAACTTGTGATCGAATTCTTCTTGGCTGGCAGTGGTGTTC  
TGTCTAACCAAGAAATAGTCTCTTCCAGCCTTCTTGGTGACGGTGTCTTGTGAGCTTGTTCCAATTTGTCA  
CCAGCTTC

GGCACTTTCACTTCGACTTCCACTGAGGTTACCACCATCACTGGAACCAACGGTCAACCAACTGACGAAAC  
TGTGATTGTTATCAGAACTCCAACCAGTGAAGGTCTAATCAGCACCACCACTGAACCATGGACTGGTACTT  
TCACTTCT

TATAAGAACTACTACCTCATGAATTCTAGTGGATGAAAGAAGCAGCAGCAACACCATTTCTACAGACAACG  
ACACATGGAAAGGTTACCATTCCCAAAGAAAACAACGATGGCCACAAGGGTGTGGTCTCCATTCTCCTA  
CTGTTGGA

GAACTCCAACAACCTGCTAGCACCATCATAACTACAACCTGAGCCATGGAACAGCACTTTTACCTCTACTTCT  
ACCGAATTGACCACAGTCACTGGCACCATGGTGTACGAACTGACGAAACCATCATTGTAATCAGAACACC  
AACAAACAG

ATATTGGTTTTAGAAACACGTTTTCGAATCTTCAGTATGAGTTGACGGAGGTGTGGAATCGGTTGGACTCAC  
AGCTTTTTGAAAGGACATTTCTCGGTTGCTCAGGATGTAGTTCAATGTCGGATTGGAAGTCATGGTCAGATT  
CTATGTTA

TTTGACAATAATGACAGTTTCATCAGTTGGTTGACCGTTGGTTCCAGTGATGGTGGTCATCTCAGTAGATG  
TAGAGGTGAAAGTACCGGTCCATGGCTCGGTTGTAGTTGTAACCAACCTTCACTGGTTGGAGTTCTGATA  
ACAATCAC

ACGTCTCTCCCAACAGGTAGCATCGTCTCCCTTAAAGCCTACTTCGCCAACAGTTCGGATGCAAG  
TGTGGCGTCTTTGAGAAGCAGGTTTACTTTCAAGCCTTCAGATCCAGCGAAGGAGCTCATACTTCGAAGC  
CGCTCCCA

CTGTGGTCAATTCGGTAGAAGTAGAGGTAAAAGTGTCTGTTCCATGGCTGAGTTGTAGTCATGGCAGTAGTG  
GCTGTTGTTGGTGTCTGATGACAATGATGGTCTCATCAGTTGGCAAACCATTGGTACCGGTGACTGTGGT  
CAATTCGG

TTGTAGATAACAATGGCTGGAGAAGCAGTCTTAGAGCATAACGTCAGATTCACAAGAAGAAATTGTAACACT  
GTGGTTTTGTTTTGTTGTTTTCTGTGGTTTTGCTCTGTTGTCCCCTTGGTTTTGCTTTGTTGTCTCCGTAGTTT  
CTTTGTTA

AAATGACCACCGTCACCGGTACCAACGGCGTTCCAACCTGACGAAACCGTCATTGTTCATCAGAACTCCAACA  
ACTGCTAGCACCATCATAACTACAACCTGAGCCATGGAACAGCACTTTTACCTCTACTTCTACCGAATTGAC  
CACAGTCA

CATTCTGTGGTGAATGTGACTGAGCAGTTTGAGGAGAGGCATGATGGGGTTCTCTGGAACAGCTGATGAA  
GCAGGTGTTGTTGTCTGTTGAGAGTTAGCCTTAGTGGAAGCCTTCTCACATTCTTCTGTTTTGGAAGCTGA  
AACGTCTA

ATGACAGTTTCATCAGTTGGTTGACCGTTGGTTCCAGTGATGGTGGTCATCTCAGTAGATGTAGAGGTGAA  
AGTACCGGTCCATGGCTCGGTTGTAGTTGTAACCAAACCTTCACTGGTTGGAGTTCTGATAACAATCACGG  
TTTCGTCA

AATCAGAACACCAACAACAGCCACTACTGCCATAACTACAACCTGAGCCATGGAACAGCACTTTTACCTCTA  
CTTCTACCGAATTGACCACAGTCACCGGTACCAATGGTTTTGCCAACTGATGAGACCATCATTGTCATCAGA  
ACACCAAC

TTGTTGGAATCGTTCATCAGAGCAGGCTTGATGGGATCGTTATGAGATGACCTCGTGGTCATGGAGTCCCT  
GAGTGATGGTATGGACATCCCAGAATCCATCGAGTTTGTGAACTCGCTGTCGTCATCATCACCAGTGTGT  
CATTATTG

TCCTGGATGAAGAAGCCAAGCAGTTCTTCACGAATCAGGTCCTGGCCTCTTGTGCTTCGATTCCCTCTCGT  
AACCAATCTGATTAAGACGTGTAACCATGACGAGGAGTCGTCATCGTCCAGTAATATGGAGGAGGAAGACG  
AAGATTTG

AAGAAGATGACAAACTGGATGAGATGGCAGTAGTTGGAGTTTTGACAATAATGACAGTTTCATCAGTTGGT  
TGACCGTTGGTTCCAGTGATGGTGGTCATCTCAGTAGATGTAGAGGTGAAAGTACCGGTCCATGGCTCGGT  
TGTAGTTG

TAGAAGTGGAGGTTGTTGTAGAAGAAATGACAGGGGAAGAAATGAATGAAGAAGAAATGACTGGAGAAGAA  
GTGACTAGAGAAGAAGTACTGAGGAAGAAATGACTAGAGAAGAAGTGTCTGAGGAAGAAATTACTGAGGA  
GAAATCA

TCTTGCAATCGCTTCCCTCAGGGCTCCCATGCGGTCTCTATCGGTGATGTGTACGGTGGTACCCACAGATAC  
TTCACCAAAGTCGCCAACGCTCACGGTGTGGAAACCTCCTTCACTAACGATTTGTTGAACGATCTACCTCA  
ATTGATAA

CAACTGCTACCGACGCAACTGCAACCGTTTTCTCCAAGTCATACACCCTGTTACTGTTACTCACTGTGAC  
AACAAATGGCTGTAACACCAAGACTGTCACCTTCTGAATGTTCTAAAGAACTGCAGCAACCACCATTTCTCC  
AAAATCAT

AATAGCACCTCCTCCGCAGACTTGAGTTCTATCACTTCCGTCTCGTCAGCTAGTGCAAGTGCCACCGCTTC  
CGACTCACTTTCTTCCAGTGACGGTACCGTTTATTTGCCATCCACAACAATTAGCGGTGATCTCACAGTTA  
CTGGTAAA

CCGTTTTCTGGTTCTAGGCTGCTAGTTGTCTGGTCTGAAGATGACGAAGATGAATTGATGGACGACGTTATG  
GATGATTTGACTGGTTTTGTTGGACTCCGTTGACACAACCTGGTAAAGGTGTTGTGGTCCAAGCATCCACCTT  
GGTTCTT

CTCTTACACCAATAGCACCTCCTCCGCAGACTTGAGTTCTATCACTTCCGTCTCGTCAGCTAGTGCAAGTG  
CCACCGCTTCCGACTCACTTTCTTCCAGTGACGGTACCGTTTATTTGCCATCCACAACAATTAGCGGTGAT  
CTCACAGT

CGACGCAACTGCAACCGTTTTCTCCAAGTCATACACCACTGTTACTGTTACTCACTGTGACAACAATGGCT  
GTAACACCAAGACTGTCACCTTCTGAATGTTCTAAAGAACTGCAGCAACCACCATTTCTCCAAAATCATA  
ACTACTGT

CTCAAAGCTCTTTGGTTGGTAGACAAGTCCTTCTTGTCTTTCTTCTTGAATTCTTGGATGAAGTGGTTGAC  
CAATCTGTTGTCAAATCTTACCACCCAAATGGGTGTCACCAGCGGTGGCCTTAACTTCAAAGATACCGT  
CTTCAATG

GTGTCAAGAACGGTGTCCACATGGTCTTCGCTTCTTTTCATCAGAACCGCCAACGATGTTTTGACCATCAGA  
GAAGTCTTGGGTGAACAAGGTAAGGACGTCAAGATCATTGTCAAGATTGAAAACCAACAAGGTGTTAACAA  
CTTCGACG

GACACTTTTACCTCTACATCCACTGAAATCACCACCGTCACCGGTACCACCGTTTTGCCAACTGATGAGAC  
CATCATTGTATCAGAACACCAACAACAGCCACTACTGCCATGACTACAACCTCAGCCATGGAACGACACTT  
TTACCTCT

GGTCATGTGTAAGACGGCTAGGTAAATTTTCAGTGCATATTGAACTCCAGGGACTTACAAGTAGTGGTGGT  
AGCGATGCAGCAGTCGTTCTGAAGATATAGGCAGTTTTGTCAAATTTGTTGTTGATAGCGATGTAGAGGA  
TGTGCTGA

ATCCAACGCTGCTTTACCTCTGGCAATGGGCCATGAGATGTCAGGAATTGTTTTCCAAGGTTGGTCCTAAAG  
TGACAAAGGTGAAGGTTGGCGACCACGTGGTCGTTGATGCTGCCAGCAGTTGTGCGGACCTGCATTGCTGG  
CCACACTC

CACGAAGATGAGAAAGAGGCGATAGATGAGGCCAAGAAGATGAAAGTGCCGGGAGAGAACGAGGACGAAAG  
CAAGGAAGAGGAAAAGAGTCAAGAACTGGAAGAGGCAATTGACAGCAAGGAGAAGAGCACCGACGCCAGGG  
ACGAGCAA

CTACAACCTGAGCCATGGAACAGCACTTTTACCTCTACTTCTACCGAATTGACCACAGTCACTGGCACCAAT  
GGTGTACGAACTGACGAAACCATCATTGTAATCAGAACACCAACAACAGCCACTACTGCCATAACTACAAC  
TGAGCCAT

TGAATGTGACTGAGCAGTTTGAGGAGAGGCATGATGGGGTTCTCTGGAACAGCTGATGAAGCAGGTGTTG  
TTGTCTGTTGAGAGTTAGCCTTAGTGGAAGCCTTCTCACATTCTTCTGTTTTGGAAGCTGAAACGTCTAAC  
GGATCTTG

CTACAACCTGAGCCATGGAACAGCACTTTTACCTCTACATCCACTGAAATGACCACCGTCACCGGTACCAAC  
GGTTTTGCCAACTGATGAAACCATCATTGTATCAGAACACCAACAACAGCCACTACTGCCATAACTACAAC  
TCAGCCAT

TGGATGTAGAGGTGAAAGTACCAGTCCATGGTTCAGTGGTGGTGTGATTAGACCTTCACTAGTTGGAGTT  
CTGATGACAATGACGGTTTCGTCAGTTGGAACGCCGTTGGTACCGGTGACGGTGGTCATTTTCAGTGGATGT  
AGAGGTAA

TTTTATTGAAATCGAATCCGAGTAGGTTCTTAGCAATGCTCAATGAAGTGTGTTGAAGCGTCCTTGTTTAAAC  
GATGACAATGACATGGTTGCATCAGTTGGAGAAGCAGAATTGGTAAGTAGGCAATATGTTATTGATCTACT  
ATTGGATG

TCCTGACTTGTGTTGCACTGGTAACAGGTGGTAATGATGAAGTAATTTCTGACTTGTGTTGTACTGGT  
AACAGGTGGTAATGATGAAGCAGTTTCTGGCTTGTGTTGCAGTGGTAATAGGTGGTAATGATGAAGACG  
AATATGTA

CAGAATCGAGGCAACAAACAACGCTAGTTACTGTTACTTCCTGCGAATCTGGTGTGTGTTCCGAAACTGCT  
TCACCTGCCATTGTTTCGACGGCCACGGCTACTGTGAATGATGTTGTTACGGTCTATCCTACATGGAGGCC  
ACAGACTG

CGGTGGTCATTTTCAGTGGATGTAGAGGTAAAAGTGTGTTCCATGGCTGAGTTGTAGTCATGGCAGTAGTG  
GCTGTTGTTGGTGTCTGATGACAATGATGGTCTCATCAGTTGGCAAACCGTTGGTACCGGTGACGGTGGT  
GATTTTCAG

CGGTGGTCATTTTCAGTGGATGTAGAGGTAAAAGTGTGTTCCATGGCTGAGTTGTAGTCATGGCAGTAGTG  
GCTGTTGTTGGTGTCTGATGACAATGATGGTCTCATCAGTTGGCAAACCGTTGGTACCGGTGACGGTGGT  
GATTTTCAG

CCGCCAACGGCTTCGGCATCGGCTACATCATCAGAGACCACTCCGTCTCTGTGGTGGTGTCTCAAGGCAT  
CGCCAGACTGCTCGGTTTTCGTCGCTCATGGAAAAGTCGCTGCTGGAGATCGACCGCATCTTCAAACGGCA  
GCAAGCTC

TGGAAAGTGTCTAGAAGATTACCAAGAACCACGTTATTTGAGAGAGGATGGCAAGGTGACGACAATCACAC  
CAAGACCACATTTTGGGTGCGCCTGGAAGCAAGACCTGAGAAACTGGGCCAAAATATTTCAAACCAAGCATA  
AGATAGTT

CCTCTATCTCTGGTGTCTCAAACCTCCACTACAGCATCTGGTTCAATCGCTTCTACTGCTTCCACCGCTTCC  
ACTACTTCTACTGCATCCGCTGCATCCGCCACCAGCTTACCTCAGGTTCCGCTTCTGTCTACACTACTAC  
ATTAACTT

CTGGTTGGCTTCGTCCTTGCCATTAGCAAACAGCTCTATCTTGGGAGTCAATGGTGTAGAAACTGCACTGT  
TAGTTGCCGTGCCTGAGGGAGTGCTATCTCCCGTAGGTTGTTGTTTCTTTGCTGTCTTGCTGTGCGGTGAGA  
GTGTCGGC

GCTCAGTTGTAGTTATGATGGTGCTAGCAGTTGTTGGAGTTCTGATGACAATGACGGTTTTCGTCAGTTGGA  
ACGCCGTTGGTACCGGTGACGGTGGTCATTTTCAGTAGATGTAGAAGTGAAAGTACCGGTCCATGGTTCCGT  
TGTAGTTA

GAAATTGAAGAGGTGACTACTGTTTTTCGTCTCAGCAGCTCCAGTACTGGTAGTTGTCTCAGCAGCTCCAGT  
ATTGGTTGTTGTCTCACTGGTAGCACTGTTTCAATTTAGAGCTGACAGACTGTTTCAATCGTAGTCTGTGGCC  
TCCATGTA

TGAAGGTTGGCGACCACGTGGTCTGTTGATGCTGCCAGCAGTTGTGCGGACCTGCATTGCTGGCCACACTCC  
AAATTTTACAATTTCAAACCATGTGATGCTTGTGTCAGAGGGGCAGTGAAAATCTATGTACCCACGCCGTTTT  
TGTAGGAC

TTTCTGCTGGTGAACGAGTGGGGACAGTTCAATTCTGTGGTAACAAGGCCACAATTGGTGGTGGACCGTGA  
CCGACACGCAAAGCTGGAGCTTAATATGGATGTGACATTTCCATCGATGCCATGTGACCTGGTGAATCTCG  
ATATTATG

TCATCTAGCGCCTCTATCTCTGGTGTCTCAAACCTCCACTACAGCATCTGGTTCAATCGCTTCTACTGCTTC  
CACCGCTTCCACTACTTCTACTGCATCCGCTGCATCCGCCACCAGCTTACCTCAGGTTCCGCTTCTGTCT  
ACACTACT

CAGGTACCGATGTGATTTGCCAGCTTTGTCTGAAAAGGACAAGGAAGATTTGAGATTCGGTGTCAAGAAC  
GGTGTCCACATGGTCTTCGCTTCTTTTCATCAGAACCGCCAACGATGTTTTGACCATCAGAGAAGTCTTGGG  
TGAACAAG

CCTTCGCCAGGGAAGTTTTCCCAACCTACAAGATCTCCTAAAGAAACAATTCCAGCCGCTAGACGACCCAA  
ACGTCCAACAAGTGTCCATCTCATGCTCCACTATGCCGTGCAAGTCGCCCCATGGCTGTCTATAAAGGAA  
ATCGTCCA

CCCCAGACTCAATAATTCCTTCATCTAGCGCCTCTATCTCTGGTGTCTCAAACCTCCACTACAGCATCTGGT  
TCAATCGCTTCTACTGCTTCCACCGCTTCCACTACTTCTACTGCATCCGCTGCATCCGCCACCAGCTTCA  
CTCAGGTT

GTTCCAGCACCAACTGCTACCGACGCAACTGCAACCGTTTTCTCCAAGTCATACACCCTGTTACTGTTAC  
TCACTGTGACAACAATGGCTGTAACACCAAGACTGTCACTTCTGAATGTTCTAAAGAACTGCAGCAACCA  
CCATTTCT

GAGTCTGTGATCAAGAAATGTTCTTCTACGGTGATTTGGTCACTTCGCAAATGAAGAAATGGGGTGTGCA  
AGTGGAAAGGCGATAACTCTGAGTTGGACCTGATGAACCTTGGGGAAGACGATGACGACGACAATGATGATG  
GCAATAAC

GGGGATAGATGGTTGTTGGGGTGTGGTGATGGATAGTGAGTGGATAGTGAGTGGATGGATGGTGGAGTGGG  
GGAATGAGACAGGGCATGGGGTGGTGAGGTAAGTGCCGTGGATTGTGATGATGGAGAGGGAGGGTAGTTGA  
CATGGAGT

AATGGCTGGAGAAGCAGTCTTAGAGCATAACGTCAGATTCACAAGAAGAAATTGTAACACTGTGGTTTTGTT  
TTGTTGTTTTCTGTGGTTTTGCTCTGTTGTCCCCTTGGTTTTGCTTTGTTGTCTCCGTAGTTTGCTTTGTTATC  
TCTGTGGT

ATTGTCATCAGAACACCAACAACAGCCACTACTGCCATGACTACAACCTCAGCCATGGAACGACACTTTTTAC  
CTCTACATCCACTGAAATCACCACCGTCACCGGTACCAATGGTTTTGCCAACTGATGAGACCATCATTGTCA  
TCAGAACA

CAGTTTGACACAGCTGCAGGTATCTTCCACTCATTGGATCAGCTTCTCCCCTATCATTGCTGCCATCCAT  
ATGGAGAACAGGCACGACTTCGTCTGTTTTCTGTGGGTGCTACAACCTTCTCGCCTTCTTCCCAACGAACC  
TTGGCAAC

ATCCGTGTACCTCGAAGCAACGATAGACAATCCGGTGATCAGTTTTCGTGCTGTCCATTTGCAAGATGGCCT  
CTGTGGACAGCTTGATAAGTATGTCATTGGGTAGCTGGGTACATCCTGGTTGGAGTTGCAACTGTTTCATC  
AATGAGTA

AACCAACTGACGAAACCGTGATTGTTATCAGAACTCCAACCAGTGAAGGTTTGGTTACAACCACCACTGAA  
CCATGGACTGGTACTTTTACTTCGACTTCCACTGAAATGTCTACTGTCACTGGAACCAATGGCTTGCCAA  
TGATGAAA

TTGAGATTCCGGTGTCAAGAACGGTGTCCACATGGTCTTTCGCTTCTTTTCATCAGAACCGCCAACGATGTTTT  
GACCATCAGAGAAGTCTTGGGTGAACAAGGTAAGGACGTCAAGATCATTGTCAAGATTGAAAACCAACAAG  
GTGTTAAC

CCTCAGCCATGGAACGACACTTTTACCTCTACATCCACTGAAATGACCACCGTCACCGGTACCAACGGTTTT  
GCCAACTGATGAAACCATCATTGTCATCAGAACACCAACAACAGCCACTACTGCCATAACTACAACCTGAGC  
CATGGAAC

ACTCAGCCATGGAACGACACTTTTACCTCTACATCCACTGAAATGACCACCGTCACCGGTACCAACGGTTTT  
GCCAACTGATGAAACCATCATTGTCATCAGAACACCAACAACAGCCACTACTGCCATGACTACAACCTCAGC  
CATGGAAC

AAGTGTGCTTCCATGGCTGAGTTGTAGTCATGGCAGTAGTGGCTGTTGTTGGTGTCTGATGACAATGATG  
GTCTCATCAGTTGGCAAACCATTTGGTACCGGTGACTGTGGTCAATTCCGGTAGAAGTAGAGGTAAAAGTGTC  
GTTCCATG

TGGCATCTAGTTCTTCATATACGGCACCTCCCCTGAACGAAGATGGTCCTAAAGGGGTAGCTTCTGCAGTG  
TCACAAGGCTCCGAATCCGTAGTCTCATGGACAACCTTAAACACACGTATATTCCATCCTGGGTGCTTATGG  
AGGGCCCA



GATGGAGAGTGCCATAAATTATCCAACGCTGCTTTACCTCTGGCAATGGGCCATGAGATGTCAGGAATTGT  
TTCCAAGGTTGGTCCTAAAGTGACAAAGGTGAAGGTTGGCGACCACGTGGTCGTTGATGCTGCCAGCAGTT  
GTGCGGAC

GTAGAAGAGAACGAACCTGAATGTGAATGGTGTGATGCAGAGTCTGGGGTCGTCATTGAACTTGAAGTCTT  
GTAAGGGGAATTGAATGGAGATGGAGAGGATGAAGATGAGGTTGGAGTGAAGGCAAATGGTGGAGAAATGC  
TATCTTTG

ACCAATGGTTTTGCCAACTGATGAGACCATCATTGTCATCAGAACACCAACAACAGCCACTACTGCCATGAC  
TACAACCTCAGCCATGGAACGACACTTTTACCTCTACTTCTACCGAATTGACCACAGTCACCGGTACCAATG  
GTTTGCCA

ATAAAACATCATCACAATGTCTAGATTAGAAAGATTGACCTCATTAAACGTTGTTGCTGGTTCTGACTTGA  
GAAGAACCTCCATCATTGGTACCATCGGTCCAAAGACCAACAACCCAGAAACCTTGGTTGCTTTGAGAAAG  
GCTGGTTT

GTTGTACTGATAACAGGTGGTAATGATGAAGTAATTTCTGACTTGTGTGCGACTGGTAACAGGTGGTAA  
TGAAGAAGTAATTTCTGACTTGTGTTGTACTGGTAACAGGTGGTAATGATGAAGTAATTTCTGACTTGTG  
TTGTTGTA

ACGGCACCTCCCCTGAACGAAGATGGTCCTAAAGGGGTAGCTTCTGCAGTGTCAACAAGGCTCCGAATCCGT  
AGTCTCATGGACAACTTTAAACACACGTATATTCCATCCTGGGTGCTTATGGAGGGCCACGTGCTTGTATC  
CGACAGCC

ACTGATGAGACCATCATTGTCATCAGAACACCAACAACAGCCACTACTGCCATGACTACAACCTCAGCCATG  
GAACGACACTTTTACCTCTACTTCTACCGAATTGACCACAGTCACCGGTACCAATGGTTTGCCAACCTGATG  
AGACCATC

TGAGCAGTTTTGAGGAGAGGCATGATGGGGGTTCTCTGGAACAGCTGATGAAGCAGGTGTTGTTGTCTGTTG  
AGAGTTAGCCTTAGTGGAAGCCTTCTCACATTCTTCTGTTTTGGAAGCTGAAACGTCTAACGGATCTTGAT  
TTGTGTGG

TGACCATCAGAGAAGTCTTGGGTGAACAAGGTGAAGGACGTCAAGATCATTGTCAAGATTGAAAACCAACAA  
GGTGTTAACAACCTTCGACGAAATCTTGAAGGTCACTGACGGTGTTATGGTTGCCAGAGGTGACTTGGGTAT  
TGAAATCC

ATGTGAATGGTGTGATGCAGAGTCTGGGGTCGTCATTGAACTTGAAGTCTTGTAAAGGGGAATTGAATGGAG  
ATGGAGAGGATGAAGATGAGGTTGGAGTGAAGGCAAATGGTGGAGAAATGCTATCTTTGGTCAACCTTCTT  
AAATGAGT

CCATCATTGTCATCAGAACACCAACAACAGCCACTACTGCCATGACTACAACCTCAGCCATGGAACGACACT  
TTTACCTCTACATCCACTGAAATGACCACCGTCACCGGTACCAACGGCGTTCCAACCTGACGAAACCGTCAT  
TGTCATCA

TGTCGATTTGCCAGCTTTGTCTGAAAAGGACAAGGAAGATTTGAGATTCGGTGTCAAGAACGGTGTCCACA  
TGGTCTTCGCTTCTTTTCATCAGAACCGCCAACGATGTTTTGACCATCAGAGAAGTCTTGGGTGAACAAGGT  
AAGGACGT

GTAAGAGCGCCTGGTTGGCTTCGTCCTTGCCATTAGCAAACAGCTCTATCTTGGGAGTCAATGGTGTAGAA  
ACTGCACTGTTAGTTGCCGTGCCTGAGGGAGTGCTATCTCCCGTAGGTTGTTGTTTCTTTGCTGTCTTGCT  
GTCGGTGA

GTAAGAGCGCCTGGTTGGCTTCGTCCTTGCCATTAGCAAACAGCTCTATCTTGGGAGTCAATGGTGTAGAA  
ACTGCACTGTTAGTTGCCGTGCCTGAGGGAGTGCTATCTCCCGTAGGTTGTTGTTTCTTTGCTGTCTTGCT  
GTCGGTGA

GTAAGAGCGCCTGGTTGGCTTCGTCCTTGCCATTAGCAAACAGCTCTATCTTGGGAGTCAATGGTGTAGAA  
ACTGCACTGTTAGTTGCCGTGCCTGAGGGAGTGCTATCTCCCGTAGGTTGTTGTTTCTTTGCTGTCTTGCT  
GTCGGTGA

GTAAGAGCGCCTGGTTGGCTTCGTCCTTGCCATTAGCAAACAGCTCTATCTTGGGAGTCAATGGTGTAGAA  
ACTGCACTGTTAGTTGCCGTGCCTGAGGGAGTGCTATCTCCCGTAGGTTGTTGTTTCTTTGCTGTCTTGCT  
GTCGGTGA

CATGACTACACCTCAGCCATGGAACGACACTTTTACCTCTACATCCACTGAAATGACCACCGTCACCGGTA  
CCAACGGTTTGCCAACTGATGAAACCATCATTGTCATCAGAACACCAACAACAGCCACTACTGCCATAACT  
ACAACCTGA

CATAACTACAACCTCAGCCATGGAACGACACTTTTACCTCTACATCCACTGAAATGACCACCGTCACCGGTA  
CCAACGGTTTGCCAACTGATGAAACCATCATTGTCATCAGAACACCAACAACAGCCACTACTGCCATGACT  
ACAACCTCA

CGGTCAACCAACTGACGAAACTGTGATTGTTATCAGAACTCCAACCAGTGAAGGTCTAATCAGCACCACCA  
CTGAACCATGGACTGGTACTTTCACTTCTACATCTACTGAAATGACCACCGTCACCGGTACTAACGGTCAA  
CCAACCTGA

CACTGAGATGACCACCGTCACCGGTACTAACGGTCAACCAACTGACGAAACCGTGATTGTTATCAGAACTC  
CAACCAGTGAAGGTTTGGTTACAACCACCACTGAACCATGGACTGGTACTTTTACTTCTACATCTACTGAA  
ATGACCAC

CCTATCATTGCTGCCATCCATATGGAGAACAGGCACGACTTCGTCGTTTTTCTGTGGGTGCTACAACCTTTC  
TCGCCTTCTTCCCAACGAACCTTGGCAACAATGGATCCATTTGCTTGGACACTACCTCAATATGGTGGCTG  
TTGTTCAA

TTGGGCATGACCATTCTGTTTTCAATGTCGTCATCTTCGTCGATGCTGTACTGAGACAGTTTCTTGTGTTG  
TAAGAGCGCCTGGTTGGCTTCGTCTTGCATTAGCAAACAGCTCTATCTTGGGAGTCAATGGTGTAGAAA  
CTGCACTG

TTGCTCGAAATCCTGGATGAAGAAGCCAAGCAGTTCTTCACGAATCAGGTCACTGGCCTCTTGTGCTTCGA  
TTCCTCTCGTAACCAATCTGATTAAGACGTGTAACCATGACGAGGAGTCGTCATCGTCCAGTAATATGGAG  
GAGGAAGA

CAGCATCTGGTTCAATCGCTTCTACTGCTTCCACCGCTTCCACTACTTCTACTGCATCCGCTGCATCCGCC  
ACCAGCTTACCTCAGGTTCCGCTTCTGTCTACACTACTACATTAACCTTACTTGAATGCCACAAGTACAGT  
CGTGGTTT

AATTGAAGAGGTGACTACTGTTTTCGTCTCAGCAGCTCCAGTACTGGTAGTTGTCTCAGCAGCTCCAGTAT  
TGGTTGTTGTCTCACTGGTAGCACTGTTTCAATTTAGAGCTGACAGACTCTTCATTTCGTAGTCTGTGGCCTC  
CATGTTGG

AAGAGTACGTAAAAACAGGTACTGTGCATGGTTTGAACAACCTCAAGGACTTAAAGAATCTCAAGAGTTC  
CCAGAACCAATCTTACCCCATCGACCAAGGCTGAACAAGGTGAACATGACGAAAACATCTCTCTGCCCA  
GGCCGCTG

TAGTGTTGACATAAGGTGTTGTAGGATAAGACGGTGAACGTCTCTTGGCTAAATCGGTGGCCAGATGCTC  
AGTGGATTGCTGCAAAGAATCGTACTCCCTCTGTGGTTCCCATCGGTATTGATTTTCGATGAACCTACGTT  
CATGCGGT

TACAACCACCACTGAACCATGGACTGGTACTTTTACTTCTACATCTACTGAAATGACCACCATTACTGGAA  
CCAACGGCGTTCCAACCTGACGAAACCGTCATTGTCATCAGAACTCCAACCAGTGAAGGTCTAATCAGCACC  
ACCACTGA

TGCAGTGGTAATAGGTGGTAATGATGAAGACGAATATGTAGACTTTGGTGATTTCAGAAGAGATAGAAGAGG  
AAGAAGAGACAGAAGTACTGAACTAGTTTTCGCTCTCAGAAGAACCAGAGGTGGAACCTACTGGTTGGAATG  
ACGGATGA

CATCAGAACACCAACAACAGCCACTACTGCCATGACTACAACCTCAGCCATGGAACGACACTTTTACCTCTA  
CTTCTACCGAATTGACCACAGTACCGGTACCAATGGTTTGGCCAACTGATGAGACCATCATTGTCATCAGA  
ACACCAAC

ATTTCTCTACGGTACCATCGGCAGGCTGGTAGATCTCGGAGGCTGACTTGACGGACTCAATGGACCCTAG  
CGACTCACCTTGGGCAATCTCAGTGCCCACTTCTGGCAACTCAACATAGGTAGCGTCCCCTAAGGCATCAG  
TGGCGTAT

CCTCTACATCCACTGAGATGACCACCGTCACCGGTACTAACGGTCAACCAACTGACGAAACCGTGATTGTT  
ATCAGAACTCCAACAGTGAAGGTTTGGTTACAACCACCACTGAACCATGGACTGGTACTTTTACTTCTAC  
ATCTACTG

TGGGGTGGCATAGTGTGGACATAAGGTGTTGTAGGATAAGACGGTGAACGTCCTCTTGGCTAAATCGGTGG  
CCAGATGCTCAGTGGATTGCTGCAAAGAATCGTACTCCCTCTGTGGTTCCCATCGGTATTGATTTGATG  
AACCTACG

CTGGTTGGAATGACGGATGATTTAAATGATTAGAGAAATATAGAAGTGGAGGTTGTTGTAGAAGAAATGAC  
AGGGGAAGAAATGAATGAAGAAGAAATGACTGGAGAAGAAGTACTAGAGAAGAAGTACTGAGGAAGAAA  
TGACTAGA

TGTTGTTGTACTGGTAACAGGTGGTAATGAAGAAGTAATTTCTGACTTGTGTTGCACTGGTAACAGGTG  
GTAATGATGAAGTAATTTCTGACTTGTGTTGTACTGGTAACAGGTGGTAATGATGAAGCAGTTTCTG  
CTTGTGTTGT

ACTTGAGATTTGTCCAATTTAGCATCTCTCAAGACCTTTTCAACTGGGTCCAAAGTAGATCTGAACAAGTC  
AGCACACAATTTCTCGAATCTGGCTCTGGTGATGGAAGTGTAGAAATCGATACCTTCGAACAAAGAGTCAA  
TTTCAACG

TGATCTTCTAAACACCTTCGCAAGGTGCCTTTTAAACGTGTTTCGTACTGTGCAGCGGTACAGCACGTTCC  
TCTGACACAAACGACACTACTCCGGCGTCTGCAAAGCATTTCGAGACCCTTCTTTATTGACGTGTATGGA  
CAATTCGC

GAGGTGCTGGAGGTGCTGGAGGTGTTGGAGGTACTGGAGGTATTGAAGGTGCTGAGAGTCTGGAGGTGCT  
GAAGATACTGGAGGTACTGGGGGTACTGGGGGTACTGAAGGTGCAGAGAGTCTGGAGGTGCTGGAGGTAC  
TGGAGGTG

AGGTGCTGGAGGTGTTGGAGGTACTGGAGGTATTGAAGGTGCTGAGAGTCTGGAGGTGCTGAAGATACTG  
GAGGTACTGGGGGTACTGGGGGTACTGAAGGTGCAGAGAGTCTGGAGGTGCTGGAGGTACTGGAGGTGCA  
GAGGGTAC

GCTGAGAGTCTGGAGGTGCTGAAGATACTGGAGGTACTGGGGGTACTGGGGGTACTGAAGGTGCAGAGAG  
TGCTGGAGGTGCTGGAGGTACTGGAGGTGCAGAGGGTACTGAAGGTGCAGAGGGTACTGGAGGTGCAGAGG  
GTGCAGAA

AGAGGCGCTGGAGGTGCTGGAGGTGCTGGAGGTGTTGGAGGTACTGGAGGTATTGAAGGTGCTGAGAGTGC  
TGGAGGTGCTGAAGATACTGGAGGTACTGGGGGTACTGGGGGTACTGAAGGTGCAGAGAGTCTGGAGGTG  
CTGGAGGT

GTAAGGTGCTGAGAGTCTGGAGGTGCTGAAGATACTGGAGGTACTGGGGGTACTGGGGGTACTGGGGGTACTGGG  
GGTACTGAAGGTGCAGAGAGTCTGGAGGTGCTGGAGGTACTGGAGGTGCAGAGGGTACTGAAGGTGCAGAG  
GGTACTG

TATTGAAGGTGCTGAGAGTCTGGAGGTGCTGAAGATACTGGAGGTACTGGGGGTACTGGGGGTACTGAAG  
GTGCAGAGAGTCTGGAGGTGCTGGAGGTACTGGAGGTGCAGAGGGTACTGAAGGTGCAGAGGGTACTGGA  
GGTGCAGA

TGCGAGCTTGCTAATGGATAATCAGCGTGCTAACGCTGGGTCTACATCCGTTCCACAAACATTCTCCCC  
CTAGGGGTAGGTGCAAGTCAAGTGGTGGAGACTAACCTGTCTAACGTTGAGGCTGACTCCGGACATCATCAC  
CACCACCG

ACTCCGTAGCTGCGAGCTTGCTAATGGATAATCAGCGTGCTAACGCTGGGTCTACATCCGTTCCCACAAAC  
ATTCCCTCCCCCTAGGGGTAGGTTCGAAGTCAGTGGTGGAGACTAACCTGTCTAACGTTGAGGCTGACTCCGG  
ACATCATC

AAACGATAAGGGACGCCGTCACTCCGTAGCTGCGAGCTTGCTAATGGATAATCAGCGTGCTAACGCTGGGT  
CTACATCCGTTCCCACAAACATTCCCTCCCCCTAGGGGTAGGTTCGAAGTCAGTGGTGGAGACTAACCTGTCT  
AACGTTGA

CTGGAGGTGCTGAAGATACTGGAGGTACTGGGGTACTGGGGTACTGAAGGTGCAGAGAGTGCTGGAGGT  
GCTGGAGGTACTGGAGGTGCAGAGGGTACTGAAGGTGCAGAGGGTACTGGAGGTGCAGAGGGTGCAGAAGG  
CACTGGGT

GGTGTGGAGGTACTGGAGGTATTGAAGGTGCTGAGAGTGCTGGAGGTGCTGAAGATACTGGAGGTACTGG  
GGTACTGGGGTACTGAAGGTGCAGAGAGTGCTGGAGGTGCTGGAGGTACTGGAGGTGCAGAGGGTACTG  
AAGGTGCA

TAACGTCAATAACACGAGATGCTGACGATGTGACAGAAGTAGCTGTAGATTGAGCTTTGGAGGAGACTGGC  
TTAGTCACAGTTGAACAGACGTTATTTGAACAACACTAGTTATGGTAGTTTCAACAGTGGAAAGCTTGAGTCTT  
TGTGACGG

TGAAGATACTGGAGGTACTGGGGTACTGGGGTACTGAAGGTGCAGAGAGTGCTGGAGGTGCTGGAGGTA  
CTGGAGGTGCAGAGGGTACTGAAGGTGCAGAGGGTACTGGAGGTGCAGAGGGTGCAGAAGGCACTGGGTGA  
GGTGGCAC

AACACGAGATGCTGACGATGTGACAGAAGTAGCTGTAGATTGAGCTTTGGAGGAGACTGGCTTAGTCACAG  
TTGAACAGACGTTATTTGAACAACACTAGTTATGGTAGTTTCAACAGTGGAAAGCTTGAGTCTTTGTGACGGT  
CTGTCAGT

TGAAGTTGCCTTTGAAATTATTGACGGCACCGGTAAGTATGTCACTCCAGGTCTGATCGACAGTCATGTCC  
ACATTGCGTTCGGTTGCAGGAGAGGCTGATCTGACCAAGTTAATGCTGATGCCAAAGTCAGTTGCATTACTC  
AGAATAAG

GGAGGTACTGGGGTACTGGGGTACTGAAGGTGCAGAGAGTGCTGGAGGTGCTGGAGGTACTGGAGGTGC  
AGAGGGTACTGAAGGTGCAGAGGGTACTGGAGGTGCAGAGGGTGCAGAAGGCACTGGGTGAGGTGGCACCT  
TGTCTCA

GTTAACCACACTAAATACACTCCAGACAAGAAGATTGTCTCCAACGCTTCTTGTACCACCAACTGTTTGGC  
TCCATTGGCCAAGGTTATCAACGATGCTTTCCGGTATTGAAGAAGGTTTGTGATGACCACTGTTCACTCCATGA  
CCGCCACT

AGTCGACAACTCTGGTAGAGTAACCGTATTTCGTTGTCGTACCAGGAAACCAACTTGACGAACTTTGGAGAC  
AATTGGATAACCAGCGGCAGCATCGAAGATGGAAGAGTTAGAGTCACCCAAGAAGTCAGAGGAGACAACAGC  
GTCTTCAG

GGACGCCGTCACTCCGTAGCTGCGAGCTTGCTAATGGATAATCAGCGTGCTAACGCTGGGTCTACATCCGT  
TCCCACAAACATTCCCTCCCCCTAGGGGTAGGTTCGAAGTCAGTGGTGGAGACTAACCTGTCTAACGTTGAGG  
CTGACTCC

CATAATCGCACTTAAATACGCAAAATATACAAGATAGCCCTACAACCTGCTCCATGGACTCCAAGGACACGC  
AAAAGTTGCTTAAAGGAGCACCGAATCCCTGCATCGACGTTGGATGGTTGGTCAGGCCAGTGCCTCCACC  
AGCAAGAG

TAACCGTTGATGAAGTTGCCTTTGAAATTATTGACGGCACCGGTAAGTATGTCACTCCAGGTCTGATCGAC  
AGTCATGTCCACATTGCGTTCGGTTGCAGGAGAGGCTGATCTGACCAAGTTAATGCTGATGCCAAAGTCAGT  
TGCATTAC

CTTGGAACGTGTTCAACCAAGTCGACAACCTCTGGTAGAGTAACCGTATTTCGTTGTCGTACCAGGAAACCA  
ACTTGACGAACCTTGGAGACAATTGGATACCAGCGGCAGCATCGAAGATGGAAGAGTTAGAGTCACCCAAG  
AAGTCAGA

TCTGGTAGAGTAACCGTATTTCGTTGTCGTACCAGGAAACCAACTTGACGAACCTTGGAGACAATTGGATAC  
CAGCGGCAGCATCGAAGATGGAAGAGTTAGAGTCACCCAAGAAGTCAGAGGAGACAACAGCGTCTTCAGTG  
TAACCCAA

TTGACGGCACCGGTAAGTATGTCCTCCAGGTCTGATCGACAGTCATGTCCACATTGCGTCGGTTGCAGGA  
GAGGCTGATCTGACCAAGTTAATGCTGATGCCAAAGTCAGTTGCATTACTCAGAATAAGATACACTTTGGA  
AGCCGCTC

TTCTTTCTTCAAACGATAAGGGACGCCGTCCTCCGTCAGCTGCGAGCTTGCTAATGGATAATCAGCGTGCT  
AACGCTGGGTCTACATCCGTTCCACAAACATTCTCCCTTAGGGGTAGGTCGAAGTCAGTGGTGGAGAC  
TAACCTGT

TTTGAAATTATTGACGGCACCGGTAAGTATGTCCTCCAGGTCTGATCGACAGTCATGTCCACATTGCGTC  
GGTTGCAGGAGAGGCTGATCTGACCAAGTTAATGCTGATGCCAAAGTCAGTTGCATTACTCAGAATAAGAT  
ACACTTTG

CTGACCAAGTTAATGCTGATGCCAAAGTCAGTTGCATTACTCAGAATAAGATACACTTTGGAAGCCGCTCT  
GGCAAGAGGTTTACAACAGTGAGAGACTGTGGGGTGCAGAAGGCTTTCTGAAAGCAGAGATTTCGTCAGG  
GATCCTTG

TGTTGTTGGTGTAAACCACACTAAATACACTCCAGACAAGAAGATTGTCTCCAACGCTTCTTGTACCACCA  
ACTGTTTGGCTCCATTGGCCAAGTTATCAACGATGCTTTCCGTTATTGAAGAAGGTTTGTGACCCTGTT  
CACTCCAT

TTGACGCTATCACCAACACTGGTCCAAGAGAAGACACCACCAGAGTCGGTGGTGGTGGTGGTGGTGGTGGT  
CAAGCTGTGATGTTTTCTCCATTGAGAAGAGTTAACCAAGCTATTGCTTTGTTGACCATTGGTGCCAGAGA  
AGCTGCTT

AAATTTAAGCCTTGGCAACGTGTTCAACCAAGTCGACAACCTCTGGTAGAGTAACCGTATTTCGTTGTCGTAC  
CAGGAAACCAACTTGACGAACCTTGGAGACAATTGGATACCAGCGGCAGCATCGAAGATGGAAGAGTTAGA  
GTCACCCA

CAGGCACTCGCATAATCGCACTTAAATACGCAAAATATACAAGATAGCCCTACAACCTGCTCCATGGACTCC  
AAGGACACGCAAAAGTTGCTTAAAGGAGCACCGAATCCCTGCATCGACGTTGGATGGTTGGTCAGGCCAG  
TGCTTCCA

GACAGAGAAATAATCTTTGTCAATGGTGACACTTTGAATTCATCATAACCGTCTGGGATTTTATGTATTA  
AGATTTCTTTGCCTTTTAGATTTGATAAATATGCGCCGATATTAGACGTGTGTGTGTGTGTGTGTGTGTG  
TGTGTGTG

TGACAGAAGTAGCTGTAGATTGAGCTTTGGAGGAGACTGGCTTAGTCACAGTTGAACAGACGTTATTTGAA  
CAACTAGTTATGGTAGTTTCAACAGTGGAAGCTTGAGTCTTTGTGACGGTGTGTGTGTGTGTGTGTGTGTG  
CACTGGAG

TGAAAGTCGTTGGGAGTATGATTTGAATCGCTATGTAAAGGAAATCTTTTGAATGAGTTGCAATATATCG  
ATAAGGATTATTTTCATCCAAGAAATGAACAGAAGGTTGCAATCTAACAAACAGGAGATTTGGGAAGAGATC  
ACAAATAG

TTCAATGGAAGAAGGAATCTCAGAAGAGGAAGTAATTACACTAGAAACTATTAGTTCACTGGAAATGGTGA  
TTTGATTAGAGGAGATAGATTTCTGCGGAAGTGGTTGCTTTACTGAAAGAGAGAGGTTTCAGCAGAAGAGGTG  
ATTTCACT

TTCATTTCTTGATGAAACTCATGGATACGTGGTCCGTTTCATTGTGAAAGGATCACTGAGTTGCCACTTTGA  
GTTTTCGTCAATCACAGGAGCGTCTGGTAGACCAGCAACCTTGGAGTACAAGCTTCCACATCAATTCTAA  
AGCCGTCT

GCTGACGATGTGACAGAAGTAGCTGTAGATTGAGCTTTGGAGGAGACTGGCTTAGTCACAGTTGAACAGAC  
GTTATTTGAACAACACTAGTTATGGTAGTTTCAACAGTGGAAAGCTTGAGTCTTTGTGACGGTGCTGTCTAGTAC  
CATTTTGG

TGTTCAACCAAGTCGACAACCTCTGGTAGAGTAACCGTATTTCGTTGTCTGACAGGAAACCAACTTGACGAA  
CTTTGGAGACAATTGGATACCAGCGGCAGCATCGAAGATGGAAGAGTTAGAGTCAACCAAGAAGTCAGAGG  
AGACAACA

TCATTGACTTGCTGCTGAATGTAGCCCAGGACATAGATTCCAACGATCTTTCGGAGCACGATTCTCTGGCTG  
CAGCAGTTCATCCAACATAATAACACGATTTCGTTTCATGGGCGATGACACCTGGCTGAAACTGTTCCACA  
GCAATGGT

TGTGGGACTATGCTTTCTGTGGGCTCTAATTATCATCGTTGGCATGTTATTAGTTCCAGAGTCCCCAAGAT  
ATCTGATTGAATGTGAGAGACATGAAGAGGCCTGTGTCTCCATCGCCAAGATCGACAAGTTTCCACAGAG  
GATCCATG

TCCAGCAGCATTCTTTCTTCAACGATAAGGGACGCCGCTCACTCCGTAGCTGCGAGCTTGCTAATGGATAA  
TCAGCGTGCTAACGCTGGGTCTACATCCGTTCCACAAACATTCTCCCCCTAGGGGTAGGTCGAAGTCAG  
TGGTGGAG

GTTGCATTACTCAGAATAAGATACACTTTGGAAGCCGCTCTGGCAAGAGGTTTCAACAACAGTGAGAGACTG  
TGGGGGTGCAGAAGGCTTTCTGAAAGCAGAGATTTCGTGAGGGATCCTTGAATGGTCCCAGATTAATTACGT  
GTGGACAT

GTACATACATATACACCACTCAGGCACTCGCATAATCGCACTTAAATACGCAAAATATACAAGATAGCCCT  
ACAACCTGCTCCATGGACTCCAAGGACACGCAAAAGTTGCTTAAAGGAGCACCGAATCCCCTGCATCGACGTT  
GGATGGTT

CCTTATTATCATCGGCACCTTCTTCCCTCACTTCGGGTCTCCACCCAGCACCACTCATGAGGCAAAGCGTC  
CACACCATGGAAGGTCATGCACTCACCAAAATGTGAGAAGATTGAACCATTAAGTCCATCATTCAA  
CATTCCGT

ATACACCACTCAGGCACTCGCATAATCGCACTTAAATACGCAAAATATACAAGATAGCCCTACAACCTGCTC  
CATGGACTCCAAGGACACGCAAAAGTTGCTTAAAGGAGCACCGAATCCCCTGCATCGACGTTGGATGGTTGG  
TCAGGCC

GGAGGATTCCTGTGGGACTATGCTTTCTGTGGGCTCTAATTATCATCGTTGGCATGTTATTAGTTCCAGAG  
TCCCCAAGATATCTGATTGAATGTGAGAGACATGAAGAGGCCTGTGTCTCCATCGCCAAGATCGACAAGGT  
TTCACAG

GGTGTAGAAAATATTACTGAAGTGGACAAGACATTTGAGGATGTGCACGTTTCTGATAAGTCAATGATCTG  
GAATTCTGATCTCGTAGAACTCTGGAATTGCAAAATTTACTTACTTGTGCCACACAAACGGCTGTTTCTG  
CTTCCAAA

TGGATGGTGGTTGGGAGTGGTATAATGAAATGGGACAGGGTAACGAGTGGGGAGGTAGGGTAATGGAGGGT  
ACGTTAAGAGACAGGTTTATCAGGGTTGGATTAGAATAGGGTTAGGGTAGTGTAGGGTAGTGTAGGGTA  
GTGTGGTG

CTAAATACACTCCAGACAAGAAGATTGTCTCCAACGCTTCTTGTACCACCAACTGTTTGGCTCCATTGGCC  
AAGTTATCAACGATGCTTTCCGTTATTGAAGAAGGTTTGTGACCACTGTTCACTCCATGACCGCCACTCA  
AAAGACTG

CAGTGGAGAAGATTTGAGATTTCTTTGTTGGAATAGTAGTGTTCCTTGAATCAATCTTGTGAAAACACCA  
CCTAAAGTTTCGATACCTAGAGACAATGGGGTAACATCTAATAATAAGACGTCAGTAACCTCACCGGACAA  
GACAGCAC

ATGGATACGTGGTCCGTTTCATTGTGAAAGGATCACTGAGTTGCCACTTTGAGTTTTCGTCAATCACAGGAG  
CGTCTGGTAGACCAGCAACCTTGGAGTACAAGCTTCCCACATCAATTCTAAAGCCGTCTACACCATGGTCT  
AACCAGTA

GGTCAAGGTACCAACCATGACCAAACGAGTAGGCAACCCAGCAAAGGAACCGAAAAATCCTAACTGTTTGG  
CCAACTGAGCCAACAAACCGACTGTGGATTGGCCAGGAGCCTTCTTAGTCTTGTGGACCTTGGACAACAGA  
GTGTCTGC

CACATACTTGCTCATCGAGGTTGCGTCTTGGAACTGTCCGACAATGAGGCATACCTGCTCAATTTCTGTG  
GGTCCAGAACTTCTTTCTGAAAAGCGAAGTGGCCTCTTCATAACGATGAGGGTCTGGCTGCTTACCTTGC  
AGGCCTGG

GCCAAAGTCAGTTGCATTACTIONACTCAGAATAAGATACACTTTTGGAAAGCCGCTCTGGCAAGAGGTTTTACAACAG  
TGAGAGACTGTGGGGGTGCAGAAGGCTTTCTGAAAGCAGAGATTTCGTCAGGGATCCTTGAATGGTCCCAGA  
TTAATTAC

TAACCGTATTTCGTTGTCGTACCAGGAAACCAACTTGACGAACTTTGGAGACAATTGGATAACCAGCGGCAGC  
ATCGAAGATGGAAGAGTTAGAGTCACCCAAGAAGTCAGAGGAGACAACAGCGTCTTCAGTGTAACCCAAGA  
CACCTTC

GATGAAACTCATGGATACGTGGTCCGTTTCATTGTGAAAGGATCACTGAGTTGCCACTTTGAGTTTTCGTCA  
ATCACAGGAGCGTCTGGTAGACCAGCAACCTTGGAGTACAAGCTTCCCACATCAATTCTAAAGCCGTCTAC  
ACCATGGT

GATGAACTTGTTTCATTTCTTGATGAAACTCATGGATACGTGGTCCGTTTCATTGTGAAAGGATCACTGAGTT  
GCCACTTTGAGTTTTTCGTCAATCACAGGAGCGTCTGGTAGACCAGCAACCTTGGAGTACAAGCTTCCCACA  
TCAATTCT

GAAGGAATCTCAGAAGAGGAAGTAATTACACTAGAACTATTAGTTCACTGGAAATGGTGATTTGATTAGA  
GGAGATAGATTCTGCGGAAGTGGTTGCTTTACTGAAAGAGAGAGGTTTCAGCAGAAGAGGTGATTTCACTGA  
AAGTAGAC

CAAGTTGTTGTTGACGCTATACCAACACTGGTCCAAGAGAAGACACCACCAGAGTCGGTGGTGGTGGTGC  
TGCTAGACGTCAAGCTGTGCATGTTTCTCCATTGAGAAGAGTTAACCAAGCTATTGCTTTGTTGACCATTG  
GTGCCAGA

CAGAAACAAAAGGCCTGACGCTGGAGGAGGTGAATACTATGTGGCTGGAAGGTGTGCCAGCATGGAAATCA  
GCCTCATGGGTGCCACCAGAAAGAAGAACCGCAGATTACGATGCTGACGCCATAGACCATGACGATAGACC  
AATCTACA

TTCTTTGTCCCAGAAACAAAAGGCCTGACGCTGGAGGAGGTGAATACTATGTGGCTGGAAGGTGTGCCAGC  
ATGGAAATCAGCCTCATGGGTGCCACCAGAAAGAAGAACCGCAGATTACGATGCTGACGCCATAGACCATG  
ACGATAGA

ACTAAGACTACCGCTGCTGTCTCTCAAATTTGGTGATGGTCAAGTTCAAGCTACCACCAAGACTACTGC  
TGCCGCCGTTTCTCAAATCGGTGATGGTCAAGTTCAAGCTACTACCAAGACTACCGCTGCTGTCTCTC  
AAATCGGT

TAGTGCTTGGTCAATTCATCGATTTGGATCTTACCGAATTCACCAACGTAACCGATCTTCTTACCCTTTAG  
GGACTGGAAGTCTTCAGTGATACCACTGCCCTTTAAGTACAAGACACCGGTGAATGGTTTCGTCCAACAAAG  
AGGCAACA

GGAAGAGTTAGAGTCACCCAAGAAGTCAGAGGAGACAACAGCGTCTTCAGTGTAACCCAAGACACCCTTCA  
ACTTACCTTCAGCGGCAGCCTTGACAACCTTCTTGATTTTCATCGTAGGTGGTTTCCTTGTTCAACTTGACA  
GTCAAGTC

TCGAAACGTCTGTAGACTCTTCCAGCAGCATTCTTTCTTCAAACGATAAAGGGACGCCGTCCTCCGTAGCT  
GCGAGCTTGCTAATGGATAATCAGCGTGCTAACGCTGGGTCTACATCCGTTCCACAAACATTCTCCCCC  
TAGGGGTA

TCTTCGCCGGCCTGTTTTGCCAAACATCTTCTTCCCCATAAACTGGAGGTTCTCCGTGTCCAGCATTTCGAA  
GTCCTCTTCATCCTCGTCCAAAGAACTCATCTGTTCTCGTGTGCGCCTGTGTGTGTTTACTTTTCCCAGC  
ACTACGCA

TGTAGACTCTTCCAGCAGCATTCTTTCTTCAAACGATAAAGGGACGCCGTCCTCCGTAGCTGCGAGCTTGC  
TAATGGATAATCAGCGTGCTAACGCTGGGTCTACATCCGTTCCACAAACATTCTCCCCCTAGGGGTAGG  
TCGAAGTC

TATCGATGATTCCATCTCTTTTCCAAGGTAGCTCTAATTTGTTCTGAACCAGGGGTGACAAAGAAGGGGATA  
CGTGGTTTTCAAGCCGGCTTTGGAAGCTTGCTTGACCAAGTCGACAACACGACTCATGTCTTGATAAGATGA  
ATTGGTAC

CCAGCCGTAAGTAAGTATAGTTATGACTTTCATCTCTAGATGATATAGAACCAACAGCATATAATAATATGG  
AAGCGACGAGGAATATTGCAGACGCAACGATATACATGACCTTTCAGCGTGGTCGGTGATGCTGTCTCA  
CAAGGTGT

CGGTAAGTATGTCACTCCAGGTCTGATCGACAGTCATGTCCACATTGCGTCGGTTGCAGGAGAGGCTGATC  
TGACCAAGTTAATGCTGATGCCAAAGTCAGTTGCATTACTCAGAATAAGATACACTTTGGAAGCCGCTCTG  
GCAAGAGG

ATACCCCTAAAGACAGGTAATTTAGCAGCTTTAGAGATGGAGAGATCGCTTCTGTAGTGTTTATCACCGTG  
GTCAGTTACCAATTCTATATTTGCTAACATCTGCCAATGAATTAAGTTGAGTGTTAATTTTCAGTCTTGTC  
CACACCCT

TCCATCTCTTTTCCAAGGTAGCTCTAATTTGTTCTGAACCAGGGGTGACAAAGAAGGGGATACGTGGTTTTCA  
AGCCGGCTTTGGAAGCTTGCTTGACCAAGTCGACAACACGACTCATGTCTTGATAAGATGAATTTGGTACAT  
GATCCAAT

CATCGAAGATGGAAGAGTTAGAGTCACCCAAGAAGTCAGAGGAGACAACAGCGTCTTCAGTGTAACCCAAG  
ACACCCTTCAACTTACCTTCAGCGGCAGCCTTGACAACCTTCTTGATTTTCATCGTAGGTGGTTTCCTTGTT  
CAACTTGA

ACACCTAGCTTCATTGACTTGCTGCTGAATGTAGCCCAGGACATAGATTCCAACGATCTTTTCGGAGCACGA  
TTCCTGGCTGCAGCAGTTCATCCAACATAATAACACGATTCGTTTTTCATGGGCGATGACACCTGGCTGAAAC  
TGTTCCCA

AGAGGATTGCTCGGATGTAATGGCGTATTTCGGCAGCGTATGTTACACCGTGTCTGACACAGAAGCACTGT  
TGGAGTAAATGCTACTCGATGTGGCGGCAGTGTACTAATATTCTTCTCTGTTGAACCTGAAGCCTGAGCA  
GTTTCCGA

ACTTTGGAGACAATTGGATAACCAGCGGCAGCATCGAAGATGGAAGAGTTAGAGTCACCCAAGAAGTCAGAG  
GAGACAACAGCGTCTTCAGTGTAACCCAAGACACCCTTCAACTTACCTTCAGCGGCAGCCTTGACAACCTT  
CTTGATTT

TCAATTCATCGATTTGGATCTTACCGAATTCACCAACGTAACCGATCTTCTTACCCTTTAGGGACTGGAAG  
TCTTCAGTGATAACCACTGCCCTTTAAGTACAAGACACCGGTGAATGGTTCGTCCAACAAAGAGGCAACAGA  
GGTCACTG



CCGTTAGTGGTAAACGTCAATAACACGAGATGCTGACGATGTGACAGAAGTAGCTGTAGATTGAGCTTTGGA  
GGAGACTGGCTTAGTACAGTTGAACAGACGTTATTTGAACAAGTAGTTATGGTAGTTTCAACAGTGGAAG  
CTTGAGTC

CACCAACTGGTCCAAGAGAAGACACCACCAGAGTCGGTGGTGGTGGTGTGCTAGACGTCAAGCTGTGCG  
ATGTTTCTCCATTGAGAAGAGTTAACCAAGCTATTGCTTTGTTGACCATTGGTGCCAGAGAAGCTGCTTTC  
AGAAACAT

GATTTGAGATTTCTTTGTTGGAATAGTAGTGTTCCTTGAATCAATCTTGTGAAAACACCACCTAAAGTTT  
CGATACCTAGAGACAATGGGGTAACATCTAATAATAAGACGTCAGTAACCTCACCGGACAAGACAGCACCT  
TGCACAGC

TGTCTCTAGTTTGGGATAGTGTAGATACCGTCCTTGGATAGAGCACTGGAGATGGCTGGCTTTAATCTGCT  
GGAGTACCATGGGACACCGGTGATCATTCTGGTCACTTGGTCTGGAGAAATACCAGTCAACATGGTGGTGA  
AGTCACCG

TTGGGACTCTGAAAGCCATACCGGTCAACTTACCTTGCAATTCTGGCAAGACCTTACCGACAGCCTTAGCA  
GCACCGGTAGAGGATGGGATGATGTTACCAGGAAAGCGGTTCTACCACCTCTCCAGTCTTGTGGGATGGACC  
GTCAACAG

TCCAAGGTAGCTCTAATTTGTTCTGAACCAGGGGTGACAAAGAAGGGGATACGTGGTTTCAAGCCGGCTTT  
GGAAGCTTGCTTGACCAAGTCGACAACACGACTCATGTCTTGATAAGATGAATTGGTACATGATCCAATCA  
AACCAGCG

GATGAGTCATGACTCAATAATCAAACCATGTTGAAAAGGCTGAAATTTCTAACAATTTCCGGACCATATTC  
CTCATAATCTTTCTTAGTGTGACAGTAGCCTTTGAATTCGGCTGTTTGTGCCAGCAGCGAGCCACCAACC  
AGACAGCG

CTATAGAAATCTAAAATATCTAATCAGATCTTGGAGCTTCCCTTGAAGGAGATGGCAGCTTCTTACCCTATG  
GCAGAAATGATAGTGACCATCAAATCCTTACCTTCATCGAAAGCAGCTTGCATGCTGTCACCCAATTCACC  
TTCTGGTG

ACAACCTCAATCCAGCCGTAAGTAAGTATAGTTATGACTTCATCTCTAGATGATATAGAACCAACAGCATAT  
AATAATATGGAAGCGGACGAGGAATATTGCAGACGCAACGATATACATGACCTTTCAGCGTGGTCGGTGA  
TGCTGTCT

GGGGTTGTTGGAAACGTTGAAGGGGAAGCCGGTACTCTCTCATCCATCAGGATGCCGAAATAGTCACCCA  
AGTACGTCCTGTGATACCCAGCTTGTACATGGAACTCAAAACAAGCACTTGCCCCAAACCAAGAGAGCC  
ACACCCAG

CCGCTGCTGCTGTCTCTCAAATTGGTGATGGTCAAGTTCAAGCTACCACCAAGACTACTGCTGCCGCCGTT  
TCTCAAATCGGTGATGGTCAAGTTCAAGCTACTACCAAGACTACCGCTGCTGCTGTCTCTCAAATCGGTGA  
TGGTCAAG

TAATGCTGATGCCAAAGTCAGTTGCATTACTCAGAATAAGATACACTTTGGAAGCCGCTCTGGCAAGAGGT  
TTCACAACAGTGAGAGACTGTGGGGGTGCAGAAGGCTTTCTGAAAGCAGAGATTGCTCAGGGATCCTTGAA  
TGGTCCCA

GTAAGTATAGTTATGACTTCATCTCTAGATGATATAGAACCAACAGCATATAATAATATGGAAGCGGACGA  
GGAATATTGCAGACGCAACGATATACATGACCTTTCAGCGTGGTGGTGGTGGTGTGCTGTCTCACAAGGTGTGC  
CAGACATG

TTAGTTCACTGGAAATGGTGAATTTGATTAGAGGAGATAGATTCTGCGGAAGTGGTTGCTTTACTGAAAGAG  
AGAGGTTTCAGCAGAAGAGGTGATTTCACTGAAAGTAGACCCGAAGGAAGAAACAGGTTCTGTGCTGGTCC  
TTGACTAG





TTGGGCTTGAGCTTGAGCTTGTACTGGTTGTTGTTGCTGTTGCTGTTGCTGTTGTAGTTGTTGTTGTGGTT  
GTTGTGGTTGCTGTGGTTGTTGTTGTTGCTGTGGTTGCTGTGGTTGCTGTGGTTGCTGTGGTTGCTGTGGT  
TGCTGTGG

GGAACCTTGAGCTTGAGCTAGAAGAAGAAGATGATGATGAGCTAGATTCAGAGTCACTGCTGTCACTGCTGT  
CACTGCTGCTGCTGCTGCTGCTGCTGCTGCTGCTGCTGCTGCTGCTGCTGCTGCTGCTGCTGCTGCTGCTGCT  
GAAGAAGA

TTGGGTAATGGAGGTGTAAGTTGTGAGACAGGTTTCATCAGGGTTGGAGTAGGGTAGTGTAGGGTTGTGGG  
TGTGTGGGTGTGGTGTGGGTGTGGTGTGGGTGTGGTGTGGGTGTGGTGTGGGTGTGGTGTGGGTGTGGGTG  
TGTGGGTG

GCTTGAGCTTGTACTGGTTGTTGTTGCTGTTGCTGTTGCTGTTGTAGTTGTTGTTGTGGTTGTTGTGGTTG  
CTGTGGTTGTTGTTGTTGCTGTGGTTGCTGTGGTTGCTGTGGTTGCTGTGGTTGCTGTGGTTGCTGTGGTT  
GTTGGGAT

CTTGAGCTAGAAGAAGAAGATGATGATGAGCTAGATTCAGAGTCACTGCTGTCACTGCTGTCACTGCTGCT  
GCTGCTGCTGCTGCTGCTGCTGCTGCTGCTGCTGCTGCTGCTGCTGCTGCTGCTGCTGCTGCTGCTGCTGCT  
AGGAGGAG

ATGCTGTTGTTGCTGCTGTTGCTGTTGTAGATGATGATGTTGTTGTTGAAGTTGTTGTTGTTGTTGCAACT  
GGTGTGCTGTTGTAGCTGCTGCTGTTGCTGCAACTGCTGTTGTTGTTGTAATTGCAGCTGTTGCTGCATC  
TGCTGCTG

GTTGTTGTTGTTGTTGTTGCAACTGGTGTGCTGTTGTAGCTGCTGCTGTTGCTGCAACTGCTGTTGTTGTTG  
AATTGCAGCTGTTGCTGCATCTGCTGCTGGTGGTGAGTCAATTGAGGTTGCAGATTGGGTGGTAACAAACC  
AGGATGAG

GAATGATGAGTTGGGTAATGGAGGTGTAAGTTGTGAGACAGGTTTCATCAGGGTTGGAGTAGGGTAGTGTTA  
GGGTTGTGGGTGTGTGGGTGTGGTGTGGGTGTGGTGTGGGTGTGGTGTGGGTGTGGTGTGGGTGTGGTGT  
GGTGTGGG

TGTTGTGGTTGCTGTGGTTGTTGTTGTTGCTGTGGTTGCTGTGGTTGCTGTGGTTGCTGTGGTTGCTGTGG  
TTGCTGTGGTTGTTGGGATTGTTGTTGTGGTTGAGGTACAGTATTAGCTTGATCTTCTGGAGGCTCTGAAA  
TAACAGCA

AAGAAGAAGATGATGATGAGCTAGATTCAGAGTCACTGCTGTCACTGCTGTCACTGCTGCTGCTGCTGCTG  
CTGCTGCTGCTGCTGCTGCTGCTGCTGCTGCTGCTGCTGCTGCTGCTGCTGCTGCTGCTGCTGCTGCTGCT  
GGAGGAGG

CTAGAAGATTCAGAGTCACTGGAACCTTGAGCTTGAGCTAGAAGAAGAAGATGATGATGAGCTAGATTCAGA  
GTCACTGCTGTCACTGCTGTCACTGCTGCTGCTGCTGCTGCTGCTGCTGCTGCTGCTGCTGCTGCTGCTGCT  
TAGAACTG

ACAGGGTAACGAATGATGAGTTGGGTAATGGAGGTGTAAGTTGTGAGACAGGTTTCATCAGGGTTGGAGTAG  
GGTAGTGTAGGGTTGTGGGTGTGTGGGTGTGGTGTGGGTGTGGTGTGGGTGTGGGTGTGGGTGTGGGTGTG  
GTGTGGGT

TTGTTGCAACTGGTGTGCTGTTGTAGCTGCTGCTGTTGCTGCAACTGCTGTTGTTGTTGTAATTGCAGCT  
GTTGCTGCATCTGCTGCTGGTGGTGAGTCAATTGAGGTTGCAGATTGGGTGGTAACAAACCAGGATGAGTA  
GCGGTGTT

TGTTGTTGAAGTTGTTGTTGTTGTTGTTGCAACTGGTGTGCTGTTGTAGCTGCTGCTGTTGCTGCAACTGCTG  
TTGTTGTTGTAATTGCAGCTGTTGCTGCATCTGCTGCTGGTGGTGAGTCAATTGAGGTTGCAGATTGGGTG  
GTAACAAA

GAGTCTGAGTCCGAGCTTGAGTCGGAATCCGAATCTGAATCCGAGGAAGAGCTGCTAGAGCTGGAGCTAGA  
GTCGGAGTCAGATGAAGAGTCGCTGGAGCTGGAGTCGGAGTCAGACGAAGAGTCGCTAGAGCTGGAGCTAG  
AACTTGAT

GTCGGATTCACTAGAAGATTCAAGAGTCACTGGAACCTTGAGCTTGAGCTAGAAGAAGAAGATGATGATGAGC  
TAGATTCAAGAGTCAGTGTCTACTGCTGTCTACTGCTGTCTGTCTGTCTGTCTGTCTGTCTGTCTGTCTGT  
GATTTCGCC

TTCGACTTGACCTTGACTGGATCTCCTGCGACATACCTCTGGTCTGTTGAAGACAACCTCTGCCACGTGGGG  
CAAAGAAGAAGCATCAGTGACCTTGTTCTCTCACCAGGAAGAGCCGATCTCCTTCGATGCGGTAGAACCTT  
GCAAGTGC

GCTGTTGTAGATGATGATGTTGTTGTTGAAGTTGTTGTTGTTGTTGTTGTTGCAACTGGTGTCTGTTGTAGCTGC  
TGCTGTTGCTGCAACTGCTGTTGTTGTTGTAATTGCAGCTGTTGCTGCATCTGCTGCTGGTGGTGAGTCAA  
TTGAGGTT

TTGAGTGGAAGATAATTTCTTCACCACTGGATGCTGTTGTTGCTGCTGTTGCTGTTGTAGATGATGATGTT  
GTTGTTGAAGTTGTTGTTGTTGTTGCAACTGGTGTCTGTTGTAGCTGCTGCTGTTGCTGCAACTGCTGT  
TGTGTTGTTG

ATGATGATGTTGTTGTTGAAGTTGTTGTTGTTGTTGTTGCAACTGGTGTCTGTTGTAGCTGCTGCTGTTGCT  
GCAACTGCTGTTGTTGTTGTAATTGCAGCTGTTGCTGCATCTGCTGCTGGTGGTGAGTCAATTGAGGTTGC  
AGATTGGG

TGGTGCTTAGTGATTGTTGTTGAAGCTGCCCTCGCCTACACTTTCAGCTGCTGCTGGAGTGGATGATTGTGAC  
GGAGAGGACCCACCGTCCAGAATTGTTTCACTGTCAAAACGCCCTATGGAGAAGAGATGAACACGG  
TACTGTTC

CACAATACCGTGTCTCCAGATGGCAACAAATGGAGTGGTACCATCTTCACGGTAGTTCAACATGACAACCA  
TGGCATCTGGGTCCATGGATTCAACAGTGAAGAACTCCCAGTCCTTGAAAGAACCAATAACCTTCTTGACG  
TAAGTTTG

CCTTGACTGGATCTCCTGCGACATACCTCTGGTCTGTTGAAGACAACCTCTGCCACGTGGGGCAAAGAAGAA  
GCATCAGTGACCTTGTTCTCTCACCAGGAAGAGCCGATCTCCTTCGATGCGGTAGAACCTTGCAAGTGCAA  
TGGCTTGA

GTCGGAATCCGAATCTGAATCCGAGGAAGAGCTGCTAGAGCTGGAGCTAGAGTCGGAGTCAGATGAAGAGT  
CGCTGGAGCTGGAGTCGGAGTCAGACGAAGAGTCGCTAGAGCTGGAGCTAGAACTTGATTGAGAATCTGAT  
TCAGAATC

TCACCACTGGATGCTGTTGTTGCTGCTGTTGCTGTTGTAGATGATGATGTTGTTGTTGAAGTTGTTGTTGT  
TGTTGCAACTGGTGTCTGTTGTAGCTGCTGCTGTTGCTGCAACTGCTGTTGTTGTTGTAATTGCAGCTG  
TTGCTGCA

AGCTAGGGACGAGGAAACTGGTGATAAAGAGCAAGAACAAGAAGAACAAGAGGGTGCTGACAATGAGGACG  
ACGATGATGAGGATGACGAAGAGGATGAGGAGGACGAGGAGGAGGAAGAAGCTCTAAATGAAACAGCATCC  
GATGAGAG

GAGGAAACTGGTGATAAAGAGCAAGAACAAGAAGAACAAGAGGGTGCTGACAATGAGGACGACGATGATGA  
GGATGACGAAGAGGATGAGGAGGACGAGGAGGAGGAAGAAGCTCTAAATGAAACAGCATCCGATGAGAGCA  
ATGACGAG

CAATTCTGCTTTGAGTGAAGATAATTTCTTCACCACTGGATGCTGTTGTTGCTGCTGTTGCTGTTGTAGA  
TGATGATGTTGTTGTTGAAGTTGTTGTTGTTGTTGTTGCAACTGGTGTCTGTTGTAGCTGCTGCTGTTGCTG  
CAACTGCT

TTTCTTCTCTCAATTCTGCTTTGAGTGGAAGATAATTTCTTCACCACTGGATGCTGTTGTTGCTGCTGTTG  
CTGTTGTAGATGATGATGTTGTTGTTGAAGTTGTTGTTGTTGTTGTTGCAACTGGTGTGCTGTTGTAGCTGCT  
GCTGTTGC

AAAGGAGCAATAAACGACAAACTACCGACAGTCTTTATGAAGAGGAAGTTGACAAACTCAGCGTTGGGTCA  
CTGTTTGGGACTTGATTTCTGACTGATCCGAGCGAGTCAGAACATGAATACAGGTGCATGTTTCAGACAG  
TTCAGGAC

CCGAGCTTGAGTCGGAATCCGAATCTGAATCCGAGGAAGAGCTGCTAGAGCTGGAGCTAGAGTCGGAGTCA  
GATGAAGAGTCGCTGGAGCTGGAGTCGGAGTCAGACGAAGAGTCGCTAGAGCTGGAGCTAGAACTTGATTG  
AGAATCTG

ATTGTTCTTCTTGGGCTTGAGCTTGAGCTTGACTGGTTGTTGTTGCTGTTGCTGTTGCTGTTGTAGTTGT  
TGTTGTGTTGTTGTGGTTGCTGTGGTTGTTGTTGTTGCTGTGGTTGCTGTGGTTGCTGTGGTTGCTGTGG  
TTGCTGTG

TGCTTCCAGATGGCAACAAATGGAGTGGTACCATCTTCACGGTAGTTCAACATGACAACCATGGCATCTGG  
GTCCATGGATTACCAGTGAAGAACTCCCAGTCCTTGAAAGAACCAATAACCTTCTTGACGTAAGTTTGAG  
CACCTTTT

TGATGATGAGCTAGATTAGAGTCACTGCTGTCCTGCTGTCCTGCTGCTGCTGCTGCTGCTGCTGCTGCTG  
TGCTGCTTGAAGATTGCGCCGCTAGAAGTGGACGAGGAAGATGAAGAAGAAGAGGAGGAGGAGGAGGAG  
GAGGAGGA

TGCTGCTGTTGCTGTTGTAGATGATGATGTTGTTGTTGAAGTTGTTGTTGTTGTTGTTGCAACTGGTGTGCTG  
TTGTAGCTGCTGCTGTTGCTGCAACTGCTGTTGTTGTTGTAATTGCAGCTGTTGCTGCATCTGCTGCTGTT  
GGTGAGTC

GTCTAGATTAATTGGTCTACATAGCGGCAAGATGTTTGTGTACCTTCACATGTCAAAGAGGGCTCCAGGT  
GGTACTTCCCCATGCACTTGGAAATTGGTTTCAGCGTTCCCTCCATGGATAGTTCCCTTATTGTACGGTAGCGAC  
CCCAACTT

GTCGATATAGTTTCGACTTGACCTTGGACTGGATCTCCTGCGACATACCTCTGGTCTGTTGAAGACAACCTCTG  
CCACGTGGGGCAAAGAAGAAGCATCAGTGACCTTGTCTCCTCACCAGGAGCCGATCTCCTTCGATGCG  
GTAGAACC

TTAACTAACTCGTCCAACCTTGAAGGCCCTTCCCTTCCAGCAGCAACAACCTTGCTTACCAGACGAGGAGA  
GCTGGACGATTTCGAAACCCACTGGTTTACAGATCCCAAAACAACGAGGTTGAAGGAAATCAATCTCTCCA  
CAGGTGGC

TTAGCCAGGTCTTGGTTGGGTCGATATAGTTTCGACTTGACCTTGGACTGGATCTCCTGCGACATACCTCT  
GGTCGTTGAAGACAACCTCTGCCACGTGGGGCAAAGAAGAAGCATCAGTGACCTTGTCTCCTCACCAGGAG  
AGCCGATC

TATAAGAGAATGGTGCTTAGTGATTGTTGAAGCTGCCCTCGCCTACACTTTCAGCTGCTGCTGGAGTGGA  
TGATTGTGACGGAGAGACCACCCACGTGCCAGAATTGTTTCACTGTCAAACGCCCTATGGAGAAGAG  
ATGAACAC

GAAGATCCACTGGAGCTAGAGTCGGATTCACTAGAAGATTAGAGTCACTGGAACCTTGAGCTTGAGCTAGA  
AGAAGAAGATGATGATGAGCTAGATTAGAGTCACTGCTGTCCTGCTGCTGCTGCTGCTGCTGCTGCTG  
TGCTGCTG

GAATCTGAATCCGAGGAAGAGCTGCTAGAGCTGGAGCTAGAGTCGGAGTCAGATGAAGAGTCGCTGGAGCT  
GGAGTCGGAGTCAGACGAAGAGTCGCTAGAGCTGGAGCTAGAACTTGATTGAGAATCTGATTGAGAATCTG  
ATTCGGAA

TGGTGTATTATTGTCTAGATTAATTGGTCTACATAGCGGCAAGATGTTTGTGTACCTTCACATGTCAAAGAG  
GCGTCCAGGTGGTACTTCCCCATGCACTTGGAAATGGTTTCAGCGTTCCCTCCATGGATAGTTCCCTTATTGTA  
CGGTAGCG

TGGAGCTAGAGTCGGATTCACTAGAAAGATTGAGAGTCACTGGAACTTGAGCTTGAGCTAGAAGAAGAAGAT  
GATGATGAGCTAGATTGAGAGTCACTGCTGTCACTGCTGTCACTGCTGTCTGCTGTCTGCTGTCTGCTGTCTGCT  
GCTGCTTG

TGGGTTAACAGGTTGGCCATTTTGCATTTGAACTTCAGGTTGGGGTTGACCTTGAGGTTGCTGTTGCTGTT  
GCTGTTGTGATTGCTTCTGTTGAGAGTCTTCAGAATGCTGGGCAACACCTTGATTTGGACTTTGCTGTTCC  
TGACCGTT

AAATACGGAAAGCTAGGGACGAGGAAACTGGTGATAAAGAGCAAGAACAAGAAGAACAAGAGGGTGTGAC  
AATGAGGACGACGATGATGAGGATGACGAAGAGGATGAGGAGGACGAGGAGGAGGAAGAAGCTCTAAATGA  
AACAGCAT

GAGTTTCAAGGACAACCTGTTCCGTGGGAAGTTTGTTCAGAGAAGACCCACGACAATCCGCTTCAGATG  
TGCCGATGGACTCTCCTGACACGTCCGCATTGCTCTCAATCTCACCGTTGAATGTTTCTCCTCTAAGGAG  
GAATCCAG

GATAATTTCTTACCACCTGGATGCTGTTGTTGCTGCTGTTGCTGTTGTAGATGATGATGTTGTTGTTGAA  
TTGTTGTTGTTGTTGCAACTGGTGGTGGTGGTGGTGGTGGTGGTGGTGGTGGTGGTGGTGGTGGTGGTGGT  
ATTGCAGC

TTGTTGTTGAGGCGACTGCTGGAAGTGACCTTGATAAGGCGCTTGTGTTGTTGCTGTTGTTGCTGCTGCT  
GCTGCTGTTGTTGTTGTTGAGGCTGGGCTTGAAGTGGTTCAGTATTGGTGGGTTGCTGTTGTTGTTGTTGTTGTT  
TCTCTGTA

CCTTGGTTGGGTCGATATAGTTGACTTGACCTTGGACTGGATCTCCTGCGACATACCTCTGGTCGTTGAA  
GACAACCTCTGCCACGTGGGGCAAAGAAGAAGCATCAGTGACCTTGTCTCCTCACCGGAAGAGCCGATCTC  
CTTCGATG

AGGAGAATAATGGTTACCAGTCTTCTTGAAGTAAGCTTCATCAGCTTCCAACATACCATCGAACCATGGC  
AACAACTTCTTGGCACAGTGGTCAGAGTGAAGACAACCTGGGATACCGTAAGCTGGAGCAATGGATCTGAT  
GTAGTGGG

TTTGTGTTGTGGGTTAACAGGTTGGCCATTTTGCATTTGAACTTCAGGTTGGGGTTGACCTTGAGGTTGC  
TGTTGCTGTTGCTGTTGTTGATTGCTTCTGTTGAGAGTCTTCAGAATGCTGGGCAACACCTTGATTTGGACT  
TTGCTGTT

TGATTCGTTGAAGCTGCCCTCGCCTACACTTTTCACTGCTGCTGGAGTGGATGATTGTGACGGAGAGGACC  
ACCCACGTGCCAGAATTGTTTCACTGTCAAACGCCCCTATGGAGAAGAGATGAACACGGTACTGTTCTC  
TGTAATGC

AGACCCAGGCTGTAACGCTGAAGGATTGATGTTAGCGACGACGTCGCCAATCCACGGAACGCTACAAC  
TTGTCCCCTTCTCCGGAGGACGAAGACTTCGAAGGCCCCACTGAAGAAGAAATGCAGACTTTAAGGCACGT  
TGGTGGTA

CTAGATTCAGAGTCACTGCTGTCACTGCTGTCACTGCTGCTGCTGCTGCTGCTGCTGCTGCTGCTGCTGCTGTTGA  
AGATTCGCCGCTAGAAGTGGACGAGGAAGATGAAGAAGAAGAGGAGGAGGAGGAGGAGGAGGAGGAGGAAG  
AAGAAGAA

GTACTTTTCTTTAGCCAGGTCTTGGTTGGGTCGATATAGTTGACTTGACCTTGGACTGGATCTCCTGCG  
ACATACTCTGGTCGTTGAAGACAACCTCTGCCACGTGGGGCAAAGAAGAAGCATCAGTGACCTTGTCTCC  
TCACCGGA

ACGTAGTCTCTGATACCAGTCAAGTAAGCGTATTGACAGTCAGTGTCCAAGTTGACCTTGACAACACCGTT  
GTCAATACCAGTGTGGAATTCTTGGACAGTAGAACC/GGAACCACCGTGGAAGACCAAGAACAATGGCTTTT  
CTTCCTTG

CGAGCCTGAAGAGTCTGAGTCCGAGCTTGAGTCGGAATCCGAATCTGAATCCGAGGAAGAGCTGCTAGAGC  
TGGAGCTAGAGTCCGAGTCAGATGAAGAGTCGCTGGAGCTGGAGTCCGAGTCAGACGAAGAGTCGCTAGAG  
CTGGAGCT

CGTCCAACCTGAAGGCCCTTCCTTCCAGCAGCAACAACCTTGCTTACCAGACGAGGAGAGCTGGACGAT  
TCGGAAACCCTGGTTACAGATCCCAAACAACGAGGTTGAAGGAAATCAATCTCTCCACAGGTGGCAG  
AGATTCCG

GACAACCTGTTCCGTGGGAAGTTTGTTCAGAGAAGACCCACGACAATCCGCTTCAGATGTGCCGATGGA  
CTCTCCTGACACGTCCGCATTGTCTCAATCTCACCGTTGAATGTTTCCTCCTCTAAGGAGGAATCCAGTG  
ACACGCAA

GTCACTGCTGTCACTGCTGCTGCTGCTGCTGCTGCTGCTGCTGCTGCTTGAAGATTCCGCCGCTAGA  
ACTGGACGAGGAAGATGAAGAAGAAGAGGAGGAGGAGGAGGAGGAGGAGGAAGAAGAAGAAGATTTCTCT  
TCAATCTC

GGCAATGCCGCTCGAAGTAGGAGTTTCAAGGACAACCTGTTCCGTGGGAAGTTTGTTCAGAGAAGACCC  
ACGACAATCCGCTTCAGATGTGCCGATGGACTCTCCTGACACGTCCGCATTGTCTCAATCTCACCGTTGA  
ATGTTTCC

CCGAGGAAGAGCTGCTAGAGCTGGAGCTAGAGTCCGAGTCAGATGAAGAGTCGCTGGAGCTGGAGTCCGAG  
TCAGACGAAGAGTCGCTAGAGCTGGAGCTAGA  
ACTTGATTGAGAATCTGATT  
CAGAATCTGATT  
CCGAATC  
AGAAGAAC

GCATTATGATGACGGCAACTACAACGCAGAATACTCAGGACACCAAGAAGTCGCAGGACCTGGTCATGAAG  
CTGTCAA  
ACTCGATGAATGAAGTAGTTCAAATCACCGCGTGCTGACAATGATCAAGCCATTCAAGATCTT  
CGAGCACG

CTGCAAGACAATTGGTGATGAAACTCGACAACGCTAGTTACAGTTCTGTCTCTGCATCTTCATCTCCATCT  
CCCTCCACACCGACGAAAAGTGGCAAGATGAGATCAAGATCATCCTCACCTGTGCGTCCCAAGGCATA  
CAC  
TCCAAGCC

GCTGTGGTTGTTGTTGTTGCTGTGGTTGCTGTGGTTGCTGTGGTTGCTGTGGTTGCTGTGGTTGCTGTGGT  
TGTTGGGATTGTTGTTGTTGTTGAGGTACAGTATTAGCTTGATCTTCTGGAGGCTCTGAAATAACAGCACT  
AATTTCAA

TCCGTGGGAAGTTTGTTCAGAGAAGACCCACGACAATCCGCTTCAGATGTGCCGATGGACTCTCCTGAC  
ACGTCCGCATTGTCTCAATCTCACCGTTGAATGTTTCCTCCTCTAAGGAGGAATCCAGTGACACGCAAAG  
CTCGCCTC

TGCTGCTGCTGCTGCTGCTGCTGCTGCTTGAAGATTCCGCCGCTAGA  
ACTGGACGAGGAAGATGAAGAAGAA  
GAGGAGGAGGAGGAGGAGGAGGAGGAAGAAGAAGAAGATTTCTCTTCAATCTCCTTCTCCTTAAC  
ACTTAATT

CTGATTCCGATTCCGAAGAAGATTCGTCAGA  
ACTAGAGCTAGAGGAAGAAGAAGATCCACTGGAGCTAGAG  
TCGGATTACTAGAAGATTCAGAGTCACTGGA  
ACTTGAGCTTGAGCTAGAAGAAGAAGATGATGATGAGCT  
AGATTCAG

CATCAAATTC  
AAGCATAACGAAAAGGGAAGTAGAAGGTCCAGTGGCTCATCACCCACTCGTCACACCACA  
AGAGTGTGCGTGTGCGTGCATTTCGAGTGATTCGCCCTGTTGGAGGCCATCGTGGTCGCCAAGAAAGCAAGA  
TCAGCTAT



TGCATTTGCTGCGAAGAAGGAATTTCTAGTTAAGGATCTCACTGAGGAAAGGCACCTAGCCAAGGCCAAGC  
AGCAGGATGGTTGCGAAGCTGGAGAGGTTCCATAATCCCTTCAACGATCCAAGTATGTCTAATGCTATGATG  
AACATGGC

TCTTTTCTTCCACAATACCGTGCTTCCAGATGGCAACAAATGGAGTGGTACCATCTTCACGGTAGTTCAAC  
ATGACAACCATGGCATCTGGGTCCATGGATTACACAGTGAAGAACTCCCAGTCCTTGAAAGAACCAATAAC  
CTTCTTGA

CTCGAAGTAGGAGTTTCAAGGACAACCTGTTCCGTGGGAAGTTTGTTCAGAGAAGACCCACGACAATCC  
GCTTCAGATGTGCCGATGGACTCTCCTGACACGTCCGCATTGTCTCAATCTCACCGTTGAATGTTTCCTC  
CTCTAAGG

CTTGTTCAAGACGTAGTCTCTGATAACCAGTCAAGTAAGCGTATTGACAGTCAGTGTCCAAGTTGACCTTGA  
CAACACCGTTGTCAATACCAGTGTGGAATTCCTGGACAGTAGAACCGGAACCACCGTGAAGACCAAGAAC  
AATGGCTT

GAATTAGCCCAAACCGTATGCAAATCGACCGGTTTTCTTAGTGAATGCAGAAGAACTGCGTTCCACCACTGA  
CTCCAACAAGCCACCTTTTGGCCTTGTCTTGTCAACGATCCGATTTCTTATTATCATACAAAGTGACAG  
TAGAGAAT

GGGCGCAGTGGCAATGCCGCTCGAAGTAGGAGTTTCAAGGACAACCTGTTCCGTGGGAAGTTTGTTCCTCA  
GAGAAGACCCACGACAATCCGCTTCAGATGTGCCGATGGACTCTCCTGACACGTCCGCATTGTCTCAATC  
TCACCGTT

TGGTCGTTGAAGACAACCTCTGCCACGTGGGGCAAAGAAGAAGCATCAGTGACCTTGTTCCTCACCGGAA  
GAGCCGATCTCCTTCGATGCGGTAGAACCCTTGCAAGTGAATGGCTTGATCAGGAACTCCCTCAACAGAGT  
ATTAGAAA

AGTCACTGCTGCTCACTGCTGCTCACTGCTGCTGCTGCTGCTGCTGCTGCTGCTGCTGCTGCTGCTTGAAGATTGCGCG  
CTAGAAGTGGACGAGGAAGATGAAGAAGAAGAGGAGGAGGAGGAGGAGGAGGAAGAAGAAGAAGA  
AGATTTCT

AGACAAATCCAACATGTGGGAGGAGAATAATGGTTACCGTGTTCTTGAAGTAAGCTTCATCAGCTTCCA  
ACATACCATCGAACCATGGCAACAACCTTCTTGGCAGTGGTCAGAGTGAAGACAACCTGGGATACCGTAA  
GCTGGAGC

AAGCTGCCCTCGCCTACACTTTTCAGCTGCTGCTGGAGTGGATGATTGTGACGGAGAGGACCACCCACGTG  
CCAGAATTGTTTCACTGTCAAAACGCCCTATGGAGAAGAGATGAACACGGTACTGTTCTCTGTAATGCAT  
GTGGCCTC

AGGAAGCCTCGTTAGTGCCCTTCTTCAATATCCTTTATCAACTGTTTGGTGTCTTGACAGGCTCTTGGTG  
CTTCTTGGCTTCTTCTCTTGAACCATGACATAAAGTCCCCGTTTGCAGCGGAAGTGTGAATACATCTGG  
TTTCTGCT

CACCAAGAGGTTAACTAACTCGTCCAACCTGAAGGCCCTTCCTTCCCAGCAGCAACAACCTGCTTACCA  
GACGAGGAGAGCTGGACGATTGCGAAACCCACTGGTTACAGATCCAAAACAACGAGGTTGAAGGAAATC  
AATCTCTC

TTTGCAATTTGAACCTCAGGTTGGGGTTGACCTTGGAGTGGTGTGTTGCTGTTGCTGTTGTTGATTGCTTCTGT  
TGAGAGTCTTCAGAATGCTGGGCAACACCTTGATTTGGACTTTGCTGTTCCTGACCGTTTTGAGTTTGGTA  
ATAGTTGT

TCACTGCTGCTGCTGCTGCTGCTGCTGCTGCTGCTGCTGCTGCTTGAAGATTGCGCGCTAGAAGTGGACGAGGAAGA  
TGAAGAAGAAGAGGAGGAGGAGGAGGAGGAGGAGGAAGAAGAAGAAGAAGATTTCTCTTCAATCTCCT  
TCTCCTTA

ACAGCAATCTCAAAACACCAATAATGCGTTTTGGTAATCAAAATCAGCTGGGGGGCAGTTCCTTCGGATCAA  
AACCAGTTGGTTCAGGGTCGCTGTTTGGCCAGAGCAACAACACTTTAGGTAATACAACCAATAATAGAAAT  
GGATTGTT

GTCAAATCCAAGCTACTACCACTGCTACCACCGAAGCTACCACCACTGCTGCCCATCTTCCACCGTTGAA  
ACTGTTTCTCCATCCAGCACCGAAACTATCTCTCAACAACTGAAAATGGTGCTGCTAAGGCCGCTGTCCG  
TATGGGTG

CCGTCGACACCCTCCTTGAACACCAAGAGGTTAACTAACTCGTCCAACCTGAAGGCCCTTCTTCCAGC  
AGCAACAACCTTGCTTACCAGACGAGGAGAGCTGGACGATTTCGAAACCCACTGGTTCACAGATCCAAAA  
CAACGAGG

AGAGAAGACCCACGACAATCCGCTTCAGATGTGCCGATGGACTCTCCTGACACGTCCGCATTGTCCTCAAT  
CTCACCGTTGAATGTTTCTCCTCTAAGGAGGAATCCAGTGACACGCAAAGCTCGCCTCCAACTTCTCAA  
GTAAGCGC

TGTAGTCCTTCTTGTTCAGACGTAGTCTCTGATACCAGTCAAGTAAGCGTATTGACAGTCAGTGTCCAAG  
TTGACCTTGACAACACCGTTGTCAATACCAGTGTGGAATTCTTGGACAGTAGAACCAGGAAACCAGTGGAA  
GACCAAGA

CCTCCTTGAACACCAAGAGGTTAACTAACTCGTCCAACCTGAAGGCCCTTCTTCCAGCAGCAACAAC  
TGCTTACCAGACGAGGAGAGCTGGACGATTTCGAAACCCACTGGTTCACAGATCCAAAAACAACGAGGTT  
GAAGGAAA

TTCAAGCTGCTAAGTCTACTGCCGCTGCCGTTTTCTCAAATAACTGATGGTCAAGTTCAAGCTGCCAAGTCT  
ACTGCTGCCGCTGCCTCTCAGATTTCTGACGGCCAAGTTCAGGCCACTACCTCTACTAAGGCTGCTGCATC  
CCAAATTA

GCCACGTGGGGCAAAGAAGAAGCATCAGTGACCTTGTTCCTCACCGGAAGAGCCGATCTCCTTCGATGC  
GGTAGAACCTTGCAAGTGCAATGGCTTGATCAGGAACTCCCTCAACAGAGTATTAGAAATGTTGGCGACGT  
AGTCGACG

TGGTCAAGCAGATGCCTACATCACTCATTAGCATTATGATGACGGCAACTACAACGCAGAATACTCAGGAC  
ACCAAGAAGTCGACGACCTGGTCATGAAGCTGTCAAACCTCGATGAATGAAGTAGTTCAAATCACCAGCGT  
GCTGACAA

AGTCAAGGAAACGCAAATGACGAATACGATGCCGAACAAATGCGGTTGAAGGAACACGAACACGAACAGAA  
ACTGCTGGCCAGGGAACAAGAGTTAAGAGACATTGTTGCAAACACCAACGATAAACTAATAGACATATCGA  
TGATAAAC

TTGGACGACGTGGTGTTATTGTCTAGATTAATTGGTCTACATAGCGGCAAGATGTTTGTGTACCTTCACA  
TGTCAAAGAGGCGTCCAGGTGGTACTTCCCCTATGCACTTGGAAATTGGTTCAGCGTTTCTCCATGGATAGTT  
CCTTATTG

CTCATTTCACCAACTTGTTCCTCAGTCGACCCAAAGCGCCTCCTTTGGATTCCAAAGTCCCCTCTGGA  
CACACTTCTGCAGGTCCATCCCGAACGTCGGGTCTGTGTGCTTGTATTTGAGCACTGAATCCAGCTTTGGA  
ATCTGCCT

GCTGCTAGAGCTGGAGCTAGAGTCGGAGTCAGATGAAGAGTCGCTGGAGCTGGAGTCGGAGTCAGACGAAG  
AGTCGCTAGAGCTGGAGCTAGAACTTGATTGAGAATCTGATTGAGAATCTGATTGGAATCAGAAGAACTA  
CTTGAGCT

AGTTTCTACTATGGCATTGGAGAATTGGATTCTCAGATTCTCAAACCTTCAACCTCTTGGTCGTCGTCATT  
TGAAAGAGCAGTTCTCAGGTGTTTCTTGTACTGCCGTCCTTCCAGAAGAAATTCGACGATGACAATAG  
TCGGAGAG

TGGAAGTGCATTTGTTGTTGTGGGTTAACAGGTTGGCCATTTTGCATTTGAACTTCAGGTTGGGGTTGACC  
TTGAGGTTGCTGTTGCTGTTGCTGTTGTGATTGCTTCTGTTGAGAGTCTTCAGAATGCTGGGCAACACCTT  
GATTTGGA

AAGCATAACGAAAAAGGGAAGTAGAAGGTCCAGTGGCTCATCACCCACTCGTCACACCACAAGAGTGTGCG  
TGTCGTGTCATTTCGAGTGATTTCGCCCTGTTGGAGGCCATCGTGGTCGCCAAGAAAGCAAGATCAGCTATGT  
AACTCTTG

GATCTCCTGCGACATACCTCTGGTCGTTGAAGACAACCTCGCCACGTGGGGCAAAGAAGAAGCATCAGTGA  
CCTTGTCTCCTCACCGGAAGAGCCGATCTCCTTCGATGCGGTAGAACCTTGCAAGTGCAATGGCTTGATC  
AGGAACTC

GTTACCGACTGGGGACATTATGTAGTCCTTCTTGTTCAGACGTAGTCTCTGATACCAGTCAAGTAAGCGT  
ATTGACAGTCAGTGTCCAAGTTGACCTTGACAACACCGTTGTCAATACCAGTGTGGAATTCTTGGACAGTA  
GAACCGGA

TGATACCAGTCAAGTAAGCGTATTGACAGTCAGTGTCCAAGTTGACCTTGACAACACCGTTGTCAATACCA  
GTGTGGAATTCTTGGACAGTAGAACCAGGACCGTGGAAAGACCAAGAACAATGGCTTTTCTTCTTGCA  
ACCAACTT

AAACTCGACAACGCTAGTTACAGTTCGTCTCTGCATCTTCATCTCCATCTCCCTCCACACCGACGAAAAG  
TGGCAAGATGAGATCAAGATCATCTCACCTGTGCGTCCAAGGCATACACTCCAAGCCCAAGGTCACCCA  
ATTATCAT

GGGCATATCTAAAGGAGCAATAAACGACAAACTACCGACAGTCTTTATGAAGAGGAAGTTGACAAACTCAG  
CGTTGGGTCAGTGTGGGACTTGATTTCTGACTGATCCGAGCGAGTCAGAACATGAATACAGGTGCATG  
TTTCAGAC

AACTTCAGGTTGGGGTTGACCTTGAGGTTGCTGTTGCTGTTGCTGTTGTGATTGCTTCTGTTGAGAGTCTT  
CAGAATGCTGGGCAACACCTTGATTTGGACTTTGCTGTTCTGACCGTTTTGAGTTTTGGTAATAGTTGTAA  
TTGTTCTT

AACCTGATCAACCTGTCTCCAAACCTACCTCACATTACCCTACCTCTCCACTCGTTACCCTGCCCCACT  
CAACCATAACACTCCCACCCACCATCCATCTCTCTACTGTACCAGCCACCGTCCACCATAACCGTTACC  
CTCCCATT

TCATAACAGAGGGCATATCTAAAGGAGCAATAAACGACAAACTACCGACAGTCTTTATGAAGAGGAAGTTG  
ACAAACTCAGCGTTGGGTCAGTGTGGGACTTGATTTCTGACTGATCCGAGCGAGTCAGAACATGAATA  
CAGGTGCA

CGATGAGTTACCAAATGGAAAATGATCAAAGCTCAACCAAACATCAAGACTGGGTACAGTCAGCTGAAC  
AGAAAACCTTCAAACAATCCTCACTCTCGGTTGTTCAAGGTCGTGCTGACCATATGGCATTATAGCGAGATT  
TTGCTATT

TTAAGTGCAGGCGTTGGTTATGCTTCGTCTACAATTGGTTGGTGTGCACCGATGGGTCATGTTGGACCTTG  
ATCATAGGTCTGTACACAGGCTCCACATTTGGGCTTTGACCCACTGTAAACATTCGTCAAAGTCACGAGG  
AACCTTGA

GGTTGGCCATTTTGCATTTGAACTTCAGGTTGGGGTTGACCTTGAGGTTGCTGTTGCTGTTGCTGTTGTGA  
TTGCTTCTGTTGAGAGTCTTCAGAATGCTGGGCAACACCTTGATTTGGACTTTGCTGTTCTGACCGTTTT  
GAGTTTGG

CTGAAGGTAATGATGCCGCTCAAGGAATGGATTTAGCCAAATGATGGGAGGTGCTGGAGGTGCTGGAGGT  
GCTGGAGGCATGGACTTCAGCCAAATGATGGGAGGTGCTGGTGGCGCTGGTTCTCCAGATATGGCTCAATT  
GCAGCAAT

CTAATTTTCGCTAGACTTAGATCTTTTCTTCCACAATACCGTGCTTCCAGATGGCAACAAATGGAGTGGTAC  
CATCTTCACGGTAGTTCAACATGACAACCATGGCATCTGGGTCCATGGATTACCAGTGAAGAACTCCCAG  
TCCTTGAA

GGGATTTCAATATCAAATTCTTCTTCAATAGCTACGAGCAGCTCGACAGTGTCCAAGGAGTCCAACCCCAA  
ATCCTTGTGAAATTGGGTATCGCTGGAGATTTGCTTGTGGCAATGTTGGGAGAGTTCTTATCAAACGCCT  
TGATAACA

AACATGTGGGAGGAGAATAATGGTTCACCGTGTTCCCTTGAAGTAAGCTTCATCAGCTTCCAACATACCATC  
GAACCATGGCAACAACCTTCTTGGCACAGTGGTCAGAGTGTAAAGACAACCTGGGATACCGTAAGCTGGAGCAA  
TGGATCTG

AGACAACCTTGCCACGTGGGGCAAAGAAGAAGCATCAGTGACCTTGTTCCTCACCGGAAGAGCCGATCT  
CCTTCGATGCGGTAGAACCTTGCAAGTGAATGGCTTGATCAGGAACCTCCCTCAACAGAGTATTAGAAATG  
TTGGCGAC

GGGGACATTATGTAGTCCTTCTTGTTCAGACGTAGTCTCTGATACCAGTCAAGTAAGCGTATTGACAGTC  
AGTGTCCAAGTTGACCTTGACAACACCGTTGTCAATACCAGTGTGGAATTCTTGGACAGTAGAACCGGAAC  
CACCGTGG

GATGCCTACATCACTCATTAGCATTATGATGACGGCAACTACAACGCAGAATACTCAGGACACCAAGAAGT  
CGCAGGACCTGGTCATGAAGCTGTCAAACCTCGATGAATGAAGTAGTTCAAATCACCAGCGTGCTGACAATG  
ATCAAGCC

TGATGCCGCTCAAGGAATGGATTTTCCAGCCAAATGATGGGAGGTGCTGGAGGTGCTGGAGGTGCTGGAGGCA  
TGGACTTCCAGCCAAATGATGGGAGGTGCTGGTGGCGCTGGTTCTCCAGATATGGCTCAATTGCAGCAATTA  
TTGGCTCA

GTCACACCAAAGGGATCCAATGTGGTGAGACCATACTCCTGTGAGTGATCTTTCCAGAAGGGTCACTT  
CCAGCTGGTCGTCAAGCATTATGAAGGTGGTAAAATGACCTCACATTTATTTGGTCTTAAACCAAATGACA  
CCGTTTTCT

TGTCTTCCGATGCATTTGCTGCGAAGAAGGAATTTCTAGTTAAGGATCTCACTGAGGAAAGGCACCTAGCC  
AAGGCCAAGCAGCAGGATGGTTCGCAAGCTGGAGAGGTTCTAATCCCTTCAACGATCCAAGTATGTCTAA  
TGCTATGA

AGAATCAATGAAATACGGAAAGCTAGGGACGAGGAAACTGGTGATAAAGAGCAAGAACAAGAACAAGA  
GGGTGCTGACAATGAGGACGACGATGATGAGGATGACGAAGAGGATGAGGAGGACGAGGAGGAGGAAGAAG  
CTCTAAAT

TCTACAAGTACCTCTTCTTTTCCAGCTTTTCCAGAACTTCTACAGCCTCCACCTCCGTTCAAATATCTTCTCA  
GTTTGTGACTCCATCCTCCCCTATTTCCACAGTTGCCCTCGTTCTACAGGGCTCAATAGTCAAACCTGAAA  
GTACAAAT

GTTTGTTCAGAGAAGACCCACGACAATCCGCTTCAGATGTGCCGATGGACTCTCCTGACACGTCCGCAT  
TGTCTCAATCTCACCGTTGAATGTTTCTCCTCTAAGGAGGAATCCAGTGACACGCAAAGCTCGCCTCCA  
AACTTCTC

GAAGAACAAGAGGGTGTGACAATGAGGACGACGATGATGAGGATGACGAAGAGGATGAGGAGGACGAGGA  
GGAGGAAGAAGCTCTAAATGAAACAGCATCCGATGAGAGCAATGACGAGGAAGACGAAGAGGATGAGGAAG  
ACGTGAAA

CGTTAGGAGGAGAATCAATGAAATACGGAAAGCTAGGGACGAGGAAACTGGTGATAAAGAGCAAGAACAAG  
AAGAACAAGAGGGTGTGACAATGAGGACGACGATGATGAGGATGACGAAGAGGATGAGGAGGACGAGGAG  
GAGGAAGA

TCATATTATATATAAGAGAATGGTGCTTAGTGATTGCGTTGAAGCTGCCCTCGCCTACACTTTTCAGCTGCTG  
CTGGAGTGGATGATTGTGACGGAGAGGACCACCCACGTGCCAGAATTGTTTCACTGTCAAAACGCCCTA  
TGGAGAAG

AGAAGTAAAAGCTGAAGATGATACTGGTGAAGAAGAAGAGGATGACCCAGTGATCGAAGAGTTTCCATTGA  
AGATCTCCGGAGAAGAGGAGTCACTGCACGTGTTTTCAGTATGCTAATAGACCAAGGCTAGTAGGACGCAAA  
CCTGCTGA

GGCAGCATGCGGATTTTTGGAATCCCCATCGTGAAGGTAGAAGCCCAGATCAGGGTCTTTCTTCATGGAGGT  
AGAGACGGACGAGAGTGACGTGCTTGGGGTTGAGACGCCGTATGGATTGTACACTAATCGTTCGCTACTGA  
ACTTGAG

TTGTAGAGATCGTTAGGAGGAGAATCAATGAAATACGGAAAGCTAGGGACGAGGAAACTGGTGATAAAGAG  
CAAGAACAAGAAGAACAAGAGGGTGCTGACAATGAGGACGACGATGATGAGGATGACGAAGAGGATGAGGA  
GGACGAGG

ATTGGTCTACATAGCGGCAAGATGTTTGTGTACCTTCACATGTCAAAGAGGCGTCCAGGTGGTACTTCCC  
CATGCACTTGAATTGGTTTCAGCGTTCCCTCCATGGATAGTTCCTTATTGTACGGTAGCGACCCCAACTTGG  
TGGACGAA

TATGGCATTGGAGAATTGGATTCTCAGATTCTCAAACCTTCAACCTCTTGGTTCGTCGTCATTTGAAAGAGCA  
GTTCTCAGGTGTTTCTTGTTACTGCCGTCCCTTCCAGAAGAAATTCGACGATGACAATAGTCGGAGAGAT  
ATTCCGGA

TAGACTTAGATCTTTTCTTCCACAATACCGTGCTTCCAGATGGCAACAAATGGAGTGGTACCATCTTCACG  
GTAGTTCAACATGACAACCATGGCATCTGGGTCCATGGATTACCAGTGAAGAACTCCCAGTCCTTGAAG  
AACCAATA

GCTGCTGCTGCTGCTGCTTGAAGATTCCGCCGCTAGAACTGGACGAGGAAGATGAAGAAGAAGAGGAGGAGG  
AGGAGGAGGAGGAGGAGGAAGAAGAAGAAGATTTCTCTTCAATCTCCTTCTCCTTAACACTTAATTTT  
GGCACTTC

GACAAACTCAGCGTTGGGTCACTGTTTGGGACTTGATTTCTGACTGATCCGAGCGAGTCAGAACATGAAT  
ACAGGTGCATGTTTTCAGACAGTTCAGGACATCCCATCTCTCTCGCAACTGATCTTATTCAACAGCATGCCA  
AACGTTTC

CCCTTAATTTGACCAACTCACTTGTTGAAATACTAGGTTTTGTCTCTTGACAGGCTTCCAATAAATCGTTTT  
ATTGTGACCACAGCTGTCAGCTCAGAAGCAGCTGAAGTGCTTGTCTTTGTCTCGTGCACCACATCTTGCTG  
CAATAGAG

TATCAAATTCCTTCTTCAATAGCTACGAGCAGCTCGACAGTGTCCAAGGAGTCCAACCCCAAATCCTTGTGA  
AATTGGGTATCGCTGGAGATTTGCTTGGTGGCAATGTTGGGAGAGTTCTTATCAAACGCCTTGATAACATC  
AATGACCC

CAAGATGATGGAATTAGCCCAAACCGTATGCAAATCGACCGGTTTCTTAGTGAATGCAGAAGAACTGCGTT  
CCACCACTGACTCCAACAAGCCACCTTTTGC GCCTTGTCTTGTCAACGATCCGATTTCTTATTATCATA  
AAAGTGAC

GACTATTCAAGACCGAACACGAAAGCACCCTAACATTTACAATTCCTGAGGGCATTGTCTACTCACGTGG  
TGGTCAAATTCAGCTGAGGAAGATGTTCCAATGATTCATTCTTTAGAGCCAACTATGAGAAACAAATTTG  
AAATTTCA

TACAAATTCATTGGACGACGTGGTGTTATTGTCTAGATTAATTGGTCTACATAGCGGCAAGATGTTTGTGT  
CACCTTCACATGTCAAAGAGGCGTCCAGGTGGTACTTCCCATGCACTTGAATTGGTTTCAGCGTTCCCTCC  
ATGGATAG

TTTTGAGATAAATTGTTCTTCTTGGGCTTGAGCTTGAGCTTGTACTGGTTGTTGTTGCTGTTGCTGTTGCTG  
TTGTAGTTGTTGTTGTGGTTGTTGTGGTTGCTGTGGTTGTTGTTGTTGCTGTGGTTGCTGTGGTTGCTGTG  
GTTGCTGT

AAACGACAAATTTACCGTTTCTGCCATCTACTCTGATTTACCACAACAAGAAAGAGACACCATCATGAAGG  
AATTCAGAAGTGGTTCTTCCAGAATTTTGATCTCCACTGATTTGTTGGCTAGAGGTATCGATGTCCAACAA  
GTTTCTTT

CGCCTACACTTTCAGCTGCTGCTGGAGTGGATGATTGTGACGGAGAGGACCACCCACGTGCCAGAATTGT  
TTCCTGTCAAACGCCCTATGGAGAAGAGATGAACACGGTACTGTTCTCTGTAATGCATGTGGCCTCTT  
CCTGAAGT

CATTGGAAGCTTTAGGAAAGTCCACATTTGTCTTGGATGACTGGAAGAGAAAGTACTCCAACGACGACACC  
AGACCAGTTGCTTTGCCATGGTTCTGGGAACACTACAACCCTGAAGAATACTCCATCTGGAAGGTTGGTTA  
CAAATACA

GACATACCTCTGGTCGTTGAAGACAACCTCTGCCACGTGGGGCAAAGAAGAAGCATCAGTGACCTTGTCTC  
CTCACCAGGAGAGCCGATCTCCTTCGATGCGGTAGAACCCTTGCAAGTGCAATGGCTTGATCAGGAACTCC  
TCAACAGA

AGACCGACAATAGAACCCTCTTGACAATAACGATTTATCCAACACCTGATCATAATTGAAATGCTCGGCCCTC  
CTCGTTCTCTTACTGTCTCTTCATGAACAATGGTGTGCAAGTTATCAAACAAACCATTTCGGATCGAAAT  
GAACGATA

TGTAACGCTGAAGGATTTCGTATGTTAGCGACGACGTCGCCAACTCCACGGAACGCTACAACCTTGTCCCCTT  
CTCCGGAGGACGAAGACTTCGAAGGCCCCACTGAAGAAGAAATGCAGACTTTAAGGCACGTTGGTGGTAAA  
ATTCCTAT

CAAGTAAGCGTATTGACAGTCAGTGTCCAAGTTGACCTTGACAACACCGTTGTCAATACCAGTGTGGAATT  
CTTGGACAGTAGAACCAGGAAACCAGTGGAAAGACCAAGAACAATGGCTTTTCTTCTTGAACCAACTTGT  
TCTCTGGT

TTCTAAACAATAATTTAGAGCCAGCATGGTATCCGCGAGTTTACCACCTTTGTGAAACAAACACGCATACAT  
CGTCTCTGAAGACAGGGCATTCTGTCCAGAAAGTCAGACGCTAATTCACACTAAGTGGGATATCTGAT  
AATCTTTC

ATTGGTGATGAAACTCGACAACGCTAGTTACAGTTCTGTCTCTGCATCTTCATCTCCATCTCCCTCCACAC  
CGACGAAAAGTGGCAAGATGAGATCAAGATCATCTCACCTGTGCGTCCCAAGGCATACACTCCAAGCCCA  
AGGTCACC

CTGCTGCTTGAAGATTTCGCCGCTAGAACTGGACGAGGAAGATGAAGAAGAAGAGGAGGAGGAGGAGGA  
GGAGGAGGAAGAAGAAGAAGATTTCTTCTCAATCTCCTTCTCCTTAACACTTAATTTTTGGCACTTCTGT  
CAACTTTA

CCTAATTGACTTATTAACCAGAAGGAAATCAGAAGGCGAGTGTGTGACCTAAACAAGTGCCTCCGCTCT  
TGCAATCAGAGCAGCCAGAATATATTGCATGTGTCCCACCAGTGATAAAGTCTTCTCAAAGTGAAAGAAAC  
GTGCCACA

TCACTCATTAGCATTATGATGACGGCAACTACAACGCAGAATACTCAGGACACCAAGAAGTTCGAGGACCT  
GGTCATGAAGCTGTCAAACCTCGATGAATGAAGTAGTTCAAATCACCAGCGTGTGACAATGATCAAGCCAT  
TCAAGATC

GTCCTAGCATCTGCTCTGTTTGTCTAAATTTGTACACCAAAGGGATCCAATGTGGTGAGACCATACTCC  
TGTGAGTGATCTTTCCAGAAGGGTCACTTCCAGCTGGTCGTCAAGCATTATGAAGGTGGTAAAATGACCT  
CACATTTA

GTGATAAAGAGCAAGAACAAGAACAAGAGGGTGTGACAATGAGGACGACGATGATGAGGATGACGAA  
GAGGATGAGGAGGACGAGGAGGAGGAAGAAGCTCTAAATGAAACAGCATCCGATGAGAGCAATGACGAGGA  
AGACGAAG

ACTTCTCATGGCTACCCCAACGAAGCCAGACAAGATCTAGGAGATGTCTCCACCTTCCGAGCTACACTCTC  
ACATCTCTTACATAGACTGTGAAGTAAGTGATTGCACACAATCCAAAGAAGCACATCAAATAATATGTA  
AATATTAC

GTATTAGAAATGTTGGCGACGTAGTCGACGAAGAACCACACCAGCCAGATCCCTGGCGTGTGGAATGTGA  
TTTCCAATTGTACAGCAAGCCGTGACACCCTCCTTGAACACCAAGAGGTTAACTAACTCGTCCAACCTTGA  
AGGCCCT

ACACCCACACACCACACCCACACACACACACCCACACCCACACCCACACACACACACCCACACACACCACA  
CCCACACACCACACCCACACCCACACCCACACCCACACCCACACCCACACCCACACCCACACCCACACC  
CACACACA

ACCACACCCACACACACACACCCACACCCACACCCACACACACACACCCACACACACCACACCCACACACC  
ACACCCACACCCACACCCACACCCACACCCACACCCACACCCACACCCACACCCACACCCACACCCACACACC  
CACACAGT

CACACACACACCCACACCCACACCCACACACACACACCCACACACACCACACCCACACACCACACCCACAC  
CCACACCACACCCACACCCACACCCACACCCACACCCACACCCACACCCACACCCACACACACCCACACAGTAC  
CTCAACAC

CCCACACCCACACCCACACACACACACCCACACACACCACACCCACACACACCACACCCACACCCACACCCACA  
CCCACACACCCACACCCACACACCCACACCCACACCCACACCCACACACACCCACACAGTACCTCAACACAA  
CCCCTAAT

GGGTTAGGTGTGTGTGTGTGTGGGTGTGGTGTGTGGGTGTGGTGTGGTGTGGTGTGGTGTGGTGTGGTGTGGT  
GTGTGTGGGTGTGGTGGGTGTGGTGTGGTGTGGTGTGGTGTGGTGTGGTGTGGTGTGGTGTGGTGTGGTGTGGT  
GTCACCTT

TGTGTGTGTGTGTGGGTGTGGTGTGTGGGTGTGTGGGTGTGGTGTGGTGTGGTGTGGTGTGGTGTGGTGTGGT  
GTGGTGGGTGTGGTGTGGTGTGGTGTGGTGTGGTGTGGTGTGGTGTGGTGTGGTGTGGTGTGGTGTGGTGTGGT  
TGCATGCT

TATATACACCACACCCACACACCACACCCACACACACACACCCACACCCACACCCACACACACACACCCAC  
ACACACCACACCCACACACCACACCCACACCCACACCCACACCCACACCCACACCCACACCCACACCCACACCA  
CACCCACA

GTTGATCAGGGTTAGAGTAGGGTAGTGTTAGGGTTAGGTGTGTGTGTGTGTGTGGGTGTGGTGTGTGGGTG  
TGTGGGTGTGGTGTGGTGTGTGTGTGTGTGGTGTGGTGGGTGTGGTGTGGTGTGGTGTGGTGTGGTGTGGG  
TGTGGGTG

TGTGGGTGTGGTGTGTGGGTGTGTGGGTGTGGTGTGGTGTGGTGTGGTGTGGTGTGGTGTGGTGTGGTGTGGT  
TGGTGTGGGTGTGGGTGTGGGTGTGGGTGTGGTGTGGTGTGGTGTGGTGTGGTGTGGTGTGGTGTGGTGTGGT  
ATGGTGT

CAGTGACATATATATACACCACACCCACACACCACACCCACACACACACACCCACACCCACACCCACACAC  
ACACACCACACACACCACACCCACACACCACACCCACACCCACACCCACACCCACACCCACACCCACACCCACAC  
ACCCACAC

ACACCATCCAGCATGCAATACAGTGACATATATATACACCACACCCACACACCACACCCACACACACACAC  
CCACACCACACCCACACACACACACCCACACACACCACACCCACACCCACACCCACACCCACACCCACACCCAC  
CCACACAC

GTTAGAGTAGGGTAGTGTAGGGTTAGGTGTGTGTGTGTGTGTGGGTGTGGTGTGTGGGTGTGTGGGTGTG  
GTGTGGTGTGTGTGTGTGTGGTGTGTGGGTGTGGTGGGTGTGGTGTGGGTGTGGGTGTGGGTGTGGTGTG  
GGTGTGGT

GCATGCAATACAGTGACATATATATACACCACACCCACACACCACACCCACACACACACACCCACACCCAC  
ACCCACACACACACCCACACACACCACACCCACACACCACACCCACACCCACACCCACACCCACACCCAC  
ACACCCAC

GGTAGTGTAGGGTTAGGTGTGTGTGTGTGTGTGGGTGTGGTGTGTGGGTGTGTGGGTGTGGTGTGGTGTG  
TGTGTGTGGTGTGTGGGTGTGGTGGGTGTGGTGTGGGTGTGGGTGTGGGTGTGGTGTGGTGTGGTGTG  
GTATATCT

CACCCACACACACACACCCACACACACCACACCCACACACCACACCCACACCCACACCCACACCCACACACC  
CACACCCACACACCCACACCCACACCCACACCCACACACAGTACCTCAACACAACCCCTAATCC  
AACCCCTGA

TGAGAGACAGGTTGATCAGGGTTAGAGTAGGGTAGTGTAGGGTTAGGTGTGTGTGTGTGTGGGTGTGG  
TGTGTGGGTGTGTGGGTGTGGTGTGGTGTGTGTGTGGTGTGGTGTGGTGTGGTGTGGTGTGGTGTGGT  
TGGGTGTG

CACACACCCACACACACCACACCCACACACCACACCCACACCCACACCCACACCCACACACCCACACCCACA  
CACCCACACCCACACCCACACACACCACACAGTACCTCAACACAACCCCTAATCCAACCCTGATG  
AACCTGCC

CACACACCACACCCACACACCACACCCACACCCACACCCACACCCACACCCACACCCACACCCACACCCACACC  
ACACCCACACCCACACACAGTACCTCAACACAACCCCTAATCCAACCCTGATGAACCTGCCTC  
CAAACCTA

GTGTGTGGGTGTGTGGGTGTGGTGTGGTGTGTGTGTGGTGTGTGGGTGTGGTGGGTGTGGTGTGGGT  
GTGGGTGTGGGTGTGGGTGTGGTGTGGTGTGTATATCTATGTACCTTATTGCATGCTGGATGGTGTAG  
ACAAGGCC

GAGGGTAAGTTGAGAGACAGGTTGATCAGGGTTAGAGTAGGGTAGTGTAGGGTTAGGTGTGTGTGTGTGT  
GTGGGTGTGGTGTGTGGGTGTGGTGTGGTGTGTGTGTGGTGTGTGGGTGTGGTGGGTGTGGTGGGTGT  
GGTGTGGG

GCCTTGTCTAACACCATCCAGCATGCAATACAGTGACATATATATACACCACACCCACACACCACACCCAC  
ACACACACACCCACACCCACACACACACACACCCACACACACCACACCCACACACCACACCCACACCCACACC  
CACACCAC

TCTTCAAAGCCGGTTGATGGTCTCCGCTGCCGTTTCATGATACGTGTCTTCATGACGTCTGCTGGAGAGCAC  
ACAGTGGTGGCCACCAGGCCAGCCAACAGGGACGCTGTCAAGTGTGTATAGTTCTTGGATGCGTCGAAATC  
TAATTTTG

ACCCACACACCACACCCACACCCACACCCACACCCACACCCACACCCACACCCACACCCACACCCACACCCACAC  
CCACACACACCCACACAGTACCTCAACACAACCCCTAATCCAACCCTGATGAACCTGCCTCAAACCTACC  
CTCCATTA

ACTAAGTTTACAACAACAAAGCAGCGGCACCAGCCAACAAAGCACCAGCAGCTGGCAAAGCCTTAGCAGCA  
GCACCAGTGTAAAGAGGTGACAGAGTGAGTTGGAGCAGCAGAGGTGGTGTCTTTGGAGCTTCAGTAGAGGT  
AACTGGAG

GCAGCGGCACCAGCCAACAAAGCACCAGCAGCTGGCAAAGCCTTAGCAGCAGCACCAGTGTAAAGAGGTGAC  
AGAGTGAGTTGGAGCAGCAGAGGTGGTGTCTTTGGAGCTTCAGTAGAGGTAACCTGGAGCAGCAGTAGAAG  
TACCGTTC



GGTCATCATGCCGTGCTGTTGGTACTGTCCATTCTGTGGAGGTGGTACTGAAGCAGGTTGAGGAGAGACAT  
GATGATGGTTCTCTGGAACAGCTGATGTCCCAGGTGTTGTCTCTTCTTGAGAATTAACCTTAGTGGAATCT  
CTATCAA

CTTTGTTTGGGGTCATCATGCCGTGCTGTTGGTACTGTCCATTCTGTGGAGGTGGTACTGAAGCAGGTTGA  
GGAGAGACATGATGATGGTTCTCTGGAACAGCTGATGTCCCAGGTGTTGTCTCTTCTTGAGAATTAACCTT  
AGTGGAAT

CCGTGCTGTTGGTACTGTCCATTCTGTGGAGGTGGTACTGAAGCAGGTTGAGGAGAGACATGATGATGGTT  
CTCTGGAACAGCTGATGTCCCAGGTGTTGTCTCTTCTTGAGAATTAACCTTAGTGGAATCTCTATCAAATT  
CCGGTAA

TATACTTCACGCTGTTTCATTCTATGTTCTGACAATTCTTTGTTCTCTGTTTCGACTTGGGGGGCAACTGG  
TTGTTCCACATCTGGGTCTTGTTCCTCAGCTGTGGCGTTGACTCAACTTCTTCTTCTGGCTTCATGGAAT  
CTCTACAT

GTCTAACACCATCCAGCATGCAATACAGTGACATATATATACACCACACCCACACACCACACCCACACCCAC  
ACCCACACCCACACACACCACACACCACACACTCTCTTACATCTACCTTTACTCTCGCTGTCACACCTTA  
CCGGCTT

GGCGATCGCTAAGCTTAATCAACTTCTTCGACAGTTGGACCTTCAGCTTCTGGAGCTGGAGGAGCACCACC  
TGGGAAACCACCTGGAGCTGCGCCTTCTGGAGCACCACCAGCTTGGTACAATTTAGACATGATTGGGTTGG  
CAACCTCT

CACACCCACACCCACACCCACACCCACACACCCACACACCCACACACCCACACACCCACACACACACAC  
CCACACAGTACCTCAACACAACCCCTAATCCAACCCTGATGAACCTGCCTCCAAACCTACCCTCCATTACC  
CTACCTCT

GTGTGGGTGTGGTGTGGTGTGTGTGTGTGTGGTGTGTGGGTGTGGTGGGTGTGGTGTGGGTGTGGGTGTGG  
GTGTGGGTGTGGGTGTGGTGTGTATATCTATGTCACCTTATTGCATGCTGGATGGTGTAGACAAGGCCGT  
AGGGACAT

GTGTTATTAACGGACCCAGCACAGTGGTGTATCCATAATTTGCTGCTGCAGGGCCTTCAGGCCCTGCAC  
GCTAGCACACACCTTGGCGTCTGCAGTAGTGGTCTCCTTCTCAGTTTTGCTGCACCATTTGAAAGTGTGTTG  
TCCACATT

TGTCCCTACGGCCTTGTCTAACACCATCCAGCATGCAATACAGTGACATATATATACACCACACCCACACA  
CCACACCCACACACACACCCACACCCACACACACACACACCCACACACACCACACCCACACACCA  
CACCCACA

CTACGGCCTTGTCTAACACCATCCAGCATGCAATACAGTGACATATATATACACCACACCCACACACCACA  
CCCACACCACACCCACACCCACACACACCACACACTCTCTTACATCTACCTTTACTCTCGCTG  
TCACACCT

GTTGGTTGGTGGGAACTGGAAGTGAAAGTTCTGTTCTTTAGGGTGCAGCGGTTGCTGTTGCTGTTGCTGTT  
GCTGTTGCTGCTGTGGTTGGATTGATGCTTGTGATGTTTGTGGTGCCTGTGGTGTGTTGGTACAGTTTTG  
CTGCCAGT

TCGGCAAGGATCTTCAAAGCCGGTTGATGGTCTCCGCTGCCGTTTCATGATACGTGTCTTCATGACGTCTGC  
TGGAGAGCACACAGTGGTGGCCACCAGGCCAGCCAACAGGGACGCTGTCAAGTGTGTATAGTTCTTGGATG  
CGTCGAAA

CAACAACAAAGCAGCGGCACCAGCCAACAAGCACCAGCAGCTGGCAAAGCCTTAGCAGCAGCACCAGTGT  
AAGAGGTGACAGAGTGAGTTGGAGCAGCAGAGGTGGTGTCTTTGGAGCTTCAGTAGAGGTAACCTGGAGCA  
GCAGTAGA

CAGCCAACAAAGCACCAGCAGCTGGCAAAGCCTTAGCAGCAGCACCAGTGTAAGAGGTGACAGAGTGAGTT  
GGAGCAGCAGAGGTGGTGTCTTTGGAGCTTCAGTAGAGGTAAGTGGAGCAGCAGTAGAAGTACCGTTCTT  
TGGGGCTT

GAAGCCATAGCTTTGTTTGGGGTCATCATGCCGTGCTGTTGGTACTGTCCATTCTGTGGAGGTGGTACTGA  
AGCAGGTTGAGGAGAGACATGATGATGGTTCTCTGGAACAGCTGATGTCCCAGGTGTTGTCTCTTCTTGAG  
AATTAACC

CGGACCCACGCACAGTGGTGTATCCATAATTTGCTGCTGCAGGGCCTTCAGGCCCTGCACGCTAGCACAC  
ACCTTGGCGTCTGCAGTAGTGGTCTCCTTCTCAGTTTTGCTGCACCATTTGAAAGTGTGTTGTCCACATTCT  
ACTGAAGA

CCCACACCACACCCACACACCCACACACCCACACACCCACACCACACCCACACCCACACACACCCACACAGTA  
CCTCAACACAACCCCTAATCCAACCCTGATGAACCTGCCTCCAAACCTACCCTCCATTACCCTACCTCTCC  
ACTCGTTA

TGCCCAGTTAGAAGCCATAGCTTTGTTTGGGGTCATCATGCCGTGCTGTTGGTACTGTCCATTCTGTGGAG  
GTGGTACTGAAGCAGGTTGAGGAGAGACATGATGATGGTTCTCTGGAACAGCTGATGTCCCAGGTGTTGT  
TCTTCTTG

AGCACCAGCAGCTGGCAAAGCCTTAGCAGCAGCACCAGTGTAAGAGGTGACAGAGTGAGTTGGAGCAGCAG  
AGGTGGTGTCTTTGGAGCTTCAGTAGAGGTAAGTGGAGCAGCAGTAGAAGTACCGTTCTTTGGGGCTTCA  
GTGGTCAA

TCTATGTTCTGACAATTCTTTGTTTCTCTGTTTCGACTTGGGGGGCAACTGGTTGTTCCACATCTGGGTCTT  
GTTTCTTCAGCTGTGGCGTTGACTCAACTTCTTCTTCTGGCTTCATGGAATCTCTACATTCTTGTGGAAA  
GAGTCGAT

TATGAGGCTAGTTGGTTGGTGGGAACTGGAAGTGAAAGTTCTGTTCTTTAGGGTGCAGCGGTTGCTGTTGC  
TGTTGCTGTTGCTGTTGCTGCTGTGGTTGGATTGATGCTTGTGATGTTTGTGGTGCCTGTGGTGTGTTGG  
TACAGTTT

ATCATCGACGTCTTCTACGCAAACGTCAACATCATCTTCATCCTCACTGTCGTCAACGCCGTCTCTTCAT  
CATCCCATCAACAATCACTTCTGCACCTTCAACCTCCTCCACACCATCCACTACTGCCTATAATCAAGGA  
AGCACTAT

GCTGTTTTATTCTATGTTCTGACAATTCTTTGTTTCTCTGTTTCGACTTGGGGGGCAACTGGTTGTTCCACA  
TCTGGGTCTTGTCTTCTCAGCTGTGGCGTTGACTCAACTTCTTCTTCTGGCTTCATGGAATCTCTACATT  
TTGTTGGA

TGGAACATCCTAGAATTAGGAATTTCTGTTTGACCGTTCTCGTTCCCCTCTTCTCCATTGCTCACATCAGA  
CTCAGGCTCAGACTCAGACTCAGACCCAGATCCATCGTCACCTGCCAGAAGAGCGTCCCCAAACAGATTAC  
CAGAATTC

CATCCCAGCAATGATCTGAGGAAACCACATCACTACACATCTGGCTGGTGGATGGCTCTGGCCAAACACA  
AAGAGAGAGAAACGGCTGGGTTCAAAGCCCCACCAGAAACACCAGATAGAAAACATCACAGAGAAACCGAA  
ACCAAGGG

TCTCCGCTGCCGTTTCATGATACGTGTCTTCATGACGTCTGCTGGAGAGCACACAGTGGTGGCCACCAGGCC  
AGCCAACAGGGACGCTGTCAAGTGTGTATAGTTCTTGGATGCGTCGAAATCTAATTTTGTGACCAAGTAGT  
TCTTAAAC

CGGTTGATGGTCTCCGCTGCCGTTTCATGATACGTGTCTTCATGACGTCTGCTGGAGAGCACACAGTGGTGG  
CCACCAGGCCAGCCAACAGGGACGCTGTCAAGTGTGTATAGTTCTTGGATGCGTCGAAATCTAATTTTGTG  
ACCAAGTA

AATTTCTGTTTGACCGTTCTCGTTCCCCTCTTCTCCATTGCTCACATCAGACTCAGGCTCAGACTCAGACT  
CAGACCCAGATCCATCGTACCTGCCAGAAGAGCGTCCCCAAACAGATTACCAGAATTCTGTACTTCCATG  
TTGTATAC

TATTTTACAGGGCGATCGCTAAGCTTAATCAACTTCTTCGACAGTTGGACCTTCAGCTTCTGGAGCTGGAG  
GAGACCACCTGGGAAACCACCTGGAGCTGCGCCTTCTGGAGCACCACCAGCTTGGTACAATTTAGACATG  
ATTGGGTT

TAGAATTAGGAATTTCTGTTTGACCGTTCTCGTTCCCCTCTTCTCCATTGCTCACATCAGACTCAGGCTCA  
GACTCAGACTCAGACCCAGATCCATCGTACCTGCCAGAAGAGCGTCCCCAAACAGATTACCAGAATTCTG  
TACTTCCA

TAGGGTAATGGAGGGTAAGTTGAGAGACAGGTTGATCAGGGTTAGAGTAGGGTAGTGTAGGGTTAGGTGT  
GTGTGTGTGTGGGTGTGGTGTGTGGGTGTGTGGGTGTGGTGTGTGTGTGTGGTGTGTGGGTG  
TGGTGGGT

ATAATAATAAACTAAGTTTACAACAACAAAGCAGCGGCACCAGCCAACAAAGCACCAGCAGCTGGCAAAGC  
CTTAGCAGCAGCACCAGTGTAAAGAGGTGACAGAGTGAGTTGGAGCAGCAGAGGTGGTGTCTTTGGAGCTT  
CAGTAGAG

CGGCACAGCGTCGGCAAGGATCTTCAAAGCCGGTTGATGGTCTCCGCTGCCGTTTCATGATACGTGTCTTCA  
TGACGTCTGCTGGAGAGCACACAGTGGTGGCCACCAGGCCAGCCAACAGGGACGCTGTCAAGTGTGTATAG  
TTCTTGA

GTACTTCAAGTATACTTACGCTGTTTCATTCTATGTTCTGACAATTCTTTGTTCCCTCTGTTTCGACTTGGG  
GGGCAACTGGTTGTTCCACATCTGGGTCTTGTTCCTCAGCTGTGGCGTTGACTCAACTTCTTCTTCTGGC  
TTCATGGA

CATCGGACAACAAGTTCATAACGTAACCTCTCTTGATAGCATCTTCAACAGTGAACAAGTTCCTGCCT  
GGAACCAACCGTCTTCGATGGCAGCCTTCCAAGAAGCACCATCTTTACGGACACCAATGATAACGTTCAA  
ACGTTGT

TGTATTTCTATATGAGGCTAGTTGGTTGGTGGGAAGTGAAGTGAAGTTCGTTCTTTAGGGTGCAGCGG  
TTGCTGTTGCTGTTGCTGTTGCTGTTGCTGCTGTGGTTGGATTGATGCTTGTGATGTTTGTGGTGCCTGTG  
GTGCTTGT

TATAGGATTTGGAGTAGGGTAGTAAATATAAGGATTCTCCTGTTGCTGTTGCTGTTGTTGGTCTTCTTGT  
GTTGTTGTTGTTGCTGTTGCTGTTGTTGCTGGGGAGCAGAGAGTGGTGGAGGTGGCATAAACATCATTGGG  
TTGGGGTA

TCTACTCTACACTTGGTCTTGAGATTGAGAGGTGGTGGTAAGAAGAGAAAGAAGAAGGTCTACACCACCC  
AAAGAAGATCAAGCACAAGCACAAGAAGGTCAAGTTGGCTGTCTTGTCTACTACAAGGTGCATGCTGAAG  
GTAAGGT

TACCCACAGTCATCAACTGGTCCTTGTGGAAATCCTGTTGCTGCTGCTGCTGCTGCTCCTGTTGTTGTTGT  
TGTTGTTGAAGCTGTCTCTTTGGGACGAGGCTGCTTGCCATTCCAGTTGTGCGTCCATTAAGTCTTGT  
GTTCTGT

AGAATCCTCTTCCACTTATGTCTCTTCGAGCAAGCAAGCTTCTCCTACTAGCGAGGCTCACTCTTCCAGTG  
CTGCCTCTTCGACCGTGTCCCAAGAAACAGTCTCCTCTGCTCTACCAACTTCTACCGCGTTATTTCTACT  
TTCTCTGA

GGAGTAGGGTAGTAAATATAAGGATTCTCCTGTTGCTGTTGCTGTTGTTGGTCTTCTTGTGTTGTTGTTG  
TTGCTGTTGCTGTTGTTGCTGGGGAGCAGAGAGTGGTGGAGGTGGCATAAACATCATTGGGTTGGGGTAGG  
CAAACGGG

AAGCTTAATCAACTTCTTCGACAGTTGGACCTTCAGCTTCTGGAGCTGGAGGAGCACCACCTGGGAAACCA  
CCTGGAGCTGCGCCTTCTGGAGCACCACCAGCTTGGTACAATTTAGACATGATTGGGTTGGCAACCTCTTG  
CAATTCCT

GGTGTGGTGTGTGTGTGTGGTGTGTGGGTGTGGTGGGTGTGGTGTGGGTGTGGGTGTGGGTGTGGGTGT  
GGGTGTGGTGTGTATATCTATGTCACCTTATTGCATGCTGGATGGTGTTAGACAAGGCCGTAGGGACATAT  
AGCATCTA

GGGAACTGGAAGTAAAAGTTCTGTTCTTTAGGGTGCAGCGGTTGCTGTTGCTGTTGCTGTTGCTGTTGCTG  
CTGTGGTTGGATTGATGCTTGTGATGTTTGTGGTGCCTGTGGTGTGTTGGTACAGTTTTGCTGCCAGTTT  
GCTGCGAG

GGCCCTCTTTGCGGACAGCGTCGGCAAGGATCTTCAAAGCCGGTTGATGGTCTCCGCTGCCGTTTCATGATA  
CGTGTCTTCATGACGTCTGCTGGAGAGCACACAGTGGTGGCCACCAGGCCAGCCAACAGGGACGCTGTCAA  
GTGTGTAT

CTGATTTCGCATACCCACAGTCATCAACTGGTCCTTGTGGAAATCCTGTTGCTGCTGCTGCTGCTGCTCCTG  
TTGTTGTTGTTGTTGTTGTTGAAGCTGTCTCTTTGGGACGAGGCTGCTTGCCATTCCAGTTGTGCGTCCATTA  
AGTCTTGT

CACCAGCAGCCATCCAGCAATGATCTGAGGAAACCACATCACTACACATCTGGCTGGTGGATGGCTCTG  
GCCAAACACAAAGAGAGAGAAAACGGCTGGGTTCAAAGCCCCACCAGAAACACCAGATAGAAAACATCACAG  
AGAAACCG

GACAATTCTTTGTTCCCTCTGTTTCGACTTGGGGGGCAACTGGTGTGTTCCACATCTGGGTCTTGTCTTCTCAG  
CTGTGGCGTTGACTCAACTTCTTCTTCTGGCTTCATGGAATCTCTACATTCTTGTGGAAAGAGTCGATGA  
TTTCCAAT

CTGGTAACGAGGGTGCTATCAGAGACAAGACCGCTGGTAGAAGAAACAACAGATCAAAGGATGTCACTGAC  
TCTGCCACCACCAAGAAGTCCAACACCAGAAGGGCCACTGACCGCCACTCTAGAACTGGTAAGACTGACAC  
CAAGAAGA

CATCAACTGGTCCTTGTGGAAATCCTGTTGCTGCTGCTGCTGCTGCTCCTGTTGTTGTTGTTGTTGTTGAA  
GCTGTCTCTTTGGGACGAGGCTGCTTGCCATTCCAGTTGTGCGTCCATTAAGTCTTGTGTTGTTGTTGTTGAA  
TAGTGTGT

AGATATTTTGGATTGCTTACTGGACGCTGAGGGTTTGTGTTGTCGTGAGTGTGGAGGAGGAGGAGGAGCCG  
ATGGTACTGACGTTGCAACCGAAGGAGGAGGAGGAGGTGGTAGTGGTGTAAAGGAATAGATGATGCTGAC  
AAGGCAGA

AACTGGATGAAGATATTTTGGATTGCTTACTGGACGCTGAGGGTTTGTGTTGTCGTGAGTGTGGAGGAGGA  
GGAGGAGCCGATGGTACTGACGTTGCAACCGAAGGAGGAGGAGGAGGTGGTAGTGGTGTAAAGGAATAGA  
TGATGCTG

TCTTCTACGCAAACGTCAACATCATCTTCATCCTCACTGTCGTCAACGCCGTCCTCTTCATCATCCCCATC  
AACAATCACTTCTGCACCTTCAACCTCCTCCACACCATCCACTACTGCCTATAATCAAGGAAGCACTATCA  
CCAGTATT

CTTGGATAAGATGGTCAGACGATACTTGTACAGTAGGCCCTCGCTGCTGCGACTGCGACTGCGACTGTGAC  
TGTGACTGTGACTGGGGTTGTGGTTGTGGTTGTGACTGTTGTTGTTGTTGCTGCTGTTGTTTTTTCTGCCT  
GGAAGTAT

TGACCGTTCTCGTTCCCCTCTTCTCCATTGCTCACATCAGACTCAGGCTCAGACTCAGACTCAGACCCAGA  
TCCATCGTCACCTGCCAGAAGAGCGTCCCCAAACAGATTACCAGAATTCTGTACTTCCATGTTGTATACAG  
CTTGTGCG

CAAGTTCATAACGTAACCTACCTCTCTTGATAGCATCTTCAACAGTGAACAAGTTCTTGCCTGGAACCCAAC  
CGTCTTCGATGGCAGCCTTCCAAGAAGCACCATCTTTACGGACACCAATGATAACGTTCAAACCGTTGTCT  
CTCAAGTT

GAGTGGGGAGTAGGGTAATGGAGGGTAAGTTGAGAGACAGGTTGATCAGGGTTAGAGTAGGGTAGTGTTAG  
GGTTAGGTGTGTGTGTGTGTGTGGGTGTGGTGTGTGGGTGTGTGGGTGTGGTGTGTGTGTGTGTGTGTGG  
TGTGTGGG

GACTTGGTCTTGTGCGAACACGCCATACTGGTCCAGTCCATCACAGAACCGCAGTAGGGGTTTCCCTTGCC  
AGGAACCCATAAGTCAGCTGAGCCTGTGTCTAACAGCACAGTGAGGTTTTGTGAAGGTGTACCAATGGCTA  
GCTCAACA

GATTGCTTACTGGACGCTGAGGGTTTTGTTTGTCTGAGTGTGGAGGAGGAGGAGCCGATGGTACTGA  
CGTTGCAACCGAAGGAGGAGGAGGAGGTGGTAGTGGTGTCTAAAGGAATAGATGATGCTGACAAGGCAGAGG  
ATGTTGAA

ATGGTCAGACGATACTTGTACAGTAGGCCCTCGCTGCTGCGACTGCGACTGCGACTGTGACTGTGACTGTG  
ACTGGGGTTGTGGTTGTGGTTGTGACTGTTGTTGTTGTTGCTGCTGTTGTTTTTCTGCCTGGAAGTATCT  
TTCACAGC

ACTTTTGTCTGTGTATTTCTATATGAGGCTAGTTGGTTGGTGGGAAGTGAAGTGAAGTTCTGTTCTTTAG  
GGTGCAGCGTTGCTGTTGCTGTTGCTGTTGCTGTTGCTGCTGTGGTTGGATTGATGCTTGTGATGTTTGT  
GGTGCCTG

CCCAGGAAGAAGTGGATGAAGATATTTTGGATTGCTTACTGGACGCTGAGGGTTTTGTTTGTCTGAGTGT  
TGGAGGAGGAGGAGGAGCCGATGGTACTGACGTTGCAACCGAAGGAGGAGGAGGAGGTGGTAGTGGTGCTA  
AAGGAATA

TACCACTGAAAGTACCAACTCCAGCACTAATGCTACTACCACTGCCAGCACCAACGTCAGGACTAGTGCTA  
CTACCACTGCCAGCATCAACGTCAGGACTAGTGCGACTACCACTGAAAGTACCAACTCCAACACTAGTGCT  
ACTACCAC

TCCACTTATGTCTCTTTCGAGCAAGCAAGCTTCTCCACTAGCGAGGCTCACTCTTCCAGTGCTGCCTCTTC  
GACCGTGTCCCAAGAAACAGTCTCTCTGCTCTACCAACTTCTACCGCCGTTATTTCTACTTTCTCTGAAG  
GTTCTGGT

AGTGAAGTTCTGTTCTTTAGGGTGCAGCGGTTGCTGTTGCTGTTGCTGTTGCTGTTGCTGCTGTGGTTGG  
ATTGATGCTTGTGATGTTTGTGGTGCCTGTGGTGTGTTGTTGTTGCTGTTGCTGTTGCTGCTGTGGTTGG  
TGTAATTA

GAAATTGAAGATTTGGTTGACAGAATTGAAAACCCAGAAAAGTACGCTGCTGCTGCTCCAGCTGCTACCTC  
CGCTGCTTCCGGTGACGCTGCTCCAGCTGAAGAAGCTGCTGCTGAAGAAGAAGAATCTGATGACGACA  
TGGGTTTC

ACAGGGTAACGAGTGGGGAGTAGGGTAATGGAGGGTAAGTTGAGAGACAGGTTGATCAGGGTTAGAGTAGG  
GTAGTGTTAGGGTTAGGTGTGTGTGTGTGTGGGTGTGGTGTGTGGGTGTGGTGTGGTGTGGTGTGGTGTGT  
GTGTGTGT

AAATTCATATCTTGGATAAGATGGTCAGACGATACTTGTACAGTAGGCCCTCGCTGCTGCGACTGCGACTG  
CGACTGTGACTGTGACTGTGACTGGGGTTGTGGTTGTGGTTGTGACTGTTGTTGTTGTTGCTGCTGTTGTT  
TTTTCTGC

GATTACCACTGAAAGTACCAACTCCAGCACTAATGCTACTACCACTGCCAGCACCAACGTCAGGACTAGTG  
CTACTACCACTGCCAGCATCAACGTCAGGACTAGTGCGACTACCACTGAAAGTACCAACTCCAACACTAGT  
GCTACTAC

TTGAGCCGTCTGGAAACATCGCTGCTATATCACCAATCAATCCGACTGCTGCTCTTGAGGTAGCATCCTCA  
CTGTACAGCTGAGGATCTTCTGCAACTTGTGCAATGAACTGGAATATAGTACCAACATAAGGGAACAGAGC  
TTCAGGTT

TCACATCCTCGGATCCAATCTTAGTAACAGCATCGCCACTATCGCCTGCACCGCCAGCACCAGCAGCAGCA  
GCCTTTTGCTCATCATGCTGGTGTCTATTCTGTCGGTGTAGCAGTCTTATCCATTCTTGCGGCGTGTCTCTC  
ACCATCGT

CCATTGCGACAGTGTTCGAAGGGACTCGTGCTCTTTCGATTGCCATCACTGCACCGAACACGATGATGTGT  
ACACATGTTCCAAACTTTCCAGACATTTGACGATGGTCTTCTGCTTCCACTACTAAATTATTGGACCGG  
TTGAAGCA

CTGTTCTTTAGGGTGCAGCGGTTGCTGTTGCTGTTGCTGTTGCTGTTGCTGTTGCTGTTGCTGTTGCTGTTG  
GTGATGTTTTGTGGTGCCTGTGGTGTCTTGTGGTACAGTTTTGCTGCCAGTTTTGCTGCGAGTATGTAATTATG  
GGGTGAGC

GAATGTATAAATAATAATAAACTAAGTTTACAACAACAAAGCAGCGGCACCAGCCAACAAAGCACCAGCAG  
CTGGCAAAGCCTTAGCAGCAGCACCAGTGAAGAGGTGACAGAGTGAGTTGGAGCAGCAGAGGTGGTGTTC  
TTTGGAGC

AATTGTTTGGATTGAGCCGTCTGGAAACATCGCTGCTATATCACCAATCAATCCGACTGCTGCTCTTGAGGT  
AGCATCCTCACTGTACAGCTGAGGATCTTCTGCAACTTGTGCAATGAACTGGAATATAGTACCAACATAAG  
GGAACAGA

GAGTGTCTTTGTACTTCAAGTATACTTTCACGCTGTTTTCATTCTATGTTCTGACAATTCTTTGTTTCTCTGT  
TCGACTTGGGGGGCAACTGGTTGTTCCACATCTGGGTCTTGTTCCTTTCAGCTGTGGCGTTGACTCAACTTC  
TTCTTCTG

GTCATCGACGGTGACGGTAGCGGTGGAAACCAAAGCTGGGGAGACAGTTTTCAGAACAGACGTGGTCTTTCAC  
AAGAAGTGATGGTGACCAAAGTGGTAGATTCTTGGCTGACAGTAGCAGTGGTAAACGTTAGCAGCGGCAGAA  
GCGACAGC

ACTCTTGCCCTGAAGAGGACTTCTTTGTCGCTATCCTTAGCCTCATCCAAGTCAACAAACTTGACACGCTT  
CTGACCAGTTCTGTGAGGTCACGAGACTGGATCAATGGCAACTTACCCTAGTTGTCTTTGCGGTGTCTT  
CGGCAGCG

TGATGTACACCCTCTCATCGAGATTGAGTTTTCAATAAATCCAAAGGTGTCTCCATTTTTCTTGAGTGTGCGT  
GATGTTGTGTGTGTGTGTATTTATCTGCGTGTCTCTCCCCTGTTGTATTGGTTGCTAGAATGGATGGAA  
ACATCCTG

GATTGAGCGGCATCGGACAACAAGTTTCATAACGTAACCTACCTCTTTGATAGCATCTTCAACAGTGAACAA  
GTTCTTGCCTGGAACCAACCCTTTCGATGGCAGCCTTCCAAGAAGCACCATCTTTACGGACACCAATGA  
TAACGTTT

CTATATGTCCCTACGGCCTTGTCTAACACCATCCAGCATGCAATACAGTGACATATATATACACCACACCC  
ACACACCACACCCACACCCACACCCACACACACCACACCCACACACTCTTACATCTACCTTT  
ACTCTCGC

CAACTTCTGAATCATCGACGTCTTCTACGCAAACGTCAACATCATCTTCATCCTCACTGTCGTCAACGCCG  
TCCTCTTCATCATCCCATCAACAATCACTTCTGCACCTTCAACCTCCTCCACACCATCCACTACTGCCTA  
TAATCAAG

ACCCACACACCCACACCCACACACCCACACCCACACCCACACCCACACACACCACACAGTACCTCAACACA  
ACCCCTAATCCAACCCTGATGAACCTGCCTCAAACCTACCCTCCATTACCCTACCTCTCCTACTCGTTACC  
CTGTCTCA

TCTATAGAAGATGCCAATGAACCTGCGGAGGATTCCAATGAACCTGTGGAGGATTCCAACAAACCTGTGAA  
GGATTCCAACAAACCTGTGGAGGATTCCAACAAACCTGTGGAGGATTCCAACAAACCTGTGGAGGATTCCA  
ACAAACCT

GAATGCCAGAATTGATTCCAGTCTTGTCTGAAACCATGTGGGACACCAAGAAGGAAGTCAAGGCTGCTGCT  
ACTGCCGCCATGACCAAGGCTACCGAACTGTTGACAACAAGGATATTGAACGTTTCATTCCAAGTTTGAT  
TCAATGTA

ACTAATAGTAATCTTGGTCTGAACATTGTGTTCCGTCTGATTGAAACTGAGGACACCAATGTCAGATTGAC  
CATTGTGGTGACTTCTAGAACGTTCCCTCGAGTGCAGGAGGTGATTAACCAGATTAAGATTTTTACAACA  
AATCAGGC

GTAATGGCTGTGCATTTCAGCGATTAAAGTCCCGTCATCAAGTTCAAGCACTGGCACTGTGCCTGAATAGTT  
CTTGGCAAGAAATTCAGGCTTCTTGTGCTCTCCCTTCCAGAGGTTGATCCTCACAAATTGCACACTTGATA  
GCATGTTT

AATTCTCAACAAGAGACAACACCTGGGACATCAGCTGTTCCAGAGAACCATCATCATGTCTCTCCTCAACC  
TGCTTCAGTACCACCTCCACAGAATGGACAGTACCAACAGCACGGCATGATGACCCCAACAAAGCTATGG  
CCTCTAAC

CTAGCGGCACCACCAGCAGCCATCCAGCAATGATCTGAGGAAACCACATCACTACACATCTGGCTGGTGA  
GATGGCTCTGGCCAAACACAAAGAGAGAGAAACGGCTGGGTTCAAAGCCCCACCAGAAACACCAGATAGAA  
AACATCAC

ATGAAATCGAGGCTAGTTTTCAAGATAACTTGTCTCATCTCATGGCTGAATCCAGTGAGTTCCATGTAGCCA  
CCCCTTTGACCACATTCACCAGAAACACCCTTAGAAGTCGAATGCAAAGAAGCTAGCTGAACATTATCGAA  
TTTACCTG

TTTTGACAGGTATAGGATTTGGAGTAGGGTAGTAAATATAAGGATTCTCCTGTTGCTGTTGCTGTTGTTGG  
TCTTCTTGTGTTGTTGTTGTTGTTGCTGTTGCTGTTGTTGCTGGGGAGCAGAGAGTGGTGGAGGTGGCATAAA  
CATCATTG

GACCCGCTGTCTGATTTCGCATACCCACAGTCATCAACTGGTCTTGTGGAAATCCTGTTGCTGCTGCTGCT  
GCTGCTCCTGTTGTTGTTGTTGTTGTTGAAGCTGTCTCTTGGGACGAGGCTGCTTGCCATTCCAGTTGT  
GCGTCCAT

GAACGTGGACGACTTGGTCTTGTGCGAACACGCCATACTGGTCCAGTCCATCACAGAACCGCAGTAGGGGT  
TTCCCTTGCCAGGAACCCATAAGTCAGCTGAGCCTGTGTCTAACAGCACAGTGAGGTTTTGTGAAGGTGTA  
CCAATGGC

ACTAACGAACCATTGACTGAAATCAAGAACGTTATTGTCTCTAACAGAGTTGCTGCTCCAGCCAGAGCTGG  
TGCCGTTGCTCCAGAAGACATCTGGGTTAGAGCCGTCAACACTGGTATGGAACCAGGTAAGACTTCTTTCT  
TCCAAGCT

ACTTGGTCTTGAGATTGAGAGGTGGTGGTAAGAAGAGAAAGAAGAAGGTCTACACCACCCCAAAGAAGATC  
AAGCACAAGCACAAGAAGGTCAAGTTGGCTGTCTTGTCTACTACAAGGTCGATGCTGAAGGTAAGGTTAC  
CAAATTGA

TCGACATCCGCAACTTCTGAATCATCGACGTCTTCTACGCAAACGTCAACATCATCTTCATCCTCACTGTC  
GTCAACGCCGCTCCTCTTCATCATCCCCATCAACAATCACTTCTGCACCTTCAACCTCCTCCACACCATCCA  
CTACTGCC

GGCGAGGACTTGTGGCTTTGAACGTGGACGACTTGGTCTTGTGCGAACACGCCATACTGGTCCAGTCCAT  
CACAGAACCGCAGTAGGGGTTTTCCCTTGCCAGGAACCCATAAGTCAGCTGAGCCTGTGTCTAACAGCACAG  
TGAGGTTT

TGCATT CAGCGATTAAAGTCCCGTCATCAAGTTCAAGCACTGGCACTGTGCCTGAATAGTTCTTGGCAAGA  
AATTCAGGCTTCTTGTGCTCTCCCTTCCAGAGGTTGATCCTCACAAATTGCACACTTGATAGCATGTTCTT  
CTCAGCCA

CCAAGACCTTCTGGTAACGAGGGTGCTATCAGAGACAAGACCGCTGGTAGAAGAAACAACAGATCAAAGGA  
TGCTACTGACTCTGCCACCACCAAGAAGTCCAACACCAGAAGGGCCACTGACCGCCACTCTAGAACTGGTA  
AGACTGAC

ACATACGAGTTCGTCTACCAGCATTGCCTCCATATCGTTCACATCATT CAGTTTCTCATCAGATTCAAGCA  
CCAGCAGCTCTTCTCTGCTTCTT CAGATTCTTCATCCTCCTCATCTTTTCCATCTCTTCGACATCCGCA  
ACTTCTGA

CACAGTGGTGTATCCATAATTTGCTGCTGCAGGGCCTT CAGGCCCTGCACGCTAGCACACACCTTGGCGT  
CTGCAGTAGTGGTCTCCTTCTCAGTTTTGCTGCACCATTTGAAAGTGTGGTCCACATTCTACTGAAGAAA  
ACTACGCT

GAGATTGAGAGGTGGTGGTAAGAAGAGAAAGAAGGTTCTACACCACCCCAAAGAAGATCAAGCACAAGC  
ACAAGAAGGTCAAGTTGGCTGTCTTGTCTACTACAAGGTGATGCTGAAGGTAAGGTTACCAAATGAGA  
AGAGAATG

ATCCAGCATGCAATACAGTGACATATATATACACCACACCCACACACCACACCCACACCACACCCACACCC  
ACACACACCACACACCCACACACTCTCTTACATCTACCTTTACTCTCGCTGT CACACCTTACCCGGCTTTC  
TGACCGAA

AAACTTCCAACAACAACCACAATACACTCAAAATTATCAACAACAACCACAATACATTCAACCTCATCAAC  
AAACAACAGCAGCAGCAGCAGCAACAGCAGCAACAGGGATATACTCCTGACCAAGGTGTAAGCTTAATT  
GATCTTTG

ACGGGACACAATGAAATCGAGGCTAGTTTTCAAGATAACTTGTCTCATCTCATGGCTGAATCCAGTGAGTTC  
CATGTAGCCACCCCTTTGACCACATTCACCAGAAACACCCCTTAGAAGTGAATGCAAAGAAGCTAGCTGAA  
CATTATCG

TTAAACGAAAGATAAATTTTGAATTAAGGCGGTGTTACATCATACCTGGCATTCTGGCATAACCACCTGG  
CATAACCACGCGCCAGCAGCTGCTGGTGGTTCTGGGGCATCAACAATAGCAACTTCGGTAGTAGCTAATA  
GTGAGGCA

GGTGTCTATTTCGTGGTGTAGCAGTCTTATCCATTCTTGGCGGCGTCGTCCTCACCATCGTCGTCCTCCTGT  
TCATCGTCGTCCTCTCGTTCGTCCTCGTCATCATCATCGTCCTCATCATCATCATCGTCATCCTCTTCATC  
TTCACCAC

CTATTTTCTTCTTCTCGATTTT GATTTAGATTCACTGCTTGCCGATGAAGATGGAGGCTGGGATGATGTT  
GACTGAGGACTTGT CACAGTAATGTT CACATTGGCAAGTGGT GACTGAGAGTTGAATTCAGTTGAAACGTC  
TCTATTAA

GTTGGTAATGTGCCAGTTAGAAGCCATAGCTTTGTTTGGGGTCATCATGCCGTGCTGTTGGTACTGTCCA  
TTCTGTGGAGGTGGTACTGAAGCAGGTTGAGGAGAGACATGATGATGGTTCTCTGGAACAGCTGATGTCCC  
AGGTGTTG

TACCCTACTCAAATTCATATCTTGGATAAGATGGTCAGACGATACTTGTACAGTAGGCCCTCGCTGCTGCG  
ACTGCGACTGCGACTGTGACTGTGACTGTGACTGGGGTTGTGGTTGTGGTTGTGACTGTTGTTGTTGTTG  
TGCTGTTG

CGTCGGTGTAGCAGTCTTATCCATTCTTGGCGGCGTCGTCCTCACCATCGTCGTCCTCCTGTTTCATCGTCGT  
CCTCTCGTTCGTCCTCGTCATCATCATCGTCCTCATCATCATCATCGTCATCCTCTTCATCTTACCACCC  
TCATCATT



TGTTGGCTTTGAACGTGGACGACTTGGTCTTGTGCGAACACGCCATACTGGTCACAGTCCATCACAGAACCG  
CAGTAGGGGTTTTCCCTTGCCAGGAACCCATAAGTCAGCTGAGCCTGTGTCTAACAGCACAGTGAGGTTTTG  
TGAAGGTG

TCATCATGCTGGTGTTCATTTCGTCGGTGTAGCAGTCTTATCCATTCTTGCGGCGTTCGTCCTCACCATCGTC  
GTCCTCTGTTCATCGTCGTCCTCTCGTTCGTCCTCGTCATCATCATCGTCCTCATCATCATCATCGTCAT  
CCTCTTCA

TTGGTCTGAATTGGAACATCCTAGAAATTAGGAATTTCTGTTTGACCGTTCTCGTTCCCCTCTTCTCCATTGC  
TCACATCAGACTCAGGCTCAGACTCAGACTCAGACCCAGATCCATCGTCACCTGCCAGAAGAGCGTCCCCA  
AACAGATT

ATGCACTGCTGTGGGTACGGCCATTCTGTGGAGGTGGTACTGAAGCAGGTTGAGGAGAGGCATGATGGGG  
GTTCTCTGGAACAGCTGATGAAGCAGGTGTTGTTGTCTGTTGAGAGTTAGCCTTAGTGGAAGCCTTATCAT  
ATTCTTGA

CCAAAAGGAATCTACTCTACACTTGGTCTTGAGATTGAGAGGTGGTGGTAAGAAGAGAAAGAAGAGGTCT  
ACACCACCCCAAGAAGATCAAGCACAAGCACAAGAAGGTCAAGTTGGCTGTCTTGTCTACTACAAGGTCT  
GATGCTGA

ATAGATGGTTGTTGGTAATGTGCCAGTTAGAAGCCATAGCTTTGTTTGGGGTCATCATGCCGTGCTGTTG  
GTACTGTCCATTCTGTGGAGGTGGTACTGAAGCAGGTTGAGGAGAGACATGATGATGGTTCTCTGGAACAG  
CTGATGTC

ACAGGGATTACTACGTCATCTTCTATATGCTTAAACCTGAGAGACTTGATCTTCTTGGTTTTGTTCACTTG  
CAATGCTGGCGCCTCTGAGGCACCATTGGCTGGCAAGTCGATGGCATATAGATCTTTAATGTTGTCTGACA  
GGTTCTCA

TGTTCCCTCTGTTTCGACTTGGGGGGCAACTGGTTGTTCCACATCTGGGTCTTGTCTTTCAGCTGTGGCGTT  
GACTCAACTTCTTCTTCTGGCTTCATGGAATCTCTACATTCTTGTGGAAAGAGTCGATGATTTCCAATAT  
TTCATTAC

ACTTTTTCGGATATTTTACAGGGCGATCGCTAAGCTTAATCAACTTCTTCGACAGTTGGACCTTCAGCTTCT  
GGAGCTGGAGGAGCACCACCTGGGAAACCACCTGGAGCTGCGCCTTCTGGAGCACCACCAGCTTGGTACAA  
TTTAGACA

GGCATAAAAAGGCGAGGACTTGTGGCTTTGAACGTGGACGACTTGGTCTTGTGCGAACACGCCATACTGGT  
CACAGTCCATCACAGAACCGCAGTAGGGGTTTTCCCTTGCCAGGAACCCATAAGTCAGCTGAGCCTGTGTCT  
AACAGCAC

TACCACCGAAAGTACCGACTCCAACACTAGTGCTACTACCACTGCTAGCACCAACTCCAGCACTAATGCCA  
CTACCCTGCTAGCACCAACTCCAGCACTAATGCCACTACCCTGAAAGTACCAACGCTAGTGCCAAGGAG  
GACGCCAA

GCTGGAGTTGGTAGTCGCATTGGTACTGGCATTAGCACTACCATGAATGCACGTGTTGCTGTCCTCATCAC  
TGCTGCAATACTTTCTGCACCTGTCACTGCTATTGCTCTCCTGGAAGCTAGACGGTAACGCAACGATCGAC  
ATGGAAGC

AAACCCAAGGTAGAGCGTATACTGGAAGCGGAGTTGGTAGCAGCCCTCTGGAGTGCCCTCTTGCTTTTATG  
AGTCGACTTTGCAGTAGTGGTAGAGTTTGTCTTCTTGGTGGTGGTTGACCTCGTAGTGGTGGCAGTACTGG  
TGCCATTG

CAGTCATGTGGAAGATAGCCAAAATCACGTGAATGCCATCCAAGAAGGAATTCTCTGTTGAGCAGACCCA  
CTTTAAGAAGCAACAATGGTTCTTCTCTGCCAACCCCTTTGCTATCAATGTTTCTCCTGCATCTCAAATC  
AGGGATGG

GTGTGTGTGGTGTGTGGGTGTGGTGGGTGTGGTGTGGGTGTGGGTGTGGGTGTGGGTGTGGGTGTGGGTGTGGT  
TGTATATCTATGTCACCTTATTGCATGCTGGATGGTGTTAGACAAGGCCGTAGGGACATATAGCATCTAGG  
AAGTAACC

CTAGTGCGATTACCACTGAAAGTACCAACTCCAGCACTAATGCTACTACCACTGCCAGCACCAACGTCAGG  
ACTAGTGTACTACCACTGCCAGCATCAACGTCAGGACTAGTGCAGACTACCACTGAAAGTACCAACTCCAA  
CACTAGTG

ACTACGGTGACTTCACCACCATGTTGACTGGTATTGCCCCAGACCAAGTGACCAGAATGATCACCGGTGTT  
CCATGGTACTCCAGCAGATTAAAGCCAGCTATCTCCAAGGCTCTATCCAAAGATGGTATCTACACTATCGC  
AAACTAGG

TTTCGATGGTGGCCTGCATAAAATCAGGCCTTTGAAACGGAGCTTCCCCATCTCTTAGGATCGACTAACC  
ACGTCCAACCTGCTGTTGACGTGGAACCTTTCCCACTTCAGTCTTCAAAGTTCTCATTTGAATATTTGCTA  
CTACCACC

GTGGTGTATTGAGTGATAACGTCATCGACGGTGACGGTAGCGGTGGAAACCAAAGCTGGGGAGACAGTTTC  
AGAACAGACGTGGTCTTCAAGAAGTGATGGTGACCAAAGTGGTAGATTCTTGGCTGACAGTAGCAGTGG  
TAACGTTA

AAACTCCAGAAGTAAATGAGTCTATAGAAGATGCCAATGAACCTGCGGAGGATTCCAATGAACCTGTGGAG  
GATTCCAACAAACCTGTGAAGGATTCCAACAAACCTGTGGAGGATTCCAACAAACCTGTGGAGGATTCCA  
CAAACCTG

TACTAAATTCATTAGATGTTCTAAAATCGTAAATACGATTCATCTGTGCAGACTCTTCACTGCTAGTGTT  
GATAGGACATCTGCATCGAAGTCCTCGTCCTCTCCTGCAAAGGAGCTTTCATGCAAACCTATCCAAAGA  
TATTTCTG

CATCGTCGATGCTGAGCTATCAGTTGCTTCCGCACTCCAATGATGTGTCCCGGTGCAACTCCAGCTCGAGC  
TTCCTTCCCTCCGTGCAGCAGCCTACGGAAGGTTCCGCTTCTGCATCGGAACTTCTTTCATCTGCATCACC  
TTCAGTT

TCGTATCTGTGCCAACAAGTACATGACTACTGTCTCCGGTAGAGATGCTTTCCTTAAAGTTCAGAGTCC  
ATCCTTTCATGTCTTGAGAATCAACAAGATGTTGTCTTGTGCCGGTGCGGATAGATTGCAACAAGGTATG  
AGAGGTGC

TACTACCACCGAAAGTACCGACTCCAACACTAGTGCTACTACCACTGCTAGCACCAACTCCAGCACTAATG  
CCACTACCACTGCTAGCACCAACTCCAGCACTAATGCCACTACCACTGAAAGTACCAACGCTAGTGCCAAG  
GAGGACGC

CATTGACTGAAATCAAGAACGTTATTGTCTTAACAGAGTTGCTGCTCCAGCCAGAGCTGGTGCCGTTGCT  
CCAGAAGACATCTGGGTTAGAGCCGTCAACACTGGTATGGAACCAGGTAAGACTTCTTTCTTCCAAGCTTT  
GGGTGTCC

CCCTTTCGATGGTGGCCTGCATAAAATCAGGCCTTTGAAACGGAGCTTCCCCATCTCTTAGGATCGACTAA  
CCCACGTCCAACCTGCTGTTGACGTGGAACCTTTCCCACTTCAGTCTTCAAAGTTCTCATTTGAATATTTG  
CTACTACC

GGTGGTGGTAAGAAGAGAAAGAAGGTTCTACACCACCCCAAAGAAGATCAAGCACAAGCACAAGAAGGT  
CAAGTTGGCTGTCTTGTCTACTACAAGGTCGATGCTGAAGGTAAGGTTACCAAATGAGAAGAGAATGTA  
GCAACCCA

GCCATACTGGTACAGTCCATCACAGAACCGCAGTAGGGGTTTCCCTTGCCAGGAACCCATAAGTCAGCTG  
AGCCTGTGTCTAACAGCACAGTGAGGTTTTGTGAAGGTGTACCAATGGCTAGCTCAACAGAATAAAAGCTT  
TGCTCGTT

TGTCGAACACGCCATACTGGTCCAGTCCATCACAGAACCGCAGTAGGGGTTTCCCTTGCCAGGAACCCAT  
AAGTCAGCTGAGCCTGTGTCTAACAGCACAGTGAGGTTTTGTGAAGGTGTACCAATGGCTAGCTCAACAGA  
ATAAAAGC

TACCATCCCAAGGTTTGAATGGTTTTCAACAGTTGTAGACGGTCTGAAGTTGGAGAACTTTAACTTCAACG  
GTGCTACGGTCTGCAGGTGGAGCTTGGTAAGTGTCTCACCAGCATCATAACCTCTTTGAGGCAAACCATC  
ACCATGTG

AGCTGCTACTTACCCTACTCAAATTCATATCTTGGATAAGATGGTCAGACGATACTTGTACAGTAGGCCCT  
CGCTGCTGCGACTGCGACTGCGACTGTGACTGTGACTGTGACTGGGGTTGTGGTTGTGGTTGTGACTGTTG  
TTGTTGTT

ACATGACTACTGTCTCCGGTAGAGATGCTTTCCACTTAAGAGTCAGAGTCCATCCTTTCCATGTCTTGAGA  
ATCAACAAGATGTTGTCTTGTGCCGGTGC GGATAGATTGCAACAAGGTATGAGAGGTGCTTGGGGTAAGCC  
ACACGGTT

TAGCTGGCCGTTTTAGAGGTAAGAGAGTTGTCTACTTGAACATCTAGAAGACAACACTCTATTGGTCACT  
GGTCCATTCAAGGTCAATGGTGTTCATTGAGAAGAGTCAACGCTCGTTATGTCATTGCTACCTCTACCAA  
AGTCTCCG

TGGCCGCTCGTGTGACATTGGTCAAATTATCTTCTCTGTGACAGCAACCAAGGACAGCAACAAGGATGTTGTC  
GTTGAAGTTTTGAGAAGAGCCAGATACAAGTTCCAGGTCAACAAAAGATTATTTTGTCTAAGAAGTGGGG  
TTTCACCA

GTGACGGTAGCGGTGGAAACCAAAGCTGGGGAGACAGTTTTCAGAACAGACGTGGTCTTACACAAGAAGTGAT  
GGTGACCAAAGTGGTAGATTCTTGGCTGACAGTAGCAGTGGTAACGTTAGCAGCGGCAGAAGCGACAGCGG  
CGACAGCG

CATATCGTTACATCATTACAGTTTTCTCATCAGATTCAAGCACCAGCAGCTCTTCCCTGCTTCTTCAGATT  
CTTCATCCTCCTCATCTTTTTCCATCTCTTTCGACATCCGCAACTTCTGAATCATCGACGTCTTCTACGCAA  
ACGTCAAC

CTCGATGCATAACCTGGTTCGACCCGCTGTCTGATTGCGATACCCACAGTCATCAACTGGTCTTGTGGAA  
ATCCTGTTGCTGCTGCTGCTGCTCCTGTTGTTGTTGTTGTTGTTGAAGCTGTCTCTTTGGGACGAGGC  
TGCTTGCC

GTCTGAAGTTGGAGAACTTTAACTTCAACGGTGTACGGTCTGCAGGTGGAGCTTGGTAAGTGTCTCAC  
CAGCATCATAACCTCTTTGAGGCAAACCATCACCATGTGGTGGTTTTCAACATGAACTCATTACCATCCTTG  
TCCTTTAA

CGTTCATGATACGTGTCTTCATGACGTCTGCTGGAGAGCACACAGTGGTGGCCACCAGGCCAGCCAACAGG  
GACGCTGTCAAGTGTGTATAGTTCTTGGATGCGTGC AAATCTAATTTTTGTGACCAAGTAGTTCTTAAACAC  
GTCATACG

TTCTCTATGTGAATAATAAATAGCCTTGAATCTTTCTAGTAGTGGAGTAGGGTCAAGATTAGGATGTGTCC  
TGCCCCATGTTCTGCAGTCTGGTGGTTGAGAAGGTATGCCAGGTGGTTTTATTA ACTATGAAGTAATGCGTG  
TTTTCAA

ATTTACAGTCAAATTCAGATTATAAGGAATATGATCAAAAACCATTGCGACAGTGTTC AAGGGACTCGTG  
TCTTTGATTGCCATCACTGCACCGAACACGATGATGTGTACACATGTTCCAAACTTTCCAGACATTTGA  
CGATGGTC

TCGTCTACCAGCATTGCCTCCATATCGTTACATCATTACAGTTTTCTCATCAGATTCAAGCACCAGCAGCTC  
TTCTCTGCTTCTTCAGATTCTTCATCCTCCTCATCTTTTTCCATCTCTTTCGACATCCGCAACTTCTGAAT  
CATCGACG

ATGCGACTACCAACTCCAGCACTAATGCTACTACCACTGCCAGCACCAACGTCAGGACTAGTGCTACTACC  
ACTGCCAGCATCAACGTCAGGACTAGTGCGATTACCACTGAAAGTACCAACTCCAGCACTAATGCTACTAC  
CACTGCCA

GATAAATTTTGAATTAAGGCGGTTCGTTACATCATACTGGCATTCTGGCATAACCACCTGGCATAACCACCA  
GCGCCAGCAGCTGCTGGTGGTTCTGGGGCATCAACAATAGCAACTTCGGTAGTAGCTAATAGTGAGGCAAC  
ACCAGAAG

TCAGAGTCCGCTGAGGATGAATCAGTAAATGTATTACCTGACTCAGGTGATGGAGTGCTCAGAGGCGTTCC  
AACTGATGATGGATACTGCGGAAACTGTGATTGTGGCCAGGTGGAAAGTACATAGGCGACATTTGATAAG  
GTGTATAC

TACCTAAAATGATATCCTTCAAAGATATGTTTAAATGAATATGCAGCCACAGCTTTGAATTCAGATTGACCT  
TGTGTTGCATTAAGTCAGACACCTCTAGATTTGTGTGGCTGCTCTCAAGAAAGGATGTTGAAGAAGATTTA  
TTTACGGA

AAAGAACAGACCAAGACCTTCTGGTAACGAGGGTGCTATCAGAGACAAGACCGCTGGTAGAAGAAACAACA  
GATCAAAGGATGTCAGTACTCTGCCACCACCAAGAAGTCCAACACCAGAAGGGCCACTGACCGCCACTCT  
AGAACTGG

ACTACAACATCCAAAAGGAATCTACTCTACACTTGGTCTTGAGATTGAGAGGTGGTGGTAAGAAGAGAAAG  
AAGAAGGTCTACACCACCCCAAAGAAGATCAAGCACAAGCACAAGAAGGTCAAGTTGGCTGTCTTGTCTTA  
CTACAAGG

GGTGGCCTGCATAAAAATCAGGCCTTTGAAACGGAGCTTCCCCATCTCTTAGGATCGACTAACCACGTCCA  
ACTGCTGTTGACGTGGAACCTTTCCCACTTCAGTCTTCAAAGTTCTCATTTGAATATTTGCTACTACCAC  
CAAGATCT

ATTACACCAGAAGAGGCAAGAAGAAGCCCAATTACAACAGCAGCAAGCCCAATTGCTACAACAGCAAGCCC  
AGTTCCAGCAACAACAACCCTTGAAGCAAACAAGGACTGGGAACCAGTCTATATCGGATAAATACAGCGAC  
TTGAATAC

AACAGATGTGGTTCGTCGTTCTTTCCATGTTCAAAGAAGACCTGTTCTCTCTGTGGTTATCCAGCTGCTAA  
GACCAGATCTTACAACCTGGGGTGCCAAGGCTAAGAGAAGACACACTACTGGTACTGGTAGAATGAGATACT  
TGAAACAC

AAGCTTCATGCTTTGGATACTCATCGATACATTCAGACTCCCCACACCCAAGTGGAGATCCGCCAACTGA  
ACAATTTTGAACCTTTCTTTCATCAGTTTCTTGCAGCCGTTGAGCTCCTGTGTCTACAGGACGAGTACCAAC  
GAATTTGT

CTGACGTTGTCGTTTTGCCACCAAAGGAAATCGTCAAGAGCAACACTTCTCCTCAAGAAGGCTGACGTCCCA  
CCTCCATCCGCTGACCCATCCAAGGCTAGAAAGAACAGACCAAGACCTTCTGGTAACGAGGGTGCTATCAG  
AGACAAGA

TCTGCCTTGCAAGCTTCATGCTTTGGATACTCATCGATACATTCAGACTCCCCACACCCAAGTGGAGATC  
CGCCAACCTGAACAATTTGAACCTTCTTTCATCAGTTTCTTGCAGCCGTTGAGCTCCTGTGTCTACAGGAC  
GAGTACCA

AGTACCGACTCCAACACTAGTGCTACTACCACTGCTAGCACCAACTCCAGCACTAATGCCACTACCACTGC  
TAGCACCAACTCCAGCACTAATGCCACTACCACTGAAAGTACCAACGCTAGTGCCAAGGAGGACGCCAATA  
AAGATGGC

GACTCCAACACTAGTGCTACTACCACCGAAAGTACCGACTCCAACACTAGTGCTACTACCACTGCTAGCAC  
CAACTCCAGCACTAATGCCACTACCACTGCTAGCACCAACTCCAGCACTAATGCCACTACCACTGAAAGTA  
CCAACGCT

GGGTTGTCCCGCACCATTCAACGGCGGCTATCTGGCGATGTTGAAAGAGGGGGGAGTGGAGAGGGCTCTG  
AGGGTCAAGTGGGAGGCTGTGACAGTTCTCATAAGCTGGGCACTGAGATACATGGAAAGAAATAGGCTGTT  
CACAGTGT

CCTTAGCATTCTTCAAGACTTGAGTTTGGTATTCTTGAATTCTGGAGTGGCAGCTTGCTTCAAAGCAGTG  
GCCAAAGCAGCAATGGTATGGTTGTGTGGACCACCTTGGTGACCTGGGAAAACAGAGAAGTTAATTGGGTT  
TTCCAAGT

ATCGAATTCTTCTTGGTAGCAGTGGTGTGCTGTCTAACCAAGCAATAGTTTCTTTCAGCCTTCTTAGTGA  
CAGCGTCTTGTGAGCTTGGCTCTAGCTTGTACCAGCTTTCAGAAATGGTGTCTTCAAAGAGTAAGCAATG  
GATTCCAA

TTTCAGAGGTAAGAGAGTTGTCTACTTGAACATCTAGAAGACAACACTCTATTGGTCACTGGTCCATTCA  
AGGTCAATGGTGTTCATTGAGAAGAGTCAACGCTCGTTATGTCATTGCTACCTCTACCAAAGTCTCCGTG  
GAAGGTGT

AACGTCAGGACTAGTGCATTACCACTGAAAGTACCAACTCCAGCACTAATGCTACTACCACTGCCAGCAC  
CAACGTCAGGACTAGTGTACTACCACTGCCAGCATCAACGTCAGGACTAGTGCAGTACTACCACTGAAAGTA  
CCAACCTCC

AATTCCAGATTATAAGGAATATGATCAAAACCATTGCGACAGTGTTCGAAGGGACTCGTGCTCTTTTCGATT  
GCCATCACTGCACCGAACACGATGATGTGTACACATGTTCCAACTTTCCAGACATTTGACGATGGTCCT  
TCTGCTTC

CCAAGAAGGAATTCTCTGTTGAGCAGACCCACTTTAAGAAGCAACAATGGTTCTTCTCTGCCAACCCCTT  
TGCTATCAATGTTTCTCCTGCATCTCAAATCAGGGATGGTTTGTACTGGGATAGGTGGTCCATGATTTAC  
GTGAGCTA

CCAAAGTAACGCAAACACTTGTCTTTCTCTTTCTGTTTTGTTCCGCCAGCTGCAAAGCTGCCTTTGAAG  
TGTTCTGTGAGTCCATGCTCAGGACTTTGATTTCTGCATGCTTCACGATCTGCGCATACTCCTCGATGGTT  
TTAGATTT

AGCAGCATCAACATATCTATGTTCAAAGTCAAAGAAGATATCAACTCTTCTGCGACTGACTCAACTTCCT  
CTGGGAATTTCTGAACAGCGATGGACATGGCCTCACGCCATCTTTTCGCTGATTGGTATGCCCCATTGCT  
TCTTTGAG

ACTTTGTCCGACTACAACATCCAAAAGGAATCTACTCTACACTTGGTCTTGAGATTGAGAGGTGGTGGTAA  
GAAGAGAAAGAAGAAGGTCTACACCACCCCAAAGAAGATCAAGCACAAGCACAAGAAGGTCAAGTTGGCTG  
TCTTGTCC

TGTCTTGTCTACTACAAGGTCGATGCTGAAGGTAAGGTTACCAAATTGAGAAGAGAATGTAGCAACCCAA  
CTTGTGGTGTGGTGTCTTCTTGGCTAACCACAAGGACAGATTGTAAGTGTGTTAAGTGTATTCCGTCTAC  
AAGGTTAA

ATATTCTGTCAACAATTATCAAGCAGCAAGTTATATAAAGTTGTTTCTCACAGCTTCTTGCCTCCCTTGGC  
GTGCCCTTCTGCACCACTAGTGTAAGTGTGATGTCTTCCATTTGATGTGAGAATCGATTTCTTGTACG  
CCACGAAC

ATCAACGTCAGGACTAGTGCAGTACTACCACTGAAAGTACCAACTCCAGCACTAATGCTACTACCACTGCCAG  
CACCAACGTCAGGACTAGTGTACTACCACTGCCAGCATCAACGTCAGGACTAGTGCAGTACTACCACTGAAA  
GTACCAAC

GTGGTGGGTGGAGAATCATCCATAATGAGGACGACAACAACAGTCATGTGGAAGATAGCCAAAATCACGTG  
AATGCCATCCCAAGAAGGAATTCTCTGTTGAGCAGACCCACTTTAAGAAGCAACAATGGTTCTTCTCTGCT  
CAACCCCT

AGTTGGTAGTCGCATTGGTACTGGCATTAGCACTACCATGAATGCACGTGTTGCTGTCTCATCACTGCTG  
CAATACTTTCTGCACCTGTCACTGCTATTGCTCTCCTGGAAGCTAGACGGTAACGCAACGATCGACATGGA  
AGCTGTCTG

AGTGTTCCAAGGGACTCGTGCTCTTTTCGATTGCCATCACTGCACCGAACACGATGATGTGTACACATGTTT  
CAAACCTTTCCAGACATTTGACGATGGTCCTTCTGCTTCCACTACTAAATTATTGGACCGGTTGAAGCATA  
ATTCCACC

TTTACTATATACTTTTGGCTGTGTATTTCTATATGAGGCTAGTTGGTTGGTGGGAACTGGAAGTGAAAGTTC  
TGTTCTTTAGGGTGCAGCGGTTGCTGTTGCTGTTGCTGTTGCTGTTGCTGCTGTGGTTGGATTGATGCTTG  
TGATGTTT

GCGCCTTCTGGAGCACCACCAGCTTGGTACAATTTAGACATGATTGGGTTGGCAACCTCTTGCAATTCCTT  
CAATTGGTCATCGAATTCCTTCCCTTGGTAGCAGTGGTGTGCTGTCTAACCAAGCAATAGTTTCTTCAGCCT  
TCTTAGTG

GCATTGCCTCCATATCGTTTACATCATTTCAGTTTTCTCATCAGATTCAAGCACCAGCAGCTCTTCTCTGCT  
TCTTCAGATTCTTCATCCTCCTCATCTTTTCCATCTCTTCGACATCCGCAACTTCTGAATCATCGACGTC  
TTCTACGC

GTAAGAGAACTTGGCTGGAGTCATAGCACTAGCGGCACCACCAGCAGCCATCCAGCAATGATCTGAGG  
AAACCACATCACTACACATCTGGCTGGTGAGATGGCTCTGGCCAAACACAAAGAGAGAGAAACGGCTGGGT  
TCAAAGCC

CGTTCTCTAGGCTGATGGTAGGCAGGGCGATGCCATACTGGTGAAGTGTGGTCCGTCGGTCTGTCTCCTCC  
AAACGTTGATGTTCTCCTGGTAGCTTTCTCATCACCGTCAATATTACAAGTGAAGAATGAGAAATGCTCT  
ATATGAGG

TGAATTTGTGACCCTTGGTTGATACCTCTGGATTTCTTACCAGTGGCAGTCAAACCTCTAGCTTCACGGTGC  
TTGTGAACTGGGTACAGATCCAGTTGTAACGAGCATCTCTTCTGATAGCCTTGTGTTGAGGGTCGACCAA  
GATAACTT

AAACCACGACCTATTTTTCTTCTTCTTCGATTTTGTATTTAGATTCACTGCTTGGCGATGAAGATGGAGGCTG  
GGATGATGTTGACTGAGGACTTGTACAGTAATGTTTACATTGGCAAGTGGTACTGAGAGTTGAATTCAG  
TTGAAACG

AGGTAACGACGTGGAAGACGCTGACGTTGTGTTTTGCCACCAAAGGAAATCGTCAAGAGCAACACTTCTT  
CCAAGAAGGCTGACGTCCCACCTCCATCCGCTGACCCATCCAAGGCTAGAAAGAACAGACCAAGACCTTCT  
GGTAACGA

AGAAGAGAAAGAAGAAGGTCTACACCACCCCAAAGAAGATCAAGCACAAGCACAAGAAGGTCAAGTTGGCT  
GTCTTGTCTACTACAAGGTGATGCTGAAGGTAAGGTTACCAAATTGAGAAGAGAATGTAGCAACCCAA  
TTGTGGTG

ACCGACTCCAACACTAGTGCTACTACCACCGAAAGTACCGACTCCAACACTAGTGCTACTACCACTGCTAG  
CACCAACTCCAGCACTAATGCCACTACCACTGCTAGCACCAACTCCAGCACTAATGCCACTACCACTGAAA  
GTACCAAC

CCAAAGGAAATCGTCAAGAGCAACACTTCTTCCAAGAAGGCTGACGTCCCACCTCCATCCGCTGACCCATC  
CAAGGCTAGAAAGAACAGACCAAGACCTTCTGGTAACGAGGGTGTATCAGAGACAAGACCGCTGGTAGAA  
GAAACAAC

GATCCTGACTTCCAAGCTGCCTTACAACCTAAGTAAAGAAGAAGAGGAGTTGAAGCAATTGCAGGAACTACA  
GAGATTACAGAAGCAACAACAGTCTCTGTCTCAATTTCAAGCTCCTTTACAACAACAACAACCACAACAAC  
AACCAGCG

ATAGAGATTCCACTAAGGTTAATTCTCAACAAGAGACAACACCTGGGACATCAGCTGTTCCAGAGAACCAT  
CATCATGTCTCTCCTCAACCTGCTTCAGTACCACCTCCACAGAATGGACAGTACCAACAGCACGGCATGAT  
GACCCCAA

AAACGTCAACATCATCTTCATCCTCACTGTCGTCAACGCCGTCCTCTTCATCATCCCCATCAACAATCACT  
TCTGCACCTTCAACCTCCTCCACACCATCCACTACTGCCTATAATCAAGGAAGCACTATCACCAGTATTAT  
TAACGGTA

AGATGCTATATGTCCCTACGGCCTTGCTCTAACACCATCCAGCATGCAATACAGTGACATATATATACACCA  
CACCCACACACCACCCACACACACACACCCACACCCACACCCACACACACACACCCACACACACCACAC  
CCACACAC

GGGTGCAGCGGTTGCTGTTGCTGTTGCTGTTGCTGTTGCTGTTGCTGTTGGATTGATGCTTGTGATGTTTG  
TGGTGCCTGTGGTGTGTTGGTACAGTTTTGCTGCCAGTTTTGCTGCGAGTATGTAATTATGGGGTGAGCGG  
CATTTACA

ATACCTCTGGATTTCTTACCAGTGGCAGTCAAACCTCTAGCTTCACGGTGCTTGTGAACTGGGTACACAGAT  
CCAGTTGTAACGAGCATCTCTTCTGATAGCCTTGTTGTTGAGGGTGCACCAAGATAACTTCGAAGTACTTGT  
AAGTAGAA

TGAATCAACAAGGTTCTTCGACCCCATCTACAGCTACCGATGCAAATGCCGCCTCAACTGCTTCCACTCAC  
ACAAACACCACGACATTCAAAAGACACATTGTTGCCGTGGATGACATATCGAAAATGAACTATGAAATGAT  
AAAGAATT

GTGTCTATTGATGAAGGATCACGGCCTCTTGGCTAAGCCACCCACGACCACATCATCAGATTGGCTCCTC  
CTTTGGTCATCTCCGAAGAGGACTTGCAAACCGGTGTCGAAACCATTGCCAAGTGTATCGATCTGTTATAA  
TATTAATA

CTTTGGATACTCATCGATACATTCAGACTCCCCACACCCAAGTGGAGATCCGCCAACTGAACAATTTTGA  
ACTTTCTTTTCATCAGTTTTCTTGACAGCCGTTGAGCTCCTGTGTCTACAGGACGAGTACCAACGAATTTGTAA  
GTCAAATA

TGGAGTCATCGTGTATTAACGGACCCACGCACAGTGGTGTATCCATAATTTGCTGCTGCAGGGCCTTCA  
GGCCCTGCACGCTAGCACACACCTTGGCGTCTGCAGTAGTGGTCTCCTTCTCAGTTTTGCTGCACCATTTG  
AAAGTGT

TTCCATCTCTTCGACATCCGCAACTTCTGAATCATCGACGTCTTCTACGCAAACGTCAACATCATCTTCAT  
CCTCACTGTCTCAACGCCGTCTCTTCATCATCCCCATCAACAATCACTTCTGCACCTTCAACCTCCTCC  
ACACCATC

ATGAGATCCAAGAATCCAATGATCTTAACATAGAATCTGACCATGACTTCCAATCTGACATTGAACTACAT  
CCTGAGCAACCGAGAAATGTCCTTTCAAAGCTGTGAGTCCAACCGATTCCACACCTCCGTCAACTCATA  
TGAAGATT

GTTGCCAGGTTTGAAGAGTAACCTTGTACCATTGCTGACCCAGAAGCCAGAGAAGTTACTTTGAGAGCTT  
TGAAGACTTTGAGAAGAGTTGGTAACGTTGGTGAAGACGATGCTATTCCAGAAGTTTCTCACGCTGGTGAC  
GTTTCTAC

GGGTGCTATCAGAGACAAGACCGCTGGTAGAAGAAACAACAGATCAAAGGATGTCACTGACTCTGCCACCA  
CCAAGAAGTCCAACACCAGAAGGGCCACTGACCGCCACTCTAGAAGTGGTAAGACTGACACCAAGAAGAAG  
GTTAACCA

AGTACCAACTCCAGCACTAATGCTACTACCACTGCCAGCACCAACGTCCAGGACTAGTGCTACTACCACTGC  
CAGCATCAACGTCAGGACTAGTGCAGTACCCTGAAAGTACCAACTCCAACACTAGTGCTACTACCACTGC  
AAAGTACC

GATTAAAGTCCCGTCATCAAGTTCAAGCACTGGCACTGTGCCTGAATAGTTCTTGGCAAGAAATTCAGGCT  
TCTTGTGCTCTCCCTTCCAGAGGTTGATCCTCACAAATTGCACACTTGATAGCATGTTCTTCTCAGCCAAG  
GCAATGCG

TTATCTGTAGGTTTAATGTTTTTTGAGTCCAGGCCAATTGTTGGAGTTGGGGGAGGGGGTGGAGCTTGTGG  
AGGGTTGCTAACATGTGTTGGCAGAGACGCTGAAGGCCAAAGGGGTGCTGACACACTAGGAAGAGAAATAT  
TAGAGCTT

ACTCCAGCACTAATGCTACTACCACTGCCAGCACCAACGTCAGGACTAGTGCTACTACCACTGCCAGCATC  
AACGTCAGGACTAGTGCGACTACCACTGAAAGTACCAACTCCAACACTAGTGCTACTACCACCGAAAGTAC  
CGACTCCA

TGCTACTACCACTGCCAGCACCAACGTCAGGACTAGTGCTACTACCACTGCCAGCATCAACGTCAGGACTA  
GTGCGACTACCACTGAAAGTACCAACTCCAACACTAGTGCTACTACCACCGAAAGTACCGACTCCAACACT  
AGTGCTAC

ATATAGATGCAGCAGAAGAAGAAGAAGGAGAAGTTCTTCTTCCCCCAGCAGACCTACATCTGCCAGG  
CAGTTACATTTATCACTTGAAAGAGATGAGTTTGATCAGACACATAGAAAGAAGATTATTAAGATGTACC  
TGGTACGC

TAATCCCGCCTGGAGTCATCGTGTATTATAACGGACCCACGCACAGTGGTGCTATCCATAATTTGCTGCTGC  
AGGGCCTTTCAGGCCCTGCACGCTAGCACACACCTTGGCGTCTGCAGTAGTGGTCTCCTTCTCAGTTTTGCT  
GCACCATT

GCAAATAACGAGTGTCTTGTACTTCAAGTATACTTACGCTGTTTTATTCTATGTTCTGACAATTCTTT  
GTTCTCTGTTGACTTGGGGGGCAACTGGTTGTTCCACATCTGGGTCTTGTCTTTCAGCTGTGGCGTTG  
ACTCAACT

TGCAATTCCTTCAATTGGTCATCGAATTTCTTCTTGGTAGCAGTGGTGTGCTGTCTAACCAAGCAATAGT  
TTCTTCAGCCTTCTTAGTGACAGCGTCCTTGTGAGCTTGGTCTAGCTTGTGACCAGCTTCAGAAATGGTGT  
TCTTCAA

CGTTTTGCCACCAAAGGAAATCGTCAAGAGCAACACTTCTTCCAAGAAGGCTGACGTCCACCTCCATCCG  
CTGACCCATCCAAGGCTAGAAAGAACAGACCAAGACCTTCTGGTAACGAGGGTGTATCAGAGACAAGACC  
GCTGGTAG

CTTGGTCTTGTAAGAGTAAGAGAAAGAACCGGTGTTGAAATCAGACAACAAAGCACCGACAGACAAAATCA  
AGTCAGCAGATTCAACGGCTTCTTAACTTCTGGCTTGGACAAGGTACCGACGTAAACACCACCGTATCTT  
GGTGTG

AACTTCTTTCGACAGTTGGACCTTTCAGCTTCTGGAGCTGGAGGAGCACCACCTGGGAAACCACCTGGAGCTG  
CGCCTTCTGGAGCACCACCAGCTTGGTACAATTTAGACATGATTGGGTTGGCAACCTCTTGAATTCCTTC  
AATTGGTC

GAGTCCGCTGAGGATGAATCAGTAAATGTATTACCTGACTCAGGTGATGGAGTGCTCAGAGGCGTTCCAAC  
TGATGATGGATACTGCGGAAACTGTGATTGTGGCCAGGTGGAAAGTACATAGGCGACATTTGATAAGGTG  
TATACGGA

GGCAACCTCTTGAATTCCTTCAATTGGTCATCGAATTTCTTCTTGGTAGCAGTGGTGTGCTGTCTAACCC  
AAGCAATAGTTTCTTTCAGCCTTCTTAGTGACAGCGTCCTTGTGAGCTTGGTCTAGCTTGTGACCAGCTTCA  
GAAATGGT

TGATTGCCCCATAGAGAGCTATAAGCCGACGTGAAAGCTGCTGGTTCCAGCTTGGCTCATGTGCTCACCAG  
TCACTAGTCACTTGGTGCATTTCATTGCTACTCATCTGCGAGTGAGCATATTTGAGATCTGACTTGCCAAG  
GGATTAGA



GTAGGGTTAGGGTAGGGTTAGGGTAGTGTAGGGTGTGGGTGTGGTGTGTGTGTGGGTGTGGTGTGGT  
GTGGGTGTGGTGTGTGGGTGTGGTGTGTGGGTGTGTGTGGGTGTGGTGTGGTGTGTGGGTGTGGTGTGGT  
GTGGTGTG

TAAGAATAGGGTAGGGTTAGGGTAGGGTTAGGGTAGTGTAGGGTGTGGGTGTGGTGTGTGTGTGGGTG  
TGGTGTGGGTGTGGGTGTGGTGTGTGGGTGTGGTGTGTGGGTGTGGTGTGGTGTGGTGTGGTGTGGT  
TGGTGTGG

TAAATCAGGGTAAGAATAGGGTAGGGTTAGGGTAGGGTTAGGGTAGTGTAGGGTGTGGGTGTGGTGTGTG  
TGTGTGGGTGTGGTGTGGGTGTGGGTGTGGTGTGTGGGTGTGGTGTGTGGGTGTGGTGTGGTGTGG  
TGTGTGGG

AGAGACATGCTAAATCAGGGTAAGAATAGGGTAGGGTTAGGGTAGGGTTAGGGTAGTGTAGGGTGTGGGT  
GTGGTGTGTGTGTGGGTGTGGTGTGGGTGTGGTGTGTGGGTGTGGTGTGTGGGTGTGTGTGGG  
TGTGGTGT

GCTCCAGTTCATCCACAACAACAACAACCAATGCCTATTCACACCCTCCTGCTGCAGGTGCCCAAAC  
GAGACAGCCAGGTATGTTTGCAGATGGCCTCCACTGCTGCAGGTGTTGCCGTTGGTAGCACCATTGGAC  
ACACCCTA

ATCCACAACAACAACAACAACCAATGCCTATTCACACCCTCCTGCTGCAGGTGCCCAAACGAGACAGCCA  
GGTATGTTTGCAGATGGCCTCCACTGCTGCAGGTGTTGCCGTTGGTAGCACCATTGGACACACCCTAGG  
TGCAGGTA

AAAGAGCTATTCTTACTTATCCAAACTAATCCATTACGACGCCACCAGCGTCACGCACACACCATCAGA  
CACCACACTCATAGACGCTACTACCTGGTACAGTGTCAAGACAGAGAGGACTACAAAGGACTATAAAGAAT  
CATTGCAA

GTTGTGCAGCAGAAACAGGATAAACAGTTGCAGCATCAAACACAAGAGCAGCAGCAGATACGAGAGGACCA  
GCAGGAAGTCCCACCCCAACGTCCACGACAACAAAACAGATGGAAACCCTGGTGGAAATCCACTGCCGACG  
ATGAGCCA

TTTACCTTACATGTCTCGTTCCCCAGTAGTGAAGTGTAGGTGTCTGGCTCAGCGTGAGAAGATCTTAGA  
AGGCTTGACCGGTGCAGACTTTGTGGCTTCCAGACGAGGGAGTATGCAAGACATTTCTTACAGACGTCTA  
ACCGTCTG

TATAATGGATGTTGTGCAGCAGAAACAGGATAAACAGTTGCAGCATCAAACACAAGAGCAGCAGCAGATAC  
GAGAGGACCAGCAGGAAGTCCCACCCCAACGTCCACGACAACAAAACAGATGGAAACCCTGGTGGAAATCC  
ACTGCCGA

TCTACAATACTGGTTCCAGAAGTGGAACAGCAAGAACCTTCTCAGAGTGAAAGAACACCGTCTTTGTTTT  
GTCCGAAGGCTCTGGCTCAGAGTCGGAAGCACCTTGCTTCCAGAGATCACCACGCCAGGTCTTCATCAGC  
CTATGGGT

ATCATAAAGTTCTAAATGCGTCTCAGTAGCTACGCACAATTGCGACTGCTCACGCTTGGACCCTGCTTCCA  
GATCGACGAAGTGTCCGATGCAGGAGTGCAGAAATTCGTCTGTTTCTTTAAAGTAAGATGGTACAAGTAT  
AGCTCATC

CAAAGTCAGCTTCCACATCACAATCATCTTCTCGCTCCTTAACTTCAAGCACCAGTCCATCTTCAAGCACT  
GGCTCATCTTCAAGCACCAGTTCATCTTCAAGCAGCTCCAAAAGTAAAGGCGTCGGAAATATTGT  
TAATGTTT

AAATTAACCACAGACGGTTATAAAGAACTATCCAAGGTTGCCAACGACACAGGAAGACATGTCATTGTT  
ACAACGGGTGTGGGGCAACATCAAATGTGGGCTGCTCAACACTGGACATGGAGAAATCCACATACTTTTCA  
CACATCAG

ACAGACGGTTATAAAGAAACTATCCAAGGTTGCCAACGACACAGGAAGACATGTCATTGTTACAACGGGTG  
TGGGGCAACATCAAATGTGGGCTGCTCAACACTGGACATGGAGAAATCCACATACTTTCATCACATCAGGT  
GGTTTAGG

AATATGAGGGACCATTTGTGGGTTGACAATAGGATACGGTGTCTGTTGCTGCTGTTGATGTTGTTGCTGTT  
GCTGTTGCTGTTGCTGCTGTTGCTGTTGCTGTTGCTGTTGCTGTTGTTGTTGTTGTTGTTGCTGTTGCTGT  
TGCTGTTG

AACTCACTGAACGAACTAGACGTCACAGCCACAACGGTCGCAAAGTCAGCTTCCACATCACAATCATCTTC  
TCGCTCCTTAACCTCAAGCACCAGTCCATCTTCAAGCACTGGCTCATCTTCAAGCACCAGGTTTCATCTTCAG  
CTTCAAGC

TCCTTGACTTATCCAAACTAATCCATTACGACGCCACCAGCGTCACGCACACACCATCAGACACCACACTC  
ATAGACGCTACTACCTGGTACAGTGTCAAGACAGAGAGGACTACAAAGGACTATAAAGAATCATTGCAACG  
AACGGAGT

CTATTTTCATACGACAAAGCTAACTCACTGAACGAACTAGACGTCACAGCCACAACGGTCGCAAAGTCAGCT  
TCCACATCACAATCATCTTCTCGCTCCTTAACCTCAAGCACCAGTCCATCTTCAAGCACTGGCTCATCTTC  
AAGCACCG

AGCATTTACATGAAGACGAAGAAATAAGATACTGTCTCGAGGGTGCTGGATACTTTGACGTCAGGGATGCT  
TCCACACCAGAGAACTGGATTAGGTGTTTGGTAGAGTCAGGTGATTTACTGATTCTTCCACCAGGCATCTA  
TCATCGTT

GGGTAAGTTAAGAGACATGCTAAATCAGGGTAAGAATAGGGTAGGGTTAGGGTAGGGTTAGGGTAGTGTTA  
GGGTGTGGGTGTGGTGTGTGTGTGGGTGTGGTGTGGGTGTGGTGTGTGGGTGTGGTGTGTGGGTGTGGT  
TGTGTGTG

ATGGAGGCTCAGGTGGTGGCGGTGTCTCCTCATGGGGTGGTGTCTTCCACTTGGGGTGGCCAAGGTAATGGA  
GGTGCATCCGCTTGGGGCGGTGCTGGCGGGCGGTGCCTCAGCTTGGGGCGGCCAAGGTAAGTGGTGTACTTC  
TACTTGGG

TTCTACCAAGAGCATTTACATGAAGACGAAGAAATAAGATACTGTCTCGAGGGTGCTGGATACTTTGACGT  
CAGGGATGCTTCCACACCAGAGAACTGGATTAGGTGTTTGGTAGAGTCAGGTGATTTACTGATTCTTCCAC  
CAGGCATC

GAGCATGCAATTCGCAAGAATGATGGACCCTAATGCCGGTATGGGCTCTGCAGGTGGGGCTGCCTCTGCCT  
TCCCCGCTCCTGGTGGCGATGCTCCAGAGGAAGGCTCCAACACGAACACTACTTCTCATCCAACACAGGG  
AACAACGC

ATCGAGACCTACTCAGACAAGGTCCGCTTCTACCATGGCGGCTCCAGTTCATCCACAACAACAACAACAAC  
CAAATGCCTATTACACCCTCCTGCTGCAGGTGCCCAAACGAGACAGCCAGGTATGTTTGCAGATGGCC  
TCCACTGC

GATGAGGTTAGAAGAACAAGATTTGGTGTCTGTAGTTATCAATGTCATCATCTTCTTCTTCTGCTTCTTTCAT  
CTCTATCCTGGTGTCAAGACCATCCGTGTCACTGTGGTCAGTTTCATCGCCATGGTCCTTATCTGAATGA  
TCTACTTC

GGAGGTACCATCTACAATACTGGTTCCAGAAGTGGAACAGCAAGAACCCTTCTCAGAGTGAAAGAACACCGT  
CTTTGTTTTCTGTCGGAAGGCTCTGGCTCAGAGTCGGAAGCACCTTGCTTCCAGAGATCACCACGCCAGGT  
CCTCATCA

GGGCGACAAGTTTAGGCATTGAAGAGGGGAACGTTGGAAAGCTGTTGGTGGAGTTTGTTCATGGAATCTGTG  
TTGGAGAAGTTCTGCTCTGATGAGCAGAACATATTGTTGACCGACACCGTTGTGTCTATAGGTGACGATAA  
CTCAGAGG

TGACGTCTGCAAATGTAAGCTTTCTTGGGGGCAATATGGAGGTATGTTTCAATGGTGGTGCCGCTGGAGCC  
TGAGTTTGAGCTGAAGCTTCAACTGGGGCTGAAGTTTGGACTGGGGCTGAATTTTGGACTGGGGCTGAAGC  
TTGAACTG

TACCCAGTTGAGATTGCTGAAGCTGTTTTCAACTATGGTGACTTCACCACCATGTTGACTGGTATTCCAGC  
TGAACAAGTCACCAGAGTCATCACTGGTGTCCCATGGTACTCCACTAGATTGAGACCAGCTATTTCCAGTG  
CTCTATCT

CTATGAACATTAATTCTTTCCCAAAGGAACTGAAGTAAGTGGGGTCTGCCATGGTGAGTCATTGGTCACT  
TGAGTTGATTTGGTTGAAGAAACAATTGTTGTACCTCTTCATCTTCTGTGGAAACCACTACTTTATCTTT  
TGCTTTCA

CATCTGCAGTATCATAAAGTTCTAAATGCGTCTCAGTAGCTACGCACAATTGCGACTGCTCACGCTTGGAC  
CCTGCTTCCAGATCGACGAAGTGTCCGATGCAGGAGTGCACGAAATTCGTCTGTTTCTTTAAAGTAAGATG  
GTACAAGT

GGATGGACTCTCTTGAAGCTAGATTACAATTCATTCAGGTCTGAAGAACCTGCAAAAGACGCTGCACAAG  
ACCAGAGACTCTATCACATCATCGTTCGACCACCACACCACCGTCATCGCAACAAAAGCTGAACAATGACCC  
TATACAGT

GGTTGACAATAGGATACGGTGTCTGTTGCTGCTGTTGATGTTGTTGCTGTTGCTGTTGCTGTTGCTGCTGT  
TGCTGTTGCTGTTGCTGTTGCTGTTGTTGTTGTTGTTGTTGCTGTTGCTGTTGCTGTTGCGGTTGATGCTG  
GGGTTGAT

ATCGTGGCTCCTTTAATGTTTGATTATCTGGTACAGTATTCCTACTGTCTGCTTCCTTAGACCATTTGGAA  
TGTGATGCCGATTAGATTCCACTCTTGAAGGGTGATTCTGTATGGATACTTCCCACATTTGATTGAGA  
TGATTGAT

AGGTGGTGGCGGTGTCTCCTCATGGGGTGGTGTCTTCCACTTGGGGTGGCCAAGGTAATGGAGGTGCATCCG  
CTTGGGGCGGTGCTGGCGGGCGGTGCCTCAGCTTGGGGCGGCCAAGGTAAGTACTGGTGCTACTTCTACTTGGGGT  
GGTGCTTC

AGGATACGGTGTCTGTTGCTGCTGTTGATGTTGTTGCTGTTGCTGTTGCTGTTGCTGTTGCTGTTGCTGTTGCT  
GTTGCTGTTGCTGTTGTTGTTGTTGTTGTTGTTGCTGTTGCTGTTGCTGTTGCGGTTGATGCTGGGGTTGATGC  
TGAGGCTG

AGCGGCCACAATTTAACTACTTTTCACTGCTCCTTCAACATCCAGTGCACAACCTTGTAAAGCAAATCAACTA  
CCTCTAGCTCCATCCTGGTACACCCAGAATCGACAGGTCTGGAAATTCCTCAACTGCCTCTAGAATTGCA  
ACATCACT

ACTCAGACAAGGTCCGCTTCTACCATGGCGGCTCCAGTTCATCCACAACAACAACAACCAAAATGCCTA  
TTCACACCCTCCTGCTGCAGGTGCCAAACGAGACAGCCAGGTATGTTTGGCAGATGGCCTCCACTGCTG  
CAGGTGTT

TGTTATTTTCATTTTCTGCTAAATTTCTTTGGTTCCATTGAACTCGCTCTTCTGGTGTCTCTTTGGCCAACA  
TGTCTTGCTCATGTTTTCAGTGACAGTGTGTCTTTTGAAGGAAGGTAAGTACTCGATGTTCCAATTATCTCCCC  
TCCTCTTT

AGAAACAGGATAAACAGTTGCAGCATCAAACACAAGAGCAGCAGCAGATACGAGAGGACCAGCAGGAAGTC  
CCACCCCAACGTCCACGACAACAAAACAGATGGAAACCCTGGTGGAAATTCCTACTGCCGACGATGAGCCAAA  
CACGGGAA

ATAATTGTGTAATAGTCGATTGTCTGCGGTATGAAATAGCCACCGGTGGAAGGGTCATTCTCTAGCC  
ACGCAAGCACACCGGTATTCTCACCATCCCAGGTGCATCAGCAATTACCTCACCCAAGAAATCAGGAACA  
TCAGCTGG

GAAATAAGATACTGTCTCGAGGGTGGCTGGATACTTTGACGTCAGGGATGCTTCCACACCAGAGAACTGGAT  
TAGGTGTTTTGGTAGAGTCAGGTGATTTACTGATTCTTCCACCAGGCATCTATCATCGTTTCACCTTGACAA  
CTAGCAAC

AGATGATAACCATTTTCAGCTACTATTTTCATACGACAAAAGCTAACTCACTGAACGAACTAGACGTCACAGCCA  
CAACGGTCGCAAAGTCAGCTTCCACATCACAATCATCTTCTCGCTCCTTAACTTCAAGCACCAGTCCATCT  
TCAAGCAC

TTTAGTTCCCATCTGCAGTATCATAAAGTTCTAAATGCGTCTCAGTAGCTACGCACAATTGCGACTGCTC  
ACGCTTGGACCCTGCTTCCAGATCGACGAAGTGTCCGATGCAGGAGTGCACGAAATTCGTCTGTTTCTTTA  
AAGTAAGA

TGCCTCAAAGGAGGTACCATCTACAATACTGGTTCCAGAAGTGGAAACAGCAAGAACCTTCTCAGAGTGAA  
AGAACCCTGCTTTGTTTTCGTCCGAAGGCTCTGGCTCAGAGTCGGAAGCACCTTGCTTCCAGAGATCAC  
CACGCCAG

CCAAGTGGAGAAGGTTGTTGTTTTCTTACAAATTGCTAGATGCTCCAGCTGCCATCAGAACTGGTCAATTCG  
GCTGGTCTGCTAACATGGAAAGAATCATGAAGGCTCAAGCCTTGAGAGACTCTTCCATGTCTCTTACATG  
TCTTCCAA

GAAGAACAAGATTTGGTGTCTAGTTATCAATGTCATCATCTTCTTCTTCTGCTTCTTTCATCTCTATCCTG  
GTCGTCAAGACCATCCGTGTCACTGTGGTCAGTTTCATCGCCATGGTCCTTATCTGAATGATCTACTTCAT  
GATATAAC

TAGCCACCGGTGGAAGGGTCATTCTCTAGCCACGCAAGCACACCGGTATTCTCACCATCCCCAGGTGCATC  
AGCAATTACCTCACCCAAGAAATCAGGAACATCAGCTGGGGGAAATTCATTGGGTGCTGTTGGATAGTAGA  
GTTTATAT

CGCTGGCGCAAATAACGCCACCGCCACCGGTGCAGCAGCTGGCACTGGCGCCACCCCGAACATGTCGTCAG  
GTCAAAGTGCAGGCTTCAATCCGCTGGCCGACTTGACCAGTGCCAGATACGCTGGATATTTGAATATGCCA  
TCTGCAGA

GATAAGTGTAGTAGGTATATCCTGTGTAAGACTACCTCGTACGCCAAGATCATCTGTGGCAACGACCGCTT  
CAACAGAGAGCTCTGAGCAAGGTCCCAAATGAAGAGAATGGCAAGACGTAAGAGTGCAAAGTCTTTGGTA  
AACTACAC

CGACAAAGCTAACTCACTGAACGAACTAGACGTCACAGCCACAACGGTCGCAAAGTCAGCTTCCACATCAC  
AATCATCTTCTCGCTCCTTAACTTCAAGCACCAGTCCATCTTCAAGCACTGGCTCATCTTCAAGCACCAGT  
TCATCTTC

CGGTATGAAATAGCCACCGGTGGAAGGGTCATTCTCTAGCCACGCAAGCACACCGGTATTCTCACCATCCC  
CAGGTGCATCAGCAATTACCTCACCCAAGAAATCAGGAACATCAGCTGGGGGAAATTCATTGGGTGCTGTT  
GGATAGTA

TCCTTCAACATCCAGTGCACAACCTGTAAGCAAATCAACTACCTCTAGCTCCATCCTGGTCCACACCCAGAA  
TCGACAGGTCTGGAAATTCCTCAACTGCCTCTAGAATTGCAACATCACTCCCTAACAAAACACTACATTTGTT  
TCTTCCCT

GCAAGGAATACCACATCCGCAACAATCGCAGCCACAGCAACAGCAACAACAACAACAACAACACTGCAACAGC  
AGCAACAGCAGCAACAACAACAACCCCTCACCGGCATTCATCAGCCTCACCAACAGGCTTTTGCCAACGCT  
GCCTCCCC

ACCTCTGGCAAAGAAATCTAAGGCTTCTCTGGTATCAGCTCTGTTCCCCACGTAAGAGCCGACAATGGAGA  
TAGACTTGACAACGTGGTTGAAGACATCAGAGGAGCACTTTCACCGGCTGGCAAACCAACCAAGACAACA  
GTACCGTT

ATGAAGAAATTTGCCGTATGAATTATTCTGTATGTACACCAAATGTGTCATGATCTTCTTGTTCCTTCAA  
TGTGGCGCTGGCATTGAGAGTGATGATGCTTGGTGTGAGCACTTGAAATGTCTCCTCTTTAAGAAAGACA  
ATCCTATC

TCTTGAAGCTAGATTACAATTCATTCAGGTCCTGAAGAACCTGCAAAAAGACGCTGCACAAGACCAGAGACT  
CTATCACATCATCGTCGACCACCACACCACCGTCATCGCAACAAAAGCTGAACAATGACCCTATACAGTTCT  
TACTTGAG

GCTGTTGATGTTGTTGCTGTTGCTGTTGCTGTTGCTGTTGCTGTTGCTGTTGCTGTTGCTGTTGTTGT  
TGTTGTTGTTGCTGTTGCTGTTGCTGTTGCTGTTGCTGTTGCTGTTGCTGTTGCTGTTGCTGTTGCTG  
TTGAGATG

AACAATCGCAGCCACAGCAACAGCAACAACAACAACAACAACACTGCAACAGCAGCAACAGCAGCAACAACAA  
CAACCCCTCACCAGCATTTCATCAGCCTCACCAACAGGCTTTTGCCAACGCTGCCTCCCCCTATCTGAATGC  
TGAACAGA

CAGTAAGTAGCCATCGAGTAGACGGCAGAGTTGATACCACCAGCTGGAGCACCGACATTAACAATGGCAAT  
CTTCAGTCTCTTGTCTTTGGTAGCTTTGGTTGCTTGTGGTCAGCAGAGTTGATAGCCATGAAATTGTTTA  
AATGTTCA

ATCAAAGAATACGAACCATTGACCAAGGCCTTGAAGGATATCTTGGGTGACCAAGTGAGAGAAGGTTGTTGT  
TTCTTACAAATTGCTAGATGCTCCAGCTGCCATCAGAAGTGGTCAATTCGGCTGGTCTGCTAACATGGAAA  
GAATCATG

ACCATTTGTGGGTTGACAATAGGATACGGTGTCTGTTGCTGCTGTTGATGTTGTTGCTGTTGCTGTTGCTG  
TTGCTGCTGTTGCTGTTGCTGTTGCTGTTGCTGTTGTTGTTGTTGTTGTTGCTGTTGCTGTTGCTGTTGCTG  
GTTGATGC

TCCAGTGCACAACCTTGTAAAGCAAATCAACTACCTCTAGCTCCATCCTGGTCACACCCAGAATCGACAGGTC  
TGGAATTTCTCAACTGCCTCTAGAATTGCAACATCACTCCCTAACAAAACACTACATTTGTTTCTTCCCTAA  
GTTCAACA

GTTGCTGCTGTTGCTGTTGCTGTTGCTGTTGCTGTTGTTGTTGTTGTTGTTGCTGTTGCTGTTGCTGTTGC  
GGTTGATGCTGGGGTTGATGCTGAGGCTGCTGGATCTGCTGTTGAGATGATTGCTGGGGCTGTGCTGGTGA  
TTGCAAAAT

TGATAAACTTGCTCTCGGTACGCTAGACAAAGAATTTCTCAATGAGGTCCTGGCCATAGCCTCTTCATCTA  
CCATTCTTTCCAGAGACTTTCTTTGCTGGAGAACCAGCTCTGCTTCTGCGTCTTTACGTTCTTTGGTACTG  
GTGCATAT

GGTGTCTCCTCATGGGGTGGTGTCTTCCACTTGGGGTGGCCAAGGTAATGGAGGTGCATCCGCTTGGGGCGG  
TGCTGGCGGGCGGTGCCTCAGCTTGGGGCGGCCAAGGTAAGGTAATGGAGGTGCATCCGCTTGGGGCGG  
CCTGGGGT

AGATTACAATTCATTCAGGTCCTGAAGAACCTGCAAAAAGACGCTGCACAAGACCAGAGACTCTATCACATC  
ATCGTCGACCACCACACCACCGTCATCGCAACAAAAGCTGAACAATGACCCTATACAGTTCTACTTGAGAA  
ACTACAGA

ATAGTGAATTTACCTTTTCGCACACAGAAGAGGACAAGTTAAATGAGTTCCAGGTCATCACGAATTTCCCC  
CCAGAAGACTTGCCAGATGTGGTGAGACTGTTGAGGAACCATGGTTGGCAGTTAGAACCAGCATTGAGCCG  
ATATTTTCG

ATTCAACAGCAGCAACATCACACGCAGAATTCACAACCACAACAGCAACAGCAACAACAACCACAGCAGCA  
AATGTCACAGCAACAAATGTCACAGCATCCTCGACCACAGCAAGGAATACCACATCCGCAACAATCGCAGC  
CACAGCAA

TGGGGTGGCCAAGGTAATGGAGGTGCATCCGCTTGGGGCGGTGCTGGCGGCGGTGCCTCAGCTTGGGGCGG  
CCAAGGTACTGGTGTACTTCTACTTGGGGTGGTGTCTCAGCCTGGGGTAACAAATCAAGTTGGGGCGGTG  
CATCCACT

TGTTGCTGTTGCTGTTGTTGTTGTTGTTGTTGTTGCTGTTGCTGTTGCTGTTGCTGTTGCGGTTGATGCTGGGGTTGATG  
CTGAGGCTGCTGGATCTGCTGTTGAGATGATTGCTGGGGCTGTGCTGGTGATTGCAAATCATTGAAGTGT  
TATGTAGA

AAGGTTGTTGTTTCTTACAAATTGCTAGATGCTCCAGCTGCCATCAGAAGTGGTCAATTCGGCTGGTCTGC  
TAACATGGAAAGAATCATGAAGGCTCAAGCCTTGAGAGACTCTTCATGTCCTCCTACATGTCTTCCAAGA  
AGACTTTC

TGGAAGGGTCATTCTCTAGCCACGCAAGCACACCGGTATTCTCACCATCCCAGGTGCATCAGCAATTACC  
TCACCCAAGAAATCAGGAACATCAGCTGGGGGAAATTCATTGGGTGCTGTTGGATAGTAGAGTTTATATCC  
TAACTTTT

TGCTGTTGCTGTTGCTGCTGTTGCTGTTGCTGTTGCTGTTGCTGTTGTTGTTGTTGTTGTTGCTGTTGCTG  
TTGCTGTTGCGGTTGATGCTGGGGTTGATGCTGAGGCTGCTGGATCTGCTGTTGAGATGATTGCTGGGGCT  
GTGCTGGT

AAACTCAATGATTCAACAGCAGCAACATCACACGCAGAATTCACAACCACAACAGCAACAGCAACAACAAC  
CACAGCAGCAAATGTCACAGCAACAAATGTCACAGCATCCTCGACCACAGCAAGGAATACCACATCCGCAA  
CAATCGCA

GCTGTTGTTGTTGTTGTTGTTGTTGCTGTTGCTGTTGCTGTTGCTGTTGCGGTTGATGCTGGGGTTGATGCTGAGGCTGC  
TGGATCTGCTGTTGAGATGATTGCTGGGGCTGTGCTGGTGATTGCAAATCATTGAAGTGTATGTAGATT  
TATAGTTG

TACCATGGCGGCTCCAGTTCATCCACAACAACAACAACCAAATGCCTATTCACACCCTCCTGCTGCAG  
GTGCCCAAACGAGACAGCCAGGTATGTTTGCAGATGGCCTCCACTGCTGCAGGTGTTGCCGTTGGTAGC  
ACCATTGG

TATACAGCAAGGATGGACTCTCTTGAAGCTAGATTACAATTCATTAGGTCTGAAGAACCTGCAAAAAGAC  
GCTGCACAAGACCAGAGACTCTATCACATCATCGTCGACCACCACACCACCGTCATCGCAACAAAAGCTGA  
ACAATGAC

ACAACGGTGCCAAAGTCAGCTTCCACATCACAATCATCTTCTCGCTCCTTAACTTCAAGCACCAGTCCATC  
TTCAAGCACTGGCTCATCTTCAAGCACCAGTTCATCTTCAAGCAGCTCCAAAAGTAAAGGCGTGC  
GAAATATT

AATAACGCCACCGCCACCGGTGCAGCAGCTGGCACTGGCGCCACCCCGAACATGTCGTCAGGTCAAAGTGC  
AGGCTTCAATCCGCTGGCCGACTTGACCAGTGCCAGATACGCTGGATATTTGAATATGCCATCTGCAGACA  
TGTTTGGC

CGGGATAAATTGCCTCAAAAAGGAGGTACCATCTACAATACTGGTTCCAGAAGTGGAACAGCAAGAACCTTC  
TCAGAGTGAAAGAACCAGTCTTTGTTTTTCGTCCGAAGGCTCTGGCTCAGAGTCGGAAGCACCTTGCTTC  
CAGAGATC

TCACCTTTCGCACACAGAAGAGGACAAGTTAAATGAGTTCAGGTTCATCACGAATTTCCCCCAGAAGACT  
TGCCAGATGTGGTGAGACTGTTGAGGAACCATGGTTGGCAGTTAGAACCAGCATTGAGCCGATATTTGAT  
GGAGAGTG

CAAGAACCTTCTCAGAGTGAAAGAACCAGTCTTTGTTTTTCGTCCGAAGGCTCTGGCTCAGAGTCGGAAGC  
ACCCTTGCTTCCAGAGATCACCACGCCAGGTCTCATCAGCCTATGGGTAATACCAGCAATAATGTGGTGC  
AAATGATA



TAGTAGAGCTTCCAAACAATCCTGTAGAGTTGGTCGCTCCAGAGCCAAAGCCACCACCATTCCAGTTCCG  
GTTCCAAACATGCCTGTTGCTGGCTTTTGACCAAATAATCCTCCTGTTGTAGCAGAAGTAGTGGAGTTATT  
ATTACCCA

TTCGCAAGAATGATGGACCCTAATGCCGGTATGGGCTCTGCAGGTGGGGCTGCCTCTGCCTTCCCCGCTCC  
TGGTGGCGATGCTCCAGAGGAAGGCTCCAACACGAACACTACTTCTCATCCAACACAGGGAACAACGCAG  
GGACTAAT

AGAGTTGTCTGAAGTTTGTGGCTGACTTGCAAGGTTCTGAAGACCATTCTTTTCAGAAAGGTCAAGTTGAG  
AGTCGATGAAGTTCAAGGTAAGAAGCTTGTGGACCAACTTCCACGGTATGGACTTCACTACCGACAAATTGA  
GATCAATG

GCCAGTAGTCAATCATGAGGATAGTGAATTTTACCTTTTCGCACACAGAAGAGGACAAGTTAAATGAGTTCC  
AGGTCATCACGAATTTCCCCCAGAAGACTTGCCAGATGTGGTGAGACTGTTGAGGAACCATGGTTGGCAG  
TTAGAACC

AGTGGAACAGCAAGAACCTTCTCAGAGTGAAAGAACACCGTCTTTGTTTTTCGTCCGAAGGCTCTGGCTCAG  
AGTCGGAAGCACCTTGGCTTCCAGAGATCACCACGCCAGGTCCTCATCAGCCTATGGGTAATACCAGCAAT  
AATGTGGT

TGCTTCCACTTGGGGTGGCCAAGGTAATGGAGGTGCATCCGCTTGGGGCGGTGCTGGCGGGTGCCTCAG  
CTTGGGGCGCCAAGGTAAGTACTGGTGCTACTTCTACTTGGGGTGGTGCTTTCAGCCTGGGGTAACAAATCAAGT  
TGGGGCGG

TTTTGAATCTTTCAGTATGAGTTGACGGAGGTGTGGAATCGGTTGGACTCACAGCTTTTGAAAGGACATTTTC  
TCAGTTGCTCAGGATGTAGTTCAATGTGAGATTGGAAGTCATGGTCAGATTCTATGTTAAGATCATTGGAT  
TGTTGGAT

TTATCGACACTGAAATAAACAGAATCAGAAAACCTGGTCGGTCCAACCTGCTGAAGTCATTGGTGCTGTTTTCC  
GGTGGTGTGATTCTACTGTTGCATCCAAATTGATGACAGAAGCCATCGGTGATAGATTCCATGCCATCTT  
GGTCGATA

TCATCAAGACCTATATCGAGATCGAGACCTACTCAGACAAGGTCCGCTTCTACCATGGCGGCTCCAGTTCA  
TCCACAACAACAACAACAACCAAAATGCCTATTACACCCTCCTGCTGCAGGTGCCCAAACGAGACAGCCAG  
GTATGTTT

GGTCCGCTTCTACCATGGCGGCTCCAGTTCATCCACAACAACAACAACCAAAATGCCTATTACACCCT  
CCTGCTGCAGGTGCCCAAACGAGACAGCCAGGTATGTTTGCAGATGGCCTCCACTGCTGCAGGTGTTGC  
CGTTGGTA

GCTCTCGGTACGCTAGACAAAGAATTTCTCAATGAGGTCTGGCCATAGCCTCTTTCATCTACCATTCTTTTC  
CAGAGACTTTCTTTGCTGGAGAACCAGCTCTGCTTCTGCGTCTTTACGTTCTTTGGTACTGGTGCATATGT  
CTGCCATT

AAACAAAGACACCGACACAGAACAAGAAACATGCAAATAGCTGGTTCATGTTCTTCAAAGCAACACCCATG  
TGGTACACAACCTACAGGCAACCAAGCAACTGGAACAACCCACCAAGCTGTTTTAGTTAATGGTTCCAAGAA  
ATTACCAA

AAAACGCTATTATAATGGATGTTGTGCAGCAGAAACAGGATAAACAGTTGCAGCATCAAACACAAGAGCAG  
CAGCAGATACGAGAGGACCAGCAGGAAGTCCCACCCCAACGTCCACGACAACAAAACAGATGGAAACCCTG  
GTGGAATT

AACACCATCCAGCATGCAATACAGTGACATATATATACACCCACACCCACACACCACACCCACACCCACAC  
ACCACACCCACACACCCTAACACAATCCTAACAGTACCCTATTCTAACCTGATGAACCTGTCTCCAACCC  
TACCCTCC



TTTCTTGGGGCAATATGGAGGTATGTTTCAATGGTGGTGCCGCTGGAGCCTGAGTTTGAGCTGAAGCTTCA  
AACTGGGGCTGAAGTTTGGACTGGGGCTGAATTTTGGACTGGGGCTGAAGCTTGAAGCTGGGACTGAAGTTT  
GGACTTGT

TTCCACATCACAATCATCTTCTCGCTCCTTAACTTCAAGCACCAGTCCATCTTCAAGCACTGGCTCATCTT  
CAAGCACCAGTTCATCTTCAAGCAGCTCCAAAAGTAAAGGCGTCGGAAATATTGTTAATGTTTCC  
TTTAGTCA

ACAAATAGCACCTATGAACAAGGTGAAAAAGGAAGAAGTAGTGGAGAGGATTGTCTGCGATGCCACCGATG  
TGAATGCCAGCGAGGCATTGGTCACAAGGTTAGCTGTGAACCAAAGTATGCAGAACTCAGCACTTAACTTG  
ATTGTTTC

AAGGAACAGCTATCTTTCGTTATGAATTTGTACTACGAGAAGAGTGGTGGTAGCAAATCTGACTGTAGCTT  
CAGCGTTCTGCCACTCTACAACTGCCACCACGCAAGCTAGTTGCTCCTCCGCTTTGAAAGAGATTGGTA  
GTATGGGT

ATTTGGTGTGCTAGTTATCAATGTCATCATCTTCTTCTTTCGCTTCTTTCATCTCTATCCTGGTCGTAAGA  
CCATCCGTGTCACTGTGGTCAGTTTCATCGCCATGGTCCTTATCTGAATGATCTACTTCATGATATAACTG  
CAGGGTGC

CAAAATAGGATTTACCTTACATGTCTCGTTCCCCAGTAGTGAAGTGTTTAGGTGTCTGGCTCAGCGTGAGA  
AGATCTTAGAAGGCTTGACCGGTGCAGACTTTGTGGCTTCCAGACGAGGGAGTATGCAAGACATTTCTTA  
CAGACGTC

AAACTGGACTATGGAAAACCTTATCGACACTGAAATAAACAGAATCAGAAAACCTGGTCGGTCCAACCTGCTG  
AAGTCATTGGTGTGTTTCCGGTGGTGTGATTCTACTGTTGCATCCAAATTGATGACAGAAGCCATCGGT  
GATAGATT

ATCCAAACTAATCCATTACGACGCCACCAGCGTCACGCACACACCATCAGACACCACACTCATAGACGCTA  
CTACCTGGTACAGTGTCAAGACAGAGAGGACTACAAAGGACTATAAAGAATCATTGCAACGAACGGAGTCT  
CTGCTTAA

ATTCTCTAGCCACGCAAGCACACCGGTATTCTCACCATCCCCAGGTGCATCAGCAATTACCTCACCCAAGA  
AATCAGGAACATCAGCTGGGGGAAATTCATTGGGTGCTGTTGGATAGTAGAGTTTATATCCTAACTTTTCC  
ATTTCCGGC

CACACAGAAGAGGACAAGTTAAATGAGTTCAGGTGCATCAGCAATTTCCCCCAGAAGACTTGCCAGATGT  
GGTGTAGACTGTTGAGGAACCATGGTTGGCAGTTAGAACCAGCATTGAGCCGATATTTGATGGAGAGTGGA  
AAGCGAA

GTAGGTATATCCTGTGTAAGACTACCTCGTACGCCAAGATCATCTGTGGCAACGACCGCTTCAACAGAGAG  
CTCTGAGCAAGGTCCCAAATGAAGAGAATGGCAAGACGTAAGAGTGCAAAGTCTTTGGTAAACTACTG  
CCACCATT

ATATGGCACGTTCAAGAGGATCATCAAGACCTATATCGAGATCGAGACCTACTCAGACAAGGTCCGCTTCT  
ACCATGGCGGCTCCAGTTCATCCACAACAACAACAACCAAATGCCTATTACACCCTCCTGCTGCAGG  
TGCCCAA

CTTTCAGTGCTCCTTCAACATCCAGTGCACAACCTTGTAAAGCAAATCAACTACCTCTAGCTCCATCCTGGTC  
ACACCCAGAATCGACAGGTCTGGAAATTCCTCAACTGCCTCTAGAATTGCAACATCACTCCCTAACAAAAC  
TACATTTG

AGCCACCTGTAAAGAGCTATTCTTACTTATCCAAACTAATCCATTACGACGCCACCAGCGTCACGCACA  
CACCATCAGACACCACACTCATAGACGCTACTACCTGGTACAGTGTCAAGACAGAGAGGACTACAAAGGAC  
TATAAAGA





GGGTGTGGGTGTGGTGTGTGGGTGTGGTGTGTGGGTGTGGTGTGGGTGTGGTGTGTGGGTGTGTGTGGGTG  
TGGTGTGGGTGTGGTGTGGTGTGTGGGTGTGGTGTGGTGTGGTGTGTGTGGGTGTGGTGTGGGTGTGTG  
GGTGTGGG

TGTGGGTGTGGTGTGTGGGTGTGTGTGGGTGTGGTGTGGGTGTGGTGTGGGTGTGGGTGTGGGTGTGGGT  
GTGGTGTGTGTGGGTGTGGTGTGGGTGTGTGGGTGTGGGTGTGGTGTGTGGTGTGTGTGTGGGTGTGGGT  
TGGGTGTG

TGTGTGGGTGTGGGTGTGGGTGTGGTGTGTGTGGGTGTGGTGTGGGTGTGTGGGTGTGGGTGTGGTGTGTG  
GTGTGTGTGTGGGTGTGGGTGTGGGTGTGGTGTGTGGGTGTGGGTGTGGTGTGTGGGTGTGGTGTGTGGGT  
GTGTGTGG

GTGTGTGTGGGTGTGTGGGTGTGGGTGTGTGGGTGTGGGTGTGGTGTGTGGGTGTGGTGTGTGGGTGTGGT  
GTGGGTGTGGTGTGTGGGTGTGTGTGGGTGTGGTGTGGTGTGGTGTGGTGTGTGGGTGTGGGTGTGGGTG  
TGGTGTGT

GTGGTGTGTGGGTGTGGTGTGTGGGTGTGGTGTGGGTGTGGTGTGTGGGTGTGTGTGGGTGTGGTGTGGGT  
GTGGTGTGGTGTGTGGGTGTGGGTGTGGTGTGGTGTGGTGTGGTGTGGTGTGGTGTGGTGTGGTGTGGGT  
TGGTGTGT

GGTGTGGTGTGTGGGTGTGGTGTGGGTGTGGTGTGGGTGTGTGTGGGTGTGGTGTGGGTGTGGTGTGGT  
GTGTGGGTGTGGGTGTGGGTGTGGTGTGTGTGGGTGTGGTGTGGGTGTGTGGGTGTGGGTGTGGTGTGG  
TGTGTGTG

GTGTGTGGGTGTGTGTGGGTGTGGTGTGGGTGTGGTGTGGTGTGTGGGTGTGGGTGTGGGTGTGGTGTGTG  
TGGGTGTGGTGTGGGTGTGTGGGTGTGGGTGTGGTGTGGTGTGTGGTGTGTGGTGTGGGTGTGGGTGTGGT  
GTGTGGGT

GTGTGTGGGTGTGGTGTGGGTGTGGTGTGGTGTGGTGTGGTGTGGGTGTGGGTGTGGGTGTGGTGTGGT  
GTGGGTGTGTGGGTGTGGGTGTGGTGTGGTGTGGTGTGGTGTGGTGTGGTGTGGTGTGGTGTGGTGTGGT  
GGGTGTGG

TGTGGTGTGGTGTGTGGGTGTGGGTGTGGGTGTGGTGTGGTGTGGTGTGGTGTGGTGTGGTGTGGTGTGGT  
GTGGTGTGTGGTGTGTGGGTGTGGGTGTGGGTGTGGTGTGGTGTGGTGTGGTGTGGTGTGGTGTGGTGTGG  
GTGTGTGG

GTGTGTGGGTGTGGGTGTGTGGGTGTGGGTGTGGTGTGGTGTGGTGTGGTGTGGTGTGGTGTGGTGTGGT  
TGTGTGGGTGTGTGTGGGTGTGGTGTGGGTGTGGTGTGGTGTGGTGTGGTGTGGTGTGGTGTGGTGTGGT  
GGGTGTGG

TGTGGGTGTGGTGTGTGTGGGTGTGGGTGTGGGTGTGGTGTGGTGTGGTGTGGTGTGGTGTGGTGTGGT  
TGGGTGTGGTGTGGGTGTGGTGTGGTGTGGTGTGGTGTGGTGTGGTGTGGTGTGGTGTGGTGTGGTGTGG  
GGTGTGGG

GTGGGTGTGTGGGTGTGGGTGTGGTGTGTGGGTGTGGTGTGGTGTGGTGTGGTGTGGTGTGGTGTGGT  
TGTGTGGGTGTGGTGTGGGTGTGGTGTGGTGTGGTGTGGTGTGGTGTGGTGTGGTGTGGTGTGGTGTGG  
TGGGTGTG

GTGGGTGTGGTGTGGGTGTGGTGTGTGGGTGTGGTGTGGTGTGGTGTGGTGTGGTGTGGTGTGGTGTGGT  
GGGTGTGGGTGTGGTGTGTGTGGGTGTGGTGTGGTGTGGTGTGGTGTGGTGTGGTGTGGTGTGGTGTGG  
GGTGTGGG

AATAGGGTTAGGGTAGTGTAGGGTAGTGTAGGGTAGTGTAGGGTAGTGTAGGGTAGTGTAGGGTAGTGTAGGGT  
TGGGTGTGTGGGTGTGGGTGTGGTGTGTGGGTGTGGTGTGTGGGTGTGGTGTGGTGTGGTGTGGTGTGGT  
GTGTGGGT



CATAGCTTTGTTTGGGGTCATCATGCCGTGCTGTTGGTACTGTCCATTCTGTGGAGGTGGTACTGAAGCAG  
GTTGAGGAGAGACATGATGATGGTTCTCTGGAACAGCTGATGTCCCAGGTGTTGTCTCTTGTGAGAATTA  
ACCTTAGT

TTGTGTAAGTGGAGGTTGTACCTTCAGTGATGGTAATGTATGAGTCAATAGATAGACTAGTGACAGCAGAC  
ACAGGAGGTTCTGTGAAGTCTGTGGAGGGGTCTGGCCTGGTGCCTGTTTCAGCTACTGCGCTCCCTGTGCA  
TGTGGTTCG

TAAGAGACAGGTTTATCAGGGTTGGATTAGAATAGGGTTAGGGTAGTGTTAGGGTAGTGTTAGGGTAGTGT  
GTGGGTGTGGTGTGTGGGTGTGTGGGTGTGTGGGTGTGGGTGTGGTGTGTGGGTGTGGTGTGT  
GGGTGTGG

TACTTGGCTTCTTGGCTCCATATTTTCGACCTCGAAGAAATCCTGTTTACCACACCACTCAGGTCACCAGCA  
CCTCTGATAACATGGTACTTCACACCAGGCAAGTCTGACAACGCCACCTCTGACATATAACAATCGAATG  
CTCTTGAG

AGCATGCAATACAGTGACATATATATACCCACACCCACACCCACACACCACACCCACACACCCACACCCACA  
CCCACACCCACACACCCACACCCACACCCATCACAACCCTAACCTACCCTATTCTAACCTGATGAACGT  
GTCTCTCA

GGCACAATCAACGAAGAATACAGGTGCTACTTCATCTCCTTCGCCAGCAAGTGCTACAGCGGCTCCAGCAC  
CACCACCTCCTCCACCAGCCCCACCAGCTTCCGTCTTTGAAATCTCTAATGATACACCAGCAACGAGTAGT  
GATGCTAA

CCTTCAGTGATGGTAATGTATGAGTCAATAGATAGACTAGTGACAGCAGACACAGGAGGTTCTGTGAAGTC  
TGTGGAGGGGTCTGGCCTGGTGCCTGTTTCAGCTACTGCGCTCCCTGTGATGTGGTCTCTTTACACTGG  
AGGATGAA

AGATAAGGATGAAGGTATTAGTATGCAGCAATTCTACAATTGGGTGACTTCATACTCCAACAGGCTGGTCT  
TCCACCAGTCTCAGGCCAAGTTTCAGCAAAGAGAGGACCATCCGGCCCCTGCAACGGAATCTTCGTCTTTG  
ATGCCGCC

AGTTAGAGGCCATAGCTTTGTTTGGGGTCATCATGCCGTGCTGTTGGTACTGTCCATTCTGTGGAGGTGGT  
ACTGAAGCAGGTTGAGGAGAGACATGATGATGGTTCTCTGGAACAGCTGATGTCCCAGGTGTTGTCTCTTG  
TTGAGAAT

ATACAGATGGTAGCGGCGGGTGGTGGTGTCTCCCTTGGGTTTGCCGAACAATGCCATGGGTGGAGGA  
GGAGGTGGTGGTGGTGGAGGGGGAGGAGCAGGAGAATCCCCAGTAGTTTCTTGCTTGACAGTGTGCTCTTC  
CGACTTTT

AGCGGAGGCCAGGTTTTGCATTGAGTTACCATTATTAGTCGTGTTTCGAGACCTGCGTGTGGATGACGGGTG  
CAGAGTCAATCGACATGTCTGTGAGAGAGGGGTTGGAGTCCGTGGAGGAGACACTACTAAACCTTCTTTGG  
CGTTGTTG

TGGTAATGTATGAGTCAATAGATAGACTAGTGACAGCAGACACAGGAGGTTCTGTGAAGTCTGTGGAGGGG  
TCTGGCCTGGTGCCTGTTTCAGCTACTGCGCTCCCTGTGATGTGGTCTCTTTACACTGGAGGATGAACC  
AGACGAAG

CGCAATCACCAATCGTACATAGCAGCAACAACACGCTGCACCACCACGAGCACCAACAACACTTGCCGCC  
ACACTAGAGTCGCTATCCTCCAAGTCGCACTCTGTGCCAGACTTAAATACAGCTACTCCAGCTCTCCGAA  
ACGAATGC

TCTAGGTGTTGGTATGCAAGGTGACATTTTCGGTATTGTTGTCCCAAGAAACACAACACTGTTCCAACCATCA  
AGAGAAGAACCTTCACAACTGTCAGTGACAACCAAAACCACCGTTCAATTCCAGTCTACCAAGGTGAACGT  
GTCAACTG

AGTCCATGGAAGCTTTATGTTCTGTAGTATCATTTTTGAATAGAAGAAGCAGAGAAAAGCAGAGGAAGATGGT  
GCCGACAACGAGGCGCCTGCAGTCGTGGTGTGTGTGACTGGGATGTTTAACTTTGACTGGACTGACTCATT  
GTGCTGTA

AATATTCCTTCTACAATGACATCCATACTAAGTTTTCAATAGAGACCAACAGCAGCCGCTATCTCAACCACT  
GCCTCCTCCTCCACAACAGCAACAGGATCTCCACACGCACAATTTACATACTATAACCAAGGAAACCTGGAA  
TGGTTCAA

TTTCTCCCTTGGGTTTGCCGAACAATGCCATGGGTGGAGGAGGAGGTGGTGGTGGTGGAGGGGGAGGAGCA  
GGAGAATCCCCAGTAGTTTTCTTGCTTGACAGTGTGCTTCCGACTTTTTCTCTTTCTCCAACGATTCACC  
GAACAATT

ACATAATTAGATGCTGTGACGAGCTTTATTGCGTATGTCCCACCCAGTTCCTGTACAAGTGATTTGCCAC  
AGACACACCAAACACACCAGCACCAACAACAATATGTTCTTTGTGTTAATTGTCATATATTTTGCAATTT  
CTTTCTTC

GGTATGCAAGGTGACATTTTCGGTATTGTTGTCCCAAGAAACACAACCTGTTCCAACCATCAAGAGAAGAAC  
CTTCACAACCTGTCAGTGACAACCAAACCACCGTTCAATTTCCAGTCTACCAAGGTGAACGTGTCAACTGTA  
AAGAAAAC

CATTTTGAATAGAAGAAGCAGAGAAAAGCAGAGGAAGATGGTGCCGACAACGAGGCGCCTGCAGTCGTGGTG  
TGTGTGACTGGGATGTTTAACTTTGACTGGACTGACTCATTGTGCTGTAGCCTAATGGCATCGGCCACGTC  
AAATCTAG

AATACGCTGGTTACTATCAGCAGTGAAAGAGCATTTCGAAGAGCAGATGATGGCGGCACAGGTGAGCCTGGC  
GAAACAGAGAGAAGAGCTCGAGACTACGGCCCTCAGCTTGCCACGAGATATTGAATTGAGGGGTGAAGAAG  
ATGATATT

CACCTCTACTCATACCACTCACAAGTATGGTAAGTTCAACAAGACTTCCAAGTCCAAGACCCCAAACCACA  
CTGGTACTCACAAGTACGGTAAGTTCAACAAGACCTCCAAGTCTAAGACCCCAAACCATAACCGGTACTCAC  
AAGTATGG

AGCTGGAGGATTACAGTTCTGATTCAAAGACCAGTACGAAGGCTCAGCCTGCCGAACCACAGGCAGAAAAG  
AAACAAGAAGCGCCAGCTGAAGAGACCAAGACTTCTGCACCTGAAGCTAAGAAATCTGACGTTGCTGCTCC  
TCAAGGTA

CTCCATTATCTCTAGGTGTTGGTATGCAAGGTGACATTTTCGGTATTGTTGTCCCAAGAAACACAACCTGTT  
CCAACCATCAAGAGAAGAACCTTCACAACCTGTCAGTGACAACCAAACCACCGTTCAATTTCCAGTCTACCA  
AGGTGAAC

TCTGTAGTATCATTTTTGAATAGAAGAAGCAGAGAAAAGCAGAGGAAGATGGTGCCGACAACGAGGCGCCTGC  
AGTCGTGGTGTGTGTGACTGGGATGTTTAACTTTGACTGGACTGACTCATTGTGCTGTAGCCTAATGGCAT  
CGGCCACG

CAAGGTTTCGGAAGACAAGGCCCAAGGATTTGGAGGTCCTGGTCCACAAGAGTTTGGTGGTCCAGGTGG  
CCAAGGATTCGGTGGTCCAAATCCTCAAGAATTCGGCGGGCCAGGTGGCCAAGGATTCGGTGGTCCAAACC  
CTCAGGAA

TGAGTCAATAGATAGACTAGTGACAGCAGACACAGGAGGTTCTGTGAAGTCTGTGGAGGGGTCTGGCCTGG  
TGCCTGTTTCAGCTACTGCGCTCCCTGTGATGTGGTCTGCTTTTACACTGGAGGATGAACCAGACGAAGAT  
ACAGACGA

CGGTATTGTTGTCCCAAGAAACACAACCTGTTCCAACCATCAAGAGAAGAACCTTCACAACCTGTCAGTGACA  
ACCAAACCACCGTTCAATTTCCAGTCTACCAAGGTGAACGTGTCAACTGTAAAGAAAACACTTTGTTGGGT  
GAATTCGA

CTCTTTGTTTCGATTCCAATGTCTGAAAATAACGAAGAACAACATCAACAACAACAACAACAGCAACCTGTT  
GCCGTGAAACTCCCTCGGCAGTTGAAGCTCCAGCATCAGCAGATCCTTCTTCTGAACAGAGCGTCGCTGT  
CGAAGGCA

GCGGAATGACGCCATCAGTAGATGAAGATAATACAGATGGTAGCGGCGGCGGTGGTGGTGTTCCTCCCTTG  
GGTTTGCCGAACAATGCCATGGGTGGAGGAGGAGGTGGTGGTGGTGGAGGGGAGGAGCAGGAGAATCCCC  
AGTAGTTT

ACGAAGAACAACATCAACAACAACAACAACAGCAACCTGTTGCCGTGAAACTCCCTCGGCAGTTGAAGCT  
CCAGCATCAGCAGATCCTTCTTCTGAACAGAGCGTCGCTGTGCAAGGCAATTCTGAACAAGCTGAAGACAA  
TCAGGGTG

GAAGGTATTAGTATGCAGCAATTCTACAATTGGGTGACTTCATACTCCAACAGGCTGGTCTTCCACCAGTC  
TCAGGCCAAGTTTTCAGCAAAGAGAGGACCATCCGGCCCCTGCAACGGAATCTTCGTCTTTGATGCCGCCG  
CTAACACA

TTGAGTTACCATTATTAGTCGTGTTTCGAGACCTGCGTGTGGATGACGGGTGCAGAGTCAATCGACATGTCT  
GTCAGAGAGGGGTTGGAGTCCGTGGAGGAGACACTACTAAACCTTCTTTGGCGTTGTTGTGACTTAGACTT  
CCTGTTTC

TAGAAAATACACATAATTAGATGCTGTGACGAGCTTTATTGCGTATGTCCCACCCAGTTCCTGTACAAGT  
GATTTGCCACAGACACACCAAACACACCAGCACCAACAACAACATATGTTCTTTGTGTTAATTGTCATATAT  
TTTGCAAT

GTATGCAGCAATTCTACAATTGGGTGACTTCATACTCCAACAGGCTGGTCTTCCACCAGTCTCAGGCCAAG  
TTTCAGCAAAGAGAGGACCATCCGGCCCCTGCAACGGAATCTTCGTCTTTGATGCCGCCCGCTAACACAAC  
AGCAACAC

GTCCCAAGAAACACAACCTGTTCCAACCATCAAGAGAAGAACCTTCACAACTGTCAGTGACAACCAAACCAC  
CGTTCAATTCCCAGTCTACCAAGGTGAACGTGTCAACTGTAAAGAAAACACTTTGTTGGGTGAATTCGACT  
TGAAGAAC

CCACTTTAACTTTGTGCATCGGACGGTAGTTTAACTACTACCACCTCTACTCATACTCACAAGTATGGT  
AAGTTCAACAAGACTTCCAAGTCCAAGACCCCAAACCACACTGGTACTCACAAGTACGGTAAGTTCAACAA  
GACCTCCA

GATAGACTAGTGACAGCAGACACAGGAGGTTCTGTGAAGTCTGTGGAGGGGTCTGGCCTGGTGCCTGTTTC  
AGCTACTGCGCTCCCTGTGCATGTGGTCTGTTTACACTGGAGGATGAACCAGACGAAGATACAGACGAGG  
ACACAGAC

CAGAGTTTAGGTTTCGAGCCAAACATCAATAACATAATATCAGGTCCTGGTGGAATGCATGTGCACACCGC  
TAGGCTGCATCCTTTGGCTGGTCTAGACAAGGGTGTGGAGTATTTAGATCTGGAAGAAGAACAACCTATCCT  
CGTTAGAA

GTGTTTCGAGACCTGCGTGTGGATGACGGGTGCAGAGTCAATCGACATGTCTGTGTCAGAGAGGGGTTGGAGTC  
CGTGGAGGAGACACTACTAAACCTTCTTTGGCGTTGTTGTGACTTAGACTTCCTGTTTCTTGCAACACTTT  
GCAGTTGA

TGAAAGCATCCTCATTACTGAACGCATGTCTCCGGAGAATCCGCCCGCACCGCCAGGGAAGCCTCCAGCA  
CCTCCAGCACCGCCAGGACCACCAGGACCAAAGCTTGACCACCAGATCTAGCAGCCTCGAGACCGTATTG  
ATCATATA

CATCACGATTTACTTGGCTTCTTGGCTCCATATTTTCGACCTCGAAGAAATCCTGTTTACCACACCACTCAG  
GTCACCAGCACCTCTGATAACATGGTACTTACACCAGGCAAGTCTGACAACGCCACCTCTGACATATA  
CAATCGAA



GATTCCAATGTCTGAAAATAACGAAGAACAACATCAACAACAACAACAACAGCAACCTGTTGCCGTCGAAA  
CTCCCTCGGCAGTTGAAGCTCCAGCATCAGCAGATCCTTCTTCTGAACAGAGCGTCGCTGTCGAAGGCAAT  
TCTGAACA

TTTGTTCATCGGACGGTAGTTTAACTACTACCACCTCTACTCATACCACTCACAAGTATGGTAAGTTCAACA  
AGACTTCCAAGTCCAAGACCCCAAACCACTGGTACTCACAAGTACGGTAAGTTCAACAAGACCTCCAAG  
TCTAAGAC

ATTTACAAGAAGATAAGGATGAAGGTATTAGTATGCAGCAATTCTACAATTGGGTGACTTCATACTCCAAC  
AGGCTGGTCTTCCACCAGTCTCAGGCCAAGTTTTAGCAAAAGAGAGGACCATCCGGCCCCTGCAACGGAATC  
TTCGTCTT

GGTTAAATGCTTGGGTAGCTGGGAAGCCAAGGGACGATTGAGTCCCACTCCCTGCTGCTGTTGCTGCTGTT  
GTTGTTGCTGCTGTTGTTGTTGCTGCAGAACGTTTTCAGTCCGGGCGGCAAACTAGCCACCGAAACAGGCGTT  
CCTATATT

TCCAAACCATAACGGTACTCACAAGTACGGTAAGTTCAACAAGACCTCCAAATCCAAGACTCCAAACCACA  
CTGGTACTCACAAGTACGGTAAGTTCAACAAGACCTCCAAGTCTAAGACCCCAAACCATACCGGTACTCAC  
AAGTATGG

CACCAATCCTAATATTCTTCTACAATGACATCCATACTAAGTTTTCAATAGAGACCAACAGCAGCCGCTAT  
CTCAACCACTGCCTCCTCCTCCACAACAGCAACAGGATCTCCACACGCACAATTTACATACTATAACCAAGG  
AAACCTGG

CCCCACGTAATGAGTTGTTTATTCTCCCTTATGTGAGAGCTGCATGGCTTGGGGACAGTCAGAGATACAA  
GAACAGCAGGATTAATTGAGGGCTGAGAGATCGGACCTTTGTCAACGTCCCAACCTGTGGGGACGTCCACC  
GAAACAAT

ATTGATAACGATTGGCCTGTTGCTGGGCCTGGGCTTGTGCAATTGTTGTTGCTGCACTTTGGCTTGTGCT  
TGAGCCTGTGCTTGAGCCTGAGCCTGCTGTTGTTGTTGCTGTTGATTGTAATGATGGTGATGATCGGGTGA  
TGAATATT

ACCACCAGCGTCTCTATCAGAAGAACTGGAGCAACGATTTCTCGGTGTCAAGTTTTACGGTCGCCAAGAAGG  
CAGACTCGCTCTACTGCATGGTCAAGTGTGGCGAGTGTGCTTGCAAAAGTGACCAGAGATATACTAGTCGAA  
TCCTTGAA

TCTGAAAATAACGAAGAACAACATCAACAACAACAACAACAGCAACCTGTTGCCGTCGAAACTCCCTCGGC  
AGTTGAAGCTCCAGCATCAGCAGATCCTTCTTCTGAACAGAGCGTCGCTGTCGAAGGCAATTCTGAACAAG  
CTGAAGAC

ATCGGTGGCATACTTTGGTTGGTTAAATGCTTGGGTAGCTGGGAAGCCAAGGGACGATTGAGTCCCACTCC  
CTGCTGCTGTTGCTGCTGTTGTTGTTGCTGCTGTTGTTGTTGCTGCAGAACGTTTTCAGTCCGGGCGGCAAA  
TAGCCACC

CATACCACTCACAAGTATGGTAAGTTCAACAAGACTTCCAAGTCCAAGACCCCAAACCACTGGTACTCA  
CAAGTACGGTAAGTTCAACAAGACCTCCAAGTCTAAGACCCCAAACCATACCGGTACTCACAAGTATGGTA  
AGTTCAAC

AGAAGAAGCAGAGAAAGCAGAGGAAGATGGTGCCGACAACGAGGCGCCTGCAGTCGTGGTGTGTGACTG  
GGATGTTTAACTTTGACTGGACTGACTCATTGTGCTGTAGCCTAATGGCATCGGCCACGTCAAATCTAGAT  
TCTAATAT

TTGCCAACGAACAAGGTAACAGAGTTACTCCATCTTTTCGTTGCCTTACCCACAGGAAAGATTGATCGGT  
GATGCTGCCAAGAACCAAGCTGCTTTGAACCCAAGAAACTGTTTTTATGCTAAGCGTTTGGATTGGTAG  
AAGATTTCG

AATTTGTTTTGCCCAACTGTAGATCAAGTTGTGATTTGGAGGCCTCCTTTGAAAGTAGTGACGAGGAAGAT  
GAAAGTGATGTGGAAAGTGAAGGTGATCAACTGGTGGATCAACTTAGCGTCTTAATGGAACTTCAAAGGA  
TGTTGATA

ACAATAACAACAATAACGGTGGATTTGGCGGTCCAGGCGGCCCTGGCGGTCAAGGTTTCGGAAGACAAGGC  
CCACAAGGATTTGGAGGTCTGGTCCACAAGAGTTTGGTGGTCCAGGTGGCCAAGGATTCGGTGGTCCAAA  
TCCTCAAG

ATACAAGGCCAGTTACTACCTGAAGTGACTGTAAGGGCACTCTGCTTTAAGCTGAAGGAAATGCTAGTGA  
AGGAGTCAAACGTGATTCACATTCAGACCCCTGTACAGTTCGTGGGGGATATGCATGGACAGTTTCACGAT  
ATGCTGGA

GTGACATTTTCGGTATTGTTGTCCCAAGAAACACAACCTGTTCCAACCATCAAGAGAAGAACCTTCACAAC  
GTCAGTGACAACCAAACCACCGTTCAATTCAGTCTACCAAGGTGAACGTGTCAACTGTAAAGAAAACAC  
TTTGTGG

CAACAACAACAGCAACCTGTTGCCGTGCAAACTCCCTCGGCAGTTGAAGCTCCAGCATCAGCAGATCCTTC  
TTCTGAACAGAGCGTCTGCTGCGAAGGCAATTCTGAACAAGCTGAAGACAATCAGGGTGAATGATCCTT  
CCGTAGTT

ACCACATCTACTCTTTGTTGATTCCAATGTCTGAAAATAACGAAGAACAACATCAACAACAACAACA  
GCAACCTGTTGCCGTGCAAACTCCCTCGGCAGTTGAAGCTCCAGCATCAGCAGATCCTTCTTCTGAACAGA  
GCGTCGCT

TAGCGGCGGCGGTGGTGGTGTCTCCCTTGGGTTTGCCGAACAATGCCATGGGTGGAGGAGGAGGTGGTG  
GTGGTGGAGGGGAGGAGCAGGAGAATCCCCAGTAGTTTCTTGCTTGACAGTGTCTCTCCGACTTTTTTC  
TCTTTCTC

CAATAACGGTGGATTTGGCGGTCCAGGCGGCCCTGGCGGTCAAGGTTTCGGAAGACAAGGCCCAAGGAT  
TTGGAGGTCTGGTCCACAAGAGTTTGGTGGTCCAGGTGGCCAAGGATTCGGTGGTCCAAATCCTCAAGAA  
TTCGGCGG

CACCGTCAGGACAATAACAACAATAACGGTGGATTTGGCGGTCCAGGCGGCCCTGGCGGTCAAGGTTTCGG  
AAGACAAGGCCCAAGGATTTGGAGGTCTGGTCCACAAGAGTTTGGTGGTCCAGGTGGCCAAGGATTCG  
GTGGTCCA

TGGTTGTTGGTAATGTGCCAGTTAGAGGCCATAGCTTTGTTTGGGGTCATCATGCCGTGCTGTTGGTACT  
GTCCATTCTGTGGAGGTGGTACTGAAGCAGGTTGAGGAGAGACATGATGATGGTTCTCTGGAACAGCTGAT  
GTCCCAGG

GGCCTTGCTAACACCATCCAGCATGCAATACAGTGACATATATATACCCACACCCACACCCACACACCAC  
ACCCACACACCCACACCCACACCCACACCCACACCCACACCCATCAACAACCTAACCTACCT  
ATTCTAAC

GGCAGTTGGGTTAGCCACATTTTGGCCTTTAATATCTAAACCAACATGTCTGGAACCTGGTTCGAAGACAG  
CATAGTCCCTGCCAAAGTTGGCACCTGCCACCAATCCTGGACCACCGATCAAAGCAGCGCCAATGTTGCCT  
AAGATGGT

TCTGTAAGCTCGCAATCACCAATCGTACATAGCAGCAACAACACGCTGCACCACCACGAGCACCAACAACA  
CTTGCCGCCACACTAGAGTGCCTATCCTCCAAGTCGCACTCTGTGCCAGACTTAAATACAGCTACTCCCA  
GCTCTCCG

TGTCAGAGAGGGGTTGGAGTCCGTGGAGGAGACACTACTAAACCTTCTTTGGCGTTGTTGTGACTTAGACT  
TCCTGTTTCTTGAACACTTTGCAGTTGATGCTGTTGCTGCTGATTAAACAATTGGGTGGCCTTGTTCGTG  
TTTTCCAG

TACTTTGGTTGGTTAAATGCTTGGGTAGCTGGGAAGCCAAGGGACGATTGAGTCCCCTCCCTGCTGCTGT  
TGCTGCTGTTGTTGTTGCTGCTGTTGTTGTTGCTGCAGAACGTTTCAGTCCGGGCGGCAAACCTAGCCACCGA  
AACAGGCG

ATTATTAGTCGTGTTTCGAGACCTGCGTGTGGATGACGGGTGCAGAGTCAATCGACATGTCTGTCAGAGAGG  
GGTTGGAGTCCGTGGAGGAGACACTACTAAACCTTCTTTGGCGTTGTTGTGACTTAGACTTCCTGTTTCTT  
GCAACT

CAGTTACTACCTGAAGTGAAGTGAAGGGCACTCTGCTTTAAGCTGAAGGAAATGCTAGTGAAGGAGTCAAA  
CGTGATTACATTCAGACCCCTGTCACAGTCGTGGGGATATGCATGGACAGTTTCACGATATGCTGGAGA  
TCTTCCAA

ACATCAACAACAACAACAACAGCAACCTGTTGCCGTGAAACTCCCTCGGCAGTTGAAGCTCCAGCATCAG  
CAGATCCTTCTTCTGAACAGAGCGTCGCTGTGCAAGGCAATTCTGAACAAGCTGAAGACAATCAGGGTGAA  
AATGATCC

TAATGTGCCAGTTAGAGGCCATAGCTTTGTTTGGGGTCATCATGCCGTGCTGTTGGTACTGTCCATTCTG  
TGGAGGTGGTACTGAAGCAGGTTGAGGAGAGACATGATGATGGTTCTCTGGAACAGCTGATGTCCAGGTG  
TTGTCTCT

AGCTTTATGTTCTGTAGTATCATTTTTGAATAGAAGAAGCAGAGAAAGCAGAGGAAGATGGTGCCGACAACG  
AGGCGCTGCAGTCGTGGTGTGTGTGACTGGGATGTTAACTTTGACTGGACTGACTCATTGTGCTGTAGC  
CTAATGGC

TACGTACTTATTTAATCTTTCTAGTAGACAATCTTTCTACCGGTGAAGGTTCTTCTTGCCTGTTGTCTGCC  
TTCTGCACTCAATTCATCATTTTTCATCATCTTCGTCCACCTTGGCTCTATTTAAGACTTTGATGAACGAGT  
CCTACTCTG

TCATATCCGCAATTTGTTTGGCCCAACTGTAGATCAAGTTGTGATTTGGAGGCCTCCTTTGAAAGTAGTGA  
CGAGGAAGATGAAAGTGATGTGGAAGTGAAGGTGATCAACTGGTGGATCAACTTAGCGTCTTAATGGAAA  
CTTCAAAG

TAAGTTCAACAAGACTTCCAAGTCCAAGACTCCAAACCATAACCGTACTCACAAGTACGGTAAGTTCAACA  
AGACCTCCAATCCAAGACTCCAACCACACTGGTACTCACAAGTACGGTAAGTTCAACAAGACCTCCAAG  
TCTAAGAC

ATCCAAGCGATCTGTAAGCTCGCAATCACCAATCGTACATAGCAGCAACAACACGCTGCACCACCACGAGC  
ACCAACAACACTTGCCGCCCACACTAGAGTCGCTATCCTCCAAGTCGCACTCTGTGCCAGACTTAAATACA  
GCTACTCC

AGCTGAAGAAGCTGAAGAAGCCGAAATGGAGTTAGTGGAAGCGGAGAACATGCAACCAAGAGCAGACATAT  
TGCCCACTGAGGAGCAGGAAGAAATGATGGCACAAGAACTCCTAATTTAACTTCCACAAGAACAAGAATG  
ATTGAAAT

GAAGACAAGGCCCAAGGATTTGGAGGTCTGGTCCACAAGAGTTTGGTGGTCCAGGTGGCCAAGGATTC  
GGTGGTCCAATCCTCAAGAATTCGGCGGGCCAGGTGGCCAAGGATTCGGTGGTCCAACCCTCAGGAATT  
CGGGGGCC

CTGTTGGTACTGTCCATTCTGTGGAGGTGGTACTGAAGCAGGTTGAGGAGAGACATGATGATGGTTCTCTG  
GAACAGCTGATGTCCAGGTGTTGTCTCTTGTGAGAATTAACCTTAGTGGAATCTCTATCAAATTCGGT  
AAATTGGA

AAGGACTTTAAGCTGGAGGATTCAGGTTCTGATTCAAAGACCAGTACGAAGGCTCAGCCTGCCGAACCACA  
GGCAGAAAAGAAACAAGAAGCGCCAGCTGAAGAGACCAAGACTTCTGCACCTGAAGCTAAGAAATCTGACG  
TTGCTGCT

TGAATCTTCCCCCACGTAATGAGTTGTTTGATTCTCCCTTATGTGAGAGCTGCATGGCTTGGGGACAGTC  
AGAGATAACAAGAACAGCAGGATTAATTGAGGGCTGAGAGATCGGACCTTTGTCAACGTCCCAACCTGTGGG  
GACGTCCA

GCACGTGTGGTTGTGTAAGTGGAGGTTGTACCTTCAGTGATGGTAATGTATGAGTCAATAGATAGACTAGT  
GACAGCAGACACAGGAGGTTCTGTGAAGTCTGTGGAGGGGTCTGGCCTGGTGCCTGTTTCAGCTACTGCGC  
TCCCTGTC

CCTGCGTGTGGATGACGGGTGCAGAGTCAATCGACATGTCTGTGAGAGGGGTTGGAGTCCGTGGAGGAG  
ACACTACTAAACCTTCTTTGGCGTTGTTGTGACTTAGACTTCCTGTTTCTTGCAACACTTTGCAGTTGATG  
CTGTTGCT

GTGTTTTGACCCTTAGGAGCTCTGACAGCTAATTGATCTAAAGTGATACATTCACCGCCAGCCTTAACGAT  
CTTGGCTCTGGCACCAGCAGTGAATCTCAAAGCAGCAACAGTGGTCTTTGGGAATTCGAAGATCCTGGCAT  
CGTCAGTA

GAAGCTGTTTCAATTCCGGTGATGGCAAAGGTCCGTATTGGACACTTCGTGGAGGCACAGATCCTGGAAGA  
GCTGCAAGTAGACTACATTGACGAAAGCGAGGTTTTGACTCCAGCTGATTGGACACATCACATTGAGAAGC  
ATAACTTC

TCCTATCAGAAGAACTGGAGCAACGATTTCTGGTGTCAAGTTTACGGTCGCCAAGAAGGCAGACTCGCT  
CTACTGCATGGTCAGTGTGGCGAGTGTGTTGCAAAAGTGACCAGAGATATACTAGTCGAATCCTTGAAGA  
GGGATCCC

GGTCATGCTCTCATATCCGCAATTTGTTTGCCCCAACTGTAGATCAAGTTGTGATTTGGAGGCCTCCTTTG  
AAAGTAGTGACGAGGAAGATGAAAGTGATGTGGAAAGTGAAGGTGATCAACTGGTGGATCAACTTAGCGTC  
TTAATGGA

ATCATGCACTGCTGTTGGTACGGCCATTCTGTGGTGAATGTGACTGAGCAGTTTGAGGAGAGGCATGATG  
GGGTTTCTCTGGAACAGCTGATGAAGCAGGTGTTGTTGTCTGTTGAGAGTTAGCCTTAGTGGAAGCCTTAT  
CATATTCT

TCAGAGTCCGCTGAGGATGAATCAGTAAATGTATTACCTGACTCAGGTGATGGAGTGCTCAGAGGCGTTCC  
AACTGATGATGGATACTGCGGAACTGTGAATGTGGCCAGGTGGAAAGTACATAGGCGACATTTGATAAG  
GTGTATAC

ACGAAGAATACAGGTGCTACTTCATCTCCTTCGCCAGCAAGTGCTACAGCGGCTCCAGCACCACCACCTCC  
TCCACCAGCCCCACCAGCTTCCGTCTTTGAAATCTCTAATGATACACCAGCAACGAGTAGTGATGCTAACA  
AAGGCGGT

ACCGGTACTCACAAGTACGGTAAGTTCAACAAGACCTCCAAATCCAAGACTCCAAACCACACTGGTACTCA  
CAAGTACGGTAAGTTCAACAAGACCTCCAAGTCTAAGACCCCAACCATAACCGGTACTCACAAGTATGGTA  
AGTTCAAC

TCGGAGAGACTGTCGTTGGAAGGAACATCTACTGTACTTTTCGTCGGCTACCACAACATGTGAGTCTTCATC  
AGCGTCATCTTACCATCCTCATAGTCTTCTGTTTCTTCTGGAACATTAGTATCCTCTTGTACTTCGCCTT  
CCTGGTTC

TAAGAAGATTGGTCATGCTCTCATATCCGCAATTTGTTTGCCCCAACTGTAGATCAAGTTGTGATTTGGAG  
GCCTCCTTTGAAAGTAGTGACGAGGAAGATGAAAGTGATGTGGAAAGTGAAGGTGATCAACTGGTGGATCA  
ACTTAGCG

GCCTCGAACAATTTTCGACGCTACAATGTACGGATCCGGTTCTCCTCCTCGGAAGACGCACTAGATGAGCACAG  
AAGATGGAAGAGTTTGTGATACAAAGGACAAGTTTGTGCAAGGTCTATCTAATAACAAGTATAAGATCATCA  
CCGGTGCC

CTCATTACTGAACGCATGTCCTCCGGAGAATCCGCCCGCACCGCCAGGGAAGCCTCCAGCACCTCCAGCAC  
CGCCAGGACCACCAGGACCAAAGCTTGGACCACCAGATCTAGCAGCCTCGAGACCCTATTGATCATATATT  
TCCCTTTT

CGAAGCTGCTTTGTCCGATGCTTTGGCTGCTTTGCAAATCGAAGACCCATCCGCTGATGAGTTGAGAAAGG  
CAGAAGTTGGTTTGAAGAGAGTTGTCACCAAGGCCATGTCTTCTCGTTAAGATGTCATTCTGGTTAAGGTT  
ATACACAT

GAAGTAAGATTACGGCTTGGACATGTTTCGATGAAATTGGTTTTCGCTCCAGATGCTGAAGGTGAGTACAAG  
TCCTCATACTGCTCTCACATGGATTGTTTTCCGTTGGGTGAAGCGTGATTCTTATTTACCACAAGGTTCCCA  
GGGTTTAA

TTAGATGTTGCTCCATTATCTCTAGGTGTTGGTATGCAAGGTGACATTTTCGGTATTGTTGTCCCAAGAAA  
CACAACCTGTTCCAACCATCAAGAGAAGAACCTTCACAACCTGTCAGTGACAACCAAACCACCGTTCAATTCC  
CAGTCTAC

GCAGAGTCAATCGACATGTCTGTGACAGAGGGGGTTGGAGTCCGTGGAGGAGACACTACTAAACCTTCTTTG  
GCGTTGTTGTGACTTAGACTTCCCTGTTTTCTTGCAACACTTTGCAGTTGATGCTGTTGCTGCTGATTAACA  
ATTGGGTG

TGCCAAGGATCTAGGTGAGGCTTTGAGAAGAATAAACGAAGGTGCTGCAATGATCCGTACCAAAGGTGAAG  
CAGGTACCGGTGACGTTTTCCGAGGCCGTCAAGCACATCACCAAGATTAAGGCGGAGATCCAGCAGTATAAA  
GAGAATTT

ATGATTCCGTATACACCTTATCAAATGTCGCCTATGTACTTTCCACCTGGGCCACATTCACAGTTTCCGCA  
GTATCCATCATCAGTTGGAACGCCTCTGAGCACTCCATCACCTGAGTCAGGTAATACATTTACTGATTCAT  
CCTCAGCG

GCCTTTAGTTCTGGAGAGGAGCTTTCTAGATCGATGAAGGTCTTGGCGACTTGTAATTCCAACTCACTTGG  
AGCTTGGGATAAGATCTTGGATTGGACAGAGGACATTGGTCAGTTATGTGTCTAGTCTTTAGTGTGTTGGT  
TTCTCTTC

GAATCTTCAGTATGAGTTGACGGAGGTGTGGAATCGGTTGGACTCACAGCTTTTGAAGGACATTTCTCGG  
TTGCTCAGGATGTAGTTGATGTCAGATTGGAAGTCATGGTCAGATTCTATGTTAAGATCATCGGATTGTT  
GGATCTCA

TGACATTGAGTCATATCTAGAAAAGTCGTCTAAGCAGTCTTCTCAAACCAGTGGTGTGCCGCCGCCACTC  
CTGCCGCCGCTACCTCAAGCACTACTGCTGGCTCTGCTCCATCGCCTTCTTCTACAGCATCATATGAGGAT  
GTTCCAAT

TGTTACGTATAATACGCTGGTTACTATCAGCAGTGAAAGAGCATTTCGAAGAGCAGATGATGGCGGCACAGG  
TGAGCCTGGCGAAACAGAGAGAAGAGCTCGAGACTACGGCCCTCAGCTTGCCACGAGATATTGAATTGAGG  
GGTGAAGA

ACAGTGACATATATATACCCACACCCACACCCACACACCACACCCACACACCCACACACCCACACCCACACCCA  
CACACCCACACCCACACCCATCACAACCCTAACCCCTACCCTATTCTAACCCCTGATGAACGTGTCTCTCAAC  
TTACCCTC

AACACACCCTAGCAGCAACAACGGTGCTAATAATAATGGCATGGGGAGCACGAACTCGTTGGACCAGTTTG  
TGGCAACAGCCTCATCGTCATCTTCTCTGGTGACCAGCAGCGAGAATAGGCGCCCCCTAATAGGTGACGTT  
ACCAATAG

TAACTACTACCACCTCTACTCATACCACTCACAAGTATGGTAAGTTCAACAAGACTTCCAAGTCCAAGACC  
CCAAACCACACTGGTACTCACAAGTACGGTAAGTTCAACAAGACCTCCAAGTCTAAGACCCCAAACCATA  
CGGTACTC

AGAACGTGAAGCTCAGTCACGTGTATGTGGATACTGTTGGACCACCAGCGTCCTATCAGAAGAACTGGAG  
CAACGATTTCTGGTGTCAAGTTTACGGTCGCCAAGAAGGCAGACTCGCTCTACTGCATGGTCAGTGTGGC  
GAGTGTCC

ATGAGTTTGGAGTCCATGGAAGCTTTATGTTCTGTAGTATCATTTTTGAATAGAAGAAGCAGAGAAAGCAGA  
GGAAGATGGTGCCGACAACGAGGCGCCTGCAGTCGTGGTGTGTGTGACTGGGATGTTAACTTTGACTGGA  
CTGACTCA

ATGAAGAAGAAGCTGAAGAAGCTGAAGAAGCCGAAATGGAGTTAGTGGAAGCGGAGAACATGCAACCAAGA  
GCAGACATATTGCCCACTGAGGAGCAGGAAGAAATGATGGCACAAGAACTCCTAATTTAACTTCCACAAG  
ACAAGAA

TGCTGTTGGTTAAGCATATTCATCAAAGAATTCAATTGAGCAGTGGGGTCAAATTGTTGCTGAGGTACAGG  
GGGAGCCGCTGCGGCAGGTCCCTGAGAAGGTAATGGTTGGTTGGGGGCATAACCATACGGTTGCTGCATCA  
TAGGTTGC

CCGTTGCTGTGCAAGTTGAGGATGAGGTGCATGTGGTGGATGAAGAAGTTGCCTGCGTAGAGGACGTTTTCT  
GAACTGGAAGAGGCAGAAGTGCTAGAGGAAGTGGTGAAGGAGAAGAAGAAGTAGAAGTAGTACTAGAGGT  
AGTAGAAG

GGGACCTATGCATCCAAACAATTCTCAACGATCTTTGCAGCAGCAGCAGCAGCAGCAGCAGCAACAAAAAC  
AACAGCATCAACAATATCCATACCACCATCAAGGACCATCTCCATCTCCATCCCATCTCCGTCTCCATTA  
AACCTTA

CTCTAGGAATTGAAAGCATCTTAGATACGTATGCACTAACTGGTCCTTCTTTATCACATGTCTTCATGGCT  
TTCAGAAGTCTTGGATCCATGGCTGCTGTGTCGGATTTCGGAGACCAAAATAGTGTTCAAACGATCGGTTTG  
TGATTCCA

AAGAGGTACTTTGACCAAGAACTTGAAGCATATTGATGTTACCTTCACCAAGGTCAACAACCAATTGATCA  
AGGTTGCTGTTTACAACGGTGACAGAAAGCACGTTGCCGCTTTGAGAACCCTTAAATCTTTGGTTGACAAC  
ATGATCAC

TCTCAGTGGTTTCTTTAGCTTGGTGTGCTTTCTCCAAGTCTTCTTCCAATTGCTGGTTCTTCTTGGAG  
AAATTGTCGTTGTTGGACTGCAAGTGGTGAGAGTCTTCGGACAATTGCTTGGATTTCAGCCAATTCTGCTTC  
CAACTTCT

ACAGTGGACGACGAGGGCGAACTATATGGGTAGACACCTCCGGCAACTCACCAGCCAATGAACACACAGC  
TACCACAATTACACAGAATCACAGCGTGGTGGCCTCAAACGGGAGACGTCGCATTTCATCCAGGAACTGCTA  
CCGAAGGC

GGTAATTCCTTCTAGGAATTGAAAGCATCTTAGATACGTATGCACTAACTGGTCCTTCTTTATCACATGT  
CTTCATGGCTTTTACAAGTCTTGGATCCATGGCTGCTGTGTCGGATTTCGGAGACCAAAATAGTGTTCAAAC  
GATCGGTT

TTAGCCACATTTTGGCCTTTAATATCTAAACCAACATGTCTGGAACCTGGTTTGAAGACAGCATAGTCCCT  
GCCAAAGTTGGCACCTGCCACCAATCCTGGACCACCGATCAAAGCAGCGCCAATGTTGCCTAAGATGGTAC  
CGTACATT

TTACATTGCCATCACACGTAAACTGGATACGCACGATTTGGCAAGAGACAGAGTAGATGACATCACTGAGG  
TCCTTTCTACCATCCAACAACCATCCCTGATCATCGGTATCCAATCTGATGGACTGTTTACATATTCAGAA  
CAAGAATT

GGATTTGGCGGTCCAGGCGGCCCTGGCGGTCAAGGTTTTCGGAAGACAAGGCCACAAGGATTTGGAGGTCC  
TGGTCCACAAGAGTTTGGTGGTCCAGGTGGCCAAGGATTCGGTGGTCCAATCCTCAAGAATTCGGCGGGC  
CAGGTGGC

CCGAGAGCAATCATCCCTATATGCCGCTGCTTTAACTTCCGCTTACCTCTCTTCTTTCTTGTGGTGAGCT  
CTCTGTTTTCTTAGCAGCATCATCCTCGACTTTTCTCTCTGTGGTGATGGCCTTCGTAACGTTCTCCCCAG  
AATATTGT

TCAATGTCGCTTGCATTGTCTGTAGTGGAGGAAAACAATCTCTGCGCCTGTCTCAAGGGCGTACACCATGTG  
TTGGACATAAACCTCGACAACATGGCTCTTGTGGCCTGCTTCAATTCTGGTGTACCTGTAAGTTCTCCGT  
CTTTTCCC

GACGAGCAATATTTACAAGAAGATAAGGATGAAGGTATTAGTATGCAGCAATTCTACAATTGGGTGACTTC  
ATACTCCAACAGGCTGGTCTTCCACCAGTCTCAGGCCAAGTTTTAGCAAAGAGAGGACCATCCGGCCCCTG  
CAACGGAA

CAATTCGGGTGATGGCAAAGGTCCGTATTGGACACTTCGTGGAGGCACAGATCCTGGAAGAGCTGCAAGTA  
GACTACATTGACGAAAGCGAGGTTTTGACTCCAGCTGATTGGACACATCACATTGAGAAGCATAACTTCAA  
GGTGCCAT

ACACCACACCCACACCACACCCACACCCACACACACACACACACACACACACACACACACACACACACAC  
CCCACACACCACACCACACCCACACACCACCCACACACACAACACTACCCTAATCTAACCTGTCCAAC  
CTGTCTCC

CACACCACACCCACACCCACACACCACACCCACACACACACACACACACACACACACACACACACACACAC  
ACACCACACCCACACACCACCCACACACACAACACTACCCTAATCTAACCTGTCCAACCTGTCTCCAA  
ACTTACCC

TGTTTTGGGGTCATCATGCCGCTGCTGTTGGTACTGTCCATTCTGTGGAGGTGGTACTGAAGCAGGTTGAGGA  
GAGACATGATGATGGTTCTCTGGAACAGCTGATGTCCAGGTGTTGTCTCTTGTGAGAATTAACCTTAGT  
GGAATCTC

TTCAGCGCTGGTGTCTCTAAGTTTTATATCGTTGACAATGGTGCCTGTCTGCTTGGCCAACCTGAGTGGCCT  
TCACCATCAGTTCCACCTCCTCTCTGTTCTGTGTGTCCACTTGATTTTTGTAGATGTGATATGTACTCTACC  
GCCTGTGT

ACAGGGCGACTTCAGCGCTGGTGTCTCTAAGTTTTATATCGTTGACAATGGTGCCTGTCTGCTTGGCCAAC  
TGAGTGGCCTTACCATCAGTTCCACCTCCTCTCTGTTCTGTGTGTCCACTTGATTTTTGTAGATGTGATAT  
GTACTCTA

CCACACCCACACACACACACACACACACACACACACACACACACACACACACACACACACACACACACAC  
CACACACACCCACACACACAACACTACCCTAATCTAACCTGTCCAACCTGTCTCCAACTTACCCTC  
CATTACCT

GCCATAGCTTTGTTTGGGGTCATCATGCCGCTGCTGTTGGTACTGTCCATTCTGTGGAGGTGGTACTGAAGC  
AGGTTGAGGAGAGACATGATGATGGTTCTCTGGAACAGCTGATGTCCAGGTGTTGTCTCTTGTGAGAAT  
TAACCTTA

AAGTTGCTAGCTCTTCTATTGCTTCATCCACTAGCTCTTCTGTTGCACCATCCTCAAGTGAAGTTGTCAGC  
TCTTCCGTTGCACCATCCTCAAGTGAAGTTGTCAGCTCTTCCGTTGCACCATCCTCAAGTGAAGTTGTCAG  
CTCTTCCG

ACACCACACCCACACACACACACACACACACACACACACACACACACACACACACACACACACACACACAC  
CCACACACACAACACTACCCTAATCTAACCTGTCCAACCTGTCTCCAACTTACCCTCCATTACCTTA  
CCTCCCCA

CTAGCTCTTCTGTTGCACCATCCTCAAGTGAAGTTGTCAGCTCTTCCGTTGCACCATCCTCAAGTGAAGTT  
GTCAGCTCTTCCGTTGCACCATCCTCAAGTGAAGTTGTCAGCTCTTCCGTTGCTTCATCCTCAAGTGAAGT  
TGCCAGCT

CATCATGCCGTGCTGTTGGTACTGTCCATTCTGTGGAGGTGGTACTGAAGCAGGTTGAGGAGAGACATGAT  
GATGGTTCTCTGGAACAGCTGATGTCCCAGGTGTTGTCTCTTGGTTGAGAATTAACCTTAGTGGAATCTCTA  
TCAAATTC

CTGTTGACGAATTAATTACTGAAGGTAACGAAAAGTTGGCTGCTGTTCCAGCTGCTGGTCCAGCTTCTGCT  
GGCGGTGCTGCTGCTGCCTCTGGTGATGCTGCTGCTGAAGAAGAAAAGGAAGAAGAAGCCGCTGAAGAATC  
TGACGACG

GCTTCATCCACTAGCTCTTCTGTTGCACCATCCTCAAGTGAAGTTGTCAGCTCTTCCGTTGCACCATCCTC  
AAGTGAAGTTGTCAGCTCTTCCGTTGCACCATCCTCAAGTGAAGTTGTCAGCTCTTCCGTTGCTTCATCCT  
CAAGTGAA

AAGCACAGGCACAGGCACAGGCACAAGCCCAGGCGCAGGCCCAAGCCCAAGCCCAAGCACCAAGCACCAAGCA  
CACGCTCAGCACCAGCCCTCCCAACAACCACAACAAGCTCAGCAACAACCTAACCCACTACATGGGTTGAC  
ACCTACTG

TGTTGCACCATCCTCAAGTGAAGTTGTCAGCTCTTCCGTTGCACCATCCTCAAGTGAAGTTGTCAGCTCTT  
CCGTTGCACCATCCTCAAGTGAAGTTGTCAGCTCTTCCGTTGCTTCATCCTCAAGTGAAGTTGCCAGCTCC  
TCTGTTGC

CTCTTCTATTGCTTCATCCACTAGCTCTTCTGTTGCACCATCCTCAAGTGAAGTTGTCAGCTCTTCCGTTG  
CACCATCCTCAAGTGAAGTTGTCAGCTCTTCCGTTGCACCATCCTCAAGTGAAGTTGTCAGCTCTTCCGTT  
GCTTCATC

TCAGCTCTTCCGTTGCTTCATCCTCAAGTGAAGTTGCCAGCTCCTCTGTTGCGCCATCCTCAAGTGAAGTT  
GTCAGCTCTTCCGTTGCACCATCCTCAAGTGAAGTTGTCAGCTCTTCCGTTGCTTCATCCTCAAGTGAAGT  
TGCCAGCT

AAGCGCAAGCACCAAGCACCAAGCACCAAGCACAGGCACAGGCACAGGCACAAGCCCAGGCGCAGGCC  
CAAGCCCAAGCCCAAGCACCAAGCACCAAGCACAGCTCAGCACCAGCCCTCCCAACAACCACAACAAGCTCA  
GCAACAAC

GAAGGTAAGTCTGTTGACGAATTAATTACTGAAGGTAACGAAAAGTTGGCTGCTGTTCCAGCTGCTGGTCC  
AGCTTCTGCTGGCGGTGCTGCTGCTGCCTCTGGTGATGCTGCTGCTGAAGAAGAAAAGGAAGAAGAAGCCG  
CTGAAGAA

CCTCAAACCTGTAAGCGGTACCATAACATGACGTAATCATAATCATCTGCAAGGGATCTGTCACCAGCCTGT  
GGAGGTCTCCAGCTTCTTGTGCGAGAAGAGTCGTTAGCTGGGGTGTCTTCGAGGTTTAAAGAGGATGCAAT  
AGTCACTG

AGTGAAGTTGTCAGCTCTTCCGTTGCTTCATCCTCAAGTGAAGTTGCCAGCTCCTCTGTTGCGCCATCCTC  
AAGTGAAGTTGTCAGCTCTTCCGTTGCACCATCCTCAAGTGAAGTTGTCAGCTCTTCCGTTGCTTCATCCT  
CAAGTGAA

GCCATCCTCAAGTGAAGTTGTCAGCTCTTCCGTTGCTTCATCCTCAAGTGAAGTTGCCAGCTCCTCTGTTG  
CGCCATCCTCAAGTGAAGTTGTCAGCTCTTCCGTTGCACCATCCTCAAGTGAAGTTGTCAGCTCTTCCGTT  
GCTTCATC

CCAGTTAGAAGCCATAGCTTTGTTTGGGGTCATCATGCCGTGCTGTTGGTACTGTCCATTCTGTGGAGGTG  
GTAAGTGAAGCAGGTTGAGGAGAGACATGATGATGGTTCTCTGGAACAGCTGATGTCCCAGGTGTTGTCTCT  
TGTTGAGA

TCTTCAAGTGAAGTTGCTAGCTCTTCTATTGCTTCATCCACTAGCTCTTCTGTTGCACCATCCTCAAGTGA  
AGTTGTCAGCTCTTCCGTTGCACCATCCTCAAGTGAAGTTGTCAGCTCTTCCGTTGCACCATCCTCAAGTGA  
AAGTTGTC



GAACCGAAGAAGCGGAGCCTGATTCTGTGGCAGAAGATGAACCGGAGACTGATGAGCCTGATTCTGTGGCA  
GAAGATGAACCGGAGACTGATGAGCCTGATTCTGTGGCAGAAGATGAACCGGAGGCGGATGAGCCTGATTC  
AGTGGCAG

ACGACGAGTGCTGCACCACCTCCGCCACCAGCATTCTAACTCAACAACCTCAATCTGGAGGAGCTCCAGC  
TCCACCCACCTCCTCAAATGCCAGCTACATCAACATCCGGAGGCGGTTTCATTTCGCTGAAACTACTGGAG  
ATGCAGGT

ACAAGCACAAGCACAAGCACAAGCACAAGCACAGGCACAGGCACAGGCACAAGCCCAGGCGCAGGCCAAGCCCAAG  
CCCAAGCACAAGCACAAGCACACGCTCAGCACCAGCCCTCCCAACAACCACAACAAGCTCAGCAACAACCT  
AACCCACT

GCACAAGCACAAGCACAGGCACAGGCACAGGCACAAGCCCAGGCGCAGGCCAAGCCCAAGCCCAAGCACA  
AGCACAAGCACACGCTCAGCACCAGCCCTCCCAACAACCACAACAAGCTCAGCAACAACCTAACCCACTAC  
ATGGGTTG

CTCTTCCGTTGCACCATCCTCAAGTGAAGTTGTCAGCTCTTCCGTTGCACCATCCTCAAGTGAAGTTGTCA  
GCTCTTCCGTTGCTTCATCCTCAAGTGAAGTTGCCAGCTCCTCTGTTGCGCCATCCTCAAGTGAAGTTGTC  
AGCTCTTC

GGTTTAGTCGGTATCGATCAATTCTTGTGAAGACTGGTACTTTGACCACCAGTGAAACTGCTCACAACAT  
GAAGGTCATGAAATTCTCTGTCTCTCCAGTTGTGCAAGTCGCTGTGCAAGTCAAGAACGCTAACGACTTAC  
CAAATTG

CAAGTGAAGTTGTCAGCTCTTCCGTTGCACCATCCTCAAGTGAAGTTGTCAGCTCTTCCGTTGCTTCATCC  
TCAAGTGAAGTTGCCAGCTCCTCTGTTGCGCCATCCTCAAGTGAAGTTGTCAGCTCTTCCGTTGCTTCATC  
CTCAAGTG

CAAGTGAAGTTGTCAGCTCTTCCGTTGCACCATCCTCAAGTGAAGTTGTCAGCTCTTCCGTTGCTTCATCC  
TCAAGTGAAGTTGCCAGCTCCTCTGTTGCGCCATCCTCAAGTGAAGTTGTCAGCTCTTCCGTTGCTTCATCC  
TACAAGCG

TGGAACCACGAGGAACAATAAGTCGATGTACTCATCTTGATCCAACAAGTCGGAAACATCCTGTCTGGTT  
TCGATCAATTGCACAGAGCCCACAGGAACACCAGTCTCACTTTGGAATTGTGCAATGGTGTGTTAACGAT  
CTTTGCCA

TCCGTTGCACCATCCTCAAGTGAAGTTGTCAGCTCTTCCGTTGCTTCATCCTCAAGTGAAGTTGCCAGCTC  
CTCTGTTGCGCCATCCTCAAGTGAAGTTGTCAGCTCTTCCGTTGCTTCATCCTCAAGTGAAGTTGCCAGCT  
CCTCTGTT

CACACACACACACACCACACCCACACACACCCACACACCACACCACACCACACCACACCACACCACACCACACACAC  
ACAACACTACCCTAATCTAACCTGTCCAACCTGTCTCCAACTTACCCTCCATTACCTTACCCTCCCACT  
CGTTACCC

GCACCATCCTCAAGTGAAGTTGTCAGCTCTTCCGTTGCACCATCCTCAAGTGAAGTTGTCAGCTCTTCCGT  
TGCTTCATCCTCAAGTGAAGTTGCCAGCTCCTCTGTTGCGCCATCCTCAAGTGAAGTTGTCAGCTCTTCCG  
TTGCTTCA

TCCGTTGCACCATCCTCAAGTGAAGTTGTCAGCTCTTCCGTTGCTTCATCCTCAAGTGAAGTTGCCAGCTC  
CTCTGTTGCGCCATCCTCAAGTGAAGTTGTCAGCTCTTCCGTTGCTTCTTCTACAAGCGAAGCTACTAGTT  
CTTCTGCT

GATGAGCTAGGAACCGAAGAAGCGGAGCCTGATTCTGTGGCAGAAGATGAACCGGAGACTGATGAGCCTGA  
TTCTGTGGCAGAAGATGAACCGGAGACTGATGAGCCTGATTCTGTGGCAGAAGATGAACCGGAGGCGGATG  
AGCCTGAT

ACTAAGGCATTGGAACCACGAGGAACAACCTAAGTCGATGTACTCATCTTGATCCAACAAGTCGGAAACATC  
CTGTCTGGTTTTGATCAATTGCACAGAGCCCACAGGAACACCAGTCTCACTTTGGAATTGTGCAATGGTGT  
CGTTAACG

TGTCAGCTCTTCCGTTGCACCATCCTCAAGTGAAGTTGTGAGCTCTTCCGTTGCTTCATCCTCAAGTGAAG  
TTGCCAGCTCCTCTGTTGCGCCATCCTCAAGTGAAGTTGTGAGCTCTTCCGTTGCTTCATCCTCAAGTGAAG  
GTTGCCAG

TCCTCAAGTGAAGTTGTGAGCTCTTCCGTTGCACCATCCTCAAGTGAAGTTGTGAGCTCTTCCGTTGCACC  
ATCCTCAAGTGAAGTTGTGAGCTCTTCCGTTGCTTCATCCTCAAGTGAAGTTGCCAGCTCCTCTGTTGCGC  
CATCCTCA

AGCTCTTCCGTTGCTTCATCCTCAAGTGAAGTTGCCAGCTCCTCTGTTGCGCCATCCTCAAGTGAAGTTGT  
CAGCTCTTCCGTTGCTTCATCCTCAAGTGAAGTTGCCAGCTCCTCTGTTGCGCCATCCTCAAGTGAAGTTG  
TCAGCTCT

TGCTGCCACATCTTCAAGTGAAGTTGTAGCTCTTCTATTGCTTCATCCACTAGCTCTTCTGTTGCACCAT  
CCTCAAGTGAAGTTGTGAGCTCTTCCGTTGCACCATCCTCAAGTGAAGTTGTGAGCTCTTCCGTTGCACCA  
TCCTCAAG

TGTCAGCTCTTCCGTTGCACCATCCTCAAGTGAAGTTGTGAGCTCTTCCGTTGCTTCATCCTCAAGTGAAG  
TTGCCAGCTCCTCTGTTGCGCCATCCTCAAGTGAAGTTGTGAGCTCTTCCGTTGCTTCTTCTACAAGCGAA  
GCTACTAG

CTGATTCTGTGACAGAACCGGATGAGCTAGGAACCGAAGAAGCGGAGCCTGATTCTGTGGCAGAAGATGAA  
CCGGAGACTGATGAGCCTGATTCTGTGGCAGAAGATGAACCGGAGACTGATGAGCCTGATTCTGTGGCAGA  
AGATGAAC

AAGTTGTGAGCTCTTCCGTTGCACCATCCTCAAGTGAAGTTGTGAGCTCTTCCGTTGCACCATCCTCAAGT  
GAAGTTGTGAGCTCTTCCGTTGCTTCATCCTCAAGTGAAGTTGCCAGCTCCTCTGTTGCGCCATCCTCAAG  
TGAAGTTG

GCCGACTCTTCAAGTCTTCCGTTGCACCATCCTCAAGTGAAGTTGTGAGCTCTTCCGTTGCACCATCCTCAAGT  
CCCAAATGCATGCACAGGCACAAGCTCAGGCTCAGGCACAGGCACAGGTGGAACAACAGAAGCAGCAACAG  
CAATTCTT

CTCCTCTGTTGCGCCATCCTCAAGTGAAGTTGTGAGCTCTTCCGTTGCACCATCCTCAAGTGAAGTTGTCA  
GCTCTTCCGTTGCTTCATCCTCAAGTGAAGTTGCCAGCTCCTCTGTTGCGCCATCCTCAAGTGAAGTTGTCA  
AGCTCTTC

CTCAAGTGAAGTTGCCAGCTCCTCTGTTGCGCCATCCTCAAGTGAAGTTGTGAGCTCTTCCGTTGCTTCAT  
CCTCAAGTGAAGTTGCCAGCTCCTCTGTTGCGCCATCCTCAAGTGAAGTTGTGAGCTCTTCCGTTGCACCA  
TCCTCAAG

CGTTGCTTCATCCTCAAGTGAAGTTGCCAGCTCCTCTGTTGCGCCATCCTCAAGTGAAGTTGTGAGCTCTT  
CCGTTGCACCATCCTCAAGTGAAGTTGTGAGCTCTTCCGTTGCTTCATCCTCAAGTGAAGTTGCCAGCTCC  
TCTGTTGC

TGCAACAGTCACTACAGCAAATGCAGCATTACAGCAATTGAAAATGCAGCAGCAACAACAACAGCAGCAA  
CAACAACAGCAGCAACAACAACAGCAGCAACAACAACAGCAACAGCACATATATCCCTCCTCGACTCCTGG  
TGTGGCTA

GTTGCCAGCTCCTCTGTTGCGCCATCCTCAAGTGAAGTTGTGAGCTCTTCCGTTGCTTCATCCTCAAGTGA  
AGTTGCCAGCTCCTCTGTTGCGCCATCCTCAAGTGAAGTTGTGAGCTCTTCCGTTGCACCATCCTCAAGTGA  
AAGTTGTC

TGGGCCTCCTGTTT CAGGATCCACTCTAGAAAGGCTCCTCTTCATGATGTTCTTCCGTTTCTGTGGTTGTTCT  
TGGTTGTTGTTTCGTGTGACTGTTGGGTGTGATTGTGCGCCGGACGTTTCCCCCAATCCTGCTAATAAAGGGT  
CCTGTTCT

GACAGAACCGGATGAGCTAGGAACCGAAGAAGCGGAGCCTGATTCTGTGGCAGAAGATGAACCGGAGACTG  
ATGAGCCTGATTCTGTGGCAGAAGATGAACCGGAGACTGATGAGCCTGATTCTGTGGCAGAAGATGAACCG  
GAGGCGGA

ACGTAACCAGTAATACCCTGAATTCTGCCGGTGGAAATAGCCTCCTTCCACAGGCCACTGGAAGAAGAGGG  
CCAGCACCACCACCTCCTCCAAGAGCATCTCGCCCCACACCAAACGTTACGATGCAACAAAATCCACAACA  
GTACAATA

ACCGGAGACTGATGAGCCTGATTCTGTGGCAGAAGATGAACCGGAGACTGATGAGCCTGATTCTGTGGCAG  
AAGATGAACCGGAGGCGGATGAGCCTGATTCACTGGCAGAAGATGAACCGGAGGCGGATGAGCCTGATTCA  
GTGGCAGA

CATCCTCAAGTGAAGTTGTGACTCTTCCGTTGCTTCATCCTCAAGTGAAGTTGCCAGCTCCTCTGTTGCG  
CCATCCTCAAGTGAAGTTGTGACTCTTCCGTTGCTTCATCCTCAAGTGAAGTTGCCAGCTCCTCTGTTGCG  
GCCATCCT

GAGACTGAAGAGCCTGATGAAGTAATAGAGCTCGAGACTTCAGAGGACGAGGTTGATGGAGCAATGGAGCT  
CGAGACTTCGGTGGAGGATGACGTTAACTCAGTGAGAGAGCTCGAGACATCAGAAGTAGATGAGGTCAACT  
CAATAGAA

AGCGGAGCCTGATTCTGTGGCAGAAGATGAACCGGAGACTGATGAGCCTGATTCTGTGGCAGAAGATGAAC  
CGGAGACTGATGAGCCTGATTCTGTGGCAGAAGATGAACCGGAGGCGGATGAGCCTGATTCACTGGCAGAA  
GATGAACC

CAAGCGGCGCAAGCGCAAGCACAAGCACAAGCACAAGCACAAGCACAGGCACAGGCACAGGCACAAGCCCA  
GGCGCAGGCCCAAGCCCAAGCCCAAGCACAAGCACAAGCACACGCTCAGCACCAGCCCTCCCAACAACCAC  
ACAAGCT

CCTCTGTTGCGCCATCCTCAAGTGAAGTTGTGACTCTTCCGTTGCTTCATCCTCAAGTGAAGTTGCCAGC  
TCCTCTGTTGCGCCATCCTCAAGTGAAGTTGTGACTCTTCCGTTGCACCATCCTCAAGTGAAGTTGTGAG  
CTCTTCCG

GCGCCATCCTCAAGTGAAGTTGTGACTCTTCCGTTGCACCATCCTCAAGTGAAGTTGTGACTCTTCCGT  
TGCTTCATCCTCAAGTGAAGTTGCCAGCTCCTCTGTTGCGCCATCCTCAAGTGAAGTTGTGACTCTTCCG  
TTGCTTCT

GTTT CAGGATCCACTCTAGAAAGGCTCCTCTTCATGATGTTCTTCCGTTTCTGTGGTTGTTCTGGTTGTTGT  
TCGTGTGACTGTTGGGTGTGATTGTGCGCCGGACGTTTCCCCCAATCCTGCTAATAAAGGGTCTGTTCTTC  
ACTCATT

GAGGATGAGCCTGATTCTGTGACAGAACCGGATGAGCTAGGAACCGAAGAAGCGGAGCCTGATTCTGTGGC  
AGAAGATGAACCGGAGACTGATGAGCCTGATTCTGTGGCAGAAGATGAACCGGAGACTGATGAGCCTGATT  
CTGTGGCA

GGAGCTCTGACAGCTAATTGATCCAAAGTGATACATTACCACCAGCCTTAACAATCTTGGCTCTGGCACC  
AGCAGTGAATCTCAAAGCAGCAACAGTGGTCTTTGGGAATTCAAAGATTCTGGCATCGTCAGTAACAGTAC  
CAACAACG

GTATCGATCAATTCTTGTGAAGACTGGTACTTTGACCACCAGTGAAACTGCTCACAACATGAAGGTCATG  
AAATTCTCTGTCTCTCCAGTTGTGCAAGTCGCTGTGCAAGTCAAGAACGCTAACGACTTACCAAAATTGGT  
CGAAGGTT

CAGAAGAGGTAGCAGCTTCTGAGCTGGTAGAAGTACTACTTGGAGACCAGGTGTTGCTGCTGCCTTACCA  
GTCCAGACAAAAGTAGCATCTTGGGTGACAGTCTTAGTGTAGACGTGACCGTTCTTGGTGGCAGTGATAGT  
GGTAGTGA

GTGTTCTCTAAGTTTATATCGTTGACAATGGTGCCTGTCTGCTTGGCCAACTGAGTGGCCTTACCATCAG  
TTCCACCTCCTCTCTGTTCTGTGTGTCCACTTGATTTTGTAGATGTGATATGTACTCTACCGCCTGTGTGA  
GAATTTGG

TCCTCAAGTGAAGTTGCCAGCTCCTCTGTTGCGCCATCCTCAAGTGAAGTTGTCAGCTCTTCCGTTGCACC  
ATCCTCAAGTGAAGTTGTCAGCTCTTCCGTTGCTTCATCCTCAAGTGAAGTTGCCAGCTCCTCTGTTGCGC  
CATCCTCA

GTTGCTCCTTACAACCTCAACCATTGCTAGCTCTTCTTCCACTGCCAGACTTCTATCTCGACCATTGCTCC  
TTACAACCTCCACAACCACCACCACCCAGCTAGTTCTGCTTCCAGCGTTATTATCTCAACCAGAAACGGTA  
CCACTGTT

GATGAGCCTGATTCTGTGGCAGAAGATGAACCGGAGACTGATGAGCCTGATTCTGTGGCAGAAGATGAACC  
GGAGGCGGATGAGCCTGATTCAGTGGCAGAAGATGAACCGGAGGCGGATGAGCCTGATTCAGTGGCAGAAG  
TTGAACCG

AAGTTGCCAGCTCCTCTGTTGCGCCATCCTCAAGTGAAGTTGTCAGCTCTTCCGTTGCACCATCCTCAAGT  
GAAGTTGTCAGCTCTTCCGTTGCTTCATCCTCAAGTGAAGTTGCCAGCTCCTCTGTTGCGCCATCCTCAAG  
TGAAGTTG

CCATCATTGACTTCTGCTTCCAAGACTTATTATTCAAATCTTGTGTGGGTGCTCGGATGGGTGATTAGA  
ATTGGATGGAGACAAGAGTGGAGACGATTATCAGCTTGGTCAGCAGCTTTGTGCTCCTTGTGAGAGCTAG  
TGTACAAA

TTGCTTCATCCTCAAGTGAAGTTGCCAGCTCCTCTGTTGCGCCATCCTCAAGTGAAGTTGTCAGCTCTTCC  
GTTGCTTCATCCTCAAGTGAAGTTGCCAGCTCCTCTGTTGCGCCATCCTCAAGTGAAGTTGTCAGCTCTTCC  
CGTTGCAC

GTGGTTGAAGCAGAAGAGGTAGCAGCTTCTGAGCTGGTAGAAGTACTACTTGGAGACCAGGTGTTGCTGCT  
GCCTTACCAGTCCAGACAAAAGTAGCATCTTGGGTGACAGTCTTAGTGTAGACGTGACCGTTCTTGGTGG  
CAGTGATA

AAGCTCAAGCACAGGCGGCACAAGCGGCGCAAGCGCAAGCACAAGCACAAGCACAAGCACAAGCACAGGCA  
CAGGCACAGGCACAAGCCCAGGCGCAGGCCAAGCCCAAGCCCAAGCACAAGCACAAGCACACGCTCAGCA  
CCAGCCCT

TGAAGTTGTCAGCTCTTCCGTTGCTTCATCCTCAAGTGAAGTTGCCAGCTCCTCTGTTGCGCCATCCTCAA  
GTGAAGTTGTCAGCTCTTCCGTTGCTTCATCCTCAAGTGAAGTTGCCAGCTCCTCTGTTGCGCCATCCTCA  
AGTGAAGT

TAGCTCAAGCGTTGCTCCTTACAACCTCAACCATTGCTAGCTCTTCTTCCACTGCCAGACTTCTATCTCGA  
CCATTGCTCCTTACAACCTCCACAACCACCACCACCCAGCTAGTTCTGCTTCCAGCGTTATTATCTCAACC  
AGAAACGG

GATACCACCCACCAAAGGACATGTGGAAATTGATCGTCGATCCAATGGATGCTCCGGACCAACCACAAGA  
TTTGACCATTGACTTTGAACGTGGTCTTCCAGTCAAGTTGACCTACACCGACAACAAGACTTCCAAGGAAG  
TTTCCGTT

CACCAAAGGACATGTGGAAATTGATCGTCGATCCAATGGATGCTCCGGACCAACCACAAGATTTGACCATT  
GACTTTGAACGTGGTCTTCCAGTCAAGTTGACCTACACCGACAACAAGACTTCCAAGGAAGTTTCCGTTAC  
CAAGCCTT

CAGCTAATTGATCCAAAGTGATACATTACCACCAGCCTTAACAATCTTGGCTCTGGCACCAGCAGTGAAT  
CTCAAAGCAGCAACAGTGGTCTTTGGGAATTCAAAGATTCTGGCATCGTCAGTAACAGTACCAACAACGAC  
AACAGTCT

AGATGAGCCGGAGACTGAAGAGCCTGATGAAGTAATAGAGCTCGAGACTTCAGAGGACGAGGTTGATGGAG  
CAATGGAGCTCGAGACTTCGGTGGAGGATGACGTTAACTCAGTGAGAGAGCTCGAGACATCAGAAGTAGAT  
GAGGTCAA

CAGAAGATGAACCGGAGACTGATGAGCCTGATTCTGTGGCAGAAGATGAACCGGAGACTGATGAGCCTGAT  
TCTGTGGCAGAAGATGAACCGGAGGCGGATGAGCCTGATTTCAGTGGCAGAAGATGAACCGGAGGCGGATGA  
GCCTGATT

AGAAATCTTTGCCGGACTCTTCAGCTTCTGCCAATCAGCAGGTGCAACATGCTCAGCAACATGCTCAACAA  
CAACATGAGGCCCAAATGCATGCACAGGCACAAGCTCAGGCTCAGGCACAGGCACAGGTGGAACAACAGAA  
GCAGCAAC

ATTAATTACTGAAGGTAACGAAAAGTTGGCTGCTGTTCCAGCTGCTGGTCCAGCTTCTGCTGGCGGTGCTG  
CTGCTGCCTCTGGTGTGCTGCTGCTGAAGAAGAAAAGGAAGAAGAAGCCGCTGAAGAATCTGACGACGAC  
ATGGGTTT

CCTCCGCTGTTTTCTCTTCGACCGAGTCTGTTAGCTCTTCCTCTGTTCAGTTCTTCCTCAGCCGTTTTCTCT  
TCTGAAGCTGTTCAGTTCTCTCCAGTTTTCTCAGTTGTTTTCATCTTCGGCCGGACCTGCTAGCTCAAGCGT  
TGCTCCTT

CCCCTTTGGATATCAGACAAATAGCAACATGTCATCTCCACCCCTCCTCCAGTGACAACCTTTCAATACCC  
TGACACCACAAATGACTGCAGCAACTGGACAACCTGCAGTTCCCTTCCTCAGAATACTCAAGCACCTTCG  
CAAGCCAC

AGCCTGATGAAGTAATAGAGCTCGAGACTTCAGAGGACGAGGTTGATGGAGCAATGGAGCTCGAGACTTCG  
GTGGAGGATGACGTTAACTCAGTGAGAGAGCTCGAGACATCAGAAGTAGATGAGGTCAACTCAATAGAAT  
ACTGATGG

CATCCTCAAGTGAAGTTGTTCAGCTCTTCCGTTGCTTCATCCTCAAGTGAAGTTGCCAGCTCCTCTGTTGCG  
CCATCCTCAAGTGAAGTTGTTCAGCTCTTCCGTTGCTTCTTCTACAAGCGAAGCTACTAGTTCTTCTGCTGT  
CACATCTT

CTGCACCACCTCCGCCACCAGCATTCTAACTCAACAACCTCAATCTGGAGGAGCTCCAGCTCCACCCCCA  
CCTCCTCAAATGCCAGCTACATCAACATCCGGAGGCGGTTTCATTTCGCTGAAACTACTGGAGATGCAGGTGC  
TGATGCAC

GATTCTGTGGCAGAAGATGAACCGGAGACTGATGAGCCTGATTCTGTGGCAGAAGATGAACCGGAGACTGA  
TGAGCCTGATTCTGTGGCAGAAGATGAACCGGAGGCGGATGAGCCTGATTTCAGTGGCAGAAGATGAACCGG  
AGGCGGAT

GACAAATCGCAGCTAGATAAGCCCTCAGTTTTACTGCAGGAAGCACGTGGAGAATCTGCTTCACCACCAGC  
AGCGGCTGGAAATGGAGGCACACCTGGTGGACCTCCGGCTTCTTTAGCAGATGCGTTGGCAGCAGCTTTAA  
ACAAAAGA

ACAGGCACAGGCACAAGCCCAGGCGCAGGCCCAAGCCCAAGCCCAAGCACAAGCACAAGCACACGCTCAGC  
ACCAGCCCTCCCAACAACCACAACAAGCTCAGCAACAACCTAACCCACTACATGGGTTGACACCTACTGCA  
AAGGATGT

GAAGATTTCAAGAAATCTTTGCCGGACTCTTCAGCTTCTGCCAATCAGCAGGTGCAACATGCTCAGCAACA  
TGCTCAACAACAACATGAGGCCCAAATGCATGCACAGGCACAAGCTCAGGCTCAGGCACAGGCACAGGTGG  
AACAACAG



AAGTCGATGTACTCATCTTGATCCAACAAGTCGGAAACATCCTGTCTGGTTTCGATCAATTGCACAGAGCC  
CACAGGAACACCAGTCTCACTTTGGAATTGTGCAATGGTGTCTGTTAACGATCTTTGCCATTTCTCTGAACG  
TGTTACA

GTCACATCTTCCCTCCGCTGTTTCCTCTTCGACCGAGTCTGTTAGCTCTTCCCTCTGTCAGTTCTTCCCTCAGC  
CGTTTCCTCTTCTGAAGCTGTCTAGTTCCCTCTCCAGTTTCCTCAGTTGTTTCATCTTCGGCCGGACCTGCTA  
GCTCAAGC

CGTTCTTGGTGGCAGTGATAGTGGTAGTGATACTAGAACCAGAACCTTCATCAGCAGAAGAAGTCTCAGCA  
GCAGAAGAAGTCTCAGCAGCAGAAGTGGTAGCGGCAGCAGAAGTGGTAGCGGCAGCAGAGGTTTCGGCGGC  
AGAAGTTT

GGTATGACCACCATTGTCTAGAGATTTGGACAGACCAGGTTCTAAGTTCCACAAGCGTGAAGTTGTCTGAAGC  
TGTCACCGTTGTTGACACTCCACCAGTTGTCGTTGTTGGTGTGTCGGTTACGTCGAAACCCCAAGAGGTT  
TGAGATCT

CCACTGAAAGTACCAACTCCAGCACTAATGCTACTACCACTGCCAGCACCAACGTCAGGACTAGTGCTACT  
ACCACTGCCAGCATCAACGTCAGGACTAGTGCAGTACCCTGAAAGTACCAACTCCAACACTAGTGCTAC  
TACCACCG

GCTCAAGCACAAAGCTCAAGCACAGGCGGCACAAGCGGCGCAAGCGCAAGCACAAAGCACAAAGCACAAAGCAC  
AGCACAGGCACAGGCACAGGCACAAGCCCAGGCGCAGGCCCAAGCCCAAGCCCAAGCACAAAGCACAAAGCAC  
ACGCTCAG

TCTACAAGCGAAGCTACTAGTTCTTCTGCTGTCTCACATCTTCCCTCCGCTGTTTCCTCTTCGACCGAGTCTGT  
TAGCTCTTCCCTCTGTCTAGTTCTTCCCTCAGCCGTTTCCCTCTTCTGAAGCTGTCTAGTTCCCTCTCCAGTTTCCCT  
CAGTTGTT

ACTTCTGCTTCCAAGACTTATTATTCAAATCTTGCTGTGGGTGCTCGGATGGGTGATTAGAATTGGATGGA  
GACAAGAGTGGAGACGATTCATCAGCTTGGTCTAGCAGCTTTGTGCTCCTTGTGAGAGCTAGTGTACAAATG  
ATGCAAAT

CACTCTAGAAGGCTCCTCTTCATGATGTTCTTCCGTTTCCCTGTGGTTGTTCTGGTTGTTGTTTCGTGTGACT  
GTTGGGTGTGATTGTCTGCCGACGTTTCCCCAATCCTGCTAATAAAGGGTCTGTTCTTCACTCATTCTT  
AGTTATTA

GCACAAGCCCAGGCGCAGGCCCAAGCCCAAGCCCAAGCACAAAGCACACGCTCAGCACCAGCCCTC  
CCAACAACCACAACAAGCTCAGCAACAACCTAACCCACTACATGGGTTGACACCTACTGCAAAGGATGTCTG  
AAGTAATT

GATTGTGTGATAGATGATTGATGCTGATGAGGATGAGCCTGATTCTGTGACAGAACCGGATGAGCTAGG  
AACCGAAGAAGCGGAGCCTGATTCTGTGGCAGAAGATGAACCGGAGACTGATGAGCCTGATTCTGTGGCAG  
AAGATGAA

ATTCTAACCGCCCCTTTGGATATCAGACAAATAGCAACATGTCATCTCCACCCCTCCTCCAGTGACAACCT  
TTCAATACCCTGACACCACAAATGACTGCAGCAACTGGACAACCTGCAGTTCCCCTTCCCTCAGAATACTCA  
AGCACCTT

CCTCAAGTTCTGCTGCCACATCTTCAAGTGAAGTTGCTAGCTCTTCTATTGCTTCATCCACTAGCTCTTCT  
GTTGCACCATCCTCAAGTGAAGTTGTCAGCTCTTCCGTTGCACCATCCTCAAGTGAAGTTGTCAGCTCTTC  
CGTTGCAC

CCGGACCTGCTAGCTCAAGCGTTGCTCCTTACAACCTCAACCATTGCTAGCTCTTCTTCCACTGCCAGACT  
TCTATCTCGACATTGCTCCTTACAACCTCCACAACCACCACCACCCAGCTAGTTCTGCTTCCAGCGTTAT  
TATCTCAA

GTTCTTGTATGATCTGTAAGCACCGAACAGGTAACCAATTTACGACCACCAACACCGATATCACCAGCTG  
GCACGTCAAGTGTCTTGACCAATGTGTCTGCTCAATTCTCTCATGAAAGCATAACAGATTCTTCTGATTTTCG  
TTATTAGA

TAACATTATCGGTTTAGTCGGTATCGATCAATTCTTGGTTGAAGACTGGTACTTTGACCACCAGTGAAACTG  
CTCACAACATGAAGGTCATGAAATTCTCTGTCTCTCCAGTTGTGCAAGTCGCTGTGCAAGTCAAGAACGCT  
AACGACTT

CCAAGCCCAAGCCCAAGCACAAGCACAAGCACACGCTCAGCACCAGCCCTCCAACAACCACAACAAGCTC  
AGCAACAACCTAACCCACTACATGGGTTGACACCTACTGCAAAGGATGTGCAAGTAATTAAGCAATTGTCC  
TTGGATGC

CTTTACGTGTCACTGACGGTGCTTTGGTTGTGTCGTCGACACCATTGAAGGTGTCTGTGTCCAAACCGAAACT  
GTTTTGAGACAAGCTTTGGGTGAAAGAATCAAGCCTGTTGTTGTTATCAACAAGGTCGACAGAGCTTTGTT  
GGAATTGC

TTCTCTTCGACCGAGTCTGTTAGCTCTTCTCTGTCTCAGTTCTTCTCAGCCGTTTCTCTTCTGAAGCTG  
TCAGTTCTCTCCAGTTTCTCAGTTGTTTCATCTTCGGCCGGACCTGCTAGCTCAAGCGTTGCTCCTTAC  
AACTCAAC

ATTTCTTGATGAAACTCATGGATACGTGGTCCGTTTATTGTGAAAGGATCACTGGGTTGCCACTTTGAGTT  
TTCGTCAATCACAGGAGCGTCTGGTAGACCAGCAACCTTGGAGTACAAGCTTCCACATCAATTCTAAAGC  
CGTCTACA

AGAAGAATCTTGCCAAAGCCATCTAGAACATCTAGACAAGTCCAAAAGAGACCAAGATCCAGAACCTTGAC  
TGCTGTTTCATGACAAGATCTTGGAAGACTTAGTCTTCCCAACTGAAATCGTTGGTAAGAGAGTTAGATATT  
TGGTTGGT

CTCGAGACTTCAGAGGACGAGGTTGATGGAGCAATGGAGCTCGAGACTTCGGTGGAGGATGACGTTAACTC  
AGTGAGAGAGCTCGAGACATCAGAAGTAGATGAGGTCAACTCAATAGAACTACTGATGGAAACGGAACCTG  
ATGAAGTT

TGCTGGCGTAAGAGTCTTACCACCCCAACAAAAGTAGCATCTTGGGTGACAGTCTTAGTGTAGACATGA  
CCGTTCTTGGTGGCAGTGATGGTGGTGGTGATACTCTCAGCAAGAGCAGTAGCGGCAACAGCAGATAGAAC  
CAAAGCGG

AGCGGTACCAGATTGTGTGATAGATGATTAGATGCTGATGAGGATGAGCCTGATTCTGTGACAGAACCGG  
ATGAGCTAGGAACCGAAGAAGCGGAGCCTGATTCTGTGGCAGAAGATGAACCGGAGACTGATGAGCCTGAT  
TCTGTGGC

TTCCAGCGTTATTATCTCAACCAGAAACGGTACCCTGTTACTGAAACTGACAACACTCTTGTACCAAAG  
AAACCACTGTCTGTGACTACTCTTCAACATCTGCCGTTCCAGCTTCCACCACCGGTTACAACAATTCTACT  
AAGGTTTC

CATGTGGAAATTGATCGTCGATCCAATGGATGCTCCGGACCAACCACAAGATTTGACCATTGACTTTGAAC  
GTGGTCTTCCAGTCAAGTTGACCTACACCGACAACAAGACTTCCAAGGAAGTTTCCGTTACCAAGCCTTTG  
GATGTTTT

TTACAAGGCTGGTATGACCACCATTGTGTCAGAGATTTGGACAGACCAGGTTCTAAGTTCCACAAGCGTGAAG  
TTGTGCAAGCTGTACCGTTGTTGACACTCCACCAGTTGTGCTTGGTGGTGTGTCGGTTACGTCGAAACC  
CCAAGAGG

GATTGAGGAATTGAACTCGAGATACCTGGAGCAGAAGAAGCTGATGAACCGGAAACGGAGGAACCAGATTG  
TGTAACAGAACCGGACGTGCTGGAGGCTGATGAACCGGAAGCGGTACCAGATTGTGTGATAGATGATTACG  
ATGCTGAT



TGATTTACTAGAAGATTTCAAGAAATTCTTGCCGGACTCTTCAGCTTCTGCCAATCAGCAGGTGCAACATG  
CTCAGCAACATGCTCAACAACAACATGAGGCCAAATGCATGCACAGGCACAAGCTCAGGCTCAGGCACAG  
GCACAGGT

AGCAGCTTCTGAGCTGGTAGAAGTACTACTTGGAGACCAGGTGTTGCTGCTGCCTTACCAGTCCAGACAA  
AAGTAGCATCTTGGGTGACAGTCTTAGTGTAGACGTGACCGTTCTTGGTGGCAGTGATAGTGGTAGTGATA  
CTAGAACC

TCAGCTCTTCCGTTGCTTCTTCTACAAGCGAAGCTACTAGTTCTTCTGCTGTACATCTTCCCTCCGCTGTT  
TCCTCTTCGACCGAGTCTGTTAGCTCTTCTCTGTGAGTTCTTCTCAGCCGTTTCTCTTCTGAAGCTGT  
CAGTTCCT

CGTTGCTTCTTCTACAAGCGAAGCTACTAGTTCTTCTGCTGTACATCTTCCCTCCGCTGTTTCTCTTCGA  
CCGAGTCTGTTAGCTCTTCTCTGTGAGTTCTTCTCAGCCGTTTCTCTTCTGAAGCTGTGAGTTCTCT  
CCAGTTTC

TAGATGATTCAGATGCTGATGAGGATGAGCCTGATTCTGTGACAGAACCGGATGAGCTAGGAACCGAAGAA  
GCGGAGCCTGATTCTGTGGCAGAAGATGAACCGGAGACTGATGAGCCTGATTCTGTGGCAGAAGATGAACC  
GGAGACTG

CAATACCCAAGACTCTGTAACCCATAGCCTTGGCGTATTGAACAGCCAAAGAACCTAGACCACCAGCAGCA  
CCGGAGATAGCAACCCAGTGACCGGCCATCAAGTTAGCAGACTTCAAAGCCTTGTAGACGGTGATACCAGC  
ACACAAGA

AGACCAGGTTCTAAGTTCACACAAGCGTGAAGTTGTGGAAGCTGTCACCGTTGTTGACACTCCACCAGTTGT  
CGTTGTTGGTGTGTCGGTTACGTCGAAACCCCAAGAGGTTTGGAGATCTTTGACCACCGTCTGGGCTGAAC  
ATTTGTCT

GCAGCCTTGGTAGAGGAAGCGACGGTGGAAAGAGGTAGCCTCACTGGAAGAAGCGACAGCAGAAGAAGTAGC  
AGCAGAAGAAGAAGCTTCACTGGAAGAAGCGACGGCAGAAGAAGTAGCTTCACTGGAGGAAGCGACGGCAG  
AAGAAGTA

TCAAGGAAAGTATTGAATAATATTGTGGAAGAAACAAACGCACCTTCAAAGGCCAGTTGTTGAAGTTGTCAA  
GGAAGACAGAAGTGTTCCTGACCTAGCAGGTGTTGAGCAAGAGCAAGCAGAGAAATATTCTATTCAAACA  
ATAGTGGA

TCTTACGAGGCAGGTATCTTGGAAAGACCCAGATACCACCCACCAAAGGACATGTGGAAATTGATCGTCGA  
TCCAATGGATGCTCCGGACCAACCACAAGATTTGACCATTGACTTTGAACGTGGTCTTCCAGTCAAGTTGA  
CCTACACC

TTGCTTACTTCCCTCAAACCTTGAAGCGGTACCATACATGACGTAATCATAATCATCTGCAAGGGATCTGTC  
ACCAGCCTGTGGAGGTCTCCAGCTTCTTGTGCGAGAAGAGTCGTTAGCTGGGGTGTCTTCGAGGTTTTAAAG  
AGGATGCA

ATCATCTGTATTATAGATTTTCGTTACCGATAGTCTTTCCTTCAGAATCTTTCGGTCCTCTTCAATGTCAC  
TGACAACCTTCAGAAACCTTCACTCAGGTTGTGTCATCCTCTAAATTGGTTGTAATAAAAAGAACTAGGT  
ATTTGTGT

CTAAGAAATTGCCAAGAAAGACTCACAGAGGTCTAAGAAAGGTTGCTTGTATTGGTGCTTGGCATCCAGCC  
CACGTTATGTGGAGTGTGCCAGAGCTGGTCAAAGAGGTTACCATTCCAGAACCTCCATTAACCACAAGAT  
TTACAGAG

CCATTGTGAGAGATTTGGACAGACCAGGTTCTAAGTTCACACAAGCGTGAAGTTGTGGAAGCTGTCACCGTT  
GTTGACACTCCACCAGTTGTGCTTGGTGTGTCGGTTACGTCGAAACCCCAAGAGGTTTGGAGATCTTT  
GACCACCG

TGCTGTTGGTACTGTCCATTCTGTGGAGGTGGTACTGAAGCAGGTTGAGGAGAGACATGATGATGGTTCTC  
TGGAACAGCTGATGTCCCAGGTGTTGTCTCTTGTGTTGAGAATTAACCTTAGTGGAATCTCTATCAAATTCCG  
GTAAATTG

AAGCTCAAGCTCAGGCACAGGCTCAAGCACAAGCTCAAGCACAGGCGGCACAAGCGGGCGCAAGCGCAAGCA  
CAAGCACAAGCACAAGCACAAGCACAGGCACAGGCACAGGCACAAGCCCAGGCGCAGGCCCAAGCCCAAGC  
CCAAGCAC

TGAAGTTGTCAGCTCTTCCGTTGCTTCATCCTCAAGTGAAGTTGCCAGCTCCTCTGTTGCGCCATCCTCAA  
GTGAAGTTGTCAGCTCTTCCGTTGCTTCTTCTACAAGCGAAGCTACTAGTTCTTCTGCTGTCACATCTTCC  
TCCGCTGT

GATGGTTGTTGGTAATGTGCCAGTTAGAAGCCATAGCTTTGTTTGGGGTCATCATGCCGTGCTGTTGGTA  
CTGTCCATTCTGTGGAGGTGGTACTGAAGCAGGTTGAGGAGAGACATGATGATGGTTCTCTGGAACAGCTG  
ATGTCCCA

CGATGTCTAACATCACTATTAGTGCATCTTCATTATTATCTCAAACCTCAAACCTCAAACAACACAATTGCAA  
CAGCGGTTGAACTCAGCAGCTGCAGCCGCCCGCCGAGCTGCTTCACCATCGAATTCACCCCAACTGGATA  
CACAGCAG

GAACTTGTTCAATTTCTTGATGAAACTCATGGATACGTGGTCCGTTCAATTGTGAAAGGATCACTGGGTTGCC  
ACTTTGAGTTTTTCGTCAATCACAGGAGCGTCTGGTAGACCAGCAACCTTGAGGTACAAGCTTCCACATCA  
ATTCTAAA

GGAAGACCCAGATACCACCCACCAAAGGACATGTGGAAATTGATCGTCGATCCAATGGATGCTCCGGACC  
AACCACAAGATTTGACCATTGACTTTGAACGTGGTCTTCCAGTCAAGTTGACCTACACCGACAACAAGACT  
TCCAAGGA

CGATGAGGTTGATTGAGGAATTGAACTCGAGATACCTGGAGCAGAAGAAGCTGATGAACCGGAAACGGAGG  
AACCAGATTTGTGTAACAGAACCGGACGTGCTGGAGGCTGATGAACCGGAAGCGGTACCAGATTTGTGTGATA  
GATGATTC

ACCGAGTCTGTTAGCTCTTCTCTGTGAGTTCTTCTCAGCCGTTTCTCTTCTGAAGCTGTGAGTTCTC  
TCCAGTTTCTCAGTTGTTTCATCTTCGGCCGGACCTGCTAGCTCAAGCGTTGCTCCTTACAACCTCAACCA  
TTGCTAGC

AGTAATAGAGCTCGAGACTTCAGAGGACGAGGTTGATGGAGCAATGGAGCTCGAGACTTCGGTGGAGGATG  
ACGTTAACTCAGTGAGAGAGCTCGAGACATCAGAAGTAGATGAGGTCAACTCAATAGAACTACTGATGGAA  
ACGGAACC

TTCAAAGATTCTGGCATCGTCAGTAACAGTACCAACAACGACAACAGTCTTGTTAGCAGCACCTTCTTGCT  
TCAAAGCTCTAGCAATTCTAGAGACAGAAACAGGTGGTCTGTTGATCTTAGACAAGAACAAGCCTTCAAG  
ACAACCTT

CTAGAAAAAGTACTAATGAACATCACACCGTTTTATTGTTGGGAGAAGTGTTCATGATCATGGACAATTCA  
TCAGTTTTCAGCACCCAGTTCTTGACAACAACAACGGAGGCACCGACAACCTTTCTGGCGTTACCTTCAG  
GTCGATCT

GGTGGTTGCAGTGGTTGAAGCAGAAGAGGTAGCAGCTTCTGAGCTGGTAGAAGTACTACTTGGAGACCAGG  
TGTTGCTGCTGCCTTACCAGTCCAGACAAAAGTAGCATCTTGGGTGACAGTCTTAGTGTAGACGTGACCG  
TTCTTGGT

ACTACAGCAAATGCAGCATTTACAGCAATTGAAAATGCAGCAGCAACAACAACAGCAGCAACAACAACAGC  
AGCAACAACAACAGCAGCAACAACAACAGCAACAGCACATATATCCCTCCTCGACTCCTGGTGTGGCTAAT  
TATTCGGC

CGCATAACAAGGAATACAAAAGTTGGTAACGACATCGTCAGAGGTGTTTCCGGTGGTGAAAGGAAGCGTGTC  
TCCATTGCTGAAGTCTCCATCTGTGGATCCAAATTTCAATGCTGGGATAATGCTACAAGGGTTTTGGATTC  
CGCTACCG

TGTCAGCTCTGTTACCGACGTAAGAACCAACAATAGAGATGGACTTGACGACTTGGTTGAAGACATCAGAA  
CAACACTTGGCACCAGCTGGCATAACCGACCAAACGGTGGTACCGTTAGCTCTAACGTATCTGGTAGAAGC  
TTCAATAG

AGATGCTGATGAGGATGAGCCTGATTCTGTGACAGAACCGGATGAGCTAGGAACCGAAGAAGCGGAGCCTG  
ATTCTGTGGCAGAAGATGAACCGGAGACTGATGAGCCTGATTCTGTGGCAGAAGATGAACCGGAGACTGAT  
GAGCCTGA

AAAATGCTCCTGATTTACTAGAAGATTTCAAGAAATTTCTTGCCGGACTCTTCAGCTTCTGCCAATCAGCAG  
GTGCAACATGCTCAGCAACATGCTCAACAACAACATGAGGCCCAAATGCATGCACAGGCACAAGCTCAGGC  
TCAGGCAC

TCAGGCACAGGCTCAAGCACAAGCTCAAGCACAGGCGGCACAAGCGGCGCAAGCGCAAGCACAAGCACAAG  
CACAAGCACAAGCACAGGCACAGGCACAGGCACAAGCCCAGGCGCAGGCCCAAAGCCCAAGCCCAAGCACA  
GCACAAGC

GGTTAATTTCTCAAGAAGAGACAACACCTGGGACATCAGCTGTTCCAGAGAACCATCATCATGTCTCTCCTC  
AACCTGCTTCAGTACCACCTCCACAGAATGGACAGTACCAACAGCACGGCATGATGACCCCAAACAAGCT  
ATGGCTTC

AGGTAATACTACTCGCTTCTGTGTCATGCTCGAGTCCGCTTCATCTGTGAAAGATTAGCCACGCTTGAAGT  
AACAAACAGGAGGCAAGACGAGGGGTCTGGTGCCATACTGTTTCATCAAATTCAGTAAAGTCGAGTTGTGAGT  
TATCGCCC

CCTTCTTGGGTTACAAGGCTGGTATGACCACCATTGTCAGAGATTTGGACAGACCAGGTTCTAAGTTCCAC  
AAGCGTGAAGTTGTGCAAGCTGTACCGTTGTTGACACTCCACCAGTTGTCGTTGTTGGTGTTCGTTA  
CGTCGAAA

CAAGAAGAGACAACACCTGGGACATCAGCTGTTCCAGAGAACCATCATCATGTCTCTCCTCAACCTGCTTC  
AGTACCACCTCCACAGAATGGACAGTACCAACAGCACGGCATGATGACCCCAAACAAGCTATGGCTTCTA  
ACTGGGCA

ATGCTTACATATGTATCTTGCCTTGCTTAGATGATATCATATCCTGGGGTTCAAGACTCCACCGATCTCA  
ACAGTGTCCATCGAGATTGTTCCAGATGAATGGAGGAAGCAAGTTATTAACGAAGTCGTGATAGCCCACGG  
TAACCAAT

TGGATGGCACCGTTGCTTGGATGCAACCCCTGATTATATTCTTCTCGCACCAGGTGATTAGCTGAACCTGT  
GGCGGTTGGCTTCAAAGGTTCTAACGGAAGTTGCTGTGGAACAGTGGTGTATTACATTGCTAGTTGGTA  
GAGTATTG

GTACTTATATTGCTTTAGGAAGGTACTATACTACTCGCTTCTGTGTCATGCTCGAGTCCGCTTCATCTGTGAAA  
GATTCAGCCACGCTTGAAGTAAACAACAGGAGGCAAGACGAGGGGTCTGGTGCCATACTGTTTCATCAAATTC  
AGTAAAGT

TTCTTCTTGGATTTGCACCCTCCGCTGCGATGTGTACAGACGTTGCTTTCTTTTCGCTGGACTGTCTGGCC  
ACCTGGTTAGGTGGAGTTTGCTCCACATCCGACCTGAGACTACCCAACCTTTGGATCGCTGAATGTAACAGT  
TGGTATCC

AGGAACAACCTAAGTCGATGTACTCATCTTGATCCAACAAGTCGGAAACATCCTGTCTGGTTTTCGATCAATT  
GCACAGAGCCACAGGAACACCAGTCTCACTTTGGAATTGTGCAATGGTGTCTGTTAACGATCTTTGCCATT  
TCTCTGAA

TTTCCCAGAATCCAAAGTCGAGACCTACTATCAAGAATCCGCTGGTGTTCAGATCTGATCACCACCTGCT  
CAGGCGGTAGAAACGTCAAGGTTGCCACATACATGGCCAAGACCGGTAAGTCAGCCTTGGAAGCAGAAAAG  
GAATTGCT

GGTAATGTGCCAGTTAGAAGCCATAGCTTTGTTTTGGGGTCATCATGCCGTGCTGTTGGTACTGTCCATTC  
TGTGGAGGTGGTACTGAAGCAGGTTGAGGAGAGACATGATGATGGTTCTCTGGAACAGCTGATGTCCCAGG  
TGTTGTCT

GAGGTAGCCTCACTGGAAGAAGCGACAGCAGAAGAAGTAGCAGCAGAAGAAGAAGCTTCACTGGAAGAAGC  
GACGGCAGAAGAAGTAGCTTCACTGGAGGAAGCGACGGCAGAAGAAGTAGTTTTCACTGGAGGAAGCAACAG  
CGGAAGAA

TCTTTCAAGTTTCTTCTTGGATTTGCACCCTCCGCTGCGATGTGTACAGACGTTGCTTTCTTTTCGCTGGA  
CTGTCTGGCCACCTGGTTAGGTGGAGTTTGCTCCACATCCGACCTGAGACTACCCAACCTTTGGATCGCTGA  
ATGTAACA

ATCTTCTCCCCTGTTGCAGTCTCGCTTGTGCTTGTGTGCCTGTTGTGCCTGTTGCGCTTGTGCGCCTGT  
TGTGCTTGAATTGTGCCTGCTGCATCTGCGCCTGCTGGGGCATAGGAGAATTTATCTGCGAACCTGGCAT  
CACATTTG

TCCGCCACCAGCATTCTAACTCAACAACCTCAATCTGGAGGAGCTCCAGCTCCACCCCCACCTCCTCAAA  
TGCCAGCTACATCAACATCCGGAGGCGGTTCAATTCGCTGAAACTACTGGAGATGCAGGTCGTGATGCACTT  
TTAGCTTC

AAACGAATAAGTACTTATATTGCTTTAGGAAGGTACTATACTCGCTTCTGTGCATGCTCGAGTCCGCTTC  
ATCTGTGAAAGATTAGCCACGCTTGAAGTAACAACAGGAGGCAAGACGAGGGGTCTGGTGCCATACTGTT  
CATCAAAT

TCACCACCGTCAATACCCAAGACTCTGTAACCCATAGCCTTGGCGTATTGAACAGCCAAAGAACCTAGACC  
ACCAGCAGCACCAGGATAGCAACCCAGTGACCGGCCATCAAGTTAGCAGACTTCAAAGCCTTGTAGACGG  
TGATACCA

ACGCCATTGATGATGTAGTTGATGATGTAGTCGATGATGTAGTTGATGTTGTGGAGGACGTTGTTGAAGAA  
GTTGTGGAAGACGACGCAGAAGTAGACTCCGTACTTGAATCTGAGCTGCTTATGCTATTGCTATTTGTGTC  
AGAGTCAA

CACACACCACACCCACACACACCCACACACCACACCACACCCACACACCACCCACACACACACAACACTAC  
CCTAATCTAACCCTGTCCAACCTGTCTCCAACTTACCCTCCATTACCTTACCTCCCCACTCGTTACCCTG  
CCCCATTT

AGATTTGGACAGACCAGGTTCTAAGTTCCACAAGCGTGAAGTTGTCGAAGCTGTCACCGTTGTTGACACTC  
CACCAGTTGTCGTTGTTGGTGTGTCGGTTACGTGCAACCCCAAGAGGTTTGAGATCTTTGACCACCGTC  
TGGGCTGA

CATCACCGTCATCATCTGTATTATAGATTTTCGTTACCGATAGTCTTTCCCTTCAGAATTTCTTCGGTCCTCT  
TCAATGTCACTGACAACCTTCAGAAACCTCTTCACTCAGGTTGTGTCATCCTCTAAATTGGTTGTAATAAA  
AGAAGTAG

GAAGGTAAGGCCTTGTGGAAGGTTGTTATGAGAAAGTTCTTGCCAGCTGCCGATGCCTTATTGGAAATGAT  
TGTCTTGCACTTGCCATCTCCAGTCACTGCTCAAGCCTACAGAGCTGAACAATTATACGAAGGTCCAGCTG  
ACGATGCC

GCTAAGCGTAACTGGTGCAAGCCATAGGTAGCCTCACTACGGTACAGAGGTTACTTTGAAAGCAAGAACC  
TTCACATGTCACACCTGCACGCAGAGGCATGGAGAGGCCAGCACAAACCACCATGGATGGGTAAAGTCATA  
GAAGGAAA

CATCACTATTAGTGCATCTTCATTATTATCTCAAACCTCCAACCTCCAACAACACAATTGCAACAGCGGTTGA  
ACTCAGCAGCTGCAGCCGCCGCCGAGCTGCTTCACCATCGAATTCCACCCCAACTGGATACACAGCAGAG  
CAACAAAG

TATGTCACTCAATGACATGCTTGATCAGCAATCCTTTATGCTAGACACTGCGGGAACCAGGGCTCAGCCGC  
TCCAGCAACAACAGCAGCAGCAACAACAGCAACAGCAGGCGTTCGTTGCCTTCCCTTAATATTCAAACAGTT  
TCGTCTAC

TAATACCCTGAATTCTGCCGGTGGAAATAGCCTCCTTCCACAGGCCACTGGAAGAAGAGGGCCAGCACCAC  
CACCTCCTCCAAGAGCATCTCGCCCCACACCAAACGTTACGATGCAACAAAATCCACAACAGTACAATAAT  
TCTAACCG

ACTGGAAGAAGAAGCTCCAGAAGCATATCCATTCCCTTGCAAAACGTTTCGTTTCTGCGTGCCTGTCTTCTCC  
ACTTTTGTCTCGGTTCAGCCAACAGGCACGTGGTGGGTGTGCCTGGAGATTAGAAATTGTAGTTCCTCAGAT  
TATGTAAA

TGGTTGTTGCATATGTTAATGTTGTGGTATAAACAGATGGGGAGCCGGAAATCAAGGTGGAAGCCGTTGAA  
CCAGTCACGGAAGCACCGAATGAAGTGAAGCGGTTGAACCAGTTACGGAAGCACCGAATGAAGTGAACCC  
GGAAGTAG

AGTAAACATTGTCATGGGTAATCTTCTCCCCTGTTGCAGTCTCGCTTGTGCTTGTGCTTGTGCTTGTGCTT  
GTTGCGCTTGTGCGCTTGTGCTTGGAAATTGTGCTTGTGCTTGTGCTTGTGCTTGTGCTTGTGCTTGTGCTT  
TTTATCTG

AACAACAGCAACAAGCTCAAGCTCAAGCTCAAGCTCAAGCTCAAGCTCAGGCACAGGCTCAAGCACAAGCTCAAGCA  
CAGGCGGCACAAGCGGCGCAAGCGCAAGCACAAGCACAAGCACAAGCACAAGCACAAGCACAAGCACAAGCACAAGC  
ACAAGCCC

AATGACATGCTTGATCAGCAATCCTTTATGCTAGACACTGCGGGAACCAGGGCTCAGCCGCTCCAGCAACA  
ACAGCAGCAGCAACAACAGCAACAGCAGGCGTTCGTTGCCTTCCCTTAATATTCAAACAGTTTTCGTCTACAG  
CAGCTGGT

TTCAGTGGCGGAGGATGAACCGGAGGCGGATGAGCCTGATTTCAGTGGCAGAAGATGAACTGGAGACTGATG  
AGCCTGATGAAGTAATAGAAGATGAGCCGGAGACTGAAGAGCCTGATGAAGTAATAGAGCTCGAGACTTCA  
GAGGACGA

ACCGCCTCCACCACATAGGCACGTAACCAGTAATACCCTGAATTCTGCCGGTGGAAATAGCCTCCTTCCAC  
AGGCCACTGGAAGAAGAGGGCCAGCACCACCACCTCCTCCAAGAGCATCTCGCCCCACACCAAACGTTACG  
ATGCAACA

GTCATGGGTAATCTTCTCCCCTGTTGCAGTCTCGCTTGTGCTTGTGCTTGTGCTTGTGCTTGTGCTTGTGCTT  
TTGCGCCTGTTGTGCTTGGAAATTGTGCTTGTGCTTGTGCTTGTGCTTGTGCTTGTGCTTGTGCTTGTGCTT  
AACCTGGC

GCTCTAACTTCTTCTTGGGTTACAAGGCTGGTATGACCACCATTGTCAGAGATTTGGACAGACCAGGTTTC  
TAAGTTCCACAAGCGTGAAGTTGTCGAAGCTGTCACCGTTGTTGACACTCCACCAGTTGTCGTTGTTGGTG  
TTGTCGGT

ATGAACCGGAAGCGGTACCAGATTGTGTGATAGATGATTTCAGATGCTGATGAGGATGAGCCTGATTCTGTG  
ACAGAACCGGATGAGCTAGGAACCGAAGAAGCGGAGCCTGATTCTGTGGCAGAAGATGAACCGGAGACTGA  
TGAGCCTG

GTAAGCGGTACCATACATGACGTAATCATAATCATCTGCAAGGGATCTGTCACCAGCCTGTGGAGGTCTCC  
AGCTTCTTGTGCGAGAAGAGTCGTTAGCTGGGGTGTCTTCGAGGTTTAAAGAGGATGCAATAGTCACTGTCC  
AAAGAATC

GGCCTTGTTATGGGCCTCCTGTTCCAGGATCCACTCTAGAAGGCTCCTCTTCATGATGTTCTTCCGTTTCCT  
GTGGTTGTTCTGGTTGTTGTTTCGTGTGACTGTTGGGTGTGATTGTCGCCGGACGTTTCCCCCAATCCTGCT  
AATAAAGG

TGCCAAAGCCATCTAGAACATCTAGACAAGTCCAAAAGAGACCAAGATCCAGAACCTTGACTGCTGTTTCAT  
GACAAGATCTTGGAAGACTTAGTCTTCCCAACTGAAATCGTTGGTAAGAGAGTTAGATATTTGGTTGGTGG  
TAACAAGA

CCACCGAAAGTACCGACTCCAACACTAGTGCTACTACCACTGCTAGCACCAACTCCAGCACTAATGCCACT  
ACCACTGCTAGCACCAACTCCAGCACTAATGCCACTACCACTGAAAGTACCAACGCTAGTGCCAAGGAGGA  
CGCCAATA

TTAGCTCTTCTCTGTCAGTTCTTCCCTCAGCCGTTTCTCTTCTGAAGCTGTCAGTTCTCTCCAGTTTCC  
TCAGTTGTTTCATCTTCCGCCGGACCTGCTAGCTCAAGCGTTGCTCCTTACAACCTCAACCATTGCTAGCTC  
TTCTTCCA

ATACATTCACCACCAGCCTTAACAATCTTGGCTCTGGCACCAGCAGTGAATCTCAAAGCAGCAACAGTGGT  
CTTTGGGAATTCAAAGATTCTGGCATCGTCAGTAACAGTACCAACAACGACAACAGTCTTGTTAGCAGCAC  
CTTCTTGC

CACATCCCGCACTTGACAGTATTCCAAACTTTATACACAGTGGCAAGACTGAAGACACCAAGGAACCGAAT  
CAAGGGTGTGATAGGGACACATTTGCCAAACACATGACTGAAGTGGCAATGGCAACTTACGGACTGAGCC  
ACACTGCA

GAAACTCATGGATACGTGGTCCGTTTATTGTGAAAGGATCACTGGGTGGCACTTTGAGTTTTTCGTCAATC  
ACAGGAGCGTCTGGTAGACCAGCAACCTTGGAGTACAAGCTTCCACATCAATTCTAAAGCCGTCTACACC  
ATGGTCTA

AGTGCGATTACCACTGAAAGTACCAACTCCAGCACTAATGCTACTACCACTGCCAGCACCAACGTCAGGAC  
TAGTGCTACTACCACTGCCAGCATCAACGTCAGGACTAGTGCGACTACCACTGAAAGTACCAACTCCAACA  
CTAGTGCT

CTTCTGATGTTAAAGTGTGTGGTGGTAAGACATTATTTCTCACCTTTGTCTTAGCTTGAGGTACTTCAGAG  
TGTTGATCCTGTGAACCGATTGGATCAGGTGAGGAAGTACTCAGCGGTGGGATATACTGTGGCAGCGGATA  
GTGTGGGT

AAAATATGATCGATTATTTTGAAGCCATGGTGCTCATAAATGCCCTGCTGACGCCAACCCAGCTGAATG  
GATGCTAGAAGTTGTTGGTGCAGCTCCAGGCTCTCATGCAAATCAAGATTATTACGAAGTTTGGAGGAATT  
CTGAAGAG

GATAACTCTTTTCCAGAGGCGGTAGTGGCTGGGGTAGCGATTCCAAGTCTTCTGGCTGGGGTAACAGCGGTGG  
TTCAAACAACCTCTTCTTGGTGGTGATTTTCCAGACAACTAGGGTGAGGATTCTTCGTTTTTCTGCTCTAGCAT  
GTCTTATA

ATGCAGCATTTACAGCAATTGAAAATGCAGCAGCAACAACAACAGCAGCAACAACAACAGCAGCAACAACA  
ACAGCAGCAACAACAACAGCAACAGCACATATATCCCTCCTCGACTCCTGGTGTGGCTAATTATTTCGGCAA  
TGGCTAAT

ATATCAAAGAAGTATTTTAATTCGACGAAACTCATATTCTCCACACAGTGCAGGAAAGGTTTGGACTTGAC  
AAGACTCTTAAATCCTCGTCCGGAAGCGAACCTGTCTCCACTCAAATATCCAGATAGTGATTGACGTTAT  
CAATTGTA

CAAGCGTGAAGTTGTGGAAGCTGTCACCGTTGTTGACACTCCACCAGTTGTCGTTGTTGGTGTGTCGGTT  
ACGTCGAAACCCCAAGAGGTTTGGAGATCTTTGACCACCGTCTGGGCTGAACATTTGTCTGACGAAGTCAAG  
AGAAGATT

CCACCCCAAACAAAAGTAGCATCTTGGGTGACAGTCTTAGTGTAGACATGACCGTTCTTGGTGGCAGTGAT  
GGTGGTGGTGATACTCTCAGCAAGAGCAGTAGCGGCAACAGCAGATAGAACCAAAGCGGAAGAGAATTTCA  
TTTTAGGG

AAGTACTACTTGGAGACCAGGTGTTGCTGCTGCCTTACCAGTCCAGACAAAAGTAGCATCTTGGGTGACA  
GTCTTAGTGTAGACGTGACCGTTCTTGGTGGCAGTGATAGTGGTAGTGATACTAGAACCAGAACCTTCATC  
AGCAGAAG

CCAGTTGAGATTGCTGAAGCTGTTTTCAACTATGGTGACTTACCACCATGTTGACTGGTATTCCAGCTGA  
ACAAGTCACCAGAGTCATCACTGGTGTCCCATGGTACTCTACCAGATTGAGACCGGCTATCTCCAGTGCTC  
TATCTAAG

AGAAGAACAGCATAATATTGCTACCAAAGAAGCAGAATTGCTTGTAAAGAAAGAAGAGGAAAGGTGGAAGA  
AGCTTGCAGCCACTAGAGTTTCTGGTGGCCATCTGGAGAGAGACAATGTGGTTAGGGAAGAAGATAAATTG  
TGGACAGT

CAGGTATCTTGGAAAGACCCAGATACCACCCACCAAAGGACATGTGGAAATTGATCGTCGATCCAATGGAT  
GCTCCGGACCAACCACAAGATTTGACCATTGACTTTGAACGTGGTCTTCCAGTCAAGTTGACCTACCCGA  
CAACAAGA

GAGCCTGATGAAGTAATAGAAGATGAGCCGGAGACTGAAGAGCCTGATGAAGTAATAGAGCTCGAGACTTC  
AGAGGACGAGGTTGATGGAGCAATGGAGCTCGAGACTTCGGTGGAGGATGACGTTAACTCAGTGAGAGAGC  
TCGAGACA

GGAGACTGATGAGCCTGATGAAGTAATAGAAGATGAGCCGGAGACTGAAGAGCCTGATGAAGTAATAGAGC  
TCGAGACTTCAGAGGACGAGGTTGATGGAGCAATGGAGCTCGAGACTTCGGTGGAGGATGACGTTAACTCA  
GTGAGAGA

CCAATCCTGGACAGGGCGACTTCAGCGCTGGTGTCTCTAAGTTTATATCGTTGACAATGGTGCCTGTCTG  
CTTGGCCAACCTGAGTGGCCTTACCATCAGTTCCACCTCCTCTCTGTTCTGTGTGTCCACTTGATTTTGT  
GATGTGAT

GTCACTCAAGCCGTCGAATCATCTACATCCTCCTCATCCTCCTCCTCCTCCTCCTCCTCCTCCTCCTCCTC  
TTCTGGTGTCTGCTCCTGCTGCATTCCAAGGAGCAAGTGTGGTGCATTGGCCCTTGGTTTGATTTCTTACC  
TATTATAA

TTCTAGCAGCTTTCTCCTTGAATTGATTCAAGGCCTTGTATGGGCCTCCTGTTTCCAGGATCCACTCTAGAAG  
GCTCCTCCTCATGATGTTCTTCCGTTTCTGTGGTTGTTCTGGTTGTTGTTGTTGTTGTTGTTGTTGTTGTTG  
TTGTGCGC

CTGATGAACCGGAAACGGAGGAACCAGATTGTGTAACAGAACCGGACGTGCTGGAGGCTGATGAACCGGAA  
GCGGTACCAGATTGTGTGATAGATGATTGATGCTGATGAGGATGAGCCTGATTCTGTGACAGAACCGGA  
TGAGCTAG

AGCGGTTGAACCGATTACGGAAGCACCGAATGAAGTGAACCGGAAAGTAGAGTTGGTAGCCCTGATGTGG  
TAGATGTGGATGAGGGTGTAGCGCTGGAAGCAACAACACCTCCGTAATTTAGATAATAAGCATAGGCACCA  
GCAAATGT

AGTCTTAGTGTAGACGTGACCGTTCTTGGTGGCAGTGATAGTGGTAGTGATACTAGAACCAGAACCTTCAT  
CAGCAGAAGAAGTCTCAGCAGCAGAAGAAGTCTCAGCAGCAGAAGTGGTAGCGGCAGCAGAAGTGGTAGCG  
GCAGCAGA

ATTGTCGTCTTCGTCTTCATCTTCGTCTTCCCCTTCTTCATCTTCATCTTCTTCGTCTGCAACGTCTCTTG  
GGTCAACAGAAAGACCTGTTACACTTCTGGGTGTCTCAGATCCAACCTACGTTATCGACACTATCGTCTGAC  
TCATTCTC

AAAGTAGCATCTTGGGTGACAGTCTTAGTGTAGACGTGACCGTTCTTGGTGGCAGTGATAGTGGTAGTGAT  
ACTAGAACCAGAACCTTCATCAGCAGAAGAAGTCTCAGCAGCAGAAGAAGTCTCAGCAGCAGAAGTGGTAG  
CGGCAGCA

AGATTCAGCGGCAGAAAGTGCTGCTGGCGTAAGAGTCTTACCACCCCAAACAAAAGTAGCATCTTGGGTGA  
CAGTCTTAGTGTAGACATGACCGTTCTTGGTGGCAGTGATGGTGGTGGTGATACTCTCAGCAAGAGCAGTA  
GCGGCAAC

AGAGTCTTACCACCCCAAACAAAAGTAGCATCTTGGGTGACAGTCTTAGTGTAGACATGACCGTTCTTGG  
TGGCAGTGATGGTGGTGGTGATACTCTCAGCAAGAGCAGTAGCGGCAACAGCAGATAGAACCAAAGCGGAA  
GAGAATTT

TTTCGTAAATTTCTGGCAAGGTAGACAAGCCGACAACCTTGATTGGAGACTTGACCAAACCTCTGGCGAAG  
AAGTCCAAAGCTTCTCTGGTGTGACGCTCTGTTACCGACGTAAGAACCAACAATAGAGATGGACTTGACGAC  
TTGGTTGA

ACTGGTGCAAGCCATAGGTAGCCTCACTACGGTACAGAGGTTACTTTGAAAGCAAGAACCCTTCACATGTC  
ACACCTGCACGCAGAGGCATGGAGAGGCCAGCACAAACCACCATGGATGGGTAAAGTCATAGAAGGAAAAAG  
CACATGGT

CCGTTGTAGATACCGACGACGGAACCGATCATTCTTCTGGAACAATGATCATGTTTCTCATGTGGGTTCTGAC  
TGGAGCTGGCTTTTCAATTTCTGGGGCAGCCAACCTTGGCAGCTCTCAACTTCTTCATGAAACCGGCTGGCT  
TGAAGTC

AGTGGAAGAGGCAGCCTTGGTAGAGGAAGCGACGGTGGAAAGAGGTAGCCTCACTGGAAGAAGCGACAGCAG  
AAGAAGTAGCAGCAGAAGAAGAAGCTTCACTGGAAGAAGCGACGGCAGAAGAAGTAGCTTCACTGGAGGAA  
GCGACGGC

GGAAACGGAGGAACCAGATTGTGTAACAGAACCAGGACGTGCTGGAGGCTGATGAACCGGAAGCGGTACCAG  
ATTGTGTGATAGATGATTGATGCTGATGAGGATGAGCCTGATTCTGTGACAGAACCAGGATGAGCTAGGA  
ACCGAAGA

AAGTAATAGAAGATGAGCCGGAGACTGAAGAGCCTGATGAAGTAATAGAGCTCGAGACTTCAGAGGACGAG  
GTTGATGGAGCAATGGAGCTCGAGACTTCGGTGGAGGATGACGTTAACTCAGTGAGAGAGCTCGAGACATC  
AGAAGTAG

TGCCAGCTGCCGATGCCTTATTGGAAATGATTGTCTTGCCTTGGCATCTCCAGTCACTGCTCAAGCCTAC  
AGAGCTGAACAATTATACGAAGGTCCAGCTGACGATGCCAACTGTATTGCTATCAAGAAGTGTGATCCAAA  
GGCTGATT

TTTGATAGAGATTCCACTAAGGTTAATTCTCAAGAAGAGACAACACCTGGGACATCAGCTGTTCCAGAGAA  
CCATCATCATGTCTCTCCTCAACCTGCTTCAGTACCACCTCCACAGAATGGACAGTACCAACAGCACGGCA  
TGATGACC

TATACTCCCTAGATCCACGTCAAAATGCTCCAATCTTATTATTGGAGAACACTCAAAGCCAGACTCTCTTG  
GTATCACGACCGTTCTGATTTGACTCAGGAATTTGCCTGTGAGGAGCTTTAATCCATTATCTGCTGCAT  
ATAGAACG

TGATCAATCATCGATTAACCATTAGTGATAAGAAACAATGTCTTTGGAAAGAGAGGAACCACAACATTTG  
GAGCAGGGCCAGCTCAAATGCCTACACCAGTTTTGCAACAAGCTGCTAAAGACTTAATCAATTTCAATGAC  
ATAGGTTT

CAAGACCGTCATGTCATCTTCTTGGCTGAAAGAAGAATCTTGCCAAAGCCATCTAGAACATCTAGACAAGT  
CCAAAAGAGACCAAGATCCAGAACCTTGACTGCTGTTTCATGACAAGATCTTGGAAAGACTTAGTCTTCCAA  
CTGAAATC



GGCAGTGATAGTGGTAGTGATACTAGAACCCAGAACCTTCATCAGCAGAAGAAGTCTCAGCAGCAGAAGAAG  
TCTCAGCAGCAGAAGTGGTAGCGGCAGCAGAAGTGGTAGCGGCAGCAGAGGTTTCGGCGGCAGAAGTTTCG  
GCGGCAGA

CGAAGGTTGTAAAACCTATGATCGATTATTTTTGAAAGCCATGGTGCTCATAAATGCCCTGCTGACGCCAAC  
CAGCTGAATGGATGCTAGAAGTTGTTGGTGCAGCTCCAGGCTCTCATGCAAATCAAGATTATTACGAAGTT  
TGGAGGAA

GCTTCTCTGGTGTGCTAGCTCTGTTACCGACGTAAGAACCAACAATAGAGATGGACTTGACGACTTGGTTGAA  
GACATCAGAACAACACTTGGCACCAGCTGGCATAACCGACAAAACGGTGGTACCGTTAGCTCTAACGTATC  
TGGTAGAA

AGCCGAAGAGGTAATAGAACTTAAGGTACCGGAGGTGATAGAACCCAGAGGCAGTGGAAGCCGATGAGGTTG  
ATTGAGGAATTGAACTCGAGATACCTGGAGCAGAAGAAGCTGATGAACCGGAAACGGAGGAACCAGATTGT  
GTAACAGA

CACAACCACCACCACCCAGCTAGTTCTGCTTCCAGCGTTATTATCTCAACCAGAAACGGTACCACTGTTA  
CTGAAACTGACAACACTCTTGTCAACAAAGAAACCACTGTCTGTGACTACTCTTCAACATCTGCCGTTCCA  
GCTTCCAC

CCACATAGGCACGTAACCAGTAATACCCTGAATTCTGCCGGTGAAATAGCCTCCTTCCACAGGCCACTGG  
AAGAAGAGGGCCAGCACCACCACCTCCTCCAAGAGCATCTCGCCCCACACCAAACGTTACGATGCAACAAA  
ATCCACAA

TTGAACTCGAGATACCTGGAGCAGAAGAAGCTGATGAACCGGAAACGGAGGAACCAGATTGTGTAACAGAA  
CCGGACGTGCTGGAGGCTGATGAACCGGAAAGCGGTACCAGATTGTGTGATAGATGATTACAGATGCTGATGA  
GGATGAGC

ATCGAGAAGGCTAGAGTGGAGGCCCAAAGTCACAGACTAACGTTGGAGGATCCCGTGACGGTGGAGTATCT  
CACACGTTATGTGCTGGTGTGCAACAAAGGTACACGCAGTCAGGAGGTGTTAGACCATTTGGTGTGTCGA  
CGCTGATT

CTTAGAGAACTGATAGAAAAGCAGATCATGGGCAGTAGATCGGAGAATGTGGGAACAGTGACTAGAGAAGG  
CTCCAGAGTGGAAACAAGATGATGTCCTCATGGATGATGACTCTGACTCATCGGAATACGTGGATATGTGGA  
TCGATTTA

TAGACGTGACCGTTCTTGGTGGCAGTGATAGTGGTAGTGATACTAGAACCCAGAACCTTCATCAGCAGAAGA  
AGTCTCAGCAGCAGAAGAAGTCTCAGCAGCAGAAGTGGTAGCGGCAGCAGAAGTGGTAGCGGCAGCAGAGG  
TTTTCGCG

CAGCAAAATATGCAACAGTCACTACAGCAAATGCAGCATTTACAGCAATTGAAAATGCAGCAGCAACAACA  
ACAGCAGCAACAACAACAGCAGCAACAACAACAGCAGCAACAACAACAGCAACAGCACATATATCCCTCCT  
CGACTCCT

CGTCAGGACTAGTGCGATTACCACTGAAAGTACCAACTCCAGCACTAATGCTACTACCACTGCCAGCACCA  
ACGTCAGGACTAGTGCTACTACCACTGCCAGCATCAACGTCAGGACTAGTGCGACTACCACTGAAAGTACC  
AACTCCAA

CCGTGCAATCATCTACATCCTCCTCATCCTCCTCATCCTCCTCCTCCTCCTCCTCCTCCTCCTCCTCCTCCT  
GCTCCTGCTGCATTCCAAGGAGCAAGTGTGGTGCATTGGCCCTTGGTTTGATTTCTTACCTATTATAAGC  
TCGGTTTT

GCATTCCCTAACTCAACAACCTCAATCTGGAGGAGCTCCAGCTCCACCCACCTCCTCAAATGCCAGCTAC  
ATCAACATCCGGAGGCGGTTTCATTGCTGAAACTACTGGAGATGCAGGTCGTGATGCACTTTTAGCTTCAA  
TTAGAGGG

TCTCTAACTACCTCAAGTTCTGCTGCCACATCTTCAAGTGAAGTTGCTAGCTCTTCTATTGCTTCATCCAC  
TAGCTCTTCTGTTGCACCATCCTCAAGTGAAGTTGTCAGCTCTTCCGTTGCACCATCCTCAAGTGAAGTTG  
TCAGCTCT

TTTTCCATCTTTTTCGTAAATTTCTGGCAAGGTAGACAAGCCGACAACCTTGATTGGAGACTTGACCAAAC  
TCTGGCGAAGAAGTCCAAAGCTTCTCTGGTGTGAGCTCTGTTACCGACGTAAGAACCAACAATAGAGATGG  
ACTTGACG

ACTTGACAGTATTCCAAACTTTATACACAGTGGCAAGACTGAAGACACCAAGGAACCGAATCAAGGGTGTG  
GATAGGGACACATTTGCCAAACACATGACTGAAGTGGCAATGGCAACTTACGGACTGAGCCACACTGCAGA  
TACAAAAG

TTCAGTAAGATAAAGTTAGCGCACACTTTCTACTTTAAGCTCACCAAATGGCATCCCCAGGATCGACAGCA  
TTACCACACAAGCGACAAAGAGTCCGAAAGGCTTGCCTGCCCTGTAGGGAACGTAAAAGGAAATGTAATGG  
CAAATCTC

CGACTAGGTTTTGATAGCACGTTGGAAGACATACGGAAGGGCAAAAGAACTGTCTTCCCTGTGTCCGGATGC  
ACGGTGGAGTCCAGTTGTTTCTTGGCTCGCCAGAACTCCGGAGTAGTCTCTTTTAGTTACCCGTGACGATA  
CGCACTGA

GCTCAAGCTCAAGCTCAAGCTCAGGCACAGGCTCAAGCACAAAGCTCAAGCACAGGCGGCACAAGCGGCGCA  
AGCGCAAGCACAAAGCACAAAGCACAAAGCACAGGCACAGGCACAGGCACAAGCCCAGGCGCAGGCC  
AAGCCAA

TCGTAAAGAATATCATCATAAAGTATGGTATACAAAATTTACTGTGCAACAACAGCACAAATGCAGTCCATG  
ATCTGCTCATCTGAGCACGAAAACCTAACCTGCAAGTACTGGCCTGTTAGCTTCCCTCGCTTCTTGGTGTGA  
GAATGGGT

ATTCTTGTGGAAGACTGGTACTTTGACCACCAGTGAAACTGCTCACAACATGAAGGTCATGAAATTTCTCTG  
TCTCTCCAGTTGTGCAAGTCGCTGTGCAAGTCAAGAACGCTAACGACTTACCAAATTTGGTCAAGGTTTTG  
AAGAGATT

AGAAAGTTCTTGCCAGCTGCCGATGCCTTATTGGAAATGATTGTCTTGCACCTGCCATCTCCAGTCACTGC  
TCAAGCCTACAGAGCTGAACAATTATACGAAGGTCAGCTGACGATGCCAACTGTATTGCTATCAAGAACT  
GTGATCCA

GTGTAACAGAACCAGGACGTGCTGGAGGCTGATGAACCGGAAGCGGTACCAGATTGTGTGATAGATGATTCA  
GATGCTGATGAGGATGAGCCTGATTCTGTGACAGAACCAGGATGAGCTAGGAACCGAAGAAGCGGAGCCTGA  
TTCTGTGG

AAAGGACTTGGAAGGTAAGGCCTTGTTGAAGGTTGTTATGAGAAAGTTCTTGCCAGCTGCCGATGCCTTAT  
TGGAAATGATTGTCTTGCACCTGCCATCTCCAGTCACTGCTCAAGCCTACAGAGCTGAACAATTATACGAA  
GGTCCAGC

AATTAGATCCTTGCTTACTTCTCAAACCTTGTAAAGCGGTACCATAACATGACGTAATCATAATCATCTGCAA  
GGGATCTGTACCAGCCTGTGGAGGCTCCAGCTTCTTGTGCGAGAAGAGTCGTTAGCTGGGGTGTCTTCG  
AGGTTTTAA

AAACAGATGGGGAGCCGGAATCAAGGTGGAAGCCGTTGAACCAGTCACGGAAGCACCGAATGAAGTGGAA  
GCGGTTGAACCAGTTACGGAAGCACCGAATGAAGTGAACCAGGAGTAGAGTTGGTAGCCCCTGATGTGGT  
AGATGTGG

TCTTTGGGAATTCAAAGATTCTGGCATCGTCAGTAACAGTACCAACAACGACAACAGTCTTGTAGCAGCA  
CCTTCTTGTCTCAAAGCTCTAGCAATTCTAGAGACAGAAACAGGTGGTCTGTTGATCTTAGACAAGAACAA  
AGCCTTCA

AGATGGGGTACTAAGAAATTGCCAAGAAAGACTCACAGAGGTCTAAGAAAGGTTGCTTGTATTGGTGCTTG  
GCATCCAGCCCACGTTATGTGGAGTGTGGCCAGAGCTGGTCAAAGAGGTTACCATTCCAGAACCTCCATTA  
ACCACAAG

TTATAGATTTTCGTTACCGATAGTCTTTCCCTTCAGAATTTCTTTCCGGTCCTCTTCAATGTCACTGACAACTTC  
AGAAACCTCTTCACTCAGGTTGTCTGTCATCTCTAAATTGGTTGTAATAAAAAGAACTAGGTATTTGTGTAG  
ATAGTTGA

TCTGGTAGAAGCTTCAATAGCGGCTTCGGAAACGGAAACGTTGATGACACCGTGAGCACCACCGTCAGTGG  
CCTTTAGAACAGCACCGACAATGTCCTTTTCTTAGTGAAGTCAATGAAGACTTCACCACCGATGGATCTG  
AATAATTC

GGGGCTCTTCAAGAAGCAGAGATAACTCTTTTCAGAGGCGGTAGTGGCTGGGGTAGCGATTCCAAGTCTTCT  
GGCTGGGGTAACAGCGGTGGTTCAAACAACCTCTTCTGGTGGTGATTTTCAGACAAACTAGGGTGAGGATTC  
TTCGTTTT

CACTGACTATTCTTGTCAAAGTACAATCCTGACGATACCATTGCTCCTCCTCAAGATGCCACTGAAGAAT  
CACAAACAAAATCTCTGAGATTCTTGCACAAGGGTGGAAGCAGAAGATCTCCAAAACAGATTGGAAGAAGA  
AACACCGC

CACCAGCCTTAACAATCTTGGCTCTGGCACCAGCAGTGAATCTCAAAGCAGCAACAGTGGTCTTTGGGAAT  
TCAAAGATTCTGGCATCGTCAGTAACAGTACCAACAACGACAACAGTCTTGTTAGCAGCACCTTCTTGCTT  
CAAAGCTC

TATCAGATGCAACAACAGCAACAAGCTCAAGCTCAAGCTCAAGCTCAAGCTCAGGCACAGGCTCAAGCACA  
AGCTCAAGCACAGGCGGCACAAGCGGCACAAGCACAAGCACAAGCACAAGCACAAGCACAAGCACAAGGCAC  
AGGCACAG

AAGATGAACTGGAGACTGATGAGCCTGATGAAGTAATAGAAGATGAGCCGGAGACTGAAGAGCCTGATGAA  
GTAATAGAGCTCGAGACTTCAGAGGACGAGGTTGATGGAGCAATGGAGCTCGAGACTTCGGTGGAGGATGA  
CGTTAACT

GAAGAAGTAGCAGCAGAAGAAGAAGCTTCACTGGAAGAAGCGACGGCAGAAGAAGTAGCTTCACTGGAGGA  
AGCGACGGCAGAAGAAGTAGTTTTCACTGGAGGAAGCAACAGCGGAAGAAGTAGCAGCAGAAGAAGCTTCA  
TAGAAGAG

GTGGTAGTGATACTAGAACCAGAACCTTCATCAGCAGAAGAAGTCTCAGCAGCAGAAGAAGTCTCAGCAGC  
AGAAGTGGTAGCGGCAGCAGAAGTGGTAGCGGCAGCAGAGGTTTCGGCGGCAGAAGTTTTCGGCGGCAGAAG  
ATTCAGCG

GAGCTAAGAAAGTGTATAATTTGACTAACAATTTCAAGTAGACATTGTCAGACTTTGGAGCAGTTCTGTGA  
CCAGATCTCTTGTGTTGCTTGGAAAGTGTGATCGATACCATTGTGAATCCGTAAGCTTGATGATCTCTTCT  
TGTGATGG

GCAACAGTTCAGGGAATCATCTCATCAAAGAACCTCCATCAGAGCTCAAAGTTCATCATCCAGACAG  
GACAAGCAGCTCAACAAGGATAAAGAATCTCCGCTTCTGAGTTGACCATGCTTATTGAACATATGGTGTGA  
TTGCGATT

GATTGGAGACTTGACCAAACCTCTGGCGAAGAAGTCCAAAGCTTCTCTGGTGTGAGCTCTGTTACCGACGT  
AAGAACCAACAATAGAGATGGACTTGACGACTTGGTTGAAGACATCAGAACAACACTTGGCACCAGCTGGC  
ATACCGAC

AGCCCACATTTCTTACGAGGCAGGTATCTTGGAAAGACCCAGATACCACCCACCAAAGGACATGTGGAAAT  
TGATCGTCGATCCAATGGATGCTCCGGACCAACCACAAGATTTGACCATTGACTTTGAACGTGGTCTTCCA  
GTCAAGTT

GCCCAAGCACAAGCACAAGCACACGCTCAGCACCAGCCCTCCCAACAACCACAACAAGCTCAGCAACAACC  
TAACCCACTACATGGGTTGACACCTACTGCAAAGGATGTGCAAGTAATTAAGCAATTGTCCTTGGATGCTT  
CTAAGACC

TTTGGTTCATCATCGTCATAGTACTCGCCCTCCTCCTCGTCATCTTCTTCAGATCCGCTTGAGCCGTCTTC  
TTCATCATCTGAGAATTCTCTGTGCCAGAACTACATTTCGTGGTCAGCGTTATCAAATTCAAATTGCTCAG  
AAGCAGCA

TTGTGCACCGTAGAATTGTAGAATACAAATACATAAATAAGTGTGTTCCCGAAGGACTAAGGAATGACGGC  
AGAGGAGTCTTGTGACCGCCCTGCTGCAAAACTTGGCAAGGACAGAAATTAAGTAATAGATACGCACAACC  
TTGGAGCA

GAACCAGATTGTGTAACAGAACC GGACGTGCTGGAGGCTGATGAACCGGAAGCGGTACCAGATTGTGTGAT  
AGATGATT CAGATGCTGATGAGGATGAGCCTGATTCTGTGACAGAACC GGATGAGCTAGGAACCGAAGAAG  
CGGAGCCT

CATTGCTAGCTCTTCTTCCACTGCCAGACTTCTATCTCGACCATTGCTCCTTACAACCTCCACAACCACCA  
CCACCCAGCTAGTTCTGCTTCCAGCGTTATTATCTCAACCAGAAACGGTACCCTGTTACTGAAACTGAC  
AACACTCT

TTGCACTAGAAGCCGAAGAGGTAATAGAACTTAAGGTACCGGAGGTGATAGAACCAGAGGCAGTGGAAGCC  
GATGAGGTTGATTGAGGAATTGAACTCGAGATACCTGGAGCAGAAGAAGCTGATGAACCGGAAACGGAGGA  
ACCAGATT

CTAAGTTCACAAGCGTGAAGTTGTGCAAGCTGTCACCGTTGTTGACACTCCACCAGTTGTCGTTGTTGGT  
GTTGTCGGTTACGTCGAAACCCCAAGAGGTTTGAGATCTTTGACCACCGTCTGGGCTGAACATTTGTCTGA  
CGAAGTCA

ATTGATTCAAGGCCTTGTTATGGGCCTCCTGTT CAGGATCCACTCTAGAAGGCTCCTCTTCATGATGTTCT  
TCCGTTTTCTGTGGTTGTTCTGGTTGTTGTTTCGTGTGACTGTTGGGTGTGATTGTCGCCGGACGTTTTCCC  
CAATCCTG

AAACTCTCATATAGGTCTTGGATTTTGGTCTCCCTTCATCTCCGTCATGTCCGTCGCTTCTTCATCTTC  
TTCTGACCCAGTCTAGACTGTGAACGTCTTTTGTCTCTTTCTGATATCCTTGATGATCTCCTTCTAATAC  
CATCCCTT

CTTGGCTGAAAGAAGAATCTTGCCAAAGCCATCTAGAACATCTAGACAAGTCCAAAAGAGACCAAGATCCA  
GAACCTTGACTGCTGTT CATGACAAGATCTTGGAAGACTTAGTCTTCCCAACTGAAATCGTTGGTAAGAGA  
GTTAGATA

AGGCTACGATCCGTGGGATTTACTGAGCAAGAAATCGAACTGCTGAGGCAACAGTTTTCGGGCCACGTATGG  
AGATTTGGAGGAGGAGGAGGAGACTTGGCTCAAAATGGCAACAGAGATGATGAGGGCCATGACATTAGAC  
AGTTGGAG

ATGCAGATTCCAGAATTCTTATCGAGAAGGCTAGAGTGGAGGCCCAAAGTCACAGACTAACGTTGGAGGAT  
CCCCTGACGGTGGAGTATCTCACACGTTATGTCGCTGGTGTGCAACAAAGGTACACGCAGTCAGGAGGTGT  
TAGACCAT

TCTCAAAGCAGCAACAGTGGTCTTTGGGAATTCAAAGATTCTGGCATCGTCAGTAACAGTACCAACAACGA  
CAACAGTCTTGTTAGCAGCACCTTCTTGCTTCAAAGCTCTAGCAATTCTAGAGACAGAAACAGGTGGTCTG  
TTGATCTT

TGTATTTATGTCTTTCAAGTTTCTTCTTGGATTTGCACCCTCCGCTGCGATGTGTACAGACGTTGCTTTCT  
TTTCGCTGGACTGTCTGGCCACCTGGTTAGGTGGAGTTTGTCCACATCCGACCTGAGACTACCCAACCTT  
GGATCGCT

CAGTGGGAAGCCGATGAGGTTGATTGAGGAATTGAACTCGAGATACCTGGAGCAGAAGAAGCTGATGAACCG  
GAAACGGAGGAACCAGATTGTGTAACAGAACCGGACGTGCTGGAGGCTGATGAACCGGAAGCGGTACCAGA  
TTGTGTGA

ACAAAGTGATCAAGACATAGGGAAACGCCAACCAATTTCAACAGCAGCAGCAGCCCCAACAGCAGCAGC  
AGCAGCAGCAACAGCAACAGAGACAACACCAGGTCCAGACACAACAACAAAGACAGATACCTGATAGGAGA  
TCTCTTTC

GGAAACGCCAACCAATTTCAACAGCAGCAGCAGCCCCAACAGCAGCAGCAGCAGCAGCAACAGCAACAG  
AGACAACACCAGGTCCAGACACAACAACAAAGACAGATACCTGATAGGAGATCTCTTTCACTTTCTCCTTG  
TACAAGAG

CAAGACATAGGGAAACGCCAACCAATTTCAACAGCAGCAGCAGCCCCAACAGCAGCAGCAGCAGCAGCA  
ACAGCAACAGAGACAACACCAGGTCCAGACACAACAACAAAGACAGATACCTGATAGGAGATCTCTTTCAC  
TTTCTCCT

AACAAGAAGGACAAAGTGATCAAGACATAGGGAAACGCCAACCAATTTCAACAGCAGCAGCAGCCCCAA  
CAGCAGCAGCAGCAGCAGCAACAGCAACAGAGACAACACCAGGTCCAGACACAACAACAAAGACAGATACC  
TGATAGGA

CCGGCAGGGCATCGTAGTAGTCTGGATCAACGATGACGTGACAGGTGGAGCAGGCACAAGAACCGCCGCAT  
GCGCCCTCCATGTCCAGGTTGTGACCTTGAGCGATGTCCAGGATGGTTTTCGCCCTCACAGACTTCGTACGT  
CTTCTGGG

CTGTTGGTAAGCAAATTGTCAACATCCCCTCTTTCATGGTCAGATTGGACTCTGAGAAGCACATTGACTTT  
GCTCCAACATCTCCATTTCGGTGGTGCTAGACCAGGCAGAGTTGCTAGAAGAAATGCTGCAAGGAAGGCGGA  
AGCTTCTG

TCTTCAGGTTCCGGCAGGGCATCGTAGTAGTCTGGATCAACGATGACGTGACAGGTGGAGCAGGCACAAGA  
ACCGCCGCATGCGCCCTCCATGTCCAGGTTGTGACCTTGAGCGATGTCCAGGATGGTTTTCGCCCTCACAGA  
CTTCGTAC

AGGCACATTGCTGTTGGTAAGCAAATTGTCAACATCCCCTCTTTCATGGTCAGATTGGACTCTGAGAAGCA  
CATTGACTTTGCTCCAACATCTCCATTTCGGTGGTGCTAGACCAGGCAGAGTTGCTAGAAGAAATGCTGCAA  
GGAAGGCG

AATCACTCAAAGGCACATTGCTGTTGGTAAGCAAATTGTCAACATCCCCTCTTTCATGGTCAGATTGGACT  
CTGAGAAGCACATTGACTTTGCTCCAACATCTCCATTTCGGTGGTGCTAGACCAGGCAGAGTTGCTAGAAGA  
AATGCTGC

AATCAGCCAGAACAAGAAGGACAAAGTGATCAAGACATAGGGAAACGCCAACCAATTTCAACAGCAGCA  
GCAGCCCCAACAGCAGCAGCAGCAGCAACAGCAACAGAGACAACACCAGGTCCAGACACAACAACAAA  
GACAGATA

TTGCTCGGGGATAGTAATAATGCGGGGGGAAGACGAAACAGACCGTGTGTGGTGTGGGTGGGATTTCTGTG  
GGAGCACGTGGCGAGCAGAGGAAGAGCCTCACACAATGCTGCGTTCTTCATAAAGGGGATCAAAGCAAATA  
GATAATCG

TCTCTTTCTCTTCTTGGTGGTCTTGAGGAGCTTTGGAAGTTGGAACCTCTGGCTGCACTCCAGTCAATATC  
TGGCTCTTCTCTTCTTCTTGGTGGCCTCGAGGAGCTTTGAAAGTTAGAGCCTCTAGCTGCACTCCAGT  
CAATATCT

TTTAGGATCTGATGCTTATGTTGTTTCAAGATCAATGACCCAGAAGGTCTCGGATGGGGTCAAAGCCCTAA  
TTTGTGGGGTTGTTGGCGTGGGGATGATGTGTTCTTTGTACCTCAACTATCAATATTGTTACTATTCTTC  
ACTCCACC

CAAACCTGAGCACCTCTGGCAGCACCCCAATCCAAAGCTGGTTCTTCCTTTTCTCTTTCTCTTTCTTTGGTGGT  
CTTGAGGAGCTTTGGAAGTTGGAACCTCTGGCTGCACTCCAGTCAATATCTGGCTCTTCTCTTTCTCTTTCT  
TGGTGGCC

ACCACTGAAAGTACCAACTCCAGCACTAATGCTACTACCACTGCCAGCACCAACGTCAGGACTAGTGCTAC  
TACCACTGCCAGCATCAACGTCAGGACTAGTGCGACTACCACTGAAAGTACCAACTCCAACACTAGTGCTA  
CTACCACC

AAGTGTGAGTTTGCTCGGGGATAGTAATAATGCGGGGGGAAGACGAAACAGACCGTGTGTGGTGTGGGTG  
GGATTTTCGTGGGAGCACGTGGCGAGCAGAGGAAGAGCCTCACACAATGCTGCGTTCTTCATAAAGGGGATC  
AAAGCAA

TGAGGCTTACCAAACCTGAGCACCTCTGGCAGCACCCCAATCCAAAGCTGGTTCTTCCTTTTCTCTTTCTCT  
TCTTGGTGGTCTTGAGGAGCTTTGGAAGTTGGAACCTCTGGCTGCACTCCAGTCAATATCTGGCTCTTCTC  
TTTCTCTT

ATCGTAGTAGTCTGGATCAACGATGACGTGACAGGTGGAGCAGGCACAAGAACCGCCGCATGCGCCCTCCA  
TGTCCAGGTTGTGACCTTGAGCGATGTCCAGGATGGTTTTCGCCCTCACAGACTTCGTACGTCTTCTGGGAG  
CCATCCTT

GCTGTACGTTTCAGTGACAATAAAGGATTGTGCATGCATATGTGTGTGGCTGTGACTATGAGTATGTTGCAAC  
AACGACTTCACAGAGGAAGCCTTGCCTTCCTTCTTTCTTCACTTTTATTCTGTCTGGAATTCGATCCATT  
CTGTGAAG

ATGATTTCTTCGGATTCTTCAATGGTTGGGCTTTCTCTTCTTTCGCAGTGGCTGTCTCAGAATCCTCATGA  
TCTGCTTCCTTGTACCAGAGTCATCCTCCTCAGGGACATGCTCTAGCTCCGACTCCTGACCAACGCTGTT  
TCCGCCTG

AGCGTTGGAGATACCTTGACCTAATGGACCGGTAGTAACTTCAACACCTGGCAACTCAAATTCAGGATGAC  
CTGGTGTCTGGAACCAACTGTCTGAACTGTTTCAAGTCTTCAATAGACAGATCGTAACCAAGTCAAATGT  
AGCATAGA

AACACTCTCAAGATAGAGTTGAGTCTTCTGATATCCAGGAAGCCTTGTCAAGATTGCAACAAGAGGACAAG  
GTCATTGTCTTGGCGAGGGTGTAAAGGAGATCAGTTCGCCTGAATAACCGTGTCTGATGCTGTCTACTACA  
ATCATTCC

AGGACCCAGAATCAGCCAGAACAAGAAGGACAAAGTGATCAAGACATAGGGAAACGCCAACCAACAAATTC  
AACAGCAGCAGCAGCCCCAACAGCAGCAGCAGCAGCAACAGCAACAGAGACAACACCAGGTCCAGACA  
CAACAACA

CCCCTCTTCAATGATTTCTTCGGATTCTTCAATGGTTGGGCTTTCTCTTCTTTCGCAGTGGCTGTCTCAGA  
ATCCTCATGATCTGCTTCCTTGTACCAGAGTCATCCTCCTCAGGGACATGCTCTAGCTCCGACTCCTGAC  
CAACGCTG

ACCACAATTTCAACAGCAGCAGCAGCCCCAACAGCAGCAGCAGCAGCAGCAACAGCAACAGAGACAACACC  
AGGTCCAGACACAACAACAAGACAGATACCTGATAGGAGATCTCTTTCACTTTCTCCTTGTACAAGAGCC  
AATTCCTT

ACCTCTGGCAGCACCCCAATCCAAAGCTGGTTCTTCCTTTTCTCTTTCTCTTTCTTTGGTGGTCTTGAGGAGC  
TTTGGAAGTTGGAACCTCTGGCTGCACTCCAGTCAATATCTGGCTCTTCTCTTTCTCTTTCTTTGGTGGCCTC  
GAGGAGCT

GTTTTTCATCATCTTTCAGGTTCCGGCAGGGCATCGTAGTAGTCTGGATCAACGATGACGTGACAGGTGGAGC  
AGGCACAAGAACCGCCGCATGCGCCCTCCATGTCCAGGTTGTGACCTTGAGCGATGTCCAGGATGGTTTTCG  
CCCTCACA

CTTTGGAAGTTGGAACCTCTGGCTGCACTCCAGTCAATATCTGGCTCTTCTCTTTCTCTTCTTGGTGGCCT  
CGAGGAGCTTTGAAAGTTAGAGCCTCTAGCTGCACTCCAGTCAATATCTGGCTCTTCTCTTTCTCTTCTTG  
GTGGTCTG

TTAATATGTTGTTGATTTCTCATCTGGTCCAATCAAGACACCTGTTGGTGCCTGTGCCACATCCGTGGAA  
TCTGTTGACATTGGTGTAGAAACCATCTTGTCTGGTAAGGCTAGAATCTGTATTGTCCGGTGGTTACGATGA  
TTTCCAAG

TTCTTCCTTTTCTCTTTCTCTTCTTGGTGGTCTTGAGGAGCTTTGGAAGTTGGAACCTCTGGCTGCACTCC  
AGTCAATATCTGGCTCTTCTCTTTCTCTTCTTGGTGGCCTCGAGGAGCTTTGAAAGTTAGAGCCTCTAGCT  
GCACTCCA

TCCTTAAACTGTGAAAGAAAGAATAGCGATACAAATGTCTAGGCAGTCCCTAGGACAGTGCCGGAGTTGTC  
ATTGTGGAGAGGCAATGGTGTCTGTGGACATTAACGGTTCGTAATCTTTAGTTCTGTGATATCCTCAT  
CTCTGTAA

GCACCCCAATCCAAAGCTGGTTCTTCCTTTTCTCTTTCTCTTCTTGGTGGTCTTGAGGAGCTTTGGAAGTT  
GGAACCTCTGGCTGCACTCCAGTCAATATCTGGCTCTTCTCTTTCTCTTCTTGGTGGCCTCGAGGAGCTTT  
GAAAGTTA

TCTGAGAAGCACATTGACTTTGCTCCAACATCTCCATTCCGTGGTGGTCTAGACCAGGCAGAGTTGCTAGAAG  
AAATGCTGCAAGGAAGGCGGAAGCTTCTGGTGAAGCTGCTGATGAAGCTGATGAGGCCGATGAAGAATAAT  
TGTGCTGA

AATCATTTATCAACACCATGTCCGCTTGGGTTAATATGTTGTTGATTTCTCATCTGGTCCAATCAAGACA  
CCTGTTGGTGCCTGTGCCACATCCGTGGAATCTGTTGACATTGGTGTAGAAACCATCTTGTCTGGTAAGGC  
TAGAATCT

CCAAAGCTGGTTCTTCCTTTTCTCTTTCTCTTCTTGGTGGTCTTGAGGAGCTTTGGAAGTTGGAACCTCTG  
GCTGCACTCCAGTCAATATCTGGCTCTTCTCTTTCTCTTCTTGGTGGCCTCGAGGAGCTTTGAAAGTTAGA  
GCCTCTAG

TTTAACATACACAAACACATACTATCAGAATACAATGACTAAGCTACACTTTGACACTGCTGAACCAGTCA  
AGATCACACTTCCAAATGGTTTGACATACGAGCAACCAACCGGTCTATTATTAAACAACAAGTTTATGAAA  
GCTCAAGA

TCCGCTTGGGTTAATATGTTGTTGATTTCTCATCTGGTCCAATCAAGACACCTGTTGGTGCCTGTGCCAC  
ATCCGTGGAATCTGTTGACATTGGTGTAGAAACCATCTTGTCTGGTAAGGCTAGAATCTGTATTGTCCGGT  
GTTACGAT

CCGGTGTCAAGCCAGGTATGGTTGTTACTTTTTGCCCCAGCTGGTGTACCCTGAAGTCAAGTCCGTT  
GAAATGCATCACGAACAATTGGAACAAGGTGTTCCAGGTGACAACGTTGGTTTTCAACGTCAAGAACGTTTT  
CGTTAAGG

TCTGGATCAACGATGACGTGACAGGTGGAGCAGGCACAAGAACC GCCGCATGCGCCCTCCATGTCCAGGTT  
GTGACCTTGAGCGATGTCCAGGATGGTTTTCGCCCTCACAGACTTCGTACGTCTTCTGGGAGCCATCCTTCA  
GAATAAAA

CAAGAGTTTTAATCACTCAAAGGCACATTGCTGTTGGTAAGCAAATTGTCAACATCCCCTCTTTCATGGTC  
AGATTGGACTCTGAGAAGCACATTGACTTTGCTCCAACATCTCCATTCGGTGGTGTAGACCAGGCAGAGT  
TGCTAGAA

TAATTTCTCGTTTAGGATCTGATGCTTATGTTGTTTCAAGATCAATGACCCAGAAGGTCTCGGATGGGGTC  
AAAGCCCTAATTTGTGGGGTGTGGCGTGGGGATGATGTGTTCTTTGTACCTCAACTATCAATATTGTT  
ACTATTCT

GACCTATCCTTGTAGGTATTTTTGGTTTTGTTGAGGCTTACCAAACCTGAGCACCTCTGGCAGCACCCCAATC  
CAAAGCTGGTTCTTCTTTTTCTTTCTTTCTTTCTTTGGTGGTCTTGAGGAGCTTTGGAAGTTGGAACCTCTGG  
CTGCACTC

CTTTCCTCTTCTTCGCAGTGGCTGTCTCAGAATCCTCATGATCTGCTTCCTTGTACCAGAGTCATCCTCC  
TCAGGGACATGCTCTAGCTCCGACTCCTGACCAACGCTGTTTCCGCCTGGCGAATTCTTAATGTTGCTATC  
GCTGCTGC

TTTATTCTCTTGACTCGTCCATCATAGAGCTTTATAGAAATGTGAGAGAAGGCTTCTGAAGAGAGACCCAT  
ACGGCTGGCCGTTCTGGGGGGCACTTCTACCGGAAAGACCTCCCTGGTATCTAGGCTTACTGTTAATATCG  
TCCACGAG

AGACGTACTCAAATGTCTCAGAACGTTTACATTGTATCGACTGCCAGAACCCCAATTGGTTCATTCCAGG  
GTTCTCTATCCTCCAAGACAGCAGTGAATTGGGTGCTGTTGCTTTAAAAGGCGCCTTGGCTAAGGTTCCA  
GAATTGGA

GCCTCTTGCAGCGCTCCAGTCGATATCAACTTCTTCTTTCTTTCTTTCTTTGGTGGTCTGGAAGAGCCTTGG  
AATTGGAACCTCTTGCAGCAGTCCAGTCAATATCAACTTCTTCTTTCTTTCTTTGGACCTCTGAAGTTA  
GAACCTCT

CTTCGCAGTGGCTGTCTCAGAATCCTCATGATCTGCTTCCTTGTACCAGAGTCATCCTCCTCAGGGACAT  
GCTCTAGCTCCGACTCCTGACCAACGCTGTTTCCGCCTGGCGAATTCTTAATGTTGCTATCGCTGCTGCC  
TTAGCATT

GTTGGGGATTTAATTTCTCGTTTTAGGATCTGATGCTTATGTTGTTTCAAGATCAATGACCCAGAAGGTCTC  
GGATGGGGTCAAAGCCCTAATTTGTGGGGTGTGGCGTGGGGATGATGTGTTCTTTGTACCTCAACTAT  
CAATATTG

CCAAGATGCTTTGACAGCTTCCACTGAAAACGGTGTCAAGTTGAGACAAACCGATAGACTGTTGGATGGTG  
TTGCTGATGGCTCCATGAGATCCAAGGCCGACAGGATGGCCAAGATGGAAAGAAGAGAAAGAAATAGACAT  
GCCAAGCA

CAAGCCAGGTATGTTTGTACTTTTTGCCCCAGCTGGTGTACCCTGAAGTCAAGTCCGTTGAAATGCATC  
ACGAACAATTGGAACAAGGTGTTCCAGGTGACAACGTTGGTTTTCAACGTCAAGAACGTTTCCGTTAAGGAA  
ATCAGAAG

TTCTTGATCTGCTGTACGTTTCAAGTACATAAAGGATTGTGATGCATATGTGTGTGGCTGTGACTATGAGT  
ATGTTGCAACAACGACTTACAGAGGAAGCCTTGCCTTCTTTCTTTCTTTCACTTTTATTCTGTCTGGAAT  
TCGATCCA

CAACACCATGTCCGCTTGGGTTAATATGTTGTTGATTTCTCATCTGGTCCAATCAAGACACCTGTTGGTG  
CCTGTGCCACATCCGTGGAATCTGTTGACATTGGTGTAGAAACCATCTTGTCTGGTAAGGCTAGAATCTGT  
ATTGTCGG

GAAGATGCAACTTTCATGGAAGGATATCCCTACTGTCGCTCCAGCAAATGATTTGCTGGATATTGTCTTGA  
ACAGAACCCAGAGAAAGACACCAACTGTGATCAGACCTGGTTTTCAAGATTACAAGAATCAGAGCGTTCTAT  
ATGCGTAA

ACAGGTGGAGCAGGCACAAGAACCGCCGCATGCGCCCTCCATGTCCAGGTTGTGACCTTGGAGCGATGTCCA  
GGATGGTTTTCGCCCTCACAGACTTTCGTACGTCTTCTGGGAGCCATCCTTCAAGAATAAAAGTTATCTTCAGT  
TCTTCGCC

CAAATCAATGAACACTCTCAAGATAGAGTTGAGTCTTCTGATATCCAGGAAGCCTTGTCAAGATTGCAACA  
AGAGGACAAGGTCAATTGTCTTGGCGAGGGTGTAAAGGAGATCAGTTCGCCTGAATAACCGTGTCTGATGCT  
GTCTACTA



AACATCCCCTCTTTCATGGTCAGATTGGACTCTGAGAAGCACATTGACTTTGCTCCAACATCTCCATTCCG  
TGGTGCTAGACCAGGCAGAGTTGCTAGAAAGAAATGCTGCAAGGAAGGCGGAAGCTTCTGGTGAAGCTGCTG  
ATGAAGCT

TTTGGTTTGGTTGAGGCTTACCAAAGTGGAGCACCTCTGGCAGCACCCCAATCCAAAGCTGGTTCTTCCTTTT  
CTCTTTCTCTTCTTGGTGGTCTTGGAGGAGCTTTGGAAGTTGGAACCTCTGGCTGCACTCCAGTCAATATCT  
GGCTCTTC

ATATCAGAGTCCGCTGAGGATGAATCAGTAAATGTATTACCTGACTCAGGTGATGGAGTGCTCAGAGGCGT  
TCCAAGTATGATGGATACTGCGGAAACTGTGATTGTGGCCAGGTGGAAAGTACATAGGCGACATTTGAT  
AAGGTGTA

AGAATCAGAATGAGTATGAGTATGATTTGTTGATTTAGTGTGATGAGAGTGCTCCAAATCACCTTTAGAGT  
CAGAGTTACATCAACAAACTCGACGTCCACCTTCCCACGTTTGGCACCTTCATACGTAAATCCTCTCTTA  
TAGTCGAA

TTACCTTCTTTTGGAAAGGTTTAGTAGTCGTATCTCTTTCAATGATTCCGCCTGTATCCTCCAGACGCTCTT  
CCTCAAGGGTACCTGATCTCTTCTTTCCACCAACGGTCTTCACATAACTCAAATGACTTCGTCTTTAAC  
TGTTTACC

CTAAGCAGGTTATCAGACAGAGAGTTTGGCCACAGGTAAATTCAGTTTGTTCCTCCTGGGGTGAAGGTGCGA  
AAAAGTACACCAAAGCAAGAGGAAGAGTTGAAGGCCAAGACCATTGCAAAATATGAAGCTCTAGACAAGG  
ATCCTAAA

ATAGTAATAATGCGGGGGGAAGACGAAACAGACCGTGTGTGGTGTGGGTGGGATTTCTGTGGGAGCACGTG  
GCGAGCAGAGGAAGAGCCTCACACAATGCTGCGTCTTCATAAAGGGATCAAAGCAAATAGATAATCGAT  
TCCAAAGA

ATTGGCTTCTAGAATTGAGAATAAGTTGAAATCTCAGTCTAGAATCAACAATGTTCTGAACAAGATTCATG  
TTGCTCAACCTCAAGCAAGAGATGATGTCAAGAGAACACCATTTATCCCAGAATCTGTCAAGAATTTGAAG  
AAATACGA

ATTATCAACAACAGCAGTCAAACACCGGTAACACTACAACACTACCACATCCACAACAACACTGCGACATCTTCTCC  
TGGGAAATTTCTCCTCTTCTCCGAACTCCTCTGTACTGGAGAACAACAGATTAAACAGTATCAACAATTCAA  
ATCAATAT

GCAAATTTGTCAACATCCCCTCTTTCATGGTCAGATTGGACTCTGAGAAGCACATTGACTTTGCTCCAACAT  
CTCCATTCGGTGGTGCTAGACCAGGCAGAGTTGCTAGAAAGAAATGCTGCAAGGAAGGCGGAAGCTTCTGGT  
GAAGCTGC

ATAACTCACAAGGACCCAGAATCAGCCAGAACAAGAAGGACAAAAGTGATCAAGACATAGGGAAACGCCAA  
CCACAATTTCAACAGCAGCAGCAGCCCCAACAGCAGCAGCAGCAGCAACAGCAACAGAGACAACACCA  
GGTCCAGA

TTCTTTTCCAGACAATCTCTTAGCCAACAATTGAGCGTATTCGGCAGCAGCTTCTCTTTGAGCTTGAGCGTTT  
CTGACCTTCAAAGCTCTTTGGTGTCTCTTTCTTTGCAATCTTTGAGGAGTAACCAATCTTTGGATCTTTGG  
AGCCTTGG

TGTAGGTATTTTTGGTTTGGTTGAGGCTTACCAAAGTGGAGCACCTCTGGCAGCACCCCAATCCAAAGCTGGT  
TCTTCTTTTCTCTTTCTTCTTGGTGGTCTTGGAGGAGCTTTGGAAGTTGGAACCTCTGGCTGCACTCCA  
GTCAATAT

GTAATTTGTCAATTCGTGCCATTATTCTCTCCGAAAGTTTGTGAATGTGAGGATAATGGTGAGTTTCAATTTGT  
GGCTGAGAGCTTACAACAGGTGGTGGAGATCTCACTGGAGAGTCTCCGTAGTTTACACTATATAGTGCCAT  
ATCTTCGA

AGCCAAGTCTGTCCACCATGCAAGAGTTTTAATCACTCAAAGGCACATTGCTGTTGGTAAGCAAATTGTCA  
ACATCCCCTCTTTTCATGGTCAGATTGGACTCTGAGAAGCACATTGACTTTGCTCCAACATCTCCATTCCGGT  
GGTGCTAG

AGGTTCGATTCTTTGCATAAGAGGCTACTGACCGAAGTTAATGAGGAGCAAGCAAGTCACTTAAGGCACTCC  
CTGGACAACCTTCGTCGCACAAGCCACGGACTTGCAGTTCAAACCTGAAAAATGAGATTAAGGTGCCCAAAG  
GGATGGGA

GTCCACCATGCAAGAGTTTTAATCACTCAAAGGCACATTGCTGTTGGTAAGCAAATTGTCAACATCCCCTC  
TTTCATGGTCAGATTGGACTCTGAGAAGCACATTGACTTTGCTCCAACATCTCCATTCCGGTGGTGCTAGAC  
CAGGCAGA

CAGATTGGACTCTGAGAAGCACATTGACTTTGCTCCAACATCTCCATTCCGGTGGTGCTAGACCAGGCAGAG  
TTGCTAGAAGAAATGCTGCAAGGAAGGCGGAAGCTTCTGGTGAAGCTGCTGATGAAGCTGATGAGGCCGAT  
GAAGAATA

ACGTCAGGACTAGTGCAGACTACCACTGAAAGTACCAACTCCAGCACTAATGCTACTACCACTGCCAGCACC  
AACGTCAGGACTAGTGCTACTACCACTGCCAGCATCAACGTCAGGACTAGTGCAGACTACCACTGAAAGTAC  
CAACTCCA

CGATGACGTGACAGGTGGAGCAGGCACAAGAACCGCCGCATGCGCCCTCCATGTCCAGGTTGTGACCTTGA  
GCGATGTCCAGGATGGTTTTCGCCCTCACAGACTTCGTACGTCTTCTGGGAGCCATCCTTCAGAATAAAAGT  
TATCTTCA

TAGTGCAGACTACCACTGAAAGTACCAACTCCAGCACTAATGCTACTACCACTGCCAGCACCAACGTCAGGA  
CTAGTGCTACTACCACTGCCAGCATCAACGTCAGGACTAGTGCAGACTACCACTGAAAGTACCAACTCCAAC  
ACTAGTGC

CCATCAGTAGAATTCGTTATGCTATCCTCTTCATCTGAAGATGGCTCGAAGACTCCTTCATTGTGTTTGGC  
GGAGCTACTTTGCTGCAGTTGTGTTGCTTGTATGACTCCCAGTAGAATGATGCTCTGTATACGCAAGTACCA  
AACTTGCG

GATGTCTTGGACCAAGAACCGGACGCAGGTTTAGGTAATGGTGGTCTAGGTCGTCTTGCAGCTTGCTTCGT  
CGACTCAATGGCAACGGAAGGCATCCCTGCCTGGGGTTATGGTCTACGTTATGAGTATGGTATCTTTGCTC  
AAAAGATT

CCCAATCAAAGCATCTCTTTCCATTTACCGACACGAATACCACCATGTCTCTTTCTACCTTTGACAGGCT  
GCATAGTCAAACATTTACAGGACCAGTGAACGAACCTTGGAACTTGTCAATTGACCATATGACGTAATCTT  
TGGTAGTA

GTCTTCTTGGAAAGACATGTAGGAGGACATGGAAGAGTCTCTCAAGGCTTGAGCCTTCATGATTCTTTCCAT  
GTTAGCAGACCAACCAAATTGACCAGTTCTGATAGCAGCTGGGGCATCCAACAATTTGTAAGAAACAACAA  
CTTTCTCC

CGATATCAACTTCTTCTCTTTCTTCTTGGTGGTCTGGAAGAGCCTTGGAAATTGGAACCTCTTGCAGCA  
GTCCAGTCAATATCAACTTCTTCTCTTTCTTCTTGGACCTCTGAAGTTAGAACCCTTAGCGGCACCCCA  
ATCAAGAT

GGTGTTCATAAACGTTGGTCAATTGCGTTGGCCTTTTAAGCATGAGCTCCAACGGTCCAGAGCCCATCTGCA  
GTTGACAGGGCCTGAAGAAAAGATTCATGACAGTCATGTTCTTGGTGAGGGTGCCTTGGGTGTAACACTTA  
TCCTTACA

TTTATATACATCCTTAAACTGTGAAAGAAAGAATAGCGATACAAATGTCTAGGCAGTCCCTAGGACAGTGC  
CGGAGTTGTCAATTGTGGAGAGGCAATGGTGTCTGTGGACATTAACGGTTCGTAATCTTTAGTTCTGTGC  
ATATCCTC

GAGAGTAAATCAAACACACGTAGAAAACAAGTAGCAACTAGAACAGGTTTCAGTGACAGAGAAGTACAAAGGT  
CTCAACAGACAAGCCCTCATCATTTTACCCATACTGACACCTTGCCTTCCTGCTCAGTCATAATCTTGGG  
ATTACCAG

GCCAGGATTCTTCTTGATCTGCTGTACGTTTCAGTGACAATAAAGGATTGTCATGCATATGTGTGTGGCTGT  
GACTATGAGTATGTTGCAACAACGACTTCACAGAGGAAGCCTTGCCTTCCTTCTTTCCTTCACTTTTCATT  
TGTCTGGA

CTTTCATGGTCAGATTGGACTCTGAGAAGCACATTGACTTTGCTCCAACATCTCCATTTCGGTGGTGCTAGA  
CCAGGCAGAGTTGCTAGAAAGAAATGCTGCAAGGAAGGCGGAAGCTTCTGGTGAAGCTGCTGATGAAGCTGA  
TGAGGCCG

ACTGCTCGTACCATCAGTAGAATTCGTTATGCTATCCTCTTTCATCTGAAGATGGCTCGAAGACTCCTTCAT  
TGTGTTTTGGCGGAGCTACTTGCTGCAGTTGTGTTGCTTGTATGACTCCCAGTAGAATGATGCTCTGTATAC  
GCAAGTAC

TTCTTGGTGGTCTTGAGGAGCTTTGGAAGTTGGAACCTCTGGCTGCACTCCAGTCAATATCTGGCTCTTCT  
CTTTCTCTTCTTGGTGGCCTCGAGGAGCTTTGAAAGTTAGAGCCTCTAGCTGCACTCCAGTCAATATCTGG  
CTCTTCTC

TTGACAGCTTCCACTGAAAACGGTGTCAAGTTGAGACAAACCGATAGACTGTTGGATGGTGTGCTGATGG  
CTCCATGAGATCCAAGGCCGACAGGATGGCCAAGATGGAAAGAAGAGAAAGAAATAGACATGCCAAGCAAG  
GTGAATCT

AGCTAGGTTTAGCCAAGTCTGTCCACCATGCAAGAGTTTTAATCACTCAAAGGCACATTGCTGTTGGTAAG  
CAAATTGTCAACATCCCCTCTTTTCATGGTCAGATTGGACTCTGAGAAGCACATTGACTTTGCTCCAACATC  
TCCATTTCG

AGAGTTGAAACCGGTGTCATCAAGCCAGGTATGGTTGTTACTTTTTGCCCCAGCTGGTGTACCCTGAAGT  
CAAGTCCGTTGAAATGCATCACGAACAATTGGAACAAGGTGTTCCAGGTGACAACGTTGGTTTTCAACGTCA  
AGAACGTT

GAAGCCACCAAGGGAATGATCACCAACTTGCAAAGAAATGTGGATCGCTTGTACAAGCTGAACGTGAGAAG  
CAACGATCCTCAATCCAGCTTGTCTAAGGTGGACATTCCCTTGAAGTTGTTCAATACATTGAGGACGGTA  
GAAATCCA

ATAAGTTGAAATCTCAGTCTAGAATCAACAATGTTCTGAACAAGATTCATGTTGCTCAACCTCAAGCAAGA  
GATGATGTCAAGAGAACACCATTTATCCCAGAATCTGTCAAGAATTTGAAGAAATACGACCCTGAAGATCC  
AAACAGGA

CCACTGAAAACGGTGTCAAGTTGAGACAAACCGATAGACTGTTGGATGGTGTGCTGATGGCTCCATGAGA  
TCCAAGGCCGACAGGATGGCCAAGATGGAAAGAAGAGAAAGAAATAGACATGCCAAGCAAGGTGAATCTGA  
TAGACACA

GTTCCGATGAAATCTTCGGTGGTTATCTATATTTTCGCACAAGCTCCTTCTGCGGCAGAATTTACACTGAA  
TCCGTGCAACGTGTCAAGAACTTGCATTTGGCAGATTGTTTGAGAGCTAACAAGTCTACGATGGCTTGGGG  
TCTAGAAG

CAAGTTAGAGGATGTCTTGGACCAAGAACCGGACGCAGGTTTAGGTAATGGTGGTCTAGGTCGTCTTGCAG  
CTTGCTTCGTGCACTCAATGGCAACGGAAGGCATCCCTGCCTGGGGTTATGGTCTACGTTATGAGTATGGT  
ATCTTTGC

AGAAGGTAAATGAAGATTCTCCATCATCTTCTTCAAACCTAGCTGAACGACCTCGTCTTCAAACAACGAC  
TCCACTACTAGCATGCCTGAAAGTCCCACCGAGGTAGCTGGTGATGATGTTGATAGGGAGAAACCGCCAGA  
GTCAAGTA

ATGGTTGTTACTTTTTGCCCCAGCTGGTGTACCCTGAAGTCAAGTCCGTTGAAATGCATCACGAACAATT  
GGAACAAGGTGTTCCAGGTGACAACGTTGGTTTTCAACGTCAAGAACGTTTCCGTTAAGGAAATCAGAAGAG  
GTAACGTC

TGAATCTTCAGTATGAGTTGACGGAGGTGTGGAATCGGTTGGACTCACAGCTTTTGAAAGGACATTTCTCG  
GTTGCTCAGGATGTAGTTCAATGTCAGATTGGAAGTCATGGTCAGATTCTATGTTAAGATCATTGGATTCT  
TGGATCTC

ATCAGAGTCTGCTGAGGATGAATCAGTAAATGTATTACCTGACTCAGGTGATGGAGTGCTCAGAGGCGTTC  
CAACTGATGATGGATACTGCGGAAACTGTGATTGTGGCCAGGTGGAAAGTACATAGGCGACATTTGATAA  
GGTGTATA

ACTGCTGTGGGTACGGCCCATTCTGTGGTGAATGTGACTGAGCAGTTTGAGGAGAGGCATGATGGGGGTTTC  
TCTGGAACAGCTGATGAAGCAGGTGTTGTTGTCTGTTGAGAGTTAGCCTTAGTGGAAGCCTTCTCACATTC  
TTCTGTTT

TGCTCACGGGACATATCTTTACATGCGTTGTAAGTATTGGAAGCAAAGTGACACCACACCTCTTCCACGTG  
TTATTCGTGGTGGATGTTACAGTTTCAGGGTCAGCCGTGAAGCTTTCTAAATTGAACGTTTCTCGAGAAA  
GCTGTTCT

GTCATCATGCACTGCTGTGGGTACGGCCCATTCTGTGGTGAATGTGACTGAGCAGTTTGAGGAGAGGCATG  
ATGGGGGTTCTCTGGAACAGCTGATGAAGCAGGTGTTGTTGTCTGTTGAGAGTTAGCCTTAGTGGAAGCCT  
TCTCACAT

TTAACTAGCTTTGGGGGAGAGCCATGGAAAATAGCACTCGGTCTTGTGGCGGAGTTGGATTTGCTTGACTG  
TGGCCCCCTCACGCTGTTTAATGACGACGAGAGGCAGCAATGATGTTGTTTCAATTTCTTCGACCTTAGCCTT  
GGCTCTGG

AGGGAATGATCACCAACTTGCAAAGAAATGTGGATCGCTTGTACAAGCTGAACGTGAGAAGCAACGATCCT  
CAATCCAGCTTGTCTAAGGTGGACATTCCTTGGAAAGTTGTTCAATACATTGAGGACGGTAGAAATCCAGA  
TATTTACA

CTCCTATACCGAAGATGCAACTTTCATGGAAGGATATCCCTACTGTGCTCCAGCAAATGATTTGCTGGAT  
ATTGTCTTGAACAGAACCAGAGAAAGACACCAACTGTGATCAGACCTGGTTTCAAGATTACAAGAATCAG  
AGCGTTCT

TGGCAGATAATAGTTGTTGCTGGTCCATTGGAGTTTGAGAAGGTGGTTGAGGAGGCGGACCAGCCTGATAA  
CGACCATAACCCTTGGAGAAATTTGTTGTTGTGGAGGTGGTGGTGAATAGAAGTCTGGTAGCGACCGTAGCT  
CTGATTCA

GTTGAACGAATAATGGAATATCCGACTTAAGACTTTGGGCCACAGACTTCACGGTGCTCACGCTACTTGCA  
TGAGGTCTTCTAAGTGTCTTCAACGAACCTTGGGGTGTGAGCTAAATGTATTCAAGGTATTGGTTGAATG  
GATGGATG

CGTTACTCACACTGCTCGTACCATCAGTAGAATTCGTTATGCTATCCTCTTCATCTGAAGATGGCTCGAAG  
ACTCCTTCATTGTGTTTGGCGGAGCTACTTGCTGCAGTTGTGTTGCTTGTATGACTCCAGTAGAATGATG  
CTCTGTAT

TCCAGCACTAATGCTACTACCACTGCCAGCACCAACGTGAGGACTAGTGCTACTACCACTGCCAGCATCAA  
CGTCAGGACTAGTGCGACTACCACTGAAAGTACCAACTCCAGCACTAATGCTACTACCACTGCCAGCACCA  
ACGTCAGG

CAGCACTAATGCTACTACCACTGCCAGCACCAACGTGAGGACTAGTGCTACTACCACTGCCAGCATCAACG  
TCAGGACTAGTGCGACTACCACTGAAAGTACCAACTCCAACACTAGTGCTACTACCACCGAAAGTACCGAC  
TCCAACAC

GTTTGGTAGGGATCTGAAGTGTGCTAAAGTTTCAATAGGTTGATGTGTTGGACCATCTTCACCGACACCGA  
TAGAGTCATGTGTAGCAACCCAAATAACTGGGTGGCCAGACAAAGCGGACAATCTAACGGCACCAGCAGCA  
TAAGAAAC

GTTAAACGTGGAACAAGCTATATCACATCCGTTCCCTAAACGAGGTGCGGAAGCCAGACGACGAGCCTGTTT  
GCCTTCAGGGTCTTTTCGACTTCACCTATGAATCCGAGTTGAATTC AATGTCCAAATTAAGAGACTACTTG  
GTTGAAGA

GCCTTTGAGAAATCTAACTGAAACGCACAACCTTTAGTAGCACAAACCTGGACACAGATGGTACAGGCGACG  
ATCATGATGGTGCTCCTCTTTCTCATCTCCTTCTTTTGGACAACAAAATGACAATAGCACCAACGATAAT  
GCTGGTCT

TTCGTGGTGGTGGGTTGTCCATTAGTGATATTGCTCAAGGTAAGTCTCAGAATGCACCTTCAGATGGCACC  
GGCTCATCCACTCCACAACATCATGACGAAGACGAAGATGAATTATCTCGTCAAATCAAGGCGGCTGCCTC  
TACCTTAG

CATGGCCTACAGATGAAATATGTGCTCAACTAATGACACAATTTCCACCAGGAACGCCGACCAGTGTCCTG  
CTGCAGACTATTTTCAGATGAGCTAGAGAAAAGTTCTGACAACCTGTTTCACGTTATCTGATTTAAAGAGCAA  
ACTGAAAG

AGCATCAGCAACAACAACAACAACAACAGCAACAGCAGCAACAGCAACAGCAACAGCAGCAGCAACAACAA  
CAGCAACAACAACAACAACAACAGCAGCAGCAGCAGCAGCAGCAAGGACAAATACCGCAATCTCAGCAAGT  
TCCTCAAG

GCAACAACAACAGCAGCAGCAGCATCAGCAACAACAACAACAACAACAGCAACAGCAGCAACAGCAACAGC  
AACAGCAGCAGCAACAACAACAGCAACAACAACAACAACAGCAGCAGCAGCAGCAGCAGCAAGGACAA  
ATACCGCA

CAGCAGCAGCAGCATCAGCAACAACAACAACAACAACAGCAACAGCAGCAACAGCAACAGCAACAGCAGCA  
GCAACAACAACAGCAACAACAACAACAACAGCAGCAGCAGCAGCAGCAGCAAGGACAAATACCGCAAT  
CTCAGCAA

TCATGTGCAAATACAACAGCAGCAACAACAACAACAACAACAGCAGCAGCAGCATCAGCAACAACAACAAC  
ACAACAGCAACAGCAGCAACAGCAACAGCAACAGCAGCAGCAACAACAACAGCAACAACAACAACAACAG  
CAGCAGCA

AGCAACAACAACAACAACAACAACAGCAGCAGCAGCATCAGCAACAACAACAACAACAACAACAGCAACAGCAGCAA  
CAGCAACAGCAACAGCAGCAGCAACAACAACAACAACAACAACAACAGCAGCAGCAGCAGCAGCAGCA  
GCAAGGAC

GTCATCATTGGCATCGTAGTCCCAAGCAGGACATGAGTTACAAGCACTCAAAGTGTTGGCACCAGCGGATT  
CAGCTTCACTGACAGTCTGCAAGGTGATGTTGAATTGGTTCACCTAAACCATCAATGAAATATTGAGCAGTG  
TCATGACA

AGTTTAGGCATCATGTGCAAATACAACAGCAGCAACAACAACAACAACAACAGCAGCAGCAGCATCAGCAA  
CAACAACAACAACAACAGCAACAGCAGCAACAGCAACAGCAACAGCAGCAGCAACAACAACAACAACAACA  
ACAACAAC

ATACAACAGCAGCAACAACAACAACAACAACAGCAGCAGCAGCATCAGCAACAACAACAACAACAACAACAGCA  
ACAGCAGCAACAGCAACAGCAACAGCAGCAGCAACAACAACAACAACAACAACAACAGCAGCAGCAGCAG  
AGCAGCAG

GTGTCGTATTCAATTTACAATGTCATCATTGGCATCGTAGTCCCAAGCAGGACATGAGTTACAAGCACTCAA  
AGTGTTGGCACCAGCGGATTCAGCTTCACTGACAGTCTGCAAGGTGATGTTGAATTGGTTCACCTAAACCAT  
CAATGAAA

ACAACAACAACAACAACAGCAACAGCAGCAACAGCAACAGCAACAGCAGCAGCAACAACAACAGCAACAAC  
ACAACAACAGCAGCAGCAGCAGCAGCAGCAGCAAGGACAAATACCGCAATCTCAGCAAGTTCCTCAAGTT  
AGATCCAT

CCGACCAACTCATTGACCACAGATCTTAAATATTGGTACTCTTCCACATCTCCACGACTTGGCACTGCAAC  
CTGTACCAGAACAACCTTGCCCCTCCATTCTGGATGCTCGTTTCAGAAACTTCCATGGCGTGCAACTTCT  
GAGGCACA

TAATTGCTGCTGCTGTTGTTGTTGTTGTTGTTGTTGTTGTTGTTGTTGTTGTTGTTGTTGTTGTTGTTGTT  
GTTGCTGTTGTTGTTGTTGTTGTTGTTGTTGTTGTTGTTGTTGTTGTTGTTGTTGTTGTTGTTGTTGTT  
TGCGCTTG

CAGCAACAACAGTTT TAGGCATCATGTGCAAATACAACAGCAGCAACAAAAGCAACAACAACAGCAGCAGCA  
GCATCAGCAACAACAACAACAACAACAGCAACAGCAGCAACAGCAACAGCAACAGCAGCAGCAACAACAAC  
AGCAACAA

CTTCCACATCTCCACGACTTGGCACTGCAACCTGTACCAGAACAACCTTGCCCCTCCATTCTGGATGCTCG  
TTCAGAAACTTCCATGGCGTGCAACTTCTGAGGCACACCTTTGATGTAATCCAGCCTGTGACACCAAC  
TATGATCT

CATTTACAATGTCATCATTGGCATCGTAGTCCCAAGCAGGACATGAGTTACAAGCACTCAAAGTGTGGCA  
CCAGCGGATT CAGCTTCACTGACAGTCTGCAAGGTGATGTTGAATTGGT CACCTAAACCATCAATGAAATA  
TTGAGCAG

TATTGGTACTCTTCCACATCTCCACGACTTGGCACTGCAACCTGTACCAGAACAACCTTGCCCCTCCATTC  
TGGATGCTCGTTTCAGAAACTTCCATGGCGTGCAACTTCTGAGGCACACCTTTGATGTAATCCAGCCTGT  
CGACACCA

CATTGACCACAGATCTTAAATATTGGTACTCTTCCACATCTCCACGACTTGGCACTGCAACCTGTACCAGA  
ACAACCTTGCCCCTCCATTCTGGATGCTCGTTTCAGAAACTTCCATGGCGTGCAACTTCTGAGGCACACC  
TTTGATGT

AACAGCAGCAACAGCAACAGCAACAGCAGCAGCAACAACAACAGCAACAACAACAACAACAGCAGCAGCAG  
CAGCAGCAGCAGCAAGGACAAATACCGCAATCTCAGCAAGTTCCTCAAGTTAGATCCATGAGTGGACAACC  
TCCCACCA

CTCCCTAGTTTTGCGATAGTGTAGATACCGTCCTTGGATAGAGCACTGGAGATGGCTGGCTTTAATCTGCTG  
GAGTACCATGGAACACCGGTGATCATTCTGGTCACTTGGTCTGGGGCAATACCAGTCAACATGGTGGTGAA  
GTCACCGT

CAGCAGGGATATAACCAGCAGGGATATAACCAACAAGGCCATCAACAACCAGTCTACGTCCAACAACAACC  
ACCCAGAGGGGTAACGAAGGTTGTCTGGCTGCATGTCTGGCTGCATTATGTATATGCTGCACCATGGATA  
TGCTATTC

AGATCTTAAATATTGGTACTCTTCCACATCTCCACGACTTGGCACTGCAACCTGTACCAGAACAACCTTGC  
CCCTCCATTCTGGATGCTCGTTTCAGAAACTTCCATGGCGTGCAACTTCTGAGGCACACCTTTGATGTAA  
TCCAGCCT

CAACAACAGCAACAGCAGCAACAGCAACAGCAGCAGCAACAACAACAGCAACAACAACAACAACAACA  
GCAGCAGCAGCAGCAGCAGCAGCAAGGACAAATACCGCAATCTCAGCAAGTTCCTCAAGTTAGATCCATGA  
GTGGACAA

TTGTTGTTGTTGTTGTTGTTGTTGTTGTTGTTGTTGTTGTTGTTGTTGTTGTTGTTGTTGTTGTTGTT  
GCGCCTGTGCTTGTGCTTGTGCTTGTGCTTGTGCTTGTGCTTGTGCTTGTGCTTGTGCTTGTGCTTGTGCT  
TGTGCTTG

GGGCTACAATCAGCAGGGATATAACCAGCAGGGATATAACCAACAAGGCCATCAACAACCAGTCTACGTCC  
AACACAACCACCCAGAGGGTAACGAAGGTTGTCTGGCTGCATGTCTGGCTGCATTATGTATATGCTGC  
ACCATGGA

CAAACA ACTCAAGATCCGTTAGACATTTAGCTTCCAAAACAGAAGAATGTGAGAAGGTTTTCCACTCAGGC  
TAATTCTCAACAGCCAACAACACCTCCCTCATCTGCTGTTCCAGAGAACCATCATCATGCCTCTCCTCAA  
CTGCTCAA

AAGATCCGTTAGACATTTAGCTTCCAAAACAGAAGAATGTGAGAAGGTTTTCCACTCAGGCTAATTCTCAA  
CAGCCAACAACACCTCCCTCATCTGCTGTTCCAGAGAACCATCATCATGCCTCTCCTCAAGCTGCTCAAGT  
ACCATTGC

GTCATTTGTGGCCTTCGGAATATTTAGCTTTAAATATGGCTTCCCTGAGAGCTTTCTCTATTGCTGTTCA  
GTTGGTGCAGGTGATGGACCATCGCCTGCACTGGAGCTGGACCTTCCAAAGTATTTGATATAGCAACTGTC  
GGGTGTAT

TTGAGATAACACCAGCACCTGCGACACCTCTTAAGATGTTAGCACCACAACCTTGAATAGAGAACCAACA  
CCTTCAGCAGCAACAATCTTCTCAACAGTCAAAGGCACCGTCGTACTTAACAGCTTGACCGGAGGTAT  
CATCATTC

ATCTGGTTATGTGCTTTCATTTGGTAATCACTGGGATGTTACTGGGGCAGCAGCAACTCCGTGTGTACCCC  
TAACTCCGTGTGTACCCCTAAGAACCTTGCCTGTCAAGGTGCATTGTTGGATCGGAATAGTAACCGTCTT  
TACATGAA

AAACCGGTGTCAAGCCAGGTATGGTTGTTACTTTCGCCCCAGCTGGTGTACCCTGAAGTCAAGTCC  
GTTGAAATGCATCACGAACAATTGGAACAAGGTGTTCCAGGTGACAACGTTGGTTTCAACGTCAAGAAGCT  
TTCCGTTA

GCATCGTAGTCCCAAGCAGGACATGAGTTACAAGCACTCAAAGTGTGGCCACCAGCGGATTCAGCTTCACT  
GACAGTCTGCAAGGTGATGTTGAATTGGTACCTAAACCATCAATGAAATATTGAGCAGTGTATGACATC  
TCTTAGAA

GTTGTTGTTGTTGTTGTTGTTGTTGTTGTTGTTGTTGTTGTTGTTGTTGTTGTTGTTGTTGTTGTTGTTGTTG  
TGTGTTGCTGCTTGTGCTTGTGCTTGTGCTTGTGCTTGTGCTTGTGCTTGTGCTTGTGCTTGTGCTTGTGCTT  
TGCTTGTG

AGTACTACAAACATGCAAGATTGCAACCCAGCTATGGAGCTTCAACCATGCAAGGTGAGCCTCCAGTCCG  
TGGACAACCGCCTGTGCCTGTAAGAATGCAGCCACAGCCACCGCAACCAATGCAACAGGGAAACATCTATC  
CGATTGAG

TAACGTTTTAGCTTCCGCTAGCTCTTCTTCTTCTTCTTCTAAGAAGTCTAAGGGTGTGCTCCAGAACTTG  
TTCCAGCCACTTCATTCATGGGTGTCGTTGCTGCTGTTGGCGTTGCTTACTATAAGATTAAGCAACAATT  
TGTGTTTC

TTGTTGTTGTTGTTGCTGTTGTTGTTGTTGTTGTTGTTGTTGTTGTTGTTGTTGTTGTTGTTGTTGTTGTT  
GTGCTTGTGCTTGTGCTTGTGCTTGTGCTTGTGCTTGTGCTTGTGCTTGTGCTTGTGCTTGTGCTTGTGCTT  
TGTGCTTG

CTCAACTGTACTACAATAGCAACGTCAATGCTCACAACAACAACAACAACAGCAACAACAACAACAACAAC  
AACAACAACAGCAACAACAACAACAATCTTTACAACCAGACGCAGTTCTCCACGAGGTACTTCAACTCGAA  
CTCCTCTC

CTACAATAGCAACGTCAATGCTCACAACAACAACAACAACAGCAACAACAACAACAACAACAACAACAACA  
GCAACAACAACAACAATCTTTACAACCAGACGCAGTTCTCCACGAGGTACTTCAACTCGAACTCCTCTCCC  
TCGTTGAC

GTTTCTTATCTGTTTCATTCCAAATATCTTTTATGCTCTCCCCATGGTCCTGCTCCATGCAGTGCCATCAT  
CCGTCACAACACTAGCTTGCGGTTCTGGTCTCCCCAGGTACCACTTCTTTTCTATCCACCAGGTCCTGTACC  
TGATGATC

TGCCTGTGCTTGTGCTTGTGCTTGCCTTGTGCATGTGCTTGTGCTTGTGCTTGTGCCTGTGCTTGCCT  
GTGCTTGTGCTTGTGCTTGCCTTGTGCTTGTGCTTGTGCTTGTGCTTGTGCTTGTGCTTGTGCTTGTGCT  
TGAGCTTG

TCTGCAAGACCAACTAAAGTAGACCCTACCGGTATCTCTACCATTGTTTCTATGGCCTCTCATGTAGATCA  
AACTGAGCATGACCTGGACATCTTGGTCACTGACCAAGGTTTGGCGGATCTAAGAGGTCTATCGCCTAAGG  
AAAGAGCC

TGCATGTGCTTGTGCTTGTGCTTGTGCCTGTGCTTGCCTTGTGCTTGTGCTTGTGCTTGTGCTTGTGCTT  
GTGCTTGTGCTTGTGCTTGTGCTTGTGCTTGTGCTTGTGCTTGTGCTTGTGCTTGTGCTTGTGCTTGTGCTT  
TGAGGGGA

CAAGTAGGTTGTGTCGTATTCATTTACAATGTCATCATTGGCATCGTAGTCCCAAGCAGGACATGAGTTAC  
AAGCACTCAAAGTGTGGCACCAGCGGATTCAGCTTCACTGACAGTCTGCAAGGTGATGTTGAATTGGTCA  
CCTAAACC

GTTGTTGTTGTTGTTGTTGTTGTTGTTGTTGTTGTTGTTGTTGTTGTTGTTGTTGTTGTTGTTGTTGTTGTTG  
GCCTGTGCTTGTGCTTGTGCTTGCCTTGTGCATGTGCTTGTGCTTGTGCTTGTGCTTGTGCTTGTGCTTGTG  
TGCTTGTG

TGTTGCTGTTGTTGTTGTTGTTGTTGTTGTTGTTGTTGTTGTTGTTGTTGTTGTTGTTGTTGTTGTTGTTGTTG  
TTGCGCTTGTGCATGTGCTTGTGCTTGTGCTTGTGCTTGTGCTTGTGCTTGTGCTTGTGCTTGTGCTTGTGCT  
CTTGTGCT

TTTTAGGAAACCATAACCCATATCTGAAAGTGGACGACAAGTGTGGTGTGACTCCATCCCGGTTGATCCTG  
AAAAGGTTGTTGCGATTGTGGAGTCCACCATGAGGGACCAGGTCCCACCAAATACGCCCTCTGACGACATG  
TCCAGGGC

CGGAGATGAAGAACCACCTTGTCAATAGACTTGTCAATTGGAGCATCTGCCTTTGGAGAAGCTGGTGGGATG  
GCATCAGAGGCAGCCTTGGAGTAGGTTGGGGTGTGAGGCAAAGTAACATTGGTCAAATCAATACCCTTGCT  
GTCAGAAG

ATCGAACAGCCGAGCGGTGGCATCAGTAGTTTTCGGTAGTAGCCGTTGGTCTTGCAGGCATGGCAGGAGGA  
GGGCCCTCTTCATCCTCATCTGGAGCTTGGTCTTCTTTACTTTGCATCATAACGAGCTCTATCATTGTGTTG  
AGGAGGTG

CTTGTGCTTGTGCCTGTGCTTGTGCTTGTGCTTGTGCTTGTGCTTGTGCTTGTGCTTGTGCTTGTGCTTGTG  
GCTTGCCTTGTGCTTGTGCTTGTGCTTGTGCTTGTGCTTGTGCTTGTGCTTGTGCTTGTGCTTGTGCTTGTG  
AGCTTGTG

ACAGCAACAGCAACAGCAGCAGCAACAACAACAGCAACAACAACAACAACAGCAGCAGCAGCAGCAGCAGC  
AGCAAGGACAAATACCGCAATCTCAGCAAGTTCCTCAAGTTAGATCCATGAGTGGACAACCTCCCACCAAT  
GTTAGCC

AGACATTTAGCTTCCAAAACAGAAGAATGTGAGAAGGTTTCCACTCAGGCTAATTCTCAACAGCCAACAA  
CACCTCCCTCATCTGCTGTTCCAGAGAACCATCATCATGCCTCTCCTCAAGCTGCTCAAGTACCATTGCCA  
CAAAATGG

GTTGATTCTACCGACCAACTCATTGACCACAGATCTTAAATATTGGTACTCTTCCACATCTCCACGACTTG  
GCACTGCAACCTGTACCAGAACAACCTTGCCCTCCATTCTGGATGCTCGTTTCAAGAACTTCCATGGCG  
TGCAACTT







CTCATAAGCTGGGTATGAAATTCATCACCGATTTGGTTATCAACCACTGTTCTACAGAACACGAATGGTTC  
AAAGAGAGCAGATCCTCGAAGACCAATCCGAAGCGTGACTGGTTCTTCTGGAGACCTCTAAAGGTTATGA  
CGCCGAAG

AATCGATCGTGGTTTTCTTTGCTTCTCAACTTCACCGTTGATGAGCCTGTCCAGCCCCTTGGTTTCTGGCTCC  
ATCAGTGAGCTAGTGTACCCACAGAAATCAACTCAACTTGCCGCTGATATTCGTACTTGATTGCATTGAT  
GATGGAAC

ATGCTCAAGCTAACGTTTCAGCTTCCGCTAGCTCTTCTTCTCTTCTTCTAAGAAGTCTAAGGGTGCTGCT  
CCAGAACTTGTTCCAGCCACTTCATTCATGGGTGTCGTTGCTGCTGTTGGCGTTGCTTACTATAAGATTAA  
AGCAACAA

CTGTCATCATGGTGAGATATTCGTTGTTTTCTTACTTGGGAACTGGTGCTGTTGCAACTGTTGCTGCTCCGG  
TTGTCTTTTTCATGTGAGCAGAACTAAAATCTTGGTCTTGGTCAGAATCTCGATTATCCTTCACCATGACGA  
GAATGCGT

GCAACATTGGAAGCTCCATCTTTTTAATGCGCGCAAATTCGCAACAGCTGTATCAGAGCCTCACACCACAA  
CAATTGCAGATGATTCAGCAACGACACCAACAGTTACTGAGGAGTCGTCTACAACAACAACAACAACA  
ACAACAAA

CTTGCGCTTGTGCATGTGCTTGTGCTTGTGCTTGTGCTTGTGCTTGTGCTTGTGCTTGTGCTTGTGCTTGC  
GCTTGTGCTTGTGCTTGTGCTTGTGCTTGTGCTTGTGCTTGTGCTTGTGCTTGTGCTTGTGCTTGTGCTTGC  
AGCTTGTA

CGTTTTGTACAGACCCGCTGTTGTTGTTGTCAAAGTGAAGATTCCTGTTGAGTCTGAGTCAGAGACAAAC  
ATCGGTCTCATCTTCTCCCAAAGTCGAGATGCAGGCACCAAGAGCAGCCACGAAGCAAATACATAAAGGT  
CAGATAGA

CACCAAGAGCTTGAGCGGAGGCAGCACCAGAAACACCATCTGAAGCAGCAAAAGAGATGGAGTTACCGAAA  
CAACTCGACCAGACACCAGAACCAGGTCAGTCCCCCTTGGTTGTTTCATGAATGTACAGTTGCTAGTAGAGCC  
TGGGACAA

CTTCAAGGTTTTAGCAATGTGAGTACCGTCAATGTTGGAAACGAAGTGGACATCCAAGACACCAGCGTAGT  
GCTTCAAAGCCTCAGTGACCATGACTGGACCCAAATCGGAACCACCAATACCGATGTTAACAACATCGGTG  
ATCTTCTT

TTGCCGCGATGAAGAGGAAGAGGATTCGGTTGTCTTAGAATTGTTTCGTGACATTCTTCACTCCAGCATCA  
CGATGGCGGTGGTGGTGATGATGATGGTGGGGCTGAGTAGCATCTGTAGTAGTAGTAGTAGTAGTATTGTT  
ATTAGATG

GCGACACCTCTTAAGATGTTAGCACCACAACCCTTGAATAGAGAACCAACACCTTCAGCAGCAACAATCTT  
CCTCAAACAGTCAAAGGCACCGTCGTACTTAACAGCTTGACCGGAGGTCATCATCATTCTTCTTCTAACGG  
TATCCAAT

GTCAAGTTGAACGTGATCGGATACTGATTTCTAGAAAACAGGGGGGGCTGGTGTGGTTCTGGCGAAGCCGC  
TTGCTCCGACTGCTTTGATGTCACAGCTTTGGGTTTTCTCCGCTACACTGTCTACCTTAGGATTATTGATCA  
TGACTCAA

AGATTTAAATGAAGCACTAAATTCCTATTATGCTTCTCAAACGGATGACCAAAAGGATAGAAGAGAGGAAG  
CACATTGGAACAGACAGCAGGAGAAGGCCCTCAAGCAAGAAGCCTTCTCCACCAACTCTTCAATAAAGCC  
ATAAATAC

GGTATGGTTGTTACTTTTCGCCCCAGCTGGTGTACCCTGAAGTCAAGTCCGTTGAAATGCATCACGAACA  
ATTGGAACAAGGTGTTCCAGGTGACAACGTTGGTTTTCAACGTCAAGAACGTTTCCGTTAAGGAAATCAGAA  
GAGGTAAC

TCACCGTTAGTGTTAGAAGATGATGACGAAGATGATGAAGCAGCAGCAGCAGAGAAGAGGTGGTTTTAGAGGA  
AGAGATGGAAGACTGGCTTTCACTCGTTTTCAACTGCTTGAGCACTGCTGGACAAAACAGTAGAGTCTTTAG  
TGTAAGAA

ATGTACCTGTAATCGATCGTGGTTTTCTTTGCTTCTCAACTTCACCGTTGATGAGCCTGTCCAGCCCCTTGT  
TTCTGGCTCCATCAGTGAGCTAGTGTACCCACAGAAATCAACTCAACTTGCCGCTGATATTGCTACTTGA  
TTGCATTG

GTTCAGCCTGTCTATGGCCAAGCCATGTCAAGTACTACAAACATGCAAGATTGCAACCCAGCTATGGAGC  
TTCACCCATGCAAGGTGAGCCTCCAGTCGGTGGACAACCCGCTGTGCCTGTAAGAATGCAGCCACAGCCAC  
CGCAACCA

CATCAAGCCAGGTATGGTTGTTACTTTTCGCCCCAGCTGGTGTACCCTGAAGTCAAGTCCGTTGAAATGC  
ATCACGAACAATTGGAACAAGGTGTTCCAGGTGACAACGTTGGTTTTCAACGTCAAGAACGTTTCCGTTAAG  
GAAATCAG

AAAGGCATCACTCCCTAGTTTTGCGATAGTGTAGATACCGTCCTTGGATAGAGCACTGGAGATGGCTGGCTT  
TAATCTGCTGGAGTACCATGGAACACCGGTGATCATTCTGGTCACTTGGTCTGGGGCAATACCAGTCAACA  
TGGTGGTG

GATGCCTCCAATGCTCAAGCTAACGTTTCAGCTTCCGCTAGCTCTTCTTCTCTTCTTCTAAGAAGTCTAA  
GGGTGCTGCTCCAGAACTTGTTCCAGCCACTTCATTATGGGTGTCGTTGCTGCTGTTGGCGTTGCTTACT  
ATAAGATT

CTGAATTTGGAGATTTAAATGAAGCACTAAATTCCTATTATGCTTCTCAAACGGATGACCAAAGGATAGA  
AGAGAGGAAGCACATTGGAACAGACAGCAGGAGAAGGCCCTCAAGCAAGAAGCCTTCTCCACCAACTCTTC  
GAATAAAG

GAACTAAATCTTTGTGGTTAGATAAAGGAACTAAAAGAACCTTTGTTGGAGCAACCAAAGGTGGGAAGGAA  
AGAACACTTCTGGCATTGTCTTCTGGTCTGTTCCAGAAAGAGTGCTCAAAAACGGAGTAGATGATACGGCC  
AATACCGA

CAATGTCATCCAAGTAGGTTGTGTGCTATTCAATTTACAATGTCATCATTGGCATCGTAGTCCCAAGCAGGA  
CATGAGTTACAAGCACTCAAAGTGTGGCACCAGCGGATTCACTTCACTGACAGTCTGCAAGGTGATGTT  
GAATTGGT

AGCAACAACAACAGCAACAACAACAACAACAGCAGCAGCAGCAGCAGCAGCAAGGACAAATACCGCAA  
TCTCAGCAAGTTCTCAAGTTAGATCCATGAGTGGACAACCTCCCACCAATGTTCCAGCCACTATTGGCCA  
ACTTCCTC

CTCACAACAACAACAACAACAGCAACAACAACAACAACAACAACAACAGCAACAACAACAACAATCTT  
TACAACCAGACGCAGTTCTCCACGAGGTACTTCAACTCGAACTCCTCTCCCTCGTTGACTTCTTCCACTTC  
TAATCAT

CCCTACAATCGAAGATCACGTAGCGCACACCGTCCTTGAGATCCTGCCACAGATCCAGCGGAGGTCTGACA  
AATTGCTTCTTTGCAGAGACTTTTCACCTTGCGGAGACTGTTACCTTCCATACTACTAGTATCTAACTC  
TTTCTCTC

ACCAGATTTAATGGTGACATCACCAAGAGCTTGAGCGGAGGCAGCACCAGAAACACCATCTGAAGCAGCAA  
AAGAGATGGAGTTACCGAAACAACCTCGACCAGACACCAGAACCAGGAGTCCCCCTTGGTTGTTTCATGAAT  
GTACAGTT

CTTGTACGAGATCGAACAGCCGAGCGGTGGCATCAGTAGTTTTCGGTAGTAGCCGTTGGTCTTGCAGGCAT  
GGCAGGAGGAGGGCCCTTTCATCTCATCTGGAGCTTGGTCTTCTTTACTTTGCATCATACGAGCTCTAT  
CATTGTGT



ATTCTATTATGCTTCTCAAACGGATGACCAAAAGGATAGAAGAGAGGAAGCACATTGGAACAGACAGCAG  
GAGAAGGCCCTCAAGCAAGAAGCCTTCTCCACCAACTCTTCGAATAAAGCCATAAATACGGAGCACGTTGG  
TGGGTTAT

ATGGTGACATCACCAAGAGCTTGAGCGGAGGCAGCACCAGAAACACCATCTGAAGCAGCAAAAGAGATGGA  
GTTACCGAAACAACCTCGACCAGACACCAGAACCAGGAGTCCCCCTTGGTTGTTTCATGAATGTACAGTTGC  
TAGTAGAG

TTTAACATGGCGCAAATTCCGCAACAGCTGTATCAGAGCCTCACACCACAACAATTGCAGATGATTTCAGCA  
ACGACACCAACAGTTACTGAGGAGTCGTCTACAACAACAACAACAACAACAACAACAACAACAACAACA  
CGCAAACG

CTACTCAAATGCAGATACCGAAATATGAGAACAAGCCATTCAAGCCTCCAAGAAGGGTTGGATCAAATAAG  
TACACACAACCTCAAACCAACCGCCACTGCAGTCACAACAGCCCCTATATCTAAAGCCAAAGTTACTGTCAA  
CTTGAAAA

GTTGATTCTAATGGATGTCTGTCATTCAATTGTGTGGAAAGAGGTACTGCACCGCCTTCTTGCTGGCGTAA  
TGTGTCTGGCAAGGAGGGCACTGCAGATGAAAGAACACTTTTGTCTTGATCTGTAGAGACTTGAGATTTAA  
AGGTATCT

CAACAACAACAGCAACAACAACAACAATCTTTACAACCAGACGCAGTTCTCCACGAGGTACTTCAACTCGA  
ACTCCTCTCCCTCGTTGACTTCTTCCACTTCTAACTCATCCTCTCCATAACAACCAAGCACCTTGAATAC  
ATTTTGCC

GTTTGGCACACAGTGAACAGATTGGTCTATTCTCGTCGCATCTGCGTTTCTTGAATCTGCATGCCAGCAC  
CCAGTAAATGTCTCCCTTGGTGGGGGGCACTTTGGAGGATGACGCTACTTTCTTGCTTCTCTGCTGCCT  
CTTACTAT

AAAGAGATGGAGTTACCGAAACAACCTCGACCAGACACCAGAACCAGGAGTCCCCCTTGGTTGTTTCATGAA  
TGTACAGTTGCTAGTAGAGCCTGGGACAAAGTAGGAACCTCTGGACCAGTCACCGTTAGTGTTAGAAGATG  
ATGACGAA

CATTTTGAATTTGCATTTGCTGTTGGACTTGCAGTTGTTGCTGAACCTGCATCTGCTGCTTGGCTTGCATC  
TGTTGCTTTGCCTGCATCTGTTGTGCCTGCAATTGCTGGGCTTGTATCTGTTGCGCTTGTGCTGATTGAT  
GGAAATAA

ACATCTGAAGCAAACGTACCCTCAACTGTACTACAATAGCAACGTCAATGCTCACAACAACAACAACAACA  
GCAACAACAACAACAACAACAACAACAACAGCAACAACAACAACAATCTTTACAACCAGACGCAGTTCTCC  
ACGAGGTA

GTCTATGGTTGATTTGATGACTGTCATCATGGTGAGATATTCGTTGTTTCTTACTTGGGAACTGGTGCTGT  
TGCAACTGTTGCTGCTCCGTTGTCTTTTTCATGTGAGCAGAACTAAAATCTTGGTCTTGGTCAGAATCTCG  
ATTATCCT

GATTCGGTACTACTCAAATGCAGATACCGAAATATGAGAACAAGCCATTCAAGCCTCCAAGAAGGGTTGG  
ATCAAATAAGTACACACAACCTCAAACCAACCGCCACTGCAGTCACAACAGCCCCTATATCTAAAGCCAAAG  
TTACTGTC

TATAACAATAAAGCAGCTGCACCTGCAACAACAGCACCAGAAAGAGGCAGCGCCTGCATTGACTCTTTGACC  
GGCATTGGAAGCAGTTTCGACTGTAGAAGTGCTGACAGAAGAGGTAGTTGGAGCGACAGAAGAAGAAACGG  
CCTTAGAA

ATCTAGTACTGTGCTATCCTCCTCAATCTGTGAATAGCGTCCCCAGAGATTCTGGGCTCTTGGTCTACCG  
ACAATCTTCCGAAGTGCAGCGGTTGGTGTGCGAAGTCGAGGATCTCGGAGTCGTAGTAGCACTATCGCTG  
ATAGAGCC

TGAAGCAGCAAAAGAGATGGAGTTACCGAAACAACCTCGACCAGACACCAGAACCGGCAGTCCCCCCTTGGT  
TGTTTCATGAATGTACAGTTGCTAGTAGAGCCTGGGACAAAGTAGGAACCTCTGGACCAGTCACCGTTAGTG  
TTAGAAGA

TCGACATCTTCGTTTTGTACAGACCCGCTGTTGTTGTTGTCAAACCTGAGAATTCCTGTTTCGAGTCTGAGTC  
AGAGACAAACATCGGTCTCATCTTCTCCCAAAGTCGAGATGCAGGCACCAAGAGCAGCCACGAAGCAAAAT  
ACATAAAG

CCACTGTATCTTGTCTGAAAACAGCTCCGTACAATGGAGAATTAGGATTTGTGAACATGGTCTGGAAGTGA  
CCCACCATGTGGGATAGATCCCTGTAGGTCACCTGAGTGTCCGTTTCAGGAACAATAACGGCGACATTATC  
GGATACGC

AGATTCGTTATCTGGACCGAAGCTGCTTTTACCAAGTTGGACCAAGTCTGGGGTTCCGAAACCGTTGCCTC  
CTCCAAGGTCGGCTACACTTTGCCATCCCATATCATCTCCACTTCTGATGTCACCAGAATTATCAACTCTT  
CCGAAATC

TGGTCGAATGGAGCAACCAATGGGTTTTGAGCACCAAGAAGTTGTTGTACCAGACAGACAACAAACCACC  
CAACAATGGAATGTTGTCTTCCAATGGGTTTTGGGTGAAGTGGTTGTCGACGGCTTCAGCACCTTCAAGA  
AAGCCTCA

TCTTTTCAGACAATCTCTTAGCCAACAATTGAGCGTATTTCGGCAGCAGCTTCTCTTTGAGCTTGAGCGTTTC  
TGACCTTCAAAGCTCTTTGGTGTCTCTTTCTTTGCAATCTTTGAGGAGTAACCAATCTTTGGATCTTTGGA  
GCCTTGGT

CTGTGCAGCTAAACAGTGGAAGTAACTTGAACATATTCAACAGCAACATCCCTCTTGTGCTGATGCTTATG  
TCTGGAGACAACAGCTTACCTTCCCTTACAGGACTCGATTGATTGTTTCTCTGATCTTTTCTTCAAAGCAT  
TAGATTCA

AATTCATCTACCTTGAATGAAGAGAGTAAAGACAAGGTCAAGGTCAAGGAGAGCAGCTCTGGTAAGTTCA  
AGAGAGTCATCACTTTGCCAGACTACCCAGGTGTGGATGCAGACAACATTAAGCAGACTACGCAAAATGGT  
GTTTTGAC

GCCCTGTGCGCCATCACCAAGGGTTTTCTGCCAAAGAAGCAATGGAGAGCCAAGTTTTCCGCAGTTGATTGTGT  
TAATGGGTGCGAGTGGCTGCTGAGGAACTGCTGCCTGCTGTTGCTGTTGCTGCTGTTGTTGTTGCTGTTGTT  
GTTGCTGT

GGACATGTTAGTGCCAACTCACATGGTTTTCTCAATACTAAGCAAACACCCTCACCCAAATAATCTTGTCCA  
TTCCCCTCACTTTCTCACACAAATGCGAAGAGCCACCTGCCTATCAGTAGCACTAGCACTAAAGAGAACA  
GCACGAAC

GGGGACGAATTCCACAGTACCGAACTGACCGTTGATTCTACCGACCAACTCATTGACCACAGATCTTAAAT  
ATTGGTACTCTTCCACATCTCCACGACTTGGCACTGCAACCTGTACCAGAACAACCTTGCCCTCCATTCT  
GGATGCTC

AAACAGTGGAAAGTAACTTGAACATATTCAACAGCAACATCCCTCTTGTGCTGATGCTTATGTCTGGAGACA  
ACAGCTTACCTTCCCTTACAGGACTCGATTGATTGTTTCTCTGATCTTTTCTTCAAAGCATTAGATTACC  
ATTTGGGT

CGTTCACTTCAAATGCACACCACGAGAATAAAGTACTAGCGTCAGTTGAGGTCAAGTTCAAACCCTTGTTT  
TCCTTGTTCAATCTCTTGGCAATGTCATCCAAGTAGGTTGTGTCGATTTCATTTACAATGTCATCATTGGC  
ATCGTAGT

ATAACTATAAACACTTATAGAACAATTACCGTTTTCTTCCCTTACACAACATGGCTTCTACTTCGAACACGT  
TCCCTCCAAGCCAAAGCAATTCTTCCAACAACCTTCCAACCTTCTAGACATGCATCCATTGTGGAGATGCTG  
TCTACTCC

TGGTTTCCCAGTTCTTCAATGTTGATTCTAATGGATGTCTGTCATTCAATTGTGTGGAAAGAGGTACTGCA  
CCGCTTCTTGCTGGCGTAATGTGTCTGGCAAGGAGGGCACTGCAGATGAAAGAACAACCTTTTGTCTTGATC  
TGTAGAGA

ATGTACAGTTGCTAGTAGAGCCTGGGACAAAGTAGGAACCTCTGGACCAGTCACCGTTAGTGTTAGAAGAT  
GATGACGAAGATGATGAAGCAGCAGCAGCAGAAGAGGTGGTTTTAGAGGAAGAGATGGAAGACTGGCTTTT  
ACTCGTTT

ATCTGAAAGTGGACGACAAGTGTGGTGTGACTCCATCCCGTTGATCCTGAAAAGGTTGTTGCGATTGTG  
GAGTCCACCATGAGGGACCAGGTCCACCAAATACGCCCTCTGACGACATGTCCAGGGCTATTGCAGGTCA  
TTTGGTCG

TCTTGCGTTTTACCATAGAGTTTTTGGAGCATTGGGCCATAACAACCTGCATTGGGATCTTTCCTGAAGGTGG  
GTCCCACGACAGAACAACCTTGTGGCCCTGAAAGCAGGTGTGGCGATTATGGCTCTTGGTTGCATGGATA  
AGCATCCT

ACAACAACAACAACAACAACAGCAACAACAACAACAATCTTTACAACCAGACGCAGTTCTCCACGAGGTAC  
TTCAACTCGAACTCCTCTCCCTCGTTGACTTCTTCCACTTCTAACTCATCCTCTCCATACAACCAAAGCAC  
CTTCGAAT

TGAAGAGGAAGAGGATTTCGGTTGTCTTAGAATTGTTTCGTGACATTCTTCACTCCAGCATCACGATGGCGGT  
GGTGGTGATGATGATGGTGGGGCTGAGTAGCATCTGTAGTAGTAGTAGTAGTAGTATTGTTATTAGATGGT  
CTCGCAGA

CTGGAGTTGGTAGTCGCATTGGTACTGGCATTAGCACTACCATGAATGCACGTGTGCTGCTGCTCATCACT  
GCTGCAATACTTTCTGCACCTGTCACTGCTATTGCTCTCCTGGAAGCTAGACGGTAACGCAACGATCGACA  
TGGAAGCT

GCACAAAATAATCTGGTTATGTGTCTTCATTTGGTAATCACTGGGATGTTACTGGGGCAGCAGCAACTCCG  
TGTGTACCCCTAACTCCGTGTGTACCCCTAAAGAACCTTGCCTGTCAAGGTGCATTGTTGGATCGGAATAG  
TAACCGTC

TGCTTTAGCGCATAGCGAACTCCTACTAGTAGTAATAATAAGGAGGCAGTATCACAAACCAAGTGAAGGGA  
AGCACAAGCACAAGCACAAGCACAAGCACAACACAAGAACAGTAGCTCCAAAGATGGCTCTTCC  
GAAGAAAA

CCGTAAACTCATTGCCATACATATCCTCCAGATGGAAGGGTCCCCAAGTGAAGGTTTACCGTATCCTCTG  
TTTGCTTTCAGCCTCCTTCTGTGTTTTCAATCTGCGTTTTCTCCCTGTTGAAGAAATAAGAAAGTGCCCCACC  
GACTGCTA

CATTTACCGCAGAAGGAGGATAGTTCCAGTCTTTCCTACTACAGCTGTTGCTCCACCCTCTTCCCACGC  
CAATGTAGAGGCTTTCAGCAGATGTACAGCATCTGGACACTGCGATTAAGCTAGATAATCAATATTACTTCA  
AACTGATG

TTCTTAACGGTGGCCATAACCATATCACCTAGAGAGGCGGCTGGCAATCTGTTCAATCTGGAACCAGAGCC  
TTTGACGGCGATAATGTACAAGTTTTCTGGCACCCTGTTGTGTCAGCACAGTTTCATGATGGCACCGACTGGTA  
GACCTAAC

GCTTCCGCTAGCTCTTCTTCTCTTCTTCTAAGAAGTCTAAGGGTGTGCTCCAGAACTTGTTCAGCCAC  
TTCATTTCATGGGTGTGCTTGTGCTGTTGGCGTTGCTTACTATAAGATTAAGCAACAATTTGTGTTTCTA  
TTATTACT

TATGCTCTCCCCATGGTCTGCTCCATGCAGTGCCATCATCCGTCACAACTAGCTTGCAGTTCCCTGGTCT  
CCCCAGGTACCACTTCTTTTCTATCCACCAGGTCTGTACCTGATGATCTTGTTCACCATGTAGCATCG  
TGATCGTA



CTCCAGGTGCTCACTTGGGTAGATTCTGTTATCTGGACCGAAGCTGCTTTACCAAGTTGGACCAAGTCTGG  
GGTTCCGAAACCGTTGCCTCCTCCAAGGTCGGCTACACTTTGCCATCCCATATCATCTCCACTTCTGATGT  
CACCAGAA

CCATACCCATATCTGAAAGTGGACGACAAGTGTGGTGTGACTCCATCCCGGTTGATCCTGAAAAGGTTGT  
TGCGATTGTGGAGTCCACCATGAGGGACCAGGTCACCAAAATACGCCCTCTGACGACATGTCCAGGGCTA  
TTGCAGGT

CCAAAGTAGCTGGAGTAATCTTTTGGAGCAAGATAGAGGTAGTTGGTCTGTTACCTGAGAAGACCTTGTGT  
GGGACCAAACCACAGTGGCACCTTCAGCCTTAACTTGTCTTCATCCTTACCAACCATTAAAGCTTCAGC  
TTGAGCAA

TTGTTTCATGAATGTACAGTTGCTAGTAGAGCCTGGGACAAAGTAGGAACCTCTGGACCAGTCACCGTTAGT  
GTTAGAAGATGATGACGAAGATGATGAAGCAGCAGCAGCAGAAGAGGTGGTTTTAGAGGAAGAGATGGAAG  
ACTGGCTT

CAACAACAACAGATATCTAAACTCTTTCCAATCTTCCTTGGAAAGTGTCTCTGACTCTTTACAATTCTCTT  
CCAACGGTGACAACACTACTTTGGCCTTCGACAATTTGGTCTGGGCTAACAACATCACTTTGAGAGATGTT  
AACTCTAT

AATCTCTTGGCAATGTCATCCAAGTAGGTTGTGTCTGATTTCATTTACAATGTCATCATTGGCATCGTAGTC  
CCAAGCAGGACATGAGTTACAAGCACTCAAAGTGTGGCACCAGCGGATTTCAGCTTCACTGACAGTCTGCA  
AGGTGATG

GAACCACTTGTCAATAGACTTGTCAATTGGAGCATCTGCCTTTGGAGAAGCTGGTGGGATGGCATCAGAGG  
CAGCCTTGGAGTAGGTTGGGGTGTGAGGCAAAGTAACATTGGTCAAATCAATACCCTTGCTGTGAGAAGAC  
TTACCAGC

AGTAGGAACCTCTGGACCAGTCACCGTTAGTGTTAGAAGATGATGACGAAGATGATGAAGCAGCAGCAGCA  
GAAGAGGTGGTTTTAGAGGAAGAGATGGAAGACTGGCTTTCACTCGTTTTCAACTGCTTGAGCACTGCTGGA  
CAAAACAG

AATCTCTTAGCCAACAATTGAGCGTATTTCGGCAGCAGCTTCTCTTTGAGCTTGAGCGTTTTCTGACCTTCAA  
AGCTCTTTGGTGTCTCTTTCTTTGCAATCTTTGAGGAGTAACCAATCTTTGGATCTTTGGAGCCTTGGTGT  
AAGTCTTT

TTGGTTTTGTCTAATGAATAATTCCATTGTGCTCTATGATGTTGCACATGCACGTGTTTTGTTGTACCTCTA  
CTCTGGGTGCAAGTGGTTTTGATGCTCACCGTCCAGAGCCACTTTGTGTCCCGACGTACCTGTTCCATCCTT  
CAAACGCC

TTATCTCCATGTTTTGGCACACAGTGAACAGATTGGTCTATTCTCGTCGCATCTGCGTTTTCTTGAATCTGCA  
TGCCCAGCACCCAGTAAATGTCTCCTCCCTTGGTGGGGGGCACTTTGGAGGATGACGCTACTTTCTTGCTTC  
TCTGCTGC

CAGAAGAATGTGAGAAGGTTTTCCACTCAGGCTAATTCTCAACAGCCAACAACACCTCCCTCATCTGCTGTT  
CCAGAGAACCATCATCATGCCTCTCCTCAAGCTGCTCAAGTACCATTGCCACAAAATGGGCCGTACCCACA  
GCAGCGCA

GTTTTGTACAAATCCTCCAATGAGGCGATTGCTGTAATGCATCTTTGCCACACATCTGTCTATGCAGCATTG  
CTCACCTTTGTTAGATCAGGCTCACCAAAGCCCTCATGCGGAATACATTTCTCAAGACACGTACTGAGAA  
TATTGTTG

CCCCCTTGGTTGTTTCATGAATGTACAGTTGCTAGTAGAGCCTGGGACAAAGTAGGAACCTCTGGACCAGT  
CACCGTTAGTGTTAGAAGATGATGACGAAGATGATGAAGCAGCAGCAGCAGAAGAGGTGGTTTTAGAGGAA  
GAGATGGA



GCAGCACCAGAAACACCATCTGAAGCAGCAAAAGAGATGGAGTTACCGAAACAACCTCGACCAGACACCAGA  
ACCGGCAGTCCCCCTTGGTTGTTTCATGAATGTACAGTTGCTAGTAGAGCCTGGGACAAAGTAGGAACCTC  
TGGACCAG

ATAACCAGCAGGGATATAACCAACAAGGCCATCAACAACCAGTCTACGTCCAACAACAACCACCCAGAGG  
GGTAACGAAGGTTGTCTGGCTGCATGTCTGGCTGCATTATGTATATGCTGCACCATGGATATGCTATTCTA  
AGAGAACC

CCAGAAATCCCATTGGTTGTCTCCACTGACTTGAATCTATTCAAAGACCAAGGAAGCTGTTGCTGCTTT  
GAAGGCTGTTGGTGTCTACTCCGACTTGTGGAAGGCTTGAAGTCCAAGAAATTGAGAGCCGGTAAGGGTA  
AGTACAGA

ACTCTTTCCAATCTTCCTTGGAAAGTGTCTCTGACTCTTTACAATTCTCTTCCAACGGTGACAACACTACT  
TTGGCCTTCGACAATTTGGTCTGGGCTAACAACATCACTTTGAGAGATGTTAACTCTATTTCTTTTCGGTAG  
TTTGCAA

CAAACGTACCCTCAACTGTACTACAATAGCAACGTCAATGCTCACAACAACAACAACAACAGCAACAACAA  
CAACAACAACAACAACAACAGCAACAACAACAACAATCTTTACAACCAGACGCAGTTCTCCACGAGGTACT  
TCAACTCG

TGCGATAGTGTAGATACCGTCCTTGGATAGAGCACTGGAGATGGCTGGCTTTAATCTGCTGGAGTACCATG  
GAACACCGGTGATCATTCTGGTCACTTGGTCTGGGGCAATACCAGTCAACATGGTGGTGAAGTCACCGTAG  
TTGAAAC

GCTGCCAATCCTGAATTTCTTGTCTCGCTTGTGGTACGTTCTGGACGCAACTTGAACAGAGCAGTTTCA  
GCTTCCGAGACGAATCCGTGGCTCACCAGCCACCTTGGAGATTCGTCCTTTGAGCCAAGCTAAAATATT  
CGCTACCG

TGTTGGACTTGCAGTTGTTGCTGAACTTGCATCTGCTGCTTGGCTTGCATCTGTTGCTTTGCCTGCATCTG  
TTGTGCCTGCAATTGCTGGGCTTGTATCTGTTGCGCTTGTGCTGATTTCATGGAATAACAGGTCTCACCA  
TTGGAATT

GATGATGAAGCAGCAGCAGCAGAGAAGAGGTGGTTTTAGAGGAAGAGATGGAAGACTGGCTTTCACTCGTTTC  
AACTGCTTGGAGCACTGCTGGACAAAACAGTAGAGTCTTTAGTGTAAGAAGAAGGAACAGCAGGACCGACAA  
CGGTATTG

ATTGGTCTATTCTCGTCGCATCTGCGTTTTCTTGAATCTGCATGCCAGCACCCAGTAAATGTCCTCCCCTT  
GGTGGGGGGCACTTTGGAGGATGACGCTACTTTCTTGTCTCTGCTGCCTCTTACTATTGACCATTTGGT  
TCTAGTGC

GGTAGAGTTGAAACCGGTGTCATCAAGCCAGGTATGGTTGTTACTTTTCGCCCCAGCTGGTGTACCCTGA  
AGTCAAGTCCGTTGAAATGCATCACGAACAATTGGAACAAGGTGTTCCAGGTGACAACGTTGGTTTTCAACG  
TCAAGAAC

TTATTATTTGCATTTTGAATTTGCATTTGCTGTTGGACTTGCAGTTGTTGCTGAACTTGCATCTGCTGCTT  
GGCTTGCATCTGTTGCTTTGCCTGCATCTGTTGTGCCTGCAATTGCTGGGCTTGTATCTGTTGCGCTTGT  
GCTGATT

GGCATGATGTTGATTTTGGAGCCAAGACATGCTCGTAGGCTTCTTTCGCACCTTGCCACTCTCCATACTCT  
CCAAAACACTACCCAACCTGAAACCATATGTCCACTCCTGCAAGGGAGCAGGAGGTTGAGGGAGAATGTAT  
CTGAAGCA

CAGAGGCTAGACTGCTGGACACATGCAACGAAATTAGGATTGAAGCTCACCTGAGAAGGGAAACCACTGAC  
GAGGGCCAAGTGAACATAAGTTGGCTGCGCCCTTGGACCTTGGCAACGGTTATTTTACTACCCATGCGA  
CTTGTCTT

AAGCAGCTGCACCTGCAACAACAGCACCGAAAGAGGCAGCGCCTGCATTGACTCTTTGACCGGCATTGGAA  
GCAGTTTTCGACTGTAGAAGTGCTGACAGAAGAGGTAGTTGGAGCGACAGAAGAAGAAACGGCCTTAGAAGA  
TGATTTCGG

TCTCTTGGGAGACCTTCACTCTTTAGTTTACAGAGTAAATATTTGTATCCATGATGATTAACACGTCTTGGTC  
GGTTCTGGTTTCTTGTCCAGCTTGGACAGCAGATTCTGGCAAGCCTCTAATAGCATTCAAATCTCCTTTAA  
CCAGTTCA

TTACTTTTCGCCCCAGCTGGTGTACCCTGAAGTCAAGTCCGTTGAAATGCATCACGAACAATTGGAACAA  
GGTGTTCAGGTGACAACGTTGGTTTCAACGTCAAGAACGTTTCCGTTAAGGAAATCAGAAGAGGTAACGT  
CTGTGGTG

TCTGGACCAGTCACCGTTAGTGTAGAAAGATGATGACGAAGATGATGAAGCAGCAGCAGCAGAAGAGGTGG  
TTTTAGAGGAAGAGATGGAAGACTGGCTTTCACTCGTTTCAACTGCTTGAGCACTGCTGGACAAAACAGTA  
GAGTCTTT

TATTCAGGTACTCTAGGACAATTCTATTCAAGTCTGACGCCGAAAACGGACCATTGGACCTCCCCTGCTGT  
TGAGACTGGCCTTGACTCTGTTGCTGTGGCTGCTGGCCGGAATTGGCGCCAGCAGCATTATTAGTTCTGTTG  
ATTCCTTTA

GCAGCCTTGAAGAAGATGCAGCCTCGGAAGAAGATGCAGCCTCGGAAGAAGCTGGGGAAACGGAGGCAAG  
AGCAGCAGCGATTTCAAGCACTCAATCTTGTGGTGTACCATGGCAATTTAACAATTGTCTTAGTGATAGCAT  
CAAAGTCC

CCGGACCCACACTATCCGCTGCCACAGTATATCCCACCGCTGAGTACTTCCCTCACCTGATCCAATCGATT  
ACAGGATCAACACTCTGAAGTACCTCAAGCTAAGACAAAGGTGAGAAATAATGTCTTACCACCACACTT  
TAACATCA

TTGCTGCAGCTGTTGTCTTGGTAGGGGCTGTAATTGCTGCTGCTGTTGTTGTTGTTGTTGTTGTTGTTGTT  
GTTGTTGTTGTTGTTGTTGTTGTTGTTGTTGTTGTTGTTGTTGTTGTTGTTGTTGTTGTTGTTGTTGTTGTT  
TGTGCTTG

TGGCGCTGTGTGGTTTTCCAGTTCTTCAATGTTGATTCTAATGGATGTCTGTCAATTCAATTGTGTGGAAAG  
AGGTACTGCACCGCCTTCTTGTGGCGTAATGTGTCTGGCAAGGAGGGCACTGCAGATGAAAGAACAATTT  
TGTCTTGA

TTGCATTTGCTGTTGGACTTGCAGTTGTTGCTGAACTTGCATCTGCTGCTTGGCTTGCATCTGTTGCTTTG  
CCTGCATCTGTTGTGCCTGCAATTGCTGGGCTTGTATCTGTTGCGCTTGTGCTGATTGATGAAATAACA  
GGTCTCAC

ACCAGCACCTGCGACACCTCTTAAGATGTTAGCACCACAACCTTGAATAGAGAACCAACACCTTCAGCAG  
CAACAATCTTCCCTCAAACAGTCAAAGGCACCGTCTGACTTAAACAGCTTGACCGGAGGTCATCATCATTCTT  
CTTCTAAC

ACCCCCCTCATTTACGCTAAGCACATTTATGAAAACATAGACGGCTACAAGTGCCTTCCGTCAAAGAGGCC  
TCTTGAACAATTTCCCCACGGAACCTCACAGGGAGATCGCCCCAATAAGGCTAGCTTTTCCAACAAGA  
AGGCAATC

TAGCGGATATTTCACTATGTTTGTATCCTCTCGATTTGTACACCCCTGATGACATCCAGGTTGAGGCTTTAC  
AGTTCAATCTAGCAGAGAGAGCCAAAAGATCCTTGTCTACCGCAACGTGACGAAATATTAACGGCTGTA  
GATGAAGA

GCAGTTGTTGCTGAACTTGCATCTGCTGCTTGGCTTGCATCTGTTGCTTTGCCTGCATCTGTTGTGCCTGC  
AATTGCTGGGCTTGTATCTGTTGCGCTTGTGCTGATTGATGAAATAACAGGTCTCACCATTGGAATTGC  
TGGGGAAT

GTTACGCCACTGCTTCTGCTATTGCTGCTACTGCTGTTGCCTCTTTGGTCTTGGCCAGAGGTCACAGAGTC  
GAAAAGATTCCAGAAATCCATTGGTTGTCTCCACTGACTTGAATCTATTCAAAGACCAAGGAAGCTGT  
TGCTGCTT

TGCAAGTAGGCTGGGAATCTGTGCAAGTATTGGTCGAATGGAGCAACCAAATGGGTTTGGAGCACCAAAGAA  
GTTGTTGTACCAGACAGACAACAAACCACCAACAATGGAATGTTGTCTTCCAATGGGGTTTGGGTGAAGT  
GGTTGTCTG

AATTCTACCCAACATGTCTTCAGACACAGGAATTCTCAAACCTCTCACCAGTGAATTCCACGGTAGTCTTCT  
TGACATCAATACCAGATGTACCTTCAAACACTTGCACAATGGCTCTATCTCCTCTAATTTCCAAAACCTTGA  
CCTTGTCT

TGAAACCGGTGGTGATCACACCAATGAATCCCGTGTAGATGAATGTTGTGCTGAGAAAGTGAACGACACTG  
AGACTGGCTTGGATGTGGACAGCTGTTGCGGCGATGCTCAAACAGGTGGTGACCACACCAATGAATCCTGT  
GTTGATGG

GTAGCCATCTGTCCTGCTCTCTTAGCGTGGAAATTTGCTGCAAACCTGCCGCTGGAGCTAGCGTTTTCCACCG  
TTCTCCTGAGTATCCTCTGGGCTTGTGCTAACATGTTCCGACTCGTTGGTATTTCATATTCTCGAGAGTTTT  
GTGCCACT

TGCTTCGCTTGGTGTACGTTCTCGACGCAACTTGAACAGAGCAGTTTCAGCTTCCGAGACGAATCCGTG  
GCTCACCAGCCACCTTGGAGATTCGTCCACTTTGAGCCAAGCTAAAATATTGCTACCGCAATCACGGATC  
CGGAAAAG

CATTTGCAGTTGGTTCGTACATTGAGATAACACCAGCACCTGCGACACCTCTTAAGATGTTAGCACCACAAC  
CCTTGAATAGAGAACCAACACCTTCCAGCAGCAACAATCTTCTCAAACAGTCAAAGGCACCGTCGTACTTA  
ACAGCTTG

ACAACAATCTTTACAACCAGACGCAGTTCTCCACGAGGTACTTCAAACCTCGAACTCCTCTCCCTCGTTGACT  
TCTTCCACTTCTAACTCATCTCTCCATAACAACAAAGCACCTTGAATACATTTTGGCCGTCAACTTCGGC  
AGCTTCCA

AACTTCTTACCAAACAAGATCATTTCAGTGGTTCGTACATTGAGATAACACCAGCACCTGCGACACCTCT  
TAAGATGTTAGCACCACAACCCTTGAATAGAGAACCAACACCTTCCAGCAGCAACAATCTTCTCAAACAGT  
CAAAGGCA

CATTGGTTGTCTCCACTGACTTGAATCTATTCAAAGACCAAGGAAGCTGTTGCTGCTTTGAAGGCTGTT  
GGTGTCTACTCCGACTTGTGGAAGGTCTTGAAGTCCAAGAAATTGAGAGCCGGTAAGGGTAAGTACAGAAA  
CAGAAGAT

CCGTACCAAGGAGAAAAGTCCTGTGAATGTTGAGCACCAACACCCACTGCAGCACCATTAGGACCTCTGAA  
GACATTTGACATTTTTGAGTACCACCAGACATGTAGTGAGTCTTTGCAGCGGAATTGACAACATGATCGA  
TAGCTTGC

GTGCAAGTATTGGTTCGAATGGAGCAACCAAATGGGTTTGGAGCACCAAAGAAGTTGTTGTACCAGACAGACA  
ACAAACCACCAACAATGGAATGTTGTCTTCCAATGGGGTTTGGGTGAAGTGGTTGTGACGGCTTCAGCA  
CCCTTCAA

GAAGATCACGTAGCGCACACCGTCTTTGAGATCCTGCCACAGATCCAGCGGAGGTCTGACAAATTGCTTCC  
TTTGCAGAGACTTTTACCTTGCAGGACTGTTACCTTCCATACTACTAGTATCTAACTCTTTCTCTCTC  
CCATACAC

ATGTGTACATGAGGTAACCTGGTCTATGGTTGATTTGATGACTGTCATCATGGTGAGATATTCGTTGTTTCT  
TACTTGGGAAGTGGTGTGTTGCAACTGTTGCTGCTCCGGTTGTCTTTTCATGTGAGCAGAATAAATCT  
TGGTCTTG

TTGTCTGAAAACAGCTCCGTACAATGGAGAATTAGGATTTGTGAACATGGTCTGGAAGTGACCCACCATGT  
GGGATAGATCCCTGTAGGTCACCTGAGTGTCCGTTTCAGGAACAATAACGGCGACATTATCGGATACGCTA  
AAAGTATC

TTTTGAGCATTGGGCCATAACAACCTGCATTGGGATCTTTCCTGAAGGTGGGTCCCACGACAGAACAACCT  
TGTTGCCCCCTGAAAGCAGGTGTGGCGATTATGGCTCTTGGTTGCATGGATAAGCATCCTGACGTCAATGTT  
AAGATTGT

AGAGGATGGAGCGGCAGAGGATGTAGCTTCGGAAGAAGATGCAGCCTTGAAGAAGATGCAGCCTCGGAAG  
AAGATGCAGCCTCGGAAGAAGCTGGGGAAACGGAGGCAAGAGCAGCAGCGATTTCAGAACTCAATCTTGTG  
GTGTACCA

ATGTAGCTTCGGAAGAAGATGCAGCCTTGAAGAAGATGCAGCCTCGGAAGAAGATGCAGCCTCGGAAGAA  
GCTGGGGAAACGGAGGCAAGAGCAGCAGCGATTTCAGAACTCAATCTTGTGGTGTACCATGGCAATTTAAC  
AATTGTCT

TTGAGCGGAGGCAGCACCAGAAACACCATCTGAAGCAGCAAAAGAGATGGAGTTACCGAAACAACCTCGACC  
AGACACCAGAACCAGGAGTCCCCCTTGGTTGTTTCATGAATGTACAGTTGCTAGTAGAGCCTGGGACAAAG  
TAGGAACC

ATGGATATCGCCACTGTATCTTGTCTGAAAACAGCTCCGTACAATGGAGAATTAGGATTTGTGAACATGGT  
CTGGAAGTGACCCACCATGTGGGATAGATCCCTGTAGGTCACCTGAGTGTCCGTTTCAGGAACAATAACGG  
CGACATTA

GCATGCCCCCTCTGCAAGACCAACTAAAGTAGACCCTACCGGTATCTCTACCATTGTTTCTATGGCCTCTC  
ATGTAGATCAAACCTGAGCATGACCTGGACATCTTGGTCACTGACCAAGGTTTGGCGGATCTAAGAGGTCTA  
TCGCCTAA

TGGTCGTACATTGAGATAACACCAGCACCTGCGACACCTCTTAAGATGTTAGCACCACAACCCCTTGAATAG  
AGAACCAACACCTTCAGCAGCAACAATCTTCCCTCAAACAGTCAAAGGCACCGTCGTACTTAACAGCTTGAC  
CGGAGGTC

TTTGTGGTTAGATAAAGGAACATAAAGAACCTTTGTTGGAGCAACCAAAGGTGGGAAGGAAAGAACACTTC  
TGGCATTGTCTTCTGGTCTGTTCCAGAAAGAGTGCTCAAAAACGGAGTAGATGATACGGCCAATACCGAAA  
GATGGTTC

CAATTCGTCTGTTGAATAATTGTTTCTTACTGGAACCTTTGCGTCCAGAAAGCTTAGCTTGTGTAATTG  
ATGCAGACGATGAAGACGATGAAAAGGAGGAGACAGCAGCACCAGTATCATCTCTTGATAAGTCCATCTCA  
TTCAAACCT

AACCACATAAGTCTGATATCGTAACTACAATTATCTCCATGTTTGGCACACAGTGAACAGATTGGTCTATT  
CTCGTCGCATCTGCGTTTTCTTGAATCTGCATGCCAGCACCAGTAAATGTCCTCCCCTTGGTGGGGGGCA  
CTTTGGAG

TAGTCGCATTGGTACTGGCATTAGCACTACCATGAATGCACGTGTCGCTGTCTCATCACTGCTGCAATAC  
TTTCTGCACCTGTCACTGCTATTGCTCTCCTGGAAGCTAGACGGTAACGCAACGATCGACATGGAAGCTGT  
CGCCTGAT

CTCCACTGACTTGAATCTATTCAAAGACCAAGGAAGCTGTTGCTGCTTTGAAGGCTGTTGGTGTCTCACT  
CCGACTTGTGTAAGGTCTTGAAGTCCAAGAAATTGAGAGCCGGTAAGGGTAAGTACAGAAACAGAAGATGG  
ACTCAAAG

ACCTGCAACAACAGCACCGAAAGAGGCAGCGCCTGCATTGACTCTTTGACCGGCATTGGAAGCAGTTTCGA  
CTGTAGAAGTGCTGACAGAAGAGGTAGTTGGAGCGACAGAAGAAGAAACGGCCTTAGAAGATGATTCGGCA  
GATGATGA

CTGGGAATCTGTGCAAGTATTGGTCGAATGGAGCAACCAAATGGGTTTGAGCACCAAAGAAGTTGTTGTAC  
CAGACAGACAACAAACCACCCAACAATGGAATGTTGTCTTCCAATGGGGTTTGGGTGAAGTGGTTGTCGAC  
GGCTTCAG

CTTGGCTCTCAACTTTTTAGCCATAGTCATTTTTCTTTGGACCAGAAGATGGAGTTGGGGTTGCTGGGGTTG  
CTGGAGTAGCTGGAGTAGCTGGGGAGGACCCACCAGCTGTTCTACCGGCTAGTCTCTGTTTCGATGGCTTCT  
TCCATTTT

AACAACCTTGCCCCTCCATTCTGGATGCTCGTTCAGAAACACTTCCATGGCGTGCAACTTCTGAGGCACAC  
CTTTGATGTAATCCAGCCTGTGACACCAACTATGATCTTGCAGCCCTTGAAAGTTTCTTCAATTGTTGG  
ATTCTCTT

CCCATGGTCCTGCTCCATGCAGTGCCATCATCCGTCACAACCTAGCTTGC GGTTCTCTGGTCTCCCCAGGTAC  
CACTTCTTTTCTATCCACCAGGTCTGTACCTGATGATCTTGTTCACCATGTAGCATCGTGATCGTAGA  
AGTAGCCA

GTTCTTACATTGATAAGAAATGTCCATTCCTGGTTTTAGTTTTCCATCCGTGGTAAGATCTTGACCGGTACC  
GTCGTCTCCACCAAGATGCACCGTACCATTGTTCATCAGAAGAGCTTACTTGCATTACATTCCAAAGTACAA  
CAGATACG

CGGAACAATAAATTACTATATTATCAACCATTTCTATCATCTTGGCACATTGCAGGTGCAACCTTCGGAAT  
AGACCTCTCCTTCCCAGACGTCCTGCCACTCCGTTTTAGCGTGGTATTAGACCCAACCTTGTTTCTAGA  
ATACCTTT

TCCGCAACAATCTCAACCCATTGCTAATCAATCAGCGACTTCTACCCCTCCTCCTCCTCCAGCACCACACA  
ACTTACATCCCCAAATTGGTCAAGTGCCCTTAGCTCCAGCGCTATTAATTTGCCTCCACAAATTGCTCAG  
TTACCTTT

GTAGTAGGCAATCAAAGCACCCAAAGTAGCTGGAGTAATCTTTTGAGCCAAGATAGAGGTAGTTGGTCTGT  
TACCTGAGAAGACCTTGTGTGGGACCAAACCACAGTGGCACCTTCAGCCTTAACTTGTCTTCATCCTTA  
CCAACCAT

GTGCCAACTCACATGGTTTTCTCAATACTAAGCAAACACCCTCACCCAAATAATCTTGTCCATTCCCACTCA  
CTTTCTCACACAAATGCGAAGAGCCACCTGCCTATCAGTAGCACTAGCACTAAAGAGAACAGCACGAACAA  
GGAGGAGG

CCCAAGCAGGACATGAGTTACAAGCACTCAAAGTGTGGCACCAGCGGATTCAGCTTCACTGACAGTCTGC  
AAGGTGATGTTGAATTGGTACCTAAACCATCAATGAAATATTGAGCAGTGTGATGACATCTCTTAGAATT  
AGAGGTAA

TACTGCAGCCAATGCAGTTTTCTGCCACCGCTCAATCGTCTGCTAATGGTGCAGCTCCAATGTCAAAGTCAT  
CCTCTTCAACATCCCTCAACTCCCACTCTCCGTTGATGACAGCAATGGAAGACCCACCATCCCCACGTTCT  
TCGGCCAT

AGACCCGCTGTTGTTGTTGTCAAACCTGAGAATTCCTGTTGAGTCTGAGTCAGAGACAAACATCGGTCTCA  
TCTTCTCCCAAAGTCGAGATGCAGGCACCAAGAGCAGCCACGAAGCAAATAACATAAAGGTGAGATAGAAG  
GTTAATGA

CCCAACTATAATAACTATAAACACTTATAGAACAATTACCGTTTTCTTCTTCCACACAACATGGCTTCTACT  
TCGAACACGTTCCCTCCAAGCCAAAGCAATTCTTCCAACAACCTTCCAACCTTCTAGACATGCATCCATTGT  
GGAGATGC

CCCAGCTGGTGTACCCTGAAGTCAAGTCCGTTGAAATGCATCACGAACAATTGGAACAAGGTGTTCCAG  
GTGACAACGTTGGTTTTCAACGTCAAGAAGTTTTCCGTTAAGGAAATCAGAAGAGGTAACGTCTGTGGTGAC  
GCTAAGAA

TTTCAGCCTTTCTTTTCAGACAATCTCTTAGCCAACAATTGAGCGTATTCGGCAGCAGCTTCTCTTTGAGCT  
TGAGCGTTTTCTGACCTTCAAAGCTCTTTGGTGTCTCTTTCTTTGCAATCTTTGAGGAGTAACCAATCTTTG  
GATCTTTG

CACTGATAACGTCTGGTGCAGGTTGATATACGGCAATTCTGGATCAGGCATGTACCTGTAATCGATCGTG  
GTTTCTTTGCTTCTCAACTTCACCGTTGATGAGCCTGTCCAGCCCCTTGTTTCTGGCTCCATCAGTGAGCT  
AGTGTCAC

TTCGAACACGTTCCCTCCAAGCCAAAGCAATTCTTCCAACAACCTTCCAACCTTAGACATGCATCCATTG  
TGGAGATGCTGTCTACTCCGCCATTGCTGCCCCACGTTCAAGTGAACGATACAGACGACAAGGAACAACCA  
GAAGAGTC

CCTCTGTCAAATGGCTTTGGGCAACAGCAACAGCAACAGCAACAGCAACAGCAGCCTCTGAACAAAAACAA  
CGCTTTGTTGCCACAAATGAACGTGGAAGGAGTTTCTGGGATGGCTGCGGTTACAGCCTGTCTATGGCCAAG  
CCATGTCA

GGGGTTAATGTCCTCACCTTCTTGAATATCGTCTAATTCTTCAGACTCTTCTTCAGTGGCTTCTACTCTCT  
TATGATGTTGCAATTCTGAGTCTGGTATCCTCTCCACCACAATATCCTCCAACCTTAGGCGTAGCAGGGCTG  
GTGCTTTT

AGCATTGCCAAGGCATCGCTCGATCTCAAACATCATACTTCTGAACTCAACTCTAGCACATCAGAGCCAGA  
CAGTCAAAGACGGTCAAAGATAGTTCTGTGCCCTAATAATTGATAGCAGTGGTTACAGCAAATTGAGAAC  
ATAACAAA

CATCACCAGGGTTTCTGCCAAAGAAGCAATGGAGAGCCAAGTTTCCGCAGTTGATTGTGTTAATGGGTG  
AGTGGCTGCTGAGGAACTGCTGCCTGCTGTTGCTGTTGCTGCTGTTGTTGTTGCTGTTGTTGCTGTTG  
AGCGGGTT

CCCAAAGACCGCTATTGAAGGTTCTTACATTGATAAGAAATGTCCATTCACTGGTTTTAGTTTTCCATCCGTG  
GTAAGATCTTGACCGGTACCGTCTCCACCAAGATGCACCGTACCATTGTCATCAGAAGAGCTTACTTG  
CATTACAT

CTTTAGTTTCAGAGTAAATATTTGTATCCATGATGATTAACACGCTTTGGTCCGTTCTGGTTTTCTTGTCCAG  
CTTGGACAGCAGATTCTGGCAAGCCTCTAATAGCATTCAAATCTCCTTTAACAGTTCAATACCGGCAACC  
TCCAACCT

TGTCCAGCAGATTAGATAGGTGTAATGGAAATTGTGTACCAGGCAAATTCCTCCTTGGAGTGATCTAGA  
CAACCAAAATTGCCAGGCAACCTGGATAAGACACTCTATGTCTGAGGAAGAGTTAGAAATGTATTGAAGAC  
ATTAGCTT

ACAAATTTAACAGCTGCTAATACTGCAGCCAATGCAGTTTTCTGCCACCGCTCAATCGTCTGCTAATGGTGC  
GACTCCAATGTCAAAGTCATCCTCTTCAACATCCCTCAACTCCCACTCTCCGTTGATGACAGCAATGGAAG  
ACCCACCA

AAATATCTTTTTATGCTCTCCCCATGGTCTGCTCCATGCAGTGCCATCATCCGTCACAACCTAGCTTGGCG  
TTCCTGGTCTCCCCAGGTACCACTTCTTTTCTATCCACCAGGTCTGTACCTGATGATCTTGTTCACCA  
TGTAGCAT

TTCACTATGTTTGATCCTCTCGATTTGTACACCCCTGATGACATCCAGGTTGAGGCTTTACAGTTCAATCT  
AGCAGAGAGAGGCCAAAAGATCCTTGCTCACCGCAACGTGACGAAATATTAACGGCTGTAGATGAAGAAG  
AGAGTGAC

AGCAACAACAACAACAATCTTTACAACCAGACGCAGTTCTCCACGAGGTACTTCAACTCGAACTCCTCTCC  
CTCGTTGACTTCTTCCACTTCTAACTCATCCTCTCCATACAACCAAGCACCTTCAATACATTTTGCCGT  
CAACTTCG



CGAACTGACCGTTGATTCTACCGACCAACTCATTGACCACAGATCTTAAATATTGGTACTCTTCCACATCT  
CCACGACTTGGCACTGCAACCTGTACCAGAACAACCTTGCCCTCCATTCTGGATGCTCGTTCAGAAACAC  
TTCCATGG

GAAATGACAGAAATCAAAATAACAGCATTTATAAAGTGAGGCACAACCTTTGACACCATGTGATGCAACAGC  
AATGACAAATGGGGAGGCATGGGATCCAGAGGAGTCACTAGACCCTAATAATTCGTCACTGTTGTATGGAA  
CAAGAAAG

CAGTGAACAGATTGGTCTATTCTCGTCGCATCTGCGTTTTCTTGAATCTGCATGCCAGCACCCAGTAAATG  
TCCTCCCCTTGGTGGGGGCACCTTTGGAGGATGACGCTACTTTCTTGCTTCTCTGCTGCCTCTTACTATTG  
ACCATTTG

GCTGATCTCGCAAGTGCATTCCCTAGACTTAATTCATATCTGCTCCTCAACTGTCGATGATGCCTGCTAAAC  
TGCAGCTTGACGTACTGCGGACCCTGCAGTCCAGCGCTCGTCATGGAACGCAAACGCTGAAAACTCCAAC  
TTTCTCGA

ACGGCATTAAACTTTTCCAGCAAGTCCTTCCCTCACCTGATCCTTCTCATCGTCAGGAATCTCTAGCCCAGG  
CCATCCGAACCACTTGAAAGTGTACGTCTTCTTCAACCCTTCCAACGCCGTGACCAGCCCTCCGGACGACA  
TTGCGTAC

AGGTACCATTGAGTTCTGGGAATTATCATCGAGCTGTATACCTAATGAATCGTGGGGTTTGTCTTCGTCTT  
TGTTGTCTCCAGGGATGAAGAAGCAGCAGCGGCAGCAGCGGCAATAGCATCGTCATCATCTTGCTGCTTT  
TGTTGAAG

GAGTTCTGGGAATTATCATCGAGCTGTATACCTAATGAATCGTGGGGTTTGTCTTCGTCTTTGTTGTCTCC  
CAGGGATGAAGAAGCAGCAGCGGCAGCAGCGGCAATAGCATCGTCATCATCTTGCTGCTTTTGTGAAGAA  
GTTGTTGT

TCCTCACCTTCTTGAATATCGTCTAATTTCTCAGACTCTTCTTCAGTGGCTTCTACTCTCTTATGATGTTG  
CAATTTCTGAGTCTGGTATCCTCTCCACCACAATATCCTCCAACCTTAGGCGTAGCAGGGCTGGTGTCTTCTT  
GGTCTTCT

GGTTCAGGGATATAGGTTATCACCATACTCCGTACACGAACTGTCCAACCTTGTCAGCAGATTAGATAGG  
TGTAATGGAAATTGTGTACCAGGCAAATTCCTCCTTGAGTGATCTAGACAACCAAATTTGCCAGGCAAC  
CTGGATAA

TGATGACGAAGATGATGAAGCAGCAGCAGCAGAAGAGGTGGTTTTAGAGGAAGAGATGGAAGACTGGCTTT  
CACTCGTTTTCAACTGCTTGAGCACTGCTGGACAAAACAGTAGAGTCTTTAGTGTAAGAAGAAGGAACAGCA  
GGACCGAC

AAGACTTGTTATTGTCTGATTTGTCTAGATTCTTCGAAATTTCCAGCCTTCCAGAGGCTTCCGCTGAACAAT  
ACCGGATGACAAGAGTATCCTCCACAAACAATCTCGTGGTCTGTTTTATCCATACTAAGGACCTGTAAGGTAA  
ACCTTCCG

CTTGTTCTCTGGTTCTTCTTGGATTATACTTTGACCGAAGTTTGGAGTGGGAGTAAATTTCTTCAATCCA  
GAGGAGGAGTGAGTTAAAGGTGGAGGCTGCTGTGGCTGTTGTTGTTGTAATGTTGCTTGGCCATTGTTATT  
ATCATATG

GTTTTCAAAGCTTTGAAAGCTGGCTTACTGACAGAACTTATTTAGAGGCACAGTTTGTCCGTCAACACAAG  
AAGAAATTTGCGTCTTTTCACTGCTGACTTCTGATGTAGAAGAGAGATTATGGAATTAATCACCTCTGGTGA  
TGTTTTATA

TCCACAGTACCGAACTGACCGTTGATTCTACCGACCAACTCATTGACCACAGATCTTAAATATTGGTACTC  
TTCCACATCTCCACGACTTGGCACTGCAACCTGTACCAGAACAACCTTGCCCTCCATTCTGGATGCTCGT  
TCAGAAAC

GACCTTAAGTTTGTTCAGCTTATTTGATAGTTTACTGGCTATGACACTTCCACCAGCTGTGACTGCAGG  
AGCGTTGAGTAGGGAGGTGGAGGAAGATTGAGTCGGTTGGGCATAACTTGGATAGTTCCTTTTCTGCTCCA  
GTAAACTG

GCCTTCGGAATATTTAGCTTTAAATATGGCTTCCCTGAGAGCTTTCCTCTATTGCTGTTTCAAGTTGGTGCAG  
GTGATGGACCATCGCCTGCACTGGAGCTGGACCTTCCAAAGTATTTGATATAGCAACTGTGCGGTGTATCT  
TTTGCTTT

CCTGGGACAAAGTAGGAACCTCTGGACCAGTCAACGTTAGTGTAGGAAGATGATGACGAAGATGATGAAGC  
AGCAGCAGCAGAAGAGGTGGTTTTAGAGGAAGAGATGGAAGACTGGCTTTCCTCGTTTCAACTGCTTGAG  
CACTGCTG

AACTCCATCTTTTAAACATGGCGCAAATTCGCAACAGCTGTATCAGAGCCTCACACCACAACAATTGCAGA  
TGATTCAGCAACGACACCAACAGTTACTGAGGAGTCGTCTACAACAACAACAACAACAACAACAACA  
TCACCGCC

TCCAGATTCGAAGAAATTGTCAAGGAAACCTCCAACCTTATCAAGAAGGTTGGTTACAACCCAAAGACTGT  
TCCATTTCGTCCTCAATCTCTGGTTGGAACGGTGACAACATGATTGAAGCTACCACCAACGCTCCATGGTACA  
AGGGTTGG

TGAATTCACGGTAGTCTTCTTGACATCAATACCAGATGTACCTTCAAACACTTGCACAATGGCTCTATCT  
CCTCTAATTTCCAAAACCTTGACCTTGTCTCACGGTTCATCTGGCAATGTCAAATTAACAATTTCTGTTGTA  
ACGTGGGA

GTAGTTTCTGGGTCAACAACCTTCAAGGTTTTCAGCAATGTGAGTACCGTCAATGTTGGAAACGAAGTGGAC  
ATCCAAGACACCAGCGTAGTGCTTCAAAGCCTCAGTGACCATGACTGGACCCAAATCGGAACCACCAATAC  
CGATGTTA

CGCAGTGGCACTCGAGGACAAGGAGTATCCAAATTGGTTATGGAGCGTATTGGATAGTGATCACGTTGTGCG  
AACATGCGGCTGAGGACCCAGAGGGACAGGCTCTCTTAAAGAGAAGAAAGAACATAAGGAAGGCGAACAGG  
CAGCGAAT

TATTGCTCTCTGGAAGCTAGACGGTAACGCAACGATCGACATGGAAGCTGTGCGCTGATTTTTCAGCCAAT  
CTGTCCATTCTTTCTATCAGTTCCTGTGTGTCAGCAGACAGGTCTGTCTGGAGCCACAGCATCCAACATG  
CTGGCCCT

TAGACGATGCTGAAACCGGTGGTGATCACACCAATGAATCCCGTGTAGATGAATGTTGTGCTGAGAAAGTG  
AACGACACTGAGACTGGCTTGGATGTGGACAGCTGTTGCGGCGATGCTCAAACAGGTGGTGACCACACCAA  
TGAATCCT

GTAAGAGATGAGATCCGTAACCTTATTCACACAAATGGGGGATCTGGCGCTGGAGGACGCTGTGCTCAAAC  
AGGTGAGCTGAGAAGAGGAATTAGGCTGCTGGCACCAGACGACAAGGATGTCAAGTACCGCATGGATTGGG  
CCAGACGC

GAAATCCTTAGAAATTGTTGTCATTGTTTCTATCCTGTTGACGATCGTCAAACAAGATCTGTCTGTTGAGG  
ACGACAGCCCGTTTGAAGGAAGTTCCTCTTCTGCTGGTCTTCCAAGTCAAATACGAACACAACGCAGAT  
TCGACCAC

GATTTGATGACTGTCATCATGGTGAGATATTCGTTGTTTCTTACTTGGGAACTGGTGCTGTTGCAACTGTT  
GCTGCTCCGTTGTCTTTTTCATGTGAGCAGAACTAAAATCTTGGTCTTGGTCAAGATCTCGATTATCCTTC  
ACCATGAC

TATCAAGGGATGAGCCTGTTAAAGATTTTATGATCACTTAAGTTTTCGGAGCGGTAGTGATTTCAAATGCTGG  
GGTGACGAGAAGACAAGTTCATGTTTCAATTCATCCAGTGTGAACCTCAGTTAATTCCTTTACTTCTACCAC  
CTCTTCTT



TTGTCCGAAGACAAGAAGAAGTTGGATTATGTTTTGGCTTTGAAGGTTGAAGATTTCTTGAAAGAAGATT  
GCAAACCTCAAGTCTACAAGTTGGGTTTGGCCAAGTCTGTCCACCACGCCAGAGTTTTAATCACTCAAAGAC  
ACATTGCT

ATTCGTTCTCTATCGAGAACTCTAATTAACTCTACCAAGGCCGCAAGACCTGCCGCTGCTGCTTTGGCTTC  
CACCAGAAGATTGGCTTCCACCAAGGCACAACCCACAGAAGTTTCTCCATCTTAGAGGAAAGAATTAAGG  
GTGTGTCC

AAAGTCGATAGTATCTTTAACTAATTCGTACTIONACTAAAACATCGTCGGTGGCTTCCAAACCACACTTCT  
TTCTCAATTTTTGGATTCTGTTGACCAGCTCTCTTGCGAGACCTTCACTCTTTAGTTCAGAGTAAATATTT  
GTATCCAT

CGCAGCGGTGGCATCAGTAGTTTTCGGTAGTAGCCGTTGGTCTTGCAGGCATGGCAGGAGGAGGGCCCTCTT  
CATCCTCATCTGGAGCTTGGTCTTCTTTACTTTGCATCATAACGAGCTCTATCATTGTGTTGAGGAGGTGGT  
AAAAAGTT

AAAGAGAAAAGGACGTGTAAGTGGTTTTTCATACAAATGAAGGATGCAAAGACGAGGAGGAGGAGGATGACA  
TTGACCCACTGCACAAGGAGAATGGCATTAAACACGCCATCGCAGCAATCGCAAAATTACGGTATGTTAGAG  
GCTAAACA

ACTCAAGCTTTGAACTTCGCCCTTCAAAGATAAGATTAAGTTGATGTTTGGTTTTCAAGAAAGAGGAAGGCTA  
TGGTAAATGGTTTTGCAGGTAATCTGGCTTCTGGTGGTGCAGCTGGTGCTTTTTCGTTATTATTTGTTTTATT  
CTTTAGAT

GCTTCTGCAGGAACAGTAGCAGTAGAAAAGTTCTATGGTCTCAGCAGTGCTTTGGTCATTTGCTTTTTGTTGT  
TGAACCTTCTGATGATACAGTTGGTTGGACACTAGATGACTCTGGTCCGTATTAAGCGTTTTGTAGAAG  
GAGAAACA

CAAATTTTGGTTTTCTGGTGAAATTCATCTACCTTGAATGAAGAGAGTAAAGACAAGGTCAAGGTCAAGGA  
GAGCAGCTCTGGTAAGTTCAAGAGAGTCATCACTTTGCCAGACTACCCAGGTGTGGATGCAGACAACATTA  
AAGCAGAC

GAGCATGTCAAAGATGTTGAAGTTGCTGTTAAGTTGTCTGAATGCAATCCATGAATAATTGTAGACCAAC  
CCTCCCAGCTTTTCGAGGCCTGTTTGATTGAAGTCGTGTGTTGGTAGCTTCATCTACTTGTAGGAATCTA  
GTAACCTCA

CAGCTGCTAATACTGCAGCCAATGCAGTTTTCTGCCACCGCTCAATCGTCTGCTAATGGTGGGACTCCAATG  
TCAAAGTCATCCTCTTCAACATCCCTCAACTCCACTCTCCGTTGATGACAGCAATGGAAGACCCACCATC  
CCCACGTT

ACCAAGTTGGACCAAGTCTGGGGTTCCGAAACCGTTGCCTCCTCCAAGGTCCGGCTACACTTTGCCATCCCA  
TATCATCTCCACTTCTGATGTCACCAGAATTATCAACTCTTCCGAAATCCAATCTGCTATCAGACCAGCTG  
GCCAAGCT

CTGTGGTTGTTGCATAAATCCATCGGTGTTGAATGTGTTTATCATCTGTGGTTGTTGCATAGCACCACCAG  
TATTGAAAGTAGTCATCATTGGAGCTCTTGCATAACACCACCAGTATTGAAGGTATTCATCGTTTTGTGGT  
TGCTGTTG

CTGTGAATGTTGAGCACCACCCACTGCAGCACCATTAGGACCTCTGAAGACCATTTGACATTTTTGAG  
TACCACCAGACATGTAGTGAGTCTTTGCAGCGGAATTGACAACATGATCGATAGCTTGCATAGAGAAATTG  
AACGACAT

CTTACCTTCTTGGCAATGTGGCACAATAAATCTGGTTATGTGTCTTCATTTGGTAATCACTGGGATGTTA  
CTGGGGCAGCAGCAACTCCGTGTGTACCCCTAACTCCGTGTGTACCCCTAAAGAACCTTGCCTGTCAAGGT  
GCATTGTT

TGATGAACAGGAACTAAATCTTTGTGGTTAGATAAAGGAACTAAAAGAACCTTTGTTGGAGCAACCAAAGG  
TGGGAAGGAAAGAACAACCTTCTGGCATTGTCTTCTGGTCTGTTCCAGAAAGAGTGCTCAAAAACGGAGTAGA  
TGATACGG

TGAAGGTTGAAGATTTCTTGAAAGAAGATTGCAAACTCAAGTCTACAAGTTGGGTTTGGCCAAGTCTGTC  
CACCACGCCAGAGTTTTAATCACTCAAAGACACATTGCTGTTGGTAAGCAAATCGTCAACATCCCATCTTT  
CATGGTCA

GCTTCCAAAACAGAAGAATGTGAGAAGGTTTCCACTCAGGCTAATTCTCAACAGCCAACAACACCTCCCTC  
ATCTGCTGTTCCAGAGAACCATCATCATGCCTCTCCTCAAGCTGCTCAAGTACCATTGCCACAAAATGGGC  
CGTACCCA

TAACTTTTAGCGTTCACTTCAAATGCACACCACGAGAATAAAGTACTAGCGTCAGTTGAGGTCAAGTTCAA  
ACCCTTGTTCCTTGTTCATCTCTTGGCAATGTCATCCAAGTAGGTTGTGTCGTATTCAATTTACAATGT  
CATCATTG

TGTTCAATCCAAATATCTTTTATGCTCTCCCCATGGTCCTGCTCCATGCAGTGCCATCATCCGTCAACA  
TAGCTTGGCGTTCTGGTCTCCCCAGGTACCACTTCTTTTCTATCCACCAGGTCCTGTACCTGATGATCTT  
GTTTCAAC

CAGCAGCAGCAGAAGAGGTGGTTTTAGAGGAAGAGATGGAAGACTGGCTTTCACTCGTTTCAACTGCTTGA  
GCACTGCTGGACAAAACAGTAGAGTCTTTAGTGTAAGAAGAAGGAACAGCAGGACCGACAACGGTATTGGT  
GGAATCGG

ATTTAGACAGTGACCAGATCTTTAGCTTCACTAAAGAGTACGAAGACAAGACGCTGTTTGCTGCTTTGAAT  
TTCAGTGGCGAAGAAATTGAATTCAGCCTCCCAAGAGAAGGTGCTTCTTTATCTTTTATTCTTGGAAATTA  
TGATGATA

CTCCAGTAAAGAGCATGTCAAAGATGTTGAAGTTGCTGTTAAGTTGCTCCTGAATGCAATCCATGAATAATT  
GTAGACCAACCCTCCCCAGCTTTTCGAGGCCTGTTTGATTGAAGTCGTGTGTTGGTAGCTTCATCTACTTGT  
AGGGAATC

GTTTCTTCTTTCACACAACATGGCTTCTACTTTCGAACACGTTCCCTCCAAGCCAAAGCAATTCTTCCAACA  
ACCTTCCAACCTTCTAGACATGCATCCATTGTGGAGATGCTGTCTACTCCGCCATTGCTGCCCCACGTTCAA  
GTGAACGA

TGGCAAAAGAAACGTATTATGAAAAGATTAAGCATTGCCAAGGCATCGCTCGATCTCAAACATCATACTTC  
TGAACCTCAACTCTAGCACATCAGAGCCAGACAGTCAAAGACGGTCCAAAGATAGTTCTGTGCCCTAATAA  
TTGATAGC

GGTCAAGTGATCTTGCCAGCGCCCGGAGAGCCTCTGTCAAATGGCTTTGGGCAACAGCAACAGCAACAGCA  
ACAGCAACAGCAGCCTCTGAACCAAAAACAACGCTTTGTTGCCACAAATGAACGTGGAAGGAGTTTCTGGGA  
TGGCTGCG

AAAATTGATATTACAGCATCAATTGACATCAATCATTAAATCATCATTAGCTTCTGTGGATCAACAAACT  
CCCTGCTGGCTCCTGCCAATAGTTCTTCTAATCTCAGGACCGATATCTTTATGGCCTCTTTGACGAACA  
GTTTCCAA

TTTACGCTAAGCACATTTATGAAAACATAGACGGCTACAAGTGCCTTCCGTCAAAGAGGCCTCTTGAACAA  
CTTTCCCCCAGGAACTCCACCAGGGAGATCGCCCCAATAAGGCTAGCTTTTCCAACAAGAAGGCAATCCT  
GGAGAGTG

CCTGTACCAGAACAACCTTGCCCTCCATTCTGGATGCTCGTTCCAGAAACACTTCCATGGCGTGCAACTTC  
TGAGGCACACCTTTGATGTAATCCAGCCTGTGACACCAACTATGATCTTGCAGCCCTTGAAAGTTTCCTT  
CAATTGTT

TGTTTCATCATCTGTGGTTGTTGCATAATTCCATCGGTGTTGAATGTGTTTCATCATCTGTGGTTGTTGCATA  
GCACCACCAGTATTGAAAGTAGTCATCATTTGGAGCTCTTGCATAACACCACCAGTATTGAAGGTATTCAT  
CGTTTGTG

AGATGATTGAACTGGTTCCCGAACATTGTTGTATTGGAAACAGCTTGACGAAGCAGCTCCAGATAAAGGTG  
TTGAAGACCTCACTTCGTGACGATTTCGGCTTCGATGTTTCCTCACGTTGTGATGTTACTTCAGGATCTTTA  
TCGTTGTG

TATAACGAAATCAGCTCTTCAAATGGTATAGACTTGTGCATGAAATGGATGGGGACGAATTCCACAGTACC  
GAACTGACCGTTGATTCTACCGACCAACTCATTGACCACAGATCTTAAATATTGGTACTCTTCCACATCTC  
CACGACTT

TGTAATTTAGCAATATCCCAAGAACAATCATCGAAATGTCCCGTCCACAAGTTACTGTTCACTCTTTGACT  
GGTGAAGCTACTGCCAATGCCTTGCCATTGCCAGCTGTCTTCTCCGCTCCTATCCGTCCAGACATTGTCCA  
CACTGTTT

AGCTATGGAGCTTCACCCATGCAAGGTCAGCCTCCAGTCGGTGGACAACCGCCTGTGCCTGTAAGAATGCA  
GCCACAGCCACCGCAACCAATGCAACAGGGAAACATCTATCCGATTGAGCCTTCTCTTGATTCTACTGGCT  
CAACCCCA

TCACATGATTTTTCTACAAATAATCTTAAACGTACGATATCGTGGAGAGTCTGTTCTCACTAAGTGATAG  
CTTGTGTTGTGGTTGACACTGTCAAGTTTCGAAGAAGGTCACAGTATTTTGTGTGTTTCAAGTAACT  
CTACCAA

CAACAACAACAGCAGCAGCAGCAGCAGCAGCAGCAGCAAGGACAAATACCGCAATCTCAGCAAGTTCTCAAGT  
TAGATCCATGAGTGGACAACCTCCCACCAATGTTTCAGCCACTATTGGCCAACCTTCTCAACTTCCAAAAT  
TAACTTA

AACGTATTATGAAAAGATTAAGCATTGCCAAGGCATCGCTCGATCTCAAACATCATACTTCTGAACTCAAC  
TCTAGCACATCAGAGCCAGACAGTCAAAGACGGTCCAAAGATAGTTCTGTGCCCTAATAATTGATAGCAG  
TGGTTCAG

CAACAACCTTCTAGGTAGTAGTCTAAGTTGTATTTCTTACCTGGCTGAAGCATGTCACCAGAGTAACAAACA  
GTAGCTTCGACAACACCACCGCCTTCTTGACAGCATTACACCAACTTTTAATTGTTCTAAATCATTCAA  
GGCATCAA

GAGGGTTCGTGGGCTTTGAACAGGATCTAAGGACGATGAAGTGCCTGCAACCGAAGAAGGTAGGTCATGA  
TAAGTGGCATCTGAGTCGAAACTTTGAAGACTTCCACAAGCCATAAATTCGGCTATGTTTCTCCTCTTC  
ATTCCAAT

ATCTTCCTTGAAAAGTGTCTCTGACTCTTTACAATTCTCTTCCAACGGTGACAACACTACTTTGGCCTTCG  
ACAATTTGGTCTGGGCTAACAACATCACTTTGAGAGATGTTAACTCTATTTCTTTTCGGTAGTTTGCAAACT  
GTTAACGC

GGTTTTTCTTTGCCGCCGATGAAGAGGAAGAGGATTTCGGTTGTCTTAGAATTGTTTCGTGACATTCTTCAC  
TCCAGCATCACGATGGCGGTGGTGGTATGATGATGGTGGGGCTGAGTAGCATCTGTAGTAGTAGTAGTAG  
TAGTATTG

ACCTATTAGCTGGCAAAAGAAACGTATTATGAAAAGATTAAGCATTGCCAAGGCATCGCTCGATCTCAAAC  
ATCATACTTCTGAACTCAACTCTAGCACATCAGAGCCAGACAGTCAAAGACGGTCCAAAGATAGTTCTGTG  
CCCCTAAT

AGATCCGTAACCTATTACACAAATGGGGGATCTGGCGCTGGAGGACGCTGTTCGTCAAACTAGGTGAGCTG  
AGAAGAGGAATTAGGCTGCTGGCACCAGACGACAAGGATGTCAAGTACCGCATGGATTGGGCCAGACGCTG  
CACAGACC

ACAATCAGCAGGGCTACAATCAGCAGGGATATAACCAGCAGGGATATAACCAACAAGGCCATCAACAACCA  
GTCTACGTCCAACAACAACCACCCAGAGGGGTAACGAAGGTTGTCTGGCTGCATGTCTGGCTGCATTATG  
TATATGCT

CCTGCAAGGGCATGTGCGGTTGTTGGAGCGATTGTAGCCAAATCGTGGGTTCTGACTCTTGTTGCAAGTAG  
AGATTGATGAGCGTCTCTCCAGGTGGTGTCCATCAGTAGAGTACCATTGAACTGTCTGACTTGCTTGCCAA  
ATTCAGAT

TACTGCTCAAGCTGATTTGGACAAAATCTCCGGTTGTAGTACCATTGTTGGTAACTTGACCATCACCGGTG  
ACTTGGGTTCCGCTGCTTTGGCTAGTATCCAAGAGATTGATGGTTCCTTGACTATCTTCAACTCCAGTTCT  
TTATCTTC

TGTTGAAGCTTTTCAGTGAATACCCACCATTAGGTAGATTGCTGTGAGAGACATGAGACAAACTGTCGCTG  
TCGGTGTATCAAGTCTGTTGACAAGACTGAAAAGGCCGCTAAGGTTACCAAGGCTGCTCAAAGGCTGCT  
AAGAAATA

CATGTGCGGTTGTTGGAGCGATTGTAGCCAAATCGTGGGTTCTGACTCTTGTTGCAAGTAGAGATTGATGA  
GCGTCTCTCCAGGTGGTGTCCATCAGTAGAGTACCATTGAACTGTCTGACTTGCTTGCCAAATTCAGATGG  
TCCCTTTT

CACCTGGGACATCAGCTGTTCCAGAGAACCATCATCATGTCTCTCCTCAACCTGCTTCAGTACCACCTCCA  
CAGAATGGACAGTACCAACAGCACGGCATGATGACTCCAACAAAGCTATGGCTTCTAACTGGGCACATTA  
CCAACAAC

GGGTTAGATGTAGACGATGCTGAAACCGGTGGTGTATCACACCAATGAATCCCGTGTAGATGAATGTTGTGC  
TGAGAAAGTGAACGACACTGAGACTGGCTTGGATGTGGACAGCTGTTGCGGCGATGCTCAAACAGGTGGTG  
ACCACACC

GCTCACAGCATATAACGAAATCAGCTCTTCAAATGGTATAGACTTGTGCATGAAATGGATGGGGACGAATT  
CCACAGTACCGAACTGACCGTTGATTCTACCGACCAACTCATTGACCACAGATCTTAAATATTGGTACTCT  
TCCACATC

GCTAGGTGTGAGCATTGGTGTATGATGAGCAGATGATTGAACTGGTTCCTGAACATTGTTGTATTGGAAAC  
AGCTTGACGAAGCAGCTCCAGATAAAGGTGTTGAAGACCTCACTTCGTGACGATTCGGCTTCGATGTTTCC  
TCACGTTG

TGTTGTCTTGGTAGGGGCTGTAATTGCTGCTGCTGTTGTTGTTGTTGTTGTTGTTGTTGTTGTTGTTGTTG  
TTGTTGTTGTTGTTGTTGTTGTTGTTGTTGTTGTTGTTGTTGTTGTTGTTGTTGTTGTTGTTGTTGTTG  
CCTGTGCT

TGGACCGATCCCTCCCAGTGTAGAAATTTCTTTGGCTATAATTAGCAGGTCCTTTGGGTTGGTCCTGTTGT  
TGCTGCTGTTGTTCAACTCTAGATTGATACTGAGATTCATCTGGAAAGGTATTCCTTGTGTACCTGTTTG  
ATTTTGAG

ACACATTGCTGTTGGTAAGCAAATCGTCAACATCCCATCTTTCATGGTCAGATTGGACTCTGAAAAGCACA  
TTGACTTCGCTCCAACCTTCTCCATTCCGGTGGTGTAGACCAGGTAGAGTTGCTAGAAGAAACGCTGCTAGA  
AAGGCTGA

ACTGGTTCCTGAACATTGTTGTATTGGAAACAGCTTGACGAAGCAGCTCCAGATAAAGGTGTTGAAGACCT  
CACTTCGTGACGATTCGGCTTCGATGTTTCTCACGTTGTGATGTTACTTCAGGATCTTTATCGTTGTGCG  
ACCACGTA

AATATATTTAGCAACATTGGAACCTCATCTTTTAAACATGGCGCAAATTCGCAACAGCTGTATCAGAGCCT  
CACACCACAACAATTGCAGATGATTCAGCAACGACACCAACAGTTACTGAGGAGTCGTCTACAACAACAAC  
ACAACAACAA

TAAATGTGGTCTCCATGTTGCTCACTCTTTTCTAAAGAACTTGCACCGGAAAGGTTTGCCAGTGCTCCTC  
TGGCCGGGCTGCAAGTCTTCTGTGAGGGTGATGTACCAACTGGCAGTGGATTGTCTTCTTCGGCCGATT  
ATTTGTGC

ATTGCCATACATATCCTCCAGATGGAAGGGTCCCCAAGTGAAGGTTTACCGTATCCTCTGTTTGCTTACG  
CCTCCTTCTGTGTTTCCAATCTGCGTTTCTCCCTGTTGAAGAAATAAGAAAGTGCCCCACCGACTGCTAGG  
AATAGAGC

GTTGTTGCATAGCACCCCAAGTGTAAAGTGTTCATCATCTGTGGTTGTTGCATAATTCCATCGGTGTTG  
AATGTGTTTCATCATCTGTGGTTGTTGCATAGCACCCCAAGTATTGAAAGTAGTCATCATTGGAGCTCTTG  
CATAACAC

AGCTGCTTTTACCAAGTTGGACCAAGTCTGGGGTTCGAAACCGTTGCCTCCTCCAAGTTCGGCTACACTT  
TGCCATCCCATATCATCTCCACTTCTGATGTACCAGAATTATCAACTCTTCCGAAATCCAATCTGCTATC  
AGACCAGC

GTTGTTGCATAGCACCCCAAGTATTGAAAGTAGTCATCATTGGAGCTCTTGCATAACACCACAGTATTG  
AAGGTATTCATCGTTTGTGGTTGCTGTTGTTGAAGAACGCCCCCTGTACTTAAAGTATTCATGGCTCCACC  
AGTGAAC

GAGCTGTATACCTAATGAATCGTGGGGTTTGTCTTCGCTTTGTTGTCTCCAGGGATGAAGAAGCAGCAG  
CGGCAGCAGCGCAATAGCATCGTCATCATCTTGTCTTTTTGTTGAAGAAGTTGTTGTTGTTCTTGAATA  
GCAGCAGC

CCCTACACCGGTTTCAAAGCTTTGAAAGCTGGCTTACTGACAGAACTTATTTAGAGGCACAGTTTGTCCG  
TCAACACAAGAAGAAATTTGCGTCTTTTCACTGACTTCTGATGTAGAAGAGAGATTATGGAATTAATCA  
CCTCTGGT

TTGCAATTGGCTCCAGGTGCTCACTTGGGTAGATTCGTTATCTGGACCGAAGCTGCTTTTACCAAGTTGGA  
CCAAGTCTGGGGTTCGAAACCGTTGCCTCCTCCAAGTTCGGCTACACTTTGCCATCCCATATCATCTCCA  
CTTCTGAT

GTTTGAACAGAAATGACAGAAATCAAATAACAGCATTTATAAAGTGAGGCACAACCTTTGACACCATGTG  
ATGCAACAGCAATGACAAATGGGGAGGCATGGGATCCAGAGGAGTCACTAGACCCTAATAATTCGTCCTG  
TTGTATGG

GGTCTACCAGAACCGTCAAAAATTTTACCCAACATGTCTTCAGACACAGGAATTTCAAACCTCTCACCAGT  
GAATTCACGGTAGTCTTCTTGACATCAATACCAGATGTACCTTCAAACACTTGCACAATGGCTCTATCTC  
CTCTAATT

AATTCATAAACAAGGTAGTGTAAGCGTCATCGGTGTAAGTCATGACTTGTGATACACACTCAAGACATC  
AGATGGAATTTGGAATCCACTGTTGCCAGTTTCTAGACCCAAGTAGTCAGAAAGATGAGAGTTGATGTAC  
CGATAATA

GCCCGGAGAGCCTCTGTCAAATGGCTTTGGGCAACAGCAACAGCAACAGCAACAGCAACAGCAGCCTCTGA  
ACCAAAACAACGCTTTGTTGCCACAAATGAACGTGGAAGGAGTTTCTGGGATGGCTGCGGTTACGCCTGTC  
TATGGCCA

CTCAATAGATCGTCATCACTATTCTCTAAGTCTCATACTGCCTTCTCCTTCTTCTGCTTTTGCACAGGAAG  
GCCATTTTCAAGTTGCGCTGCACCTTCTTGTCTTCTGCTCCTCGTCATCTATGTAGGCAACATTTCTCA  
ATAGCCTA

CAGCAACAGCAACAGCAACAGCAGCCTCTGAACCAAAACAACGCTTTGTTGCCACAAATGAACGTGGAAGG  
AGTTTCTGGGATGGCTGCGGTTACGCCTGTCTATGGCCAAGCCATGTCAAGTACTACAAACATGCAAGATT  
CGAACCC



TCTGCGATTTTCATCGCTCAGGAAGATGGGTACGGCATTAAACTTTTTCCAGCAAGTCCTTCTCACCTGATC  
CTTCTCATCGTCAGGAATCTCTAGCCCAGGCCATCCGAACCACTTGAAAGTGTACGTCTTCTTCAACCCTT  
CCAACGCC

GCTATTGAAGGTTCTTACATTGATAAGAAATGTCCATTCACTGGTTTTAGTTTTCCATCCGTGGTAAGATCTT  
GACCGGTACCGTCGTCTCCACCAAGATGCACCGTACCATTGTCATCAGAAGAGCTTACTTGCATTACATTC  
CAAAGTAC

ATGGCTTTGGGCAACAGCAACAGCAACAGCAACAGCAACAGCAGCCTCTGAACCAAAACAACGCTTTGTTG  
CCACAAATGAACGTGGAAGGAGTTTTCTGGGATGGCTGCGGTTTCAGCCTGTCTATGGCCAAGCCATGTCAAG  
TACTACAA

GGTATACTTCTGGTACATCCTTTGGAGGCTTTTTGTTTTCGAACTTCCATCTCCAGAATCCGATCGACTGGAT  
GATGACTGTCCACCTCCAGAAGCGGAGCTTCTGGAGTTTTTCGAAGCTTACCTTCTTGGTCTTATTAAC  
AATTTTCAT

TATCGAGAACTCTAATTAACTCTACCAAGGCCGCAAGACCTGCCGCTGCTGCTTTGGCTTCCACCAGAAGA  
TTGGCTTCCACCAAGGCACAACCCACAGAAGTTTTCTCCATCTTAGAGGAAAGAATTAAGGGTGTGTCCGA  
CGAGGCCA

GAACATTGTTGTATTGGAAACAGCTTGACGAAGCAGCTCCAGATAAAGGTGTTGAAGACCTCACTTCGTGA  
CGATTCGGCTTCGATGTTTTCTCACGTTGTGATGTTACTTCAGGATCTTTATCGTTGTGCCACCACGTAGA  
GAATCCCT

TTGTTGTTGTCAAACGAGAATTCCTGTTGAGTCTGAGTCAGAGACAAACATCGGTCTCATCTTCTCCCA  
AAGTCGAGATGCAGGCACCAAGAGCAGCCACGAAGCAAATACATAAAGGTGAGATAGAAGGTTAATGAAC  
TTGAGTTT

TCATTGCAACGTGCAATGTAGCACCACCCCAACATTCTAAAGCGAAAGCACCTGCAAGGGCATGTGCGGTT  
GTTGGAGCGATTGTAGCCAAATCGTGGGTTCTGACTCTTGTGCAAGTAGAGATTGATGAGCGTCTCTCCA  
GGTGGTGT

GGTGTGTGGTGGGTGGAGCGCTCGATAATCCGTTTGAAGATGACATGGACGGTGTGACTTCAACCAAGC  
TTTTGAAGGAACAGATGATAACGAGGAGGCCAGTGTGAACTTGATTTACAGGATGACGAAGATCATAAGT  
TCCCCATT

TACCCTGATCCATGAAACTGGATAAGTCATTGGCGTCTTCATCGTGGCCAGCAAGCAGGTCATCTGCTTCA  
TCCAAAATTTGATCATGGATCAGGGATGAGTAGCTTGGACCTGTTCTGTTTCCAAACCTTCTCTAATTTT  
GGAGATAG

AATTATCATCGAGCTGTATACCTAATGAATCGTGGGGTTTTGTCTTCGTCTTTGTTGTCTCCAGGGATGAA  
GAAGCAGCAGCGGCAGCAGCGGCAATAGCATCGTCATCATCTTGCTGCTTTTTGTTGAAGAAGTTGTTGTTG  
TTCTTGAA

GGGCAGCAGAAGAGGATGGAGCGGCAGAGGATGTAGCTTCGGAAGAAGATGCAGCCTTGAAGAAGATGCA  
GCCTCGGAAGAAGATGCAGCCTCGGAAGAAGCTGGGGAAACGGAGGCAAGAGCAGCAGGATTTGAGAACT  
CAATCTTG

CTGAAATTGAGAAACGTGAAAACACAAGAGAAAATTGGAAGCTGCCGAAGGAGATGCCACTGTTGTTACT  
GAACGCTCTGATTCTGCTTCTTTCTTGAAGAGAAGGAAGAACCTCAAGAGAATCATGATAACAAAGAGGA  
GCAGTCGT

GTCCATGTCACTCAATAGATCGTCATCACTATTCTCTAAGTCCTCATACTGCCTTCTCCTTCTTCGTCTTT  
GCACAGGAAGGCCATTTTCATCAAGTTGCGCTGCACCTTCTTGTCTTCGTCTTCGTCTATGTAGGCA  
ACATTTCT

CAACGATCGACATGGAAGCTGTCGCCTGATTTTTAGCCAATCTGTCCATTCTTTCTATCAGTTCCACTGTG  
TCAGCAGACAGGTCTGTCTGGAGCCACAGCATCCAACATGCTGGCCCTTTTTTCTTTCTTTGATTCAA  
GTCCATAG

TCACTCAAAGACACATTGCTGTTGGTAAGCAAATCGTCAACATCCCATCTTTCATGGTCAGATTGGACTCT  
GAAAAGCACATTGACTTCGCTCCAACCTTCTCCATTGCGGTGGTGTAGACCAGGTAGAGTTGCTAGAAGAAA  
CGCTGCTA

GATACTGTTCCATTTGTCTTTGGCGCTGTGTGGTTTCCAGTTCCTCAATGTTGATTCTAATGGATGTCTG  
TCATTCAATTGTGTGGAAAGAGGTAAGTGCACCGCTTCTTGCTGGCGTAATGTGTCTGGCAAGGAGGCAC  
TGCAGATG

CAGACACCAGAACCGGCAGTCCCCCTTGGTTGTTTCATGAATGTACAGTTGCTAGTAGAGCCTGGGACAAA  
GTAGGAACCTCTGGACCAGTACCCTTAGTGTAGAAAGATGATGACGAAGATGATGAAGCAGCAGCAGCAG  
AAGAGGTG

AACGAAAAGCGTTACGCCACTGCTTCTGCTATTGCTGCTACTGCTGTTGCCTCTTTGGTCTTGGCCAGAGG  
TCACAGAGTCGAAAAGATTCCAGAAATCCCATTGGTTGTCTCCACTGACTTGAATCTATTCAAAGACCA  
AGGAAGCT

TGCTATCCTTATCCTTTCGAATGCCGGTATCTTTCCAAATCGTGCCTTTGCTTGAACAGTCTGTGTGTT  
TCATGCTTGGCATTGACCGGTTGACAGTTCGTGACCAGTACTGTGGCGCTTATTCTCAGTTATTGCGGT  
GGAAGCAT

CGGTGACTCCTTGTGGCTGGCCACAGTACCAGGCTTCTCTTTCTGGAGGCAGATTGTTTGGAGTTCATT  
TGATGTGATGCTTCGGTCATCGCATAGGCCTCCAAGACAGGTGCATTGAATTCCTTCTCCAGCTTATGGAA  
CGTTGCTG

GGAGCGACAGAAGAAGAAACGGCCTTAGAAGATGATTCGGCAGATGATGATGGGGCAGCAGAAGAAGATGG  
GGCAGCAGAAGAGGATGGAGCGGCAGAGGATGTAGCTTCGGAAGAAGATGCAGCCTTGGAAAGAAGATGCAG  
CCTCGGAA

TTCAAATATTTGTTGTAAGGTTCCCTTTTATAACAATAAAGCAGCTGCACCTGCAACAACAGCACCGAA  
AGAGGCAGCGCCTGCATTGACTCTTTGACCGGCATTGGAAGCAGTTTCGACTGTAGAAGTGTGACAGAAG  
AGGTAGTT

TGCCGTATCCACCTTATCAAATGTCACCTATGTACGCTCCACCTGGGGCACAATCACAGTTTACACAATAT  
CCACAATATGTTGGAACACATTTGAACACCCCGTCACCTGAGTCAGGTAATTCATTTCTGATTATCCTC  
AGCAAAGT

CTTCGTTCCAGCATTTCTATCTGGCTGTAAATATTCTCATGCGGCCCATTTGAAGGCATTGTAGTTCTAGG  
GACACCCTATGGCTCCCTCCGGGAGAGGCTGCAGGCGCACCTCCGCTATCTATGGTAATATGCTGAGCTG  
TAGTTGCA

TGAGCCTGTTAAAGATTTTAGATCACTTAAGTTTCGGAGCGGTAGTGATTTCAAATGCTGGGGTGACGAGA  
AGACAAGTTCTCATGTTTCATTTCATCCAGTGTGAACCTAGTTAATTCCTTTACTTCTACCACCTCTTCTTCA  
AAGTGAA

TGGTTACTGCACATCTGAAGCAAACGTACCCTCAACTGTACTACAATAGCAACGTCAATGCTCACAACAAC  
AACAACAACAGCAACAACAACAACAACAACAACAACAGCAACAACAACAACAATCTTTACAACCAGAC  
GCAGTTCT

TGGAGTAATCTTTTGGCCAAAGATAGAGGTAGTTGGTCTGTTACCTGAGAAGACCTTGTGTGGGACCAAAC  
CACCAGTGGCACCTTCAGCCTTAACCTTGTCTTTCATCCTTACCAACCATTAAAGCTTCAGCTTGGACAAAG  
AAGTTTGA

CTCCATGTTGCTCACTCTTTTTCTAAAGAACTTGCACCGGAAAGGTTTGCCAGTGCTCCTCTGGCCGGGCT  
GCAAGTCTTCTGTGAGGGTGATGTACCAACTGGCAGTGGATTGTCTTCTTCGGCCGCATTCAATTTGTGCCG  
TTGCTTTA

GATAAAGGAACTAAAAGAACCCTTTGTTGGAGCAACCAAAGGTGGGAAGGAAAGAACAATTCTGGCATTGTC  
TTCTGGTCTGTTCCAGAAAGAGTGCTCAAAAACGGAGTAGATGATACGGCCAATACCGAAAGATGGTTCAA  
TGACACTA

TACTCATACCGTAAAGACAACCTAATTGTTGTAATACTTTGGCATGATGTTGATTTTGGCCAAGACATGC  
TCGTAGGCTTCTTCGCACCTTGCCACTCTCCATACTCTCCAAAACACTACCCAACCTGAAACCATATGTC  
CCACTCCT

GTAAGCGTCATCGGTGTAAGTCATGACTTGTGATACACACTCAAGACATCAGATGGAATTTGGAATCCAC  
TGTTGCCAGTTTCTAGACCCAAGTAGTCAGAAAGATGAGAGTTGATGTCACCGATAATAGCTTGCAATTCA  
GCAGTTTC

CTCACTCTTTTTCTAAAGAACTTGCACCGGAAAGGTTTGCCAGTGCTCCTCTGGCCGGGCTGCAAGTCTTC  
TGTGAGGGTGATGTACCAACTGGCAGTGGATTGTCTTCTTCGGCCGCATTCAATTTGTGCCGTTGCTTTAGC  
TGTTGTTA

GAACGAGGACATGGATAAATACTTGTGGAGTACCGCAGTTTGAAGCTCCTTCATCAGTCCAGTAATTCCT  
TCCAGTCTCACAATGCGCCCTCCACCAGTCGAACTACCACCCCATTACAATCACATGAAATACAACAAC  
ACTGGTAG

CTCTTTAGAATGCTGTCTTACTTCGTCTTCTACAGGGCTTGCTTCTGCAGGAACAGTAGCAGTAGAAAGTT  
CTATGGTCTCAGCAGTGCTTTGGTCATTTGCTTTTTGTTGTTGAACTTTCTGATGATACAGTTGGTTGGACA  
CTAGATGA

GCAGCATCCTCGACTTCAGTTTACGCAGGAAGTTATTGGATCCCAGGACATCCATTGTGGGTACTACTGTA  
CCTTCTCCGTATCCACCTAGAACCACATCCACAGTGGCGTCCACATCCGTCCAATAGTCGATGGCATCTTC  
GTATTTGA

AAACAAGAACCAAATTTTGGTTTTCTGGTGAAATTCATCTACCTTGAATGAAGAGAGTAAAGACAAGGTCA  
AGGTCAAGGAGAGCAGCTCTGGTAAGTTCAAGAGAGTCATCACTTTGCCAGACTACCCAGGTGTGGATGCA  
GACAACAT

GATAACTGGTTCAACTCTATCAATAGATTGGTCTCTTTATTACCAAAGGTGACGGTCATGCAAGAGAAAT  
AGTTTTGTCATGGCTTCATTAACCTAGAAGATGGCAAACCTGGTGGAGCATTGCTGAACAGTGATAGCAAGA  
CAAAGGAA

CTTCCAATTTACCGGAATTTGATAGAGATTCCACTAAGGTTAATTCTCAACAAGAGACAACACCTGGGACA  
TCAGCTGTTCCAGAGAACCATCATCATGTCTCTCCTCAACCTGCTTCAGTACCACCTCCACAGAATGGACA  
GTACCAAC

TGAAATAGTGCTCCAGTAAAGAGCATGTCAAAGATGTTGAAGTTGCTGTTAAGTTGCTCCTGAATGCAATCC  
ATGAATAATTGTAGACCAACCCTCCCAGCTTTTCGAGGCCTGTTTGATTGAAGTCGTGTGTTGGTAGCTTC  
ATCTACTT

ATTGACAAGACTCATAAGCTGGGTATGAAATTCATCACCGATTTGGTTATCAACCACTGTTCTACAGAACA  
CGAATGGTTCAAAGAGAGCAGATCCTCGAAGACCAATCCGAAGCGTGACTGGTTCTTCTGGAGACCTCCTA  
AAGTTAT

GGACGACAAGTGTGGTGTGACTCCATCCCGTTGATCCTGAAAAGGTTGTTGCGATTGTGGAGTCCACCA  
TGAGGGACCAGGTCCACCAAATACGCCCTCTGACGACATGTCCAGGGCTATTGCAGGTCAATTTGGTCGAG  
TTTTTCAG

ACCTTGAATGAAGAGAGTAAAGACAAGGTCAAGGTCAAGGAGAGCAGCTCTGGTAAGTTCAAGAGAGTCAT  
CACTTTGCCAGACTACCCAGGTGTGGATGCAGACAACATTAAAGCAGACTACGCAAATGGTGTGTTTACAT  
TAACAGTT

TCCTTTAAGGATCTCGAGCTTTCGTAAGAAAGTGGCACAAACTGAATGGAATCACCGGGTTAACCTGTCC  
AACCTTCCACAGTTCTGCTTCTGGGACAACAGCTTGACACACAAAACCACCTAAGGAAGGACCATCGCAAG  
TAATAATA

ATCAAAGCACCCAAAGTAGCTGGAGTAATCTTTTGGAGCAAGATAGAGGTAGTTGGTCTGTTACCTGAGAA  
GACCTTGTGTGGGACCAAACCACAGTGGCACCTTCAGCCTTAACTTGTTCTTCATCCTTACCAACCATTA  
AAGCTTCA

TAACAACACACAATTGAAGGTCATTGACGGTTTTAACAAGGTTCAAACCTGTTGGTGGTGCCATTGAAGTTA  
CTGGTAACTTCTCAACCTTGGACTTATCTTCTTTGAAGTCTGTTAGAGGTGGTGCTAACTTCGACTCTTCT  
TCCAGTAA

GCTAGTAGAGCCTGGGACAAAGTAGGAACCTCTGGACCAGTCACCGTTAGTGTTAGAAGATGATGACGAAG  
ATGATGAAGCAGCAGCAGCAGAAGAGGTGGTTTTAGAGGAAGAGATGGAAGACTGGCTTTCACTCGTTTCA  
ACTGCTTG

GAGTTATGGTCATCATCAAAATCTAGTACTGTGCTATCCTCCTCAATCTGTGAATAGCGTCCCCAGAGAT  
TCTGGGCTCTTGGTCTACCGACAATCTTCCCGAAGTGCACGGTTGGTGTGCGAAGTCGAGGATCTCGGAG  
TCGTAGTA

CACACACACCACACCACACCACACCACACCACACCACACCACACCACACCACACCACACCACACCACACC  
ACACCACACCACACCACACCACACCACACCACACCACACCACACCACACCACACCACACCACACCACACC  
CCACACAC

CCCACACCACACCACACCACACCACACCACACCACACCACACCACACCACACCACACCACACCACACC  
CACACACCACACCACACCACACCACACCACACCACACCACACCACACCACACCACACCACACCACACC  
CACCACAC

CACCACACACCACACCACACCACACCACACCACACCACACCACACCACACCACACCACACCACACC  
CACCACACCACACCACACCACACCACACCACACCACACCACACCACACCACACCACACCACACCACACC  
ACACACAC

CCACACACACCACACCACACCACACCACACCACACCACACCACACCACACCACACCACACCACACC  
ACACACCACACCACACCACACCACACCACACCACACCACACCACACCACACCACACCACACCACACC  
CACCACAC

CACACCACACCACACCACACCACACCACACCACACCACACCACACCACACCACACCACACCACACC  
CCCACACACACCACACCACACCACACCACACCACACCACACCACACCACACCACACCACACCACACC  
CACCACAC

CACACCACACCACACCACACCACACCACACCACACCACACCACACCACACCACACCACACCACACC  
CACCACACCACACCACACCACACCACACCACACCACACCACACCACACCACACCACACCACACCACACC  
ACACCACA

CCACACCACACCACACCACACCACACCACACCACACCACACCACACCACACCACACCACACCACACC  
CACCACACCACACCACACCACACCACACCACACCACACCACACCACACCACACCACACCACACCACACC  
CACACCCA

ACCCACACACCACACCACACCACACCACACCACACCACACCACACCACACCACACCACACCACACC  
ACCCACACACCACACCACACCACACCACACCACACCACACCACACCACACCACACCACACCACACC  
ACACCAC



CCACACCACACCCACACCCACACACCACACCCACACCCACACCCCACACCCACACACCACACCCACACACA  
CCACACCCACACACACCCACACCCACACCCACACACCACACCCACACACCACACCCACACACCACACCC  
ACACCACA

ACCCACACCCACACACCACACCCACACACACCACACCCACACACACCCACACCCACACCCACACACCACAC  
CCACACACCCACACCCACACACACCACACCCACACCCACACCCACACCCACACACCACACCCCTAACACTAC  
CCTAACAC

CACACACCACACCCACACACACCACACCCACACACACCACACCCACACACCACACCCACACACCACACCC  
ACACCCACACACACCACACCCACACCCACACCCACACCCACACACCACACCCCTAACACTACCCTAACACTA  
CCCTATTTC

ACCCACACACACCACACCCACACACACCACACCCACACACCACACCCACACACCACACCCACACACCACAC  
ACACCACACCCACACCCACACCCACACCCACACACCACACCCCTAACACTACCCTAACACTACCCTATTCTA  
ACCCTGAT

ACCACACCCACACACACCCACACCCACACACCACACCCACACACCACACCCACACACCACACACCACACC  
CACACCACACCCACACCCACACACCACACCCCTAACACTACCCTAACACTACCCTATTCTAACCCCTGATTT  
TACCTGTC

TGAGGGTAGGTTTGGAGACAGGTAATAATCAGGGTTAGAATAGGGTAGTGTTAGGGTAGTGTTGGGTGTGG  
GTGTGTGGGTGTGGTGTGTGGGTGTGGTGTGTGGGTGTGGTGTGTGGGTGTGGGTGTGTGGGTGTGGT  
GGTGTGGT

TGAAGCTCGATACCGTTCGAGGTCTTTTCCACTTTCTCTGCCTTCTTGATCACAGGCTTCTCCACTTTCTT  
TGCAGGAGTTGCCACTGGCTGGTGTCTGGTGTCTTCTGCTGCTGCTTCTGCTGCTGCTTCTGCTTCTGCT  
TCTTGTGG

CACACACCCACACCCACACCCACACACCACACCCACACACCACACCCACACACCACACCCACACACCACAC  
CCACACCCACACACCCACACCCCTAACACTACCCTAACACTACCCTATTCTAACCCCTGATTTTACCTGTCTC  
CCTAACCTTA

TTCAAGCGCTGGCGCAGTTGTTTCTTCAAGTTGACGTTCTCCTCGTCCATGGTTCACACCGTCCAAATTCAC  
CTGCTCCTCCCCCTGCGGTGGGGCCCCACTGCTCAACACAAGGTAGTACTTCTTATTCTTTTTAGACTCTG  
GGTCTGTC

TGCTTCCGGCCTGGCTGCCTTGGCTTCTCAATTCTTTAAGTCAGGTAACAATTCCCAAGGTCAAGGACAAG  
GTCAAGGTCAAGGTCAAGGTCAAGGACAAGGTCAAGGTCAAGGTCTTTTACTGCTTTGGCGTCTTTGGCT  
TCATCTTT

TACGAACCTGAGTCTACCGTTTCTCCTTTTACGATTTCTTGCAATTGTTTGATGAAACCAAGGTCCAGTA  
CGGACTGGCACGTGTGTCCCACCAGGGTCAGACGTTGAGAAGATTATTATCATTGGTTGGTGTCTGATT  
CTGCGCCA

TAGTACACAAGGGAACCTCGAACTATGTTTCTGAATCAACTGCAAGTGGAAGTTCACAATACCAGGACTGGT  
CAAGCTCTTCTTCCGCTGTCAAAACCACTTGGGTTGTATCAACACAACCTAATACACAAGGGTCTGTA  
ACGTCAAC

CTGGCTGCCTTGGCTTCTCAATTCTTTAAGTCAGGTAACAATTCCCAAGGTCAAGGACAAGGTCAAGGTCA  
AGGTCAAGGTCAAGGACAAGGTCAAGGTCAAGGTCTTTTACTGCTTTGGCGTCTTTGGCTTCATCTTTCA  
TGAATTCC

CCAATTCCAGCACTCTTGTGCTCGAACAACGTTTCTGAATCAACTGCAAGCGGAAGTTCACAATACCAG  
GACTGGTCAAGCTCTTCTTCCGCTGTCAAAACCACTTGGGTTGTATCAACACAACCTAATACACAAGG  
GTCTGTAA

ACTCCTTGTCTTTGCCTCCCTTCAAGCGCTGGCGCAGTTGTTTTCTTCAAGTTGACGTTCTCCTCGTCCATG  
GTCACACCGTCCAAATTCACCTGCTCCTCCCCCTGCGGTGGGGCCCCACTGCTCAACACAAGGTAGTACTT  
CTTATTCT

TTTGCCTCCCTTCAAGCGCTGGCGCAGTTGTTTTCTTCAAGTTGACGTTCTCCTCGTCCATGGTCACACCGT  
CCAAATTCACCTGCTCCTCCCCCTGCGGTGGGGCCCCACTGCTCAACACAAGGTAGTACTTCTTATTCTTT  
TTAGACTC

CACTCTTGCTGCCTCGAACAACGTTCTGAATCAACTGCAAGCGGAAGTTCACAATACCAGGACTGGTCAA  
GCTCTTCTCTTCCGCTGTCACAAACCACTTGGGTTGTTCATCAACACAATAACACAAGGGTCTGTAACG  
TCAACCAC

CTCTTGGCAGACTCCTTGTCTTTGCCTCCCTTCAAGCGCTGGCGCAGTTGTTTTCTTCAAGTTGACGTTCTC  
CTCGTCCATGGTCACACCGTCCAAATTCACCTGCTCCTCCCCCTGCGGTGGGGCCCCACTGCTCAACACAA  
GGTAGTAC

TGGCTTCTCAATTCTTTAAGTCAGGTAACAATTCCCAAGGTCAGGGACAAGGTCAAGGTCAAGGTCAAGGT  
CAAGGACAAGGTCAAGGTCAAGGTTCTTTTACTGCTTTGGCGTCTTTGGCTTCATCTTTTATGAATTCCAA  
CAACAATA

TTAGAAGTAGGAGATCCGTTGATGGCTGTGTTACTCAATGGTGCCACGGAAACCTGGGGAGGTGGTTGCTG  
TTGTTGAAGTTGCTGCTGTTGCAGTTGCTGTTGTGGTAGTTGTTGTTGGGCGTTTGAGGACACCACAGGCA  
AAGTGGTG

GCTCAACAACAACAGCAGCAATTACAGAAAAGCCGTTTGAATCAGCCATCCCAGTCGGCTCAACCTCCAGG  
AGTGAATGTCCCAAATCCTCAAGGTGGGATTGCTGCAGTTCAATCAGATTTGGAACAGAATCAACGTGTTCC  
TCGTTTAC

GTTTTCGAATTCGAAAAGTTTCGCTGCTGGTACTAAGGCTTTGTTAGACGAAGTTGTCAAGAGCTCTGCTGC  
TGGTAACACCGTCATCATTGGTGGTGGTGACACTGCCACTGTGCTAAGAAGTACGGTGTCACTGACAAGA  
TCTCCCAT

ACTATGGTGACTTACCACCTATGTTGACTGGTATTCCAGCTGAACAAGTCACCAGAGTCATCACTGGTGTC  
CCATGGTACTCCACTAGATTGAGACCAGCCATCTCCAGTGTCTATCTAAGGACGGTATCTACACTGCTAT  
TCCAAAAT

AACCTGGGGAGGTGGTTGCTGTTGTTGAAGTTGCTGCTGTTGCAGTTGCTGTTGTGGTAGTTGTTGTTGGG  
CGTTTTGAGGACACCACAGGCAAAGTGGTGGTAGGCAACTGTGAGCCAACCAGATTAGGACGGCTAGCTTGT  
ACTGGGAA

AGTTGTCAAGAGCTCTGCTGCTGGTAAACACCGTCATCATTGGTGGTGGTGACACTGCCACTGTGCTAAGA  
AGTACGGTGTCACTGACAAGATCTCCCATGTCTCTACTGGTGGTGGTCTTCTTTGGAATTATTGGAAGGT  
AAGGAATT

GAGATCCGTTGATGGCTGTGTTACTCAATGGTGCCACGGAAACCTGGGGAGGTGGTTGCTGTTGTTGAAGT  
TGCTGCTGTTGCAGTTGCTGTTGTGGTAGTTGTTGTTGGGCGTTTGAGGACACCACAGGCAAAGTGGTGGT  
AGGCAACT

AACAGCAGCAATTACAGAAAAGCCGTTTGAATCAGCCATCCCAGTCGGCTCAACCTCCAGGAGTGAATGTC  
CCAAATCCTCAAGGTGGGATTGCTGCAGTTCAATCAGATTTGGAACAGAATCAACGTGTTCTCGTTCACCT  
CATGGACA

ACTTTCTCTGCCTTCTTGATCACAGGCTTCTCCACTTTCTTTGCAGGAGTTGCCACTGGCTGGTGCTGGTG  
CTGCTTCTGCTGCTGCTTCTGCTGCTGCTTCTGCTTCTGCTTCTGTTGCCCTTGTACAACGCTTTCTGGT  
ACTTCTCG

TCGACCAACTTCAAGAAGGCAGAGATACGTGTGGGTTTTGCAGACAACTCCACAATACAGCTTGTTTTCGCT  
GATGTCGACGACACGACCTCCAAAGTTGTTGGTCAAGTTGGTGATATCGTTCAAATGCTCGTGCTTCAACC  
TTAATACC

TAGGGTAATGTGAGGGTAGGTTTTGGAGACAGGTAAAATCAGGGTTAGAATAGGGTAGTGTTAGGGTAGTGT  
GTGGGTGTGGGTGTGTGGGTGTGGTGTGTGGGTGTGGTGTGTGGGTGTGGTGTGTGGGTGTGGGTGTGT  
GGGTGTGG

ACGGTGAAGATGGTGAGCTAATCGAGTACATGAGGATTAAGTCCGGCGTGGCCGATGTTACCGGAGTGGAC  
GGCGTGCAGGGTGAGGGTGTGATCGACAGCAAATTGCTGGAAGAGTTCAAGGACAACGTGAGATACACCTT  
GGAAAATG

AGTGGTCTCTTTAGAAGTAGGAGATCCGTTGATGGCTGTGTTACTCAATGGTGCCACGGAAACCTGGGGAG  
GTGGTTGCTGTTGTTGAAGTTGCTGCTGTTGCAGTTGCTGTTGTGGTAGTTGTTGTTGGGCGTTTGAGGAC  
ACCACAGG

GATGGCTGTGTTACTCAATGGTGCCACGGAAACCTGGGGAGGTGGTTGCTGTTGTTGAAGTTGCTGCTGTT  
GCAGTTGCTGTTGTGGTAGTTGTTGTTGGGCGTTTGAGGACACCACAGGCAAAGTGGTGGTAGGCAACTGT  
GAGCCAAC

CCTCCATTCTGTCTTCTCTGTTATCGTAACCAAATTCTTGCTGTTGATGGTGATCCGATGCCTCCTGGTCC  
ATCGACTGTTGATTACCGCTGTGCCGACTGGTGATCCGGAACTTCTCATGGGTGTGGGGGATTTAGGATC  
ATCCATGG

ACAAATAAGAGCTCAACAACAACAGCAGCAATTACAGAAAAGCCGTTTGAATCAGCCATCCCAGTCGGCTC  
AACCTCCAGGAGTGAATGTCCCAAATCCTCAAGGTGGGATTGCTGCAGTTCAATCAGATTTGGAACAGAAT  
CAACGTGT

CCTTCTTGATCACAGGCTTCTCCACTTTCTTTGCAGGAGTTGCCACTGGCTGGTGCTGGTGCTGCTTCTGC  
TGCTGCTTCTGCTGCTGCTTCTGCTTCTGCTTCTTGTGGCCTTGTACAACGCTTTCTGGTACTTCTCGTC  
CTCGCTGA

TTACTCAATGGTGCCACGGAAACCTGGGGAGGTGGTTGCTGTTGTTGAAGTTGCTGCTGTTGCAGTTGCTG  
TTGTGGTAGTTGTTGTTGGGCGTTTGAGGACACCACAGGCAAAGTGGTGGTAGGCAACTGTGAGCCAACCA  
GATTAGGA

GAAGAGAATGATGATGACTGGGATGATGATGAAGACGAGGCTGCTCAACCTCCTTTGCCTTCGAGGAATGT  
TGCGTCAGGAGCACCAGTGCAAAAAGAAGAGCCTGAACAAGAAGAGATCGCCCCAAGCTTACCTTCTAGAA  
ACTCGATC

AAACTCGATCCCAGCTCCAAAACAAGAAGAAGCACCTGAACAAGCACCTGAAGAAGAAATTGAAGAAGAAG  
CTGAGGAAGCCGCTCCACAGCTGCCATCAAGAAGCTCTGCAGCTCCTCCTCCGCTCCAAGACGAGCAACT  
CCAGAGAA

TTCATGAGCTCCTTCTTTCTTAGAATGAAACTCTTGGCAGACTCCTTGTCTTTGCCTCCCTTCAAGCGCTG  
GCGCAGTTGTTTCTTCAAGTTGACGTTCTCCTCGTCCATGGTCACACCGTCCAATTCACCTGCTCCTCCC  
CCTGCGGT

TAATTCTCAACAAGAGACAACACCTGGGACATCAGCTGTTCCAGAGAACCATCATCATGTCTCTCCTCAAC  
CTGCTTACGTACCACCTCCACAGAATGGACAGTACCAACAGCACGGCATGATGACCCCAAACAAAGCTATG  
GCCTCTAA

CCGGACCCACACTATCCGTTGCCACAGTATATCCCACCACTGAGTACTTCTCACCTGATCCAATCGATTCC  
ACAGAATCAACACTCTGAAGTACCTCAAGCTGAGACAAAGGTGAGAAATAACGTCTTACCACCACACACTT  
TAACATCA



GTGCCACGGAAACCTGGGGAGGTGGTTGCTGTTGTTGAAGTTGCTGCTGTTGCAGTTGCTGTTGTGGTAGT  
TGTTGTTGGGCGTTTGGAGACACCACAGGCAAAGTGGTGGTAGGCAACTGTGAGCCAACCAGATTAGGACG  
GCTAGCTT

GGCGCAGTTGTTTCTTCAAGTTGACGTTCTCCTCGTCCATGGTCACACCGTCCAAATTCACCTGCTCCTCC  
CCCTGCGGTGGGGCCCCACTGCTCAACACAAGGTAGTACTTCTTATTCTTTTTAGACTCTGGGTGCTCCAC  
CACAAAGCC

TGTTAGACGAAGTTGTCAAGAGCTCTGCTGCTGGTAACACCGTCATCATTGGTGGTGGTGACACTGCCACT  
GTCGCTAAGAAGTACGGTGTCACTGACAAGATCTCCCATGTCTCTACTGGTGGTGGTCTTCTTTGGAATT  
ATTGGAAG

TACCGTTCGAGGTCTTTTCCACTTTCTCTGCCTTCTTGATCACAGGCTTCTCCACTTTCTTTGCAGGAGTT  
GCCACTGGCTGGTGTGGTGTCTTCTGCTGCTGCTTCTGCTGCTGCTTCTGCTTCTGCTTCTTGTGGC  
CTTGTACA

TCAGGAACAAATTCTCTCATTAGTAGAACTGTGTTTGAATGTTTGGCGCTGCTTCAGCACCCAAGTCTTGTC  
GTGCGAACACAGTACAACCTCAGACTTGTCTTTGTCCAATGACTTAAACCTTAACTGGTGATTTTGAACCG  
GATCCTGT

CGCTGCTGGTACTAAGGCTTTGTTAGACGAAGTTGTCAAGAGCTCTGCTGCTGGTAACACCGTCATCATTG  
GTGGTGGTGACACTGCCACTGTGCTAAGAAGTACGGTGTCACTGACAAGATCTCCCATGTCTCTACTGGT  
GGTGGTGC

TACCTTCTAGAAACTCGATCCCAGCTCCAAAACAAGAAGAAGCACCTGAACAAGCACCTGAAGAAGAAATT  
GAAGAAGAAGCTGAGGAAGCCGCTCCACAGCTGCCATCAAGAAGCTCTGCAGCTCCTCCTCCGCTCCAAG  
ACGAGCAA

ATGGCTCCCCTTTCAGGTTCAAGCCCAAGTTATAGGTCAACACCAAGCCAGCTGTGGTCACTGACACTGGG  
ATAGTGGCTGCCCTTCCAAAGACCTGACAGGGCCGGCAGGTAGAATCTTTCACCCAAAATTTGAGTTC  
ATTGGGTG

ATTCTTTAAGTCAGGTAACAATTCCCAAGGTGAGGACAAGGTCAAGGTCAAGGTCAAGGTCAAGGACAAG  
GTCAAGGTCAAGGTTCTTTTACTGCTTTGGCGTCTTTGGCTTCATCTTTCATGAATTCCAACAACAATAAT  
CAGCAAGG

ATAGAGTCGACCTCCATTCTGTCTTCTCTGTTATCGTAACCAAATTTCTGCTGTTGATGGTGATCCGATGC  
CTCCTGGTCCATCGACTGTTGATTACCGCTGTGCCGACTGGTGATCCGAAACTTCTCATGGGTGTGGGGG  
ATTTAGGA

CCTTCTTTCTTAGAATGAAACTCTTGGCAGACTCCTTGTCTTTGCCTCCCTTCAAGCGCTGGCGCAGTTGT  
TTCTTCAAGTTGACGTTCTCCTCGTCCATGGTCACACCGTCCAAATTCACCTGCTCCTCCCCCTGCGGTGG  
GGCCCCAC

CTCCGTTATCCCAGGTTCTTGGGTTTGGTGGCCATCTGCGTCTTGGCCTCTTTGCCAGACAAGAACACCG  
CATTTGGTTTGTACGAACCATGCCACGGTTCTGCTCCAGATTTGCCAAAGAATAAGGTCAACCCTATCGCC  
ACTATCTT

GCAAAGTTGTTTCGATCGTACTGTTACTCTCTCTTTTCAAACAGAATTGTCCGAATCGTGTGACAACAAC  
AGCCTGTTCTCACACTCTTTTCTTCTAACCAAGGGGTGGTTTAGTTAGTAGAACCTCGTGAAACTTA  
CATTTACA

TTGGAAGACCGAAGAAAATAGATAGACTTTTGAATAAGTTTCAACAACAACATGTGGTTGAAATCCTTGCTG  
CTCTGCCTGTACTCCTTAGTACTCTGCCAAGTCCACGCTGCACCTTCATCAGGGAAGCAGATTACCTCCAA  
GGATGTTG

TTCGTCGAGAACGGTGAAGATGGTGAGCTAATCGAGTACATGAGGATTAAGTCCGGCGTGGCCGATGTTCA  
CGGAGTGGACGGCGTGCAGGGTGAGGGTGTTCATCGACAGCAAATTGCTGGAAGAGTTCAAGGACAACGTGA  
GATACACC

GGAAGAACCAGAAGAGAATGATGATGACTGGGATGATGATGAAGACGAGGCTGCTCAACCTCCTTTGCCTT  
CGAGGAATGTTGCGTCAGGAGCACCAGTGCAAAAAGAAGAGCCTGAACAAGAAGAGATCGCCCCAAGCTTA  
CCTTCTAG

ACGAATCTGCAAACGTCTTTGCTCTTCAGGCGACAAATCTCTCTTCGATCTGCGTCCACTTTGCAGAGGCA  
TTTTAGTTGCGCCAACCACAGGGCCTGGAGAAGGAGTGTGGACATACCGATGGGTGAAGGCGAAGCTTGA  
ACTGGAAC

GGCAAGTTTTAGCAACTGTTTTCCAGCCTTCACCTTCAAACACATGTCCCAAGTGTCCACCACACCTTGCACA  
ACATATCTCCACCCTCGCAGGCATTAAAGAATTGTACGATGATATGTGATGGCTCCAGGGGATACCTCTT  
CGTAGAAT

AAAGTGTGCGTTGTAGTTTCAGATGAGATAGCGACTCAATTTCCACGCCTGGGGCAAAGATGTTTACACAGGG  
CCCCAATTGCTGAACTTGGCAATCGTGTCAATGTGGTCATCAAAGGCCCTACGGTGATAACGTTTTTCTG  
CAGACGCA

AGCTCTGCTGCTGGTAACACCGTCATCATTGGTGGTGGTGACACTGCCACTGTGCGTAAGAAGTACGGTGT  
CACTGACAAGATCTCCCATGTCTCTACTGGTGGTGGTCTTCTTTGGAATTATTGGAAGGTAAGGAATTGC  
CAGGTGTT

CCGATGAAGCCTCCGTTATCCCAGGTTCTTTGGGTTTTGTTGCCATCTGCGTCCTTGGCCTCTTTGCCAGAC  
AAGAACACCGCATTTGGTTTTGTACGAACCATGCCACGGTTCTGCTCCAGATTTGCCAAAGAATAAGGTCAA  
CCCTATCG

GAAGAAAATAGATAGACTTTTGAATAAGTTTCAGCAACAACATGTGGTTGAAATCCTTGCTGCTCTGCCTGT  
ACTCCTTAGTACTCTGCCAAGTCCACGCTGCACCTTCATCAGGGAAGCAGATTACCTCCAAGGATGTTGAT  
CTTCAGAA

GTAATGTTAACCACCATTGCTATTTCTTTGCTAGGTTTTGCCAAAGCCGTTGGCGAAGGCAGCACTAGACG  
GCGAGTCACTTCCGTCTCTTTGTCCACTTCTCTTACCATCAAATCGAAGCCTGCAAGTGCCGTCCCTCT  
TGGTTCCG

GGGAACCTCGAACTATGTTTCTGAATCAACTGCAAGTGGAAAGTTACAATACCAGGACTGGTCAAGCTCTTC  
TCTTCCGCTGTCAAAACCACTTGGGTTGTTCATCAACACAATAACACAAGGGTCTGTAACGTCAACCA  
CATCCCCG

CAGATTAATGAAAAGTATGGCCACTTCTTAGAAAAATCGAAGGTTGTTATTGATCTGTGTGCTGCTCCTGG  
TTCATGGTGTCAAGTTGCATCCAAACTCTGTCTGTCAACTCCTTAATTATTGGTGTGATATTGTTCCAA  
TGAAGCCG

CCCACGTCTTTTTCATGAGCTCCTTCTTTCTTAGAATGAAACTCTTGGCAGACTCCTTGTCTTTGCCTCCCT  
TCAAGCGCTGGCGCAGTTGTTTTCTTCAAGTTGACGTTCTCCTCGTCCATGGTCACACCGTCCAAATTCACC  
TGCTCCTC

GCCTTGACAGAGGGTAAAGTAGTGGTCTCTTTAGAAGTAGGAGATCCGTTGATGGCTGTGTTACTCAATGG  
TGCCACGGAAACCTGGGGAGGTGGTTGCTGTTGTTGAAGTTGCTGCTGTTGCAGTTGCTGTTGTGGTAGTT  
GTTGTTGG

TGCCCCTGTGATCTCCAGAGCAAAGTTTCGTTTCGATCGTACTGTTACTCTCTCTCTTTCAAACAGAATTGT  
CCGAATCGTGTGACAACAACAGCCTGTTCTCACACACTCTTTTCTTCTAACCAAGGGGGTGGTTTTAGTTTA  
GTAGAACC

CATCATCATTGGCATCGTTGCCATCTCTTTCTATATCACCAACTGTTGACACTGTTTCTGTTCTACAACCA  
ACTACTTCCATCGCAACACTAACTTGCACAGACTCACAATGCCAACAGGAGGTATCCACTATCTGTAATGG  
ATCCAAC

TTGGTTCTGAGGCATACCGGCGTTATTACTGTTGTGGAACCTTCTCCTTTGAGGACCATTGCTGTTATGGT  
GATGACTGTGGTGATGATTACGGTGGTGAGGTGGTTGTTGCTGTTGTGTAGATTGACCATTTTCTTGAGAG  
GTAGCGTC

GATAGAGATTCCACTAAGGTTAATTCTCAACAAGAGACAACACCTGGGACATCAGCTGTTCCAGAGAACCA  
TCATCATGTCTCTCCTCAACCTGCTTCAGTACCACCTCCACAGAATGGACAGTACCAACAGCACGGCATGA  
TGACCCCA

ACTAAGGCTTTGTTAGACGAAGTTGTCAAGAGCTCTGCTGCTGGTAAACACCGTCATCATTGGTGGTGGTGA  
CACTGCCACTGTGCTAAGAAGTACGGTGTCACTGACAAGATCTCCCATGTCTCTACTGGTGGTGGTCTT  
CTTTGGAA

AATAGGTTGTTTCAGGAACAAATTCTCTCATTAGTAGAACTGTGTTTGAATGTTTGGCGCTGCTTCAGCACCC  
AAGTCTTGTGCTGCGAACACAGTACAACCTCAGACTTGTCTTTGTCCAATGACTTAAACCTTAACTGGTGA  
TTTTGAAC

GTGGGAAGCCTTGGTTCTGAGGCATACCGGCGTTATTACTGTTGTGGAACCTTCTCCTTTGAGGACCATTG  
CTGTTATGGTGATGACTGTGGTGATGATTACGGTGGTGAGGTGGTTGTTGCTGTTGTGTAGATTGACCATT  
TTCTTGAG

CGTGGCTTGAGGATTTAGTTCTCTTAGCTCGCCAGTAATCTGAGAGGAGAGTGTGGAAACTGGACGTTTCT  
GGGAATAGAGGACAAGGAAGAAGAAGTAGGGGTAGCGCCTGAGCCGTGATTAGGCAAAGAGTCATAGAGT  
TGAGAATC

TAGAATGAAACTCTTGGCAGACTCCTTGTCTTTGCCTCCCTTCAAGCGCTGGCGCAGTTGTTTCTTCAAGT  
TGACGTTCTCCTCGTCCATGGTCACACCGTCCAAATTCACCTGCTCCTCCCCCTGCGGTGGGGCCCCACTG  
CTCAACAC

ACCGAATGGCTCGACCAACTTCAAGAAGGCAGAGATACGTGTGGGTTTTGCAGACAACCTCCACAATACAGC  
TTGTTTTCGCTGATGTGACGACACGACCTCCAAAGTTGTTGGTCAAGTTGGTGATATCGTTCAAATGCTCG  
TGCTTCAA

GGTGGTTGCTGTTGTTGAAGTTGCTGCTGTTGCAGTTGCTGTTGTGGTAGTTGTTGTTGGGCGTTTGGAGGA  
CACCACAGGCAAAGTGGTGGTAGGCAACTGTGAGCCAACCAGATTAGGACGGCTAGCTTGTACTGGGAAGG  
CCGATGGC

CGGATAATGAGGAAGAACCAGAAGAGAATGATGATGACTGGGATGATGATGAAGACGAGGCTGCTCAACCT  
CCTTTGCCTTCGAGGAATGTTGCGTCAAGGACACAGTGCAGGAGGAGCCTGCAAAAAGAAGAGCCTGAACAAGAAGAGATCGC  
CCCAAGCT

CACATTGAAGCGGATAATGAGGAAGAACCAGAAGAGAATGATGATGACTGGGATGATGATGAAGACGAGGC  
TGCTCAACCTCCTTTGCCTTCGAGGAATGTTGCGTCAAGGACACAGTGCAGGAGGAGCCTGCAAAAAGAAGAGCCTGAACAAG  
AAGAGATC

CAGTGGAGTCGACTGAAGGAGTGGAGTCGACTGAGGCGGAACGTGTGGCAGGGAAGCAGGAGCAGGAGGAG  
GAGTACCCTGTGGACGCCACATGCAAAAGTACCTTTACACCTGAAGAGCAAGTCTCGGTGAGGTTCCA  
CCGAAAGG

TTTATGACCAGGGAGGTCAACAGAAAGTTTTCTAGTTCTTACATCCACACTTTCAACGTGGTATCTTTGG  
AACATGACACCAGTAGTCGGCAGTCCGATGACCACGCAACCTGGTATACGCTGGCTACATGCCCTCTAAAT  
GTGGAGAT

GCCCCAAGCTTACCTTCTAGAAACTCGATCCCAGCTCCAAAACAAGAAGAAGCACCTGAACAAGCACCTGA  
AGAAGAAATTGAAGAAGAAGCTGAGGAAGCCGCTCCACAGCTGCCATCAAGAAGCTCTGCAGCTCCTCCTC  
CGCCTCCA

AAAGTATGGGTGCTTCCGGCCTGGCTGCCTTGGCTTCTCAATTCTTTAAGTCAGGTAACAATTCCCAAGGT  
CAGGGACAAGGTCAAGGTCAAGGTCAAGGTCAAGGACAAGGTCAAGGTCAAGGTCTTTTACTGCTTTGGC  
GTCTTTGG

TGTCACCGACGGCATCACCAATAAACTTGCAGACCAAGAGGTTGTTGACCTCATCACCTCTACGGTGAAC  
CCTGGGGACTGAAAAAGGCGACTCCTCAATTTGTTGCAGAGGAGACAATCAAATTTATTTCAGGCAATAGCC  
ACTAAACA

ACCCAGTTGAGATTGCTGAAGCTGTTTTCAACTATGGTGACTTCACCACTATGTTGACTGGTATTCCAGCT  
GAACAAGTCACCAGAGTCATCACTGGTGTCCCATGGTACTCCACTAGATTGAGACCAGCCATCTCCAGTGC  
TCTATCTA

AAAGGAGTTCTTGGCAATGCCATCATAACCGCTTCTTGCACACTCTAGGACACCGAATGGCTCGACCAACTT  
CAAGAAGGCAGAGATACGTGTGGGTTTTGCAGACAACCTCCACAATACAGCTTGTTCGCTGATGTGACGAC  
CACGACCT

CGTGCCACACTGGTAGAGTCTGTGTCTACGATGTGGTCAACGACAAGGGCTGGAGTGAAACATGTTCAAC  
CACAGAATCCACAAAGTCATTGACGAAGTTCTCCTTGGATACGAGCAGGCTGCCAAGTGC GTTGAACCAGA  
GCCCTGCG

TGGTGGAGTCAGATGGAAC TGGGGTAAACATCTTCGATACGGCCAATTCTCAAACCAGATCTGGCCAAAGCT  
CTCAAAGCAGCTTGACCACCTGGACCTGGAGTCTTGGTTCTAGTACCACCGGTAGCTCTGATCTTAACGTG  
AACGGCAG

GGTCTTTTCCACTTTCTCTGCCTTCTTGATCACAGGCTTCTCCACTTTCTTTGCAGGAGTTGCCACTGGCT  
GGTGTGGTGTCTGCTTCTGCTGTCTGCTTCTGCTGTCTGCTTCTGCTTCTGCTTCTTGTGGCCTTGTACAAC  
GCTTTCTG

AAACGTCTTTGCTCTTCAGGCGACAAATCTCTCTTCGATCTGCGTCCACTTTGCAGAGGCATTTTAGTTGC  
GCCAACACAGGGCCTGGAGAAGGAGTGTGGACATACCGATGGGTGAAGGCGAAGCTTGAAC TGGAACTT  
GTACAGGA

ACCACCATTGCTATTTCTTGGCTAGGTTTGCCAAAGCCGTTGGCGAAGGCAGCACTAGACGGCGAGTCACT  
TCCGTCTCTTTGTCCACTTCTCTTACCATCAAATCGAAGCCTGCAAGTGCCGTCCCTCTTGGTTCCGAT  
GACAATTG

AGAAGAGATCGCCCCAAGCTTACCTTCTAGAAACTCGATCCCAGCTCCAAAACAAGAAGAAGCACCTGAAC  
AAGCACCTGAAGAAGAAATTGAAGAAGAAGCTGAGGAAGCCGCTCCACAGCTGCCATCAAGAAGCTCTGCA  
GTCCTCC

TGATATCTTCGATGAAGAAACAAGTTCATTAATATCAACCTCAGCTGCCTCATCGGAGAAAGCCTCGTCCA  
CCCTTTCTTCAACTGCACAACCTCATAGGACATCTCACTCTTCTCTTATTTCGAGCTACCAGTCACTGT  
CCATCATC

GCTTGTCTTCAAAGGAGTTCTTGGCAATGCCATCATAACCGCTTCTTGCACACTCTAGGACACCGAATGGCT  
CGACCAACTTCAAAGAAGGCAGAGATACGTGTGGGTTTTGCAGACAACCTCCACAATACAGCTTGTTCGCTG  
ATGTGAC

GCAAATGCCTACCCAAATCCTAACCTCCGAACAAATAAGAGCTCAACAACAACAGCAGCAATTACAGAAAA  
GCCGTTTGAATCAGCCATCCCAGTCCGCTCAACCTCCAGGAGTGAATGTCCCAAATCCTCAAGGTGGGATT  
GCTGCAGT

GCTAGGTTTTGCCAAAGCCGTTGGCGAAGGCAGCACTAGACGGCGAGTCACTTCCGTCTCTTTGTCCACTTC  
CTCTTCACCATCAAATCGAAGCCTGCAAGTGCCGTCCCTCTTGGTTCCGATGACAATTGCAGGATAAAAAG  
TGGTCGTT

GATCTCCAGAGCAAAGTTCGTTTCGATCGTACTGTTACTCTCTCTCTTTCAAACAGAATTGTCCGAATCGTG  
TGACAACAACAGCCTGTTCTCACACTCTTTTTCTTAACCAAGGGGTGGTTTAGTTTAGTAGAACCTC  
GTGAACT

GAAAAAGAATACGAACCTGAGTCTACCGTTCCCTCTTTACGATTTCTTGCAATTGTTTGTGAAACCA  
AGGTCCAGTACGGACTGGCACGTGTGTCCCACCAGGGTCAGACGTTGAGAAGATTATTATCATTGGTTGG  
TGTCCTGA

ATGATGACTGGGATGATGATGAAGACGAGGCTGCTCAACCTCCTTTGCCTTCGAGGAATGTTGCGTCAGGA  
GCACCAGTGCAAAAAGAAGAGCCTGAACAAGAAGAGATCGCCCCAAGCTTACCTTCTAGAACTCGATCCC  
AGCTCCAA

ATGTGGTCAACGACAAGGGCTGGAGTGTAACATGTTCAACCACAGAATCCACAAAGTCATTGACGAAGTT  
CTCCTTGGATACGAGCAGGCTGCCAAGTGCCTTGAACCAGAGCCCTGCGTAGATTGCTACAACCTGGAAGTT  
TATTCCAA

AAGGAATTGAAGTACTTCGGTAAGGCTTTGGAGAACCCAACCAGACCATTCTTGGCCATCTTAGGTGGTGC  
CAAGGTTGCTGACAAGATTCAATTGATTGACAACCTGTTGGACAAGGTCGACTCTATCATCATTGGTGGTG  
GTATGGCT

TCCTCTTCATCCTCTTCTTGTCCACTATGGAATACAAAGACGTCAACGAGAGTGTCAATTGTACGTTTGAAG  
TGTGGCATGAATGGCTGGCGCAAGTTCCCCAACTGGAGAGGGCAATAAATGATGCGTAGAATTTACGATAG  
GGAATTTA

ATACGACTCGTTTCGTCGAGAACGGTGAAGATGGTGAGCTAATCGAGTACATGAGGATTAAGTCCGGCGTGG  
CCGATGTTACGGAGTGGACGGCGTGCAGGGTGAGGGTGTCAATCGACAGCAAATTGCTGGAAGAGTTCAAG  
GACAACGT

CGTATAGCAAAGATCTGAAATGGATACGGATAAGTTAATCTCAGAGGCTGAGTCTCATTTTTCTCAAGGAA  
ACCATGCAGAAGCTGTTGCGAAGTTGACATCCGCAGCTCAGTCGAACCCCAATGACGAGCAAATGTCAACT  
ATTGAATC

ACCGGAATTTGATAGAGATTCCACTAAGGTTAATTCTCAACAAGAGACAACACCTGGGACATCAGCTGTTTC  
CAGAGAACCATCATCATGTCTCTCTCAACCTGCTTCAGTACCACCTCCACAGAATGGACAGTACCAACAG  
CACGGCAT

AATACCCAAGTTTTCTGCTACTTCCGAAGCTACTAGTACTAGCACTCAAGTGTCTGCTACTTCTGCGACGGC  
CACTGCTAGCGAGAGTTCAACCACATCCCAGTTTTCTACTGCTTCCGAACTATTAGCACTCTCGGTACTC  
AAAATTT

TACCACGTGCTGGTGGAGCCAGTGGAGTCGACTGAAGGAGTGGAGTCGACTGAGGCGGAACGTGTGGCAG  
GGAAGCAGGAGCAGGAGGAGTACCCTGTGGACGCCACATGCAAAAGTACCTTTCACACCTGAAGAGC  
AAGTCTCG

CACAGTGTCTGGTGTCTTGGGCAAGTTTAGCAACTGTTTCCAGCCTTACCTTCAAACACATGTCCCAAG  
TGTCCACCACACCTTGCACAACATATCTCCACCCTCGCAGGCATTAAGAATTGTCACGATGATATGTGAT  
GGCTCCAG

GGGGTAACATCTTCGATACGGCCAATTCTCAAACCAGATCTGGCCAAAGCTCTCAAAGCAGCTTGACCACC  
TGGACCTGGAGTCTTGGTTCTAGTACCACCGGTAGCTCTGATCTTAACGTGAACGGCAGTGATACCGACTT  
CCTTACAC

CCCTTCTTTCTGGTGGAGTCAGATGGAAC TGGGGTAACATCTTCGATACGGCCAATTCTCAAACCAGATCT  
GGCCAAAGCTCTCAAAGCAGCTTGACCACCTGGACCTGGAGTCTTGGTTCTAGTACCACCGGTAGCTCTGA  
TCTTAACG

CTATTCAAGCTACTACCAATGACCAAAC TTTCAAAACTATTCCAAC TCTTGGTTGACGCCACATCGTCATTA  
CCACCAACATTGAGGT CATCCAGTATGGCACCAACAAGTGGTTCTGATTCAATCTCACACAAC TTTTACGAG  
CCCCCCT

CTATTTCTTGGCTAGGTTTGGCAAAGCCG TTTGGCGAAGGCAGCACTAGACGGCGAGTCACTTCCGTCTCTT  
TGTCCACTTCTCTTACCATCAAATCGAAGCCTGCAAGTGCCGTCCCTCTTGGTTCCGATGACAATTGCA  
GGATAAAA

CTTTGGCATGACGAATCTGCAAACGTCTT TGGCTCTTCAGGCGACAAATCTCTCTTCGATCTGCGTCCACTT  
TGCAGAGGCATTTTAGTTGCGCCAACCACAGGGCCTGGAGAAGGAGTGTGGACATACCGATGGGTGAAGG  
CGAAGCTT

GTTGTTGAAGTTGCTGCTGTTGCAGTTGCTG TTTGTGGTAGTTGTTGTTGGGCGTTTTGAGGACACCACAGGC  
AAAGTGGTGGTAGGCAACTGTGAGCCAACCAG ATTAGGACGGCTAGCTTGTACTGGGAAGGCCGATGGCGA  
ACCAGTAG

GCAACACCTGCATATGCGTTGTACCAAGCA ATGAAAGCAACAACAAC TCCAGGACACCACCAGCTCTTGT  
GACACCAAGTCTATTAGCAAAGTGACCAATAGACAACAGTAGGAAAAGTTAATGCTAGTAAGAAGAACAACA  
AAAAGAAC

GGCATCGTTGCCATCTCTTTCTATATCACCA ACTGTTGACACTGTTTCTGTTCTACAACCAACTACTTCCA  
TCGCAACACTAACTTGCACAGACTCACAATGCCAACAGGAGGTATCCACTATCTGTAATGGATCCAAC TGT  
GACGATGT

GACTGAAGGAGTGGAGTCGACTGAGGCGGAACGTGTGGCAGGGAAGCAGGAGCAGGAGGAGGAGTACCCTG  
TGGACGCCACATGCAAAAAGTACCTTTTCA CACCTGAAGAGCAAGTCTCGGTTCGAGGTTCCACC GAAAGGAT  
GCTAGCAA

ATTACAGAAAAGCCGTTTGAATCAGCCATCC CAGTCGGCTCAACCTCCAGGAGTGAATGTCCCAAATCCTC  
AAGGTGGGATTGCTGCAGTTCAATCAGATTTGGAACAGAATCAACGTGTTCTCGTTCACCTCATGGACATT  
TTAGTTTC

AGTCTACCGGTTCTCTTTTACGATTTCTT TGAATTGTTTGGATGAAACCAAGGTCCAGTACGGACTGGCA  
CGTGTGTCCCCACCAGGGTCAGACGTTGAGAAGATTATTATCATTGGTTGGTGTCTGATTCTGCGCCATT  
GAAGACAA

TGTGTCTACGATGTGGTCAACGACAAGGGCTGGAGTGTA AACATGTTCAACCACAGAATCCACAAAAGTCAT  
TGACGAAGTTCTCCTTGGATACGAGCAGGCTGCCAAGTGCGTTGAACCAGAGCCCTGCGTAGATTGCTACA  
ACTGGAAG

CGTCGAAAGTAATAGGTTGTTT CAGGAACAAATTCTCTCATTAGTAGAACTGTGTTTGAATGTTTGC GCTGC  
TTCAGCACCCAAGTCTTGTGCTGCGAACACAGTACAAC TTCAGACTTGTCTTTGTCCAATGACTTAAACCT  
TAACTGGT

TGGCGAAGGCAGCACTAGACGGCGAGTCACTTCCGTCTCTTTGTCCACTTCCCTCTTACCATCAAATCGAA  
GCCTGCAAGTGCCGTCCCTCTTGGTTCCGATGACAATTGCAGGATAAAAAGTGGTCGTTT CAGGATATCTT  
GCCAGAAC

TACATTTAATCCTTCTTGGAGTTTAAAGACGC ACTGTTTACACAGTGTCTGGTGTCTTGGGCAAGTTT TAG  
CAACTGTTTCCAGCCTTACCTTCAAACACATGTCCCAAGTGTCCACCACACCTTGCACAACATATCTCCA  
CCCTCGCA

CCGCCAATTTTAGTACACAAGGGAACCTCGAACTATGTTTCTGAATCAACTGCAAGTGGAAGTTCACAATAC  
CAGGACTGGTCAAGCTCTTCTCTTCCGCTGTACAAACCCTTGGGTTGTCATCAACACAACATAATACACA  
AGGGTCTG

ACCCAAATCCTAACCTCCGAACAAATAAGAGCTCAACAACAACAGCAGCAATTACAGAAAAGCCGTTTGAA  
TCAGCCATCCCAGTCCGGCTCAACCTCCAGGAGTGAATGTCCCAAATCCTCAAGGTGGGATTGCTGCAGTTC  
AATCAGAT

TTGGCAATGCCATCATACCGCTTCTTGCACACTCTAGGACACCGAATGGCTCGACCAACTTCAAGAAGGCA  
GAGATACGTGTGGGTTTTGCAGACAACCTCCACAATACAGCTTGTTCGCTGATGTCGACGACACGACCTCC  
AAAGTTGT

AGCCGTTTGAATCAGCCATCCCAGTCCGGCTCAACCTCCAGGAGTGAATGTCCCAAATCCTCAAGGTGGGAT  
TGCTGCAGTTCAATCAGATTTGGAACAGAATCAACGTGTTCTCGTTCACCTCATGGACATTTTAGTTTCTC  
AAATTAAT

ATCAAATAAAGGTTCTTCTAACAGAGGGTTTTGACGTAGGGACTGTCATGTCAATGCTAAGTGGTTCTGGCG  
GCGGGAGCCAAAGTATGGGTGCTTCCGGCCTGGCTGCCTTGGCTTCTCAATTCTTTAAGTCAGGTAACAAT  
TCCCAAGG

TTCGTTCCAATGTCAAGTTCGATTTTCGAAAATCATTTAATTGGTGGTGTGCTATCGATGCTACAGGTGTT  
CCACTTCCAGATGAGGCGCTGGAAGCCTCCAAGAAGGCTGATGCCGTTTTGTTAGGTGCTGTGGGTGGTCC  
TAAATGGG

TCCACCAGGTGTTTTCGAATTCGAAAAGTTCGCTGCTGGTACTAAGGCTTTGTTAGACGAAGTTGTCAAGA  
GCTCTGCTGCTGGTAACACCGTCATCATTGGTGGTGGTGACACTGCCACTGTCGCTAAGAAGTACGGTGTG  
ACTGACAA

TCGAAAAGTTCGCTGCTGGTACTAAGGCTTTGTTAGACGAAGTTGTCAAGAGCTCTGCTGCTGGTAACACC  
GTCATCATTGGTGGTGGTGACACTGCCACTGTCGCTAAGAAGTACGGTGTCACTGACAAGATCTCCCATGT  
CTCTACTG

CTTCTTGCACACTCTAGGACACCGAATGGCTCGACCAACTTCAAGAAGGCAGAGATACGTGTGGGTTTTGC  
AGACAACCTCCACAATACAGCTTGTTCGCTGATGTCGACGACACGACCTCCAAAGTTGTTGGTCAAGTTGG  
TGATATCG

ATGATATGTAGTAAATGTTAACCACCATTGCTATTTCTTGGCTAGGTTTGCCAAAGCCGTTGGCGAAGGCA  
GCACTAGACGGCGAGTCACTTCCGTCTCTTTGTCCACTTCTCTTACCATCAAATCGAAGCCTGCAAGTG  
CCGTCCCT

AGTACTTCGGTAAGGCTTTGGAGAACCCAACCAGACCATTCTTGGCCATCTTAGGTGGTGCCAAGGTTGCT  
GACAAGATTCAATTGATTGACAACCTTGGTGGACAAGGTCGACTCTATCATCATTGGTGGTGGTATGGCTTT  
CACTTCA

GCTGTTTTCAACTATGGTGACTTACCACCTATGTTGACTGGTATTCCAGCTGAACAAGTCACCAGAGTCAT  
CACTGGTGTCCCATGGTACTCCACTAGATTGAGACCAGCCATCTCCAGTGCTCTATCTAAGGACGGTATCT  
ACACTGCT

GATTGCTGAAGCTGTTTTCAACTATGGTGACTTACCACCTATGTTGACTGGTATTCCAGCTGAACAAGTCA  
CCAGAGTCATCACTGGTGTCCCATGGTACTCCACTAGATTGAGACCAGCCATCTCCAGTGCTCTATCTAAG  
GACGGTAT

TTGGCACAATGGTAGACACCGGACTCGTTGGTGTGTAATAACGCACCGGTGTTGGGCCTTTTCAGTGGCCTT  
ATCTCTCAGCACCATCAGCTGCAATGGTGTGAGGGCATCGTTCCACTTACGTCATTTCGATTTCGCTCACTCA  
TTTTCTTG

CCTTCTTGAGGTTTAAAGACGCACTGTTACACACAGTGTCTGGTGTCTTGGGCAAGTTTAGCAACTGTTTC  
CAGCCTTACCTTCAAACACATGTCCCAAGTGTCCACCACACCTTGCACAACATATCTCCACCCTCGCAGG  
CATTAAAG

AAGGAGATCTGCAGTGTGATGTTTATGCTGCGGCACCTTTCACAACGATGATGCTTCCGTCTTCCCTGCTT  
CTTGGAGAGAAGATCCGGATAGATGGCCTCGACGGCCTCCAGTTCTTTCGACCAACTGTTTCGTGATCGTCAT  
CCATTGAG

CTTCAGGTTCAAGCCCAAGTTATAGGTCAACACCAAGCCAGCTGTGGTCAGTGACACTGGGATAGTGGCTG  
CCCCTTCAAAGACCTGACAGGGCCGGCAGGTAGAACATCTTACCCAAAATTTGAGTTTATTGGGTGAT  
TTGTAGGC

TTTGGCTCCAGTTGCTAAGGAATTGCAATCATTGTTGGGTAAGGATGTCACCTTCTTGAACGACTGTGTGCG  
GTCCAGAAGTTGAAGCCGCTGTCAAGGCTTCTGCCCCAGGTTCCGTTATTTTGTGGAAAACCTGCGTTAC  
CACATCGA

TTATCGTAACCAAATTTCTTGTGTTGATGGTGATCCGATGCCTCCTGGTCCATCGACTGTTGATTACCGCT  
GTGCCGACTGGTGATCCGGAACTTCTCATGGGTGTGGGGGATTTAGGATCATCCATGGGAGAGAAGTGGT  
TAGTGAGC

CACAGGCTTCTCCACTTTCTTTGCGAGGAGTTGCCACTGGCTGGTGCTGGTGCTGCTTCTGCTGCTGCTTCT  
GCTGCTGCTTCTGCTTCTGCTTCTTGTGGCCCTTGTACAACGCTTCTTGGTACTTCTCGTCCTCGCTGATG  
CAAGACGT

AGGGTAAAGTAGTGGTCTCTTTAGAAGTAGGAGATCCGTTGATGGCTGTGTTACTCAATGGTGCCACGGAA  
ACCTGGGGAGGTGGTTGCTGTTGTTGAAGTTGCTGCTGTTGCAGTTGCTGTTGTGGTAGTTGTTGTTGGG  
GTTTGAGG

TTTGGTATTTAAGTCAATCTCAGTAGCACCTCGCCTTCCATCTGTTCCCTCTACATCTTCTTTCATCTCTGA  
GTAAAGATCTGATCTCATCTCTATGAGCTGCAAGATGAGCCACTCTCTCTGTGTTGTACCATCACTGCTA  
GTAAATGT

AACTGTTGACACTGTTTCTGTTTCTACAACCAACTACTTCCATCGCAACACTAAGTTGCACAGACTCACAAT  
GCCAACAGGAGGTATCCACTATCTGTAATGGATCCAACCTGTGACGATGTGACTTCAACTGCCACTACTCCT  
CCATCTAC

CACCACACCCACACACCACACCCACACACCCACACACCCACACACCCACACACCCACACCCACACCCAC  
ACACCCACACCCTAACACTACCCTAACACTACCCTATTCTAACCTGATTTTACCTGTCTCCCAACTTACT  
CTCCATTA

GATTCGGACGTGATACCGCCTCTTTGGATAATCTTGTAGACCTGGAAGTAGAAATCCTCATTGTAAGGGTC  
CTCAGTGACAATTTGAGACAACCTGATATCTGGTGATGAAGTCCTTATCACGAGGAGTCATTAACCTGAGT  
ATTTCAAG

ACTCTAGGACACCGAATGGCTCGACCAACTTCAAGAAGGCAGAGATACGTGTGGGTTTTGCAGACAACCTCC  
ACAATACAGCTTGTTCGCTGATGTCGACGACACGACCTCCAAAGTTGTTGGTCAAGTTGGTGATATCGTT  
CAAATGCT

AGTAACTATTAATACCCAAGTTTCTGCTACTTCCGAAGCTACTAGTACTAGCACTCAAGTGTCTGCTACTT  
CTGCGACGGCCACTGCTAGCGAGAGTTCAACCACATCCCAGGTTTCTACTGCTTCCGAAACTATTAGCACT  
CTCGGTAC

TTTGAGCACTTCAACAGAATCAGAATCTTTCATCTGGATATTTGTGCGAAAGGAGTATGCTCAGGTACTGAAT  
GTACGCAAGATGTGCCAACACAATCATCTCACCTGCTTCAACGTTAGCATATTTCCCCTCTGTTTCTACA  
TCATCATC



CCGGAGCCATTGTACTTTGGGGTGAAGGCGCCATTGCTGGAGGTGGTGCAGTAGACCACAAAGATTCCATT  
GGCTTCAGGTCTAGAGGTCCTGCTGCTGCCGTTCCATCGGTCCTAGGGCCGCTAATTCCTTCTGCAGTAGC  
TGCAACAT

CTTGCCCTTGTGAAGCTCGATACCGTTTCGAGGTCTTTTCCACTTCTCTGCCTTCTTGATCACAGGCTTCT  
CCACTTTCTTTGCAGGAGTTGCCACTGGCTGGTGGTGGTGGTGGTGGTGGTGGTGGTGGTGGTGGTGGTGGT  
TGCTTCTG

AATATCCGAACCAATGTCGTCATCCATAGTATCGTTAACATTGTCCACAACATTCTCTCTCAACTTGTCTT  
CCTCTACTTCGTCCTCGGCATCAACACTTGGAGGTGATATCAAAGGTAAAGACCATGAATTAAGGCGCCT  
ATAGCCCA

AACTGTCTTTGCATCCAAGAGAAACGCTGACTCACTACTTATGGTCTTCCAAGCAAAACGAGCTTGTGCTG  
CAGGGCGACCAATACTTCAATGAAGATGCTGCAAGAACGAGTGACATATACAGTAACAACAACAATGACAG  
GTCACTAA

CATCATACCGCTTCTTGCACACTCTAGGACACCGAATGGCTCGACCAACTTCAAGAAGGCAGAGATACGTG  
TGGGTTTTGCAGACAACCTCCACAATACAGCTTGGTTTCGCTGATGTCGACGACACGACCTCCAAAGTTGTTG  
GTCAAGTT

AGATGGAAGTGGGGTAAACATCTTCGATACGGCCAATTCTCAAACCAGATCTGGCCAAAGCTCTCAAAGCAG  
CTTGACCACCTGGACCTGGAGTCTTGGTTCTAGTACCACCGGTAGCTCTGATCTTAACGTGAACGGCAGTG  
ATACCGAC

ATCAGCCATCCCAGTCGGCTCAACCTCCAGGAGTGAATGTCCCAAATCCTCAAGGTGGGATTGCTGCAGTT  
CAATCAGATTTGGAACAGAATCAACGTGTTCTCGTTCACCTCATGGACATTTTAGTTTTCTCAAATTAAGA  
AAATGCTA

AGATCTGAAATGGATACGGATAAGTTAATCTCAGAGGCTGAGTCTCATTTTTCTCAAGGAAACCATGCAGA  
AGCTGTTGCGAAGTTGACATCCGCAGCTCAGTCGAACCCCAATGACGAGCAAATGTCAACTATTGAATCAT  
TAATTCAA

CACCATCCATGCAGCACAACCTCCGATTACAGAAAGTTTTAGTTTTCTTGTCTTTGCCACCAACAAACTGT  
AGAATGGAGATGCAGTAGCAGCAACAAAGTCAGGAAGGTTTACTATCCGAGCAGCCGAAGTGGACGATTCT  
TTCATCGA

GTGGAGTCGACTGAGGCGGAACGTGTGGCAGGGAAGCAGGAGCAGGAGGAGGAGTACCCTGTGGACGCCCA  
CATGCAAAAGTACCTTTACACCTGAAGAGCAAGTCTCGGTGAGGTTCCACCGAAAGGATGCTAGCAAGT  
ATGTGTCTG

AGCCTGAACAAGAAGAGATCGCCCCAAGCTTACCTTCTAGAAACTCGATCCCAGCTCCAAAACAAGAAGAA  
GCACCTGAACAAGCACCTGAAGAAGAAATTGAAGAAGAAGCTGAGGAAGCCGCTCCACAGCTGCCATCAAG  
AAGCTCTG

GGTAGACACCGGACTCGTTGGTGTGTAATACGCACCGGTGTTGGGCCTTTTCAGTGGCCTTATCTCTCAGC  
ACCATCAGCTGCAATGGTGTGAGGCATCGTTCCACTTCACGTCATTGATTGTCCTCACTCATTTTTCTTGT  
CTTATTCC

ATGTGCAGGATTTTCGCTGATCTTTTCGTCTTCGTGCGGAGCTTCCCTCGGTGCTTGTCTTCAAAGGAGTTCT  
TGGCAATGCCATCATACCGCTTCTTGCACACTCTAGGACACCGAATGGCTCGACCAACTTCAAAGAAGGCAG  
AGATACGT

CGAAATTAATTCAGGCTTATCCAGATGTAAGATTTGTCAAGTGCAGCTGGACGAATCACCAGATATTGCC  
AAAGAGTGTGAAGTGACGGCTATGCCACCTTTGTTCTTGGCAAGGATGGCCAACCTCATCGGCAAGATCAT  
TGGAGCTA

TAACTCCGAACAAATAAGAGCTCAACAACAACAGCAGCAATTACAGAAAAGCCGTTTGAATCAGCCATCC  
CAGTCGGCTCAACCTCCAGGAGTGAATGTCCCAAATCCTCAAGGTGGGATTGCTGCAGTTCAATCAGATTT  
GGAACAGA

CAATCGAATCTCACCAAGAGGTAGTGTGACATCGTTATTCCAACCCACAGTTTTGAACCAGATTGAAGAT  
TCTCAGACATAGGAGTTTGTAAAGTGGCATTGTACTCCTCCAGTTCCTTAGCAATTGCCTCTATGTTCAAT  
CGAGGGAA

GCAGTGTTCACACAGTGTCTGGTGTCTTGGGCAAGTTTAGCAACTGTTTCCAGCCTTACCTTCAAACAC  
ATGTCCCAAGTGTCCACCACACCTTGCACAACATATCTCCACCCTCGCAGGCATTAAAGAATTGTCACGAT  
GATATGTG

GTATTATCAACCGGACCCACACTATCCGTTGCCACAGTATATCCCACCACTGAGTACTTCTCACCTGATC  
CAATCGATTACAGAATCAACACTCTGAAGTACCTCAAGCTGAGACAAAGGTGAGAAATAACGTCTTACCA  
CCACACAC

GGCATCACCAATAAACTTGCAGACCAAGAGGTTGTTGACCTCATCACCTCTACGGTGAACCTCTGGGGACT  
GAAAAAGGCGACTCCTCAATTTGTTGCAGAGGAGACAATCAAATTTATTTCAGGCAATAGCCACTAAACACT  
CAGACAAC

GACAACGAGCAATACTGTACCAATGACCACGTTTTGACTATGTGGACTCCTTACAAGGACGGCTACATTTT  
ACAAGGAGGCTTTGCCTCCACGTGAGGCTTCATGAACACTTTGCTATTCAAATACCAGAAAATATTCCAA  
GTCCGCTA

TTGCATCGACAAGATTGGCTGTAGGGGGGCCATTTGCTGCGGAGCAGGAGCCGGAGCCATTGTACTTTGGG  
GTGAAGGCGCCATTGCTGGAGGTGGTGCAGTAGACCACAAAGATTCCATTGGCTTCAGGTCTAGAGGTCCT  
GCTGCTGC

CTTTCAACGTAGATTCAGGTGCCTTGACAGAGGGTAAAGTAGTGGTCTCTTTAGAAGTAGGAGATCCGTTG  
ATGGCTGTGTTACTCAATGGTGCCACGGAAACCTGGGGAGGTGGTTGCTGTTGTTGAAGTTGCTGCTGTTG  
CAGTTGCT

GATGAAGAAACAAGTTTCATTAATATCAACCTCAGCTGCCTCATCGGAGAAAGCCTCGTCCACCCTTTCTTC  
AACTGCACAACCTCATAGGACATCTCACTCTTCTCTTCATTTCGAGCTACCAGTCACTGCTCCATCATCCT  
CTAGTTTA

TCGTGGCAGCTTCTCGGTGCTTGTCTTCAAAGGAGTTCTTGGCAATGCCATCATAACCGCTTCTTGCACA  
CTCTAGGACACCGAATGGCTCGACCAACTTCAAGAAGGCAGAGATACGTGTGGGTTTTGCAGACAACCTCCA  
CAATACAG

CTTCAACTAATAAAATGTCACACACTAATAAGATCGCATAACGTGTTGAACAATGACACGGAGGAAACAGCC  
TCGCCCTCTTCCGTTGGTTGTTTTGACAAGAAACAGCTCACTAAATTACTGATACATACTCTAAAGGAGCT  
GGGCTACG

CTTCTCGGTGCTTGTCTTCAAAGGAGTTCTTGGCAATGCCATCATAACCGCTTCTTGCACACTCTAGGACA  
CCGAATGGCTCGACCAACTTCAAGAAGGCAGAGATACGTGTGGGTTTTGCAGACAACCTCCACAATACAGT  
TGTTTCGC

TGTAGTTCAGATGAGATAGCGACTCAATTTCCACGCCTGGGGCAAAGATGTTTACACAGGGCCCCAATTG  
CTGAACTTGGCAATCGTGTCAATGTGGTCATCAAAGGCCCTACGGTGATAACGTTTTCTGCAGACGCAGG  
TGAGGCC

TACAGGTCCAAGGAACAACCTTCTCGCCACTTACTACACCTTTCCAGTTGTCATCCGAAGTGTGTCGCA  
TATTGAAATTGACGACTCGACAGGTCTACGTGAAACAGAGTTGTCATTATTACAGAGTCTCAGACTGCCCA  
CCACTCCA

GGAGCAGGAGCCGGAGCCATTGTACTTTGGGGTGAAGGCGCCATTGCTGGAGGTGGTGCAGTAGACCACAA  
AGATTCCATTGGCTTCAGGTCTAGAGGTCCTGCTGCTGCCGTTCCATCGGTCTAGGGCCGCTAATTCCTT  
CTGCAGTA

GCCGTTTCTTTGTGGGGTTGATGGCTCCCACTTCAGGTTCAAGCCCAAGTTATAGGTCAACACCAAGCCAG  
CTGTGGTCAGTGACACTGGGATAGTGGCTGCCCTTCCAAAGACCTGACAGGGCCGGCAGGTAGAATCTT  
TCACCCAA

CGCTTGAAGAATAATACTGAGGTGAACACACCCACGCCAAAACCCATGGCAGTCTTGACCAGCATGTTGGA  
CAGGACAATATCCCACTTAGTGTCGAGGATCGTGGACACGGAGCTGCCATTCTTGTTAGAATCCTTGGAGG  
GAGTGCTT

GTATTCATGCTGCGGCACTTTCACAACGATGATGCTTCCGTCTTCTGCTTCTTGGAGAGAAGATCCGGAT  
AGATGGCCTCGACGGCCTCCAGTTCTTCGACCAACTGTTCTGTGATCGTCATCCATTGAGCTTTTCTTCTT  
CTCTCTTT

CCAAAGCCGTTGGCGAAGGCAGCACTAGACGGCGAGTCACTTCCGTCTCTTTGTCCACTTCTTCCACCA  
TCAAATCGAAGCCTGCAAGTGCCGTCCCTCTTGGTTCCGATGACAATTGCAGGATAAAAAGTGGTCGTTTC  
AGGATATC

TGGTTCTGGCGGCGGGAGCCAAAGTATGGGTGCTTCCGGCCTGGCTGCCTTGGCTTCTCAATTCTTTAAGT  
CAGGTAACAATTCCAAGGTGAGGACAAGGTCAAGGTCAAGGTCAAGGTCAAGGACAAGGTCAAGGTCAA  
GGTTCTTT

TTGTGATTAGCCTTTCTGTCTGATGACAGGATAGAGTCGACCTCCATTCTGTCTTCTCTGTTATCGTAACC  
AAATTCTTGCTGTTGATGGTGATCCGATGCCTCCTGGTCCATCGACTGTTGATTACCGCTGTGCCGACTGG  
TGATCCGG

TGTGGGGTTGATGGCTCCCACTTCAGGTTCAAGCCCAAGTTATAGGTCAACACCAAGCCAGCTGTGGTCAG  
TGACACTGGGATAGTGGCTGCCCTTCCAAAGACCTGACAGGGCCGGCAGGTAGAATCTTTCACCCAAAA  
ATTTGAGT

GGCATAACGGCGTTATTACTGTTGTGGAACCTTCTCCTTTGAGGACCATTGCTGTTATGGTGATGACTGTG  
GTGATGATTACGGTGGTGGGTGGTTGTTGCTGTTGTGTAGATTGACCATTTTCTTGAGAGGTAGCGTCTT  
TTGAATCT

CTGCTGTGTGTTACAGAACTCGCTGATCGGGCTGCCAAGGGCAAGTTCTCCACAGACGATGAAGAGGCC  
ACGTCCAAGTTCATCCAGGCAAGGGCGATCAGAAGGAAAGTTCTTAGATATCTGCAATTGGTCACGGAGGG  
TGAGTTTT

CCCACTTAACGAAATTAATTCAGGCTTATCCAGATGTAAGATTTGTCAAGTGCGACGTGGACGAATCACC  
AGATATTGCCAAAGAGTGTGAAGTGACGGCTATGCCACCTTTGTTCTTGGCAAGGATGGCCAACCTCATCG  
GCAAGATC

TTCTACAACCAACTACTTCCATCGCAACACTAACTTGCACAGACTCACAATGCCAACAGGAGGTATCCACT  
ATCTGTAATGGATCCAACCTGTGACGATGTGACTTCAACTGCCACTACTCCTCCATCTACGGTTACTGATAC  
TATGACAT

ATCGAGTACATGAGGATTAAGTCCGGCGTGGCCGATGTTACGGAGTGGACGGCGTGCAGGGTGAGGGTGT  
CATCGACAGCAAATGCTGGAAGAGTTCAAGGACAACGTGAGATACACCTTGGAAAATGACCCTGAGGAAG  
GAGCCGAT

TTATTACGAGCGTTGCGTCCTTGGTAAGGTTTAAACTGTGGTGGGAAGCCTTGGTTCTGAGGCATACCGGC  
GTTATTACTGTTGTGGAACCTTCTCCTTTGAGGACCATTGCTGTTATGGTGATGACTGTGGTGATGATTAC  
GGTGGTGA

TCAGGTAACAATTCCCAAGGTCAGGGACAAGGTCAAGGTCAAGGTCAAGGTCAAGGTCAAGGACAAGGTCAAGGTCA  
AGGTTCTTTTACTGCTTTGGCGTCTTTGGCTTCATCTTTTCATGAATTCCAACAACAATAATCAGCAAGGTC  
AAAATCAA

CTCTGGAGCGTCTGTAGCCTTTGTTTTAGTAAAGATTCTAGCCCCACCAAACCATGCTTGAATTCACCAA  
AGCAAGACATGGTCTCCAAGTGGCAAAATCCAACGTTTTCTTGTTC AACGATAAACTTTAAGGCATCCGAA  
TCACAGTC

CGTGTAGTAGTTTTGGTATTTAAGTCAATCTCAGTAGCACCTCGCCTTCCATCTGTTCCCTCTACATCTTCT  
TCATCTCTGAGTAAAGATCTGATCTCATCTCTATGAGCTGCAAGATGAGCCACTCTCTCTGTGTTGTACC  
ATCACTGC

AGATTTCAGGTGCCTTGACAGAGGGTAAAGTAGTGGTCTCTTTAGAAGTAGGAGATCCGTTGATGGCTGTGT  
TACTCAATGGTGCCACGGAAACCTGGGGAGGTGGTTGCTGTTGTTGAAGTTGCTGCTGTTGCAGTTGCTGT  
TGTGGTAG

CAGTCCAAACAAGAGCGTTTTCGTCGAAAGTAATAGGTTGTTTCAGGAACAAATTCTCTCATTAGTAGAACTG  
TGTTTTGAATGTTTGCCTGCTTCAGCACCCAAGTCTTGCTGCTGCGAACACAGTACAACCTTCAGACTTGTCT  
TTGTCCAA

GAGTGCCTGCATTTTCATTCAATCACTAATAAACTATTACTTGGTCCCCTGACCGAAGAAGACAAGACATG  
GTCAAGGGCATTGTTGGTCATCACGTGAGCGGGGATCTTAAGTGGCTGGAGACTATTGGTGTCAAATTC  
CTGGCAGA

CTTACCACCTATGTTGACTGGTATTCCAGCTGAACAAGTCACCAGAGTCATCACTGGTGTCCCATGGTACT  
CCACTAGATTGAGACCAGCCATCTCCAGTGCTCTATCTAAGGACGGTATCTACACTGCTATTCCAAAATAG  
AGACATGC

GACCAAACCTTCAAAAACCTATTCCAACCTTTGTTGACGCCACATCGTCAATTACCACCAACATTGAGGTCATC  
CAGTATGGCACCAACAAGTGGTTCTGATTCAATCTCACACAACCTTTACGAGCCCCCTCTAAAACAAGTG  
GTAACCTAC

TGACAAAATTAAGTGTGCTGTTGTAGTTTCAGATGAGATAGCGACTCAATTTCCACGCCTGGGGCAAAGATGT  
TTACACAGGGCCCCCAATTGCTGAACTTGGCAATCGTGTCAATGTGGTCATCAAAGGCCCTACGGTGATA  
ACGTTTTTC

TTTCCAAGTCTTGCATCGACAAGATTGGCTGTAGGGGGGCCATTTGCTGCGGAGCAGGAGCCGGAGCCATT  
GTACTTTGGGGTGAAGGCGCCATTGCTGGAGGTGGTGCAGTAGACCACAAAGATTCCATTGGCTTCAGGTC  
TAGAGGTC

ACTATCCGTTGCCACAGTATATCCCACCACTGAGTACTTCTCACCTGATCCAATCGATTACACAGAATCAA  
CACTCTGAAGTACCTCAAGCTGAGACAAAGGTGAGAAATAACGTCTTACCACCACACACTTTAACATCAGA  
AGAAAACCT

GTGATTGTACAGCATCAGTGA AAACACTAGTGGGTTCCGAACTGTCAGCCAAAACACTAGTGGGTTCCGAA  
TTGTGAGCCAAAACACTAGTGGGTTCCAAATTGTGAGCCAAACACTGGTGTATTCCGAATTATCAATCAA  
GGCACTGG

CATGCTATGATGCCCACTGTGATCTCCAGAGCAAAGTTTCGTTTCGATCGTACTGTTACTCTCTCTCTTTCAA  
ACAGAATTGTCCGAATCGTGTGACAACAACAGCCTGTTCTCACACACTCTTTTCTTCTAACCAAGGGGGTG  
GTTTAGTT

TAAGTCTTTGGAAGTCGTAAGGATAAACTGGAATCTTGTGACCACGTCAAAGACGTTATGTCTTGAAAGT  
GTCCCGCATGCACCCTATGGCGGACGAAGGGAGCAAACCTGTCTGTCTTTATTAACATCTGGAGTCTTCCAA  
ATCTGTAA

AAGGCTTGCTTTTGGCAACAGTACAGGTCCAAGGAACAACCTTCTCGCCACTTGACTACACCTTTCCAGTTG  
TCATCCGAAGTGCTGTCGCATATTGAAATTGACGACTCGACAGGTCTACGTGAAACAGAGTTGTCATTATT  
ACAGAGTC

CGACAAGGGCTGGAGTGTAACATGTTCAACCACAGAATCCACAAAGTCATTGACGAAGTTCTCCTTGGAT  
ACGAGCAGGCTGCCAAGTGCCTTGAACCAGAGCCCTGCGTAGATTGCTACAACCTGGAAGTTTATTCCAAGC  
AGAGACTG

CCGTGTTGTCCATGTCCATAAGGTTCGAGTGCCTTAGATGCCGTTGAGGTGGTGGAGGTGGAGGCAATGGC  
GGTTTTAGGTGTGGAGACTTGGGCTTTGGGGCAGTGGGGGAGTATTCTGCTCCTGCTGGAGCTGCGTATT  
GGGCTTAG

CCATTGCTGGAGGTGGTGCAGTAGACCACAAAGATTCCATTGGCTTCAGGTCTAGAGGTCTGCTGCTGCC  
GTTCCATCGGTCTTAGGGCCGCTAATTCTTCTGCAGTAGCTGCAACATATGATCTAGCCGTGGCACCGAC  
GCCATTAC

TGGTGAGCTAATCGAGTACATGAGGATTAAGTCCGGCGTGGCCGATGTTACGGAGTGGACGGCGTGCAGG  
GTGAGGGTGTTCATCGACAGCAAATTGCTGGAAGAGTTCAAGGACAACGTGAGATACACCTTGGAAAATGAC  
CCTGAGGA

CCAGCTCCAAAACAAGAAGAAGCACCTGAACAAGCACCTGAAGAAGAAATTGAAGAAGAAGCTGAGGAAGC  
CGCTCCACAGCTGCCATCAAGAAGCTCTGCAGCTCCTCCTCCGCCTCCAAGACGAGCAACTCCAGAGAAAA  
AGCCAAAG

ATGGTTCTCCTGCAGCTATGTTGCTTTCTATATCAGCGATTGGACCTGGAGTCTGAGAGTCAGCGTCATCG  
TTTTAAGTCAACGGTTGGCGTTTCTTGTTCATTTCATCTGTCTGTAATGTGTAGATCAAATTTTTCAATTC  
GTTATAAT

CTGAATGTACTCATTGAAGGAGTCGGTGGCCAACTTAACGACAGCGGAGTCTTCAGGGGCCACAGCCTCTT  
GTTGGGCGAAAACAGAGGAGGCGAGCAGGAGGACCATGACAGGACGGCACCAGCAGAAAACCTTCATA  
ACGGGATA

CACCTGGGACATCAGCTGTTCCAGAGAACCATCATCATGTCTCTCCTCAACCTGCTTCAGTACCACCTCCA  
CAGAATGGACAGTACCAACAGCACGGCATGATGACCCCAAACAAGCTATGGCCTCTAACTGGGCACATTA  
CCAACAAC

ATGTTGAATCTCATGTTGTATGTGTACGACCAGTCAACATAGAGTCTCAAGATGTGCAGGGCAAAGATTGC  
CGCAACTGACGCAGTGAACGCTTGTGCTATCTTGGGGTACAGGAACATGGAAGTCATTCTTGCAAATATTG  
CATGAAAC

GCAATGTTGGACTTGGCAATGTTCTGTGCACTTTCTTCGTGGTTTTTCGTGCACTGGCTGGTGAAAAAGCG  
GATCATCAACTGGAAGTGGACTGGGTTTCGTTGCAGTGAGCATCTTCGAGTTGGCTTTTCATCCCCGTGACGT  
TCCCCATT

TGCGTCCACTTTGCAGAGGCATTTTAGTTGCGCCAACCACAGGGCCTGGAGAAGGAGTGTGGACATACCG  
ATGGGTGAAGGCGAAGCTTGAACCTGGAACCTGTACAGGACCCATTGGCATTGATTTCATATTACATTAAC  
GCCAGGAG

GTTTAAAGACGCACTGTTCCACACAGTGTCTGGTGTCTTGGGCAAGTTTAGCAACTGTTTCCAGCCTTCAC  
CTTCAAACACATGTCCCAAGTGTCCACCACACCTTGCACAACATATCTCCACCCTCGCAGGCATTAAGAA  
TTGTCACG

TCTCCGTTGTATATTGGTACTGAATTCAAGTTCAATTCGCCATGTGTCTCTCTGGTCTCAAATTCGATTC  
AGTCTTGGCGAATCCACGACGTCCATGTACGGCTTGGACAGTCCAAACAAGAGCGTTTTTCGTGAAAGTAA  
TAGGTTGT

TTCGTCAAACGCCTCTTCAGAGAGTTGAGGCAAACCGTACTTCAAGTCTTCAGTCATGTCGTGGATGGCAA  
ATAGAGGGAATTGTTCTTCATGTTCAAGTTGCCGGCGTGTCTGCCGAATTTTCTGGCATCGATGCTAACA  
AAGTTCAT

GTTGTGGAACCTTCTCCTTTGAGGACCATTGCTGTTATGGTGATGACTGTGGTGATGATTACGGTGGTGAG  
GTGGTTGTTGCTGTTGTGTAGATTGACCATTTTCTTGAGAGGTAGCGTCTTTTGAATCTTCCTCACCTACT  
GCCGATTC

ACCAGCAACAAGGCCAAAACCTATCAGCATCAACAACAGGGTCAGCAGCAGCAACAAGGCCACTCCAGTTCA  
TTCTCAGCTTTGGCTTCCATGGCAAGTTCCTACCTGGGCAATAACTCCAATTCAAATTCGAGTTATGGGGG  
CCAGCAAC

CCCTTTGTATTAGAACACATTTGAATAACCAACCAAATTTGCTCTCTGCCTTTTCGAGTTCAGAGAGTCC  
TTGCTGAGAAGTGAGTTCCTGGTCAGTGAAATAATTCAAAGTTATACATCCCTACGATCTTCCTTACTAGA  
TGCACTAA

ATTTCAATCAATCACTAATAAACTATTACTTTGGTCCCGGTGACCGAAGAAGACAAGACATGGTCAAGGGCA  
TTTGTGGTTCATCACGTGAGCGGGGATCTTAAGTGGCTGGAGACTATTGGTGTCAAATTCCTGGCAGAGG  
GTATGAAG

AACTACTTCCATCGCAACACTAACTTGCACAGACTCACAATGCCAACAGGAGGTATCCACTATCTGTAATG  
GATCCAACGTGTGACGATGTGACTTCAACTGCCACTACTCCTCCATCTACGGTTACTGATACTATGACATGT  
ACTGGATC

AACGGCAGAGCATGTAGCTATCAGATCCAAATTGCAATATCGTCTAGAGCTGGCACAGGGAGCGGTAGGTT  
CAGTACAGATCCCTGTTGTAGAGGTTGATGAACTACCGGAGGGATACGACCGGTCCTGAGAAAAGAGAAAG  
GGAACACT

TAAGGCTTTGGAGAACCCAACCAGACCATTCTTGGCCATCTTAGGTGGTGCCAAGGTTGCTGACAAGATTC  
AATTGATTGACAACCTTGGTGGACAAGGTCGACTCTATCATCATTGGTGGTGGTATGGCTTTACCTTCAAG  
AAGTTTTT

CCAGGTTCTTTGGGTTTTGTTGCCATCTGCGTCTTTGGCTCTTTGCCAGACAAGAACACCGCATTTGGTTTT  
GTACGAACCATGCCACGGTTCTGCTCCAGATTTGCCAAGAATAAGGTCAACCCTATCGCCACTATCTTGT  
CTGCTGCA

GCCATACAGGAAATGCACGGCGCTTGAAGAATAATACTGAGGTGAACACACCCACGCCAAAACCCATGGCA  
GTCTTGACCAGCATGTTGGACAGGACAATATCCCACTTAGTGTGAGGATCGTGGACACGGAGCTGCCATT  
CTTGTTAG

ATTCTAATGATGGAGATGGTGTGAAAAAGTTCAAAGTGACCAGGGAACCGAGGATCAGCAAATGGAGAAG  
GATCAGGACACTGTTATCAACGAAGATAGAGTTGCTGGTGAAGAAATTTGCCTAACGAAGATTCAACTGA  
TGCTGACT

CAACTTTCTCCCACGTCTTTTCATGAGCTCCTTCTTTCTTAGAATGAAACTCTTGGCAGACTCCTTGTCT  
TTGCCCTCCCTTCAAGCGCTGGCGCAGTTGTTTTCTTCAAGTTGACGTTCTCCTCGTCCATGGTCACACCGTC  
CAAATTC

AACAAGAAGAAGCACCTGAACAAGCACCTGAAGAAGAAATTTGAAGAAGAAGCTGAGGAAGCCGCTCCACAG  
CTGCCATCAAGAAGCTCTGCAGCTCCTCCTCCGCTCCAAGACGAGCAACTCCAGAGAAAAAGCCAAAGGA  
AAATCCTT

GGATGATGATGAAGACGAGGCTGCTCAACCTCCTTTGCCTTCGAGGAATGTTGCGTCAGGAGCACCAGTGC  
AAAAAGAAGAGCCTGAACAAGAAGAGATCGCCCCAAGCTTACCTTCTAGAAACTCGATCCCAGCTCCAAA  
CAAGAAGA

CGTTGTTGTCTTTCCAAGTCTTGCATCGACAAGATTGGCTGTAGGGGGGCCATTTGCTGCGGAGCAGGAGC  
CGGAGCCATTGTACTTTGGGGTGAAGGCGCCATTGCTGGAGGTGGTGCAGTAGACCACAAAGATTCCATTG  
GCTTCAGG

CTCTTCGATCTGCGTCCACTTTGCAGAGGCATTTTAGTTGCGCCAACCACAGGGCCTGGAGAAGGAGTGTT  
GGACATACCGATGGGTGAAGGCGAAGCTTGAAGTGAAGTGTACAGGACCCATTGGCATTGTGATTTCATAT  
TCACATTA

TCTGTGCGAGTTGGCACAATGGTAGACACCGGACTCGTTGGTGTGTAATACGCACCGGTGTTGGGCCTTT  
CAGTGGCCTTATCTCTCAGCACCATCAGCTGCAATGGTGTGAGGGCATCGTTCCACTTCACGTCATTTCGAT  
TCGTCACT

TGGGTTTTGTTGCCATCTGCGTCTTTGGCCTCTTTGCCAGACAAGAACACCGCATTGTTGGTTTTGTACGAACCA  
TGCCACGGTTCTGCTCCAGATTTGCCAAAGAATAAGGTCAACCCTATCGCCACTATCTTGTCTGCTGCAAT  
GATGTTGA

TCGACGGCCGTCTTGGCTATCTGGTTCCGCAACAGCAACGAGGCGTCTTGCACCAGTTGTTTTCGGTCTAT  
GGAAAGGATGTAGCCAACAAAGGTGTCGTACGAGCACTTGGACGAGTCGTACACAATCCGGACCACGTCGC  
CTGCCTTC

ACGTACGGATTTTCATTTTCGTCGCACCAGGGGTGCTATTTAAGAAAGTTTCAGGCGAGTAAGCTCCAACAGTG  
ACTGAGAAAGTAGCAAAGAGCCAAACAACCCCATAGAGCTTTCTGACGCTGACGAATCGAGATTGGCGA  
GGTATGAT

TGATGGTTCCGTTGTGGAATACTACCCCGGTTTTAGATCTATGCTGAGACACGCCTTAGCCTTGTACCCT  
TGGGTGCCGAGGGTGAGAGGAAGGTGCACTTGAAGATTGCCAAGGATGGTTCCGGAGTGGGTGCCGCCTTG  
TGTGCGCT

CATTTGCTGCGGAGCAGGAGCCGGAGCCATTGTACTTTGGGGTGAAGGCGCCATTGCTGGAGGTGGTGCAG  
TAGACCACAAAGATTCCATTGGCTTCAGGTCTAGAGGTCCTGCTGCTGCCGTTCCATCGGTCTTAGGGCCG  
CTAATTCC

ACCATTACTAACTCTACCGTTACATTTGGATCGACCAGCAAGTATCCATCTACTAGTGTATCTAACCCAAC  
AGAAGCCAGCCAACATGTGAGCTCTAGTGTGAACTCACTCACTGATTTTACTTCAAATTCAACCGAAACCA  
TCGCAGTT

ACTGGTAGGATATTCTGCACCAACACCAATACCTACCAAACCTCTCATAACTGTTAACATCCAAAACATGC  
CAGGTACAGTAGTACCGTGAGAGGCAGCACACAGAGCACTACCAATAACCAAGATAGCAGTGGCCACAAGG  
ATACAAGA

CCAACTAAGGAAGCCCATGATCGATGCATATGTGGCGGAGATGAGGCAGAAGTTTTGATGCCTCCTATGGAC  
AATCCAGGGCGCAATTGGAAGCCAAACTGGCGCAGGTGGACAGTGAATGGCATATGGTACATGGTGATGTG  
CATGCAA

GAGAACCCAACAGACCATTCTTGGCCATCTTAGGTGGTGGCAAGGTTGCTGACAAGATTCAATTGATTGA  
CAACTTGTTGGACAAGGTGACTCTATCATCATTGGTGGTGGTATGGCTTTCACCTTCAAGAAGGTTTTGG  
AAAACACT

CGGAAGGATCCGATGGAGAATTTCTTCTCAATTTTGTGTCGATGAACTGTCTCCATGACCTGTTGGAATT  
CGAAGTGAATTGTTGGAATGCTGTGGGATTTTTGAACCTACCAAATACTCCTCTGCGTATGCGAGGTTGA  
CCAGCAA

TGTCTTGAAGCCAATCCCCACTGTGCTAGCAGTAGCGCTAGCTTGTATGCTGCTGCTGCTGCTGCTTCTT  
GATGATGGTGATGTTTCGCCAGTAGAGTCTCAGTTGCTGATGGTATTGAAGTTGTCATTTCTAGTTTTAT  
CGTTAATG

TGGTAGAGTCTGTGTCTACGATGTGGTCAACGACAAGGGCTGGAGTGTAACATGTTCAACCACAGAATCC  
ACAAAGTCATTGACGAAGTTCTCCTTGATACGAGCAGGCTGCCAAGTGC GTTGAACCAGAGCCCTGCGTA  
GATTGCTA

ATATTGGTACTGAATTCAAGTTCAATTCGCCATGTGTCTCTCTGGTCTCAAATTCTGATTCAAGTCTTGGCG  
AATCCCACGACGTCCATGTACGGCTTGGACAGTCCAAACAAGAGCGTTTCGTGCGAAAGTAATAGGTTGTTCC  
AGGAACAA

CAATGCTAAGTGGTTCTGGCGGGGAGCCAAAGTATGGGTGCTTCCGGCCTGGCTGCCTTGGCTTCTCAA  
TTCTTTAAGTCAGGTAACAATTCCCAAGGTCAAGGACAAGGTCAAGGTCAAGGTCAAGGTCAAGGACAAGG  
TCAAGGTC

ACCTTTGTTGGATTCCGACGTGATACCGCCTCTTTGGATAATCTTGTAGACCTGGAAGTAGAAATCCTCAT  
TGTAAGGGTCTCAGTGACAATTTGAGACAACCTGATATCTGGTGATGAAGTCCTTATCACGAGGAGTCATT  
AAACCTGA

ACTTGGCAATGTTCTGTGCACTTTCTTCGTGGTTTTCTGTGCACTGGCTGGTGAAAAAGCGGATCATCAAC  
TGGAAGTGGACTGGGTTTCGTTGCAGTGAGCATCTTCGAGTTGGCTTTTCATCCCCGTGACGTTCCCCATTTA  
CGTCTACT

GCAAGCACCAAGTCGTGCGACTGAATGTACTCATTGAAGGAGTCGGTGGCCAACTTAACGACAGCGGAGTC  
TTCAGGGGCCACAGCCTCTTGTGGGCGAAAACAGAGGAGGCGAGCAGCAGGGAGGACCATGACAGGACGG  
CACCAGCA

GGCGGGAGCCAAAGTATGGGTGCTTCCGGCCTGGCTGCCTTGGCTTCTCAATTCTTTAAGTCAGGTAACAA  
TTCCCAAGGTCAAGGACAAGGTCAAGGTCAAGGTCAAGGTCAAGGACAAGGTCAAGGTCAAGGTTCTTTTA  
CTGCTTTG

AATCACAAGACATTTTTAATATCATCGATCCGGATGATGACGCCTCTTTCTCCTCTCCACCCACCGGATC  
AACTTTTTGAGGATAACTTCTCACACGATCTGACTGTGACCTTTCAAGAATGGAAGACTATCCAAGACAC  
CACAGACG

TCCAACTCTTGTGACGCCACATCGTCATTACCACCAACATTGAGGTCATCCAGTATGGCACCAACAAGTG  
GTTCTGATTCAATCTCACACAACCTTACGAGCCCCCTCTAAAACAAGTGGTAACACTACGATGTTTTGACT  
TCAAACCTC

GAAATCGGTGACTCCATCTTCGACAAGGCTGGTGTGAAATCGTTCCAAAGTTGATGGAAAAGGCCAAGGC  
CAAGGGTGTGCAAGTCGTCTTGCCAGTCGACTTCATCATTGCTGATGCTTTCTCTGCTGATGCCAACACCA  
AGACTGTC

ACTATGTTCTGAATCAACTGCAAGTGGAAGTTACAATACCAGGACTGGTCAAGCTCTTCTCTTCCGCTG  
TCACAAACCACTTGGGTTGTCATCAACACAACATAACACAAGGGTCTGTAACGTCAACCACATCCCCGGC  
TTATGTTT

GTCTTCTCTGTTATCGTAACCAAATCTTGTGTTGATGGTGATCCGATGCCTCCTGGTCCATCGACTGTT  
GATTACCGCTGTGCCGACTGGTGATCCGGAACCTTCTCATGGGTGTGGGGGATTTAGGATCATCCATGGGA  
GAGAACTG

GATAACGTGATCCTGCCACAGGAGTCCATGGAGGTTTTGCCACGGTCGTCTACCACGTCGCTGGTGGAGCC  
AGTGGAGTCGACTGAAGGAGTGGAGTCGACTGAGGCGGAACGTGTGGCAGGGAAGCAGGAGCAGGAGGAGG  
AGTACCCT

GGAACCGGCTGCAGCAGTCCAGGACTCTGGACCTCTTGGATCTGTTTCATCTCACAAAGGCGTGAAGTTTACA  
GTCATGTACAATGATGACAAGCTGCTGCAAAGGCTGAGAGGGATGGCTACGAACTCTGAAAACAGCGGGTC  
CGGTGAAA





GTTGGTCAGGCTTGGCTTGTCTTAGTCTTAGGCTTAGGCTTCTCTCTGGTGTGGGTGTGTGGGTGTGTGGG  
TGTGGTGTGGGTGTGGGTGTGGTGTGGGTGTGGTGTGGTGTGGTGTGGTGTGGTGTGGTGTGGTGTGGTGTGGT  
TATATATA

CACACCCACACACCACACCCACACCCACACACCCACACCCACACACCACACACCACACACCACACCCACACCCA  
CACCCACACCACACCACACCACACCACACCACACCACACCACACCACACTACCCCTAACACTACCC  
TATTCTAA

TGAGAGACAGGTTGGTCAGGCTTGGCTTGTCTTAGTCTTAGGCTTAGGCTTCTCTCTGGTGTGGGTGTGTG  
GGTGTGTGGGTGTGGTGTGGGTGTGGGTGTGGTGTGGTGTGGTGTGGTGTGGTGTGGTGTGGTGTGGTGTGGT  
GTGTGGTG

CACCACACCCACACCCACACACCCACACCCACACACCACACACCACACACCACACCCACACCCACACCCACACC  
ACACCCACACCCACACACCACACCCACACCCACACACCACACACTACCCCTAACACTACCCTATTCTAAC  
CTGATTTT

CTTAGTCTTAGGCTTAGGCTTCTCTCTGGTGTGGGTGTGTGGGTGTGTGGGTGTGGTGTGGGTGTGGGTGT  
GGTGTGGGTGTGGTGGGTGTGGTGTGGTGTGGTGTGGTGTGGTGTGGTGTGGTGTGGTGTGGTGTGGTGTGGT  
GCATGCTG

CTCAGCAGCAGAGGAAGTCTCAGCAGCAGAAGAAGTCTCAACAGCAGAGGAAGTCTCAACAGCAGAGGAAG  
TCTCAACAGCAGAGGAAGTCTCAGCAGCAGAGGAAGTCTCAACAGCAGAAGAAGCCTCCACAATAGAGGCC  
TCAGTAGT

ACACCCACACACCCACACCCACACACCACACACCACACACCACACCCACACCCACACCCACACCCACACCCACAC  
CCACACACCACACCCACACCCACACACCACACACTACCCCTAACACTACCCTATTCTAACCTGATTTTAC  
CTGTCTCC

TAGAGCAACTACCAGAATCTGTTGTGCGATGCCCCAGTCGAAGAACAGCACCAAGAACCACCACAGGCTCCA  
GATGCTCCACAAGAACCACAAGTTCCACAGGAATCTGCTCCACAGGAATCTGCTCCACAAGAACCACCAGC  
TCCACAAG

AAATCTCAACAGCAGAGGAAGTCTCAACGGCAGAGGAAGTCTCAGCAGCAGAGGAAGTCTCAGCAGCAGAA  
GAAGTCTCAACAGCAGAGGAAGTCTCAACAGCAGAGGAAGTCTCAACAGCAGAGGAAGTCTCAGCAGCAGA  
GGAAGTCT

AGCAGAGGAAGTCTCAACGGCAGAGGAAGTCTCAGCAGCAGAGGAAGTCTCAGCAGCAGAAGAAGTCTCAA  
CAGCAGAGGAAGTCTCAACAGCAGAGGAAGTCTCAACAGCAGAGGAAGTCTCAGCAGCAGAGGAAGTCTCA  
ACAGCAGA

ACAGCAGAAGAAATCTCAACAGCAGAGGAAGTCTCAACGGCAGAGGAAGTCTCAGCAGCAGAGGAAGTCTC  
AGCAGCAGAAGAAGTCTCAACAGCAGAGGAAGTCTCAACAGCAGAGGAAGTCTCAACAGCAGAGGAAGTCT  
CAGCAGCA

CAGAGGAAGTCTCAGCAGCAGAGGAAGTCTCAGCAGCAGAAGAAGTCTCAACAGCAGAGGAAGTCTCAACA  
GCAGAGGAAGTCTCAACAGCAGAGGAAGTCTCAGCAGCAGAGGAAGTCTCAACAGCAGAAGAAGCCTCCAC  
AATAGAGG

GAGGAAGTCTCAGCAGCAGAAGAAGTCTCAACAGCAGAGGAAGTCTCAACAGCAGAGGAAGTCTCAACAGC  
AGAGGAAGTCTCAGCAGCAGAGGAAGTCTCAACAGCAGAAGAAGCCTCCACAATAGAGGCCTCAGTAGTGG  
AGGGAATT

GTCTCAACGGCAGAGGAAGTCTCAGCAGCAGAGGAAGTCTCAGCAGCAGAAGAAGTCTCAACAGCAGAGGA  
AGTCTCAACAGCAGAGGAAGTCTCAACAGCAGAGGAAGTCTCAGCAGCAGAGGAAGTCTCAACAGCAGAAG  
AAGCCTCC

TTGTTTGGGGTCATCATGCCGTGCTGTTGGTACTGTCCATTCTGTGGAGGTGGTACTGAAGCAGGTTGAGG  
AGAGACATGATGATGGTTCTCTGGAACAGCTGATGTCCCAGGTGTTGTCTCTTGTGAGAATTAACCTTAG  
TGAATCT

GAAACTCACGTAGAGCAACTACCAGAATCTGTTGTGCGATGCCCCAGTCGAAGAACAGCACCAAGAACCACC  
ACAGGCTCCAGATGCTCCACAAGAACCACAAGTTCCACAGGAATCTGCTCCACAGGAATCTGCTCCACAAG  
AACCACCA

AGAAGTCTCAACAGCAGAAGAAATCTCAACAGCAGAGGAAGTCTCAACGGCAGAGGAAGTCTCAGCAGCAG  
AGGAAGTCTCAGCAGCAGAAGAAGTCTCAACAGCAGAGGAAGTCTCAACAGCAGAGGAAGTCTCAACAGCA  
GAGGAAGT

TCTCAACAGCAGAAGTCTCAACAGCAGAAGAAATCTCAACAGCAGAGGAAGTCTCAACGGCAGAGGAAGTC  
TCAGCAGCAGAGGAAGTCTCAGCAGCAGAAGAAGTCTCAACAGCAGAGGAAGTCTCAACAGCAGAGGAAGT  
CTCAACAG

TTAGAATAAGAAAGCGACACCGGCAGCGACGGCAGCACCGAAGACACCAGCACCCAAAGCGTTGGAAGCAG  
CAGCACCAGTGGAGATCTTGGTGCTGGTGGTGTGGAACCGTTGGTACGGTTGGAACCATTGGTAGAAACG  
TTAGCAGC

ATTAAAGAACTTAGAATAAGAAAGCGACACCGGCAGCGACGGCAGCACCGAAGACACCAGCACCCAAAGCG  
TTGGAAGCAGCAGCACCAGTGGAGATCTTGGTGCTGGTGGTGTGGAACCGTTGGTACGGTTGGAACCATT  
GGTAGAAA

AGTAGAGGAAGAAGAAGAAGTCTCAACAGCAGAAGTCTCAACAGCAGAAGAAATCTCAACAGCAGAGGAAG  
TCTCAACGGCAGAGGAAGTCTCAGCAGCAGAGGAAGTCTCAGCAGCAGAAGAAGTCTCAACAGCAGAGGAA  
GTCTCAAC

GGATAATGTCTGAAGCTCAAGAACTCACGTAGAGCAACTACCAGAATCTGTTGTGCGATGCCCCAGTCGAA  
GAACAGCACCAAGAACCACCACAGGCTCCAGATGCTCCACAAGAACCACAAGTTCCACAGGAATCTGCTCC  
ACAGGAAT

TGAAGCTCAAGAACTCACGTAGAGCAACTACCAGAATCTGTTGTGCGATGCCCCAGTCGAAGAACAGCACC  
AAGAACCACCACAGGCTCCAGATGCTCCACAAGAACCACAAGTTCCACAGGAATCTGCTCCACAGGAATCT  
GCTCCACA

GAAGAAGAAGTCTCAACAGCAGAAGTCTCAACAGCAGAAGAAATCTCAACAGCAGAGGAAGTCTCAACGGC  
AGAGGAAGTCTCAGCAGCAGAGGAAGTCTCAGCAGCAGAAGAAGTCTCAACAGCAGAGGAAGTCTCAACAG  
CAGAGGAA

AGAAGTCTCAACAGCAGAGGAAGTCTCAACAGCAGAGGAAGTCTCAACAGCAGAGGAAGTCTCAGCAGCAG  
AGGAAGTCTCAACAGCAGAAGAAGCCTCCACAATAGAGGCCTCAGTAGTGGAGGGAATTTCAATAGCAGAA  
ATACTAGA

CCCCAGTCGAAGAACAGCACCAAGAACCACCACAGGCTCCAGATGCTCCACAAGAACCACAAGTTCCACAG  
GAATCTGCTCCACAGGAATCTGCTCCACAAGAACCACCAGCTCCACAAGAACAAAATGACGTTCCCTCCACC  
ATCTAATG

GGCCATAGCTTTGTTTGGGGTCATCATGCCGTGCTGTTGGTACTGTCCATTCTGTGGAGGTGGTACTGAAG  
CAGGTTGAGGAGAGACATGATGATGGTTCTCTGGAACAGCTGATGTCCCAGGTGTTGTCTCTTGTGAGAA  
TTAACCTT

ACCAGAATCTGTTGTGCGATGCCCCAGTCGAAGAACAGCACCAAGAACCACCACAGGCTCCAGATGCTCCAC  
AAGAACCACAAGTTCCACAGGAATCTGCTCCACAGGAATCTGCTCCACAAGAACCACCAGCTCCACAAGAA  
CAAAATGA



TGGTCTCGATAGTAGAGGAAGAAGAAGTCTCAACAGCAGAAGTCTCAACAGCAGAAGAAATCTCAACA  
GCAGAGGAAGTCTCAACGGCAGAGGAAGTCTCAGCAGCAGAGGAAGTCTCAGCAGCAGAAGAAGTCTCAAC  
AGCAGAGG

GAAGGTAAGGACTTGAAGGAAATCCTATCTGGTTTTCCATAACGCTGGCCCTGTTGCTGGTGCTGGTGCTGC  
TTCTGGCGCTGCCGCTGCTGGTGGTGACGCTGCTGCTGAAGAAGAAAAAGAAGAAGAAGCTGCTGAAGAAT  
CTGACGAC

AAAACCATAAGGATAATGTCTGAAGCTCAAGAACTCACGTAGAGCAACTACCAGAATCTGTTGTGCTGATGC  
CCCAGTCGAAGAACAGCACCAAGAACCACCACAGGCTCCAGATGCTCCACAAGAACCACAAGTTCCACAGG  
AATCTGCT

ACCCACACCCACACACCACACACCACACCACACCACACCCACACCCACACCCACACCCACACCCACACACCA  
CACCCACACCCACACACCACACACTACCCCTAACACTACCCTATTCTAACCTGATTTTACCTGTCTCCAA  
ACCTACCC

AATGCTCATGAGTATTGGTAGGAGATGTGGTTTTCACTGGCATGACCATGTGTGTGAGTGACAGGGGAA  
GTGGTAGCACTGGAATGACCATGCGTGTGAGTAACAGGAGAAGTGGCAGCTTTGGAAGTGTGTGGTTATG  
AGTGGTTG

TAAACTCAAATTAAGAACTTAGAATAAGAAAGCGACACCGGCAGCGACGGCAGCACCCGAAGACACCAGC  
ACCCAAAGCGTTGGAAGCAGCAGCACCAAGTGGAGATCTTGGTGCTGGTGGTGGTGGTGGTGGTGGTGGT  
TGGACCA

TAGGGTAATGGAGGGTAATTTGAGAGACAGGTTGGTCAGGCTTGGCTTGTCTTAGTCTTAGGCTTAGGCTT  
CTCTCTGGTGTGGGTGTGTGGGTGTGTGGGTGTGGGTGTGGGTGTGGGTGTGGGTGTGGGTGTGGTGGTGGT  
GTGTGGTG

ATCACGTTCTCTAGAGTCTCTGTAAGCATCGGATGAAGGATCTCTTGCACCAGCACGACGAGAAGGTGGAA  
CATACTGCCCTGGGATGGAACCAGCTCCGCCAATTGGCCTGCCTTCTTTCACTGGCGGCCTCGACACCG  
CCTTCATT

GTCGGTATCGATCAATTCTTGTGAAGACTGGTACTTTGACCACCAGTGAAACTGCTCACAACATGAAGGT  
CATGAAATCTCTGTCTCTCCAGTTGTGCAAGTCGCTGTGCAAGTCAAGAACGCTAACGACTTACCAAAT  
TGGTCGAA

ATAATGTCTCTAAACTCAAATTAAGAACTTAGAATAAGAAAGCGACACCGGCAGCGACGGCAGCACCCGA  
AGACACCAGCACCCAAAGCGTTGGAAGCAGCAGCACCAAGTGGAGATCTTGGTGCTGGTGGTGGTGGTGGT  
TTGGTACG

GAAGAAATCATCGCTGAAGGTCAAAGAAGTTTCGCTACTGTTCCAACCTGGTGGTGCTTCTTCTGCTGCTGC  
CGGTGCTGCCGGTGTGCTGCTGCCGGTGGTGATGCTGCTGAAGAAGAAAAGGAAGAAGAAGCTAAGGAAGAAT  
CTGATGAT

AAAGCGACACCGGCAGCGACGGCAGCACCCGAAGACACCAGCACCCAAAGCGTTGGAAGCAGCAGCACCAAGT  
GGAGATCTTGGTGCTGGTGGTGGTGGTGGTGGTGGTGGTGGTGGTGGTGGTGGTGGTGGTGGTGGTGGTGGT  
GGACAGCG

GGAGATGTGGTTTTCACTGGCATGACCATGTGTGTGAGTGACAGGGGAAGTGGTAGCACTGGAATGACC  
ATGCGTGTGAGTAACAGGAGAAGTGGCAGCTTTGGAAGTGTGTGGTTATGAGTGGTTGCAATACTTGGAT  
GCCCTGCA

CCAGTTGAAGTTGCTGAAGCCGTTTTCACTACGGTGACTTCACCACCATGTTGACTGGTATTGCCCCAGA  
CCAAGTGACCAGAATGATACCCGGTGTTCATGGTACTCCAGCAGATTAAAGCCAGCCATCTCCAGTGCTC  
TATCCAAG

GCTACACTCCCTTAATAAAGTCAACATGAGCAGTAACAACAACACAAACACAGCACCTGCCAATGCAAATT  
CTAGCCACCACCACCACCATCACCACCATCACCACCACCATCACGGTCATGGCGGAAGCAACTCGACGCTA  
ACAATCC

GTAATAACAATGAAAGTGATGATGGCCTGACAATAGTTGAAGAGAGAACAACACGACCCAGAGTGACTG  
AACCTGCCAGGCGGGGAGAGGCTTGAGGTAAGTGCACGACAACAGACATACCGATAAGAAGGTCATTTGA  
ATTCCAAG

CTTGACCTTATGGACCTCTGATATTTCTGAATCTGGTCAAGAAGATCAACAACAACAACAACAACAGCAAC  
AGCAACAGCAACAACAGCAACAACAAGCTCCAGCTGAACAAACTCAAGGTGAACCAACCAATAAGAGCGC  
TGAGAAAT

CGGGTACTTGAATGATAATGGTAATAACAATGAAAGTGATGATGGCCTGACAATAGTTGAAGAGAGAACA  
CACGACCCAGAGTGACTGAACCTGCCAGGCGGGGAGAGGCTTGAGGTAAGTGCACGACAACAGACATA  
CCGATAAG

AGATAAGCTTTTAAACAGAAGTGGTCTCGATAGTAGAGGAAGAAGAAGTCTCAACAGCAGAAGTCTCAA  
CAGCAGAAGAAATCTCAACAGCAGAGGAAGTCTCAACGGCAGAGGAAGTCTCAGCAGCAGAGGAAGTCTCA  
GCAGCAGA

AGATTCTGAAATTACAGCCATAAGTACGAAGGAAGGACTACTGAGTGTACAAGGTATGACCTGTGGGTCTT  
GTGTTTCTACAGTCACCAAACAAGTGAAGGCATTGAGGGTGTGAATCGGTAGTCGTTTCCTTGGTAACG  
GAAGAGTG

GAGATGATTTTCGGTGGCGGAGCTTGAGACCCTGGTTGTAGTTGCTGCAGTTGCTGCACATGACTGGACTCC  
TCCTGTAAGTGTGCCTTTGCTGTTGAATCTGGTGTGCTTTAGCTGTTGCTGTTGTTCTCTCAAGGTTCT  
ATAATAGT

CACTACCACCAAAGAAACAGGTGTTACTACCAAACAAACCACAGCCAACCCAAGTCTAACCGTCTCCACAG  
TCGTCCCAGTTTCATCCTCTGCTTCTTCTCATTCCGTTGTCAACAGTAACGGTGCTAACGTGCTCGTT  
CCAGGTGC

CTAGAGTCTCTGTAAGCATCGGATGAAGGATCTCTTGCACCAGCAGCAGAGAAGGTGGAACATACTGCC  
TGGGATGGAACCAGCTCCGCCAACTTGGCCTGCCTTCTTTCACTGGCGGCCTCGACACCGCCTTCATTAG  
TGGCTGGG

TTGGAAGACACGCCACGGTGATCAATATAAAGCTACGGACACACTGATCCCAGGCCAGGATCTTTGGAA  
CTGGTCTACAAGCCATCCGACCCTACGACTGCTCAACCACAAACTTTGAAAGTGTATGACTACAAGGGCAG  
TGGTGTGG

AGTGGGGAGGTAGGGTAATGGAGGGTAATTTGAGAGACAGGTTGGTCAGGCTTGGCTTGTCTTAGTCTTAG  
GCTTAGGCTTCTCTCTGGTGTGGGTGTGTGGGTGTGTGGGTGTGGGTGTGGGTGTGGGTGTGGGTGT  
GGTGGGTG

GACGTTGAATATGTTTGTCTTTCAAGTAAGGTCAATAAACGCTGTCCAGCACCAGCTTCGCCACAGTCAG  
CACATCCTTGTCAATGTTCTTTGGCTGCACCGTTATGTTCTTACTTGTAAACATGACTATTATTACTC  
TTATTTGC

GGATGAAGGATCTCTTGCACCAGCAGCAGAGAAGGTGGAACATACTGCCCTGGGATGGAACCAGCTCCGC  
CAACTTGGCCTGCCTTCTTCACTGGCGGCCTCGACACCGCCTTCATTAGTGGCTGGGTCTTCTAATGCT  
GAAAGTTC

CCTTGGAGCAGAATTAATGTTAGAAATATTGGAAAGAGAAGATTGAGATGGAGATGATTTTCGGTGGCGGAG  
CTTGAGACCCTGGTTGTAGTTGCTGCAGTTGCTGCACATGACTGGACTCCTCCTGTAAGTGTGCCTTTGC  
TGTTGAAT

TGTAAGCATCGGATGAAGGATCTCTTGCACCAGCACGACGAGAAGGTGGAACATACTGCCCTGGGATGGAA  
CCAGCTCCGCCAACTTGGCCTGCCTTCTCTTCACTGGCGGCCTCGACACCGCCTTCATTAGTGGCTGGGTC  
TTCTAATG

CTTAATAAAGTCAACATGAGCAGTAACAACAACACAAACACAGCACCTGCCAATGCAAATTCTAGCCACCA  
CCACCACCATCACCACCATCACCACCACCATCACGGTCATGGCGGAAGCAACTCGACGCTAAACAATCCCA  
AGTCGTCC

GGGCTCTTTGGAAGAAATCATCGCTGAAGGTCAAAGAAGTTTCGCTACTGTTCCAACCTGGTGGTGCTTCTT  
CTGCTGCTGCCGGTGCTGCCGGTGCTGCTGCCGGTGGTGATGCTGCTGAAGAAGAAAAGGAAGAAGAAGCT  
AAGGAAGA

AGTCAAGTCCAGGCAGCTCAACTCCATAATATTGCCATTATCAGCTGCCACAAGTACTCTCTCTTGATCTT  
GCACGCTGCTTGTTCATTACAGCCACCCTGGGTGCTGAAAGTAGTGTCTTGCCACCATATTTGCTGTC  
ACGACATA

TGGCTTGTTCATCGTGAGTCATTTCTTCCAGCGTCGTAGTTGGCACCTCTTCTGGATGGTGGAAACCCATGAGG  
CAGACTTCCATGGTAGAACACCTTCTTCCACATGGTGTGACTTCTTCCAAAGTCAAACCTTAGTTTCT  
GGAACAAC

ATCAATTCTTGTGAAGACTGGTACTTTGACCACCAGTGAAACTGCTCACAACATGAAGGTCATGAAATTC  
TCTGTCTCTCCAGTTGTGCAAGTCGCTGTGCAAGTCAAGAACGCTAACGACTTACCAAATTTGGTCAAGG  
TTTGAAGA

TGTAAGAACCGACCATATCCTTAGTTTTCGTGATACTGCTGCTGCTGCTGCTGCTGTTGTTGTTGTTGCTGTTGC  
TGCTGTTGTTGCTGTTGCTGCTGAAGTTTCGTGATACCTCATTCTTTCCTGCAAAACTTGTGGTCTGTGA  
GAAGACCT

CTATTACCAAGACGTTGAATATGTTTGCTCTTTCAAGTAAGGTCAATAAACGCTGTCCAGCACCAGCTTCG  
CCACAGTCAGCACATCCTTGCTCAATGTTCTTTGGCTGCACCGTTATGTTTCCTTGACTTGTAAACATGACT  
ATTATTAC

AATCTAAGGGCACTACCACCAAAGAAACAGGTGTTACTACCAAACAAACCACAGCCAACCCAAGTCTAACCC  
GTCTCCACAGTCGTCAGTTTCATCCTCTGCTTCTTCTCATTCCGTTGTCATCAACAGTAACGGTGCTAA  
CGTCGTCG

TGAAAGTGATGATGGCCTGACAATAGTTGAAGAGAGAACAACACGACCCAGAGTGACACTGAACCTGCCAG  
GCGGGGAGAGGCTTGAGGTAACCTGCGACGACAACAGACATACCGATAAGAAGGTCATTTGAATTCCAAGAA  
GATCTAGG

TTTGCCAAGAAGCACGAAGCTAGACAAAGATTGGAATCCTACGTTGCCTCCATCGAACAAACTGTCACTGA  
CCCAGTCTTGTCTTCTAAATTGAAGAGAGGTTCCAAGTCCAAGATTGAAGCTGCTTTGTCCGATGCTTTGG  
CTGCTTTG

TACACATATCATCACGTTCTCTAGAGTCTCTGTAAGCATCGGATGAAGGATCTCTTGCACCAGCACGACGA  
GAAGGTGGAACATACTGCCCTGGGATGGAACCAGCTCCGCCAACTTGGCCTGCCTTCTCTTCACTGGCGGC  
CTCGACAC

CGGCAGCGACGGCAGCACCGAAGACACCAGCACCCAAAGCGTTGGAAGCAGCAGCACCAGTGGAGATCTTG  
GTGCTGGTGGTGTGGAACCGTTGGTACGGTTGGAACCATTGGTAGAAACGTTAGCAGCTTGGACAGCGGC  
AACAGTAG

CAAGGCCAGAACAAGATACAGGCGCCCCTATCAAATGTCTACTGGTGTACAAGCTCTCCATTAAGTCCA  
TCAGGCTCCACCCAGAACATTCCACCAAGGTCTTGAACAACGGCGAAGAGGAGTTCAATTTGTCACTACTG  
TGACGCTA

TCAAAATGTCTACTGGTGTCAACAAGCTCTCCATTAAGTCCATCAGGCTCCACCCCAGAACATTCCACCAAG  
GTCTTGAACAACGGCGAAGAGGAGTTCAATTTGTCACTACTGTGACGCTACTTTTCAGGATTAGAGGATATCT  
AACGAGAC

TGGACCAGTATTTCGCTTTAGAATGCTCATGAGTATTGGTAGGAGATGTGGTTTTTCACACTGGCATGACCAT  
GTGTGTGAGTGACAGGGGAAGTGGTAGCACTGGAATGACCATGCGTGTGAGTAACAGGAGAAGTGGCAGCT  
TTGGAAGT

CCGATCCTCAGCAAGTCCTGGAGACTTTAGGTTTACTTGTGGTGATGTCTCTCTCTTCCAAAGTGCTGGT  
ACGGTCGACCTGGATTCCAGAGGTCATGTCAAGAATAGTGAGAGCAGTTTGAAATCAAAGCTAGCATCTAA  
AGCTTATG

CTTCAGAGGGCGGCTTCAGAGGTGGCTTCAGAGGGCGGTTTTCTCCAGAGGGCGGCTTCGGTGGCCCCAGAGGTG  
GATTTGGTGGTCCAAGAGGTGGTTACGGTGGCTATTCCAGAGGTGGCTACGGTGGCTACTCCAGAGGGCGGA  
TATGGTGG

CGCCACGGTGATCAATATAAAGCTACGGACACACTGATCCCAGGCCAGGATCTTTGGAACTGGTCTACA  
AGCCATCCGACCCTACGACTGCTCAACCACAAACTTTGAAAGTGTATGACTACAAGGGCAGTGGTGTGGCC  
ATGGCCAT

AGAACAGCACCAAGAACCACCACAGGCTCCAGATGCTCCACAAGAACCACAAGTTCCACAGGAATCTGCTC  
CACAGGAATCTGCTCCACAAGAACCACCAGCTCCACAAGAACAAAATGACGTTCTCCACCATCTAATGCT  
CCAATTTA

GATCAAATCAGAGTCTTGTCAAGAGCTCAAGAAGTGCCACACGAGGGTGGGTTCTCGGACCTGCTTTGGTC  
AGACCCTGACAATGTAGAGGCTTGGCAAGTTTCCCCTCGTGGTGCAGGATGGCTCTTTGGCAGTAAAGTTG  
CTAGAGAG

ACTTGAAGGAAATCCTATCTGGTTTTCCATAACGCTGGCCCTGTTGCTGGTGCTGGTGCTGCTTCTGGCGCT  
GCCGCTGCTGGTGGTGACGCTGCTGCTGAAGAAGAAAAGAAGAAGCTGCTGAAGAATCTGACGACGA  
CATGGGTT

GGACCCAGTTTCAGTTCTAGTTTTACAAATAAATACACGAGCGATGTTCGGACTCAGAAGTCAATCAAGAAGC  
TAAGCCAGAGGTCAAGCCAGAAGTCAAGCCTGAGACTCACATCAATTTAAAGGTGTCCGATGGATCTTCAG  
AGATCTTC

CAACGAACAAGGTAACAGAGTCACCCCATCTTTGCTTGTCTTCACTCCAGAAGAAAGATTGATTGGTGATG  
CTGCCAAGAACCAAGCTGCTTTGAACCCAAGAAACTGTCTTCGATGCTAAGCGTTTGATTGGTAGAAGA  
TTTCGACGA

CCAGGATCAGGTCTTCCGTAGCGGTATCTAATGCTAACAACAGTCAGGCGAGAGCTAGGCAGCTATTGCAA  
GGACAGCAACAGCCTGGCGTGCAGCAGATTTCAACAACAACATCAACAGAATGAGAAGACTACAGCAAG  
CAAAGTTG

ATCTTGGACCTCACGATTTCCGGTATGAAGAGGTATATCCACTTCGCCAACAGACTAACTGGCTGGAACGC  
CATCAAAGCCAGAGTCGACCAGTTGAACTTGAACCTGACGGATGACCAAATCAAGGAAGTTACTGCTAAGA  
TTAAGAAG

CAGGGTAACGAGTGGGGAGGTAGGGTAATGGAGGGTAATTTGAGAGACAGGTTGGTCAGGCTTGGCTTGTG  
TTAGTCTTAGGCTTAGGCTTCTCTCTGGTGTGGGTGTGTGGGTGTGTGGGTGTGGGTGTGGGTGTG  
GTGTGGGT

ATGCTAACAACAGTCAGGCGAGAGCTAGGCAGCTATTGCAAGGACAGCAACAGCCTGGCGTGCAGCAGATT  
TCACAACAACAACATCAACAGAATGAGAAGACTACAGCAAGCAAAGTTGTTCTGACGGTGAACGATCTCAG  
TAGCGCTG



CGATTACCACTGAAAGTACCAACTCCAGCACTAATGCTACTACCACTGCCAGCACCAACGTCAGGACTAGT  
GCTACTACCACTGCCAGCATCAACGTCAGGACTAGTGCAGACTACCACTGAAAGTACCAACTCCAACACTAG  
TGCTACTA

ACCCCTTTTCCATACATTCAATGAAGTACGCTGTTAGTTTCGTCCAACCTTTGCTGCATCAACCTGCAATGAG  
GAGCAGATCTCAACCACTGCATCTTCCAATGCCTCAGCATTGACTTTATGTAAATTTTCAAATGACATTAC  
TGTGTATC

ACACACCACACACCACACCACACCACACCACACCACACCACACCACACCACACCACACCACACCACACCACACC  
CACACACCACACACTACCCCTAACACTACCCTATTCTAACCCCTGATTTTACCTGTCTCCAAACCTACCCTC  
ACATTACC

AAGAGCTCAAGAAGTGCCACACGAGGGTGGGTCTCGGACCTGCTTTGGTCAGACCCTGACAATGTAGAGG  
CTTGGCAAGTTTCCCCTCGTGGTGCAGGATGGCTCTTTGGCAGTAAAGTTGCTAGAGAGTTTAACCACGTT  
AATGGACT

CAGCACGACGAGAAGGTGGAACATACTGCCCTGGGATGGAACCAGCTCCGCCAACTTTGGCCTGCCTTCTCT  
TCACTGGCGGCCTCGACACCGCCTTCATTAGTGGCTGGGTCTTCTAATGCTGAAAGTTCACTTAAATTTGT  
CTTGAATG

CATCTGCTTCTTCCACCGATGTCACCTTCTCCTCTTCCATCTCCACTTCTCTGGCTCAGTAACTATCACA  
TCTTCTGAAGCTCCAGAATCCGACAACGGTACCAGCACAGCTGCACCAACTGAAACCTCAACAGAGGCTCC  
AACCACTG

TAAGTACGAAGGAAGGACTACTGAGTGTACAAGGTATGACCTGTGGGTCTTGTGTTTTCTACAGTCACAAA  
CAAGTGAAGGCATTGAGGGTGTGAATCGGTAGTCGTTTTCTTGGTAACGGAAGAGTGCCATGTTATTTA  
TGAACCGT

ATGCAATTATTAAGGGACAACCTTGACCTTATGGACCTCTGATATTTCTGAATCTGGTCAAGAAGATCAACA  
ACAACAACAACAACAGCAACAGCAACAGCAACAACAGCAACAACAAGCTCCAGCTGAACAACTCAAGGTG  
AACCAACC

GCGACACCTTGGGATGGCTCCGCTTGTTCGGTAGGCTCTGGCTTAGATTCTCCAGAACCCTCAGCAGGTGC  
TTCACCAGGCTCGACCTGAGCTAACTCCTCACCAACAGTGACAGTGTCTCTGGTTTTGAAATTTAGCTTCG  
TAACAGTA

TTTTCACACTGGCATGACCATGTGTGTGAGTGACAGGGGAAGTGGTAGCACTGGAATGACCATGCGTGTGA  
GTAACAGGAGAAGTGGCAGCTTTGGAAGTGCTGTGGTTATGAGTGGTTGCAATACTTGGATGCCCTGCATC  
ACCTTTGG

GGCTTCAGAGGTGGCTTCAGAGGCGGTTTTCTCCAGAGGCGGCTTCGGTGGCCCCAGAGGTGGATTTGGTGG  
TCCAAGAGGTGGTTACGGTGGCTATTCCAGAGGTGGCTACGGTGGCTACTCCAGAGGCGGATATGGTGGCT  
CCAGAGGT

CACACTGATCCCAGGCCAGGATCTTTGGAAGTGGTCTACAAGCCATCCGACCCTACGACTGCTCAACCAC  
AAACTTTGAAAGTGTATGACTACAAGGGCAGTGGTGTGGCCATGGCCATGTACAATACTGACGAATCCATC  
GAAGGGTT

AGCACGAAGCTAGACAAAGATTGGAATCCTACGTTGCCTCCATCGAACAACTGTCAGTACCAGTCTTG  
TCTTCTAAATTTGAAGAGAGGTTCCAAGTCCAAGATTGAAGCTGCTTTGTCCGATGCTTTGGCTGCTTTGCA  
AATCGAAG

GATACTGCTGCTGCTGCTGCTGTTGTTGTTGTTGCTGTTGCTGCTGTTGTTGCTGTTGCTGCTGAAGTTCC  
TGATACCTCATTCTTTCTGCAAAACTTGGTGGTCTGTGAGAAGACCTGCCTTAGTTGCATTTGAACCTTG  
TTTCAGAG

GGACAAGCCTATTACTATAGTCCTGAATACGGTTATGATGACGAGGATGGTGAAGAAGAGGACCAAGACGA  
AGATATGGTGGGTGACAGCGGCACTACAAGACAGGAAGATGGTGGCGAGGACAGCAACTCGAGAAGATATC  
CATCATAT

TCTGAGTAGGAGATAAGCTTTTAAACAGAAGTGGTCTCGATAGTAGAGGAAGAAGAAGTCTCAACAGCA  
GAAGTCTCAACAGCAGAAGAAATCTCAACAGCAGAGGAAGTCTCAACGGCAGAGGAAGTCTCAGCAGCAGA  
GGAAGTCT

GGCTCGAGATTACGAACAAAATGCAAAGTTTTCACTAGTCACTCACAGATCATTCTCTCACTCCTGTGT  
GAAGCCCAAATCTGCATGCTCTTTGGTCAAACCAGTTCATCACTTGGTGAAAATTGATAAGTCAAAGTTAT  
CCCCTAGA

ACGTCGAATCCAAATTGAGAGATGACTTGGAAGATTAAAGAAAATCAGAGCTCATCGTGGTATCAGACAC  
TTCTGGGGTTTGCCTGTTAGAGGTCAACACACCAAGACCCTGGTAGAAGAAGAGCTTAAACTGATAAGAT  
TATTCAAG

ATTACAGCCATAAGTACGAAGGAAGGACTACTGAGTGTACAAGGTATGACCTGTGGGTCTTGTGTTTTCTAC  
AGTCACCAACAAGTGAAGGCATTGAGGGTGTGAATCGGTAGTCGTTTTCTTGGTAACGGAAGAGTGCC  
ATGTTATT

TTATAAATACTTCGAGGATTTGCCACAGAGGTCAAGGATAAAGTCTGGTTTTCTCGAAGGAGTCACGCAGG  
TGCTGCCTCAAGATGTTGACGAATACAGTGGAGGTGGTGGTATGCATATGATGCTAGATTTCTCGGTGGC  
GGATTACC

TGAAGGCGAAGAATCCCACAGTGTCCAAGACTACCAAGAGGCCACCAGCACCACCAACCACCTGAACCCC  
AACCATATTATCCTCCTCCTCCTCCAGGTGAACACATGCACGGTCGCCACCAATGCACCACCGTCAAGAA  
GGAGAACT

TAAGGCTTTGGAAGGTAAGGACTTGAAGGAAATCCTATCTGGTTTTCCATAACGCTGGCCCTGTTGCTGGTG  
CTGGTGCTGCTTCTGGCGCTGCCGCTGCTGGTGGTGACGCTGCTGCTGAAGAAGAAAAAGAAGAAGT  
GCTGAAGA

CAGTCAGGCGAGAGCTAGGCAGCTATTGCAAGGACAGCAACAGCCTGGCGTGCAGCAGATTTCAACAAC  
AACATCAACAGAATGAGAAGACTACAGCAAGCAAAGTTGTTCTGACGGTGAACGATCTCAGTAGCGCTGTT  
GCTGAATA

TCCTGAATACGGTTATGATGACGAGGATGGTGAAGAAGAGGACCAAGACGAAGATATGGTGGGTGACAGCG  
GCACTACAAGACAGGAAGATGGTGGCGAGGACAGCAACTCGAGAAGATATCCATCATATTACCATTGTAAT  
ACTGCCAG

GGCATGACCATGTGTGTGAGTGACAGGGGAAGTGGTAGCACTGGAATGACCATGCGTGTGAGTAACAGGAG  
AAGTGGCAGCTTTGGAAGTGTGTGGTTATGAGTGGTTGCAATACTTGGATGCCCTGCATCACCTTTGGAA  
TGTCTATG

TAGCAATCTATGATCATAAGTCAAAGCCAAGTACATCATTGGTCTTGAGACAATTTGTCCATTAACAGTGA  
CAGGTCTCTCTTTGACACCATGCAAGCCTAGGACGGCTGTTTGTGGTGAATTGATGATAGGAGTACCGTAT  
AATGAACC

GCGGATCCAAATGATGAGGAAGTTATAACAGAAGTTGCTATGCTTACGATGCTGTAAACAGGACCAAAACA  
CGAGAAACATTTACTGTCAAGTTTGTCTCCAGAGGCAGGTCCCAAATCTTCCAGAGGGCTTTGATTGCAG  
CTTCAACG

CCAGGCCAGGATCTTTGGAAGTGGTCTACAAGCCATCCGACCCTACGACTGCTCAACCACAACTTTGAA  
AGTGTATGACTACAAGGGCAGTGGTGTGGCCATGGCCATGTACAATACTGACGAATCCATCGAAGGGTTTG  
CTCATTTCG

CTCACGATTTTCGGTATGAAGAGGTATATCCACTTCGCCAACAGACTAACTGGCTGGAACGCCATCAAAGCC  
AGAGTCGACCAGTTGAACTTGAACCTTGACGGATGACCAAATCAAGGAAGTTACTGCTAAGATTAAGAAGCT  
GGGTGATG

GAAAGAACTCTGATATGGATGTTGAAGATCGTCTCCAGGCCGTTGTCTTGACAGACTCTTATGAAACTAGG  
TTTATGCCACTGACAGCTGTCAAGCCAAGGTGTTTGCTGCCACTGGCTAACGTACCTCTCATTGAATACAC  
CTTAGAAT

CGTTTTCAACTACGGTGACTTCACCACCATGTTGACTGGTATTGCCCCAGACCAAGTGACCAGAATGATCA  
CCGGTGTTCCATGGTACTCCAGCAGATTAAGCCAGCCATCTCCAGTGCTCTATCCAAGGTCGGTATCTAC  
ACTATCGC

TTCCACCGATGTCACTTCCTCCTCTTCCATCTCCACTTCCTCTGGCTCAGTAACTATCACATCTTCTGAAG  
CTCCAGAATCCGACAACGGTACCAGCACAGCTGCACCAACTGAAACCTCAACAGAGGCTCCAACCACTGCT  
ATCCCAAC

AATGATAATGGTAATAACAATGAAAGTGATGATGGCCTGACAATAGTTGAAGAGAGAACAACACGACCCAG  
AGTGACACTGAACCTGCCAGGCGGGGAGAGGCTTGAGGTAACCTGCGACGACAACAGACATACCGATAAGAA  
GGTCATTT

AACACGACCTTCACCTTAGGCCAGGAACCTTACTGAATCTACGGTGAATCACACTAATCATTCTGATGATGA  
ACTCCCTGGACACCTCCTTCTCGATTGAGGAGCATCACGAACCCTTATAAGATCTGCTCATCACATACACT  
CAGCATCA

CAAACAACCTCAAGATCCGTTAGACATTTTCCAGCTTCCAAAACAGAAGAATGTGAGAAGGTTTTCACTCAGGC  
TAATTTCTCAACAGCCAACAACACCTCCCTCAGCTGCTGTTCCAGAGAACCATCATCATGCCTCTCCTCAAG  
CTGCTCAA

CCCGTGGTGGTTCCAGAGGCGGCTTCGGTGGTAGAGGCGGTTCTCGTGGTGGTGCCCGTGGTGGCTCCAGA  
GGTGGTAGAGGTGGCGCTGCTGGTGGTGCCCGTGGTGGTCCAAGGTCGTTATTGAACCACATAGACATGC  
CGGTGTTT

TGGACCTCTGATATTTCTGAATCTGGTCAAGAAGATCAACAACAACAACAACAACAGCAACAGCAACAGCA  
ACAACAGCAACAACAAGCTCCAGCTGAACAACTCAAGGTGAACCAACCAATAAGAGCGCTGAGAAATAC  
AAGGGGAA

TAGAATGCTCGATCAAATCAGAGTCTTGTCAAGAGCTCAAGAAGTGCCACACGAGGGTGGGTTCTCGGACC  
TGCTTTGGTCAGACCCTGACAATGTAGAGGCTTGGCAAGTTTCCCCTCGTGGTGCAGGATGGCTCTTTGGC  
AGTAAAGT

GGAGCTGGCGAGCTGGCTAGCTGTGGAGACTATTCCACCATGGTACACACTAGGATCCTCGATCTTGGTGA  
GCCATGAGTAGAATTTGTTTGGTTCCACCCCTCCGGTTGCCATGTTTATATCTTCCCTCAGCAAACCTGTTTA  
TCTTGCAT

TCGCTGAAGGTCAAAGAAGTTTCGCTACTGTTCCAACCTGGTGGTGCTTCTTCTGCTGCTGCCGGTGCTGCC  
GGTGCTGCTGCCGGTGGTGTGCTGCTGAAGAAGAAAAGGAAGAAGAAGCTAAGGAAGAATCTGATGATGA  
CATGGGTT

CATCCATCTTCACGTTCTGTGCAATTTCTTTAATTGTATCTTGAGGAGGACCAGTCGCAGTGTTGCCAGAG  
TACTTTCTACGATCTGCAGACTTCGAACTTGTGTCCGTGTAGACACTAGGGTCGACAGCGTTCATACCGGA  
ACTAACAT

GTGCTGTTGGTACTGTCCATTCTGTGGAGGTGGTACTGAAGCAGGTTGAGGAGAGACATGATGATGGTTCT  
CTGGAACAGCTGATGTCCAGGTGTTGTCTCTTGTGAGAATTAACCTTAGTGGAATCTCTATCAAATTC  
GGTAAATT

CACTTTGATCATGCAATTATTAAGGGACAACCTTGACCTTATGGACCTCTGATATTTCTGAATCTGGTCAAG  
AAGATCAACAACAACAACAACAACAGCAACAGCAACAGCAACAACAAGCTCCAGCTGAACAA  
ACTCAAGG

AGACATTTTCAGCTTCCAAAACAGAAGAATGTGAGAAGGTTTTCACTCAGGCTAATTCTCAACAGCCAACAA  
CACCTCCCTCAGCTGCTGTTCCAGAGAACCATCATCATGCCTCTCCTCAAGCTGCTCAAGTACCATTGCCA  
CAAAATGG

AGATGGTTGTTGGTAATGTGCCAGTTAGAGGCCATAGCTTTGTTTGGGGTCATCATGCCGTGCTGTTGGT  
ACTGTCCATTCTGTGGAGGTGGTACTGAAGCAGGTTGAGGAGAGACATGATGATGGTTCTCTGGAACAGCT  
GATGTCCC

AAGGGTTCATGCCAATCTTCAATGCATATCTCAGATAAACCAAGGAGTGCCCTCAGCGAAACCACTGATCC  
TCACGCCTCCTCAGCTAGCCAACCAGCAGCAACCTCCACAGGATATTCTTTCTAAACTCTATCTTCTCTTG  
GCAAGAGT

CGTCCACTCTCTCATTGTAATTGTTTAGCACAATTTTCGTTCTCCCTGACAGAGTCCTTGTACAGCGCCAGG  
TCTCCCGAATCAATGTTCTCCAAGTCGTGCTGTCGTGAGCTTCAAGACGGTCGTGAGCACCTCCAACCT  
AGCTATGT

TACGAATATTCCAGGATCAGGTCTTCCGTAGCGGTATCTAATGCTAACAACAGTCAGGCGAGAGCTAGGCA  
GCTATTGCAAGGACAGCAACAGCCTGGCGTGCAGCAGATTTCAACAACAACATCAACAGAATGAGAAGA  
CTACAGCA

GAGTCTTGTCAAGAGCTCAAGAAGTGCCACACGAGGGTGGGTTCTCGGACCTGCTTTGGTCAGACCCTGAC  
AATGTAGAGGCTTGGCAAGTTTCCCCTCGTGGTGCAGGATGGCTCTTTGGCAGTAAAGTTGCTAGAGAGTT  
TAACCACG

GTCTTCCGTAGCGGTATCTAATGCTAACAACAGTCAGGCGAGAGCTAGGCAGCTATTGCAAGGACAGCAAC  
AGCCTGGCGTGCAGCAGATTTCAACAACAACATCAACAGAATGAGAAGACTACAGCAAGCAAAGTTGTT  
CTGACGGT

CCAATCATTATTGGAAGACACGCCACGGTGATCAATATAAAGCTACGGACACACTGATCCCAGGCCAGG  
ATCTTTGGAAGTGGTCTACAAGCCATCCGACCCTACGACTGCTCAACCACAACTTTGAAAGTGTATGACT  
ACAAGGGC

CCAGTTACCGAATCTAAGGGCACTACCACCAAAGAAACAGGTGTTACTACCAAACAAACCACAGCCAACCC  
AAGTCTAACCGTCTCCACAGTCGTCCCAGTTTCATCCTCTGCTTCTTCTCATTCCGTTGTCATCAACAGTA  
ACGGTGCT

CGCTGAATTAGAGTTTTGTGTGTAAGAACCGACCATATCCTTAGTTTTCGTGATACTGCTGCTGCTGCTGCT  
GTTGTTGTTGTTGCTGTTGCTGCTGTTGTTGCTGTTGCTGCTGAAAGTTCGTGATACCTCATTCTTTCTGCT  
AAAATTG

TCCTCCGTTGAAATTATTGCCAACGAACAAGGTAACAGAGTACCCCCATCTTTTCGTTGCTTTCACTCCAGA  
AGAAAGATTGATTGGTGATGCTGCCAAGAACAAGCTGCTTTGAACCCAAGAAACACTGTCTTCGATGCTA  
AGCGTTTG

AAGATCCGTTAGACATTTTCAGCTTCCAAAACAGAAGAATGTGAGAAGGTTTTCACTCAGGCTAATTCTCAA  
CAGCCAACAACACCTCCCTCAGCTGCTGTTCCAGAGAACCATCATCATGCCTCTCCTCAAGCTGCTCAAGT  
ACCATTGC

GAGTTTTGTGTGTAAGAACCGACCATATCCTTAGTTTTCGTGATACTGCTGCTGCTGCTGCTGTTGTTGTTG  
TTGCTGTTGCTGCTGTTGTTGCTGTTGCTGCTGAAAGTTCGTGATACCTCATTCTTTCTGCAAAACTTGT  
GGTCTGT

ATTACTATAGTCCTGAATACGGTTATGATGACGAGGATGGTGAAGAAGAGGACCAAGACGAAGATATGGTG  
GGTGACAGCGGCACTACAAGACAGGAAGATGGTGGCGAGGACAGCAACTCGAGAAGATATCCATCATATTA  
CCATTGTA

CCGCTAATGTTATCTTAGGTTTGTGTCTGTCATTTATGCTTTCTTTCTGTGGTGTACACAACCTGTCTCA  
TTGATGCCTGGCTTCTGGACATTCATGTGGAAGGCTTCCCCATACACATATTTTGTTCAGAATCTGGTCGG  
AATTATGC

TTCTCAACAAGAGACAACACCTGGGACATCAGCTGTTCCAGAGAACCATCATCATGTCTCTCCTCAACCTG  
CTTCAGTACCACCTCCACAGAATGGACAGTACCAACAGCACGGCATGATGACCCCAAACAAGCTATGGCC  
TCTAACTG

TCCAACAGTACATCTGCTTCTTCCACCGATGTCACTTCCCTCCTTCCATCTCCACTTCCCTCTGGCTCAGT  
AACTATCACATCTTCTGAAGCTCCAGAATCCGACAACGGTACCAGCACAGCTGCACCAACTGAAACCTCAA  
CAGAGGCT

AATCCCATTGGTTGTCTCCACTGACTTGGAACTATTCAAAGACCAAGGAAGCTGTTGCTGCTTTGAAGG  
CTGTTGGTGTCTCACTCCGACTTGTGGAAGGCTTGAAGTCCAAGAAATTGAGAGCCGGTAAGGGTAAGTAC  
AGAAACAG

ACAAGATACAGGCGCCCCTATCAAATGTCTACTGGTGTACAAGCTCTCCATTAAGTCCATCAGGCTCCA  
CCCCAGAACATTCCACCAAGGTCTTGAACAACGGCGAAGAGGAGTTCAATTTGTCACTACTGTGACGCTACT  
TTCAGGAT

AGATACTAAGAGATTCTGAAATTACAGCCATAAGTACGAAGGAAGGACTACTGAGTGTACAAGGTATGACC  
TGTGGGTCTTGTGTTTCTACAGTCACCAAACAAGTGAAGGCATTGAGGGTGTGAAATCGGTAGTCGTTTC  
CTTGTTAA

CAAGAACCACCACAGGCTCCAGATGCTCCACAAGAACCACAAGTTCACAGGAATCTGCTCCACAGGAATC  
TGCTCCACAAGAACCACCAGCTCCACAAGAACAAAATGACGTTCCCTCCACCATCTAATGCTCCAATTTATG  
AAGGCGAA

TTGCTTTTGAATGCTCATGAGTATTGGTAGGAGATGTGGTTTTTCACTGGCATGACCATGTGTGTGAGT  
GACAGGGGAAGTGGTAGCACTGGAATGACCATGCGTGTGAGTAACAGGAGAAGTGGCAGCTTTGGAAGTGC  
TGTGGTTA

ACACGAGTAGTGAACATCCTCTCTTCCCTCATAAACATTATATTCATGTTCTGTGGAGGTGCATGCAATCTC  
ATCACATGTCGCCGTGGCTGTCGTGACTGGAATATTGTGACCGATAGTATTAGAAGAATTGTTGTTATGCT  
TGTTATCA

GTCTTCTGTCCCAGTTACCGAATCTAAGGGCACTACCACCAAAGAAACAGGTGTTACTACCAAACAAACCA  
CAGCCAACCCAAGTCTAACCGTCTCCACAGTCGTCCCAGTTTCATCCTCTGCTTCTTCTCATTCCGTTGTC  
ATCAACAG

GCCACCATACCATCTGGTCACTATTACCAAGACGTTGAATATGTTTGTCTTTCAAGTAAGGTCAATAAAC  
GCTGTCCAGCACCAGCTTCGCCACAGTCAGCACATCCTTGCTCAATGTTCTTTGGCTGCACCGTTATGTTT  
CTTGACTT

ATGTTTGTCTTTTCAAGTAAGGTCAATAAACGCTGTCCAGCACCAGCTTCGCCACAGTCAGCACATCCTTG  
CTCAATGTTCTTTGGCTGCACCGTTATGTTTCTTGACTTGTTAACATGACTATTATTACTCTTATTTGCTT  
TATTGCC

TCTTGTACAATGGCTTGTTCATCGTGAGTCATTTCTTCCAGCGTCGTAGTTGGCACCTCTTCTGGATGGTGA  
ACCCATGAGGCAGACTTCCATGGTAGAACACCTTCTTCCACATGGTGTGACTTCTTCAAAGTCAAAC  
CTTAGTTT

GTGGCTTCAGAGGCGGTTTTCTCCAGAGGCGGCTTCGGTGGCCCCAGAGGTGGATTTGGTGGTCCAAGAGGT  
GGTTACGGTGGCTATTCCAGAGGTGGCTACGGTGGCTACTCCAGAGGCGGATATGGTGGCTCCAGAGGTGG  
TTACGATA

TTCTTATATTTCCAGCTAGGGAGCCATCACGCCTTGTTTTGAGCAACAAGAAGAAGAGACCGATGAAGTTAT  
GAGCACCATTTCCAGGAATCCACATCACTCTTTGAGTGTCAAGTCATCATTGGTGATACTTCTAGGTACAA  
CTGTGATC

TCTCTTGACCAGCACGACGAGAAGGTGGAACATACTGCCCTGGGATGGAACCAGCTCCGCCAACTTGGCC  
TGCCTTCTCTTCACTGGCGGCCTCGACACCGCCTTCATTAGTGGCTGGGTCTTCTAATGCTGAAAGTTAC  
TTAAAATT

TGGTAATGTGCCAGTTAGAGGCCATAGCTTTGTTTTGGGGTCATCATGCCGTGCTGTTGGTACTGTCCATT  
CTGTGGAGGTGGTACTGAAGCAGGTTGAGGAGAGACATGATGATGGTTCTCTGGAACAGCTGATGTCCAG  
GTGTTGTC

GCAACTAGGACAGCAGGCAGTTTTAGAATTCTTGATCCAAATGGCTGTTTTCAACTTCCTGTGCTGGAGAGGT  
AATTTTCGCCTTGCTCAACTTCTTCAGGTAACCTTCTCCACATCCAAATCTTCGTCACCCAAATCCCAGG  
CACCTTCG

GGGTGATATTTAAGGAAGAAATCCACCCTTCTTTAAGGTTTTCCACTGCACATGTTGAAATGTGTCTGAATC  
TTGATGAGCCCAAAGGCGTGCCACCATAACCATCTGGTCACTATTACCAAGACGTTGAATATGTTTGCTCTT  
TCAAGTAA

TACGGTGACTTCACCACCATGTTGACTGGTATTGCCCCAGACCAAGTGACCAGAATGATCACCGGTGTTCC  
ATGGTACTCCAGCAGATTAAGCCAGCCATCTCCAGTGTCTATCCAAGGTCGGTATCTACACTATCGCAA  
ACTAGAGA

TAACGACAAGGTCTTAAACCATTTCTATCCAATATAGCACCACAGTAACGTCCATCAGTGAAAGTTAACAA  
AGCTGGACCATCCCAAGGTTCCATCAGACATGCAGCCCAGTCGTACCATGCTTTTTAGGTGAGAATCCATAT  
CCTTATGA

TGGAAGGTAAGGGCTCTTTGGAAGAAATCATCGCTGAAGGTCAAAGAAGTTTCGCTACTGTTCCAACCTGGT  
GGTGTCTTCTTCTGCTGCTGCCGGTGCTGCCGGTGCTGCTGCCGGTGGTGATGCTGCTGAAGAAGAAAAGGA  
AGAAGAAG

CATATCAGAGTCCGCTGAGGATGAATCAGTAAATGTATTACCTGACTCAGGTGATGGAGTGCTCAGAGGGC  
TTCCAACCTGATGATGGATACTGCGGAAACTGTGATTGTGGCCCAGGTGGAAAGTACATAGGCGACATTTGA  
TAAGGTGT

CCGGTAACATTATCGGTTTTAGTCGGTATCGATCAATTCTTGTTGAAGACTGGTACTTTGACCACCAGTGAA  
ACTGCTCACAACATGAAGGTCATGAAATTTCTGTCTCTCCAGTTGTGCAAGTCGCTGTGCAAGTCAAGAA  
CGCTAACG

AATGGCTTATCATCGTGAGCCATTTCTTCAGCGTCGTAGTTGGCACCTCTTCTAGATGGTGGAAACCCATGA  
GGCAGACTTCCATGGTAGAACACCTTCTTCCACATGGTGTGACTTCTTCAAAGTCAAACCTTAGTTT  
CTGGAACA

CTCCCAGATTAGAATGCTCGATCAAATCAGAGTCTTGTCAAGAGCTCAAGAAGTGCCACACGAGGGTGGG  
TTCTCGGACCTGCTTTGGTCAGACCCTGACAATGTAGAGGCTTGGCAAGTTTCCCCTCGTGGTGCAGGATG  
GCTCTTTG

TTAGTTTTCGTGATACTGCTGCTGCTGCTGCTGTTGTTGTTGTTGCTGTTGCTGCTGTTGTTGCTGTTGCTG  
CTGAAGTTTCGTGATACCTCATTCTTTCTGCAAAACTTGTGGTCTGTGAGAAGACCTGCCTTAGTTGCA  
TTTGAAC

CTGCTCGGATCAAGGCCAGAACAAGATACAGGCGCCCCTATCAAAATGTCTACTGGTGTCAACAAGCTCTCC  
ATTAAGTCCATCAGGCTCCACCCAGAACATTCCACCAAGGTCTTGAACAACGGCGAAGAGGAGTTCATTT  
GTCACTAC

CCAATTTACCGGAATTTGATAGAGATTCCACTAAGGTTAATTCTCAACAAGAGACAACACCTGGGACATCA  
GCTGTTCCAGAGAACCATCATCATGTCTCTCCTCAACCTGCTTCAGTACCACCTCCACAGAATGGACAGTA  
CCAACAGC

TCTCCTTCATGGTACCGTAACGGTAGGCGTTGGTTCCTGAACAAGAATTAGCAATGCAACCACCAATCTGT  
GCACCTGGACCAGGGTACAGCCAAACATCAAACCGTGGTGCCTCAAATAGTCATTCAAATCCTCCCAGGG  
TAGACCGG

AAAGAAACAGGTGTTACTACCAAACAACCACAGCCAACCCAAGTCTAACCGTCTCCACAGTCGTCCCAGT  
TTCATCCTCTGCTTCTTCTCATTCCGTTGTCATCAACAGTAACGGTGCTAACGTCGTCGTTCCAGGTGCTT  
TAGGTTTG

AAGCTACGGACACACTGATCCCAGGCCAGGATCTTTGGAAGTGGTCTACAAGCCATCCGACCCTACGACT  
GCTCAACCACAACTTTGAAAGTGTATGACTACAAGGGCAGTGGTGTGGCCATGGCCATGTACAATACTGA  
CGAATCCA

AACTTGCATAATCTTCAAAGTACACATATCATCACGTTCTCTAGAGTCTCTGTAAGCATCGGATGAAGGAT  
CTCTTGACACCAGCACGACGAGAAGGTGGAACATACTGCCCTGGGATGGAACCAGCTCCGCCAACTTGGCCT  
GCCTTCTC

TACTGGTGTCAACAAGCTCTCCATTAAGTCCATCAGGCTCCACCCAGAACATTCCACCAAGGTCTTGAACA  
ACGGCGAAGAGGAGTTCATTTGTCACTACTGTGACGCTACTTTTCAGGATTAGAGGATATCTAACGAGACAT  
ATTAAGAA

CACGTTCTGTGCAATTTCTTTAATTGTATCTTGAGGAGGACCAGTCGCAGTGTTGCCAGAGTACTTTCTAC  
GATCTGCAGACTTCGAACTTGTGTCCGTGTAGACACTAGGGTGCACAGCGTTCATACCGGAACTAACATTA  
CTCTTTGG

GTAACAGCTTCTCTACCATCTAGCAATCTATGATCATAAGTCAAAGCCAAGTACATCATTGGTCTTGAGAC  
AATTTGTCCATTAACAGTGACAGGTCTCTCTTTGACACCATGCAAGCCTAGGACGGCTGTTTGTGGTGAAT  
TGATGATA

CTACTACCACCGAAAGTACCGACTCCAACACTAGTGCTACTACCCTGCTAGCACCAACTCCAGCACTAAT  
GCCACTACCCTGCTAGCACCAACTCCAGCACTAATGCCACTACCCTGAAAGTACCAACGCTAGTGCCAA  
GGAGGACG

GCGGTATCTAATGCTAACAACAGTCAGGCGAGAGCTAGGCAGCTATTGCAAGGACAGCAACAGCCTGGCGT  
GCAGCAGATTTCAACAACAACATCAACAGAATGAGAAGACTACAGCAAGCAAAGTTGTTCTGACGGTGA  
ACGATCTC

CTTTGAAGAGGGCTCGAGATTCACGAACAAAATGCAAAGGTTTTCACTAGTCACTCACAGATCATTCTCTC  
ACTCCTGTGTGAAGCCAAATCTGCATGCTCTTTGGTCAAACAGTTCATCACTTGGTGAAAATTGATAAG  
TCAAAGTT

CACAGGCTCCAGATGCTCCACAAGAACCACAAGTTCACAGGAATCTGCTCCACAGGAATCTGCTCCACAA  
GAACCACCAGCTCCACAAGAACAATAATGACGTTCTCCACCATCTAATGCTCCAATTTATGAAGGCGAAGA  
ATCCCACA

GTGACTTTATCCTTGGAGCAGAATTAATGTTAGAAATATTGGAAAGAGAAGATTGAGATGGAGATGATTTT  
GGTGGCGGAGCTTGAGACCCTGGTTGTAGTTGCTGCAGTTGCTGCACATGACTGGACTCCTCCTGTAAGT  
CTGCCTTT

GTGTTACTACCAAACAAACCACAGCCAACCCAAGTCTAACCGTCTCCACAGTCGTCCAGTTTTATCCTCT  
GCTTCTTCTCATTCCGTTGTCATCAACAGTAACGGTGCTAACGTCGTCGTTCCAGGTGCTTTAGGTTTGGC  
TGGTGTGG

TGTGTGTGAGTGACAGGGGAAGTGGTAGCACTGGAATGACCATGCGTGTGAGTAACAGGAGAAGTGGCAGC  
TTTGGAAGTGCTGTGGTTATGAGTGGTTGCAATACTTGGATGCCCTGCATCACCTTTGGAATGTCTATGCC  
CAGTGGGG

TAAAGAAGTCCAAACAACCTCAAGATCCGTTAGACATTTTCCAGCTTCCAAAACAGAAGAATGTGAGAAGTTTT  
TCACTCAGGCTAATTTCTCAACAGCCAACAACACCTCCCTCAGCTGCTGTTCCAGAGAACCATCATCATGCC  
TCTCCTCA

ATTAACATAATTCATCACCATTCCAAATACTTTTCAATTTATTTTATCCTTTTTCTAGTAGCAAAAGTGACTTGC  
CAGCGTCCTTCTGAGGTGGCATTCTGCTGGAACCTGGTGTGGTGGTTACGTTTGATAAATCATGTTGTGAG  
ATGCTATT

CTTCTAGAAGACTTGGATGCTAGTGTAATTTCTTTTAGGTTGACCATTACTTTGAGTATCACGCTCCCCAGC  
AGCAGCAGCTTCTTCATCCTGCTCAGACATTTGTCCTTCATCAGTGCTATTATCTGAATCACGTACGTTAT  
TCATCATA

ATATCAGAGTCCGCTGAGGATGAATCAGTAAATGTATTACCTGACTCAGGTGATGGAGTGCTCAGAGGCGT  
TCCAACCTGATGATGGATACTGCGGAAACTGTGATTGTGGCCAGGTGGAAAGTACATAGGCGACATTTGAT  
AAGGTGTA

GCCTCCAAAGTTTTGATCCAAATGAAGTTAAGTACTTGTACTTGAGAGCTGTCGGTGGTGAAGTCGGTGCTT  
CCGCCGCCTTGGCTCCAAAGATCGGTCCATTGGGTTTTATCCCCAAAGAAGGTTGGTGAAGATATCGCCAAG  
GCCACCAA

CCAGGAACCTTACTGAATCTACGGTGAATCACACTAATCATTCTGATGATGAACTCCCTGGACACCTCCTTC  
TCGATTCAGGAGCATCACGAACCTTTATAAGATCTGCTCATCACATACACTCAGCATCATCTAATCCTGAC  
ATAAACGT

AGTTCCCTAAGGGAACCTTCTGACTATCAAGCGAAGTGGTACTTGGATGACGTCATTGACGCAATGAGGAAG  
AAGAGGCAGAACAGACCAATGGAAAGGATGAGACAATGATGGAAATTGATGATGAAATGATGGTGGAGCAA  
GACAATGA

CTAGAATAGAGGTTCTTAGCGAACAAATAACCGAATAGAGTAGCTGAAGAGGCGATGACAGAGTATTTTAA  
CCACTGGCTGCTGCTGTCGGTGTGCCTGTGCCTGTTGAGGCGTATCTGTAGCATGATCTTCTCACCAGCC  
TTCCTCTA

CAAATTGAGAGATGACTTGGAAAGATTAAGAAAATCAGAGCTCATCGTGGTATCAGACACTTCTGGGGTT  
TGCGTGTAGAGGTCAACACACCAAGACCACTGGTAGAAGAAGAGCTTAAACTGATAAGATTATTCAAGCT  
TAATCTTT

ATGGCGCCACCTCTGTAGATTAGATGCCGATGCACAATTAGCGGAGAGGTTGCAAAGGGAAGCTTACCA  
ACAACAACAGCCTGACCAAGATTATGTCAGGCCACCTGATGAGGCAAGACATGAAGTACTTACTGAAACTT  
CAGGATTC

ATCTTCAAAGTACACATATCATCACGTTCTCTAGAGTCTCTGTAAGCATCGGATGAAGGATCTCTTGCACC  
AGCAGCAGAGAAGGTGGAACATACTGCCCTGGGATGGAACCAGCTCCGCCAACTTGGCCTGCCTTCTCTT  
CACTGGCG

TATTGTTATCATATGAATTATGATAATATCCGGAGTTGTTTCTGGAGTGAGTTCTACTTCTGCTGCCACCT  
GCACTCATACCAGGTGAATTACCGTTTTGAGTTGTAATGAGGGTGAGGCGGTTGAGGCGTGAATGATTGTT  
AGAGCCAG



CACTGCTGTGGGTACGGCCATTCTGTGGAGGTGGTACTGAAGCAGGTTGAGGAGAGGCATGATGGGGGTT  
CTCTGGAACAGCTGATGAAGCAGGTGTTGTTGTCTGTTGAGAGTTAGCCTTAGTGGAAGCCTTCTCACATT  
CTTCTGTT

AAAATTGGTGGTCTCGACAACCTAACCAACCATTGGCGGTACTTTGGAAGTTGTTGGTAACTTCACCTCCTT  
GAACCTAGACTCTTTGAAGTCTGTCAAGGGTGGCGCAGATGTCAATCAAAGTCAAGCAATTTCTCCTGTA  
ATGCTTTG

GGTACCGTAACGGTAGGCGTTGGTTCCTGAACAAGAATTAGCAATGCAACCACCAATCTGTGCACCTGGAC  
CAGGGTCACAGCCAAACATCAAACCGTGGTGCCTCAAATAGTCATTCAAATCCTCCCAGGGTAGACCGGCC  
TGCACGGT

GACCATATCCTTAGTTTTCGTGATACTGCTGCTGCTGCTGCTGTTGTTGTTGTTGCTGTTGCTGCTGTTGTT  
GCTGTTGCTGCTGAAGTTCGTGATACCTCATTCTTTCTGCAAAACTTGTGGTCTGTGAGAAGACCTGC  
CTTAGTTG

AATGCGACTACCAACTCCAGCACTAATGCTACTACCACTGCCAGCACCAACGTCAGGACTAGTGCTACTAC  
CACTGCCAGCATCAACGTCAGGACTAGTGCGATTACCACTGAAAGTACCAACTCCAGCACTAATGCTACTA  
CCAATGCC

CTGAGTGTACAAGGTATGACCTGTGGGTCTTGTGTTTTCTACAGTCACCAAACAAGTGAAGGCATTGAGGG  
TGTTGAATCGGTAGTCGTTTTCTTGGTAACGGAAGAGTGCCATGTTATTTATGAACCGTCCAAGACAACGC  
TAGAAACC

AAGCCCCTGAGTCTTCTGTCCCAGTTACCGAATCTAAGGGCACTACCACCAAAGAAACAGGTGTTACTACC  
AAACAAACCACAGCCAAACCAAGTCTAACCGTCTCCACAGTCGTCCCAGTTTCATCCTCTGCTTCTTCTCA  
TTCCGTTG

TCTTTGGGCAAGGACACCGGCGTTGATTTTCATCAGCCTGTTTGAGTACCCATGGATCCTCTGGTGAAACCT  
TGTTGATCTTGGCGATGGAGACACAGGCCTCTTCATGTCTCTCACATTCAATCAGATATCTTGGGGACTCT  
GGAATAA

GGCAACCATGGAAAGAACTCTGATATGGATGTTGAAGATCGTCTCCAGGCCGTTGTCTTGACAGACTCTTA  
TGAAACTAGGTTTTATGCCACTGACAGCTGTCAAGCCAAGGTGTTTGCTGCCACTGGCTAACGTACCTCTCA  
TTGAATAC

CTTTGGAAGCCTGTCATAAAGGTTGGGGTCAATCTATTATCATTGGTGTGGCTGCCGCTGGTGAAGAAATT  
TCTACAAGGCCGTTCCAGCTGGTCACTGGTAGAGTGTGGAAGGCTCTGCTTTTGGTGGCATCAAAGGTAG  
ATCTGAAA

CGGTATGAAGAGGTATATCCACTTCGCCAACAGACTAACTGGCTGGAACGCCATCAAAGCCAGAGTCGACC  
AGTTGAACTTGAACCTTGACGGATGACCAAATCAAGGAAGTTACTGCTAAGATTAAGAAGCTGGGTGATGTC  
AGATCGCT

GGTCACGTTGACTTCTCCTCTGAAGTTACTGCCGCTTTACGTGTCACTGACGGTGCTTTGGTTGTCTCGA  
CACCATTGAAGGTGTCTGTGTCAAACCGAAACTGTTTTGAGACAAGCTTTGGGTGAGAGAATCAAGCCTG  
TTGTTGTT

CAGGACGATAGAGGTAGCACAATGGCGGTAGCGCCACGCCTACCAGGATCAACAAGTCTACTAGAGTGCAG  
GGGTACTCAACAGTGTGATCTGGATGAGCGACAGCTTCTCTTCTCCGACGATGCGGAACATCTTGT  
GAAGATTT

ATGGAACAGGATCTACTTCTGGTTCTTGTTCAGCCTTTGCTCCCTCATCTGTCAATTTCCACGTCTTCACCT  
TCTACTTTCACTTCTTTTTCAGCTTCGTGTTGTCTGTGAGCTTCGATAGAATCCTTGATAGCGTATTTAGC  
AGCCCTCT

ATTCTCAAGAAGAGACAACACCTGGGACATCAGCTGTTCCAGAGAACCATCATCATGTCTCTCCTCAACCT  
GCTTCAGTACCACCTCCACAGAATGGACAGTACCAACAGCACGGCATGATGACCCCAAACAAAGCTATGGC  
CTCTAACT

CAGTGGCTGATGGACCAGTATTTCGCTTTAGAATGCTCATGAGTATTGGTAGGAGATGTGGTTTTACACTG  
GCATGACCATGTGTGTGAGTGACAGGGGAAGTGGTAGCACTGGAATGACCATGCGTGTGAGTAACAGGAGA  
AGTGGCAG

GTGTCACTGACGGTGCTTTGGTTGTCGTCGACACCATTGAAGGTGTCTGTGTCCAAACCGAAACTGTTTTG  
AGACAAGCTTTGGGTGAGAGAATCAAGCCTGTTGTTGTTATCAACAAGGTGACAGAGCTTTGTTGGAATT  
GCAAGTTT

TAGTCAATATGCCTCCAAAGTTTGATCCAAATGAAGTTAAGTACTTGTACTTGAGAGCTGTGGTGGTGAA  
GTCGGTGCTTCCGCCGCCTTGGCTCCAAAGATCGGTCCATTGGGTTTATCCCAAAGAAGGTTGGTGAAGA  
TATCGCCA

CAGAAGAATGTGAGAAGGTTTTCACTCAGGCTAATTCTCAACAGCCAACAACACCTCCCTCAGCTGCTGTT  
CCAGAGAACCATCATCATGCCTCTCCTCAAGCTGCTCAAGTACCATTGCCACAAAATGGGCCGTACCCACA  
GCAGCGAA

GACCCAAAGGAACCGGATTAGCGAACTGGTGCAGGAGTATACTTTGCACAGTTTCTTCCCTCCCATCCCCT  
CTGTCTAGTGCATTGAGCAAATCTCTGCGCCTGTAGGTGGAGGATCCTAGAGTAATGAAGTCTCTGTGCGA  
GTATATCT

GAATGTCTAGCGAAGATAAGAAACCTGTCGTCGACAAGAAGGAAGAGGCTGCTCCAAAGCCACCATCCTCT  
GCTGTCTTCTCCATGTTTGGTGGTAAGAAGGCCGAAAAGCCAGAAACCAAGAAAGACGAAGAAGATACCAA  
GGAGGAAA

ACCGGATCAGATACACTATTGTGGTGTAACTGGACCTTGACTGTCTAAACAACCTCCTCTTGTGGTGTGAG  
CAGCTCTTCTTCCGAGAGACCTGACTTCTTGAACCTTGAATCCCTAGTTTCTTTACCTTCTGGGAACCTT  
TAAAATTC

TACTTACGAATCCTCCGTTGAAATTATTGCCAACGAACAAGGTAACAGAGTCACCCCATCTTTCGTTGCTT  
TCACTCCAGAAGAAAGATTGATTGGTGTGCTGCCAAGAACCAAGCTGCTTGAACCCAAGAAACACTGTC  
TTCGATGC

TGTGTAGTTGCAGTGGCTGATGGACCAGTATTTCGCTTTAGAATGCTCATGAGTATTGGTAGGAGATGTGGT  
TTTTCACTGGCATGACCATGTGTGTGAGTGACAGGGGAAGTGGTAGCACTGGAATGACCATGCGTGTGAG  
TAACAGGA

TGGAGAGGTAGGAGAGTATGTTGGGGAAGTTGGAGAAAAGCCTGGTGAGGAGACTCCAAATCCGGGAGATG  
TAGGTGCTTACCATAAGCACCAATGGAGACGTGGCTTACCATAATCAGCACCACCGTACGCTGTAAT  
CCTCCAGC

CATCTGGTCACTATTACCAAGACGTTGAATATGTTTGTCTTTCAAGTAAGGTCAATAAACGCTGTCCAGC  
ACCAGCTTCGCCACAGTCAGCACATCCTTGTCAATGTTCTTTGGCTGCACCGTTATGTTCTTACTTGT  
TAACATGA

CATCAACGTGAGGACTAGTGCGATTACCACTGAAAGTACCAACTCCAGCACTAATGCTACTACCACTGCCA  
GCACCAACGTGAGGACTAGTGCTACTACCACTGCCAGCATCAACGTGAGGACTAGTGCGACTACCACTGAA  
AGTACCAA

GAGGTAGCACAATGGCGGTAGCGCCACGCCTACCAGGATCAACAAGTCTACTAGAGTGCAGGGGTTACTCAA  
CAGTGTGATCTGGATGAGCGACAGCTTCTTCTTCCGAGCGATGCGGAACATCTTGTGGAAGATTTGC  
TTGATTCC

TTTAGGTGCAATGAGAATTATGAGATCATATTATAAACTACTTCGAGGATTTGCCACAGAGGTCAAGGATA  
AAGTCTGGTTTTCTCGAAGGAGTCACGCAGGTGCTGCCTCAAGATGTTGACGAATACAGTGGAGGTGGTGGT  
ATGCATAT

GAATCCCACAGTGTCCAAGACTACCAAGAGGCCACCAGCACCACCAACCACCTGAACCCCAACCATATTA  
TCCTCCTCCTCCTCCAGGTGAACACATGCACGGTCGCCACCAATGCACCACCGTCAAGAAGGAGAACTCT  
CGAACACC

AACAAGTTTTGCTACACTCCCTTAATAAAGTCAACATGAGCAGTAACAACAACACAAACACAGCACCTGCC  
AATGCAAATTCTAGCCACCACCACCACCATCACCACCATCACCACCACCATCACGGTCATGGCGGAAGCAA  
CTCGACGC

TGAACCAGCAGCTCTAGCTTCTTCAACACTAGCTTCAATAACTTCCAACCTTTGTTGAATGAATGGATGGT  
CTGGGGCAACCTTGTAACTTTGGAAAGAGATGCTCTTGCTTCGTCAATTTGACCAGCTTCAACCAAATAA  
CGTGGGGA

GCCGCTTTACGTGTCACTGACGGTGCTTTGGTTGTCGTCGACACCATTGAAGGTGTCTGTGTCCAAACCGA  
AACTGTTTTGAGACAAGCTTTGGGTGAGAGAATCAAGCCTGTTGTTGTTATCAACAAGGTGACAGAGCTT  
TGTTGGAA

AGGCAGCTCAACTCCATAATATTGCCATTATCAGCTGCCACAAGTACTCTCTCTTGATCTTGCACGCTGCT  
TGTTTCAATTACAGCCACCCTGGGTGCTGAAAGTAGTGTCTTGCCACCATATTTGCTGCACGACATACA  
CTACCGGT

TTGGATCTGCTGAAGTAGCCACGTCACTTGAGCTAGTTGGATCTGTTGATGTGGTTACCTCGTCAGAGCTT  
CTTGTACGATACATACCAGCAACACTTGATGAGGCATGTGGACCAACTGTTGTAGTAGACTCAATTAAGA  
TGTAGAGT

AAGGCCTTGTTGAAGGTTGTTATGAGAAAGTTCTTGCCAGCTGCCGATGCCTTATTGGAAATGATTGTCTT  
GCACCTGGCCATCTCCAGTCACTGCTCAAGCCTACAGAGCTGAACAATTATACGAAGGTCCAGCTGACGATG  
CCAACCTGT

CCGAATAGAGTAGCTGAAGAGGCGATGACAGAGTATTTTTAACCACTGGCTGCTGCTGTGCGGTGCTGCCTGT  
GCCTGTTGAGGCGTATCTGTAGCATGATCTTCTCACCAGCCTTCTCTAGGTTGTGCAATAGGCTTTATTA  
GCCTTG TG

CGACACCATTGACCAACGGTAGAGTTCAGCCTACGATGGTAGATTTGACCAAGGAGTGGTTCTTGATGGT  
GGAGTTGCACAAAACAACAGATCTGGTGATTCTAACACCATCACCGATGGTGACATTAGGACCGATAACCA  
CGTCTGGG

TACCGACTCCAACACTAGTGCTACTACCACCGAAAAGTACCGACTCCAACACTAGTGCTACTACCACTGCTA  
GCACCAACTCCAGCACTAATGCCACTACCCTGCTAGCACCAACTCCAGCACTAATGCCACTACCCTGAA  
AGTACCAA

TCGTGAGTCATTTCTTCAGCGTCGTAGTTGGCACCTCTTCTGGATGGTGAACCCATGAGGCAGACTTCCA  
TGGTAGAACACCTTCTTCCACATGGTGTTGACTTCTTCCAAAGTCAAACCTTAGTTTTCTGGAACAATA  
ACAAAACA

TGTTTTCATCACAAGTAAGTGATTTTTCTAAAGAGTCAATTAACCGTCTGGAGTGGCCACCAGGATGTCACA  
ACCCTCCGATAGAGAAAATGAAATTTCTTCCAAGGAGTGTCCACCAACAATAGAAATTACTTTGCAGTCAT  
AGTTGCTC

TCACCACCATGTTGACTGGTATTGCCCCAGACCAAGTGACCAGAATGATCACCGGTGTTCCATGGTACTCC  
AGCAGATTAAAGCCAGCCATCTCCAGTGCTCTATCCAAGGTCGGTATCTACACTATCGCAAACCTAGAGACA  
AACGCCAA

ATAAAGAGTATTTTCGAAACAAACACGACAATTACACTTGCAAGTCAGTAGAGAAAACCCAGTACAGAGCAAG  
CAAAGATGATCTCTGATGAACAGCTGAACTCCTTGGCCATCACCTTCGGTATTGTGATGATGACTTTAAT  
TGTCATTT

AGGACACCGGCGTTGATTTTCATCAGCCTGTTTGAGTACCCATGGATCCTCTGGTGAAACCTTGTTGATCTT  
GGCGATGGAGACACAGGCCTCTTCATGTCTCTCACATTCAATCAGATATCTTGGGGACTCTGGAACATAA  
ACATGCCA

GATCTTTGGAAGTGGTCTACAAGCCATCCGACCCTACGACTGCTCAACCACAACTTTGAAAGTGTATGAC  
TACAAGGGCAGTGGTGTGGCCATGGCCATGTACAATACTGACGAATCCATCGAAGGGTTTGCTCATTTCGTC  
TTTCAAGC

TATGTCACCGAACCTTCCATCCGCTAATGTTATCTTAGGTTTGTGTCTGTCATTTATGCTTTCTTTCTGTG  
GTGTTACACAACCTGTCTCATTGATGCCTGGCTTCTGGACATTCATGTGGAAGGCTTCCCCATACACATAT  
TTTGTTC

AAATCGTCAATAAAGTCCTTGTTGAACTTTGCATCATTACTCCTTGCCTTCGGAACGTGAGGTGGAAGACT  
CCACACTGCAACAGCATCGAAAGTATTAACCTTCGGAGATCTCACCATAAGGTGAATCCAGGAATGGCGATA  
TGATATCG

ATAAAAGACCAGATACCTTTTACAAGTGACATCATCGTCCTTGTCTCCTTGGAGAGAACAGAGCACATTAT  
AAGCAGTCATCAAGTCACTTGGCGTCAAAGCAGATCTCTGGTCTTTAAACTCGCTTGTCACTAGGAGACTA  
TGTTCAGG

ACAATGGAATCGCTGAATTAGAGTTTTGTGTGTAAGAACCGACCATATCCTTAGTTTTCGTGATACTGCTGC  
TGCTGCTGCTGTTGTTGTTGTTGCTGTTGCTGCTGTTGTTGCTGTTGCTGCTGAAGTTCGTGATACCTCAT  
TCTTTCT

CTTGGAAGGTAAGGCCTTGTTGAAGGTTGTTATGAGAAAGTTCTTGCCAGCTGCCGATGCCTTATTGGAAA  
TGATTGTCTTGCACTTGCCATCTCCAGTCACTGCTCAAGCCTACAGAGCTGAACAATTATACGAAGGTCCA  
GCTGACGA

CGAAGATAAGAAACCTGTGCTCGACAAGAAGGAAGAGGCTGCTCCAAAGCCACCATCCTCTGCTGTCTTCT  
CCATGTTTTGGTGGTAAGAAGGCCGAAAAGCCAGAAACCAAGAAAGACGAAGAAGATACCAAGGAGGAAACC  
AAGAAGGA

TGCTCCAAGTCTTCTGCAAAGTGAATTGTTCAATCATCAAATTTGTCAACTCACTTTGGGAACGTCTGTG  
TGCAACATGAATCTGCTTTGGGGCGTTTTTACCACCTCCTGTGGTTTGCACAAACATGTTATTTGGCTCTT  
GGGATCTA

AAATGTTCTGCTGTGGAGGATACCCCTGCTGCGATGGCATTTCGCGGTGGAGGATACGCCTGTTGTTGCTG  
ATGCGAAGGAGGAACCATGAATTGTGGATGATGTTGCTGCGGAGGAATAGCAAATTTGTTGCTGAGATGGTA  
ATTGTTGC

CTACTACTGAAGCTCCAACCACCGGTCTTCCAACCAACGGTACCCTTCCAGCTTTCCACCAACTACATCT  
TTGCCACCAAGCAACTACCACCTCCTCCTTACAACCATCTACTGACTACCCACTGACTACACTGT  
AGTCACTG

GATGGAGGACCATTGCTTTATAGTCAATTTTGGTATCATCACCCAATGTGTTCTCTCCCACTGCTTTTCAGT  
CTGCGGAGGGACTCATCTTGGTAAGACCTTCAGTCAGACTTGTGCCTATAAATTCAGCGGCTTCTTCTGT  
AGTCAATG

TATGAGAAAGTTCTTGCCAGCTGCCGATGCCTTATTGGAAATGATTGTCTTGCCTTGCATCTCCAGTCA  
CTGCTCAAGCCTACAGAGCTGAACAATTATACGAAGGTCCAGCTGACGATGCCAACTGTATTGCTATCAAG  
AACTGTGA

AACTATCAAGAGCCATCATTGACTGTGGTTTTGAACATCCTTCTGAGGTCCAGCAACATAACCATTCTCAG  
TCAATTCATGGTACCGATGTCTTGTGTCAAGCAAAGTCTGGTTTAGGTAAGACAGCTGTCTTTGTCTTATC  
CACTCTGC

TTAAAGACCTTCAATCTTTATATGATAAGATGAACGGCGGACCAGTGTGGTCCTCATTGAGTGAGTGCTTA  
TCTCAATTTGAAAAGAGTCAAGCCATCAACACTTCAGCCACAATCTTACTTCCGTTGATCGAATCACTTAT  
GGTTGTAT

ACCAGTACCAAAGATAACAACCAATGACAGGCTCGCTAATCTCACCAGCACTCGATGGACGAGAGCCTGAAG  
TGTAGCAGTGGGATAGGAAAGTGCCAACCGTGTCTGGTCAAAGCTACCACATTAATCATAGAGAGCCCC  
TGAATGTC

ATTGGCTCCAGGTGCTCACTTGGGTAGATTTCGTTATCTGGACCGAAGCTGCTTTCACCAAGTTGGACCAAG  
TCTGGGGTTCCGAAACCGTTGCCTCCTCCAAGGTCGGTTACACTTTGCCATCCCACATCATCTCCACTTCT  
GATGTCAC

TTGCTATTGTTATTGTTATCATATGAATTATGATAATATCCGGAGTTGTTTCTGGAGTGAGTTCTACTTCT  
GCTGCCACCTGCACCTCATACCAGGTGAATTACCGTTTGGATTGTAATGAGGGTGAGGCGGTTGAGGCGTGA  
AATGATTG

GTGTCCAAGACTACCAAGAGGCCACCAGCACCACCAACCCTGAACCCCAACCATATTATCCTCCTCCT  
CCTCCAGGTGAACACATGCACGGTCGCCACCAATGCACCACCGTCAAGAAGGAGAACTCTCGAACACCAG  
ATTGTTTTG

TGTTTCGCAAATTTTGGTGCTGAACATTCTCTTGTACAATGGCTTGTTCATCGTGAGTCATTTCTTCAGCG  
TCGTAGTTGGCACCTCTTCTGGATGGTGGAAACCCATGAGGCAGACTTCCATGGTAGAACACCTTCTTCCCA  
CATGGTGT

GGTGCTCACTTGGGTAGATTTCGTTATCTGGACCGAAGCTGCTTTCACCAAGTTGGACCAAGTCTGGGGTTC  
CGAAACCGTTGCCTCCTCCAAGGTCGGTTACACTTTGCCATCCCACATCATCTCCACTTCTGATGTCACCA  
GAATTATC

TGCTGTTCCATAAACGTACATATATGACATCTACAAAACCTACAGAGAAGGATATCATTCTGGGTCTGAATC  
AGGGTTTTGCCACACGCAAGCCATGCCCCAGAGAATAGCTGAGGTCTACCACATCAGAGTTCGTTGTGGAGA  
CAGAGTCC

ACAGCAGAGGAAGTCTCAACAGCAGAGGAAGTCTCAACAGCAGAGGAAGTCTCAGCAGCAGAGGAAGTCTC  
AACAGCAGAAGAAGCCTCCACAATAGAGGCCTCAGTAGTGGAGGGAATTTCAATAGCAGAAATACTAGAAG  
TTGCAACG

GTTCTAAAGGCCTTGTTCCACAGACCTTACTTCCACGTTAGTGTTCATCGAAGATGTTGCTGGTATCTCCAT  
CTGTGGTGCTTTGAAGAAGCTTGTGCTTGGTTAGGTTGTGGTTTTCGTTCGAAGGTCTAGGCTGGGGTAAACAACG  
CTTCTGCT

TAGGACAGAAGGACCCAGTTCAGTTCAGTTTTTACAAATAAATACACGAGCGATGTCGGACTCAGAAGTCA  
ATCAAGAAGCTAAGCCAGAGGTCAAGCCAGAAGTCAAGCCTGAGACTCACATCAATTTAAAGGTGTCCGAT  
GGATCTTC

GGCCACCTGATTTTCAGGAGTGGTGAGGAAATCCCAAAACATGTCAGCATCCCTTAGGTTGGTTTTGTGGGT  
TTCTCTTCTGTGTGTGGATAAAGTGAAGGAACTTGAAGGGTCTCTGATAAAGAATACCGGTGTATTATTG  
TAGACCCA

TTTACTGTGAGATACTAAGAGATTCTGAAATTACAGCCATAAGTACGAAGGAAGGACTACTGAGTGTACA  
AGGTATGACCTGTGGGTCTTGTGTTTTCTACAGTCCAAACAAGTGAAGGCATTGAGGGTGTGAATCGG  
TAGTCGTT

ACAGAGCTACTTAGATCAGCTGAACTTGAAGTACTACGGAAGTAGTTGGATCAGCTGAAGTAGTTTGAAC  
GGTCGAGGTAGTTGGGTGAGCTGAAGTAGTTGGGTCAACTGAAGTAGTTGGATCAACTGAAGTAGAACTGA  
CTATAGAA

AACTCCAGCACTAATGCTACTACCACTGCCAGCACCAACGTCAGGACTAGTGCTACTACCACTGCCAGCAT  
CAACGTCAGGACTAGTGGGACTACCACTGAAAGTACCAACTCCAACACTAGTGCTACTACCACCGAAAGTA  
CCGACTCC

GGTAAGCGACTAAACCCCTTAGCAATAGCTTGTCTGATGGCGTAGACTTGAGAAACATGACCACCACAGTG  
ACTCTAACTCTGATATCGATGTTGGAGAAGTTGTCCAAACCAACCAACAATAATGGTTTCGTAGACCTTGAA  
TCTTAGGA

CCATAGTCACGTATAACTGTCCTAATTCCAATATGCTTGTCTCCTGTTTCATTTCTACGCTTGTTCATCCACA  
CTGGCACCAGGACGCGCTGCTCTGTGAGCTGTCTTTATCCAGCAGGCTCAAATAGACTTGTTCGCTC  
ATTATACT

GCTTCTGCAAAGTGAATTGTTCAATCATCAAATTTGTCAACTCACTTTGGGAACGCTGTGTGCAACATGA  
ATCTGCTTTGGGGCGTTTTTACCACCTCCTGTGGTTTGCACAAACATGTTATTTGGCTCTTGGGATCTATT  
GTTGTTAA

AAATTATTGCCAACGAACAAGGTAACAGAGTCAACCCATCTTTTCGTTGCTTTCACTCCAGAAGAAAGATTG  
ATTGGTGATGCTGCCAAGAACCAAGCTGCTTTGAACCAAGAAACACTGTCTTCGATGCTAAGCGTTTGAT  
TGGTAGAA

CGTTATCTGGACCGAAGCTGCTTTACCAAGTTGGACCAAGTCTGGGGTTCGAAACCGTTGCCTCCTCCA  
AGGTCGGTTACACTTTGCCATCCACATCATCTCCACTTCTGATGTCACCAGAATTATCAACTCTTCTGAA  
ATCCAATC

ACCACCAACCACCTGAACCCCAACCATATTATCCTCCTCCTCCTCCAGGTGAACACATGCACGGTCGCCCA  
CCAATGCACCACCGTCAAGAAGGAGAAGTCTCGAACACCAGATTGTTTGTAGACCTTTCCATTGGACGT  
TCAAGAAT

GTCTCGACAACCTAACAAACCATTTGGCGGTACTTTGGAAGTTGTTGGTAACCTCACCTCCTTGAACCTAGAC  
TCTTTGAAGTCTGTCAAGGGTGGCGCAGATGTGAATCAAAGTCAAGCAATTTCTCCTGTAATGCTTTGAA  
AGCTTTGC

GACAGGTATTGAGGCGTTTCGAGAAGCATTGCTGGTAATTCCAAAGACTTTGGTGAAGAAGTCAAGATTG  
ACCCATTGGACGTGCTCGCAATGGTGGAGGACGAGTTGGATGACGCTCAGGATTCTGACGAAACGAGATAT  
GTTGGTGT

GAAGTGGTACTTGGATGACGTCATTGACGCAAATGAGGAAGAAGAGGCAGAACAGACCAATGGAAAGGATG  
AGACAATGATGGAAATTGATGATGAAATGATGGTGGAGCAAGACAATGAAGAGGTAGCAGGCGACGAAGAA  
TATGACAT

GCACCTGCTGCAATATCCTCAACGTACACGCTTTCACCATCGGCACCTGTTGCAGTATCCTCGACGTACAC  
GTCTTCACCATCGGCTCTTGTTCCTGTCTACTTCCACATCCTCTCCATATGATATTGTTTACTCTC  
CATCAACT

TTGTCCTCTTTGGAAGGTAAGGGCTCTTTGGAAGAAATCATCGCTGAAGGTCAAAGAAGTTTCGCTACTGT  
TCCAACTGGTGGTCTTCTTCTGCTGCTGCCGGTGTGCTGCCGGTGTGCTGCCGGTGGTGTGCTGCTGAAG  
AAGAAAAG

GCCCACCAGCACCACCAACCACCTGAACCCCAACCATATTATCCTCCTCCTCCTCCAGGTGAACACATGCA  
CGGTGCCCCACCAATGCACCACCGTCAAGAAGGAGAAGTCTCGAACACCAGATTGTTTGTAGACCTTTCC  
CATTGGAC

TAGCTTCTCGAACAGATGAGAGTACAATAACAGGAAGTGCAGACGGATGCAGAAAACAGGTGATGATGATGAT  
GATGATGATGATGACGATGATGAAGATGAGGATGACGAAGATGAGCCCCCTTATTGAAGTACACACGAAT  
TAGTCAAC

CTCTACCATCTAGCAATCTATGATCATAAGTCAAAGCCAAGTACATCATTGGTCTTGAGACAATTTGTCCA  
TTAACAGTGACAGGTCTCTCTTTGACACCATGCAAGCCTAGGACGGCTGTTTGTGGTGAATTGATGATAGG  
AGTACCGT

GATACATTTCCCTTCATTGCTGTTCTCGTTCTGAAGTTATGTGAGTTTGTAGAAGAAGGGACAGAAGTCTGCT  
TCTTTGAAGTTGAACAAGCTGAACATCATCAACACGTTTCGCCATTGAAAGAAGTAGGTACATTAACGTTTC  
TTGGTTGT

CTAGTGCTACTACCACTGCTAGCACCAACTCCAGCACTAATGCCACTACCACTGCTAGCACCAACTCCAGC  
ACTAATGCCACTACCACTGAAAGTACCAACGCTAGTGCCAAGGAGGACGCCAATAAAGATGGCAATGCTGA  
GGATAATA

TCCTTTGCACCCATAGTCACGTATAACTGTCCTAATTCCAATATGCTTGTCTCCTGTTTCATTTCTACGCTT  
GTCATCCACACTGGCACCAGGACGGCGCTGCTCTGTGAGCTGTCTTTATCCAGCAGGCTCAAATAGACTT  
GTTCTGCC

TTAGATCAGCTGAACTTGAAGTACTACGGAAGTAGTTGGATCAGCTGAAAGTAGTTTGAACGGTTCGAGGTA  
GTTGGGTGAGCTGAAGTAGTTGGGTCAACTGAAGTAGTTGGATCAACTGAAGTAGAACTGACTATAGAAGT  
AGTTGGGT

AAATGGCTATGCCACCGCTACTGGTGTGGTGGCGCTGCTGCCACTGCCACAGCGTCATCAACACATGCAG  
CAGCAGCAGCAGCCGCTGCTGCCAACCATTCCACCCAGGAGTGGGTTTTCGATTACGAAGGCCTGATAGAT  
TCCGAAGT

AGATTTCTTGCTAAAGCCAGAAGTATCAAGAGCCATCATTGACTGTGGTTTTGAACATCCTTCTGAGGTCC  
AGCAACATACCATTCCCTCAGTCAATTCATGGTACCGATGTCTTGTGTCAAGCAAAGTCTGGTTTTAGGTAAG  
ACAGCTGT

AATGGCGGTAGCGCCAGCCTACCAGGATCAACAAGTCTACTAGAGTGCAGGGTACTCAACAGTGTGAT  
CTGGATGAGCGACAGCTTCTCTTCTCCGCAGCGATGCGGAACATCTTGTGTTGAAGATTTGCTTGATTCCGG  
TAGCAGTG

CTAAAGCCAGAAGTATCAAGAGCCATCATTGACTGTGGTTTTGAACATCCTTCTGAGGTCCAGCAACATAC  
CATTCCCTCAGTCAATTCATGGTACCGATGTCTTGTGTCAAGCAAAGTCTGGTTTTAGGTAAGACAGCTGTCT  
TTGTCTTA

TAGAGATTCCACTAAGGTTAATTCTCAAGAAGAGACAACACCTGGGACATCAGCTGTTCCAGAGAACCATC  
ATCATGTCTCTCCTCAACCTGCTTCAGTACCACCTCCACAGAATGGACAGTACCAACAGCACGGCATGATG  
ACCCAAA

CAGAAGTCCACTATATGACTTTGAAGGTGCCAAATGGGGAAGGCCTGGAACGGACAAGTATCTGTGTCA  
CGATGATGGTATGATGATGTTGTTGTTGCTGGTCCCCTGGGCTGTCTAGCGAGTGCCTAGATTTAATAGC  
ACCCAGTG

TTTGATCCAAATGAAGTTAAGTACTTGTACTTGGAGAGCTGTGGTGGTGAAGTGGTGTCTTCCGCCGCTT  
GGCTCCAAAGATCGGTCCATTGGGTTTTATCCCCAAAGAAGGTTGGTGAAGATATCGCCAAGGCCACCAAGG  
AATTCAAA

TTGGATGACGTCATTGACGCAAATGAGGAAGAAGAGGCAGAACAGACCAATGGAAAGGATGAGACAATGAT  
GGAAATTTGATGATGAAATGATGGTGGAGCAAGACAATGAAGAGGTAGCAGGCGACGAAGAATATGACATAG  
AGGATAAT

GTCATCATGCACTGCTGTGGGTACGGCCATTCTGTGGAGGTGGTACTGAAGCAGGTTGAGGAGAGGCATG  
ATGGGGGTTCTCTGGAACAGCTGATGAAGCAGGTGTTGTTGTCTGTTGAGAGTTAGCCTTAGTGGAAGCCT  
TATCATAT

TACCACTGCCAGCACCAACGTGAGGACTAGTGCTACTACCACTGCCAGCATCAACGTGAGGACTAGTGCGA  
CTACCACTGAAAGTACCAACTCCAACACTAGTGCTACTACCACCGAAAGTACCGACTCCAACACTAGTGCT  
ACTACCAC

TGTAAATTTGCCTGCACTATCAGTAGGAGGCTCGATATCAAGAGGGTCTTGTAGTCCAGAGCCACGTTT  
TCAAGACCTACAGGTGAGTCTCTAAGTTTCGTGTGGAAAGCGCTACCTCCTTCATCAACAAGACACGTTT  
ATCCATAT

GCAAGTCTGGAGACTTTAGGTTTACTTGTGGTGATGTCTCTCTCTTCCAAAGTGTGGTACGGTCGACC  
TGGATTCCAGAGGTCATGTCAAGAATAGTGAGAGCAGTTTCAAATCAAAGCTAGCATCTAAAGCTTATGTT  
ATGAAAAG

CTGCTGCTGCTGTTGTTGTTGTTGCTGTTGCTGCTGTTGTTGCTGTTGCTGCTGAAGTTCGTGATACCTCA  
TTCTTTTCTGCAAAACTTGTGGTCTGTGAGAAGACCTGCCTTAGTTGCATTTGAACTTGTTCAGAGCA  
TTGAGAGT

TGATGTTGGCGAGTACGATGGTGATGTTGGTGAGTACGATGGTGATGTTGGTGAGTACGCTGGAGAGGTAG  
GAGAGTATGTTGGGAAGTTGGAGAAAAGCCTGGTGAGGAGACTCCAATCCGGGAGATGTAGGTGCTTCA  
CCATAAGC

CGGAATTTGATAGAGATTCCACTAAGGTTAATTCTCAAGAAGAGACAACACCTGGGACATCAGCTGTTCCA  
GAGAACCATCATCATGTCTCTCTCAACCTGCTTCAGTACCACCTCCACAGAATGGACAGTACCAACAGCA  
CGGCATGA

GGAATTTGATAGAGATTCCACTAAGGTTAATTCTCAACAAGAGACAACACCTGGGACATCAGCTGTTCCAG  
AGAACCATCATCATGTCTCTCTCAACCTGCTTCAGTACCACCTCCACAGAATGGACAGTACCAACAGCAC  
GGCATGAT

TGGGTAGATTGTTATCTGGACCGAAGCTGCTTTCACCAAGTTGGACCAAGTCTGGGGTTCCGAAACCGTT  
GCCTCCTCCAAGGTGCGTTACACTTTGCCATCCCACATCATCTCCACTTCTGATGTCACCAGAATTATCAA  
CTCTTCTG

CAATCGCTCCGTATATGTGCAAGTATCATTCTCCAAAGATAAAAAGCTGTGATAGCGGTACAGGACGGAGCT  
GCTGTGGCTTCCGCAAAACAGTCAAGTCCAGGCAGCTCAACTCCATAATATTGCCATTATCAGCTGCCACA  
AGTACTCT

AAACAGTGACCGTATGTCCGGCACGGTTCAACATATCAGCACACGCTAAACCTGCTGGACCAGAACCAATG  
ACACCCACTGTAAAGCCAGTGCCTGACTTTGGTGGACAAGGCTTAATCCATCCTTCTTGAAGCATTGTG  
AATGATAA

CGGTGCAGTGCAGGACGATAGAGGTAGCACAAATGGCGGTAGCGCCACGCCTACCAGGATCAACAAGTCTAC  
TAGAGTGCAGGGTACTCAACAGTGTGATCTGGATGAGCGACAGCTTCTCTTCTCCGCAGCGATGCGGA  
ACATCTTG

TATCGGTTTGTAGTCGGTATCGATCAATTCTTGTGGAAGACTGGTACTTTGACCACCAGTGAAACTGCTCACA  
ACATGAAGGTCATGAAATTCTCTGTCTCTCCAGTTGTGCAAGTCGCTGTGCAAGTCAAGAACGCTAACGAC  
TTACCAA

ACTGAATCTACGGTGAATCACACTAATCATTCTGATGATGAACTCCCTGGACACCTCCTTCTCGATTTCAGG  
AGCATCACGAACCTTATAAGATCTGCTCATCACATACACTCAGCATCATCTAATCCTGACATAAACGTAG  
TTGATGCT



GAGGAATGCTTGCTAATCCAGGAGCTGGCGAGCTGGCTAGCTGTGGAGACTATTCCACCATGGTACACACT  
AGGATCCTCGATCTTGGTGAGCCATGAGTAGAACTTGTTTGGTTCCACCCCTCCGGTTGCCATGTTTATAT  
CTTCCTCA

TTAATACTGGGGTTGTGACTGACCAGGTGGCATCGCCATGAAATGTTCTGCTGTGGAGGATACCCCTGCT  
GCGATGGCATTGCGGTGGAGGATACGCCTGTTGTTGCTGATGCGAAGGAGGAACCATGAATTGTGGATGA  
TGTTGCTG

AACACCTACGGTGGTCTGGGGTCGCTGGGCACTCCAATAGTGAGAACAGACGCTGCAGCCATATGGGCCAC  
GGGACAGACGTGGTGGCAGATCCCACCAGTGGCTCAGGTTGAGTTGAAAGGTCAATTGCCTCAGGGTGTTT  
CCGGAAAA

CAGTTCTAGTTTTTACAAATAAATACACGAGCGATGTCGGACTCAGAAGTCAATCAAGAAGCTAAGCCAGAG  
GTCAAGCCAGAAGTCAAGCCTGAGACTCACATCAATTTAAAGGTGTCCGATGGATCTTCAGAGATCTTCTT  
CAAGATCA

CACCATCATAAATAATATTACCGAAAATGACACCTGTGTGAGCAGAGGAACTTTGACAGTAACAGTGAAT  
TTGTGGAAGCCATGAGGAATCACGTTGGTCTTCTGTGGTGTGTCAATAATCTTCAAATCACCAAGAGTTGC  
AAATTGCA

AAACTCCCTACACAATACGTTATACTCACATTAATATCCAGCCTGCAGAAAGTGCCACCAAGATTGAATC  
AACCACAATAGCATTTGTCAAGGAACTGCCTTGGGATCTACACACCATTGTACCTGTTTCAATGGTGCTA  
TCATTGTG

CCCCTAGTTCTCTTTGGGCAAGGACACCGGCGTTGATTTTCATCAGCCTGTTTGAGTACCCATGGATCCTCT  
GGTGAAACCTTGTGATCTTGGCGATGGAGACACAGGCCTCTTCATGTCTCTCACATTCAATCAGATATCT  
TGGGGACT

TAGATATTCTTTAATACTGGGGTTGTGACTGACCAGGTGGCATCGCCATGAAATGTTCTGCTGTGGAGGA  
TACCCCTGCTGCGATGGCATTGCGGTGGAGGATACGCCTGTTGTTGCTGATGCGAAGGAGGAACCATGAA  
TTGTGGAT

TTGTCTCCTTGAGAGAGAACAGAGCACATTATAAGCAGTCATCAAGTCACTTGGCGTCAAAGCAGATCTCTG  
GTCTTTAAACTCGCTTGTCACTAGGAGACTATGTTTCAAGGACCACAGGAAATTTGTTGAGTAGCAGCTTAT  
ATTCTCCG

CTTCCAATAACGGTACTTCTACTGAAGCTCCAAGTACTACTACTGAAGCTCCAACCACCGGTCTTCC  
AACCAACGGTACCCTTCACTTTCCACCAACTACATCTTTGCCACCAAGCAAACTACCACCACTCCTC  
CTTACAAC

GTGTTATTCAACCCCTTTTCCATACATTCAATGAAGTACGCTGTTAGTTTCGTTCAACTTTGCTGCATCAAC  
CTGCAATGAGGAGCAGATCTCAACCACTGCATCTTCCAATGCCTCAGCATTGACTTTATGTAAATTTTCAA  
ATGACATT

AGCAATGCTGAACACATTATTCTTGTGCTCTCTATCAATATGCAAATGCTCGGCTCCTGTCTGGGAGTGCA  
CCAAATCTACCGCAGTGAGTCTCAGCTCCGGAACCGGTAGAATTCTTCTCACTTCATAACCATGGAATATA  
CCTCCAAC

GTCATCTCAAAGGAAGATAACCTCTTAGAAGCAGTAGTAACTGAGCCTGCCTTCGATGAACTTGAGACGGA  
AGATTGTACCGCTGACATGGGTGTGCTGGATGACGAAGATGTGTAAGTGTCTGTCTTATTAGAGTTGTTT  
TCAATACC

CGGTAGGCGTTGGTTCTGAACAAGAATTAGCAATGCAACCACCAATCTGTGCACCTGGACCAGGGTCACA  
GCCAAACATCAAACCGTGGTGCCTCAAATAGTCATTCAAATCTCCAGGGTAGACCGGCCTGCACGGTGA  
TGTCCAGG

CTGAACATTCTCTTGTACAATGGCTTGTTCATCGTGAGTCATTTCTTCAGCGTCGTAGTTGGCACCTCTTCT  
GGATGGTGGAAACCCATGAGGCAGACTTCCATGGTAGAACACCTTCTTCCCACATGGTGTGACTTCTTCCA  
AAGTCAA

ACTTTGTCAACTCGGATGTTCAAATGCTTAGCGACACGGTTCACATCTCTCCAATCCCTCTCGTAGCATGG  
CTCCTTGCCAGGGTCGTCCAAAGATTGTGATTGAGACCAGTTCTGCATATATACTCCTCGGGTATTTGGAA  
ATTCTCCG

CGTACAAACTCTAACAAGTCTGGGCTTCTTTGATAAACAATGAAAACAGTGTCCCAATCCTCCCAACAC  
TGCAACCATAACGTTGCAGAAGTCCAGACTCATTGTAATCCATTCAATCCAAGGAGGCCTTACTCTAATG  
TACTGCC

TATCAGAGTCCGCTGAGGATGAATCAGTAAATGTATTACCTGACTCAGGTGATGGAGTGCTCAGAGGCGTT  
CCAATGATGATGGATACTGCGGAAACTGTGATTGTGGCCAGGTGGAAAGTACATAGGCGACATTTGATA  
AGGTGTAT

TCCAATTTACCGGAATTTGATAGAGATTCCACTAAGGTTAATTCTCAAGAAGAGACAACACCTGGGACATC  
AGCTGTTCCAGAGAACCATCATCATGTCTCTCTCAACCTGCTTCAGTACCACCTCCACAGAATGGACAGT  
ACCAACAG

TTTGTAAATATATGGAACAGGATCTACTTCTGGTTCTTGTTCAGCCTTTGCTCCCTCATCTGTCAATTTCCAC  
GTCTTACCTTCTACTTTCACTTCTTTTTCAGCTTCGTGTTGTCTGTGAGCTTCGATAGAATCCTTGATAG  
CGTATTTA

GTCTTAAACCATTTCTATCCAATATAGCACCACAGTAACTCCATCAGTGAAAGTTAACAAGCTGGACCA  
TCCAAGGTTCCATCAGACATGCAGCCAGTCGTACCATGCTTTTAGGTCAGAATCCATATCCTTATGATA  
CGCTTCAG

CATTTCTTCAGCGTCGTAGTTGGCACCTCTTCTAGATGGTGGAAACCCATGAGGCAGACTTCCATGGTAGAA  
CACCTTCTTCCCACATGGTGTGACTTCTTCCAAAGTCAAACCTTAGTTTCTGGAACAATAACAAAACA  
TAGAAGAA

TGCAGGTGTAGGTGTATGAAGAGGTGTATCATATGCCATTGACGCCATGAACAGGCCTAAAACACCACCCA  
GTGCAAAACCTGTTACACCACTCACAACCTGATTTTCCAGGACAGGAAGTCATGAAGTTCATGATCATTTC  
GCACCCCG

GTTCTCAAAGTCTATCCATTTGCTTGGAAATACCTAGCTTGTAAAGGTGATCAATGATCGATTGACCGTGTG  
GACCTTGAACCTGCACCTCAGCACATTTGAATGTTTGTGATTCACTTATTGTTGTCGATCCGCTACAAATC  
TTTCTTAA

CCTCTTCCATCTCCACTTCTCTGGCTCAGTAACTATCACATCTTCTGAAGCTCCAGAATCCGACAACGGT  
ACCAGCACAGCTGCACCAACTGAAACCTCAACAGAGGCTCCAACCACTGCTATCCCAACTAACGGTACCTC  
TACTGAAG

CGAAAGTACCGACTCCAACACTAGTGCTACTACCCTGCTAGCACCAACTCCAGCACTAATGCCACTACCA  
CTGCTAGCACCAACTCCAGCACTAATGCCACTACCCTGAAAGTACCAACGCTAGTGCCAAGGAGGACGCC  
AATAAAGA

AACACATTATTCTTGTGCTCTCTATCAATATGCAAATGCTCGGCTCCTGTCTGGGAGTGCACCAAATCTAC  
CGCAGTGAGTCTCAGCTCCGGAACCGGTAGAATTCTTCTCACTTACATAACCATGGAATATACCTCCAAC  
TACTGATATTTT

TAAGTTCAAGACCCAAATATTCGATGATGTGGAAGTTGAGAAAGAAGTTGACATCAGGAAGAGAGTGTTC  
ATGTGTTCAACAAAACCTATCGATGACTTCAATGGTACCTTGTGGAATATAACAAATATTTGGAAGAGGTG  
GAAGACAT

AGAGATTCCACTAAGGTTAATTCTCAACAAGAGACAACACCTGGGACATCAGCTGTTCCAGAGAACCATCA  
TCATGTCTCTCCTCAACCTGCTTCAGTACCACCTCCACAGAATGGACAGTACCAACAGCACGGCATGATGA  
CCCCAAAC

TGCTCCAATGCGTCCACTCTCTCATTGTAATTGTTTAGCACAATTTTCGTTCTCCCTGACAGAGTCCTTGTA  
CAGCGCCAGGTCTCCCGAATCAATGTTCTCCAAGTCGTCGCTGTCGTCAGCTTCAAGACGGTCGTCAGCAC  
CCTCCAAC

GTGGTCACAATATGAAGACTATCCCAGTCATGAAATTGTCTCCACATATGACTCAAGATTGAGCGTCTCTG  
CAGTTTCTTACTCACCGACAGATGGCACCTTAGTGTGCAATGGCTATGACGATACCATCCGCTTATTCGAT  
GTCAAGAG

ACATCCTCTGGTGATAAGCTACTATCGTGATCTAAACAATCTTTGACAGGATCGAGTGAATTTCTGTTCC  
AAACCTGATGATTCCGTTGAGAACTCCAACAGATGTTTTCTCTCTGATTCTCAGCTCTCCTAATTTAGGG  
TATCTACA

TTGAAGAATAAACACGACCTTCACCTTAGGCCAGGAACCTTACTGAATCTACGGTGAATCACACTAATCATT  
CTGATGATGAACTCCCTGGACACCTCCTTCTCGATTACAGGAGCATCACGAACCTTATAAGATCTGCTCAT  
CACATACA

TCATCACCATTCCAAATACTTTTCAATTTATTTTATCCTTTTTCTAGTAGCAAAAGTGACTTGCCAGCGTCTCT  
CTGAGGTGGCATTCTGCTGGAACCTGGTGTGGTGGTTACGTTTGATAAATCATGTTGTGAGATGCTATTTT  
GTAGAAAG

CTGAAGCTCCAACCACCGCTCTTCCAACCTAACGGTACTTCTACTGAAGCTCCAACCTGATACTACTACTGAA  
GCTCCAACCACCGGTCTTCCAACCAACGGTACCCTTACGCTTTCCACCAACTACATCTTTGCCACCAAG  
CAACACTA

TGAGTACGATGGTGATGTTGGTGAGTACGCTGGAGAGGTAGGAGAGTATGTTGGGGAAGTTGGAGAAAAGC  
CTGGTGAGGAGACTCCAAATCCGGGAGATGTAGGTGCTTACCATAAGCACCAATGGAGACGTGGCTTCA  
CCATAATC

AAAGTAATAACAGAGATATTTGACGCTACTGAGGATGCCAAGGAGGCAGACGAAAGTGAAAGAGGAATGCC  
ACTTGCAGACAGCATTGAATACATATCCAAGGCAGCAGCTTGGTCACTATTGGTCTCTACAACCTTAAATCA  
TGGAAGGG

AAACTAAACCATTGTCCAAAGATACATTTCTTTCATTGCTGTTCTCGTTCTGAAGGTTATGTGAGTTTGTA  
GAAGAAGGGACAGAAGCTGCTTCTTTGAAGTTGAACAAGCTGAACATCATCAACACGTTCCGCCATTGAAAGA  
AGTAGGTA

AGATTTGGAACACGACCACGCTGGTGTTCCATTGAAGATCTCCCACCAGTTGTGCTTACAGAGAAACTG  
TTGAAAGTGAATCTTCTCAAACCTGCTTTGTCCAAGTCTCCAACAAGCATAACAGAATCTACTTGAAGGCT  
GAACCAAT

CGGTGGGTTTGCCTCGCAATACATTAGGGGGACTTACTTTCATGGATGTGCATCCTCCTCTTGCAAAGATGT  
TGTATGCTGGTGTGGCATCGCTTGGTGGGTTCCAGGGTGATTTTGACTTCGAAAATATTGGTGACAGCTTT  
CCATCTAC

GTTGTCGTCGACACCATTGAAGGTGTCTGTGTCCAAACCGAAACTGTTTTGAGACAAGCTTTGGGTGAGAG  
AATCAAGCCTGTTGTTGTTATCAACAAGGTGACAGAGCTTTGTTGGAATTGCAAGTTTCTAAGGAAGATT  
TATACCAA

CAAACAAACCACAGCCAACCCAAGTCTAACCGTCTCCACAGTCGTCCAGTTTTATCCTCTGCTTCTTCTC  
ATTCCGTTGTCATCAACAGTAACGGTGCTAACGTGCTCGTTCCAGGTGCTTTAGGTTTGGCTGGTGTGCT  
ATGTTATT

GGTTGTGACTGACCAGGTGGCATCGCCATGAAATGTTCTGCTGTGGAGGATACCCCTGCTGCGATGGCAT  
TTGCGGTGGAGGATACGCTGTTGTTGCTGATGCGAAGGAGGAACCATGAATTGTGGATGATGTTGCTGCG  
GAGGAATA

CTTCAACACTAGCTTCAATAACTTCCAACCTTTGTTGAATGAATGGATGGTCTGGGGCAACCTTGTTAACT  
TTGGAAAGAGATGCTCTTGCTTCGTCAATTTGACCAGCTTCAACCAAATAACGTGGGGATTCTGGAACGAA  
AGTCATAC

GGAACCTTCTGACTATCAAGCGAAGTGGTACTTGGATGACGTCATTGACGCAAATGAGGAAGAAGAGGCAGA  
ACAGACCAATGGAAAGGATGAGACAATGATGGAAATTGATGATGAAATGATGGTGGAGCAAGACAATGAAG  
AGGTAGCA

GTGATAAGCTACTATCGTGATCTAAACAATCTTTGACAGGATCGAGTGAATTTCTGTTTACAAACCTGATG  
ATTCCGTTGAGAACTCCAACAGATGTTTTCTCTCTGATTCTCAGCTCTCCTAATTTAGGGGTATCTACAAA  
GGTACCAA

TTATTTGGTGTGAAACATTCTCTTGTACAATGGCTTGTTCATCGTGAGTCATTTCTTCCAGCGTCGTAGTTGG  
CACCTCTTCTGGATGGTGGAAACCCATGAGGCAGACTTCCATGGTAGAACACCTTCTTCCCACATGGTGTGG  
ACTTCTTC

CGTGGTCAACAAATTAAGTTGTTTTCTCAACTATTTGCAAAGTGCCTGGAGATTGATACTGTGATACCTAA  
CATGCAATCTCAGGCCTCTGATGACCAATATGAGGGTGCCACTGTTATTGAGCCTATTCTGTGGTTATTACG  
ATGTACCG

TCGGAACCTGGTTTTCGGAACTACTGCTATCCACGTCCTCATCATCCTCGTCCCCATTGTCTTCATCTTCATC  
TTCATCTTCATCTTCATCTTCATCTCCATCTTCACCTTCATCGTCATGGCGTTTGTCAATTTGTATCTTCCG  
TTTTCTTCG

TACTGAAGCTCCAACCTGATACTACTACTGAAGCTCCAACCACCGGTCTTCCAACCAACGGTACCACCTTCAG  
CTTTCCCACCAACTACATCTTTGCCACCAAGCAACACTACCACCCTCCTCCTTACAACCCATCTACTGAC  
TACACCAC

CGTAAGACACGAAGACGTTGAAACTGTCAAAAAGAGAAATACAAGAAGCTCTTTTCAGAAAAGCCAACTCGTG  
AACCAACCCCGAGTGTGAAGACAGAGCCTGTGGAACCGGATTACAATCTTATTTGGAAGAAAGAGAAAGG  
CAAGTCAA

AGTTCTTTAAAAGGGTTCATGCCAATCTTCAATGCATATCTCAGATAAACCAAGGAGTGCCCTCAGCGAAA  
CCACTGATCCTCACGCCTCCTCAGCTAGCCAACCAGCAGCAACCTCCACAGGATATTCTTTCTAAACTCTA  
TCTTCTCT

CTAATGCTACTACCACTGCCAGCACCAACGTGAGGACTAGTGCTACTACCACTGCCAGCATCAACGTCAGG  
ACTAGTGCGACTACCACTGAAAGTACCAACTCCAACACTAGTGCTACTACCACCGAAAGTACCGACTCCAA  
CACTAGTG

GAAGAATCATAAAGGATAGCACTTTGATCATGCAATTATTAAGGGACAACCTTGACCTTATGGACCTCTGA  
TATTTCTGAATCTGGTCAAGAAGATCAACAACAACAACAACAGCAACAGCAACAACAGCAACAACAGCAAC  
AACAAAGCT

TTCTTGCCAGCTGCCGATGCCTTATTGGAAATGATTGTCTTGCCTTGGCATCTCCAGTCACTGCTCAAGC  
CTACAGAGCTGAACAATTATACGAAGGTCCAGCTGACGATGCCAACTGTATTGCTATCAAGAAGTGTGATC  
CAAAGCT

TGGCTGTTTTCAACTTCTGTGCTGGAGAGGTAATTTGCGCTTGGCTCAACTTCTTCCAGGTAACCTCTTCTCC  
ACATCCAAATCTTCGTACCCAAATCCCAGGCACCTTCGTCTTCCCAATATCCTCATCGTTAAAGTTTTCT  
TTGCGCTA

ATCCATTCCACCGGTTTTCAAAGATTTCTTGCTAAAGCCAGAACTATCAAGAGCCATCATTGACTGTGGTTT  
TGAACATCCTTCTGAGGTCCAGCAACATACCATTCTCAGTCAATTCATGGTACCGATGTCTTGTGTCAAG  
CAAAGTCT

GTAGAAGCAGTAGCTGACAACAAATCTAAAGGGGAGACGAAAGTTGCTGTGTCTCAAGAGGGATTGAAAGA  
TGTTAGTGACCATGTTGGCCTCGCCAACAAGGATGAGAGCAAGGACGACGACGACGATGATGACTGGGAAT  
GAGTGATT

ACGGTACTTCTACTGAAGCTCCAACCTGATACTACTACTGAAGCTCCAACCACCGGTCTTCCAACCAACGGT  
ACCACTTTCAGCTTTCCACCAACTACATCTTTGCCACCAAGCAACACTACCACCCTCTCCTTACAACCC  
ATCTACTG

GGTGTGGTATGCAAGGTGACATGTTCCGGTATCGTTGTTCCAAGAAACACTACTGTTCCAACCATCAAGAG  
AAGAACCTTTACTACATGTGCTGACAACCAAAACCACCGTTCAATTCAGTCTACCAAGGTGAACGTGTTA  
ACTGTAAA

GTCATTTACGGTGACGGTAGCAGTGGAACCAAAGCTGGGGAACTGTTTCAGAACAAACGTGGTCTCAC  
AAGAAGTGATAGTGACCAAAGTGGTAGATTCTTCTGTGACAGTAGCAGTGGTAATGTTAGAAGCGGCGGAG  
GCAACAGC

GAAGGGCCAAGAGACGTAACATGGAAAGATTGCAATTGGTCACTGGCGGTGAAGCTCAGAACTCTGTGGAA  
GACTTGTGCGCTCAGATTCTTGGGTTTTCTGGCTTGGTCTACCAAGAAACCATAGGCGAGGAAAAATTAC  
ATACGTTA

TACTGTCCATTCTGTGGAGGTGGTACTGAAGCAGGTTGAGGAGAGACATGATGATGGTTCTCTGGAACAGC  
TGATGTCCCAGGTGTTGTCTCTTGTGAGAATTAACCTTAGTGGAATCTCTATCAAATTCGGTAAATTGG  
AAGCTGAA

TCGAATCTTCAGTATGAGTTGACGGAGGTGTGGAATCGGTTGGACTCACAGCTTTTGAAAGGACATTTCTC  
GGTTGCTCAGGATGTAGTTCAATGTCGGATTGGAAGTCATGGTCAGATTCTATGTTAAGATCATTGGATTC  
TTGGATCT

AGTTGTACCCTTTGAAGAGGGCTCGAGATTACGAACAAAATGCAAAGTTTTCTACTAGTCACTCACAGA  
TCATTCTCTCACTCCTGTGTGAAGCCAAATCTGCATGCTCTTTGGTCAAACCAGTTCATCACTTGGTGAA  
AATTGATA

GTTGTCTCCACTGACTTGAATCTATTCAAAGACCAAGGAAGCTGTTGCTGCTTTGAAGGCTGTTGGTGC  
TCACTCCGACTTGTGGAAGGTCTTGAAGTCCAAGAAATTGAGAGCCGGTAAGGGTAAGTACAGAAACAGAA  
GATGGACT

TAAACACAACCTATAGAAAAAGAATGTCTAGCGAAGATAAGAAACCTGTCGTCGACAAGAAGGAAGAGGCTG  
CTCCAAAGCCACCATCCTCTGCTGTCTTCTCCATGTTTGGTGGTAAGAAGGCCGAAAAGCCAGAAACCAAG  
AAAGACGA

CGTATGTCCGGCACGGTTCAACATATCAGCACACGCTAAACCTGCTGGACCAGAACCAATGACACCCACTG  
TAAAGCCAGTGCCTGACTTGGTGGACAAGGCTTAATCCATCCTTCTTGAAGCATTGTCAATGATAATT  
CTTTCAAC

CGGTGCTTTGGTTGTGTCGACACCATTGAAGGTGTCTGTGTCCAAACCGAAACTGTTTTGAGACAAGCTT  
TGGGTGAGAGAATCAAGCCTGTTGTTGTTATCAACAAGGTGACAGAGCTTTGTTGGAATTGCAAGTTTCT  
AAGGAAGA

GAGGCGTTTCGAGAAGCATTGCTGGTAATTCAAAGACTTTGGTGAAGAACTCAGGATTCGACCCATTGGA  
CGTGCTCGCAATGGTGGAGGACGAGTTGGATGACGCTCAGGATTCTGACGAAACGAGATATGTTGGTGTGG  
ACTTGAAC

TCTCTTGTACAATGGCTTATCATCGTGAGCCATTTCTTCAGCGTCGTAGTTGGCACCTCTTCTAGATGGTG  
GAACCCATGAGGCAGACTTCCATGGTAGAACACCTTCTTCCACATGGTGTGACTTCTTCCAAAGTCAAA  
CCCTTAGT

TCACCATGCGCACCATCATAAATAATATTACCGAAAATGACACCTGTGTGTCAGCAGAGGAAACTTTGACAGT  
AACAGTGAATTTGTGGAAGCCATGAGGAATCACGTTGGTCTTCTGTGGTGTGTCAATAATCTTCAAATCAC  
CAAGAGTT

ACTTCCCAAGCTTTTCGTAGCACTCATTCTCCATAATTTAACTTGACGGTCGTCACTGCCGGAGACAATCAA  
TGGTAAAGTTGGATGGAAAGAGGCCAGTTGACACCTCTTGTGTGACCCTCTAGAATAAACTTGACAACAC  
AGTCACCA

ATGTTCTACAACCCTCATAAATGTTGGTAAAATATTTCTTCAATGGCTCCAGCTTGACTACACCCACTTGC  
TTGCTCAAGGCTTGAACAGCGGCATCAAAGGCACCAGCGCAACTAGGACAGCAGGCAGTTTAGAATTCTT  
GATCCAAA

ACCGAAGCTGCTTTACCAAGTTGGACCAAGTCTGGGGTTCCGAAACCGTTGCCTCCTCCAAGGTCGGTTA  
CACTTTGCCATCCACATCATCTCCACTTCTGATGTCACCAGAATTATCAACTCTTCTGAAATCCAATCTG  
CTATCAGA

GGCGCCCCTATCAAATGTCTACTGGTGTACAAGCTCTCCATTAAGTCCATCAGGCTCCACCCAGAACAA  
TTCCACCAAGGCTTGAACAACGGCGAAGAGGAGTTCAATTTGTCACTACTGTGACGCTACTTTTCAGGATTA  
GAGGATAT

GAAAGAGAAGTCTGAGTAGGAGATAAGCTTTTAAACAGAAGTGGTCTCGATAGTAGAGGAAGAAGAAGT  
CTCAACAGCAGAAGTCTCAACAGCAGAAGAAATCTCAACAGCAGAGGAAGTCTCAACGGCAGAGGAAGTCT  
CAGCAGCA

TTGCTGAAGCCGTTTTCAACTACGGTGACTTCACCACCATGTTGACTGGTATTGCCCCAGACCAAGTGACC  
AGAATGATCACCGGTGTTCCATGGTACTCCAGCAGATTAAGCCAGCCATCTCCAGTGCTCTATCCAAGGT  
CGGTATCT

TTACCGTCCAACCATGGGCATGGAACGGTGGTGATGAAGAATTGAGAACCGTTGGTGTGTTGGACCGGCGTT  
GGCCATGGACAACAAACCTGGTCTGTGCGTGGTGCTTCTTGAAGTTTTTCATCTGGGAATTTGCCACCGTGA  
TAGACTTA

TAGACAAAGATTGGAATCCTACGTTGCCTCCATCGAACAAACTGTCACTGACCCAGTCTTGTCTTCTAAAT  
TGAAGAGAGGTTCCAAGTCCAAGATTGAAGCTGCTTTGTCCGATGCTTTGGCTGCTTTGCAAATCGAAGAC  
CCATCTGC

GTGGTCTGGGGTCGCTGGGCACTCCAATAGTGAGAACAGACGCTGCAGCCATATGGGCCACGGGACAGACG  
TGGTGGCAGATCCCACAGTGGCTCAGGTTGAGTTGAAAGGTCAATTGCCTCAGGGTGTTCGGGAAAAGA  
TATCATTG

TGATGAATTGTTGGTTGCCAGAATTACCGGTAGATTAATTCACCCAGCCTCTGGCAGATCCTACCACAAGA  
TCTTTAACCACCAAAGGAAGACATGAAGGATGACGTCACCGGTGAAGCTTTAGTTCAAAGATCTGATGAC  
AATGCAGA

GGTCATCATGCACTGCTGTGGGTACGGCCATTCTGTGGAGGTGGTACTGAAGCAGGTTGAGGAGAGGCAT  
GATGGGGTTCTCTGGAACAGCTGATGAAGCAGGTGTTGTTGTCTGTTGAGAGTTAGCCTTAGTGGAAGCC  
TTCTCACA

ACAAGGATAGCACTTTGATCATGCAATTATTAAGGGACAACCTTGACCTTATGGACCTCTGATATTTCTGAA  
TCTGGTCAAGAAGATCAACAACAACAACAACAACAGCAACAGCAACAGCAACAACAGCAACAACAAGCTCC  
AGCTGAAC

CCGGTTTTCAAAGATTTCTTGCTAAAGCCAGAACTATCAAGAGCCATCATTGACTGTGGTTTTGAACATCCT  
TCTGAGGTCCAGCAACATACCATTCTCAGTCAATTCATGGTACCGATGTCTTGTGTCAAGCAAAGTCTGG  
TTTAGGTA

ATCAGCCTGTTTGAGTACCCATGGATCCTCTGGTGAAACCTTGTTGATCTTGGCGATGGAGACACAGGCCT  
CTTCATGTCTCTCACATTCAATCAGATATCTTGGGGACTCTGGAACATAAACATGCCAACGATGATAATT  
AGAGCCCA

AAGATAGTTAGAGTAACTGGTATAAGAAACAATAATGCAAGACCAACCGTCTCTGTTGTTATTTCGTGGTGC  
AAACAACATGATCATTGATGAAACAGAGCGTTCCCTCCATGATGCACTATGTGTTATTTCGTTGTCTAGTGA  
AAGAGAGA

TACCTGATGGAGGACCATTGCTTTATAGTCAATTTTGGTATCATCACCCAATGTGTTCTCTCCCACTGCTT  
TCAGTCTGCGGAGGGACTCATCTTGAGTAAGACCTTCAGTCAGACTTGTGCCTATAAATTCAGCGGCTTCT  
TCTGTAGT

TGTGGACATCTATTTTGGTGGAGTTGTCTTATGAGCTGGTGTAAAGAGAGGCCAGAATGCCCTTGTGCAG  
ACAACACTGTCAACCACAGGAAATTCGGTCTGCGGCAATAGAGGAACTAATCAATAATTTGACTACTCT  
TTTAGCAT

TGATAATATCCGGAGTTGTTCCCTGGAGTGAGTTCTACTTCTGCTGCCACCTGCACTCATAACAGGTGAATT  
ACCGTTTGTAGTTGTAATGAGGGTGAGGCGTTGAGGCGTGAAATGATTGTTAGAGCCAGAATTTCTGACA  
GGTATTGT

GGAGGGTTATCTCCCGAGATTAGAATGCTCGATCAAATCAGAGTCTTGTCAAGAGCTCAAGAAGTGCCACA  
CGAGGGTGGGTTCTCGGACCTGCTTTGGTCAGACCCTGACAATGTAGAGGCTTGGCAAGTTTCCCCTCGTG  
GTGCAGGA

AGATGCTCCACAAGAACCACAAGTTCCACAGGAATCTGCTCCACAGGAATCTGCTCCACAAGAACCACCAG  
CTCCACAAGAACAAAATGACGTTCCCTCCACCATCTAATGCTCCAATTTATGAAGGCGAAGAATCCCACAGT  
GTCCAAGA

GGTGTCTATCTGGTGCTAACATTGCCACCGAAGTCGCTCAAGAACACTGGTCTGAAACAACAGTTGCTTA  
CCACATTCCAAAGGATTTAGAGGCGAGGGCAAGGACGTCGACCATAAGGTTCTAAAGGCCTTGTTCACA  
GACCTTAC

CACCCACTTGCTTGCTCAAGGCTTGAACAGCGGCATCAAAGGCACCAGCGGCAACTAGGACAGCAGGCAGT  
TTAGAATTCTTGATCCAAATGGCTGTTTCAACTTCTGTGCTGGAGAGGTAATTTGCGCTTGCTCAACTTC  
TTCAGGTA

AAAAGAATACGTCTGCGATGCCTACAAATTAGGCTGTCAATCTGCTCCAAAGCAAACCTATTCATGTTTTGG  
ACAACCAGACAGACCTCAACCAAGGTTGGACAGGAACAGAGACAGCGGTTACGGTGTTCGTTGGTAGA  
ATCAGAGA

AACAAAATGACGTTCTCCACCATCTAATGCTCCAATTTATGAAGGCGAAGAATCCCACAGTGTCCAAGAC  
TACCAAGAGGCCACCAGCACCACCAACCCTGAACCCCAACCATATTATCTCTCTCTCCAGGTGA  
ACACATGC

TCATCATGCACTGCTGTGGGTACGGCCATTCTGTGGAGGTGGTACTGAAGCAGGTTGAGGAGAGGCATGA  
TGGGGTTCTCTGGAACAGCTGATGAAGCAGGTGTTGTTGTCTGTTGAGAGTTAGCCTTAGTGGAAGCCTT  
ATCATATT

AAATGAGATCCAAGAATCCAATGATCTTAACATAGAATCTGACCATGACTTCCAATCCGACATTGAACTAC  
ATCCTGAGCAACCGAGAAATGTCCTTTCAAAGCTGTGAGTCCAACCGATTCCACACCTCCGTCAACTCAT  
ACTGAAGA

ATGAGATCCAAGAATCCAATGATCTTAACATAGAATCTGACCATGACTTCCAATCCGACATTGAACTACAT  
CCTGAGCAACCGAGAAATGTCCTTTCAAAGCTGTGAGTCCAACCGATTCCACACCTCCGTCAACTCATA  
TGAAGATT

ATGTTTACGCTAAGGCTTTGGAAGGTAAGGACTTGAAGGAAATCCTATCTGGTTTTCCATAACGCTGGCCCT  
GTTGCTGGTGTGGTGTGCTTCTGGCGCTGCCGCTGCTGGTGGTGACGCTGCTGCTGAAGAAGAAAAA  
AGAAGAAG

CTGTTGCTGAGCCATCAACTGTTGCTGCTGTGCTTGAACCTGCTCCAACCTGCTTCTGCAAAGTGAATTGTT  
CAATCATCAAATTTGTCAACTCACTTTGGGAACGTCTGTGTGCAACATGAATCTGCTTTGGGGCGTTTTTA  
CCACCTCC

TGGTGACCCCGAGCTAGAATTTAAAGTTTTACAGGGATATAGGGACCTGGAAAGTGAATGCACAAAGGCA  
GAGCTCAGGTGACCAGAACAGGAGATATAGGTGTTGCTATGGACAATCTGAACGCTGTGGATTCCCTATTC  
AATAAGGT

TTTCGAATCTTCAGTATGAGTTGACGGAGGTGTGGAATCGGTTGGACTCACAGCTTTTGAAAGGACATTT  
TCGGTTGCTCAGGATGTAGTTCAATGTCCGATTGGAAGTCATGGTCAGATTCTATGTTAAGATCATTGGAT  
TCTTGGAT

AACGTTGATGACAGATAATGGCAACTTCAAACCCAAAGATTTAACCAAGTCAGAGGTTTGGTTGTCAACGT  
TCAAACACCGTTAGAACGAGACAAGTCAAAGCAGAGACTTCTGGGACGTATTGATCCTTTCTTTCTCTT  
TCTTCTTC

TATATGGTAAGGGTGATATTTAAGGAAGAAATCCACCCTTCTTTAAGGTTTCCACTGCACATGTTGAAATG  
TGTCTGAATCTTGATGAGCCCAAAGGCGTGCCACCATAACCATCTGGTCACTATTACCAAGACGTTGAATAT  
GTTTGCTC

GGTACCGATGTCTTGTGTCAAGCAAAGTCTGGTTTTAGGTAAGACAGCTGTCTTTGTCTTATCCACTCTGCA  
ACAATTGGACCCTGTTCCAGGTGAAGTTGCCGTTGTTGTCAATTTGTAATGCTAGAGAAGTGGCCTATCAA  
TTCGTAAC

TCAAAGAAGTTGCTACTGTTCCAACCTGGTGGTGCTTCTTCTGCTGCTGCCGGTGCTGCCGGTGCTGCTG  
CCGGTGGTGATGCTGCTGAAGAAGAAAAGGAAGAAGAAGCTAAGGAAGAATCTGATGATGACATGGGTTTT  
GGTTTTATT

TCACGAACAAAATGCAAAGGTTTTCACTAGTCACTCACAGATCATTCTCTCACTCCTGTGTGAAGCCAAA  
TCTGCATGCTCTTTGGTCAAACAGTTCATCACTTGGTGAAAATTGATAAGTCAAAGTTATCCCTAGATT  
TCCAGAAT

GCCAGTATTGCCTGTATTGGTACCAAACCTGGGGCATTCAAATGCTGAAGTGGTGGTTCCCTCCTGTCATTG  
TGTTTTGCTGTTCCAAAACCTAGGTCTTCAAATGCACCTTCCCTCCCATGTTATTGGTACTAGCAGCATTATTT  
GTGAAAGG

GAAATGCTCCTTTGTAATATATGGAACAGGATCTACTTCTGGTTCTTGTTCAGCCTTTGCTCCCTCATCTG  
TCATTTCCACGTCTTCACCTTCTACTTTCACTTCTTTTTCAGCTTCGTGTTGTCTGTGAGCTTCGATAGAA  
TCCTTGAT

ACCATAGGCGATCAAACAACGCCCAATCACTCCTCCTAATAACCACTACCTAACCTCACATCCCAGTTG  
TCAAGAAGACTCTCTTCTTCTTCGAGAAGGTCGAGCATGGGGAATAATAACAATTCAGAATTGCCCCCGTC  
AATGATCC

GCCTTAAATGATAGTGAGAGTGATGCTAACGACTCCGATAGTGAAGTTGAAGCTGATTATGGTCCCAACGA  
TGTCCAGGATGTGATCGAGTACAGCTCAGATGAAGAAGAAGGAGTGAACAATAAGAAGAAGGCTGAAAACA  
AGGACATC



ACACCATTGAAGGTGTCTGTGTCCAAACCGAAACTGTTTTGAGACAAGCTTTGGGTGAGAGAATCAAGCCT  
GTTGTTGTTATCAACAAGGTCGACAGAGCTTTGTTGGAATTGCAAGTTTCTAAGGAAGATTTATACCAAAC  
CTTTGCCA

TATCGGCACAACGGACCTGGGTTGACAAGAGCTTGAAGGCTCCAAGAGACAGCGACCGTCGGCGCCGAATG  
ACGAAACTATGCTGTGTGTGACCAGGCGAACAACATTGAGAGAGTTGAGGAGCCGTACGGACAGCTGTTTG  
TAGTGATA

TCTCTCTGGTGTGGGTGTGTGGGTGTGTGGGTGTGGGTGTGGGTGTGGGTGTGGGTGTGGGTGTGGGTGT  
GGTGTGGTGTGTGTGGGTGTGGTGTGGTGTGTATATATATGTCACTGTATTGCATGCTGGATGGTGTTAGA  
CAAGGCCG

CCTACAAATTAGGCTGTCATTCTGCTCCAAAGCAAACCTATTCATGTTTTGGAACAACCAGACAGACCTCAA  
CCAAGTTGGACAGGAACAGAGACAGCGGTTACGGTGTTCGTTGGTGAATCAGAGAAGACCCATTGTT  
AGATTTCA

ATTGTCCAAAGATACATTTCTTCATTGCTGTTCTCGTTCTGAAGGTTATGTGAGTTTGTAGAAGAAGGGA  
CAGAACTGCTTCTTTGAAGTTGAACAAGCTGAACATCATCAACACGTTTCGCCATTGAAAGAAGTAGGTACA  
TTAACGTT

AGCTCAATTAGTCGATGAAACCTTCTGTAATGCTCTAGAATACGGTTTACCACCAACTGGTGGTTGGGGTT  
GTGGTATTGATAGACTGGCCATGTTCTTGACCGACTCCAACACCATTAGAGAAGTCTTATTGTTCCCAACT  
TTGAAGCC

AAGAGAAGCTGTTAGTGGCCTGTCTTGCTGTCTTTACAGCGGTCATTAGATTGCATGGCTTGGCATGGCCT  
GACAGCGTGGTGTGGTATGAAGTACATTTCCGGTGGGTTTGCCTCGCAATACATTAGGGGGACTTACTTCAT  
GGATGTGC

AGGTTCTTACATTGACAAGAAATGTCCATTCACTGGTTTTAGTTTTCCATCCGTGGTAAGATCTTGACCGGTA  
CCGTGCTCTCCACCAAGATGCACCGTACCATTGTCATCAGAAGGGCTTACTTGCATTACATTCCAAAGTAC  
AACAGATA

ATGAGAATTATGAGATCATATTATAAACTACTTCGAGGATTTGCCACAGAGGTCAAGGATAAAGTCTGGTT  
TCTCGAAGGAGTCACGCAGGTGCTGCCTCAAGATGTTGACGAATACAGTGGAGGTGGTGGTATGCATATGA  
TGCTAGAT

TGAAAGTACCAACTCCAGCACTAATGCTACTACCACTGCCAGCACCAACGTCAGGACTAGTGCTACTACCA  
CTGCCAGCATCAACGTCAGGACTAGTGCAGTACCCTGAAAGTACCAACTCCAACACTAGTGCTACTACC  
ACCGAAAG

GGTTATGATGACGAGGATGGTGAAGAAGAGGACCAAGACGAAGATATGGTGGGTGACAGCGGCACTACAAG  
ACAGGAAGATGGTGGCGAGGACAGCAACTCGAGAAGATATCCATCATATTACCATTGTAATACTGCCAGGA  
ATAATAGG

GCTGAAGAGTTCAAGGCTGCCGATGAAGCTTTTGCCAAGAAGCACGAAGCTAGACAAAGATTGGAATCCTA  
CGTTGCCCTCCATCGAACAACCTGTCAGTACCAGTCTTGTCTTCTAAATTGAAGAGAGGTTCCAAGTCCA  
AGATTGAA

ATATGAATTATGATAATATCCGGAGTTGTTTCTGGAGTGAGTTCTACTTCTGCTGCCACCTGCACTCATA  
CAGGTGAATTACCCTTTGAGTTGTAATGAGGGTGAGGCGGTTGAGGCGTGAAATGATTGTTAGAGCCAGAA  
TTTCTGA

CAGCAGGCAGTTTAGAATTCTTGATCCAAATGGCTGTTTTCAACTTCTGTGCTGGAGAGGTAATTTGCCT  
TGCTCAACTTCTTCAGGTAACCTTCTCCACATCCAAATCTTCGTACCCAAATCCAGGCACCTTCGCT  
TTCACCA

TATAGAAAAAGAATGTCTAGCGAAGATAAGAAACCTGTCGTCGACAAGAAGGAAGAGGCTGCTCCAAAGCC  
ACCATCCTCTGCTGTCTTCTCCATGTTTGGTGGTAAGAAGGCCGAAAAGCCAGAAACCAAGAAAGACGAAG  
AAGATACC

TGCTAATCCAGGAGCTGGCGAGCTGGCTAGCTGTGGAGACTATTCCACCATGGTACACACTAGGATCCTCG  
ATCTTGGTGAGCCATGAGTAGAACTTGTGGTTCCACCCCTCCGGTTGCCATGTTTATATCTTCCTCAGC  
AAACTGTT

CACTTGTATGTCCATGAGTAACTGAAGGGTTAGTTTTAGTACTGGAATGATCCTGTGCAGCAGCGGTGGAT  
TTAGGACCAGTGCTTGAACCAGAGTGACCATGGCTAACAGGGTGGGTAGTTTTGACGTTGATATGTCCATG  
TGTAGTTG

CAGAAGCATTGCTGGTAATTCCAAAGACTTTGGTGAAGAACTCAGGATTCGACCCATTGGACGTGCTCGCA  
ATGGTGGAGGACGAGTTGGATGACGCTCAGGATTCTGACGAAACGAGATATGTTGGTGTGGACTTGAACAT  
AGGTGATT

TCTTCAACTTGGTTCTCAAAGTCTATCCATTTGCTTGGAAATACCTAGCTTGTTAAGGTGATCAATGATCGAT  
TGACCGTGTGGACCTTGAACCTGCACCTCAGCACATTTGAATGTTTGTGATTCACTTATTGTTGTGATCC  
GCTACAAA

CCAGTTCCCTGGACAAGCCTATTACTATAGTCTGAATACGGTTATGATGACGAGGATGGTGAAGAAGAGG  
ACCAAGACGAAGATATGGTGGGTGACAGCGGCACTACAAGACAGGAAGATGGTGGCGAGGACAGCAACTCG  
AGAAGATA

AGTAAGAGAACAAGATCAATACCAAGGAGGTCCCTCGAAAGAGCTTGACAGGCTACAACCACCACCTTCAA  
TGAAGAAAAGCCCTCCAAGGAAGAAGAAGAGCCTAAAGGACTTGATATATGAAACGAACAAGACATTCTAT  
CAGGTGGA

TCCAGCTAGGGAGCCATCACGCCTTGTGGTGGCAACAAGAAGAAGAGACCGATGAAGTTATGAGCACCATT  
TCCAGGAATCCACATCACTCTTTGAGTGTCAAGTCATCATTGGTGATACTTCTAGGTACAACCTGTGATCAT  
CTCTTTTT

TCCAGAGGCGGCTTCCGGTGGCCCCAGAGGTGGATTTGGTGGTCCAAGAGGTGGTTACGGTGGCTATTCCAG  
AGGTGGCTACGGTGGCTACTCCAGAGGCGGATATGGTGGCTCCAGAGGTGGTTACGATAGTCTTAGAGGTG  
GTTACGAT

TACCATTTTCATGGGTTGCTCTACTTTTTCCGAATATACTGTGGTGGCAGATGTCTCTGTGGTTGCCATCGA  
TCCAAAAGCTCCCTTGGATGCTGCCTGTTTACTGGGTTGTGGTGTACTACTGGTTTTGGGGCGGCTCTTA  
AGACAGCT

GAAAATGGAGTAGCTTCTCGAACAGATGAGAGTACAATAACAGGAAGTGCGACGGATGCAGAAACAGGTGA  
TGATGATGATGATGATGATGATGACGATGATGAAGATGAGGATGACGAAGATGAGCCCCCTTATTGAAGT  
ACACACGA

CTTTCGTAGCACTCATTCTCCATAATTTAACTTGACGGTCGTCCTGCGGAGACAATCAATGGTAAAGTT  
GGATGGAAAGAGGCCAGTTGACACCTCTTGTGTGACCCTCTAGAATAAACTTGACAACACAGTCACCAAG  
AGAGCCAT

TGAAGTAGCCACGTCACCTTGAGCTAGTTGGATCTGTTGATGTGGTTACCTCGTCAGAGCTTCTTGTACGAT  
ACATACCAGCAACACTTGATGAGGCATGTGGACCAACTGTTGTAGTAGACTCAATTAAGATGTAGAGTCC  
GTGGAAGT

CGTGATTGGCAATTGTGCTCTAATAGTTACTCTATTATTGCTGTTAATTGACAATGTTTGTAGTCACGTGCAA  
CACAATTCAGTCACGTGGAAAGGCCTTCACATGGTGATCCATCTTCTACATCTTCATCGGTCCTGCATAA  
AGTCATAA

AGATGTTTATTCCAATCCTATTCTGTGCTAGCTACCTAGATACCTTAAACTTGAACCACTCCATGTCTGTAC  
GGCAAACACAACAGCAACAACAACAGCGGCAACAGCAGCAGTATGTAGACTCTTCATCGGCATTTCAATGC  
TGTACAGA

TTGGGTTGATATTGTTAATAATAGCACCCACATTCTCAGAAGACCTTTGTGAAATCTGAGATGCAGTGCAA  
GATGAAATTGAACCTAAAGGTGCCTTCTCTGAAAGAGTTGGACTTATAGATGCAGCATTGTTCTTAAAGG  
ATTCATTT

CAAGGACTTGTTGTTGTTAGATGTTGCTCCATTATCTCTAGGTGTTGGTATGCAAGGTGACATGTTCCGTA  
TCGTTGTTCCAAGAACTACTGTTCCAACCATCAAGAGAAGAACCTTTACTACATGTGCTGACAACCAA  
ACCACCGT

TACCTGACTCGGTGATGGACATTAACATAGACGATATTCTTGCAGAACTGGATAAGGAACTACTGCTGTC  
GACTCTACCAAGATCACGCAAGGTTCTTCTTCCACTACCCACAGAGATGCAAATACAATAGTGGGTTTCGTC  
CTTAGACT

AAGTGGACTAGGCAACCATGGAAAGAACTCTGATATGGATGTTGAAGATCGTCTCCAGGCCGTTGTCTTGA  
CAGACTCTTATGAAACTAGGTTTATGCCACTGACAGCTGTCAAGCCAAGGTGTTTGTGCCACTGGCTAAC  
GTACCTCT

CAATTACGCTAAAACCATAAGGATAATGTCTGAAGCTCAAGAACTCACGTAGAGCAACTACCAGAATCTG  
TTGTGATGCCCGAGTCGAAGAACAGCACCAAGAACCACCACAGGCTCCAGATGCTCCACAAGAACCACAA  
GTTCCACA

TACTTTTTGGTGGTAAGCGACTAAACCCTTAGCAATAGCTTGTCTGATGGCGTAGACTTGAGAAACATGACC  
ACCACCAGTACTCTAACTCTGATATCGATGTTGGAGAACTTGTCCAAACCAACCAACAATAATGGTTTCGT  
AGACCTTG

GGTAACAGAGTCACCCCATCTTTTCGTTGCTTTCACTCCAGAAGAAAGATTGATTGGTGATGCTGCCAAGAA  
CCAAGCTGCTTTGAACCCAAGAACTGTCTTCGATGCTAAGCGTTTGATTGGTAGAAGATTCGACGACG  
AATCTGTT

AATAATATTACCGAAAATGACACCTGTGTGCTAGCAGAGGAACTTTGACAGTAACAGTGAATTTGTGGAAGC  
CATGAGGAATCACGTTGGTCTTCTGTGGTGTGTCAATAATCTTCAAATCACCAAGAGTTGCAAATTGCACA  
TGTAGGTT

GACAACATGCTTACCGTCCAACCATGGGCATGGAACGGTGGTGATGAAGAATTGAGAACCGTTGGTGTGTTG  
GACCGCGTTGGCCATGGACAACAAACCTGGTCTGTGCTGGTGCTTCTTGAAGTTTTTCATCTGGGAATTTG  
CCACCGTA

TATTTTGTGGAGTTGTCTTATGAGCTGGTGTAAAGAGAGGCCAGAATGCCCTTGTGCAGACAACACTGT  
CAACCACAGGAAATTTCTGGTCTGCGGCAATAGAGGAACTAATCAATAATTTGACTACTCTTTTAGCATTG  
TCCACAGG

AGCAGCAGCAGTAGCGTAAGACCAAGTTAGTATGGCTACGTTCAACCCACAAAACGAGATGGAGAACCAGG  
CACGTGTACAAGAGTACAAGGTCTCCACTGGCAGAGGCGGAGCTGGCAACATCCATAAATCTATGTCCAAG  
CCGTCTCC

CTCCGACTTAACCGGATCAGATACACTATTGTGGTGTAACTGACCTTGACTGTCTAAACAACCTCTCTT  
GTTGTGCTAGCAGCTCTTCTTCCGAGAGACCTGACTTCTTGAACCTGGAATCCCTAGTTTCTTTACCTTC  
TGGGAACC

GCTTGAGACCCTGGTTGTAGTTGCTGCAGTTGCTGCACATGACTGGACTCCTCCTGTAACCTGCTGCCTTTG  
CTGTTGAATCTGGTGTGCTTTAGCTGTTGCTGTTGTTCTCTCAAGGTTCTATAATAGTTTTTTGCCGCCT  
TAAGGGCC

CGACTACTTTGGCCCAATTTTCCAACAGTACATCTGCTTCTTCCACCGATGTCACTTCCTCCTCTTCCATC  
TCCACTTCTCTGGCTCAGTAACTATCACATCTTCTGAAGCTCCAGAATCCGACAACGGTACCAGCACAGC  
TGCACCAA

TTCTTAGCATTACATCCATCCATTTCTGTTAATAGTTGGTTGACGACTCTATCCGAAGCACCACCAGCATC  
ACCCAAGGAACCACCTCTTGCCTTGGCAATGGAGTCTAATTCATCTAGAAAAACGACGGTTGGTGCAGCTG  
CTCTTGCC

CTCCACTTCTCTGGCTCAGTAACTATCACATCTTCTGAAGCTCCAGAATCCGACAACGGTACCAGCACAG  
CTGCACCAACTGAAACCTCAACAGAGGCTCCAACCACTGCTATCCCAACTAACGGTACCTCTACTGAAGCT  
CCAACCAC

TGGTTCCTGAACAAGAATTAGCAATGCAACCACCAATCTGTGCACCTGGACCAGGGTCACAGCCAAACATC  
AAACCGTGGTGCCTCAAATAGTCATTCAAATCTCCAGGGTAGACCGGCCTGCACGGTGATGTCCAGGTC  
CAGCTTGT

CACAATACGTTATACTCACATTAATATCCAGCCTGCAGAAAGTGCCACCAAGATTGAATCAACCACAATA  
GCATTTGTCAAGGAACCTGCCTTGGGATCTACACACCATTGTACCTGTTTTCGAATGGTGTATCATTGTGGG  
AACCAATG

CATAGAATCTGACCATGACTTCCAATCCGACATTGAACTACATCTGAGCAACCGAGAAATGTCTTTCAA  
AAGCTGTGAGTCCAACCGATTCCACACCTCCGTCAACTCATACTGAAGATTCGAAACGTGTTTCTAAAACC  
AATATTCG

TGAGATCATATTATAAACTACTTCGAGGATTTGCCACAGAGGTCAAGGATAAAGTCTGGTTTCTCGAAGGA  
GTCACGCAGGTGCTGCCTCAAGATGTTGACGAATACAGTGGAGGTGGTGGTATGCATATGATGCTAGATTT  
CCTCGGTG

TTCTTGTCTTCGTATTTCTTTTCTCTGCATCTTCATCATTCTCGTTGCTGGAGTCCTCAGATTCGCTAC  
TGCTGAACATTAAGTCATCGGCTGCTTGTCTACTTGAAGCCTGAGAGGGCTCTTTCTTATACTTTGAGTC  
TCATCTTC

GCCATCAACTGTTGCTGCTGTGCTTGAACCTGCTTCTGCAAAGTGAATTGTTCAATCATCAA  
ATTTGTCAACTCACTTTGGGAACGTCTGTGTGCAACATGAATCTGCTTTGGGGCGTTTTTACCACCTCCTG  
TGGTTTGC

AGCGGGCCCTCAGGGCTGGTCTACTGCCTTATACTCTAGGATGTACATCCTACCACACACAACAAGCCTGT  
CACACCATGACTACAGATCCTTCTGTCAAATTGAAGTCCGCCAAAGACTCCCTCGTCTCCTCCCTCTTCGA  
GTTATCAA

AGAGGGCACTATTGCTAAGTTTGGGTTGATATTGTTAATAATAGCACCCACATTCTCAGAAGACCTTTGTG  
AAATCTGAGATGCAGTGAAGATGAAATTGAACCTAAAGGTGCCTTCTCTGAAAGAGTTGGACTTATAGAT  
GCAGCATT

TGAAAGCAGTACGAATCGTCTCTTGGACGACTTTATCTGTCTCCACGTCGACTGCGGCCGTGGCTTCATCA  
AGCACAAAATCTTTGATGGAACCAACATTGCTCTTGCAAGACATAATAATTGTCTTTGTCCAACACTTAA  
GTTGCCAC

ATTGAATCATAATCCGTATTCTCTCTTCGTTCTTTAAAGTTTGGTTGGTGAAGAATCCTCAAGTGGTAATTC  
CACTGTCTCCCTTGCATTTATTGGCTGGTTTGGAGAGTTAGGCACATCCTCATCAAAGATATTTGTCAAAG  
TCATCGCT

GCTTCCTTACCTCAGGTTGGACTTCCAATTTGATATTCTCCATCACCTCACTTTTCACTTTCTTGTCTGCTGC  
TCCAGTTGAAGGACCAACAGGCTCTTCTGTTTTCGATTCTGATAGACGATAAGTCCGTGGATTTTATAGAAT  
GATCATAA

ATCGAAGCACTACGTAGTTCTGAAATTTTGGAAAGTATCTGCTGATGGAGAGAACGTCAAGAGACGTGTTCC  
TTTGGACCTAACTGCTGCCAGAAATGCCAGAATTGAGCAAAACCAACGGACTTTGGCTGTAATGAATTTCC  
CACATGAG

ACTTGGATGCTAGTGTAATTTCTTTTAGGTTGACCATTACTTTGAGTATCACGCTCCCCAGCAGCAGCAGCT  
TCTTCATCCTGCTCAGACATTTGTCCTTCATCAGTGCTATTATCTGAATCACGTACGTTATTTCATCATAGA  
GAAGATGT

CGGTGGCGGAGCTTGAGACCCTGGTTGTAGTTGCTGCAGTTGCTGCACATGACTGGACTCCTCCTGTAAC  
GCTGCCTTTGCTGTTGAATCTGGTGCTGCTTTAGCTGTTGCTGTTGTTCTCTCAAGGTTCTATAATAGTTT  
TTTGCCGC

CTTCATTGCTGTTCTCGTTCTGAAGTTATGTGAGTTTGTAGAAGAAGGGACAGAAGTCTTTGAAAGT  
TGAACAAGCTGAACATCATCAACACGTTCCGCATTGAAAGAAGTAGGTACATTAACGTTTCTTGTTGTTG  
TGGTTGTT

ACTTCTCCTCTGAAGTTACTGCCGCTTTACGTGTCACTGACGGTGCTTTGGTTGTCGTCGACACCATTGAA  
GGTGTCTGTGTCCAAACCGAAACTGTTTTGAGACAAGCTTTGGGTGAGAGAATCAAGCCTGTTGTTGTTAT  
CAACAAGG

CTACCAAGAGGCCACCAGCACCAACCAACCTGAACCCCAACCATATTATCCTCCTCCTCCTCCAGGTG  
AACACATGCACGGTCGCCACCAATGCACCACCGTCAAGAAGGAGAAGTCTCGAACACCAGATTGTTTGTT  
AGACCTTT

GATCTTAACATAGAATCTGACCATGACTTCCAATCCGACATTGAACTACATCCTGAGCAACCGAGAAATGT  
CCTTTCAAAGCTGTGAGTCCAACCGATTCCACACCTCCGTCAACTCATACTGAAGATTCGAAACGTGTTT  
CTAAAACC

AACCACCGCTCTTCCAACCTAACGGTACTTCTACTGAAGCTCCAACCTGATACTACTACTGAAGCTCCAACCA  
CCGGTCTTCCAACCAACGGTACCCTTCCAGCTTTCCACCAACTACATCTTTGCCACCAAGCAACACTACC  
ACCACTCC

TATTACTGCACCAGTTGGGGCCAACCTACGCTGGATCGACGTGGGATTGGCAGGGAAGAAGTTCGAGGGAGG  
TGGTCGGAGAAGAGAGTGGGATGCGGGCGTGGGGTCTGCTGTTACTTTTATCGGCACAACGGACCTGGGT  
TGACAAGA

GTAATCAATCATAACAGGAAGCGATAAGAAAGTTTACATTGCACAGCCACCCTCATTGCCTCTGTGATTGA  
AGATCTGGGAGTGGGGCTAAAGGTGCAACTTCCGTACAAGAGTGACGAGATAAAGGATTTTCCACGGAATG  
GCTGACAA

CCGCCACGGTTTTATCCACAACAAGTGCCATTTCCAGGTCAACCACAGGGGGTCAATTTCCACAGCCTTC  
ATCAGAACAGCAGGTGTTTAAACCAGCTTCCACAAGTGACTCAAACCTTTTCACAACTCTGCGCAGAATACGA  
ATGCAACT

TAAACACCCTGGTACAGTCATCCAGGAACCTAACGTATTTGGAACCTCAGGAAAAGGAACTGGAGATACCACA  
AGACGTTGAAGGCCTGGCTCACCAAAGATCCTATGATGGAACCTATTGTATCCGCTGATGGTTTAAAGTGAA  
AGGGGATC

CATCGTGAGCCATTTCTTCCAGCGTCGTAGTTGGCACCTCTTCTAGATGGTGGAAACCCATGAGGCAGACTTC  
CATGGTAGAACCTTCTTCCACATGGTGTGACTTCTTCCAAAGTCAAACCTTAGTTTTCTGGAACAAC  
TAACAAAA

TGATAAGACTCCATACGATGACATGCGTTTATTGAGTTTGTATGTGGTGGCCACAAGCTCAACCTGGAGGA  
GTGCCTTTTCTAATCTGGTCTCATCCATCTTTGATGTGTGCTTCTTTAATAATTGCGACACCACCCTACCA  
ATATCGTA

GCAAACCAAACGTCAAACACCGCTCAGGTAGCTTCATCGAACCCCTATGCTCCACCACCACAACAAAGAGT  
AGCAACCCCATTATCTGGAGGCGTGCCTCCAGCTCCGTTGCCAAAGGCCTCTAATCCATATGCTCCAACCTG  
CAACCACT

TATTCAATGTGGTGTCTATCTGGTGTAAACATTGCCACCGAAGTCGCTCAAGAACACTGGTCTGAAACAA  
CAGTTGCTTACCACATTCCAAAGGATTTTCAGAGGCGAGGGCAAGGACGTCGACCATAAGGTTCTAAAGGC  
TTGTTCCA

GAACTTGCATCGGATGATCCATTGAATTGCAAGTGTGCTGCTGTTGTTGTGGTTGCGGTTGCGGTTGTGG  
CTGCAACTGTGATTGCGATTGAAACATCTGGGTTGTCTGTGGTGTGCTGCGACGTGAGGTTAGTAAATCCAC  
CGTTATTA

TGGCTTTGAGATCACTGGTCTTTGAACGAAGTTGGAGGCATCCATCTGGTCTGGTAAAGTAACATCTTGTT  
CATCAACTTCAGCTTGCTCCAAGAAAGCAGAAGCAGCCGCTTCATCTCCGTTAGCCTTTGCTACGGCATAA  
GCTAATGG

GGTTCTTAGCGAACAAATAACCGAATAGAGTAGCTGAAGAGGCGATGACAGAGTATTTTAAACCACTGGCTG  
CTGCTGTGCGGTGCTGCCTGTGCCTGTTGAGGCGTATCTGTAGCATGATCTTCTCACCAGCCTTCTCTAGG  
TTGTGCAA

CATCGCCATGAAATGTTCTGCTGTGGAGGATACCCCTGCTGCGATGGCATTGCGGTGGAGGATACGCCT  
GTTGTTGCTGATGCGAAGGAGGAACCATGAATTGTGGATGATGTTGCTGCGGAGGAATAGCAAATTGTTGC  
TGAGATGG

ATGAATCATCGTTGAATGACAATAATGATAATGATAACAGCAAGGACAGGGAGGAAACATCTTCTCACGCA  
AGGACGGTTTTCTATTGACGACATTCTGAACTCTACTTTGGAACACGATAGTAATAGCATTGAAGAGCAGAG  
TTTGGTGG

CCTAACAAACCATTGGCGGTACTTTGGAAGTTGTTGGTAACTTCACCTCCTTGAACCTAGACTCTTTGAAGT  
CTGTCAAGGGTGGCGCAGATGTGCAATCAAAGTCAAGCAATTTCTCCTGTAATGCTTTGAAAGCTTTGCAA  
AAGAAAGG

GTGTTCTGAGTCTGACCAAGGCACTAGTACAGAAGAAGAGGATGAAGTAGATGAAGAGCAAGTCCAGGCG  
TATGCTCCACAGATTAGTGATGGATTGGATGGAGACCACCAGCTAAATTCTGTAACGAGCAAAGAAAATGT  
ACTTGAAA

GCGCCACGCCTACCAGGATCAACAAGTCTACTAGAGTGCAGGGTACTCAACAGTGTGATCTGGATGAGC  
GACAGCTTCTCTTCTCCGCGAGCGATGCGGAACATCTTGTGTAAGATTTGCTTGATTCCGGTAGCAGTGCG  
GGTATCGT

CATCAGGAATACTCTGGAATAAATACCATGTGTAAGTACTAGGACAACAACATCTCTGGGTCTTCTCTTTGCC  
TATCATGGAAGTGCCTGAATAAAGTCTCTTGGAACTGGCGACTCTGTTCATATACATCTGCCGCACTTTCT  
CCATGAGG

GTTCTTTGCGAGCGCCTGATATAAAGCTGTTGCGTAAGTGCCTCAACACCGAACAATCTCACCGGTGGGG  
GAGCAGCAGCTTTGGAAGCAGCAGCTCTTAAGCTTGATGCAAATGACCTGGTAAAGACTCTATTAACATG  
ATTGTCCA

CTTGACGGTCGTCCTGCGGAGACAATCAATGGTAAAGTTGGATGGAAAGAGGCCAGTTGACACCTCTT  
GTGTGACCCTCTAGAATAAAGTCTTGAACAACAGTCACCAAGAGAGCCATCCAATAGATTTTGTGTGCACT  
CATTTGCT

CCCTAGCAGGCCCAGAATAAACGAAATACGTCCCCTTACAGATTTCAAAGAGCCCATTTCACTGGACACTC  
ATTTTGATGGTGTGAGCCACTCACAAGAGACCATAGTCACAGAGGAAATACCAATGAGTATACTCAATGGT  
GAGCAAGG

GACTGTCCAGCCGGTAACATTATCGGTTTAGTCGGTATCGATCAATTCTTGTGAAGACTGGTACTTTGAC  
CACCAGTGAAACTGCTCACAACATGAAGGTCATGAAATTCTCTGTCTCTCCAGTTGTGCAAGTCGCTGTCTG  
AAGTCAAG

AAACCTGTGTCGACAGAAGGAAGAGGCTGCTCCAAAGCCACCATCCTCTGCTGTCTTCTCCATGTTTGG  
TGGTAAGAAGGCCGAAAAGCCAGAAACCAAGAAAGACGAAGAAGATACCAAGGAGGAAACCAAGAAGGAAG  
GTGATGAT

GTGGCCTTGATTGTCATAATTGTTACAACCTGTCGATAAATCGAAGGTGGTTGTCCCCATTGCCAAGTTT  
GCCAGTACTGAGCAGCATCACCTTGTAGATATTCGAACTGGATTTGGAAATTTGGCATCCAACTGTGCAA  
CCGTCAGA

ATTGCTAAGTTTGGGTTGATATTGTTAATAATAGCACCCACATTCTCAGAAGACCTTTGTGAAATCTGAGA  
TGCAGTGAAGATGAAATTGAACCTAAAGGTGCCTTCTCTGAAAGAGTTGGACTTATAGATGCAGCATTGT  
TCCTTAAG

ACATCTATCCAATAATCTTGCTCAAAATTAACCTTTGTCAACTCGGATGTTCAAATGCTTAGCGACACGGTT  
CACATCTCTCCAATCCCTCTCGTAGCATGGCTCCTTGCCAGGGTCTGTCCAAAGATTGTGATTAGACCAGT  
TCTGCATA

GGTGTGTTGGTGAGTACGCTGGAGAGGTAGGAGAGTATGTTGGGGAAGTTGGAGAAAAGCCTGGTGAGGA  
GACTCCAAATCCGGGAGATGTAGGTGCTTACCATAAGCACCAAATGGAGACGTGGCTTACCATAATCAG  
CACCACCG

ATATTTCTGAATCTGGTCAAGAAGATCAACAACAACAACAACAACAGCAACAGCAACAGCAACAACAGCAA  
CAACAAGCTCCAGCTGAACAACTCAAGGTGAACCAACCAAATAAGAGCGCTGAGAAATACAAGGGGAAAT  
GAAGATTT

GCAAGGACGTCGACCATAAGGTTCTAAAGGCCTTGTTCCACAGACCTTACTTCCACGTTAGTGTTCATCGAA  
GATGTTGCTGGTATCTCCATCTGTGGTGCTTTGAAGAACGTTGTTGCCTTAGGTTGTGGTTTTGCTCGAAGG  
TCTAGGCT

CGATGAAGCTTTTGCCAAGAAGCACGAAGCTAGACAAAGATTGGAATCCTACGTTGCCTCCATCGAACAAA  
CTGTCACTGACCCAGTCTTGTCTTCTAAATTGAAGAGAGGTTCCAAGTCCAAGATTGAAGCTGCTTTGTCC  
GATGCTTT

CGACCATAAGGTTCTAAAGGCCTTGTTCCACAGACCTTACTTCCACGTTAGTGTTCATCGAAGATGTTGCTG  
GTATCTCCATCTGTGGTGCTTTGAAGAACGTTGTTGCCTTAGGTTGTGGTTTTGCTCGAAGGTTAGGCTGG  
GGTAACAA

ACTCCATAATATTGCCATTATCAGCTGCCACAAGTACTCTCTTTGATCTTGCACGCTGCTTGTTTCAATT  
ACAGCCACCACTGGGTGCTGAAAGTAGTGTCTTGGCCACCATATTTGCTGCACGACATACACTACCGGTGT  
TTCTGGCT

GAACATATCGTTGCTGGTACCGGTGAATTGCATTTGGAAATTTGTTTGCAAGATTTGGAACACGACCACGC  
TGGTGTTCATTGAAGATCTCCCCACCAGTTGTCTGCTTACAGAGAACTGTTGAAAGTGAATCTTCTCAA  
CTGCTTTG

AGACGTATCTGAATGTAGGTTTACTTTAATGGCGACCTTGTTCCACCCACAAGACAAATAGACTCTACCA  
TTCCTCAGGGTTGCACCATCACAGCGACTCGCCTGAACTCGCCGGTTACACCATAGTGGAGTTAGAACAT  
TTAGCAAG

TGATTGAGTCCAACATAAATGAAGGTAGACAAGATATTCCAAAGAAGGTGGCAGAGAGGGATTGAAGTAT  
GGTTGTTCTGTTACGGATGCTTGTATTGGCTGGGAGTCCACCGAACAGGTATTGGAGCTATTGGCAGAAGG  
TGTTAGAA

ATCATCGTCCTTGTCTCCTTGGAGAGAACAGAGCACATTATAAGCAGTCATCAAGTCACTTGGCGTCAAAG  
CAGATCTCTGGTCTTTAAACTCGCTTGTCTACTAGGAGACTATGTTTCAGGGACCACAGGAAATTTGTTGAGT  
AGCAGCTT

ATGTTGGTAAAATATTTCTTCAATGGCTCCAGCTTGACTACACCCACTTGCTTGCTCAAGGCTTGAACAGC  
GGCATCAAAGGCACCAGCGGCAACTAGGACAGCAGGCAGTTTAGAATTCTTGATCCAAATGGCTGTTTCAA  
CTTCCTGT

ATCTGGTCAAGAAGATCAACAACAACAACAACAACAGCAACAGCAACAGCAACAACAGCAACAACAAGCTC  
CAGCTGAACAAACTCAAGGTGAACCAACCAATAAGAGCGCTGAGAAATACAAGGGGAAATGAAGATTTAC  
CACTCCAG

TTCCCCGTCTTCGGAAGTGGTTTTCGGAAGTACTGCTATCCACGTCCTCATCATCTCGTCCCCATTGTCTT  
CATCTTCATCTTCATCTTCATCTTCATCTTCATCTCCATCTTCACCTTCATCGTCATGGCGTTTGTCAAT  
GTATCTTC

AGTATTGAGATATTACGTAGAGGTGCTGTAATAGGTACTGTTAGTGTGAGCACGCACCTCGAAAGTAGACT  
GCAACTGTGGAGAATGTGTATTTCCAAGGCCGAGTCTACTTTGGGACCATCAGTAACCAGAGAGTTGTACC  
AAGAATGC

CCTCGCTGGTGACATCCTTGTCAATTTAGATATTTCTTCCGGAATCTTAGACTTCAATTGCTGCATATCAAAG  
GTTCCGTACCATTCAAAGTCACAGAACACACTCTGAAGTGAGTCCACCTAAATCTGCAGCCAGCAAAAC  
ACCACGTT

CAACAACAACAACACTACAGGAACAACAGTACTTAGCTTCTATGCAACAGCAGCAACAGGCAATGTCCAACAA  
TCCATTTGCCAAATCAGAACAGAGCTCAAGTTCACCAAAACGGAACCAACTAGTAGCAGCTTCTTCTCCAC  
AGCAACTG

CGTTGATTTTCATCAGCCTGTTTGGAGTACCCATGGATCCTCTGGTGAAACCTTGGTTGATCTTGGCGATGGAG  
ACACAGGCCTCTTCATGTCTCTCACATTTCAATCAGATATCTTGGGGACTCTGGAACATAAACATGCCAAC  
GATGATAA

TAGCTCCCTTCTTTGGTCTCATCAGAGTAACGGCTAGGAACACCAGGTTCAATAGCAACACGGTCACCAAC  
TTTGACCCTTGTGACGGCATCACCACCTTCCACAACCTGTCCGCTTGATTCATGACCTAAAACCATTGGCG  
CCTTCAAT

ACCCTCATAAATGTTGGTAAAATATTTCTTCAATGGCTCCAGCTTGACTACACCCACTTGCTTGCTCAAGG  
CTTGAACAGCGGCATCAAAGGCACCAGCGGCAACTAGGACAGCAGGCAGTTTAGAATTCTTGATCCAAATG  
GCTGTTTT

ACAAGCTCTCCATTAAGTCCATCAGGCTCCACCCAGAACATTCCACCAAGGTCTTGAACAACGGCGAAGA  
GGAGTTTCAATTTGTCACTACTGTGACGCTACTTTTCAGGATTAGAGGATATCTAACGAGACATATTAAGAAGC  
ACGCCATC

GTTAGTGGCCTGTCTTGCTGTCTTTACAGCGGTCATTAGATTGCATGGCTTGGCATGGCCTGCACAGCGTGG  
TGTTTTGATGAAGTACATTTCCGGTGGGTTTTGCCTCGCAATACATTAGGGGGACTTACTTCATGGATGTGCAT  
CCTCCTCT

CCACAGTAGTTATTTTTTTCTTAGATATTTCTTAAATACTGGGGTTGTGACTGACCAGGTGGCATCGCCATGA  
AATGTTTCTGCTGTGGAGGATACCCCTGCTGCGATGGCATTGCGGTGGAGGATACGCCTGTTGTTGCTGA  
TGCGAAGG

ACCACGATCTGATTGACGAGTTTGAATCTCAAGGTTTTGAAAAGGACAAGATTGTGGAAGTGTGAGACGA  
TTAGGCGTCAAGTCTTAGACCCCAATGACAACAACACAGCCAACCGTATCATCGAGGAATTGTTGAAGTG  
AATAGATA



ACCTTCCAAACGACACCATTGACCAACGGTAGAGTTCCAGCCTACGATGGTAGATTTGACCAAGGAGTGGT  
TCTTGATGGTGGAGTTGCACAAAACAACAGATCTGGTGATTCTAACACCATCACCGATGGTGACATTAGGA  
CCGATAAC

CCAGAGAATTAGCCATGCAGACTTTCAACGTTTTCAAGGATTTTGCCAGAGGAACAGAACTAAGAAGCGTC  
CTCTTGACTGGTGGTGATTCTTTGGAAGAACAATTTGGCATGATGATGACCAACCCAGACGTTATTATTGC  
AACACCTG

ATTATCTCTAGGTGTTGGTATGCAAGGTGACATGTTCCGGTATCGTTGTTCCAAGAAACACTACTGTTCCAA  
CCATCAAGAGAAGAACCTTTACTACATGTGCTGACAACCAAACCACCGTTCAATTCCCAGTCTACCAAGGT  
GAACGTGT

AGGAAGATAACCTCTTAGAAGCAGTAGTAACTGAGCCTGCCTTCGATGAACTTGAGACGGAAGATTGTACC  
GCTGACATGGGTGTGCTGGATGACGAAGATGTGTAAGTGTCTGTCTTATTAGAGTTGTTTTCAATACCGC  
ATTCCAC

CTAGATCGTACAAAGAATTGGTAGATCCTGATTTCCCAAGTGACAATGTTCTCCTCAGTGAAAGTCCTTCA  
TCGTGGTTATCGTCTACTTCTTGGTCATCGTCATCTTCTTCTCCTTTCGTCGCTACTATTGTATTGTGA  
GTCTTCAA

CATGTTCCGGTATCGTTGTTCCAAGAAACACTACTGTTCCAACCATCAAGAGAAGAACCTTTACTACATGTG  
CTGACAACCAAACCACCGTTCAATTCCCAGTCTACCAAGGTGAACGTGTTAACTGTAAAGAAAACACTTTG  
TTGGGTGA

ATAAGCTCAGAACTTCGCTGGATCGCACAAAGAGAAGAGATGCTTGCCAACCACCAACTGGACACAAGATAC  
TCCGTGGAAAGAGCACGTGCCTCGCTGGATCTGCCGGGTATCAATCATGCAGAGACGCTGCTCAGCCAGCG  
CAGCAGGG

CGCTTATTCGATGTCAAGAGTAGGGATCACCTTTCTGCGAAGTTGGAGCCCAAACCTAACGATTCAGCACAA  
TTGCCAAACAGGAAGATGGACAAGCATCCTCAAGGCCAGGTTCAAGCCGAACAAGAATGTTTTTGCAATAG  
CTAACATG

CGGTGAATTGCATTTGGAAATTTGTTTGCAAGATTTGGAACACGACCAGCTGGTGTTCATTGAAGATCT  
CCCCACCAGTTGTGCTTACAGAGAAACTGTTGAAAGTGAATCTTCTCAAACCTGCTTTGTCCAAGTCTCCA  
AACAGCA

GTGATGTTGGTGAGTACGATGGTGATGTTGGTGAGTACGCTGGAGAGGTAGGAGAGTATGTTGGGGAAGTT  
GGAGAAAAGCCTGGTGAGGAGACTCCAAATCCGGGAGATGTAGGTGCTTCACCATAAGCACCAAATGGAGA  
CGTGGCTT

AAGTACATTTCCGGTGGGTTTTGCCTCGCAATACATTAGGGGGACTTACTTTCATGGATGTGCATCCTCCTCTT  
GCAAAGATGTTGTATGCTGGTGTGGCATCGCTTGGTGGGTTCCAGGGTGATTTTACTTCGAAAATATTGG  
TGACAGCT

TCATTTTCTTTGCCGCCGATGGAATAGCCTTTCTTGGATTGGATTGTTCACTGGCAGTCATAGCCAGCTGT  
TCACTCATAACAAAGCGAACGCTGCTGTGACAAATGTGGCAACGACACCTTTGAACCTCTGGATGGGTGT  
ATCACCAC

GAGCATATTTCAACACCTGTTTGTAAAGTTGTAGGGAACGGTGAAACTCTTAGAATCAATCGTGGCACCC  
ACATCTCCTGTGGTAATTCTTGTGTTGTGCCTCTGGTGCAATGGTTATCATACTCGGATTAGCGGCTTTTGT  
ACCAATCA

CGGTGGTTCCAGAGGTGGCTTCGGTGGTAGAGGCGGTTCTCGTGGTGGTGCCCGTGGTGGTTCCAGAGGCG  
GCTTCGGTGGTAGAGGCGGTTCTCGTGGTGGTGCCCGTGGTGGCTCCAGAGGTGGTAGAGGTGGCGCTGT  
GGTGGTGC

GCCTGCACTATCAGTAGGAGGCTCGATATCAAGAGGGTCTTGTAGTCCAGAGCCACGTTCTCAAGACCTA  
CAGGTGAGTCTCTAAGTTTCGTGTGGAAAGCGCTACCTCCTTCATCAACAAGACACGTTTCATCCATATTT  
TGCAAGTA

GTAAGATCTTATGTGTCCATGGAGGGTTATCTCCCGAGATTAGAATGCTCGATCAAATCAGAGTCTTGTCA  
AGAGCTCAAGAAGTGCCACACGAGGGTGGGTTCTCGGACCTGCTTTGGTCAGACCCTGACAATGTAGAGGC  
TTGGCAAG

AAACCTCGGCGGCTATGTCTCGTACTAACATGGATACAAGACACGCACATTCTGCTTTACTGGCAGCACCA  
CAGAGTGCTACTGCAAATAGCAGGAGCAGCAACAGCAGCAGCGAGAGTAGTAGTAACAAAAACAATATCAA  
TGTCGGCG

TTGTGCGAGACGGATCGATTGACGCCGACGATTGCGCAGGCACCTGCACCTGCGCCTGCGCCTGCGTGTGCG  
GTGCTAATGTTCTTCAAACCTCCATACTGCCATACTGGGCTGGCGGTCTTGTTCATTGTCCCACAGGATCCT  
TTCAAATT

CGATGTCCGACTCAGAAGTCAATCAAGAAGCTAAGCCAGAGGTCAAGCCAGAAGTCAAGCCTGAGACTCAC  
ATCAATTTAAAGGTGTCCGATGGATCTTCAGAGATCTTCTTCAAGATCAAAAAGACCACTCCTTTAAGAAG  
GCTGATGG

ACGAAAAGGACTTGGAAGGTAAGGCCTTGTTGAAGGTTGTTATGAGAAAGTTCTTGCCAGCTGCCGATGCC  
TTATTGGAATGATTGTCTTGCACTTGCCATCTCCAGTCACTGCTCAAGCCTACAGAGCTGAACAATTATA  
CGAAGGTC

CGTCAGAGCTTCTTGTACGATACATAACCAGCAACACTTGATGAGGCATGTGGACCAACTGTTGTAGTAGAC  
TCAATTTAAAGATGTAGAGTCCGTGGAAGTGGAAATCACGACAGAGATATTTAGACTTGTTGAAGTAGTAAT  
ATCGTTTTG

TACCTACGAAATCTTGGACCCTCACGATTTCCGGTATGAAGAGGTATATCCACTTCGCCAACAGACTAACTG  
GCTGGAACGCCATCAAAGCCAGAGTCGACCAGTTGAACTTGAACCTTGACGGATGACCAAATCAAGGAAGTT  
ACTGCTAA

GGAAGGACTACTGAGTGTACAAGGTATGACCTGTGGGTCTTGTGTTTCTACAGTCACCAAACAAGTGGAAG  
GCATTGAGGGTGTGGAATCGGTAGTCGTTTCTTGGTAACGGAAGAGTGCCATGTTATTTATGAACCGTCC  
AAGACAAC

ACCATGGGCATGGAACGGTGGTGATGAAGAATTGAGAACCGTTGGTGTGTTGGACCGGCGTTGGCCATGGAC  
AACAAACCTGGTCTGTGCTGGTGCTTCTTGAAGTTTTTCATCTGGGAATTTGCCACCGTAGATAGACTTACC  
GCCGGTAC

GATGGTTGTGCTAGATCGTACAAAGAATTGGTAGATCCTGATTTCCCAAGTGACAATGTTCTCCTCAGTGA  
AAGTCCTTCATCGTGGTTATCGTCTACTTCTTGGTCATCGTCATCTTCTTCTCCTCCTCGTCTGCTACTAT  
TGTATTGT

TAACTATATTTAACGCTACAAATCTAACCTCATTGCTGCTGATTCTTGGAGTCCATCACAGATTCTTTG  
AACCTACAGAGTTTGACAATCTTGACTTCTGCTTCATTTGGGTCTTTACAGAGCGTTGATAGTATAAAACT  
GATTACTC

ACACAACATCTTGGCTTTGAGAAGGGCCAAGAGACGTAACATGGAAAGATTGCAATTGGTCACTGGCGGTG  
AAGCTCAGAATCTGTGGAAGACTTGTGCGCTCAGATTCTTGGGTTTTCTGGCTTGGTCTACCAAGAAACC  
ATAGGCGA

GAGTACGATGGTGATGTTGGTGAGTACGATGGTGATGTTGGTGAGTACGCTGGAGAGGTAGGAGAGTATGT  
TGGGGAAGTTGGAGAAAAGCCTGGTGAGGAGACTCAAATCCGGGAGATGTAGGTGCTTCACCATAAGCAC  
CAAATGGA

GAAATGATTGTTAGAGCCAGAATTTCTGACAGGTATTGTCCTGTCTGTTGTGCCAATTGCTGTTGCTGAG  
CCATCAACTGTTGCTGCTGTGCTTGAACCTGCTCCAACCTGCTTCTGCAAAGTGAATTGTTCAATCATCAA  
TTTGTCAA

GAGTAACTGGTATAAGAAACAATAATGCAAGACCAACCGTCTCTGTTGTTATTCGTGGTGCAAACAACATG  
ATCATTGATGAAACAGAGCGTTCCCTCCATGATGCACTATGTGTTATTCGTTGTCTAGTGAAAGAGAGAGG  
TTTAATCG

GGATTCTTTTATTTACGACGAAAATTCAGTCATACAGTTACACCAACCAGTAATGTCATCGCTTGAAGAAA  
TTCTCTTCTTCTTCAAGCTCCAACCTCAAACAACACTCTCTCTGGCTTTGATAAACTCGATCTATGATATG  
CTTGATTA

AAACTTAAGTGACTGGAATAATGGTTGGCAATTTTGTCTTGCTGGTTTTTCATGCCTGCTGTCTGGACTATTG  
GTTCTTTGATTCATGTGTCCATCAATCTGAAGAAGCCAAAGATGCCAAGAAATCAGTCCCCATTGGTATA  
ATCTCATC

ACTATCAAGCGAAGTGGTACTTGGATGACGTCATTGACGCAAATGAGGAAGAAGAGGCAGAACAGACCAAT  
GGAAAGGATGAGACAATGATGGAAATGATGATGAAATGATGGTGGAGCAAGACAATGAAGAGGTAGCAGG  
CGACGAAG

CCGGATACAAGAGCGCCAAGCGATAGCAATAAAGTAATAACAGAGATATTTGACGCTACTGAGGATGCCAA  
GGAGGCAGACGAAAGTGAAAGAGGAATGCCACTTGCACAGCATTGAATACATATCCAAGGCAGCAGCTT  
GGTCACTA

CTGCTGAACTTGAAGTATAACAGAGCTACTTAGATCAGCTGAACTTGAAGTACTACGGAAGTAGTTGGA  
TCAGCTGAAGTAGTTTGAACGGTCGAGGTAGTTGGGTGAGCTGAAGTAGTTGGGTCAACTGAAGTAGTTGG  
ATCAACTG

CATACATTCAATGAAGTACGCTGTTAGTTTCGTCCAACCTTTGCTGCATCAACCTGCAATGAGGAGCAGATCT  
CAACCACTGCATCTTCCAATGCCTCAGCATTGACTTTATGTAATTTTTCAAATGACATTACTGTGTATCTA  
TGATTCTGA

ATTGGTTTTAGAAACACGTTTTCGAATCTTCAGTATGAGTTGACGGAGGTGTGGAATCGGTTGGACTCACAG  
CTTTTGAAGGACATTTCTCGGTTGCTCAGGATGTAGTTCAATGTTCGGATTGGAAGTCATGGTCAGATTCT  
ATGTTAAG

GTGAGTACGCTGGAGAGGTAGGAGAGTATGTTGGGGAAGTTGGAGAAAAGCCTGGTGAGGAGACTCCAAAT  
CCGGGAGATGTAGGTGCTTACCATAAGCACCAAATGGAGACGTGGCTTACCATAATCAGCACACCAGTA  
CGCTGTAA

GCCTGCACCTCTGGGACTGATTCCCCATCCGCTCTATCGTCAGGGTCTGACCATAGAAGGTCACACATAG  
GACCTTCATGAGGCACCTTCTGTATTCTGTTCAACTCTCTCACCTGATCTATGGTTTTCTATCATGGGGGAA  
AGTCCTCC

TGAACTGATAACAGAGCTACTTAGATCAGCTGAACTTGAAGTACTACGGAAGTAGTTGGATCAGCTGAAG  
TAGTTTGAACGGTCGAGGTAGTTGGGTGAGCTGAAGTAGTTGGGTCAACTGAAGTAGTTGGATCAACTGAA  
GTAGAACT

TGAAGTTACTGCCGCTTTACGTGTCACTGACGGTGCTTTGGTTGTCGTCGACACCATTGAAGGTGTCTGTG  
TCCAAACCGAACTGTTTTGAGACAAGCTTTGGGTGAGAGAATCAAGCCTGTTGTTGTTATCAACAAGGTC  
GACAGAGC

CTTACCAAAGACAACATGCTTACCGTCCAACCATGGGCATGGAACGGTGGTGATGAAGAATTGAGAACCG  
TTGGTGTGTTGGACCGGCTTGGCCATGGACAACAAACCTGGTCTGTCGTTGGTCTTCTTGAAGTTTTTCATC  
TGGGAATT

TCATTGACGCAAATGAGGAAGAAGAGGCAGAACAGACCAATGGAAAGGATGAGACAATGATGGAAATTGAT  
GATGAAATGATGGTGGAGCAAGACAATGAAGAGGTAGCAGGCGACGAAGAATATGACATAGAGGATAATGA  
AGGATTTG

TGGAGTGAAGTCGTTGACGATATTAACGTTCTTCTAATTTCTCGGGAGACCTTCCCCTGATCATTTTCAG  
CAACCACCTTGCAGCCAGCGTCAAGCAAGGGCTTGATGTTGAGGTAGTTTGCCGCCAGAATAATTTTCGTAT  
AGCATCTC

CGACTCTCCAGGTCACGTTGACTTCTCCTCTGAAGTTACTGCCGCTTTACGTGTCACTGACGGTGCTTTGG  
TTGTCGTGACACCATTGAAGGTGTCTGTGTCCAAACCGAAACTGTTTTGAGACAAGCTTTGGGTGAGAGA  
ATCAAGCC

GCTCTAGCTTCTTCAACACTAGCTTCAATAACTTCCAACCTCTTGTGAATGAATGGATGGTCTGGGGCAAC  
CTTGTTAACTTTGGAAAGAGATGCTCTTGCTTCGTCAATTTGACCAGCTTCAACCAAATAACGTGGGGATT  
CTGGAACG

CCTTGTTCCACAGACCTTACTTCCACGTTAGTGTTCATCGAAGATGTTGCTGGTATCTCCATCTGTGGTGCT  
TTGAAGAACGTTGTTGCCTTAGGTTGTGGTTTTCGTCAAGGTCTAGGCTGGGGTAACAACGCTTCTGTCTGC  
CATCCAAA

TTGCTGGTACCGGTGAATTGCATTTGGAAATTTGTTTGAAGATTTGGAACACGACCACGCTGGTGTTC  
TTGAAGATCTCCACCAGTTGTGCTTACAGAGAACTGTTGAAAGTGAATCTTCTCAAACGCTTTGTCTC  
CAAGTCTC

AGGTCATGGATGGTAAAGCAAACATTGAAGTTCGTCCAAGATTCGTCAACAAAGGTGAAATAGTCAAGAGA  
CTAGTCTGGCATCAACATGGCAAACCACAGGACATGTTGAAGGGAATCAGTAAAAACTACCTAAGGATGA  
AATGCCTG

TTTTTGCTGTATTGTTCCAGGCAGAGCGGTTATAATTCACCGGACTTGGCAACAACAATTCTAGCCTTGGT  
GGCACCGBAAGGAGAACCCAAGGACTCAACCTTCTTAACGATGTGTAACCGTCAACAACCTTACCAAAGA  
CAACATGC

CCACCGBAAGTACCGACTCCAACACTAGTGCTACTACCACCGBAAGTACCGACTCCAACACTAGTGCTACT  
ACCCTGCTAGCACCAACTCCAGCACTAATGCCACTACCCTGCTAGCACCAACTCCAGCACTAATGCCAC  
TACCCTG

ATTCTGTGGAGGTGGTACTGAAGCAGGTTGAGGAGAGGCATGATGGGGGTTCTCTGGAACAGCTGATGAAG  
CAGGTGTTGTTGTCTGTTGAGAGTTAGCCTTAGTGGAAGCCTTCTCACATTCTTCTGTTTTGGAAGCTGAA  
ACGTCTAA

CTGACTACGGAAGTAGTTGGATCAGCTGAAGTAGTTTGAACGGTCGAGGTAGTTGGGTGAGCTGAAGTAGT  
TGGGTCAACTGAAGTAGTTGGATCAACTGAAGTAGAAGTACTACTATAGAAGTACTAGTTGGGTCAACTGAAGTAG  
TTGGATCA

AGGACTAGTGCGATTACCACTGAAAGTACCAACTCCAGCACTAATGCTACTACCCTGCCAGCACCAACGT  
CAGGACTAGTGCTACTACCCTGCCAGCATCAACGTCAGGACTAGTGCGACTACCCTGAAAGTACCAACT  
CCAACACT

GCCTACAGAGGTGTTATTCAACCCCTTTTCCATACATTCAATGAAGTACGCTGTTAGTTTCGTCCAACCTTTG  
CTGCATCAACCTGCAATGAGGAGCAGATCTCAACCACTGCATCTTCCAATGCCTCAGCATTGACTTTATGT  
AAATTTTC

TTACGTTTTGTTCTTATATTTCCAGCTAGGGAGCCATCACGCCTTGTGTTGAGCAACAAGAAGAAGAGACCG  
ATGAAGTTATGAGCACCATTTCCAGGAATCCACATCACTCTTTGAGTGTCAAGTCATCATTGGTGATACTT  
CTAGGTAC

ACAGATAATGGCAACTTCAAACCCAAAGATTTAACCAAGTCAGAGGTTTGGTTGTCAACGTTCAAAACACC  
GTTAGAACGAGACAAGTCCAAAGCAGAGACTTCTGGGACGTATTGATCCTTTCTTTCTTTCTTTCTTTCTT  
GCAATTTG

TTTAGAATTCTTGATCCAAATGGCTGTTTTCAACTTCCTGTGCTGGAGAGGTAATTTTCGCCTTGCTCAACTT  
CTTCAGGTAACCTTTCTCCCACATCCAAATCTTCGTACCCCAAATCCCAGGCACCTTCGTCTTCACCAATA  
TCCTCATC

AATTATTTGGTGCTGAACATTCTCTTGTACAATGGCTTATCATCGTGAGCCATTTCTTCAGCGTCGTAGTT  
GGCACCTCTTCTAGATGGTGGAACCCATGAGGCAGACTTCCATGGTGAACACCTTCTTCCCACATGGTGT  
TGACTTCT

AAGTGCCACCAAGATTGAATCAACCACAATAGCATTTGTCAAGGAACTGCCTTGGGATCTACACACCATTG  
TACCTGTTTTCGAATGGTGCTATCATTGTGGGAACCAATGAACTGGCATTCTTAGATAATACTGGCGTTTTA  
CAATCGAC

CAAGAATCCAATGATCTTAACATAGAATCTGACCATGACTTCCAATCCGACATTGAACTACATCCTGAGCA  
ACCGAGAAATGTCCTTTCAAAGCTGTGAGTCCAACCGATTCCACACCTCCGTCAACTCATACTGAAGATT  
CGAAACGT

ACTAAGGTTAATTCTCAAGAAGAGACAACACCTGGGACATCAGCTGTTCCAGAGAACCATCATCATGTCTC  
TCCTCAACCTGCTTCAGTACCACCTCCACAGAATGGACAGTACCAACAGCACGGCATGATGACCCCAAACA  
AAGCTATG

CCAACTCCAGCACTAATGCTACTACCACTGCCAGCACCAACGTCAGGACTAGTGCTACTACCACTGCCAGC  
ATCAACGTCAGGACTAGTGCGATTACCACTGAAAGTACCAACTCCAGCACTAATGCTACTACCACTGCCAG  
CACCAACG

AAACGAGAACC GCAATACTGGCGCTGGCGTAGATGTAAATACAAATGCAAATGCAAATGCAAATGCAACTG  
CAAATGCAACTGCAAATGCAACTGCAAATGCAACTGCAGAGCTGAACTCCCCACGGTCGATGAGCAAAGA  
CAGTATAA

ATAGGACATTTATGGCTATCTGATAAGACTCCATACGATGACATGCGTTTATTGAGTTTGTATGTGGTGGC  
CACAAGCTCAACCTGGAGGAGTGCCTTTTCTAATCTGGTCTCATCCATCTTTGATGTGTGCTTCTTTAATA  
ATTGCGAC

TTTCTTCAGCGTCGTAGTTGGCACCTCTTCTGGATGGTGGAACCCATGAGGCAGACTTCCATGGTAGAACA  
CCTTCTTCCCACATGGTGTGACTTCTTCCAAAGTCAAACCCTTAGTTTCTGGAACAAC TAACAAAACATA  
GAAGAACA

TGATGACAAAGTAGAAGCAGTAGCTGACAACAAATCTAAAGGGGAGACGAAAGTTGCTGTGTCTCAAGAGG  
GATTGAAAGATGTTAGTGACCATGTTGGCCTCGCCAACAAGGATGAGAGCAAGGACGACGACGATGAT  
GACTGGGA

GAGTATGCTACAAGAATGACCGGCTGAAACGTCGGTGCCTAGACCAACCTTTATGCCCTGGTCCAGCAACC  
ATCGAACCTTACACTCTCCAGAAGTCAGAGAGGAGTTGGAAATGGGACAATGAGATATACCACAGCGACGC  
TGTTTTAAT

ATGATCTTAACATAGAATCTGACCATGACTTCCAATCCGACATTGAACTACATCCTGAGCAACCGAGAAAT  
GTCCTTTCAAAGCTGTGAGTCCAACCGATTCCACACCTCCGTCAACTCATACTGAAGATTCGAAACGTGT  
TTCTAAAA

AACTTCGCTGGATCGCACAAGAGAAGAGATGCTTGCCAACCACCAACTGGACACAAGATACTCCGTGGAAA  
GAGCACGTGCCTCGCTGGATCTGCCGGGTATCAATCATGCAGAGACGCTGCTCAGCCAGCGCAGCAGGGAC  
CGTTAATG

GTCACTGCCGGAGACAATCAATGGTAAAGTTGGATGGAAAGAGGCCAGTTGACACCTCTTGTGTGACCCT  
CTAGAATAAACTTGACAACACAGTCACCAAGAGAGCCATCCAATAGATTTTGTGTGCACTCATTGCTCC  
TCAAATGA

AAAGCGCTAATTGACGTATTGCCAGTATTGCCTGTATTGGTACCAAACCTGGGGCATTCCAAATGCTGAAGT  
GGTGGTTCCCTCCTGTCTATTGTGTTTGTCTGTTCCAAAACCTAGGTCTTCCAAATGCACTTCCCTCCCATGTTAT  
TGGTACTA

GATAAATCAATAGTCAATATGCCTCCAAAGTTTGTATCCAAATGAAGTTAAGTACTTGTACTTGAGAGCTGT  
CGGTGGTGAAGTCGGTGCTTCCGCCGCTTGGCTCCAAAGATCGGTCCATTGGGTTTATCCCCAAAGAAGG  
TTGGTGAA

AATATTTCTTCAATGGCTCCAGCTTGACTACACCCACTTGCTTGTCTCAAGGCTTGAACAGCGGCATCAAAG  
GCACCAGCGCAACTAGGACAGCAGGCAGTTTAGAATTCTTGATCCAAATGGCTGTTTCAACTTCCCTGTGC  
TGGAGAGG

CTTAGAATGATTGTGTGTCAGAGAAAGTAGCTAGATCTGTTGAAGTAGTTGGACCACTTGGTCTGGTTGAATA  
AACTGAGGTTGAACTGACAATAAAACTGGTTGGTTTCAGATGAAGTTGAACTAACTACAGAACTAGCTGGAT  
CAATTGAG

GAGACAACACCTGGGACATCAGCTGTTCCAGAGAACCATCATCATGTCTCTCCTCAACCTGCTTCAGTACC  
ACCTCCACAGAATGGACAGTACCAACAGCACGGCATGATGACCCCAAACAAAGCTATGGCCTCTAACTGGG  
CACATTAC

AAAAGGCGGCAGTTCCTAAGGGAACCTTCTGACTATCAAGCGAAGTGGTACTTGGATGACGTCATTGACGCA  
AATGAGGAAGAAGAGGCAGAACAGACCAATGGAAAGGATGAGACAATGATGGAAATTGATGATGAAATGAT  
GGTGGAGC

ATCTGTTGATGTGGTTACCTCGTCAGAGCTTCTTGTACGATACATACCAGCAACACTTGATGAGGCATGTG  
GACCAACTGTTGTAGTAGACTCAATTAAGATGTAGAGTCCGTGGAAGTGGAAATCACGACAGAGATATTT  
AGACTTGT

TTTGTGTTGCAAGATTTGGAACACGACCAGCTGGTGTTCATTGAAGATCTCCCCACCAGTTGTGCTTAC  
AGAGAAACTGTTGAAAGTGAATCTTCTCAAACCTGCTTTGTCCAAGTCTCAAACAAGCATAACAGAATCTA  
CTTGAAGG

CAACGAGTGCAGCAACAAAGGGTACAACAACAACAACAACAACAGCAGCAGCAGCAGCAACAGCAGCAACA  
GCAACAGCAACAGCAACAGCAACGCCAGGGTCAAACCAAAGAAAGATTTCTAGTTCTAATTCTACTGAAA  
TACCCTCT

GGACCCACACTATCCGCTGCCACAGTATATCCCACCGCTGAGTACTTCCCTCACCTGATCCAATCGATTAC  
AGGATCAACACTCTGAAGTACCTCAAGCTAAGACAAAGGTGAGAAATAATGTCTTACCACCACACTTTA  
ACATCAGA

CGATAGCAATAAAGTAATAACAGAGATATTTGACGCTACTGAGGATGCCAAGGAGGCAGACGAAAGTGAAA  
GAGGAATGCCACTTGCAGACAGCATTGAATACATATCCAAGGCAGCAGCTTGGTCACTATTGGTCTCTACA  
ACTTTAAT

TTAGATCTTGCAATTCCTGTTCCCTGGATAGCGAACAAATCCTCTGGATTGTTTTCTCAAAGGGGTCCACC  
AAAGTCACATTGGTGGGGATTTGTACTTGATTTTGTGTTTCTGTTTCTATTTGCCCTTTGTTTCTGATTG  
TTGCGATA

TCAGTAGGAGGCTCGATATCAAGAGGGTTCTTGTAGTCCAGAGCCACGTTCTCAAGACCTACAGGTGAGTC  
CTCTAAGTTTTCGTGTGGAAAGCGCTACCTCCTTCATCAACAAGACACGTTTCATCCATATTTTGAAGTAGC  
GTGACCAG

TCACCCCATCTTTTCGTTGCTTTCACTCCAGAAGAAAGATTGATTGGTGATGCTGCCAAGAACCAAGCTGCT  
TTGAACCCAAGAAACTGTCTTCGATGCTAAGCGTTTGATTGGTAGAAGATTCGACGACGAATCTGTTCA  
AAAGGACA

GGTACTATTGTGGCTGTTGGATGATGAGAAATCTAATTTGGCTGCATCTTCATGATTCATTTTCATCAAGC  
ATGCCACCATCACGGCCCCACTTTCTCCACTACCAACATTTCTGTAGATTGCTTCTTACCTTTTGTATC  
CCTCAATT

TAAAGTCCTTGTGAACTTTGCATCATTACTCCTTGCCTTCGGAACGTGAGGTGGAAGACTCCACACTGCA  
ACAGCATCGAAAGTATTAACCTTCGGAGATCTCACCATAAGGTGAATCCAGGAATGGCGATATGATATCGGT  
GGTTATTG

CCATCTGCCGCACTATGGAGGGTGATTCAACGGAAAAGGCGCAGGAAGTGCAGTAGTGACCGGCAAGCAGC  
ATGTTGAAAGACATTGTTGGGAAATCCTGTTTGAGTCTGGTGTGTCTTCATTCTCCTACCATTTGTAGCT  
GGCGTAGA

CTGATGGAGAGAACGTCAAGAGACGTGTTCCCTTTGGACCTAACTGCTGCCAGAAATGCCAGAATTGAGCAA  
AACCAACGGACTTTGGCTGTAATGAATTTCCACATGAGGACGTTGAAGCTTCCCAAATTCCTGAATTGCA  
GGAGAACT

TGGTTCAAATACATCTATCCAATAATCTTGCTCAAAATTAACCTTTGTCAACTCGGATGTTCAAATGCTTAG  
CGACACGGTTCACATCTCTCCAATCCCTCTCGTAGCATGGCTCCTTGCCAGGGTCGTCCAAAGATTGTGAT  
TCAGACCA

AGAAATTACGGCCTAGATTTGATTAGAGGTAAAATTTGTGGACGAGATTCACGCTGGTGTCTTTGAGCCAAC  
CATAAGCAAAGTCAAATCCTTGAAATCAGCATTGGAGGCTTGTGTAGCAATTCTAAGAATTGATACAATGA  
TTACAGTG

CACACTACCCCTAACACTACCCTATTCTAACCTGATTTTACCTGTCTCCAAACCTACCCTCACATTACCC  
TACCTCCCCACTCGTTACCCTGCCCACTCAACCATCCACTCCCAACCACCATCCATCTCTCTACTTACCA  
CTAACCAC

AATGACTTACGTGTTCTGAGTCTGACCAAGGCACTAGTACAGAAGAAGAGGATGAAGTAGATGAAGAGCA  
AGTCCAGGCGTATGCTCCACAGATTAGTGATGGATTGGATGGAGACCACCAGCTAAATTCTGTAACGAGCA  
AAGAAAAT

ATTGCGTCAAATGAGATCCAAGAATCCAATGATCTTAACATAGAATCTGACCATGACTTCCAATCCGACAT  
TGAACATACCTGAGCAACCGAGAAATGTCCTTTCAAAGCTGTGAGTCCAACCGATTCCACACCTCCGT  
CAACTCAT

AACCTTCCATCCGCTAATGTTATCTTAGGTTTGTGTCTGTCATTTATGCTTTCTTTCTGTGGTGTACACA  
ACCTGTCTCATTGATGCCTGGCTTCTGGACATTCATGTGGAAGGCTTCCCATAACATATTTTGTTCAGA  
ATCTGGTC

CATTTGGAAATTTGTTTGAAGATTTGGAACACGACCACGCTGGTGTTCATTGAAGATCTCCCCACCAGT  
TGTCGCTTACAGAGAACTGTTGAAAGTGAATCTTCTCAAAGTCTTTGTCCAAGTCTCCAAACAAGCATA  
ACAGAATC

TATTCTAGGATCCTTCATGTTGAGTTAATCGGTTATACTTCTGTGCTGTGGCAAACCTGATGTATGCGCCA  
ACTTGAGACCATTGTCTCCACATTACAGAGGTGCTTCTAAGTCATCTGTTTCTAAACACTTTAGCTTTCTA  
TAATATTC

AATCCGTATTCTCTCTTCGTTCTTTAAAGTTTGTGGTGAGAATCCTCAAGTGGTAATTCACACTGTCTCC  
CTTGCATTTATTGGCTGGTTTGGAGAGTTAGGCACATCCTCATCAAAGATATTTGTCAAAGTCATCGCTCT  
CTTTGCAG

CAACTACTGAACCGATTCAATTGAAGAATAAACACGACCTTCACCTTAGGCCAGGAACTTACTGAATCTAC  
GGTGAATCACACTAATCATTCTGATGATGAACTCCCTGGACACCTCCTTCTCGATT CAGGAGCATCACGAA  
CCCTTATA

TTAATGCTCTCTTATGCTTGTTCTTCTTTGCAATTTCAATTTGTCTCTTGAATGAGGATTTGGTGGTGTCC  
AGGAATGCAACCTCCAGAAGTTTAACTTCTTCTTCTTTTCCCTCAGGATTAACCTTCATCCAATAAAATAGA  
AATAGATG

AAAGCGTTACGCCACTGCTTCTGCTATTGCTGCTACTGCTGTTGCTTCTTTGGTCTTGGCCAGAGGT CACA  
GAGTCGAAAAGATTCCAGAAATCCCATTGGTTGTCTCCACTGACTTGGAATCTATTCAAAGACCAAGGAA  
GCTGTTGC

GCAGAATATACCGCCACGGTTTATCCACAACAAGTGCCATTTCCAGGTCAACCACAGGGGGGTCAATTT C  
CACAGCCTTCATCAGAACAGCAGGTGTTTAAACCAGCTTCCACAAGTACTCAAACCTTTT CACA ACTCTGCG  
CAGAATAC

GTTGCTGCTGTGCTTGAACCTTGCTCCAACCTGCTTCTGCAAAGTGAATTGTTCAATCATCAAATTTGTCAAC  
TCACTTTGGGAACGTCTGTGTGCAACATGAATCTGCTTTGGGGCGTTTTTACCACCTCCTGTGGTTTGCAC  
AAACATGT

CATGGAGGATGGGTGACAAGGACAAACATTGGAATTACGATGTGTTCAATGCTCTGGGGCTGGAACACAAG  
CTTATT CAGCGTGTGGGGAACATTGCGAGGGAAGAAAGCGTTATTCTGAAGGAACTAGCTAAGCTCGAATC  
ACATCCTA

CCAAAGACTTTGGTGAAGAACTCAGGATTCGACCCATTGGACGTGCTCGCAATGGTGGAGGACGAGTTGGA  
TGACGCTCAGGATTCTGACGAAACGAGATATGTTGGTGTGGACTTGAACATAGGTGATTCTTGCGACCCTA  
CCATCGAG

ATATTGGTTTTAGAAACACGTTTTCGAATCTTCAGTATGAGTTGACGGAGGTGTGGAATCGGTTGGACTCAC  
AGCTTTTTGAAAGGACATTTCTCGGTTGCTCAGGATGTAGTTCAATGTCCGATTGGAAGTCATGGTCAGATT  
CTATGTTA

GTATCTTGGCTGGTTGAAGTGGTTGAAACCCTTAGAATGATTGTGT CAGAGAAAGTAGCTAGATCTGTTGA  
AGTAGTTGGACCACTTGGTCTGGTTGAATAAACTGAGGTTGAACTGACAATAAACTGGTTGGTT CAGATG  
AAGTTGAA

TCCGCAAAACAGTCAAGTCCAGGCAGCTCAACTCCATAATATTGCCATTATCAGCTGCCACAAGTACTCTC  
TCTTGATCTTGACGCTGCTTGTTTCAATTACAGCCACCCTGGGTGCTGAAAGTAGTGTCTTGCCACCAT  
ATTTGCT

GACACCGTCTTCAATCTTGTATGTAATGATAGATCTAGATCCATCTGCATTCTCTATGATCTCCTCTGGTG  
CAACTTCACTCATTATTCCTGGTGGTCTTTGGTCTTTTGATCCTTTCAATACAGCGAGTAACTAGGGCTTC  
TCTTCCCT

TGATCTTTTCCGCCCCAGTTTCTAATTAATCTTTT CAGTCTCTGAATCTGTTT CAGCTGCTGAGGGGAGAC  
AGGTGTGGATGTCATCGAATCAATATCTTCAAGAGACTCTGGAGATATATCGTCAAATAAAAGTTTGAATT  
CCGTATGG

CTTAGTCTCCCTAGAATAGAGGTTCTTAGCGAACAAATAACCGAATAGAGTAGCTGAAGAGGCGATGACAG  
AGTATTTTAAACCACTGGCTGCTGCTGTGCGGTGCTGCCTGTGCCTGTTGAGGCGTATCTGTAGCATGATCTT  
CTCACCAG

TAGAAACACGTTTTCGAATCTTCAGTATGAGTTGACGGAGGTGTGGAATCGGTTGGACTCACAGCTTTTGAA  
AGGACATTTCTCGGTTGCTCAGGATGTAGTTCAATGTCCGATTGGAAGTCATGGTCAGATTCTATGTTAAG  
ATCATTGG



ACCGATTCAATTGAAGAATAAACACGACCTTCACCTTAGGCCAGGAACTTACTGAATCTACGGTGAATCAC  
ACTAATCATTCTGATGATGAACTCCCTGGACACCTCCTTCTCGATTGAGGAGCATCACGAACCCTTATAAG  
ATCTGCTC

AGAATCCAATGATCTTAACATAGAATCTGACCATGACTTCCAATCCGACATTGAACTACATCCTGAGCAAC  
CGAGAAATGTCCTTTCAAAGCTGTGAGTCCAACCGATTCCACACCTCCGTCAACTCATACTGAAGATTCCG  
AAACGTGT

GCCTCGCAATACATTAGGGGGACTTACTTTCATGGATGTGCATCCTCCTCTTGCAAAGATGTTGTATGCTGG  
TGTGGCATCGCTTGGTGGGTTCCAGGGTGATTTTGACTTCGAAAATATTGGTGACAGCTTTCATCTACGA  
CGCCATAC

GTCTGAGCAACTTCTGAATTCATTGAAATTGATGAGCTTTGACTCCACACTGCGAGAAGTTGAAGTAGAGA  
AGACATCTGATAATGATAGAAAACAAGGAGTCTGGAGATCTCCAAATAGCAAGAAAGAAGGTCACATCAAAT  
GTTATGCG

CGTCAGGACTAGTGCTACTACCACTGCCAGCATCAACGTCAGGACTAGTGCGATTACCACTGAAAGTACCA  
ACTCCAGCACTAATGCTACTACCACTGCCAGCACCAACGTCAGGACTAGTGCTACTACCACTGCCAGCATC  
AACGTCAG

GACGCCGACGATTGCGCAGGCACCTGCACCTGCGCCTGCGCCTGCGTGTGCGGTGCTAATGTTCTTCAA  
ACTCCATACTGCCATACCTGGGCTGGCGGTCTTGTATTGTCCACAGGATCCTTTCAACTTCGACGGAAATTC  
GATCAGGC

TGTCTTGCTGTCTTTACAGCGGTCATTAGATTGCATGGCTTGGCATGGCCTGACAGCGTGGTGTGTTGATGA  
AGTACATTTGCGTGGGTTTGCCTCGCAATACATTAGGGGGACTTACTTTCATGGATGTGCATCCTCCTCTTG  
CAAAGATG

TTCCCTTGCGGCGACACCTTGGCATGGCTCCGCTTGTTCCGGTAGGCTCTGGCTTAGATTCTCCAGAACCCT  
CAGCAGGTGCTTACCAGGCTCGACCTGAGCTAACTCCTCACCAACAGTGACAGTGTCTCTGGTTTTGAAA  
TTTAGCTT

CTGCTGTGGGTACGGCCATTCTGTGGAGGTGGTACTGAAGCAGGTTGAGGAGAGGCATGATGGGGGTTCT  
CTGGAACAGCTGATGAAGCAGGTGTTGTTGTCTGTTGAGAGTTAGCCTTAGTGGAAGCCTTATCATATTCT  
TGAATTTT

TTGGAATCCTACGTTGCCTCCATCGAACAACTGTCACTGACCCAGTCTTGTCTTCTAAATTGAAGAGAGG  
TTCCAAGTCCAAGATTGAAGCTGCTTTGTCCGATGCTTTGGCTGCTTTGCAAATCGAAGACCCATCTGCTG  
ATGAATTG

GACTCCAACACTAGTGCTACTACCACTGCTAGCACCAACTCCAGCACTAATGCCACTACCACTGCTAGCAC  
CAACTCCAGCACTAATGCCACTACCACTGAAAGTACCAACGCTAGTGCCAAGGAGGACGCCAATAAAGATG  
GCAATGCT

TGTACGCTCCACCTGGAGCACAATCACAGTTTACACAATATCCACAATATGTTGGAACACATTTGAACACC  
CCGTCACCTGAGTCAGGTAATTCATTTCTGATTATCCTCAGCAAAGTCTAATATGACATCCACTAATCA  
ACATGTCA

GCTCATTTAACCGATCCTCAGCAAGTCCTGGAGACTTTAGGTTTACTTGTGGTGATGTCTCTCTCTTCCA  
AAGTGCTGGTACGGTCGACCTGGATTCCAGAGGTCATGTCAAGAATAGTGAGAGCAGTTTGAAATCAAAGC  
TAGCATCT

GTTCCAAGTCCAAGATTGAAGCTGCTTTGTCCGATGCTTTGGCTGCTTTGCAAATCGAAGACCCATCTGCT  
GATGAATTGAGAAAGGCTGAAGTTGGTTTTGAAGAGAGTTGTACCAAGGCCATGTCTTCTCGTTAAGACTG  
CATTATC

CCTCCCACGGTGCAGCAGCAATCACCTTCCGTTATTAGGCAGTCTCCCACTCAACGGCGGAAAACGTCTAC  
CACATCTTCCACATCTCGTGCACCACCACCTACAAATCCAGATGCCTCTTCTTCTTCATCATCTTTTGCTG  
TACCGACA

AATGCAAAGGTTTTCACTAGTCACTCACAGATCATTCTCTCACTCCTGTGTGAAGCCCAAATCTGCATGCT  
CTTTGGTCAAACCAGTTCATCACTTGGTGAAAATTGATAAGTCAAAGTTATCCCCTAGATTTCCAGAATTG  
AAATATGA

AGGGTGCAAAACTATGATCGATTATTTTGAAAGTAAAGGAGCTCACAAATGTCCACCTGATGCAAACCCTG  
CCGAATGGATGTTAGAGGTTGTAGGTGCCGCTCCTGGTTCTCACGCTACGCAAGATTATAATGAAGTCTGG  
AGAAACTC

GGCACCAGCGGCAACTAGGACAGCAGGCAGTTTAGAATTCTTGATCCAAATGGCTGTTTTCAACTTCCTGTG  
CTGGAGAGGTAATTTGCCTTGCTCAACTTCTTCAGGTAACTCTTCTCCACATCCAAATCTTCGTCAACC  
AAATCCCA

ACGTCACTTGAGCTAGTTGGATCTGTTGATGTGGTTACCTCGTCAGAGCTTCTTGTACGATACATAACCAGC  
AACACTTGATGAGGCATGTGGACCAACTGTTGTAGTAGACTCAATTAAGATGTAGAGTCCGTGGAAGTGG  
AAATCAG

TCTATCCATTTGCTTGAATACCTAGCTTGTTAAGGTGATCAATGATCGATTGACCGTGTGGACCTTGAAC  
CTGCACCTCAGCACATTTGAATGTTTGTGATTCACTTATTGTTGTGATCCGCTACAAATCTTCTTAAGT  
CAGCCGCA

GGCTATGTCTCGTACTAACATGGATACAAGACACGCACATTCTGCTTTACTGGCAGCACCACAGAGTGCTA  
CTGCAAATAGCAGGAGCAGCAACAGCAGCAGCGAGAGTAGTAGTAACAAAAACAATATCAATGTGGCGTC  
GGTGACGA

TTGTGTATATTATATGGTAAGGGTGATATTTAAGGAAGAAATCCACCCTTCTTTAAGGTTTTCCACTGCACA  
TGTTGAAATGTGTCTGAATCTTGATGAGCCCAAAGGCGTGCCACCATAACCATCTGGTCACTATTACCAAGA  
CGTTGAAT

CGGTTACTTCTAAAGAAGTCCAAACAACCTCAAGATCCGTTAGACATTTTCACTTCCAAAACAGAAGAATGT  
GAGAAGGTTTTCACTCAGGCTAATTCTCAACAGCCAACAACACCTCCCTCAGCTGCTGTTCCAGAGAACCA  
TCATCATG

TCGCAATAATCACACTAGCTACCATTCTTCATCGAATTCGGAGTCAAACATGGAAAGTCCCTCGCTTGTGAG  
ATGGTGAGTCTTCCACTCCGACCTCTATTGAAGAGTTAAACCCAACAATAAATAATTCGAGGCTGGTGAAG  
AGAAACTA

TCTTTGTTCTTCCATATGAGAACGCCTGCGAGTATTCGAATTTGCTTCTGTTTTCCACAGGAACATTGAAGT  
TGGTCACATTATTAGCATCCATTTCACTGTCAAAGCCATCTGCATCTGCATCAAATTCATCGTCGTCGATG  
TTATCGTA

TAAATTCACGTCTTTCTTCTTTCATTGATGGTATGTGTAGTACCTGTTGGGAGCCAGCAACAATAATCTTG  
GCTTGAGTACCCTTACCCTTGTGCTGTAGTCTGTGGCAGCAGTGGAAACAATAGGGGTTGAGTTAGGTG  
TACGTTGA

TTTATAATATTCTCCTTCATGGTACCGTAACGGTAGGCGTTGGTTCCTGAACAAGAATTAGCAATGCAACC  
ACCAATCTGTGCACCTGGACCAGGGTCACAGCCAAACATCAAACCGTGGTCGCTCAAATAGTCATTCAAAT  
CCTCCAG

TCAATTCACAGTCTACCAAGGTGAACGTGTTAACTGTAAAGAAAACACTTTGTTGGGTGAATTCGACTTGA  
AGAACATCCAATGATGCCAGCTGGTGAACAGTCTTGGAAAGCTATCTTCGAAGTTGATGCTAACGGTATC  
TTGAAGGT

TTCGCTACTGTTCCAAC TGGTGGTGCTTCTTCTGCTGCTGCCGGT GCTGCCGGT GCTGCTGCCGGTGGTGA  
TGCTGCTGAAGAAGAAAAGGAAGAAGAAGCTAAGGAAGAATCTGATGATGACATGGGTTTTGGTTTTATTCTG  
ATTAAGGA

AGAAAGGTTCCATATGTTGGTATCCATTCCACCGTTTTCAAAGATTTCTTGCTAAAGCCAGA ACTATCAAGA  
GCCATCATTGACTGTGGTTTTGAACATCCTTCTGAGGTCCAGCAACATACCATTCCCTCAGTCAATTCATGG  
TACCGATG

TATGGCTATCTGATAAGACTCCATACGATGACATGCGTT CATTGAGTTTGTATGTGGTGGCCACAAGCTCA  
ACCTGGAGGAGTGCCTTTTCTAATCTGGTCTCATCCATCTTTGATGTGTGCTTCTTTAATAATTGCGACAC  
CACCTAC

TATTTTTAAACCAGCAGGAGATCATCTGGAAGGTGTTGATACTGGACATCAAGAGCACTGCTACCATATCTT  
CTGTTCTCAGAGTCAATGACCTGCTGAAAGCTGGTATCACCGTT CATTCTTGATTAACAAGACAGATCT  
CCCTTGCC

ACTTCGCCAACAGACTAACTGGCTGGAACGCCATCAAAGCCAGAGTCGACCAGTTGAACTTGA ACTTGACG  
GATGACCAAATCAAGGAAGTTACTGCTAAGATTAAGAAGCTGGGTGATGTCAGATCGCTGAATATCGATGA  
TGTTGACT

GTTGAAGACTGGTACTTTGACCACCAGTGAAACTGCTCACAACATGAAGGTCATGAAATTTCTGTCTCTC  
CAGTTGTGCAAGTCGCTGTGCAAGTCAAGAACGCTAACGACTTACCAA AATTGGTCAAGGTTTGAAGAGA  
TTGTCCAA

TGGGGGTCTGCTGTTACTTTTTATCGGCACAACGGACCTGGGTTGACAAGAGCTTGAAGGCTCCAAGAGACA  
GCGACCGTCGGCGCCGAATGACGAAACTATGCTGTGTGTGACCAGGCGAACAACATTGAGAGAGTTGAGGA  
GCCGTACG

AGGACCATTGCTTTATAGTCAATTTTGGTATCATCACCCAATGTGTTCTCTCCCACTGCTTT CAGTCTGCG  
GAGGGACTCATCTTGAGTAAGACCTTCAGTCAGACTTGTGCCTATAAATTCAGCGGCTTCTTCTGTAGTCA  
ATGTGTGA

CCACATAACGGACGTACGAATCGTTTGAGCATTGAAACTTTTTCTGTGTAGACTCTAGCTCCCTGAGGAATG  
TACCACGACCTGTGGTAGGAATGATCACGAAAGGGAACATGATTGGTTGTTAAATTTCTAGTGT CATCAAT  
CAATCCAG

GACTGGAATAATGGTTGGCAATTTTGTCTTGCTGGTTTTCATGCCTGCTGTCTGGACTATTGGTTCC TTTGA  
TTCATGTGTCCATCAATCTGAAGAAGCCAAAGATGCCAAGAAATCAGTCCCCATTGGTATAATCTCATCTA  
TTGCTGTT

CAACCAACGGTACCACCTT CAGCTTTCCACCAACTACATCTTTGCCACCAAGCAACACTACCACCACTCCT  
CCTTACAACCCATCTACTGACTACCACTGACTACACTGTAGTCACTGAATATACTACTTACTGTCCAGA  
ACCAACCA

CGTCAAACACCGCTCAGGTAGCTTCATCGAACCCCTATGCTCCACCACCACAACAAAGAGTAGCAACCCCA  
TTATCTGGAGGCGTGCCTCCAGCTCCGTTGCCAAAGGCCTCTAATCCATATGCTCCA ACTGCAACCACTCA  
ACCCAACG

AACACTAGTGCTACTACCACCGAAAGTACCGACTCCAACACTAGTGCTACTACC ACTGCTAGCACCAACTC  
CAGCACTAATGCCACTACC ACTGCTAGCACCAACTCCAGCACTAATGCCACTACC ACTGAAAGTACCAACG  
CTAGTGCC

CCCGTCCCATACTTCTCATCCAGCCACTCTCTCAGCTTGCCGA ACTTGACGAACTTGTTGCAACCGATATC  
TGGATTGGGTGTCGACCCTTCACTGTAGCCTCTCAACATTGGTTCAAATACATCTATCCAATAATCTTGCT  
CAAATTA

TTTGGATTTCTAGAACAAATCGATAAAAAATTCACGTAACTTTGCAGGACCTCTTCGATTCATTCACCT  
TCGAAAAGATTCACTCTCATGTGGGTGTCAGGACTGATCTGTTTGATAGGAATCCGTGAGAAGTATTGATT  
ACTGATTT

CCACTGCCAGCATCAACGTCAGGACTAGTGCGATTACCACTGAAAAGTACCAACTCCAGCACTAATGCTACT  
ACCACTGCCAGCACCAACGTCAGGACTAGTGCTACTACCACTGCCAGCATCAACGTCAGGACTAGTGCGAC  
TACCACTG

GGTGGTACTGAAGCAGGTTGAGGAGAGGCATGATGGGGTTCTCTGGAACAGCTGATGAAGCAGGTGTTGT  
TGTCTGTTGAGAGTTAGCCTTAGTGGAAGCCTTCTCACATTCTTCTGTTTTGGAAGCTGAAACGTCTAACG  
GATCTTGA

TGCCGTATCCACCTTATCAAATGTCACCTATGTACGCTCCACCTGGAGCACAATCACAGTTTACACAATAT  
CCACAATATGTTGGAACACATTTGAACACCCCGTCACCTGAGTCAGGTAATTCATTTCTGATTCATCCTC  
AGCAAAGT

CTGCCGATGCCTTATTGGAAATGATTGTCTTGCCTTGGCATCTCCAGTCACTGCTCAAGCCTACAGAGCT  
GAACAATTATACGAAGGTCCAGCTGACGATGCCAAGTGTATTGCTATCAAGAAGTGTGATCCAAAGGCTGA  
TTTGATGT

CATTATGCTTTTTGTTGCTCTTGTCTTGGAGAATATGCAGGAGATCCTGGGCTGTAGCCTGGAGATGTTGGG  
GAGTAAGAAGGTGAAGTAGGGCTATAGTTTGGAGAGGTGGGAGAGTAAGAAGGTGATGTTGGGAATAGGA  
TGGTGATG

CAGACTAACTGGCTGGAACGCCATCAAAGCCAGAGTCGACCAGTTGAACTTGAACCTGACGGATGACCAAA  
TCAAGGAAGTTACTGCTAAGATTAAGAAGCTGGGTGATGTCAGATCGCTGAATATCGATGATGTTGACTCT  
ATCATCAA

AAGTTCTTTCCATGAGGCTTCCCCTAGTTCTCTTTGGGCAAGGACACCGGCGTTGATTTTCATCAGCCTGTT  
TGAGTACCCATGGATCCTCTGGTGAAACCTTGTGATCTTGGCGATGGAGACACAGGCCTTTCATGTCTC  
TCACATTC

TGCTTGGAAATACCTAGCTTGTTAAGGTGATCAATGATCGATTGACCGTGTGGACCTTGAACCTGCACTTCA  
GCACATTTGAATGTTTGTGATTCATTATTGTTGTGATCCGCTACAAATCTTTCTTAAGTCAGCCGCAAG  
TGATTCTG

TGAACTTGAACCTGACTACGGAAGTAGTTGGATCAGCTGAAGTAGTTTGAACGGTCGAGGTAGTTGGGTGAG  
CTGAAGTAGTTGGGTCAACTGAAGTAGTTGGATCAACTGAAGTAGAACTGACTATAGAAGTACTGGGTCA  
ACTGAAGT

CGCTTGTTTCGGTAGGCTCTGGCTTAGATTCTCCAGAACCCTCAGCAGGTGCTTACCAGGCTCGACCTGAG  
CTAACTCCTCACCAACAGTGACAGTGTCTCTGTTTTGAAATTTAGCTTCGTAACAGTACCTGATACTGGC  
GAATTGAC

AAAGAAGAGAGGTTATTGGAATGCTAGCACGTTCCGTAATTATTGGTTTTCTTGGCTACTGTTCAAGATGAT  
AGGACGACCAAGACTGACGTCAAGCTTGCTGATCCTCACATGAACTTTATTAGAAAATTTGCCATTGAAGC  
GATTATAA

ATCCTCCTCCTCCTCCAGGTGAACACATGCACGGTCGCCCACCAATGCACCACCGTCAAGAAGGAGAAGTCA  
TCGAACACCAGATTGTTTGTGATGACCTTTCCATTGGACGTTCAAGAATCCGAGTTGAATGAAATCTTTGG  
TCCATTTG

GATCTTTTCATAAACAGTGACCGTATGTCCGGCACGGTTCAACATATCAGCACACGCTAAACCTGCTGGACC  
AGAACCAATGACACCCACTGTAAAGCCAGTGCCTGTAATTTGGTGGACAAGGCTTAATCCATCCTTCTTTGA  
AAGCATTG

CCAAAGGCGTGCCACCATAACCATCTGGTCACTATTACCAAGACGTTGAATATGTTTGCTCTTTCAAGTAAG  
GTCAATAAACGCTGTCCAGCACCAGCTTCGCCACAGTCAGCACATCCTTGCTCAATGTTCTTTGGCTGCAC  
CGTTATGT

ATGGCTATGACGATAACCATCCGCTTATTTCGATGTCAAGAGTAGGGATCACCTTTCTGCGAAGTTGGAGCCC  
AAACTAACGATTTCAGCACAATTGCCAAACAGGAAGATGGACAAGCATCCTCAAGGCCAGGTTCAAGCCGAA  
CAAGAATG

TACATCACTGAGGAACTAGGTATTCAATGTGGTGCTCTATCTGGTGCTAACATTGCCACCGAAGTCGCTCA  
AGAACACTGGTCTGAAACAACAGTTGCTTACCACATTCCAAAGGATTTTCAGAGGCGAGGGCAAGGACGTG  
ACCATAAG

GAAGTGCCACACGAGGGTGGGTTCTCGGACCTGCTTTGGTCAGACCCTGACAATGTAGAGGCTTGGCAAGT  
TTCCCCTCGTGGTGCAGGATGGCTCTTTGGCAGTAAAGTTGCTAGAGAGTTTAAACCACGTTAATGGACTGA  
ACCTTATT

TGCAGTCATCTTATCGCCTTCCAGAGAATTAGCCATGCAGACTTTCAACGTTTTTCAAGGATTTTGCCAGAG  
GAACAGAATAAGAAGCGTCTCTTGACTGGTGGTGATTCTTTGGAAGAACAATTTGGCATGATGATGACC  
AACCAGA

CATCGAACAACTGTCACTGACCCAGTCTTGTCTTCTAAATTGAAGAGAGGTTCCAAGTCCAAGATTGAAG  
CTGCTTTGTCCGATGCTTTGGCTGCTTTGCAAATCGAAGACCCATCTGCTGATGAATTGAGAAAGGCTGAA  
GTTGGTTT

TAAGGAAGAAATCCACCCTTCTTTAAGGTTTCCACTGCACATGTTGAAATGTGTCTGAATCTTGATGAGCC  
CAAAGGCGTGCCACCATAACCATCTGGTCACTATTACCAAGACGTTGAATATGTTTGCTCTTTCAAGTAAG  
TCAATAAA

TGGCTAAGTATGGATAAACACCATCACAAACCATAACCTAGTAGGACACAGAAATGGTGAATTTCTCTGGCT  
TCACCTGTTTTCCAAAATCAAAGCAACTTGGGAACGCTGCTTGTCTTCTGATTAGGTGATGATGAATACATGA  
AATTGCAA

GTAGTCAAGAATCGTTCCCACTCAATTGACGAGGCAATTTCGCAAAGACAGTTTTTCTCTTCTCGCCTCAGC  
TTCTTGAGAAAGCTCCTTCAAAGGTGGGTTTGAACCGCATTGGTTCAAGTCTTCATGAAGACCATCTAGAA  
GGAATTGG

TAGCTGAAGAGGCGATGACAGAGTATTTTAACTACTGGCTGCTGCTGTCGGTGCTGCCTGTGCCTGTTGAG  
GCGTATCTGTAGCATGATCTTCTCACCAGCCTTCTCTAGGTTGTGCAATAGGCTTTATTAGCCTTGTGCA  
AGTACGCT

AATACACGAGCGATGTCCGACTCAGAAGTCAATCAAGAAGCTAAGCCAGAGGTCAAGCCAGAAGTCAAGCC  
TGAGACTCACATCAATTTAAAGGTGTCCGATGGATCTTCAGAGATCTTCTTCAAGATCAAAAAGACCACTC  
CTTTAAGA

CCGTCAACAACCTTACCAAAGACAACATGCTTACCGTCCAACCATGGGCATGGAACGGTGGTGATGAAGAA  
TTGAGAACCCTTGGTGTGGTGGACCGGCTTGGCCATGGACAACAACCTGGTCTGTGCTGGTGCTTCTTGA  
AGTTTTCA

CAGACCTTACTTCCACGTTAGTGTTCATCGAAGATGTTGCTGGTATCTCCATCTGTGGTGCTTTGAAGAACG  
TTGTTGCCTTAGGTTGTGGTTTTCGTGCAAGGTCTAGGCTGGGGTAACAACGCTTCTGCTGCCATCCAAAGA  
GTCGGTTT

AGGAGAACCCAAGGACTCAACCTTCTTAAACGATGTCGTAACCGTCAACAACCTTACCAAAGACAACATGCT  
TACCGTCCAACCATGGGCATGGAACGGTGGTGATGAAGAATTGAGAACCCTTGGTGTGGTGGACCGGCTTG  
GCCATGGA

GGCCCAATTTTCCAACAGTACATCTGCTTCTTCCACCGATGTCACTTCTCCTCTTCCATCTCCACTTCT  
CTGGCTCAGTAACTATCACATCTTCTGAAGCTCCAGAATCCGACAACGGTACCAGCACAGCTGCACCAACT  
GAAACCTC

TACCATCTAAATGAACATCTTGTCTCTTAAACATTTGTTCTGAAACGGATTGGACATAACCACCATCATTG  
TTCTCAGCCATGCTGGTGTAAAGTGTGAATTTTCCACCGTCTCTTCTAGAGGAATAGTTGTTTGAGTAGA  
TTCCTGTA

AGCAAAAGACCGACGGTAACTCCTTCTTGATCAACTTGATCGACTCTCCAGGTCACGTTGACTTCTCCTCT  
GAAGTTACTGCCGCTTTACGTGTCACTGACGGTGTCTTGGTTGTCGTCGACACCATTGAAGGTGTCTGTGT  
CCAACCG

CTTTCACCAAGTTGGACCAAGTCTGGGGTTCCGAAACCGTTGCCTCCTCCAAGGTCGGTTACACTTTGCCA  
TCCCACATCATCTCCACTTCTGATGTCACCAGAATTATCAACTCTTCTGAAATCCAATCTGCTATCAGACC  
AGCTGGCC

TGGTTACGATAGTCCAAGAGGTGGTTATTCCAGAGGTGGCTATGGTGGTCCAAGAAATGATTACGGTCTC  
CAAGAGGTAGCTACGGTGGTTCAAGAGGTGGTTATGATGGTCCAAGAGGCGATTATGGTCTCCAAGAGAT  
GCATACAG

AGATGTAAATACAAATGCAAATGCAAATGCAAATGCAAATGCAAATGCAAATGCAAATGCAAATGCAAATG  
CAACTGCAGAGCTGAACCTCCCACGGTCGATGAGCAAAGACAGTATAAGGTACAACCTGCTATTGCATATC  
AACAGCAT

GCGAGCATTTAAATCGTCAATAAAGTCCTTGTGAACTTTGCATCATTACTCCTTGCCTTCGGAACGTGAG  
GTGGAAGACTCCACACTGCAACAGCATCGAAAGTATTAACCTTCGGAGATCTCACCATAAGGTGAATCCAGG  
AATGGCGA

TTGATCCAAATGGCTGTTTTCAACTTCTGTGCTGGAGAGGTAATTTTCGCCTTGCTCAACTTCTTTCAGGTAA  
CTCTTCTCCCACATCCAAATCTTCGTACCCCAAATCCCAGGCACCTTCGTCTTCCACCAATATCCTCATCGT  
TAAAGTTT

AATATAGCACCACAGTAACGTCCATCAGTGAAAGTTAACAAGCTGGACCATCCCAAGGTTCCATCAGACA  
TGCAGCCAGTCGTACCATGCTTTTAGGTGAGAATCCATATCCTTATGATACGCTTCAGGAACCATCATCA  
TAACAGCT

TAAACCCTTAGCAATAGCTTGTCTGATGGCGTAGACTTGAGAAACATGACCACCACAGTGACTCTAACTC  
TGATATCGATGTTGGAGAACTTGTCCAAACCAACCAACAATAATGGTTTCGTAGACCTTGAATCTTAGGATT  
TCTGGTTC

TGTTTCGCTCTCATCCATCTTACGTTCTGTGCAATTTCTTTAATTGTATCTTGAGGAGGACCAGTCGCAGT  
GTTGCCAGAGTACTTTTCTACGATCTGCAGACTTCGAACTTGTGTCCGTGTAGACACTAGGGTGCACAGCGT  
TCATACCG

GGTCAAGATAGTTCTGTCTTGAAGCAGTACGAATCGTCTCTTGGACGACTTTATCTGTCTCCACGTCGA  
CTGCGGCCGTGGCTTCATCAAGCACCAAAATCTTTGATGGAACCAACATTGCTCTTGAAGACATAATAAT  
TGTCTTTG

CCAACCTGATACTACTACTGAAGCTCCAACCACCGGTCTTCCAACCAACGGTACCACTTTCAGCTTTCCACC  
AACTACATCTTTGCCACCAAGCAACACTACCACCACTCCTCCTTACAACCCATCTACTGACTACACCACTG  
ACTACACT

CAGAGGTGGCTATGGTGGTCCAAGAAATGATTACGGTCTCCAAGAGGTAGCTACGGTGGTTCAAGAGGTG  
GTTATGATGGTCCAAGAGGCGATTATGGTCTCCAAGAGATGCATACAGAACCAGAGATGCTCCACGTGAA  
AGATCACC

ATTCTATAAATCATTTTCTTTGCCGCCGATGGAATAGCCTTTCTTGGATTGGATTGTTCACTGGCAGTCAT  
AGCCAGCTGTTCACTCATACCAAAGGCCAACGCTGCTGTGACAAATGTGGCAACGACACCTTTGAACCTCT  
GGATGGGT

TTGAATGAGTCAGGGTAACGAGTGGGGAGGTAGGGTAATGGAGGGTAATTTGAGAGACAGGTTGGTCAGGC  
TTGGCTTGTCTTAGTCTTAGGCTTAGGCTTCTCTCTGGTGTGGGTGTGTGGGTGTGTGGGTGTGGTGTGG  
TGTGGGTG

CATTTTCATTAACCTTGCATAATCTTCAAAGTACACATATCATCACGTTCTCTAGAGTCTCTGTAAGCATCG  
GATGAAGGATCTCTTGCACCAGCACGACGAGAAGGTGGAACATACTGCCCTGGGATGGAACCAGCTCCGCC  
AACTTGGC

TTCAAGCCATAAGATTCTTTTGGCCACCAAGATCAAGAGGTACAATCACTTGGATTGCTCCAGCTGGTGTAGT  
ACACTTTGGATGAGAAGATTTTGAAGTTGAATTTGATGGCAAGAAGTCTGATTTCACTCTTTACCATACT  
TGGCCTGT

GGTGTTCCTCAACTTTGCTGTGGAAGACTTGCAAAGAATTCTGAAAGTTGCGGAAGTCAAGCCCCAAGTTAA  
TCAAATTTGAGTTCAGTCCCTTCTTGCAGAATCAAACACCAGGGATCTACAAATTTTGCCAAGAATGATA  
TATTGGTA

AAGCGCTCGAGAAAGTTGGAGTTTTTTCAGCGTTTTGCGTTCATGACGAGCGCTGGACTGCAGGGTCCGCAG  
TACGTCAAGCTGCAGTTTAGCAGGCATCATCGACAGTTGAGGAGCAGATATGAATTAAGTCTAGGAATGCA  
CTTGCAG

TGCTTTGGAGAATATGCAGGAGATCCTGGGCTGTAGCCTGGAGATGTTGGGGAGTAAGAAGGTGAAGTAGG  
GCTATAGTTTGGAGAGGTGGGAGAGTAAGAAGGTGATGTTGGGGAATAGGATGGTGTATGTTGGAGAGTATG  
AAGCGAT

TACCACTGCTAGCACCAACTCCAGCACTAATGCCACTACCACTGCTAGCACCAACTCCAGCACTAATGCCA  
CTACCACTGAAAGTACCAACGCTAGTGCCAAGGAGGACGCCAATAAAGATGGCAATGCTGAGGATAATAGA  
TTCCATCC

ATTGAATTAGGTCTGGGCTGATGTTTACGCTAAGGCTTTGGAAGGTAAAGACTTGAAGGAAATCCTATCTG  
GTTTCCATAACGCTGGCCCTGTTGCTGGTGTGGTGTGCTTCTGGCGCTGCCGCTGCTGGTGGTGACGCT  
GCTGCTGA

GACCAGGTGGCATCGCCATGAAATGTTCTGCTGTGGAGGATACCCCTGCTGCGATGGCATTGCGGTGGA  
GGATACGCCTGTTGTTGCTGATGCGAAGGAGGAACCATGAATTGTGGATGATGTTGCTGCGGAGGAATAGC  
AAATTGTT

GATGTCGTAACCGTCAACAACCTTACCAAAGACAACATGCTTACCGTCCAACCATGGGCATGGAACGGTGG  
TGATGAAGAATTGAGAACCCTTGGTGTGGTGGACCGGCTTGGCCATGGACAACAAACCTGGTCTGTGCTGG  
TGCTTCTT

GCCAGGAACACGGTAGTACTTGGCCTAGGGACGACGAAAATGAGCGTCTCGAGGGCGTGAGTCAGGAACT  
CGGCAACAATGATGAGTCGCAGCACAAAGATCACTATCCAGCCACGCCTCTAAGGTGGAGCCACAGGATTA  
GGGACCAG

ACTGTCAGTACCCAGTCTTGTCTTCTAAATTGAAGAGAGGTTCCAAGTCCAAGATTGAAGCTGCTTTGTC  
CGATGCTTTGGCTGCTTTGCAAATCGAAGACCCATCTGCTGATGAATTGAGAAAGGCTGAAGTTGGTTTGA  
AGAGAGTT

CCACCAGTGAAACTGCTCACAACATGAAGGTCATGAAATTTCTGTCTCTCCAGTTGTGCAAGTCGCTGTC  
GAAGTCAAGAACGCTAACGACTTACCAAATTTGGTTCGAAGGTTTGAAGAGATTGTCCAAGTCTGATCCATG  
TGTCTTGA

CAAAGTAGACAAAGAGTTCATAATTGTGGCTTCATTACCACCACCAGTTCGGTGGAGACGAAACAACCAG  
CGACCTTACCATGCAAAGCACCCCTTAGCCCACAACCCACCGGTACGGTCCCAGAAAGCCTTCCATTGAGCA  
GGGAAGTT

ATGGTTGGCAATTTTGTCTTGCTGGTTTTATGCCTGCTGTCTGGACTATTGGTTCCTTTGATTCATGTGTC  
CATCAATCTGAAGAAGCCAAAGATGCCAAGAAATCAGTCCCCATTGGTATAATCTCATCTATTGCTGTTTTG  
TTGGATTT

AGATTCCAGAAATCCATTGGTTGTCTCCACTGACTTGAATCTATTCAAAGACCAAGGAAGCTGTTGCT  
GCTTTGAAGGCTGTTGGTGCTCACTCCGACTTGTTGAAGGTCTTGAAGTCCAAGAAATTGAGAGCCGGTAA  
GGGTAAGT

GGTTAACCAAGCTGAAGAGTTCAAGGCTGCCGATGAAGCTTTTGCCAAGAAGCACGAAGCTAGACAAAGAT  
TGGAATCCTACGTTGCCTCCATCGAACAACTGTCACTGACCCAGTCTTGTCTTCTAAATTGAAGAGAGGT  
TCCAAGTC

GCAGCATATGGTTTTGTAAATCCGTGAGGTTTAAAGACAAATTTGGCTCAGTTCAGGGACTGGTTTTAGGA  
ACCTCAGGTCTTCGCAAAGGTGGGCCTTGTGCTGGTGTGTTGATTATTATCTAGATAGCTTGTAGGGTTTTG  
CTTATGAA

ATATCAGTTAGACTAGATGATACTGTTTGGGTATCTTGGCTGGTTGAAGTGGTTGAAACCCCTTAGAATGAT  
TGTGTGAGAGAAAGTAGCTAGATCTGTTGAAGTAGTTGGACCACTTGGTCTGGTTGAATAAACTGAGGTTG  
AACTGACA

CCTAATTCCAATATGCTTGTCTCCTGTTTCTACGCTTGTTCATCCACACTGGCACCAGGCGAGCGGCGCT  
GCTCTGTGAGCTGTCTTTATCCAGCAGGCTCAAATAGACTTGTCTGCCTCATTATACTGTTTTTTCATTAA  
CCAGTCTC

TGCCAAGTCACTGCTCGGATCAAGGCCAGAACAAGATACAGGCGCCCCTATCAAATGTCTACTGGTGTCA  
CAAGCTCTCCATTAAGTCCATCAGGCTCCACCCAGAACATTCCACCAAGGTCTTGAACAACGGCGAAGAG  
GAGTTCAT

TAATAGTTACTCTATTATTGCTGTTAATTGACAATGTTTAGTCACGTGCAACACAATTCAGTACAGTGGGA  
AAGGCCTTACATGGTGATCCATCTTCTACATCTTCATCGGTCTGCATAAAGTCATAATATGGGGCTACT  
GGAATGTA

ATGCAAATGGTGATCAGACGAGTTATTAAATCAGCCTTCTTCTCATCATCGTTCAGATACAACGAAACAT  
AATGTCAAGGAGAAGTGCAGCAGCACTCGTTTCTGTTTCAACAGGTTTGGTATTTTATCAACTACACGAG  
CCTCTACT

CACTAATGCTACTACCACTGCCAGCACCAACGTCAGGACTAGTGCTACTACCACTGCCAGCATCAACGTCA  
GGACTAGTGCGATTACCACTGAAAGTACCAACTCCAGCACTAATGCTACTACCACTGCCAGCACCAACGTCA  
AGGACTAG

ACTACCACTGCCAGCACCAACGTCAGGACTAGTGCTACTACCACTGCCAGCATCAACGTCAGGACTAGTGC  
GATTACCACTGAAAGTACCAACTCCAGCACTAATGCTACTACCACTGCCAGCACCAACGTCAGGACTAGTG  
CTACTACC

CGGTGCTAGTTGGCACCTCTTCTAGATGGTGGAAACCCATGAGGCAGACTTCCATGGTAGAACACCTTCTTC  
CCACATGGTGTGACTTCTTCCAAAGTCAAACCCTTAGTTTTCTGGAACAACAAACAAACATAGAAGAACA  
TGAAGACC

CTTCTAAGGATGGTGACCCCGAGCTAGAATTTAAAGTTTTACAGGGATATAGGGACCTGGAAAGTGAATG  
CACAAAGGCAGAGCTCAGGTGACCAGAACAGGAGATATAGGTGTTGCTATGGACAATCTGAACGCTGTGGA  
TTCCCTAT



GTGGTGTATTAAGTGATAACGTCATTTACGGTGACGGTAGCAGTGGAACCAAAGCTGGGGAAACTGTTTC  
AGAACAAACGTGGTCCTCACAAGAAGTGATAGTGACCAAAGTGGTAGATTCTTCTGTGACAGTAGCAGTGG  
TAATGTTA

GCGAACTGGTGCGGAGTATACTTTGCACAGTTTCCTTCCTCCCCATCCCCTCTGTCTAGTGCATTGAGCAA  
ATCTCTGCGCCTGTAGGTGGAGGATCCTAGAGTAATGAAGTCTCTGTGCGGAGTATATCTCTTGAATATTAG  
GGAAGCCC

AGTTGTTCCCCAGCAACATTACAGTCGTATGTAAATTGACATTGGACTTTTCTTCCTTCAATGATTTCT  
CCCTAGCTGACCTGGTCGTCACAGTAGCTGACATACCAAGAGATCTTGAAATATGGACAATTCCGTCCATA  
ATGGATGA

CCTATTACTACCAGTTCCTGGACAAGCCTATTACTATAGTCTGAATACGGTTATGATGACGAGGATGGT  
GAAGAAGAGGACCAAGACGAAGATATGGTGGGTGACAGCGGCACTACAAGACAGGAAGATGGTGGCGAGGA  
CAGCAACT

CATGAGGCTTCCCCTAGTTCTCTTTGGGCAAGGACACCGGCGTTGATTTTCATCAGCCTGTTTGAGTACCCA  
TGGATCCTCTGGTGAAACCTTGTGATCTTGGCGATGGAGACACAGGCCTTTCATGTCTCTCACATTCAA  
TCAGATAT

CGAAGAGAGTGATGGTTGTGCTAGATCGTACAAAGAATTGGTAGATCCTGATTTCCCAAGTGACAATGTTT  
TCCTCAGTGAAAGTCCTTCATCGTGGTTATCGTCTACTTCTTGGTCATCGTCATCTTCTTCCTCTTCGTCG  
TCGCTACT

CTCCAACACTAGTGCTACTACCACCGAAAGTACCGACTCCAACACTAGTGCTACTACCACCGAAAGTACCG  
ACTCCAACACTAGTGCTACTACCCTGCTAGCACCAACTCCAGCACTAATGCCACTACCCTGCTAGCACC  
AACTCCAG

GTGGTTACCTCGTCAGAGCTTCTTGTACGATACATACCAGCAACACTTGATGAGGCATGTGGACCAACTGT  
TGTAGTAGACTCAATTAAGATGTAGAGTCCGTGGAAGTGGAAATCACGACAGAGATATTTAGACTTGTG  
AAGTAGTA

CCTTCTTAACGATGTCGTAACCGTCAACAACCTTACCAAAGACAACATGCTTACCCTCAACCATGGGCAT  
GGAACGGTGGTGATGAAGAATTGAGAACCCTTGGTGTGGACCGGCGTTGGCCATGGACAACAAACCTGG  
TCTGTCGT

TATTTTTTCTTAGATATTCTTTAATACTGGGGTTGTGACTGACCAGGTGGCATCGCCATGAAATGTTCTCTG  
CTGTGGAGGATAACCCCTGCTGCGATGGCATTGCGGTGGAGGATACGCCTGTTGTTGCTGATGCGAAGGAG  
GAACCATG

TTAGTGTGCAATGGCTATGACGATACCATCCGCTTATTCGATGTCAAGAGTAGGGATCACCTTTCTGCGAA  
GTTGGAGCCCAAACATAACGATTCAGCACAATTGCCAAACAGGAAGATGGACAAGCATCTCAAGGCCAGGT  
TCAAGCCG

CAGGGGCCAACGACAGTTTCGTCGTTGAACGATTGTGGTAATAAATTGACAAGTTTTTGTGGCATGAACACC  
GCAGAGGACCTCTTCTCGCACGCCTATCAACAGAGGAGCCTTCTTCAATATGGCTGGTCACATCAACAAC  
ATGACAAC

ACAACGGTGGGATCTTTCATAAACAGTGACCGTATGTCCGGCACGGTTCAACATATCAGCACACGCTAAAC  
CTGCTGGACCAGAACCAATGACACCCACTGTAAAGCCAGTGCCTGTACTTGGTGGACAAGGCTTAATCCAT  
CCTTCCTT

TCCATGAGTAACTGAAGGGTTAGTTTTAGTACTGGAATGATCCTGTGCAGCAGCGGTGGATTTAGGACCAG  
TGCTTGAACCAGAGTGACCATGGCTAACAGGGTGGGTAGTTTTGACGTTGATATGTCCATGTGTAGTTGCA  
GTGGCTGA

AAGGCAGCATCAATAGAGGAGTTCTTTGCAGCGCCTGATATAAAGCTGTTGCGTAAGTGCCCTCAACACC  
GAACAATCTCACCGGTGGGGGAGCAGCAGCTTTGGAAGCAGCAGCTCTTAAGCTTGATGCAAATGACCTGG  
TAAAGACT

GTACTGGATGGTCTAGCACTTGTGCTTGCTCTTGAAGTATCATAGAATGACCGGCCCGCACCTGTAATCAC  
ACCGTTTGAGTATGCTGCTGTGCTGACCTGGGACAGTGAACATATAGCCTGACCTATAGGATGGATAAA  
GAGTCAAG

AGCTTCAATAACTTCCAACCTTTGTTGAATGAATGGATGGTCTGGGGCAACCTTGTTAACTTTGGAAAGAG  
ATGCTCTTGCTTCGTCAATTTGACCAGCTTCAACCAAATAACGTGGGGATTCTGGAACGAAAGTCATACCA  
CCGATCAT

CTGCTGTATTTGCAGGTGTAGGTGTATGAAGAGGTGTATCATATGCCATTGACGCCATGAACAGGCCTAAA  
ACACCACCCAGTGCAAACCCTGTTACACCACTCACAACCTGATTTTCCAGGACAGGAAGTCATGAAGTTCAT  
GATCATTT

AGGTGTCTGTGTCCAAACCGAAACTGTTTTGAGACAAGCTTTGGGTGAGAGAATCAAGCCTGTTGTTGTTA  
TCAACAAGGTGCACAGAGCTTTGTTGGAATTGCAAGTTTCTAAGGAAGATTTATACCAAACCTTTGCCAGA  
ACTGTTGA

ATGAACAATATCGTTGCTGATAAAATGACAGAATTATTTAGTGCTGGCAATGAAGAAGATCCAAGAGATTT  
TGATGTGTCTGTCAATCCAAGTCTTGGAACAATGATGTCTTTCCACATAACATGTTTGCACTAGGACCAA  
CTCTACAA

TTCCAGAGGCGGCTTCGGTGGTAGAGGCGGTTCTCGTGGTGGTGCCCGTGGTGGCTCCAGAGGTGGTAGAG  
GTGGCGCTGCTGGTGGTGCCCGTGGTGGTGCCAAGGTCGTTATTGAACCACATAGACATGCCGGTGTTTAC  
ATTGCTAG

AACCTTGTTAAAAAGCCAGAGTGGTCACAATATGAAGACTATCCCAGTCATGAAATTGTCTCCACATATGA  
CTCAAGATTGAGCGTCTCTGCAGTTTCTTACTCACCGACAGATGGCACCTTAGTGTGCAATGGCTATGACG  
ATACCATC

AACTTCTGTGCTGGAGAGGTAATTTGCGCTTGCTCAACTTCTTCAGGTAACTTCTTCCCACATCCAAAT  
CTTCGTCAACCAAATCCCAGGCACCTTCGTCTTCACCAATATCCTCATCGTTAAAGTTTTCTTCGCTAGT  
GGTTCTTC

GTTGAACCTTTGCATCATTACTCCTTGCCCTTCGGAACGTGAGGTGGAAGACTCCACACTGCAACAGCATCGA  
AAGTATTAACCTTCGGAGATCTCACCATAAGGTGAATCCAGGAATGGCGATATGATATCGGTGGTTATTGTC  
CTTGTAGG

GCCAAGCGCCTTAACAACCTTCTGGAGACAACGTTTTCTCGACTTGATAAATGTCTGCAGAGCCTCCAGCGG  
CTTCAATTCCTTTCTTTTTCTGCCTCTGCGGTGGCAGCAACGTGACCATATAGTGTGTAATGATGATAGCT  
ACTTCTGG

TCCACCACCACAACAAAGAGTAGCAACCCATTATCTGGAGGCGTGCCTCCAGCTCCGTTGCCAAAGGCCT  
CTAATCCATATGCTCCAACCTGCAACCACTCAACCAACGGTTCCTCCTATCCTCAACCGGTCCGTATACT  
AATAACCA

TCTGGCTCAGTAACTATCACATCTTCTGAAGCTCCAGAATCCGACAACGGTACCAGCACAGCTGCACCAAC  
TGAAACCTCAACAGAGGCTCCAACCACTGCTATCCCAACTAACGGTACCTCTACTGAAGCTCCAACCACTG  
CTATCCCA

AAAGACCCTCAGAGACCACGGAGTAAAGTTTTACGTTCTTGAAATCCTGGCTGCCAGCATGCGTTCATCC  
GTGACGAGTTCAGCAAGGGCAGGTTGACTCCGCTATCACTCAAAGTTGTCTCGGCTTCTTGTTCCAGCAG  
TTCAACAG

TACTAGGGCACCTCCAAACGCAGTCGCTAGAGTTGCCAAGCTCTTGGACACCACTAGAGAGGTCAAGGTCA  
ACGTCTGAAGTTTTGCCAAGGGACATTAAGCAGGATGCTGTAAGAGTATGTTAATACGTGAAATGAGAGCTA  
TTTGTTTA

GCTGCTTTGTCCGATGCTTTGGCTGCTTTGCAAATCGAAGACCCATCTGCTGATGAATTGAGAAAGGCTGA  
AGTTGGTTTTGAAGAGAGTTGTCACCAAGGCCATGTCTTCTCGTTAAGACTGCATTCATCACATATATATGA  
ATATTACT

GCTCGATATCAAGAGGGTCTTGTAGTCCAGAGCCACGTTCTCAAGACCTACAGGTGAGTCCTCTAAGTTT  
CGTGTGGAAAGCGCTACCTCCTTCATCAACAAGACACGTTTCATCCATATTTTGAAGTAGCGTGACCAGAA  
GGCGTCAG

CCGCTATGAGGTCCACAATTATAAAAGACCAGATACCTTTTACAAGTGACATCATCGTCCTTGTCTCCTTG  
GAGAGAACAGAGCACATTATAAGCAGTCATCAAGTCACCTGGCGTCAAAGCAGATCTCTGGTCTTTAAACT  
CGCTTGTC

TGGCCAGCTAACCACCACTACAGAAATCGAAAACCTCCAGGTTTTCCAGATGGTCTAACAGGTAGCGAAC  
TGATGGACAGAATGAGAGAACAATCCACGAAGTTTTGGCACTGAAATTATCACGGAAACAGTTTTCCAAAGTT  
GATCTGTC

CACTTCGACCAAGCTGGTAAGAAGGTTTTCTAGACGTAATGCTAGAGCTACCAGAGCCGCTAAGATTGCTCC  
AAGACCTCTAGATCTCTTGAGACCTGTTGTTAGAGCCCCAACTGTTAAGTATAACAGAAAGGTCAGAGCTG  
GCAGAGGT

CAGAGCCGCTAAGATTGCTCCAAGACCTCTAGATCTCTTGAGACCTGTTGTTAGAGCCCCAACTGTTAAGT  
ATAACAGAAAGGTCAGAGCTGGCAGAGGTTTTACCTTGGCTGAAGTTAAGGCCGCTGGTTTTGACTGCTGCT  
TATGCCAG

AAGTTTTACCGATACACAAGATGACACCGACACCTTGACCTAAAGCGAACTTGGTCTTGTGTCAGCAATGAAC  
TTGTCTCTTTCGTGGAAGTAAGATCTTCTTTTCGGAGTGACCCAAAATAACCCACTTAGCACCAACATCCTT  
GATTTGGT

ACCGGCATTCGTTGCCAAATCTGCAGCAACCAATTTAGTTTTCCATACCACCGGTCCCAACGTCAGAACCTG  
AACCACCAGCAGTATTCACACCGGGCAAACCCTTTGAGAGATCTGGGACAACCTAAGATCGGCATGGCATCT  
GGGTTTTGT

TTGCCAGGGGAATGAAGCGATTAGTACTAGTCAATGCCTTTTTCTCCAACTGACCTTGTGGAGAAGCCTGT  
AGTTTCAGACCCGCTCTGAGAATTGCTGCCATCTACGAAAGGACGAGGATACTCTTGCCTTTGTGTATGTTT  
CGCAGATG

TTCCGGTGGTGAGTATGCTACAAGAATGACCGGCTGAAACGTCGGTGCCTAGACCAACCTTTATGCCCTGG  
TCCAGCAACCATCGAACCTTACTCTCCAGAAGTCAGAGAGGAGTTGGAAATGGGACAATGAGATATACC  
ACAGCGAC

ATGAACATCTTGTCTCTTAACATTTGTTCTGAAACGGATTGGACATACCACCATCATTGTTCTCAGCCA  
TGCTGGTGTAAAGTGTGAATTTTCCACCGTCTCTTCTAGAGGAATAGTTGTTTGGAGTAGATTCTGTATT  
CTTCGATC

ATGGTCTAACAGGTAGCGAACTGATGGACAGAATGAGAGAACAATCCACGAAGTTTTGGCACTGAAATTATC  
ACGGAAACAGTTTTCCAAAGTTGATCTGTCTTCCAAACCATTCAAGCTATGGACCGAATTTAACGAAGACGC  
AGAACCTG

GTGCTAATGCTTTACTCCAAGAAATTTGGTGGTCTCTAGATCCAAGTGAGTTAACACAAATCAAGAAGGGT  
GATTTAGTGAATGAGAATGAAGACTTGGAAAGAGTTGGACATAGAGGAAGAATATTCTGACTAATAGTCTTC  
TAATTTAA

TCTATTCTAGTATGCAGGCACCATTTTATGGTATGACACCAGGCGCCTCTGCAAATGCTCTACCTCCAAA  
GCCGTACGTTCCAGCAACCACCCTAGTGCTCCTGTTTCATACAGAAGGTAAATATGCGCCACCAAGCCAAC  
CTTCGATG

AGGAACTAGGTATTCAATGTGGTGTCTATCTGGTGTAAACATTGCCACCGAAGTCGCTCAAGAACACTGG  
TCTGAAACAACAGTTGCTTACCACATTCCAAAGGATTTTCAGAGGCGAGGGCAAGGACGTGACCATAAGGT  
TCTAAAGG

AAGAAGAATCCTCCGACTTAACCGGATCAGATACACTATTGTGGTGTAAATCTGGACCTTGACTGTCTAAAC  
AACTCCTCTTGTGTGCTAGCAGCTCTTCTTCCGAGAGACCTGACTTCTTGAACCTTGAATCCCTAGTTTC  
TTTCACCT

CAGGGCTGGTCTACTGCCTTATACTCTAGGATGTACATCCTACCACACACAACAAGCCTGTCACACCATGA  
CTACAGATCCTTCTGTCAAATTGAAGTCCGCCAAAGACTCCCTCGTCTCCTCCTCTTTCGAGTTATCAAAA  
GCTGCTAA

TTTGATTTAGAGGTCATGGATGGTAAAGCAAACATTGAAGTTCGTCCAAGATTCGTCAACAAAGGTGAAAT  
AGTCAAGAGACTAGTCTGGCATCAACATGGCAAACCACAGGACATGTTGAAGGGAATCAGTAAAAACTAC  
CTAAGGAT

AGTGTCCATATAAAGGGTGTGACAAGATTCTTAGAAAGAATAAGTTCAAGACCCAAATATTCGATGATGTG  
GAAGTTGAGAAAGAAGTTGACATCAGGAAGAGAGTGTTCATGTGTTCAACAAAACCTATCGATGACTTCAA  
TGGTGACC

TTGTTCTGTTGCTTTGGAGAATATGCAGGAGATCCTGGGCTGTAGCCTGGAGATGTTGGGGAGTAAGAAG  
GTGAAGTAGGGCTATAGTTTGGAGAGGTGGGAGAGTAAGAAGGTGATGTTGGGGAATAGGATGGTGTGTT  
GGAGAGTA

GTTAGATCAAGAGCAAACCTACGATCTGGTCCTTTATGTCTACAACAAAGTTTCTGACTGTGTGAGACCAAT  
CACAGTTCATATAGGTCCCACGGCAGGTTGGGTTGCAACGTTGGATACGGGTTTTCTTCACAGGATTCCAA  
CAGTAAAG

ATGGATCCTCTGGTGAAACCTTGTGATCTTGGCGATGGAGACACAGGCCTCTTCATGTCTCTCACATTCA  
ATCAGATATCTTGGGACTCTGGAACATAAACATGCCAACGATGATAATTAGAGCCCACAGAAAGCATAG  
TCCCACAG

AGAGACAACACCTGGGACATCAGCTGTTCCAGAGAACCATCATCATGTCTCTCCTCAACCTGCTTCAGTAC  
CACCTCCACAGAATGGACAGTACCAACAGCACGGCATGATGACCCCAAACAAAGCTATGGCCTCTAACTGG  
GCACATTA

ACAAGTTTTCGGTATTGCGTTCTCCATTATGGGTCTATTGCCCTCCATTGCATCTGTGATGGGTGGTGGGC  
TCGGTGGTGGTCCAGCAACATTAGTGTGGGGTTGGTTTCGTTGCTGCGTTTTTTCATTTTACTGGTGGGTATT  
ACCATGGC

CACTCAACAGCAACGAGTGCAGCAACAAAGGGTACAACAACAACAACAACAACAGCAGCAGCAGCAGCAAC  
AGCAGCAACAGCAACAGCAACAGCAACAGCAACGCCAGGGTCAAACCAAAGAAAGATTTCTAGTTCTAAT  
TCTACTGA

CATGGTTTTAACTCGATAAAAAGATTTGAAGGTTCTTCCGACTCTTCTGGACCTGTGGTGTATGCACATA  
TGATGATCATCGTGTGGCCATGAGTTTCTCGCTTCTTGCAGGAATGGTAAATTCTCAAATGAACGTGACG  
AAGTTGCT

CATTAGTTGAAATTAGAGAGGCCAGTTCTAAACTTTTTAATGTCTATTTCTTGTGTGGCTGACCTTGAAGTC  
CGAACCGGAGCCGGTTGTGACACAGGATTGGATGGAGATGATGGTATTTGATGAAATTTGGAAGATGGAAG  
CAAGGAAT

AATCCTATCTGGTTTTCCATAACGCTGGCCCTGTTGCTGGTGCTGGTGCTGCTTCTGGCGCTGCCGCTGCTG  
GTGGTGACGCTGCTGCTGAAGAAGAAAAAGAAGAAGCTGCTGAAGAATCTGACGACGACATGGGTTTT  
GGTTTTATT

CTGGGACATCAGCTGTTCCAGAGAACCATCATCATGTCTCTCCTCAACCTGCTTCAGTACCACCTCCACAG  
AATGGACAGTACCAACAGCACGGCATGATGACCCCAAACAAAGCTATGGCCTCTAACTGGGCACATTACCA  
ACAACCAT

GGAGAGAACAGAGCACATTATAAGCAGTCATCAAGTCACTTGGCGTCAAAGCAGATCTCTGGTCTTTAAAC  
TCGCTTGTCACTAGGAGACTATGTTTCAGGGACCACAGGAAATTTGTTGAGTAGCAGCTTATATTCTCCGTC  
ACCATTTA

AACCTCCTTACGTGGAAGATATGCAGATTGGGGCTCTTGAATCTTTGAGCCTTCTCCATGTGCGTCTGCA  
CTGAAACGCTGACCATGGTTGCCTTAGCGTGCACCTCTGTGGGATGGTGGCCCATCGTCTCGCTCCCAGGG  
ACAAGCT

CGCTGAGGATGAATCAGTAAATGTATTACCTGACTCAGGTGATGGAGTGCTCAGAGGCGTTCCAACCTGATG  
ATGGATACTGCGGAAACTGTGATTGTGGCCAGGTGGAAAGTACATAGGCGACATTTGATAAGGTGTATAC  
GGAATCAT

TCCAGTACCGGATCTAGCAACAAAGAGAATGCAATAACATCAAGCTCTGAAACCACCACAATGGCTGGCCA  
ATATGGTGAAAGTGGAAGCACAAATAATGGATGAACAAGAACTGGTACGTCCAGCCAGTATATTAGTG  
TGACGACG

GTGTCCAATTGCTATCCTCTTACATCACTGAGGAACTAGGTATTCAATGTGGTGCTCTATCTGGTGCTAAC  
ATTGCCACCGAAGTCGCTCAAGAACACTGGTCTGAAACAACAGTTGCTTACCACATTCCAAAGGATTTTCA  
AGGCGAGG

AATGTACATATGGCTAATAGACCTTAATAGTGATACTCTGTTGGTTTTTGGCCTGCTGTGTTGGGGAAACC  
GCATTGCAGTAACGACTTGTCCACAAGATGAGGATCTTCAGTGAGGTTCTCTAGTTTTTCTCTGTCTTTAA  
CGAGGATC

GAGCACATTATAAGCAGTCATCAAGTCACTTGGCGTCAAAGCAGATCTCTGGTCTTTAAACTCGCTTGTCA  
CTAGGAGACTATGTTTCAGGGACCACAGGAAATTTGTTGAGTAGCAGCTTATATTCTCCGTCACCATTTAGA  
TCTTCAGT

TGCTCTATCTGTGTTACGCCACAAACCGGTATGCTCTTAAACAGTTCACCATTGAAGACTCCGTCCTTCA  
CACCGTTGGGATTTGGCTTAATAGGTCAAAGAAGATGGAAATCAAGGGGTAACACCTATCAACCTAGTACA  
TTGAAACG

GATACACAAGATGACACCGACACCTTGACCTAAAGCGAACTTGGTCTTGTGAGCAATGAACTTGTGATCTT  
CGTGGAAGTAAGATCTTCTTTTCGGAGTGACCCAAAATAACCCACTTAGCACCAACATCTTTGATTTGGTCA  
ACGGAGTT

ATGTTCCGTACGCCGCTTTGGAATCAGGGCCATTATTTAAGAGGCCATCTCTGTGATCTGAGTCCGCACA  
CCACAGATCTTCTAGCTTACAGACGTCTAGATCCACTAATGCATTGTTGGAAGACGATTCCACGAAAGTGG  
ATGCTACT

CGGATGATCCATTGAATTGCAAGTGTGCTGCTGTTGTTGTGGTTGCGGTTGCGGTTGTGGCTGCAACTGT  
GATTGCGATTGAAACATCTGGGTTGTCTGTGGTCTTGCACGCTGAGGTTAGTAAATCCACCGTTATTATT  
GCCTGAAC

CCTATCAATAGTTTTCTAACTCATGTGAGTCTTGCATCACAACCTCCTTCAGTTGTACCGCTACATCTGAC  
AACATCCACCAGTCGAAAACAGAACAGGAACCATCGCTATTGCACTCTGCAATAATTGAGCGACATCAAG  
ACGTTTCG

AATGCTCCAAGTTTAAGCAACTTTGCCTCTTTGATAAGCACTGGTCAATTCAATTCTTCTCAAACCTTTGC  
AAACAATTTGAGAGCGGACACACCAAGAAACCAAGTAAGTGGAAACTTTAAGGAAAACGAATACGAAGACA  
ATGGCGAA

AAATCGTAAAGAACTTGCATCGGATGATCCATTGAATTGCAAGTGTGCTGCTGTTGTTGTGGTTGCGGTT  
GCGGTTGTGGCTGCAACTGTGATTGCGATTGAAACATCTGGGTTGTCTGTGGTGTGCGACGTGAGGTTA  
GTAAATCC

TACGACCTGGATGCAAATGGTATCAGACGAGTTATTAATCAGCCTTCTTCTCATCATCGTTAGATACA  
ACTGAAACATAATGTCAAGGAGAACTGCAGCAGCACTCGTTTCTTGTTTCAACAGGTTTGGTATTTTATCA  
ACTACAG

CGAACAAATCAAGAAAGGACTGTGAAGCTATATGTAAACTAGGTTTAAAGGCCAAGATCCTTACACACATTC  
GTTGTACATGGACGATGCCAGAGTCGCCGTAGAGACTGGTGTGACGGTGTGATGTTGTTATCGGCACC  
TCCAAATT

TTGAATGGTATGCTTCTTCTTCTGCTGCCCCAAGCTCTTCTGCTGCTCCAACCTTCTTCTGCTGCCCCAAG  
CTCATCTGCTGCCCCAAGCTTCTTCTGCTGCCTCAAGCTCTTCTGAAGCTAAGTCTTCTTCTGCTGCCCCAA  
GCTCTTCT

TTTGAAGTCTTTGAATGGTATGCTTCTTCTTCTGCTGCCCCAAGCTCTTCTGCTGCTCCAACCTTCTTCTG  
CTGCCCCAAGCTCATCTGCTGCCCCAAGCTTCTTCTGCTGCCTCAAGCTCTTCTGAAGCTAAGTCTTCTTCT  
GCTGCCCC

TGGAACCAGCTTTGAAGTCTTTGAATGGTATGCTTCTTCTTCTGCTGCCCCAAGCTCTTCTGCTGCTCCA  
ACTTCTTCTGCTGCCCCAAGCTCATCTGCTGCCCCAAGCTTCTTCTGCTGCCTCAAGCTCTTCTGAAGCTAA  
GTCTTCTT

TCCTCTAGATTGGAACCAGCTTTGAAGTCTTTGAATGGTATGCTTCTTCTTCTGCTGCCCCAAGCTCTTC  
TGCTGCTCCAACCTTCTTCTGCTGCCCCAAGCTCATCTGCTGCCCCAAGCTTCTTCTGCTGCCTCAAGCTCTT  
CTGAAGCT

TCCATGGTACTCCTCTAGATTGGAACCAGCTTTGAAGTCTTTGAATGGTATGCTTCTTCTTCTGCTGCCC  
CAAGCTCTTCTGCTGCTCCAACCTTCTTCTGCTGCCCCAAGCTCATCTGCTGCCCCAAGCTTCTTCTGCTGCC  
TCAAGCTC

CACAATCAATGCTCGCCTTCAAGGTAAGATGTTGCCTCCAACTTGACTGCTCCAAGGTTAGAAAGAG  
AAACTCCTCTGTCTTACCAACTTGTACAGACGCACAAGATACAGTCGACCGGTTTGTAGCCTGTGAC  
AGTGATAG

GCTCAAGCATCACAATCAATGCTCGCCTTCAAGGTAAGATGTTGCCTCCAACTTGACTGCTCCAAGG  
TTAGAAAGAGAACTCCTCTGTCTTACCAACTTGTACAGACGCACAAGATACAGTCGACCGGTTTGT  
AGCCTGTG

TTCTGCTGCCCCAAGCTCTTCTGCTGCTCCAACCTTCTTCTGCTGCCCCAAGCTCATCTGCTGCCCCAAGCT  
CTTCTGCTGCCTCAAGCTCTTCTGAAGCTAAGTCTTCTTCTGCTGCCCCAAGCTCTTCTGAAGCTAAGTCT  
TCTTCTGC

CCAAGCTCTTCTGCTGCTCCAACCTTCTTCTGCTGCCCCAAGCTCATCTGCTGCCCCAAGCTTCTTCTGCTGC  
CTCAAGCTCTTCTGAAGCTAAGTCTTCTTCTGCTGCCCCAAGCTCTTCTGAAGCTAAGTCTTCTTCTGCTG  
CCCCAAGC

AGCAAGATGTTGACCATGGTTCATGGTACTCCTCTAGATTGGAACCAGCTTTGAAGTCTTTGAATGGTGA  
TGCTTCTTCTTCTGCTGCCCCAAGCTCTTCTGCTGCTCCAACCTTCTTCTGCTGCCCCAAGCTCATCTGCTG  
CCCCAAGC

ATGCTTCTTCTTCTGCTGCCCCAAGCTCTTCTGCTGCTCCAACCTTCTTCTGCTGCCCCAAGCTCATCTGCT  
GCCCCAACTTCTTCTGCTGCCTCAAGCTCTTCTGAAGCTAAGTCTTCTTCTGCTGCCCCAAGCTCTTCTGA  
AGCTAAGT

TTCTGCTGCCCCAAGCTCTTCTGAAGCTAAGTCTTCTTCTGCTGCTCCAAGCTCCACTGAAGCTAAGATAA  
CTTCTGCTGCTCCAAGCTCCACTGGTGCCAAGACCTCTGCCATCTCTCAAATTACCGATGGTCAAATCCAA  
GCTACCAA

CTGCTGCTCCAACCTTCTTCTGCTGCCCCAAGCTCATCTGCTGCCCCAACTTCTTCTGCTGCCTCAAGCTCT  
TCTGAAGCTAAGTCTTCTTCTGCTGCCCCAAGCTCTTCTGAAGCTAAGTCTTCTTCTGCTGCCCCAAGCTC  
TTCTGAAG

GCTCGCTTCAAGGTAAGATGTTGCCTCCAACTTGACTGCTCCAAGGTTAGAAAGAGAACACTCCTC  
TGTCTTACCAACTTGTACAGACGCACAAGATACAGTCGACCGGTTTGTAGCTGTGACAGTGATAGCA  
GTAGCACT

GTAGTGACAACGTTGGCAAAGCGAAGGTACCACCAAAGCAGGAGCCACAGAAGACTGTGAGAACAGTCAAC  
ACAGCAAATCAACAAGAAAAGCAACAACAGAGGCAGCAGCAGCCGTCTCCGCATAATGTTAAGGACCGCAA  
GGAGCAA

CTAAGTCTTCTTCTGCTGCCCCAAGCTCTTCTGAAGCTAAGTCTTCTTCTGCTGCTCCAAGCTCCACTGAA  
GCTAAGATAACTTCTGCTGCTCCAAGCTCCACTGGTGCCAAGACCTCTGCCATCTCTCAAATTACCGATGG  
TCAAATCC

TGACCATGGTTCATGGTACTCCTCTAGATTGGAACCAGCTTTGAAGTCTTTGAATGGTGATGCTTCTTCT  
TCTGCTGCCCCAAGCTCTTCTGCTGCTCCAACCTTCTTCTGCTGCCCCAAGCTCATCTGCTGCCCCAACTT  
TTCTGCTG

TCTTCTGCTGCCTCAAGCTCTTCTGAAGCTAAGTCTTCTTCTGCTGCCCCAAGCTCTTCTGAAGCTAAGTC  
TTCTTCTGCTGCCCCAAGCTCTTCTGAAGCTAAGTCTTCTTCTGCTGCCCCAAGCTCTTCTGAAGCTAAGT  
CTTCTTCT

GCTTCTGCGGATGAGGAAGCTGAATTACAAAGAAGGCTTCAACTGGGGTTGAGAGTGTCTCCAAGACGTA  
GAGAACATCTTACGCACCTGAGGAAGGTTTCGTGCGGACCTCTTACCGAGGTCGGTACTCCAAGATTACCT  
AACGTATC

GCCAGCGCTGGTAGTGACAACGTTGGCAAAGCGAAGGTACCACCAAAGCAGGAGCCACAGAAGACTGTGAG  
AACAGTCAACACAGCAAATCAACAAGAAAAGCAACAACAGAGGCAGCAGCAGCCGTCTCCGCATAATGTTA  
AGGACCGC

CTAAGGGACAATTTAACCTTATGGACTTTCAGACATGTCCGAGTCCGGTCAAGCTGAAGACCAACAACAACA  
ACAACAACATCAGCAACAGCAGCCACCTGCTGCCGCCGAAGGTGAAGCACCAAAGTAAGTATTCTGATAAA  
TCTAAAGA

CTTAGCCATTAATTCTTGGACACCTTTACCTTTAGCAGACTTGATGGTGTCTCTTCAAATAAGCGTGGGG  
AGTCTCGATGTGGAAGTGACGTTGAGTCTCGGTGCAAGCACCGTTAATACCACTGGAGGCCTTGATAGAG  
TTCCCACC

TACCACTGAAAGTACCAACTCCAGCACTAATGCTACTACCACTGCCAGCACCAACGTCAGGACTAGTGCTA  
CTACCACTGCCAGCATCAACGTCAGGACTAGTGCGACTACCACTGAAAGTACCAACTCCAACACTAGTGCT  
ACTACCAC

CATGCAACTGCTAAGGGACAATTTAACCTTATGGACTTTCAGACATGTCCGAGTCCGGTCAAGCTGAAGACC  
ACAACAACAACAACAACATCAGCAACAGCAGCCACCTGCTGCCGCCGAAGGTGAAGCACCAAAGTAAGTA  
TTCTGATA

GCTGCCCCAAGCTCATCTGCTGCCCCAACTTCTTCTGCTGCCTCAAGCTCTTCTGAAGCTAAGTCTTCTTC  
TGCTGCCCCAAGCTCTTCTGAAGCTAAGTCTTCTTCTGCTGCCCCAAGCTCTTCTGAAGCTAAGTCTTCTT  
CTGCTGCC

GTCTTCTTCTGCTGCTCCAAGCTCCACTGAAGCTAAGATAACTTCTGCTGCTCCAAGCTCCACTGGTGCCA  
AGACCTCTGCCATCTCTCAAATTACCGATGGTCAAATCCAAGCTACCAAGGCTGTTTCTGAGCAAAGTAA  
AACGGTGC

AACTTCTTCTGCTGCCCCAAGCTCATCTGCTGCCCCAACTTCTTCTGCTGCCTCAAGCTCTTCTGAAGCTA  
AGTCTTCTTCTGCTGCCCCAAGCTCTTCTGAAGCTAAGTCTTCTTCTGCTGCCCCAAGCTCTTCTGAAGCT  
AAGTCTTC

TCTTCTGAAGCTAAGTCTTCTTCTGCTGCCCCAAGCTCTTCTGAAGCTAAGTCTTCTTCTGCTGCTCCAAG  
CTCCACTGAAGCTAAGATAACTTCTGCTGCTCCAAGCTCCACTGGTGCCAAGACCTCTGCCATCTCTCAA  
TTACCGAT

TGCCCCAACTTCTTCTGCTGCCTCAAGCTCTTCTGAAGCTAAGTCTTCTTCTGCTGCCCCAAGCTCTTCTG  
AAGCTAAGTCTTCTTCTGCTGCCCCAAGCTCTTCTGAAGCTAAGTCTTCTTCTGCTGCCCCAAGCTCTTCT  
GAAGCTAA

CCTCAAGCTCTTCTGAAGCTAAGTCTTCTTCTGCTGCCCCAAGCTCTTCTGAAGCTAAGTCTTCTTCTGCT  
GCCCCAAGCTCTTCTGAAGCTAAGTCTTCTTCTGCTGCCCCAAGCTCTTCTGAAGCTAAGTCTTCTTCTGCT  
TGCTCCAA

AAGTCTTCTTCTGCTGCCCCAAGCTCTTCTGAAGCTAAGTCTTCTTCTGCTGCCCCAAGCTCTTCTGAAGC  
TAAGTCTTCTTCTGCTGCCCCAAGCTCTTCTGAAGCTAAGTCTTCTTCTGCTGCTCCAAGCTCCACTGAAG  
CTAAGATA

CTGCTGCCCCAAGCTCTTCTGAAGCTAAGTCTTCTTCTGCTGCCCCAAGCTCTTCTGAAGCTAAGTCTTCT  
TCTGCTGCCCCAAGCTCTTCTGAAGCTAAGTCTTCTTCTGCTGCTCCAAGCTCCACTGAAGCTAAGATAAC  
TTCTGCTG

TGCTGGTGTAGCAAGATGTTGACCATGGTTCATGGTACTCCTCTAGATTGGAACCAGCTTTGAAGTCTT  
TGAATGGTGATGCTTCTTCTTCTGCTGCCCCAAGCTCTTCTGCTGCTCCAAGTCTTCTGCTGCCCCAAGC  
TCATCTGC

TGGTGAAGGAGTGAGAGTTTGACCTTGGCTTTAGAGTCTTATGATGGGGATGGTGGTGTAGGTGTTGATGA  
GGATGATGAGGGAGTGCGGCCGGCAGCGTGGGAGGAGCGAACGGCATGGAAGAAGCAGCGTTTGAACAAT  
CGTAGTGG

AAGCTCTTCTGAAGCTAAGTCTTCTTCTGCTGCCCCAAGCTCTTCTGAAGCTAAGTCTTCTTCTGCTGCC  
CAAGCTCTTCTGAAGCTAAGTCTTCTTCTGCTGCTCCAAGCTCCACTGAAGCTAAGATAACTTCTGCTGCT  
CCAAGCTC

AAGAACGGCAGCACTCCTGACACGCAGACCGCCAGCGCTGGTAGTGACAACGTTGGCAAAGCGAAGGTACC  
ACCAAAGCAGGAGCCACAGAAGACTGTGAGAACAGTCAACACAGCAAATCAACAAGAAAAGCAACAACAGA  
GGCAGCAG

AACTAGAAGGTGTTGCAAACCCATTATGAGTAAATTTTACGGAGCTGCAGGTGGTGCCCCAGGAGCAGGC  
CCAGTTCGGGTGCTGGAGCAGGCCCACTGGAGCACCAGACAACGGCCCAACGGTTGAAGAGGTTGATTA  
GATAAATA

GCACTCCTGACACGCAGACCGCCAGCGCTGGTAGTGACAACGTTGGCAAAGCGAAGGTACCACCAAAGCAG  
GAGCCACAGAAGACTGTGAGAACAGTCAACACAGCAAATCAACAAGAAAAGCAACAACAGAGGCAGCAGCA  
GCCGTCTC



ATTTAACCTTATGGACTTCAGACATGTCCGAGTCCGGTCAAGCTGAAGACCAACAACAACAACAACAT  
CAGCAACAGCAGCCACCTGCTGCCGCCGAAGGTGAAGCACCAAAGTAAGTATTCTGATAAATCTAAAGAGA  
AATTACTA

GAAGCTAAGTCTTCTTCTGCTGCCCCAAGCTCTTCTGAAGCTAAGTCTTCTTCTGCTGCCCCAAGCTCTTC  
TGAAGCTAAGTCTTCTTCTGCTGCTCCAAGCTCCACTGAAGCTAAGATAACTTCTGCTGCTCCAAGCTCCA  
CTGGTGCC

CGATCAAGAAAGCTCTAATAATTCTTTCTTAACACAGTTGGCACATCTGGAACCACCGTAAGCTCTGGAA  
ACAGTCTTGTGGGTCTTGGAAACAGTGGCGTATTGTCTTGGTCTCAAAGTAGAGATACCTTGCAAAGCGCT  
ACCACAGT

GCTCATCTGCTGCCCCAACTTCTTCTGCTGCCTCAAGCTCTTCTGAAGCTAAGTCTTCTTCTGCTGCCCCA  
AGCTCTTCTGAAGCTAAGTCTTCTTCTGCTGCCCCAAGCTCTTCTGAAGCTAAGTCTTCTTCTGCTGCCCC  
AAGCTCTT

TTCTGAAGCTAAGTCTTCTTCTGCTGCCCCAAGCTCTTCTGAAGCTAAGTCTTCTTCTGCTGCCCCAAGCT  
CTTCTGAAGCTAAGTCTTCTTCTGCTGCCCCAAGCTCTTCTGAAGCTAAGTCTTCTTCTGCTGCTCCAAGC  
TCCACTGA

GCACACTTATCATGCAACTGCTAAGGGACAATTTAACCTTATGGACTTCAGACATGTCCGAGTCCGGTCAA  
GCTGAAGACCAACAACAACAACAACATCAGCAACAGCAGCCACCTGCTGCCGCCGAAGGTGAAGCACC  
AAAGTAAG

CGTCTTCTGCATGCTTCTTCTTCTTCTCACCCTAAGCCATGAGAAGAAGAGGAAGATTGTACTGAAG  
GTGATGGTGCAGAAGGAGAAGGAGAAGGATGGTTCTGATATGGCAGCCAATAAGTCCTTTCTCGAATCA  
TTGCTGAA

GCTGCTCCAAGCTCCACTGAAGCTAAGATAACTTCTGCTGCTCCAAGCTCCACTGGTGCCAAGACCTCTGC  
CATCTCTCAAATTACCGATGGTCAAATCCAAGCTACCAAGGCTGTTTCTGAGCAAAGTAAAACGGTGCTG  
CTAAGGCC

TAATGTCACCGCTTCTTCTGCGGATGAGGAAGCTGAATTACAAAGAAGGCTTCAACTGGGGTTGAGAGTGTCT  
CCAAGACGTAGAGAACATCTTACGCACCTGAGGAAGGTTTCGTCCGGACCTCTTACCGAGGTCCGTACTCC  
AAGATTAC

AGGTTGACTTTGCTGGTGTAGCAAGATGTTGACCATGGTTCATGGTACTCCTCTAGATTGGAACCAGCT  
TTGAAGTCTTTGAATGGTGTGCTTCTTCTTCTGCTGCCCCAAGCTCTTCTGCTGCTCCAAGTCTTCTGCTG  
TGCCCCAA

GATGAGGCATGCAGGTTGGATTATGCTCTTATCGACCCTGATTTCTTGCAAACAGTAGACGCAGGTGTCAG  
GTTCACTGAACGGATCCCTCACCTGGACTGCAGTGTCTCTGACCATTTTGCATACTCATGCACCCTTAACA  
TCGTCCCA

TGCCCCAAGCTCTTCTGAAGCTAAGTCTTCTTCTGCTGCCCCAAGCTCTTCTGAAGCTAAGTCTTCTTCTG  
CTGCTCCAAGCTCCACTGAAGCTAAGATAACTTCTGCTGCTCCAAGCTCCACTGGTGCCAAGACCTCTGCC  
ATCTCTCA

GATGAGGAAGCTGAATTACAAAGAAGGCTTCAACTGGGGTTGAGAGTGTCTCCAAGACGTAGAGAACATCT  
TCACGCACCTGAGGAAGGTTTCGTCCGGACCTCTTACCGAGGTCCGTACTCCAAGATTACCTAACGTATCTT  
CTGCAGGT

ATGCACTGCTGTGGGTACGGCCATTCTGTGGAGGTGGTACTGAAGCAGGTTGAGGAGAGGCATGATGGGG  
GTTCTCTGGAACAGCTGATGAAGCAGGTGTTGTTGTCTGTTGAGAGTTAGCCTTAGTGGAAGCCTTATCAT  
ATTCTTGA



GAATGAATCCATACTTCTCCTCATCATTAGACCGAACGATGGGGTCTTGGTTCAAAGAATTGGTGAAGGAG  
TGAGAGTTTTGACCTTGGCTTTAGAGTCTTATGATGGGGATGGTGGTGTAGGTGTTGATGAGGATGATGAGG  
GAGTGC GG

TGGATACGGTGATGTTTACTGGTATACTGGCGGTTCTCAGGTCGCTGAAGCTTTCAGGGTCAAGTATGTTG  
GGGGTGGTATGATCACGGCGTGCACAACCCATACCAGGACAACGGGGTCAAGATCGTGGAACCGACGGGATC  
GATGCTTT

TGAGTGTAAACGTGAGCCCTGTAATCACATAGAATAGAGTATGGAGGTTGCATCAAGTGAGTTCTGATGGC  
AATCTGGTTGGACAAAGTCCCAGAGACACAGAACAAACCTGCTTCTTTGCCAGCCATGCGGGCAACGGTCT  
GTTTCGAGC

CTGAAGCTAAGTCTTCTTCTGCTGCTCCAAGCTCCACTGAAGCTAAGATAACTTCTGCTGCTCCAAGCTCC  
ACTGGTGCCAAGACCTCTGCCATCTCTCAAATTACCGATGGTCAAATCCAAGCTACCAAGGCTGTTTTCTGA  
GCAAACTG

TGGCATCTGCAGTTAAATCAACAGTTTGTTCCTTACTATTTGTTCCAGGTTTCGTTGTCGGCGGTGCTGCG  
TCAAGCATCGGGGAAGCACTCGGAGTGTGGCTGTTTGTGAAAGAACGTCCATTGTGTGCAATTCTTCAAC  
ATTATTCCG

AGTGTGTCAACTGGAAACATCATAGCTCTTCTTCTTGTCCCTTCCACAGTGCCTGTTGCTGTTCTTGTGTT  
GCTGTTGAAAGCCTTGATTTTGAAGTGAAGTCAAGGCTGCTGAGATGGTTGATAATCCATTTTTTGAAGGTA  
TTTTCTGT

TAAAGGAATCCATTAAATTACGTCTTAGTGAAGATAATTTACAACCTGGACGGTGTGACAAGATTGCTGTG  
TTACATGGTGGTACAAAGGCATTACAAGTAACACCTCCTGAACATAAATCGGATATCCCTCCTCCACCTGA  
TGGAGGTG

CGTGAGCCCTGTAATCACATAGAATAGAGTATGGAGGTTGCATCAAGTGAGTTCTGATGGCAATCTGGTTG  
GACAAAGTCCCAGAGACACAGAACAAACCTGCTTCTTTGCCAGCCATGCGGGCAACGGTCTGTTTCGAGCCT  
AACGGTGT

GACTCCAACACTAGTGCTACTACCACCGAAAGTACCGACTCCAACACTAGTGCTACTACCAGTCTGACTGAC  
CAACTCCAGCACTAATGCCACTACCAGTCAAGTACCAACTCCAGCACTAATGCCACTACCAGTCAAGTCA  
CCAACGCT

AGAATAGAGTATGGAGGTTGCATCAAGTGAGTTCTGATGGCAATCTGGTTGGACAAAGTCCCAGAGACACA  
GAACAAACCTGCTTCTTTGCCAGCCATGCGGGCAACGGTCTGTTTCGAGCCTAACGGTGTCAACATCTTCA  
CGTAGACA

AGTACCGACTCCAACACTAGTGCTACTACCAGTCAAGTACCAACTCCAGCACTAATGCCACTACCAGTCA  
TAGCACCAACTCCAGCACTAATGCCACTACCAGTCAAGTACCAACTCCAGCACTAATGCCACTACCAGTCA  
AAGATGGC

GCTTCCGCCACTGACGACTCCTACACTACTTTTGTACTCTGAGGTTGACTTTGCTGGTGTGATGCAAGATGTT  
GACCATGGTTCCATGGTACTCCTCTAGATTGGAACCGCTTTGAAAGTCTTTGAATGGTGTGATGCTTCTTCT  
CTGCTGCC

CTGTTGCTGTTGCTGCTGCTGCTGTTGTTGTTGTTGTTGCTGTTGTTGTTGTTGTTGTTGTTGTTGTTGTT  
CAAAGTCAACCTTTGAGTCCACCAGCTCCGAGCCATCTCCCTCTTCAGACCAGTCTACAGTACTTATTG  
TTCAAAGT

AACGTCAAGACTAGTGCAGCTACCAGTCAAGTACCAACTCCAGCACTAATGCTACTACCAGTCAAGTCA  
CAACGTCAAGACTAGTGCAGCTACCAGTCAAGTACCAACTCCAGCACTAATGCTACTACCAGTCAAGTCA  
CCAACCTC

ACGTTTCGAATCTTCAGTATGAGTTGACGGAGGTGTGGAATCGGTTGGACTCACAGCTTTTGAAGGACAT  
TTCTCAGTTGCTCAGGATGTAGTTCAATGTCAGATTGGAAGTCATGGTCAGATTCTATGTTAAGATCATTG  
GATTGTTG

GTACTGCTTGGAGGGTGGAAATACGGAGCTTTTTCTCTTATCTCTGTTGTTGTCTTCCCCTCTGTGGTGAC  
TGTGTCCCTGGCCATGGTGATGGTGGGAATGCATGTATGGAGAAGCACCGCTTGTTCGAGTTTTCGAATAGTT  
TGAGAGGA

CAGTTGTTGCTCCAGGTGAAACAATCCAGGTTCAAGTTATCTTCTGGGTTTGACTGAAGAGCCTGCCGCA  
GACTTTAAGTGCCGTGACAAGTTCTGGTTATCACGTTGCCCTTCTCCTTACGACCTCAATGGCAAGGCTGT  
TGCAGATG

CTTCTGGGTTTGACTGAAGAGCCTGCCGAGACTTTAAGTGCCGTGACAAGTTCTGGTTATCACGTTGC  
CTTCTCCTTACGACCTCAATGGCAAGGCTGTTGCAGATGTTTGGTCCGACTTGGAGGCTGAGTTCAAGCAA  
CAGGCTAT

CACGCAGACCGCCAGCGCTGGTAGTGACAACGTTGGCAAAGCGAAGGTACCACCAAAGCAGGAGCCACAGA  
AGACTGTGAGAACAGTCAACACAGCAAATCAACAAGAAAAGCAACAACAGAGGCAGCAGCAGCCGTCTCCG  
CATAATGT

AGACTTTAAGTGCCGTGACAAGTTCTGGTTATCACGTTGCCTTCTCCTTACGACCTCAATGGCAAGGCTG  
TTGAGATGTTTGGTCCGACTTGGAGGCTGAGTTCAAGCAACAGGCTATCTCTAAAAAGATAAAAAGTCAA  
TATTTGAT

GTAATCACATAGAATAGAGTATGGAGGTTGCATCAAGTGAGTTCTGATGGCAATCTGGTTGGACAAAGTCC  
CAGAGACACAGAACAAACCTGCTTCTTTGCCAGCCATGCGGGCAACGGTCTGTTTCGAGCCTAACGGTGTCA  
ACATCTTC

CTGACGACTCCTACACTACTTTGACTCTGAGGTTGACTTTGCTGGTGTAGCAAGATGTTGACCATGGTT  
CCATGGTACTCCTCTAGATTGGAACCAGCTTTGAAGTCTTTGAATGGTGATGCTTCTTCTTCTGCTGCC  
AAGCTCTT

ATGAGGGATCTGGCTTGGACCCACATAAGGGAGCTACCACATCTTCCACCCAAAAGAGTTCTTCTCAACT  
GCAACCTCTTCTCCTCAAACGTCATCCGATCACAGCAGTTCAACTAAGAAGAGTAGTAAGACTAGTTCCAC  
CGCTTCAT

AGTACCAACTCCAGCACTAATGCTACTACCACTGCCAGCACCAACGTCAGGACTAGTGCTACTACCACTGC  
CAGCATCAACGTCAGGACTAGTGCGACTACCACTGAAAGTACCAACTCCAACACTAGTGCTACTACCACCG  
AAAGTACC

GGTACCGTTCTTTCTCCACGAGGGCTGTTTGGTATGGTAAGGTCAGTGCTAGAATAAAGACGTCACATCT  
TGCTGGTGTGGTCACTGGGTTCACTTCTGTATTCCGGCGCAGGTGATGAACTTGATTACGAATTCGTCGGTG  
CTGATCTA

TGCTACTACCACTGCCAGCACCAACGTCAGGACTAGTGCTACTACCACTGCCAGCATCAACGTCAGGACTA  
GTGCGACTACCACTGAAAGTACCAACTCCAACACTAGTGCTACTACCACCGAAAGTACCGACTCCAACACT  
AGTGCTAC

AGAGTCCGCTGAGGATGAATCAGTAAATGTATTACCTGACTCAGGTGATGGAGTGCTCAGAGGCGTTCCAA  
CTGATGATGGATACTGCGGAAACTGTGATTGTGGCCAGGTGGAAAGTACATAGGCGACATTTGATAAGGT  
GTATACGG

CTTCTTCTGCTGCCCCAAGCTCTTCTGAAGCTAAGTCTTCTTCTGCTGCCCCAAGCTCTTCTGAAGCTAAG  
TCTTCTTCTGCTGCTCCAAGCTCCACTGAAGCTAAGATAACTTCTGCTGCTCCAAGCTCCACTGGTGCCAA  
GACCTCTG

CGACTACCAACTCCAGCACTAATGCTACTACCACTGCCAGCACCAACGTCAGGACTAGTGCTACTACCACT  
GCCAGCATCAACGTCAGGACTAGTGCGACTACCACTGAAAGTACCAACTCCAGCACTAATGCTACTACCAC  
TGCCAGCA

TTCCAACAATTCAGACCAAACCATTGCATTTAAGGTCAAGACCACAGCCCCAAAGTTTTACTGCGTGAGAC  
CAAACGCCGAGTTGTTGCTCCAGGTGAAACAATCCAGGTTCAAGTTATCTTCTGGGTTTACTGAAGAG  
CCTGCCGC

CTCCAGCACTAATGCTACTACCACTGCCAGCACCAACGTCAGGACTAGTGCTACTACCACTGCCAGCATCA  
ACGTCAGGACTAGTGCGACTACCACTGAAAGTACCAACTCCAGCACTAATGCTACTACCACTGCCAGCACC  
AACGTCAG

TTGTCTGTTGCTTATAAGAACGTTATTGGTGCTCGTCGTGCCTCTTGGAGAATTGTTTCTTCTATTGAGCA  
AAAGGAGGAGTCCAAGGAGAAGTCCGAACACCAGGTCGAGTTGATTTGTTTCGTACCGTTCGAAGATTGAGA  
CCGAACTA

TGCAATAATGAACAGTCACATGCACGCCCCATACGCCAAGCAGGGTGATGCCGCCTACTTGTGCCACAGAT  
CTTGTCCAGGCTGGGATTTCCAGCAGGCTCATTAAGCTTTACAGGCAGGCCGGTTATGCGGTGATTGTGGTG  
GGTGACTT

TCATCATTAGACCGAACGATGGGGTCTTGGTTCAAAGAATTGGTGAAGGAGTGAGAGTTTGACCTTGGCTT  
TAGAGTCTTATGATGGGGATGGTGGTGTAGGTGTTGATGAGGATGATGAGGGAGTGCGGCCGCGCAGCGTGG  
GAGGAGCG

CCTGTTGCCAAGTGATGTCAACTGGAAACATCATAGCTCTTCTTTCTTGCCTTCCACAGTGCCCTGTTGC  
TGTTCTTGTGCTGTTGAAAGCCTTGATTTTTGAAGTGAGTCAGGCTGCTGAGATGGTTGATAATCCATTTT  
TTGCAAGG

CCCATTATGAGTAAATTTTACGGAGCTGCAGGTGGTGCCCCAGGAGCAGGCCAGTTCGGGGTGCTGGAGC  
AGGCCCCACTGGAGCACCAGACAACGGCCCAACGGTTGAAGAGGTTGATTAGATAAATACAAAGATGCGAT  
GAAGTAGC

GAGGGTGAAATACGGAGCTTTTTCTCTTATCTCTGTTGTTGTCTTCCCCTCTGTGGTGACTGTGTCCCTG  
GCCATGGTGATGGTGGGAATGCATGTATGGAGAAGCACCGCTTGTGAGTTTCGAATAGTTTGAGAGGATG  
ATGACGGC

GAGTCCGCTGAGGATGAATCAGTAAATGTATTACCTGACTCAGGTGATGGAGTGCTCAGAGGCGTTCCAAC  
TGATGATGGATACTGCGGAAACTGTGATTGTGGCCAGGTGGAAAGTACATAGGCGACATTTGATAAGGTG  
TATACGGA

TACCCAATTGAAGTTGCTGAGGCCGTTTTCAACTACGGTGACTTCACCACCATGTTGACTGGTATTGCCCC  
AGACCAAGTGACCAGAATGATCACCGGTGTTCCATGGTACTCCAGCAGATTAAGCCAGCCATTTCCAGTG  
CTCTATCC

ATGGACAGTGATGAGGGATCTGGCTTGGACCCACATAAGGGAGCTACCACATCTTCCACCCAAAAGAGTTC  
TTCTCAACTGCAACCTCTTCTCCAAAACGTCATCCGATCACAGCAGTTCAACTAAGAAGAGTAGTAAGA  
CTAGTTCC

AGCTCTAATAATTCTTTCTTAAACACAGTTGGCACATCTGGAACCACCGTAAGCTCTGGAAACAGTCTTGT  
GGGTCTTGGAAACAGTGGCGTATTGTCTTGGTCTCAAAGTAGAGATACCTTGCAAAGCGCTACCACAGTCA  
CCACACTT

TCTTCAGTATGAGTTGACGGAGGTGTGGAATCGGTTGGACTCACAGCTTTTGAAGGACATTTCTCAGTTG  
CTCAGGATGTAGTTCAATGTCAGATTGGAAGTCATGGTCAGATTCTATGTTAAGATCATTGGATTGTTGGA  
TCTCATTT

TTTTGGAAACACGTTTCGAATCTTCAGTATGAGTTGACGGAGGTGTGGAATCGGTTGGACTCACAGCTTTT  
GAAAGGACATTTCTCAGTTGCTCAGGATGTAGTTCAATGTCAGATTGGAAGTCATGGTCAGATTCTATGTT  
AAGATCAT

CGTAAGCAATCACGTACCTCAACATATTTCTTTTCGCAGCACGCCACGCCTTTTCGGTGCCAACTTGGAAATGA  
AGTCTGACCTGTTCAATGGTTTTGAGATTTACTGGGTCAACAGTTATCCATTTCTTAGAGAATTTGTCCCA  
CACTTCAC

GCTGTTGTTGCTGTTGCTGTTGCTGCTGCTGCTGTTGTTGTTGTTGTTGCTGTTGTTGTTGTTGTTGTTGTTG  
TTTGGTGAGACAAAGTCACCCTTTGAGTCCACCAGCTCCGAGCCATCTCCCTCTTCAGACCAGTCTACAGT  
GACTTTAT

GGTACAAAGGCATTACAAGTAACACCTCCTGAACATAAATCGGATATCCCTCCTCCACCTGATGGAGGTGC  
CTTAGCCATCGTCACCAAAACTGGCTTTGAAACATCTCAGGGTTCTTTAGTTTCAGATTATGATTTACTCCG  
CTGAACGT

ATCTTCAGAAAAGAACGGCAGCACTCCTGACACGCAGACCGCCAGCGCTGGTAGTGACAACGTTGGCAAAG  
CGAAGGTACCACCAAAGCAGGAGCCACAGAAGACTGTGAGAACAGTCAACACAGCAAATCAACAAGAAAAAG  
CAACAACA

CGTACTGCGCTGCGGAAGTGTGGATGAGTGGCATATACACTCTTCTGCAGAGGATTTTCGTACACAACGGT  
GTGTGTGTGCTGTGAAGCTGTCTGCTTCTTACTTTGGCTGTTTGCTTGTGCGTCATGGTCACTTTTG  
TTAGAAGT

ATCTTCAGTATGAGTTGACGGAGGTGTGGAATCGGTTGGACTCACAGCTTTTGAAAGGACATTTCTCGGTT  
GCTCAGGATGTAGTTTCGATGTCAGATTGGAAGTCATGGTCAGATTCTATGTTAAGATCATCGGATTGTTGG  
ATCTCATT

TGCTACTACCACTGCTAGCACCAACTCCAGCACTAATGCCACTACCACTGCTAGCACCAACTCCAGCACTA  
ATGCCACTACCACTGAAAGTACCAACGCTAGTGCCAAGGAGGACGCCAATAAAGATGGCAATGCTGAGGAT  
AATAGATT

GCTTTTCAGGATAACCGCATTACGTACTGCGCTGCGGAAGTGTGGATGAGTGGCATATACACTCTTCTGCAGA  
GGATTTTCGTACACAACGGTGTGTGTGTGCTGTGAAGCTGTCTGCTTCTTACTTTGGCTGTTTGCTTGTCT  
GTGCGTCA

GCTCGAGAAAGTTGGAGTTTTTTCAGCGTTTTGCGTTCCATGACGAGCGCTGGACTGCAGGGTCCGCAGTACG  
TCAAGCTGCAGTTTAGCAGGCATCATCGACAGTTGAGGAGCAGATATGAATTAAGTCTAGGAATGCACTTG  
CGAGATCA

GATAACGATATAATGTCACCGCTTCTGCGGATGAGGAAGCTGAATTACAAAGAAGGCTTCAACTGGGGTT  
GAGAGTGTCTCCAAGACGTAGAGAACATCTTTCACGCACCTGAGGAAGGTTTCGTGCGGACCTCTTACCGAGG  
TCGGTACT

GTTGGTGACTTAGAACCTTCTGTTTCCGAAGCCACTTATATGATATCTTCTCTCCAATCGGTTTCAGTCTC  
CTCCATTCGTGTCTGTGCTGATGCCATCACTAAGACCTCTTTGGGCTATGCTTATGTTAACTTTAACGACC  
ATGAAGCC

TTTTGTTCTTCGATCAAGAAAGCTCTAATAATTCTTTCTTAAACACAGTTGGCACATCTGGAACCACCGTA  
AGCTCTGGAAACAGTCTTGTGGGTCTTGGAAACAGTGGCGTATTGTCTTGGTCTCAAAGTAGAGATACCTT  
GCAAAGCG

ATCTTTCTTAAACACAGTTGGCACATCTGGAACCACCGTAAGCTCTGGAAACAGTCTTGTGGGTCTTGGTA  
AACAGTGGCGTATTGTCTTGGTCTCAAAGTAGAGATACCTTGGAAAGCGCTACCACAGTCAACACACTTTG  
GTCTGGTA

TTGCCGTCGAGCTGTTGTTGCTGTTGCTGTTGCTGCTGCTGCTGTTGTTGTTGTTGTTGCTGTTGTTGTTG  
TTGTTGGTTGTTTGGTGAGACAAAGTCACCCTTTGAGTCCACCAGCTCCGAGCCATCTCCCTCTTCAGACC  
AGTCTACA

ATTGAAGACCCCTTCTGATTCCCTTCCATGAATTTAAATCGTAGGGTTGAATGTTTCCCAGCCAGTCTGGT  
AAAGGTCTCCAGACGTTGGGGACAATGACGTCCTTGTCTGATGCATTAGATCCTCCATGATGGTAGTGGG  
GATGGTTT

CACCTTTACCTTTAGCAGACTTGATGGTGTCTATCTTCAAATAAGCGTGGGGAGTCCCTCGATGTGGAAGTGA  
CGTTGAGTCTCGGTGCAAGCACCGTTAATACCACTGGAGGCCTTGATAGAGTTCCACCGATCGAGGAAGC  
CTTTTCGA

TGCCAGCATCAACGTCAGGACTAGTGCGACTACCACTGAAAGTACCAACTCCAGCACTAATGCTACTACCA  
CTGCCAGCACCAACGTCAGGACTAGTGCTACTACCACTGCCAGCATCAACGTCAGGACTAGTGCGACTACC  
ACTGAAAG

CGAATATTGGTTTTAGAAACACGTTTTCGAATCTTCAGTATGAGTTGACGGAGGTGTGGAATCGGTTGGAC  
TCACAGCTTTTGAAGGACATTTCTCGGTTGCTCAGGATGTAGTTTCGATGTCAGATTGGAAGTCATGGTCA  
GATTCTAT

GCCAAGAATTTGGATACGGTGATGTTTCAGTACTGGTATACTGGCGGTTCTCAGGTCGCTGAAGCTTCAGGG  
TCAGTATGTGGGGTGATGATCACGGCGTCGCACAACCATAACCAGGACAACGGGGTCAAGATCGTGGAAC  
CAGACGGA

GGCAAGGTAAGCCTGTGTTTCATTAGACACAGAACTCCTCATGAAATTCAGGAAGCCAACAGTGTGGATATG  
TCCGCTTTGAAGGACCCACAGACCGATGCTGACAGAGTCAAAGACCCTCAATGGTTAATTATGCTGGGTAT  
TTGTACTC

GATGTTGCCTCCAAACTTGACTGCTCCAAGGTTAGAAAGAGAACACTCCTCTGTCCTTGACCAACTTGTCA  
CAGACGCACAAGATACAGTCGACCGGTTTTGTAGCCTGTGACAGTGATAGCAGTAGCACTATTGAATGAGTT  
AACGGGCA

CGGTAATTTGTTGCTGTTGCTTATAAGAACGTTATTGGTGCTCGTCGTCCTCTTGAGAGAATTGTTTCTT  
CTATTGAGCAAAAGGAGGAGTCCAAGGAGAAGTCCGAACACCAGGTCGAGTTGATTTGTTTCGTACCGTTCCG  
AAGATTGA

GCTGGTGTGTTTTGGATATCGGTATGGCTTTAGCTTCCGCCACTGACGACTCCTACACTACTTTGTACTCTGA  
GGTTGACTTTGCTGGTGTAGCAAGATGTTGACCATGGTTCCATGGTACTCCTCTAGATTGGAACCAGCTT  
TGAAGTCT

TATGGCTTTAGCTTCCGCCACTGACGACTCCTACACTACTTTGTACTCTGAGGTTGACTTTGCTGGTGTTA  
GCAAGATGTTGACCATGGTTCCATGGTACTCCTCTAGATTGGAACCAGCTTTGAAGTCTTTGAATGGTGAT  
GCTTCTTC

ACGAACCCAAGGAGGAAAATAAGGACGTTCAAAGCCCTCTGATGGACCTTCTGCTACTGCTTCAGAGAAC  
GAACAAGCTGCTGCTTCCACTGCTGCTCCCGCTTTGTACCAGAAGAAATTAAGGCCAAAGCATTGGATCT  
TTTAAATA

TTCAAAGAATTGGTGAAGGAGTGAGAGTTTGACCTTGGCTTTAGAGTCTTATGATGGGGATGGTGGTGTAG  
GTGTTGATGAGGATGATGAGGGAGTGCGGCCGGCAGCGTGGGAGGAGCGAACGGCATGGAAGAAGCAGCGT  
TTGAGACA

CGAATATTGGTTTTGGAAACACGTTTTCGAATCTTCAGTATGAGTTGACGGAGGTGTGGAATCGGTTGGACT  
CACAGCTTTTGAAGGACATTTCTCAGTTGCTCAGGATGTAGTTCAATGTCAGATTGGAAGTCATGGTCA  
ATTCTATG

CCAGCACTAATGCTACTACCACTGCCAGCACCAACGTCAGGACTAGTGCTACTACCACTGCCAGCATCAAC  
GTCAGGACTAGTGCGACTACCACTGAAAGTACCAACTCCAACACTAGTGCTACTACCACCGAAAGTACCGA  
CTCCAACA

ACAGTTTGTTCCTTACTATTTGTTCCAGGTTTCGTTGTGGCGGTGCTGCGTCAAGCATCGGGGAAGCACT  
CGGAGTGTGTTGCTGTTTGTGAAAGAACGTCCATTGTGTGCAATTCTTCAACATTATTCGTTAATGTGATAT  
TGTTACCA

CCCACCAGGATAGGTCATGTTTCGTACCATGGCAACTTTAAAAACAACCTGATAAGAAGGCCCTGAGGACAT  
CGAGGGCTCGGACACAGTGCAAATTGAGTTGCCTGAATCTTCTTCGAGTCGTATATGCTAGAGCCTCCAG  
ACTTGTCT

TGGATATCGGTATGGCTTTAGCTTCCGCCACTGACGACTCCTACACTACTTTGTACTCTGAGGTTGACTTT  
GCTGGTGTAGCAAGATGTTGACCATGGTTCCATGGTACTCCTCTAGATTGGAACCAGCTTTGAAGTCTTT  
GAATGGTG

AACTTCTTCTGGATCTAACGAATACTTTAGGAATGAATCCATACTTCTCCTCATCATTAGACCGAACGATG  
GGGTCTTGGTTCAAAGAATTGGTGAAGGAGTGAGAGTTTGACCTTGGCTTTAGAGTCTTATGATGGGGATG  
GTGGTGTA

AACTACGGTGACTTCACCACCATGTTGACTGGTATTGCCCCAGACCAAGTGACCAGAATGATCACCGGTGT  
TCCATGGTACTCCAGCAGATTAAAGCCAGCCATTTCCAGTGCTCTATCCAAGGACGGTATCTACACTATCG  
CAAACCTAG

CAAGATGACGAACAGAACGCTGGTGAAGACGATAACGATATAATGTCACCGCTTCTGCGGATGAGGAAGC  
TGAATTACAAAGAAGGCTTCAACTGGGGTTGAGAGTGTCTCCAAGACGTAGAGAACATCTTCACGCACCTG  
AGGAAGGT

GTCCTTGTGCGTGATGCATTAGATCCTCCATGATGGTAGTGGGGATGGTTTTGACATCCACGTCTCTCCAGT  
AAACCCAGGAGTGGTATGGTTTTAGGGCCACGGACCCAAGCCAATTACGAGCCCTGGCCATCAGCTTTCTT  
CTGGGGCC

CATTACAAGTAACACCTCCTGAACATAAATCGGATATCCCTCCTCCACCTGATGGAGGTGCCTTAGCCATC  
GTCACCAAACTGGCTTTGAAACATCTCAGGGTTCTTTAGTTGAGTTATGATTTACTCCGCTGAACGTGT  
TTCCGTCTG

TACGCCTTGCCAAAGACTTACAACAAGTTGCACTACTGTGTCTCCTGTGCTATTCACGCCAGAATTGTTAG  
AGTTAGATCCAGAGAAGACAGAAAGAACAGAGCTCCTCCACAAAGACCAAGATTTAACAGGGATAACAAAG  
TTTTCTCA

GCAATCTGATCTCGCAAGTGCAATTCCTAGGCTTAATTCATATCTGCTCCTCAACTGTCGATGATGCCTGCT  
AAACTGCAGCTTGACGTACTGCGGACCCTGCAGTCCAGCGCTCGTCATGGAACGCAAACGCTGAAAACTC  
CAACTTTC

CACCAACGTCAGGACTAGTGCTACTACCACTGCCAGCATCAACGTCAGGACTAGTGCGACTACCACTGAAA  
GTACCAACTCCAGCACTAATGCTACTACCACTGCCAGCACCAACGTCAGGACTAGTGCTACTACCACTGCC  
AGCATCAA

TATTGAAGTGGCTACCGCATTGTCCAAATACATCAATGAAGGTAACCTCTGTGCGTTTCACTCAACTTCCCAG  
AAGTGGCATTGAAATCATTGTCTTACGACCAAGAGAACACTGTGCGTGTGTTATACATTCACCAAAATGTA  
CCAGGTGT

CATCAAGTGAGTTCTGATGGCAATCTGGTTGGACAAAGTCCCAGAGACACAGAACAAACCTGCTTCTTTGC  
CAGCCATGCGGGCAACGGTCTGTTTCGAGCCTAACGGTGTCAACATCTTACCCTAGACAGCGTCACCGATA  
GAGGCCTC



ATCGAATAATAACAAAAGTATTAACAACAGTAATGCTGATTCTGCTCCTCCGTTGAGGTTGCACAATCCAG  
TTTTCGTACTCTCCTTCGAATGAACCCATACAACCTTCAAGCAGTCTATTGAGTCAATTGACACAGGACACC  
GATAATCG

TCTCCTGTGCTATTACGCCAGAATTGTTAGAGTTAGATCCAGAGAAGACAGAAAGAACAGAGCTCCTCCA  
CAAAGACCAAGATTTAACAGGGATAACAAAGTTTCTCCAGCAGCTGCCGCAAAGAAAGCTTTGTAAATATG  
ATGAGAGA

AAGGAGAAGGTTGAAATTTCTAAGGAGATCAGATCCATTTTCCAGATTGGAGGAAGGTGAACTTGAACAG  
ACGTAGATGGCTTCAAAGATGTGTACAGGATGAAGAGTAGCAGTATGTTTGATCTTGGTAAGAGTTCAGCC  
ACAATGCA

CGATGAGGTAGGAAAAGTTGGTGTTCATTTGGCGTTGAATACTTCTGGGAAAGACAAGGTTCAGTTTGTCT  
CCAGCAAGGACATTCTTGACATCTCAGCTTCTCTGGAGAAGATTGCTACCTAAATCAACCAACGGCTTCTT  
CTCGCAGC

AACTGAAACCTACCCAATTGAAGTTGCTGAGGCCGTTTTCAACTACGGTGACTTCACCACCATGTTGACTG  
GTATTGCCCCAGACCAAGTGACCAGAATGATCACCGGTGTTCCATGGTACTCCAGCAGATTAAGCCAGCC  
ATTTCCAG

TTGATGGTGTTCATCTTCAAATAAGCGTGGGGAGTCCCTCGATGTGGAAGTGACGTTGAGTCTCGGTGCAAGC  
ACCGTTAATACCACTGGAGGCCTTGATAGAGTTCCACCGATCGAGGAAGCCTTTTCGAGGATGGTTACAG  
GGATGTTA

GTTGTCAAATGGCAAGGTAAGCCTGTGTTTATTAGACACAGAACTCCTCATGAAATTCAGGAAGCCAACAG  
TGTGGATATGTCGGCTTTGAAGGACCCACAGACCGATGCTGACAGAGTCAAAGACCCTCAATGGTTAATTA  
TGCTGGGT

CGCATTAGTACTGGCGTTAGTACTGGCATTAGCACTACCATGAATGCACGTGTTGCTGTCCTCATCACTGC  
TGCAATACTTTCTGTACCTGTCACTGCTATTGCTCTCCTGGAAGTTAGACGGTAACGCAACGATCGACATG  
GAAGCTGT

AGTACCAATGCGACTACCAACTCCAGCACTAATGCTACTACCACTGCCAGCACCAACGTGAGGACTAGTGC  
TACTACCACTGCCAGCATCAACGTCAGGACTAGTGCGACTACCACTGAAAGTACCAACTCCAGCACTAATG  
CTACTACC

TAAGGTCAAGACCACAGCCCCAAAGTTTTACTGCGTGAGACCAAACGCCGAGTTGTTGCTCCAGGTGAAA  
CAATCCAGGTTCAAGTTATCTTCTGGGTTTTGACTGAAGAGCCTGCCGAGACTTTAAGTGCCGTGACAAG  
TTCCTGGT

GGTTTGGATCCAAGTCAGAGTAACAGAAATGAGAGTGTATTTGAGTCTTGTTAGCAACACCAGAAGTAGCA  
ACTCTGAAAGCTTCGGCAGCCAGGTGTAGTAAGCAGATCTCTCAGTACCTTCTCTCAATGGTAAACCTTC  
TCTTAAAG

AAGACCCAGTAACGTACACTTTATTACCCCTGTTGCCAAGTGATGTCAACTGGAAACATCATAGCTCTT  
CCTTTCTTGCCCTTCCACAGTGCCTGTTGCTGTTCTTGTGCTGTTGAAAGCCTTGATTTTGAAGTGAGTC  
AGGCTGCT

CTGAATTACAAAGAAGGCTTCAACTGGGGTTGAGAGTGTCTCCAAGACGTAGAGAACATCTTCACGCACCT  
GAGGAAGGTTGTCGGGACCTCTTACCAGGTGCGTACTCCAAGATTACCTAACGTATCTTCTGCAGGTCA  
GGATGATG

TGCCGATGTGCTTGACCTCGTCACTCGAGGCTCTTCTTTACCGGGAGTGCTTGATCTTTGTTGAAGAAT  
GTGCACTCAAGACCTCAGATGTGGAGTGTGGCCTCATTGGATTGGACTGTTTATTACTACAAACCAAGGGA  
TATTGATG

AACAGTCACATGCACGCCCCATACGCCAAGCAGGGTGATGCCGCTACTTGTGCCACAGATCTTGTCCAGGC  
CTGGGATTTTCAGCAGGCTCATTAAAGCTTTACAGGCAGGCCGTTATGCGGTGATTGTGGTGGGTGACTTAA  
ACTCCAGA

AAAGAAACAAACGAACCCAAGGAGGAAAATAAGGACGTTCAAAAGCCCTCTGATGGACCTTCTGCTACTGC  
TTCAGAGAACGAACAAGCTGCTGCTTCCACTGCTGCTCCCGCTTTGTACCAGAAGAAATTAAGGCCAAAG  
CATTGGAT

CCATTGCATTTAAGGTCAAGACCACAGCCCCAAAGTTTTACTGCGTGAGACCAAACGCCGAGTTGTTGCT  
CCAGGTGAAACAATCCAGGTTCAAGTTATCTTCCCTGGGTTTTGACTGAAGAGCCTGCCGCAGACTTTAAGTG  
CCGTGACA

AATACTTTTAGGAATGAATCCATACTTCTCCTCATCATTAGACCGAACGATGGGGTCTTGGTTCAAAGAATT  
GGTGAAGGAGTGAGAGTTTGACCTTGGCTTTAGAGTCTTATGATGGGGATGGTGGTGTAGGTGTTGATGAG  
GATGATGA

ACCGAACGATGGGGTCTTGGTTCAAAGAATTGGTGAAGGAGTGAGAGTTTGACCTTGGCTTTAGAGTCTTA  
TGATGGGGATGGTGGTGTAGGTGTTGATGAGGATGATGAGGGAGTGCGGCCGGCAGCGTGGGAGGAGCGAA  
CGGCATGG

AAGAGAAACGAATACCAATTGTTGGACATTGATGACGGTTTTCTTGTCTTTGATGAACATGGACGGTGACAC  
TAAGGATGATGTCAAGGCTCCAGAAGGTGAATTGGGTGACAGTTTGCAAACCTGCTTTTATGAAGGTAAGG  
ACTTGATG

CAGTATGCCAGCTGGTGTTTTTGGATATCGGTATGGCTTTAGCTTCCGCCACTGACGACTCCTACACTACTT  
TGTACTCTGAGGTTGACTTTGCTGGTGTAGCAAGATGTTGACCATGGTTCATGGTACTCCTCTAGATTG  
GAACCAGC

CCACCAAGACCTCTTAAGGATTCGGCAGCCAAGAATTTCCAGCTTGAGCTACGGTCATTTGGATCAATGAA  
CCCAGTTGGATGAACTTTGAATTTGGTCCATGTCAATCAGATCAGCGCCTAACTTCTGCAGAAGCCTTTGAC  
CATCACCA

GGATCTAACGAATACTTTAGGAATGAATCCATACTTCTCCTCATCATTAGACCGAACGATGGGGTCTTGGT  
TCAAAGAATTGGTGAAGGAGTGAGAGTTTGACCTTGGCTTTAGAGTCTTATGATGGGGATGGTGGTGTAGG  
TGTTGATG

TACATAAACATAGGAGAAGCAGGAGCGTTCATAATATTGATGACATTTCTTAAATTTTCGAGGCAACCTCC  
ACACCACCAGCTCCGACCTCTGCTCCCTCAATTCCTGTTGAACATTCTAACCATGTACTTCCATTGAAAT  
ACCTAAGA

GTTTTAGAAACACGTTTTCGAATCTTCAGTATGAGTTGACGGAGGTGTGGAATCGGTTGGACTCACAGCTTT  
TGAAAGGACATTTCTCGGTTGCTCAGGATGTAGTTCGATGTGAGATTGGAAGTCATGGTCAGATTCTATGT  
TAAGATCA

CTAGTGCTACTACCACCGAAAGTACCGACTCCAACACTAGTGCTACTACCCTGCTAGCACCAACTCCAGC  
ACTAATGCCACTACCCTGCTAGCACCAACTCCAGCACTAATGCCACTACCCTGAAAGTACCAACGCTAG  
TGCCAAGG

TGGCTTGGACCCACATAAGGGAGCTACCACATCTTCCACCCAAAAGAGTTCTTCCCTCAACTGCAACCTCTT  
CCTCCAAAACGTCATCCGATCACAGCAGTTCAACTAAGAAGAGTAGTAAGACTAGTTCCACCGCTTCATCA  
TCATCATC

AGTTAAATCAACAGTTTTGTTCTTACTATTTGTTCCAGGTTTTCGTTGTGCGCGGTGCTGCGTCAAGCATCG  
GGGAAGCACTCGGAGTGTGTTGCTGTTTGTGAAAGAACGTCCATTGTGTGCAATTTCAACATTATTCGTT  
AATGTGAT

ACGCTAGTATTTCCAACAATTCCAGACCAAACCATTGCATTTAAGGTCAAGACCACAGCCCCAAAGTTTTAC  
TGCGTGAGACCAAACGCCGAGTTGTTGCTCCAGGTGAAACAATCCAGGTTCAAGTTATCTTCCTGGGTTT  
GACTGAAG

TGCTTGGTACCTGGCCATTACTAGAAGAAGAGAAACAATTAGTGTATTGGATTGACAAGAGGCAAGCAAG  
GGAGCCAAGTTTTCCGCATGTCTGGAAGGCAGATCAAAGAGTTGTATTATAAAGTATGGAGCAACTTGCGT  
GAATCGAA

CCACTGCCAGCACCAACGTCAGGACTAGTGCTACTACCACTGCCAGCATCAACGTCAGGACTAGTGCGACT  
ACCACTGAAAGTACCAACTCCAGCACTAATGCTACTACCACTGCCAGCACCAACGTCAGGACTAGTGCTAC  
TACCACTG

TTGCTCTCCTGGAAGTTAGACGGTAACGCAACGATCGACATGGAAGCTGTCGCCTGTTTTTCAGCCAATCT  
GTCCATTCTTTCTATCAGTTCCACTGTGTGTCAGCAGACAGGTCTGTCCTGGAGCCACAGCATCCAACATGCT  
GGCCCTTT

GGCACATCTGGAACCACCGTAAGCTCTGGAAACAGTCTTGTGGGTCTTGGAAACAGTGGCGTATTGTCTTG  
GTCTCAAAGTAGAGATACCTTGCAAAGCGCTACCACAGTCACCACACTTTGGTCTGGTAGCTAACTTCTTG  
ACATGTTG

TTCTTCGTCAAATGCGTTCTTTAGTGCATTTATACTGCCGATGGAACCAGGAATTCTGTACAATCCCCTT  
CATCTAGCCACGCAGCTCAATCTCTTCCAGCAATTTACAACAATTGTAGGTATCAAGGTATTCTCTCTT  
TCACAAAC

TGGAGGTGGTACTGAAGCAGGTTGAGGAGAGGCATGATGGGGTTCTCTGGAACAGCTGATGAAGCAGGTG  
TTGTTGTCTGTTGAGAGTTAGCCTTAGTGGAAGCCTTCTCACATTCTTCTGTTTTGGAAGCTGAAACGCTC  
AACGGATC

CAGTCCACCTCTCAAATCTGTGGGGCTATTTCCAGACAAAAGCATTGGACACAACACCGAACAGCCACCAG  
CACCAAGACCGTAGATGATCTTACCACAAAAGTACTGGTACCATTTGTGATTTGAACTGATCTGAATAATT  
GCACCAAC

AGAAAATACCGAACGTCATGTTCCAGTTGGTACAATGAGACCAGTCCACCTCTCAAATCTGTGGGGCTATT  
TCAGACAAAAGCATTGGACACAACACCGAACAGCCACCAGCACCAAGACCGTAGATGATCTTACCACAAA  
GTACTGGT

TTTAGCAGACTTGATGGTGTCTCTTCAAATAAGCGTGGGGAGTCCCTCGATGTGGAAGTGACGTTGAGTCT  
CGGTGCAAGCACCGTTAATACCACTGGAGGCCTTGATAGAGTTCCACCGATCGAGGAAGCCTTTTCGAGG  
ATGGTTAC

AAAGAACCAAGCCCTAAGCCTTCTCACAAAGAGGAACCAAAGTAACAGCAGCATTCTTCTGCATGGTCCAA  
GTTTAAGCACAAGTCTGCATCATCACCTGCTAATGCGGACACGGATATTCAAGATTCATCAACTCCATCAA  
CTAGTCCA

TCTTTCCAAGCTGCTCACCAACTGAAACCTACCCAATTGAAGTTGCTGAGGCCGTTTTCAACTACGGTGA  
CTTACCACCATGTTGACTGGTATTGCCCCAGACCAAGTGACCAGAATGATCACCGGTGTTCCATGGTACT  
CCAGCAGA

AAGCGAGCCTAAAGAAACAAACGAACCCAAGGAGGAAAATAAGGACGTTCAAAGCCCTCTGATGGACCTT  
CTGCTACTGCTTCCAGAGAACGAACAAGCTGCTGCTTCCACTGCTGCTCCCGCTTTGTACCAGAAGAAATT  
AAGGCCAA

GTCAAATTAACCTTCAATTGCCGCTGGTGTGCGCCATCGCTGCTACTGCTTCCGCAACCACCACTCTAGC  
TCAATCTGACGAAAGAGTCAACTTGGTTGAATTGGGTGTCTACGTATCTGATATCAGAGCTCATTTGGCTC  
AATACTAC

AAACCTGCTGCATGAATGAAGATACATCCTGGCACACCGCTCTTGGTGCTCAGCTCTTCGTCTCTGAGGCC  
TCTTAATGGCTCCGGCAAACCTCTCCTAAACTGGAAGGAGGTGGAGTTGATTGGTACAGTAGATACCCTCC  
AGGCACCA

CTATTCAAGGGATAGTGTGTGTCACAGAGGAGATTCCAATGACTTTTCATGCACGGTGAAGATGGAAGTCCTA  
GCGGATATCAGAAGCAAGAAACCTGGATGACTTCACCCAAGGAAACACAAGATCTTCTTCAATCGCCCCAA  
TTTCAGCA

ATGACTTCTTCTTATGCTCAGATGATGCTCTGTGAACTAAGTGCGCAGTCCTTCAAACCTTTCCACTCAGG  
TAATCTTGATAAAGTTTTCCAAGATGGTCCATTCTCTGGGTCTCTTACATAAAACAACTTCACTCCGTATTT  
CTCCACTT

GAGAGTGTATTTGAGTCTTGTAGCAACACCAGAAGTAGCAACTCTGAAAGCTTCGGCAGCCCAGGTGTAG  
TAAGCAGATCTCTCAGTACCTTCTCTCAATGGTAAACCTTCTCTTAAAGCTGGTTCATCAACTTGGATAAC  
CTTGATAC

TAAACTCACTTGTCAATTATTGAAAGTGAACGTGATCCAGAACCCTTGTGGGGCTTCCCTACAGAGGAAGGT  
GAACTTGGATCCCAAGTCACCGGCGAACTCGCTGGTGATGACATGCCGAAATTATGTCTGCTTGAATTACG  
CTTGTTGT

AGGACTAGTGCTACTACCCTGCCAGCATCAACGTCAGGACTAGTGCGACTACCCTGAAAGTACCAACTC  
CAGCACTAATGCTACTACCCTGCCAGCACCAACGTCAGGACTAGTGCTACTACCCTGCCAGCATCAACG  
TCAGGACT

TCGACAGAATACGCTAGTATTTCCAACAATTCAGACCAAACCATTGCATTTAAGGTCAAGACCACAGCCCC  
AAAGTTTTACTGCGTGAGACCAAACGCCGAGTTGTTGCTCCAGGTGAAACAATCCAGGTTCAAGTTATCT  
TCCTGGGT

AATTCTTGGACACCTTTACCTTTAGCAGACTTGATGGTGTCATCTTCAAATAAGCGTGGGGAGTCCTCGAT  
GTGGAAGTGACGTTGAGTCTCGGTGCAAGCACCGTTAATACCCTGGAGGCCTTGATAGAGTTCCACCGA  
TCGAGGAA

AGATTGCTGTGTTACATGGTGGTACAAAGGCATTACAAGTAACACCTCCTGAACATAAATCGGATATCCCT  
CCTCCACCTGATGGAGGTGCCTTAGCCATCGTCACCAAACTGGCTTTGAAACATCTCAGGGTTCTTTAGT  
TCGAGTTA

TCCTTCCATGAATTTAAATCGTAGGGTTGAATGTTTCCCAGCCAGTCTGGTAAAGGTCTCCAGACGTTGGG  
GACAATGACGTCCTTGTCTGATGCATTAGATCCTCCATGATGGTAGTGGGGATGGTTTTCGACATCCACGT  
CTCTCCAG

ACTTACCCAAAGGAAACACAAGATCTTCTTCAATCGCCCCAATTTTCAGCAGGCCCAAACGTTCCGGAAGAGG  
CCCATCAACCAACGTCAGGTCATCCTTGGACCGCACAAAGAGAACAGATGATCGCCACTAACCAACTAGATA  
ACCGCTAC

CTGCGTGAGACCAAACGCCGAGTTGTTGCTCCAGGTGAAACAATCCAGGTTCAAGTTATCTTCTCGGGTT  
TGACTGAAGAGCCTGCCGCAGACTTTAAGTGCCGTGACAAGTTCTTGGTTATCACGTTGCCTTCTCCTTAC  
GACCTCAA

CAGTTTTCGAATCTTTCAGTATGAGTTGACGGAGGTGTGGAATCGGTTGGACTCACAGCTTTTGAAAGGACA  
TTTCTCGGTTGCTCAGGATGTAGTTTCGATGTCAGATTGGAAGTCATGGTCAGATTCTATGTTAAGATCATC  
GGATTGTT

ACTGCCAGCACCAACGTCAGGACTAGTGCTACTACCCTGCCAGCATCAACGTCAGGACTAGTGCGACTAC  
CACTGAAAGTACCAACTCCAACACTAGTGCTACTACCACCGAAAGTACCGACTCCAACACTAGTGCTACTA  
CCACCGAA

GATAGTGTGTGTCACAGAGGAGATTCCAATGACTTTTCATGCACGGTGAAGATGGAAGTCTTAGCGGATATCA  
GAAGCAAGAAACCTGGATGACTTCACCCAAGGAAACACAAGATCTTCTTCAATCGCCCAATTTTCAGCAGG  
CCCAAACG

GACAACTTAGGAGGATCGAACTATTCAAGGGATAGTGTGTGTCACAGAGGAGATTCCAATGACTTTTCATGCA  
CGGTGAAGATGGAAGTCTTAGCGGATATCAGAAGCAAGAAACCTGGATGACTTCACCCAAGGAAACACAAG  
ATCTTCTT

ACAATCCAGGTTCAAGTTATCTTCTGGGTTTGACTGAAGAGCCTGCCGCAGACTTTAAGTGCCGTGACAA  
GTTCTGGTTATCACGTTGCCTTCTCTTACGACCTCAATGGCAAGGCTGTTGCAGATGTTTGGTCCGACT  
TGGAGGCT

GCAAATTGCTCACCTGACATCACATTGATGGCAATATCCAAGTCGTGAGAACCTTGTCCCAGAAGCTTGTC  
ACGCACCCATCCGCCCGTGATCCGAAGAGTCAATGGCTCAGGCTTATTGTGGTACTTTTGTATTGTACAAGT  
CTGTATAA

TAGAAGGCATAGCACTTTCCGACAACCTTAGGAGGATCGAACTATTCAAGGGATAGTGTGTGTCACAGAGGAG  
ATTCCAATGACTTTTCATGCACGGTGAAGATGGAAGTCTTAGCGGATATCAGAAGCAAGAAACCTGGATGAC  
TTCACCCA

ATATCTCCCACGGCTACGGCAAATACAAGCGGATCGCAACAGATCAATATCGACTCTGCCCTGAGAGACAG  
GTCGAGTAACGTTGCAGCACAAACCATCATTGTGGACGCTTCAAGTGGCAGCAACGACAAAGAACTGAAAG  
TGCTACTG

AGACACAAATCAGCGAGGCAGTTGATCTCGGACGAAAACAAGCGGATCAACGCCTTGTTGACCAAGGCTAA  
CAAAGCTGCAGAGAGTTCTACTGCTGCTAGGCGACTTGTGCCCAAAGCGACGTACTTTAGCGTGGAAGCGC  
CACCGTCT

TAGCTGGACTTCTGAATTAGTTTTATTACCAAATATCATCTTGACACCACACATTGGTGGCTCTACCGAAG  
AAGCCCAAAGCTCAATCGGTATTGAAGTGGCTACCGCATTGTCCAAATACATCAATGAAGGTAACCTCTGTC  
GGTTCAGT

TTCTTCAAATTGTTAGATAAGGCAGAAACAATTTGCAAACCTGGAGGCAACTTCCAGACGATCTGTGAGT  
TCTTGCCACAGAGTGGCCACCCAATTGAGCCAATAGGTCCAATTTCAAATCAAATTCGTTTTTCAACCATT  
CAATAGCC

ATACTTCTCCTCATCATTAGACCGAACGATGGGGTCTTGGTTCAAAGAATTGGTGAAGGAGTGAGAGTTTG  
ACCTTGGCTTTAGAGTCTTATGATGGGGATGGTGGTGTAGGTGTTGATGAGGATGATGAGGGAGTGCGGCC  
GGCAGCGT

GCTGCTATGAAGGATGGCGCTTATGTTATTAATGCTTCAAGAGGTAAGTGTGCGTGGACATTCCATCTTTGAT  
CCAAGCCGTGAAAGCCAACAAAATTGCAGGTGCTGCTTTGGATGTTTATCCACATGAACCAGCTAAGAACG  
GTGAAGGT

TAGTGGATGTGTACTGCTTGGAGGGTGAAATACGGAGCTTTTTCTCTTATCTCTGTTGTTGTCTTCCCCT  
CTGTGGTACTGTGTCCCTGGCCATGGTGTGGTGGGAATGCATGTATGGAGAAGCACCGCTTGTGCGAGTT  
TCGAATAG

AAGACAACCCGATGAGGCATGCAGGTTGGATTATGCTCTTATCGACCCTGATTTCTTGCAAACAGTAGACG  
CAGGTGTGAGGTTCACTGAACGGATCCCTCACCTGGACTGCAGTGTCTCTGACCATTTTGCATACTCATGC  
ACCCTTAA

CAGAACGCTGGCCAAGAATTTGGATACGGTGATGTTTCAGTACTGGTATACTGGCGGTTCTCAGGTCGCTGA  
AGCTTCAGGGTCAGTATGTGGGGGTGATGATCACGGCGTCGCACAACCCATACCAGGACAACGGGGTCAAG  
ATCGTGGA

TCTTGACTACAGTAGTATAA CTTTGTAGTTCGTTTATCAGACAGTGTAGGTCTGTTTGGTGACCTAGGGGG  
TGGAAGAACTGGTATCCTGTTATTATCTCCGAGTGCTGTCAATTCTTGTACTATGCCAGAGTCCTTAATTG  
AAGGTACA

CCCATTCTGTGGAGGTGGTACTGAAGCAGGTTGAGGAGAGGCATGATGGGGGTTCTCTGGAACAGCTGATG  
AAGCAGGTGTTGTTGTCTGTTGAGAGTTAGCCTTAGTGGAAGCCTTATCATATTCTTGAATTTTGGAAAGCT  
GAAACGTC

AACCTGGATGACTTCACCCAAGGAAACACAAGATCTTCTTCAATCGCCCCAATTTTCAGCAGGCCCAAACGT  
TCGGAAGAGGCCCATCAACCAACGTCAGGTCATCCTTGGACCGCACAAAGAGAACAGATGATCGCCACTAAC  
CAACTAGA

AGGAAACACAAGATCTTCTTCAATCGCCCCAATTTTCAGCAGGCCCAAACGTTTCGGAAGAGGCCCATCAACC  
AACGTCAGGTCATCCTTGGACCGCACAAAGAGAACAGATGATCGCCACTAACCAACTAGATAACCGCTACTC  
TGTGAAA

CAAGTCAGAGTAACAGAAATGAGAGTGTATTTGAGTCTTGTAGCAACACCAGAAGTAGCAACTCTGAAAG  
CTTCGGCAGCCAGGTGTAGTAAGCAGATCTCTCAGTACCTTCTCTCAATGGTAAACCTTCTCTTAAAGCT  
GGTTCATC

TAACAGAAATGAGAGTGTATTTGAGTCTTGTAGCAACACCAGAAGTAGCAACTCTGAAAGCTTTCGGCAGC  
CCAGGTGTAGTAAGCAGATCTCTCAGTACCTTCTCTCAATGGTAAACCTTCTCTTAAAGCTGGTTCATCAA  
CTTGGATA

TGCCGTGACAAGTTCCTGGTTATCACGTTGCCTTCTCCTTACGACCTCAATGGCAAGGCTGTTGCAGATGT  
TTGGTCCGACTTGGAGGCTGAGTTCAAGCAACAGGCTATCTCTAAAAAGATAAAAAGTCAAATATTTGATAA  
GTCCAGAT

GTGAGAGTTTGACCTTGGCTTTAGAGTCTTATGATGGGGATGGTGGTGTAGGTGTTGATGAGGATGATGAG  
GGAGTGC GGCCGGCAGCGTGGGAGGAGCGAACGGCATGGAAGAAGCAGCGTTTTGAGACAATCGTAGTGGGA  
GTCACATT

TTATGTTATTAATGCTTCAAGAGGTACTGTGCTGGACATTCCATCTTTGATCCAAGCCGTGAAAGCCAACA  
AAATTGCAGGTGCTGCTTTGGATGTTTATCCACATGAACCAGCTAAGAACGGTGAAGGTTCAATTAACGAT  
GAGCTAAA

ATGGAGGTTGCATCAAGTGAGTCTGATGGCAATCTGGTTGGACAAAGTCCCAGAGACACAGAACAAACCT  
GCTTCTTTGCCAGCCATGCGGGCAACGGTCTGTTTCGAGCCTAACGGTGTCAACATCTTCACCGTAGACAGC  
GTCACCGA

TACTTCCGATCGTAAGCAATCACGTACCTCAACATATTTCTTTTCGCAGCACGCCACGCCTTTCCGGTGCCAA  
CTTGGAATGAAGTCTGACCTGTTCAATGGTTTTGAGATTTACTGGGTCAACAGTTATCCATTTCTTAGAGA  
ATTTGTCC

TCTTCTTCTCACCCTAAGCCATGAGAAGAAGAGGAAGATTGTAAGGTGATGGTGCAGAAGGAGAA  
GGAGAAGAGGATGGTTCTGATATGGCAGCCAATAAGTCCTTTCTCGAATCATTGCTGAATTTTGAACCTGG  
CTCAATCA

CTCGCAAGTGCATTCTTAGGCTTAATTCATATCTGCTCCTCAACTGTCGATGATGCCTGCTAAACTGCAGC  
TTGACGTACTGCGGACCCTGCAGTCCAGCGCTCGTCATGGAACGCAAACGCTGAAAACTCCAACCTTCTC  
GAGCGCTT

CAATGGATAACAATTTCTTACTTTTCTCATCTTTCAATGGTATTGACCCACGTCTGTGGTGTGTTTGTGAAG  
CTTCAACGTCGTGAAAGAGGGTTGTGACCGGCTCATTGTACATATGCTTCTCCTCTATGTGGCGTCTTCT  
TTTGAATT

GTTGACAAATCTTCTACCGGTAATAGGGTTTAAATAGGATAACCACCAAGACCTCTTAAGGATTCGGCAGCCA  
AGAATTTCCAGCTTGAGCTACGGTCATTTGGATCAATGAACCCAGTTGGATGAACTTGAATTTGGTCCATG  
TCAATCAG

AACGTACACTTTTATTACCCCCCTGTTGCCAAGTGATGTCAACTGGAAACATCATAGCTCTTCCTTTCTTGC  
CTTCCACAGTGCCCTGTTGCTGTTCTTGTGCTGTTGAAAGCCTTGATTTTGAAGTGAGTCAGGCTGCTGA  
GATGGTTG

GGACAATGACGTCCTTGTGCTGATGCATTAGATCCTCCATGATGGTAGTGGGGATGGTTTCGACATCCACG  
TCTCTCCAGTAAACCCAGGAGTGGTATGGTTTCAGGGCCACGGACCCAAGCCAATTACGAGCCCTGGCCAT  
CAGCTTTC

AACAGAACGCTGGTGAAGACGATAACGATATAATGTCACCGCTTCTGCGGATGAGGAAGCTGAATTACAA  
AGAAGGCTTCAACTGGGGTTGAGAGTGTCTCCAAGACGTAGAGAACATCTTCACGCACCTGAGGAAGTTC  
GTCGGGAC

CCGTTTGCTAAATATCCAAATCTTTGAAACTATTTATCATGCCTCCATGGAAGCTTCTTGTGAACTAGCTC  
AGAAGGACGGTCCATACGAAACTTTCCAAGGATCTCCTGCTTCTCAAGGTATACTACAGTTTGATATGTGG  
GACCAAAA

TCTCTGAGGCCTCTTAATGGCTCCGGCAAACCTCTCCTAAACTGGAAGGAGGTGGAGTTGATTGGTACAGT  
AGATACCCTCCAGGCACCAGAAGAGTCTGTGAAGAGAACAACCTCGATTTGCTTTTCAATGTTCTTCTCTC  
TTTCCAGC

ATACGGAGCTTTTTCTCTTATCTCTGTTGTTGTCTTCCCCTCTGTGGTGACTGTGTCCCTGGCCATGGTGA  
TGGTGGGAATGCATGTATGGAGAAGCACCGCTTGTGCGAGTTTCAATAGTTTGGAGAGGATGATGACGGCGA  
CGACGACG

CTGCTTCCCCAAATGGCGATGTCTTAGTCATGATCACTGGTGATCTGTTGATTGACGAAGAACAAAATCCA  
CAGCGTTTCTCTCAAGTGTTCCATTTGATTCTGATGGAAACTCTTACTACGTGTTTAAACGATATCTTCCG  
TTTGAATT

ACCTGGATCTTCTTCAAGTGCTCTAAAGAGAGATAAATCATCATCACCATCTTCTCAGAAGTATTCTCAA  
GAGCTCGCTCTCCAATGATTTGACTACGGCCTCTGGGCTGTGATGGCGGTTATCTGTGACGATATTTTGT  
GTTCTCGA

TCCAGGTGAAACAATCCAGGTTCAAGTTATCTTCTGGGTTTGACTGAAGAGCCTGCCGCAGACTTTAAGT  
GCCGTGACAAGTTCTGGTTATCACGTTGCCTTCTCCTTACGACCTCAATGGCAAGGCTGTTGCAGATGTT  
TGGTCCGA

AAGACCTCTGCCATCTCTCAAATTACCGATGGTCAAATCCAAGCTACCAAGGCTGTTTCTGAGCAAACCTGA  
AAACGGTGCTGCTAAGGCCTTTGTTGGTATGGGTGCTGGTGTGTCGCAGCTGCCGCTATGTTGTTATAAG  
TTATTGGT

AACGATGACGAGGACGAAGAAGAAGGAGCCGGCGATGATATTGAAGAGTTTATGAACGAAGAGTTCGCAGC  
ATCAGTAGTGGTAGAGAGAGAAGATGGCACAGAAGCAGTCAAAGGCAATTTGTTTAAATACACGGTAGACC  
ATTCATCC

TGATATACTACTGGGTGAAGATTTGGCTATAATGTAAGATTGAAGAGGGTGTGAGGCTCTCCGAATGGATG  
AAAAGCCGTATCTACCGAACTATTCGTGGTGGTTCCCACTGTGGAAGCTCGCCTATAAACTAAAGGTGTA  
TTGGAAG

GGGGTCTTGGTTCAAAGAATTGGTGAAGGAGTGAGAGTTTGACCTTGGCTTTAGAGTCTTATGATGGGGAT  
GGTGGTGTAGGTGTTGATGAGGATGATGAGGGAGTGCGGCCGGCAGCGTGGGAGGAGCGAACGGCATGGAA  
GAAGCAGC

GATGTTTCAGTACTGGTATACTGGCGGTTCTCAGGTCGCTGAAGCTTCAGGGTCAGTATGTGGGGGTGATGA  
TCACGGCGTCGCACAACCCATAACCAGGACAACGGGGTCAAGATCGTGGAACCAGACGGATCGATGCTTTTG  
GCCACATG

TAGTCAACATGACGTGTTCCGTTCTTATGTTTCGAGCTAATGCCTCGTCTGCTCTTCCACGTTTCAGATGTTT  
CCTTGATTGCTCAAAACACTCTCAGCAGGCCGAGATTTTCGATTTTAGCCAGCAGTACGGAAGTAATCCGAG  
CCATGAAA

CGCCTTGTTGACCAAGGCTAACAAAGCTGCAGAGAGTTCTACTGCTGCTAGGCGACTTGTGCCCAAAGCGA  
CGTACTTTAGCGTGGAAGCGCCACCGTCTATCAGGCCTGCCAAGAAGTACTGCGATGTTACTGGGTTGAAG  
GGCTTCTA

ATTGGTTGTGCCTCTGCAATTATCTTCACCTCATTAGGTGCTGCTTACGGTACTGCTAAGTCTGGTGTGG  
TATCTGTGCCACTTGTGTGTTGAGACCAGACCTATTATTCAAGAACATTGTTCTGTTATTATGGCTGGTA  
TCATTGCC

AATTCTTTACTTTTTCTCATCTTTCAATGGTATTGACCCACGTCTGTGGTGTGTTTGTGAAGCTTCAACGTC  
GTGAAAGAGGGTGTGACCGGCTCATTGTACATATGCTTCTCCTCTATGTGGCGTCTTCTTTTGAATTTG  
TCATTGCT

TCAAGAAGGCAGTTTTGCCTTATAATATCCTCATAACGGGATTAGTGTGGCCACTCTTCTGGGTTTGCAGGT  
GTACCCTATGATCAGTGGAACCTTTCAGGACCGACGAGCAAAACCGTGAATTATTGCCGGTATTCTATG  
CGTGTAAAT

CACCGTATTGAACACAGGAACCCGCCCATTTGCAATAATGAACAGTCACATGCACGCCCCATACGCCAAGC  
AGGGTGATGCCGCTACTTGTGCCACAGATCTTGTGAGGCCTGGGATTTTCAGCAGGCTCATTAAAGCTTTAC  
AGGCAGGC

CTTTTCGTGATAGTCAACATGACGTGTTCCGTTCTTATGTTTCGAGCTAATGCCTCGTCTGCTCTTCCACGT  
TCAGATGTTCCCTTGATTGCTCAAAACACTCTCAGCAGGCCGAGATTTTCGATTTTAGCCAGCAGTACGGA  
GTAATCCG

TTGGCCTTACAGCCACGGTCATTACATAAAGCAGTCATGAACAAACAACCTCAACTTCTCACCACATGACAT  
CACCAGATCTACTGTACGTGAACCTCACTTACCCAAAACCTTTGAAGCATTAAATATTTCTTGACCAGTT  
CAAGTTCT

CCCTTCTGATTCTTCCATGAATTTAAATCGTAGGGTTGAATGTTTCCAGCCAGTCTGGTAAAGGTCTCC  
AGACGTTGGGGACAATGACGTCCTTGTGCTGATGCATTAGATCCTCCATGATGGTAGTGGGGATGGTTTTCG  
ACATCCAC

ATGTCATATCAGAGTCCGCTGAGGATGAATCAGTAAATGTATTACCTGACTCAGGTGATGGAGTGCTCAGA  
GGCGTTCCAACCTGATGATGGATACTGCGGAAACTGTGATTGTGGCCAGGTGGAAAGTACATAGGCGACAT  
TTGATAAG

TTCAAGTTATCTTCTGGGTTTACTGAAGAGCCTGCCGCAGACTTTAAGTGCCGTGACAAGTTCTGGTT  
ATCACGTTGCCCTTCTCCTTACGACCTCAATGGCAAGGCTGTTGCAGATGTTTGGTCCGACTTGGAGGCTGA  
GTTCAAGC

TCTTTCAAGCTTCGTGGTGCCTATAACATGATTGCCAAGTTGGACGATTCTCAAAGAAACCAGGGTGTAT  
TGCCTGTTTCAGCTGGGAATCATGCCAAGGTGTGGCCTTTGCTGCTAAACACTTGAAAATACCTGCTACTA  
TCGTTATG

TGTCATATCAGAGTCCGCTGAGGATGAATCAGTAAATGTATTACCTGACTCAGGTGATGGAGTGCTCAGAG  
GCGTTCCAACCTGATGATGGATACTGCGGAAACTGTGATTGTGGCCAGGTGGAAAGTACATAGGCGACATT  
TGATAAGG



CCAACACTAGTGCTACTACCACTGCTAGCACCAACTCCAGCACTAATGCCACTACCACTGCTAGCACCAAC  
TCCAGCACTAATGCCACTACCACTGAAAGTACCAACGCTAGTGCCAAGGAGGACGCCAATAAAGATGGCAA  
TGCTGAGG

ATGCTTCCTGTCTTCTTCCCTCACCCTAAGCCATGAGAAGAAGAGGAAGATTGACTGAAGGTGATGGTGC  
AGAAGGAGAAGGAGAAGAGGATGGTTCTGATATGGCAGCCAATAAGTCCTTTCTCGAATCATTGCTGAATT  
TTGAAACT

AGATCTTCTTCAATCGCCCCAATTTTCAGCAGGCCCAAACGTTTCGGAAGAGGCCCATCAACCAACGTCAGGT  
CATCCTTGGACCGCACAAAGAGAACAGATGATCGCCACTAACCAACTAGATAACCGCTACTCTGTGGAAAGA  
GCGAGAAC

GCACAATCCAGTTTCGTAATCTCCTTCGAATGAACCCATAACAACCTTCAAGCAGTCTATTGAGTCAATTGA  
CACAGGACACCGATAATCGATCAATGCTCTCCAATCACATCTCATCGAACAACGAAAACAAGCAACAGCCT  
TCTTCATA

GATGAACTGCTCGAAACGGATACTGTCCTTGAAATTTCCATGTCTCCTGTGTTTACAGAAGGCATGATTCT  
TCGAGAGGACTTAAGTCTGTTGGCGGTCTTGAAAAGCTCTTTGATGGATGTGAAGTTTGAGAAAGAAGCG  
AAGCACTG

CTCAGCTAATTTCTTCAAATTGTTAGATAAGGCAGAAACAATTTTCGAAACCTGGAGGCAACTTCCAGACG  
ATCTGTGAGTTCTTGCCACAGAGTGGCCACCAATTGAGCCAATAGGTCCAATTTCAAATCAAATTCGTTT  
TTCAACCA

TAGTAGAAATGAAGAAAGCGTCTTCGGCAGATAAGTTCTCTACGGATTGAAGTTGTGCCTGCTGGACGTTT  
TCCTTGTGAAATCGATCTCTTCTTGAGGGGCACCTCTCTTGAAGACTATAATGTAGCGGTTGGGGATGAT  
CTTGGAGA

AGACAGGCATAAGGAGAAGGTTGAAATTTCTAAGGAGATCAGATCCATTTTCCAGATTGGAGGAAGGTGAA  
CTTGGAACAGACGTAGATGGCTTCAAAGATGTGTACAGGATGAAGAGTAGCAGTATGTTTGATCTTGGTAA  
GAGTTCAG

CATGAATGAAGATACATCCTGGCACACCGCTCTTGGTGCTCAGCTCTTCTGCTCTGAGGCCTCTTAATGGC  
TCCGGCAAACCTCTCCTAAACTGGAAGGAGGTGGAGTTGATTGGTACAGTAGATACCCTCCAGGCACCAGA  
AGAGTCTG

TAGGCAAACGAACCTTCTTCTGGATCTAACGAATACTTTAGGAATGAATCCATACTTCTCCTCATCATTAGA  
CCGAACGATGGGGTCTTGGTTCAAAGAATTGGTGAAGGAGTGAGAGTTTGACCTTGGCTTTAGAGTCTTAT  
GATGGGGA

TAGGTCATGTTTCGTACCATGGCAACTTTAAAAACAACCTGATAAGAAGGCCCTGAGGACATCGAGGGCTCG  
GACACAGTGCAAATGAGTTGCCTGAATCTTCTTTCGAGTCGTATATGCTAGAGCCTCCAGACTTGTCTTA  
TGAGACTT

GAAGCCCAAAGCTCAATCGGTATTGAAGTGGCTACCGCATTGTCCAAATACATCAATGAAGGTAACCTCTGT  
CGGTTTCAGTCAACTTCCAGAAGTGGCATTGAAATCATTGTCTTACGACCAAGAGAACACTGTGCGTGTGT  
TATACATT

CGAAAGTACCGACTCCAACACTAGTGCTACTACCACCGAAAGTACCGACTCCAACACTAGTGCTACTACCA  
CTGCTAGCACCAACTCCAGCACTAATGCCACTACCACTGCTAGCACCAACTCCAGCACTAATGCCACTACC  
ACTGAAAG

GTAGGGTTGAATGTTTCCAGCCAGTCTGGTAAAGGTCTCCAGACGTTGGGGACAATGACGTCCTTGTCTGT  
GATGCATTAGATCCTCCATGATGGTAGTGGGGATGGTTTCGACATCCACGTCTCTCCAGTAAACCCAGGAG  
TGGTATGG





GAAGATTGGTAACCTATTGCATCCAAACCAGAAGTAATACAACCAGAATGTGGAGATGAGGAGCCAACAGG  
TGTGTATCCAGAAGGTTCCAGCCACAGGTTGGTCATCAATACCACTGGGGGAGCATGCAATATAATCAGATG  
GTTGCGAG

AGCCTGGTCTGCCTGTTGACGAGAACTCTTCTCATTGTTAACACCTGGTGGAGGACCTTTGGGTCTTGGCC  
ATGTTGTTCCCCTTGGTGGTTCCTCACTGAGAGCTGTTTCGTAGATAAATCTACATAATACCAAGTCTGGTAT  
TCATCATC

GAGGTTGAATGTAGAAACACTAGGTGTTTCTGTGCACAGGGCGGTTTCGTTCGATGTTGAGGAAGTCTGTG  
ATCTTTCAAATGTGGGTGACGTGCTCACTTGGGGCGTGTTCAGTGGGGATCTGTCATGAGGGTGAGTGTA  
TGCGTGTG

AAGGTGGAGGAGCCTGGTCTGCCTGTTGACGAGAACTCTTCTCATTGTTAACACCTGGTGGAGGACCTTTG  
GGTCTTGGCCATGTTGTTCCCCTTGGTGGTTCCTCACTGAGAGCTGTTTCGTAGATAAATCTACATAATACCA  
AGTCTGGT

CGATGTTGAGGAAGTCTGTGATCTTTCAAATGTGGGTGACGTGCTCACTTGGGGCGTGTTCAGTGGGGA  
TCTGTTCATGAGGGTGAGTGTATGCGTGTGTGTGTGTTGCGTAGATGTGTGATTTACTATGTGTTATGTA  
GCTGCTCT

TAGGTGTTTCTGTGCACAGGGCGGTTTCGTTCGATGTTGAGGAAGTCTGTGATCTTTCAAATGTGGGTGAC  
GTGCTCACTTGGGGCGTGTTCAGTGGGGATCTGTCATGAGGGTGAGTGTATGCGTGTGTGTGTGTTGCG  
GTAGATGT

GAAGTCTGTGATCTTTCAAATGTGGGTGACGTGCTCACTTGGGGCGTGTTCAGTGGGGATCTGTTCATGA  
GGGTGAGTGTATGCGTGTGTGTGTGTTGCGTAGATGTGTGATTTACTATGTGTTATGTAGCTGCTCTCA  
TCGCTGCT

CCACACCCACACACCACACCACACCACACCACACCACACCACACCACACCACACCACACCACACCACACCAC  
CACCCACACCCTAATTCTACCTCAACCCTACCCTAATCCAACCCTTCCATCCTGTCTCTCAACTTACCCTC  
CATTACCC

TGGGCCCTGCTTGCACCTTGCCTGTTGATTGAGAAGAATAAGGTGGAGGAGCCTGGTCTGCCTGTTGACG  
AGAAGTCTTCTCATTGTTAACACCTGGTGGAGGACCTTTGGGTCTTGGCCATGTTGTTCCCCTTGGTGGT  
CCCCTGA

TGCTCCAAGTGCACAACCTCCACCACTCCGCTGTGGAGGAAGGACCCCAAGGGTCTTCCCCTGTGCAATGC  
TTGCGGCCTCTTCTCAAGCTCCACGGCGTCACAAGGCCTCTGTGCTTGAAGACTGACATCATTAAGAAGA  
GACAGAGG

CGGGTCTTTGGCCAAGAGTTTCTTCTTCAATCTGTACTTGTGGAAAGCAGACCAGCCTTCAACAATGGTTT  
GTCAACTCTACCACCACCGCAATGACACCGATGACACCTCTGGCATCAGAAGAGATAACCTTCTTGGCAC  
CGGATGGT

ACAGCACCTCTAGAGATGGTAGAAGCCTTACCAATATGTTGATGGTTACCACCACCGTGAGGGTGATCAAC  
TGGATTCATGGCAACACCACGGGTCTTTGGCCAAGAGTTTCTTCTTCAATCTGTACTTGTGGAAAGCAGAC  
CAGCCTTC

CTTGCACCTTGCCTGTTGATTGAGAAGAATAAGGTGGAGGAGCCTGGTCTGCCTGTTGACGAGAACTCTTC  
TCATTGTTAACACCTGGTGGAGGACCTTTGGGTCTTGGCCATGTTGTTCCCCTTGGTGGTTCCTCACTGAG  
GCTGTTCCG

ACACGAGTTGTCGTCGAGAACAGGATGTACTGATAGGACGTTTTCTCCACTGCCACCAATTGACATCTCAG  
TGCTCTTCAGCACCTCTTTGGTTTTGGGTTGTGGTGGTGGCAAACCTGAAGCTTTTCGTTACTATCAGAGGAC  
TCTATTGT

ATATCGATGAAGATGACGACATGTCATCTTACAACGACAAAGCAGCCTCGGTAGCGCACACCAGAGTCCTC  
AATTCCTTGCATCTGTCCACCGACAGCAATACCGCCCACGAGACGTCCAATGCAAACGACAACCACAACC  
CTTCTACA

TTCATTAAGTGAAGATTGGTAACCTATTGCATCCAAACCAGAAGTAATACAACCAGAATGTGGAGATGAGG  
AGCCAACAGGTGTGTATCCAGAAGGTTCCAGCCACAGGTTGGTCATCAATACCACTGGGGGAGCATGCAATA  
TAATCAGA

TACTCCGCTTTCGAACACCTCATCCAATCCGGATATAAAAATGCTCCAACCTGCACAACCTCCACCACTCCGC  
TGTGGAGGAAGGACCCCAAGGGTCTTCCCCTGTGCAATGCTTGCAGCCTCTTCTCAAGCTCCACGGCGTC  
ACAAGGCC

CTGTACTTGTGGAAAGCAGACCAGCCTTCAACAATGGTTTTGTCAACTCTACCACCACCGGCAATGACACC  
GATGACACCTCTGGCATCAGAAGAGATAACCTTCTTGGCACCAGGATGGTAATCTGACTCTAGTCTTGT  
CGTCTGGG

CTGTTTCAATTCCGGTGATGGCAAAGGTCGGTATTGGACACTTCGTGGAGGCACAGATCCTGGAAGAGCTG  
CAAGTAGACTACATTGACGAAAGTGAGGTTTTGACTCCAGCTGATTGGACACATCACATTGAGAAGCATAA  
CTTCAAGG

TAGAGATGGTAGAAGCCTTACCAATATGTTGATGGTTACCACCACCGTGAGGGTGATCAACTGGATTTCATG  
GCAACACCACGGGTCTTTGGCCAAGAGTTTTCTTTCAATCTGTACTTGTGGAAAGCACGACCAGCCTTCAA  
CAATGGTT

CCAATATGTTGATGGTTACCACCACCGTGAGGGTGATCAACTGGATTTCATGGCAACACCACGGGTCTTTGG  
CCAAGAGTTTTCTTTCAATCTGTACTTGTGGAAAGCACGACCAGCCTTCAACAATGGTTTTGTCAACTCTAC  
CACCACCG

CATCCAATCCGGATATAAAAATGCTCCAACCTGCACAACCTCCACCACTCCGCTGTGGAGGAAGGACCCCAAG  
GGTCTTCCCCTGTGCAATGCTTGCAGCCTCTTCTCAAGCTCCACGGCGTCACAAGGCCTCTGTGCTTGAA  
GACTGACA

AACGATAACGATATCGATGAAGATGACGACATGTCATCTTACAACGACAAAGCAGCCTCGGTAGCGCACAC  
CAGAGTCCTCAATTCCTTGCATCTGTCCACCGACAGCAATACCGCCCACGAGACGTCCAATGCAAACGACA  
ACCACAAC

GATATGAATATGACTATGAACATGAACCTTCAACACGCCTCAACCTCCTCCTTCAACAATGAAGCCTTCTG  
GAAGCCTTTGGACTCCGCAATAGATCATCATTCTGGAGACACAAATCCAAACTCAAACATGAACACCACTC  
CAAATGGC

TCTCTTCAATCTGTACTTGTGGAAAGCAGACCAGCCTTCAACAATGGTTTTGTCAACTCTACCACCACCGG  
CAATGACACCGATGACACCTCTGGCATCAGAAGAGATAACCTTCTTGGCACCAGGATGGTAATCTGACTCTA  
GTCTTGTT

GAGGCGGAAACGTTCTCCAGCTTTCCGCTGATATGAATATGACTATGAACATGAACCTTCAACACGCCTC  
AACCTCCTCCTTCAACAATGAAGCCTTCTGGAAGCCTTTGGACTCCGCAATAGATCATCATTCTGGAGACA  
CAAATCCA

TGAGAAGAATAAGGTGGAGGAGCCTGGTCTGCCTGTTGACGAGAACTCTTCTCATTGTTAACACCTGGTGG  
AGGACCTTTGGGTCTTGGCCATGTTGTTCCCCTTGGTGGTTCCCACTGAGAGCTGTTCTGTAGATAAATCTA  
CATAATAC

ACACCACACCCACACCACACCACACCACACCACACCACACCACACCACACCACACCACACCACACCACACC  
CTAATTCTACCTCAACCCTACCCTAATCCAACCCTTCCATCCTGTCTCTCAACTTACCCTCCATTACCCTG  
CCTCCCA

GACCCACACTATCCGTTGCCACAGTATATCCCACCACTGAGTACTTCCCTCACCTGATCCAATCGATTACACA  
GAATCAACACTCTGAAGTACCTCAAGCTGAGACAAAGGTGAGAAATAACGTCTTACCACCACACACTTTAA  
CATCAGAA

TCGAACACCTCATCCAATCCGGATATAAAAATGCTCCAACCTGCACAACCTCCACCACTCCGCTGTGGAGGAA  
GGACCCCAAGGGTCTTCCCCTGTGCAATGCTTGCGGCCTCTTCCCTCAAGCTCCACGGCGTCACAAGGCCTC  
TGTCGTTG

GGATATAAAAATGCTCCAACCTGCACAACCTCCACCACTCCGCTGTGGAGGAAGGACCCCAAGGGTCTTCCCC  
TGTGCAATGCTTGCGGCCTCTTCCCTCAAGCTCCACGGCGTCACAAGGCCTCTGTGTTGAAGACTGACATC  
ATTAAGAA

TTCACTATTATCGATTTGCCCTCAAAGTAGCTGTCTTGGCCACACTGTCACAAATGTCCCAATTGGGGT  
TTCAGATTGCAAAGTGACCAAAGCGGCAGTAATTTGGTGTGGAGCAAAGGAATACACTTTCTCCTGTACA  
CCTTGGAC

GCAATGGCCTTCAAATGCATATCTCTACTATCGGCTAAAAAACGAATGACTCACGTTATCAGGCTCATAGC  
TTGTGTGTGTGTGTGTGTGTGTGTGTGTGTGTGTGTGTGTGTGTGTGTGTGTGTGTGTGTGTGTGTGTGATTGTTGT  
TCTAGTCG

CGTTCTCCAGCTTTCCGGCTGATATGAATATGACTATGAACATGAACCTTCAACGCCTCAACCTCCTCC  
TTCAACAATGAAGCCTTCTGGAAGCCTTTGGACTCCGCAATAGATCATCATTCTGGAGACACAAATCCAAA  
CTCAAACA

CTGTGCACAGGGCGGTTTCGTCGATGTTGAGGAAGTCTGTGATCTTTCAAATGTGGGTGACGTGCTCACTT  
GGGGCGTGTTCAGTGGGGATCTGTGCATGAGGGTGTGTGTGTGTGTGTGTGTGTGTGTGTGTGTGTGTGTGTGTGATTGTTGT  
GATTTACT

GGCAACACCACGGGTCTTTGGCCAAGAGTTTCTCTTCAATCTGTACTTGTGGAAAGCACGACCAGCCTTCA  
ACAATGGTTTGTCAACTCTACCACCACCGGCAATGACACCGATGACACCTCTGGCATCAGAAGAGATAACC  
TTCTTGGC

CTGAGGCTGTTGAGGCTGATAGTAACGAGGTTGCTGTGCTTGGGCCCTGCTTGCACCTGCGGTGTTGATT  
GAGAAGAATAAGGTGGAGGAGCCTGGTCTGCCTGTTGACGAGAACTCTTCTCATTGTTAACACCTGGTGGA  
GGACCTTT

ATGCTATATGTCCCTACGGCCTTGTCTAACACCATCCAGCATGCAATACAGTGACATATATATATACCCACAC  
ACCCACACACACCACACCCACACACCCACACACCCACACACCCACACACCCACACACCCACACACCCACACCC  
CACCACAC

TTCTCAACAAGAGACAACACCTGGGACATCAGCTGTTCCAGAGAACCATCATCATGTCTCTCCTCAACCTG  
CTTCAGTACCACCTCCACAGAATGGACAGTACCAACAGCACGGCATGATGACCCCAACAAAGCTATGGCC  
TCTAAGT

TCGTCGAGAACAGGATGTACTGATAGGACGTTTTTCTCCACTGCCACCAATTGACATCTCAGTGCTCTTCAG  
CACCTCTTTGGTTTGGGTTGTGGTGGTGGCAAACCTGAAGCTTTTCGTTACTATCAGAGGACTCTATTGTAA  
TCTTTTCA

CGGTGTTGATTGAGAAGAATAAGGTGGAGGAGCCTGGTCTGCCTGTTGACGAGAACTCTTCTCATTGTTAA  
CACCTGGTGGAGGACCTTTGGGTCTTGGCCATGTTGTTCCCCTTGGTGGTTCCTACTGAGAGCTGTTTCGTA  
GATAAATC

GATGGTTACCACCACCGTGAGGGTGTCAACTGGATTTCATGGCAACACCACGGGTCTTTGGCCAAGAGTTT  
CTCTTCAATCTGTACTTGTGGAAAGCACGACCAGCCTTCAACAATGGTTTGTCAACTCTACCACCACCGGC  
AATGACAC

CGAATAGCAAGGTAGCTTCCATCCTGTACATGCAAGACCGTCACACAGCATGTCATCGGAAGAACCCCATG  
CATCTATATCCTTTCCAGATGGCTCACATGTCCGGTCTGCTCCACTGGTACTTCATCTGTGAACACAATC  
GATGCTAC

CAATAACGATAACGATAACGATATCGATGAAGATGACGACATGTCATCTTACAACGACAAAGCAGCCTCGG  
TAGCGCACACCAGAGTCTCAATTCTTGCATCTGTCCACCGACAGCAATACCGCCCACGAGACGTCCAAT  
GCAAACGA

ACACCCACACCCTAATTCTACCTCAACCCTACCCTAATCCAACCCTTCCATCCTGTCTCTCAACTTACCCT  
CCATTACCCTGCCTCCCCACTCGTTACCCTGCCTCCCCACCACCAACCACAAATCCACCATAACAGTTAC  
CCTCCAAT

CTGTTCTTCTTCTGATAGCTTCTTGGATAGTTGACTGGTATCCGTTGCTTTCAATGGAGGAACTGAACCGT  
TTGCTTGACTTCTTTCGTCAAATCTGAATCACTCTCTGTCTGTTCAAGATACAGATCTCTTAATTTCTGG  
ATCTTCAT

CGGTATGGACAATCTGAAGGCAGTGCAGGAAGATGAAGATGAAGGGGTGACAGTTTTCGAGGGCCCTGAGGG  
GAATTCTACAGGAAATGTCTCAGGAAGGGACGCATCACTTGACAATAGCGTCGAACATAGAAAGTTTGGTG  
CTGCAGCC

GCACAACCTCCACCCTCCGCTGTGGAGGAAGGACCCCAAGGGTCTTCCCCTGTGCAATGCTTGCGGCCTC  
TTCCTCAAGCTCCACGGCGTCACAAGGCCTCTGTGTTGAAGACTGACATCATTAAGAAGAGACAGAGGTC  
GTCTACCA

AGTTTATGTTTATATACACCGGTGTAGGCTGTGCGTTGGTGTGAACACTTCCCTGTTGCTGTTGCTGTTGAA  
GCCGTCTCCGCATGCAACTGTAGTCATACAGCCTCTTGTCTGCCCTTATTCAATTGACCAGCTAACAATAG  
CTTCGCTT

AGAAGCCTTACCAATATGTTGATGGTTACCACCACCGTGAGGGTGATCAACTGGATTTCATGGCAACACCAC  
GGGTCTTTGGCCAAGAGTTTCTTCTTCAATCTGTACTTGTGGAAAGCACGACCAGCCTTCAACAATGGTTTG  
TCAACTCT

CACAACGCCTCAACCTCCTCCTTCAACAATGAAGCCTTCTGGAAGCCTTTGGACTCCGCAATAGATCATCA  
TTCTGGAGACACAAATCCAACTCAAACATGAACACCACTCCAATGGCAATCTGAGCCTGGATTGGTTGA  
ATCTGAAT

CAGTTGTTTGGTATAGAAGCCGGTATGGACAATCTGAAGGCAGTGCAGGAAGATGAAGATGAAGGGGTGAC  
AGTTTCGAGGGCCCTGAGGGGAATTCTACAGGAAATGTCTCAGGAAGGGACGCATCACTTGACAATAGCGT  
CGAACATA

CATGGAACAGACACGAGTTGTCGTCGAGAACAGGATGTAAGTACTGATAGGACGTTTTCTCCACTGCCACCAATT  
GACATCTCAGTGCTCTTTCAGCACCTCTTTGGTTTTGGGTTGTGGTGGTGGCAAACCTGAAGCTTTCTGTTACT  
ATCAGAGG

CCAATTTACCGGAATTTGATAGAGATTCCACTAAGGTTAATTCTCAACAAGAGACAACACCTGGGACATCA  
GCTGTTCCAGAGAACCATCATCATGTCTCTCCTCAACCTGCTTCAGTACCACCTCCACAGAATGGACAGTA  
CCAACAGC

GGAAAGCACGACCAGCCTTCAACAATGGTTTTGTCAACTCTACCACCACCGGCAATGACACCGATGACACCT  
CTGGCATCAGAAGAGATAACCTTCTTGGCACCGGATGGTAATCTGACTCTAGTCTTGTCTTCTGCTGGGTT  
GTGACCGA

GAAATCGGTATGGGTATTTCATAACGAGTCTGGTACCTATAAGTCTTCTCCGCTGCCATCGATTTCTGAGCT  
CGTTTCCAGATGCTTCTTCTTCTCGATGAGGATGAAGACCGTTCTTATGTGAAGTTTGGACCCAAAG  
AGGACGTA

TTGACCAGAAACAGCACCTCTAGAGATGGTAGAAGCCTTACCAATATGTTGATGGTTACCACCACCGTGAG  
GGTGATCAACTGGATTTCATGGCAACACCACGGGTCTTTGGCCAAGAGTTTCTCTTCAATCTGTACTTGTGG  
AAAGCACG

AGAGATTCCACTAAGGTTAATTCTCAACAAGAGACAACACCTGGGACATCAGCTGTTCCAGAGAACCATCA  
TCATGTCTCTCCTCAACCTGCTTCAGTACCACCTCCACAGAATGGACAGTACCAACAGCACGGCATGATGA  
CCCCAAAC

GGAATTTGATAGAGATTCCACTAAGGTTAATTCTCAACAAGAGACAACACCTGGGACATCAGCTGTTCCAG  
AGAACCATCATCATGTCTCTCCTCAACCTGCTTCAGTACCACCTCCACAGAATGGACAGTACCAACAGCAC  
GGCATGAT

CACCACTCCGCTGTGGAGGAAGGACCCCAAGGGTCTTCCCCTGTGCAATGCTTGCGGCCTCTTCTCAAGC  
TCCACGGCGTCACAAGGCCTCTGTCTGTTGAAGACTGACATCATTAAAGAAGAGACAGAGGTCTGTCTACCAAG  
ATAAACAA

ATTGTTTTAAATGAACCTTTCACTAAAGCAGTTCTTACGAACGGTTTCGCTGAGAAACATTATCTGTTGTGA  
TTCTGATCTCTCACTAGCTTCTTGCTGTTGAGACTGTGGTGTGGTAGATGTCAATTGCTGTGATTGCGGGC  
TAGACTTT

GCTTTGTATCAAGAAACCAAGATTACGTATAGGCTACTTCACTCAACATCATGTGGATTCTATGGATTTG  
ACCACGTCTGCAGTGGACTGGATGTCAAATCCTTCCCAGGTAAAACCTGATGAAGAGTATAGACGTCATCT  
AGGTTTCA

CTTTCGGCCTGATATGAATATGACTATGAACATGAACCTTCAACAACGCCTCAACCTCCTCCTTCAACAATG  
AAGCCTTCTGGAAGCCTTTGGACTCCGCAATAGATCATCATTCTGGAGACACAAATCCAACTCAAACATG  
AACACCAC

TTATCAACCCGACCCACACTATCCGTTGCCACAGTATATCCCACCACTGAGTACTTCCCTCACCTGATCCAA  
TCGATTACAGAATCAACACTCTGAAGTACCTCAAGCTGAGACAAAGGTGAGAAATAACGTCTTACCACCA  
CACACTTT

ACCCTGCAAAATAGACCTTTACTCTTTAGAATAGGCAAAAACCTGCAGCCACACCACCGGCGGAGGCTGATGC  
AGCTGCTTCTGCACCTTCTACCAAGAGGCCAGCAGAAACGGAGACGTTACCACCCAACGTGATGGTCCCAA  
ATTCAGAA

TCGAAGACAACAATAACGATAACGATAACGATATCGATGAAGATGACGACATGTCATCTTACAACGACAAA  
GCAGCCTCGGTAGCGCACACCAGAGTCCTCAATTCTTGCATCTGTCCACCGACAGCAATACCGCCCACGA  
GACGTCCA

CTGTAATCCATGTGGCAAGTCCACCGTAATTGTCTTTGCCCTGTTGACCTGAACACCCTCACCATGGCACT  
TGGTACAATTGTCTGAGGCCGTTTTATGGTACCTTACCCTGCAAGTAGGACAAGTCGACATCATCTGA  
AATCCGCC

GTCGACACGAATTCTCACAAAATATCACCTCTTGATAACTTGACTGAATCTTTCAAGTCCGCCTCTACAG  
CGATGTCAGGGTATGAGCCTTGGCCAGGGATCCTGACCACGTGCGCGTCTGTAATCCATGTGGCAAGTCC  
ACCGTAAT

ACCACCGTGAGGGTGATCAACTGGATTTCATGGCAACACCACGGGTCTTTGGCCAAGAGTTTCTCTTCAATC  
TGTAATTGTGGAAAGCACGACCAGCCTTCAACAATGGTTTGTCAACTCTACCACCACCGCAATGACACCG  
ATGACACC

AGCACCATCATGGATCAATTCTGTTCTGCACTTGTGGAGAGTTCAAGGACTTGAATTTGGCATCACAAT  
GCTTCTGGACCAAAGAGGTGAGTTTCTCAGAATCCATGTCGGGGACGGTTCTAATGGAAAACCTTACCGAAG  
ACCTTAGC



TGTCATCGGAAGAACCCCATGCATCTATATCCTTTCCAGATGGCTCACATGTCCGGTCGTCCTCCACTGGT  
ACTTCATCTGTGAACACAATCGATGCTACCTTATCCAGACCGAACTATATTAAGAAACCGTCCCTGCACAT  
TATGTCGA

GATCTCGCAAGTGCATTCTAGACTTAATTCATATCTGCTCCTCAACTGTTCGATGATGCCTGCTAAACTGC  
AGCTTGACGTACTGCGGACCCTGCAGTCCAGCGCTCGTCATGGAACGCAAACGCTGAAAACTCCAACTTT  
CTCGAGCG

TTGCTGTGCTTGGGCCCTGCTTGCACCTTGCAGTGTGATTGAGAAGAATAAGGTGGAGGAGCCTGGTCTG  
CCTGTTGACGAGAACTCTTCTCATTGTTAACACCTGGTGGAGGACCTTTGGGTCTTGGCCATGTTGTTCC  
CTTGGTGG

GTGAGAATACATGACCGAAGGAATGTTGTTATAGTTGACATGACCGTGACCAGTTTTCAACATTTTCGACAG  
CTGCAATACCTTCTTCCGGCTTTGTGAGCCAGCATTGGACCAAATGTAACATCTCCTACCACCTTAATG  
TGTGGGAA

TGAGGCTGATAGTAACGAGGTTGCTGTGCTTGGGCCCTGCTTGCACCTTGCAGTGTGATTGAGAAGAATA  
AGGTGGAGGAGCCTGGTCTGCCTGTTGACGAGAACTCTTCTCATTGTTAACACCTGGTGGAGGACCTTTGG  
GTCTTGGC

TACTTCCTAGATGCTATATGTCCCTACGGCCTTGTCTAACACCATCCAGCATGCAATACAGTGACATATAT  
ATACCCACACACCCACACACACCACACCCACACACCCACACACCCACACACCCACACACCCACACACCCACAC  
ACCACACC

ATCCTGTACATGCAAGACCGTCACACAGCATGTCATCGGAAGAACCCCATGCATCTATATCCTTTCCAGAT  
GGCTCACATGTCCGGTCGTCCTCCACTGGTACTTCATCTGTGAACACAATCGATGCTACCTTATCCAGACC  
GAACTATA

CACACCACACCACACCCACACCACACCCACACCACACCCACACCACACCCACACCACACCCACACCCTAATTCTAC  
CTCAACCCTACCCTAATCCAACCCTTCCATCCTGTCTCTCAACTTACCCTCCATTACCCTGCCTCCCCACT  
CGTTACCC

TCACACAGCATGTCATCGGAAGAACCCCATGCATCTATATCCTTTCCAGATGGCTCACATGTCCGGTCGTC  
CTCCACTGGTACTTCATCTGTGAACACAATCGATGCTACCTTATCCAGACCGAACTATATTAAGAAACCGT  
CCCTGCAC

GGTATGAGCCTTGGCCAGGGATCCTGACCACGTCGCCGTCCTGTAATCCATGTGGCAAGTCCACCGTAATT  
GTCTTTGCCCTGTTGACCTGAACACCCTCACCATGGCACTTGGTACAATTGTCCTGAGGCCGTTTCATGGT  
ACCTTCAC

GTCTACCTATTAATGACGATGACGTACAAAGTATAATGACCTCAGGTGAAGATTCTAAATTGTTCAATTC  
TACACCCACCACCACCGAAGATGGCCATCCCAGCAACAAAGCAAGGCGGATCGCTGGAAATCTCATTCG  
ATTCGGAA

ATTCTCACAAAATATCACCTCTTGATAACTTGACTGAATCTTTCAAGTCCGCCTCTACAGCGATGTCAGG  
GTATGAGCCTTGGCCAGGGATCCTGACCACGTCGCCGTCCTGTAATCCATGTGGCAAGTCCACCGTAATTG  
TCTTTGCC

AATGGATCAGAAACCAATAAGCACCATCATGGATCAATTTCTGTTCTGCACCTGTTTGGAGAGTTCAAGGA  
CTTGAATTTGGCATCACAATGCTTCTGGACCAAAGAGGTGAGTTTCTCAGAATCCATGTCGGGGACGGTTC  
TAATGGAA

GGTAGCTTCCATCCTGTACATGCAAGACCGTCACACAGCATGTCATCGGAAGAACCCCATGCATCTATATC  
CTTTCCAGATGGCTCACATGTCCGGTCGTCCTCCACTGGTACTTCATCTGTGAACACAATCGATGCTACCT  
TATCCAGA

TGATCTAGAAACTGGGGATGGCAGCTTTGACTTAAACGAAGAGATCATTCCACTGAAGAACGAGGACGTCC  
AAGAAGTCTTTGATTGATCGTGCTTGATCTCTGTAGGGTGTTCATCGGCGGCACCTTTGGTTTGTAATCACT  
ACTAAATT

CGTCGCCGTCTGTAAATCCATGTGGCAAGTCCACCGTAATTGTCTTTGCCCTGTTGACCTGAACACCCTCA  
CCATGGCACTTGGTACAATTGTCCTGAGGCCGTTTCATGGTACCTTCACCGTTGCAAGTAGGACAAGTCGA  
CATCATCT

ATCCAAACCAGAAGTAATACAACCAGAATGTGGAGATGAGGAGCCAACAGGTGTGTATCCAGAAGGTTCCAG  
CCACAGGTTGGTCATCAATACCACTGGGGGAGCATGCAATATAATCAGATGGTTGCGAGGAATAGCTAGTA  
GAGCTAAA

AAAACATTTTGAATAGCAAGGTAGCTTCCATCCTGTACATGCAAGACCGTCACACAGCATGTCATCGGAA  
GAACCCCATGCATCTATATCCTTTCCAGATGGCTCACATGTCCGGTCGTCTCCACTGGTACTTCATCTGT  
GAACACAA

TCTGATAGCTTCTTGGATAGTTGACTGGTATCCGTTGCTTTCAATGGAGGAACTGAACCGTTTGCTTGACT  
TCCTTCGTCAAATCTGAATCACTCTCTGTCTGTTCAAGATACAGATCTCTTAATTTCTGGATCTTCATGT  
TTAATCTG

GAAAAGAAGGAGTTTATGTTTATATACACCGGTGTAGGCTGTGCGTTGGTGTGAACACTTCCTGTTGCTGT  
TGCTGTTGAAGCCGTCTCCGCATGCAACTGTAGTCATACAGCCTCTTGTCTGCCCTTATTCAATTGACCAG  
CTAACAAT

TGACTATGAACATGAACCTTCACAACGCCTCAACCTCCTCCTTCAACAATGAAGCCTTCTGGAAGCCTTTG  
GACTCCGCAATAGATCATCATTCTGGAGACACAAATCCAAACTCAAACATGAACACCACTCCAAATGGCAA  
TCTGAGCC

TCTTAGAGACGTAAGCGGGCTTCACTATTATCGATTTGCCCTCAAAGTAGCTGTCTTGGCCACACTGTCA  
CAAATGTCCCAATTGGGGTTTCCAGATTGCAAAGTGACCAAAGCGGCAGTAATTTGGTGTGGAGCAAAAGG  
AATACT

CTCGTCTGCTGCCGCTTCCAGATCGCTATCTCCATTACTAAACGTTCCAGCACCAGAGGATGGCAGGGAGA  
GAATCTTACCTCAGAGTGCTCTTGGTCCCAATAGTGGCTCTGTGCCAGGAGTACATAGTAACGTATCACCT  
GTTTTACT

CTGGATTTCATGGCAACACCACGGGTCTTTGGCCAAGAGTTTCTCTTCAATCTGTACTTGTGGAAAGCACGA  
CCAGCCTTCAACAATGGTTTGTCAACTCTACCACCACCGCAATGACACCGATGACACCTCTGGCATCAGA  
AGAGATAA

CACATTTGTTGGAAGGTAGTCAAAGAAGCCAAGATAGAACCACCAATCCAGACGGAGTACTTTCTTTCTGG  
AGGAGCAATGATCTTGACCTTCATGGAAGATGGAGCCAAGCGGTGATTTCTTTTTGCATTCTTTTCGGCAA  
TACCTGGG

GGTCTTTGGAATATCAGATTCTCGATCTACAACCTTCTTAAACAGTGGGTTTGCCATGTGTGCCCAAAAC  
CTGTGGCCAAGGTGGGAGACGAATACGTAACACCTAGAAGATTTACGTATCTTAGGAATTGATCACCATTA  
GACTGTAC

TTGGCCAGGGATCCTGACCACGTGCGCGTCTGTAAATCCATGTGGCAAGTCCACCGTAATTGTCTTTGCC  
TGTTGACCTGAACACCCTCACCATGGCACTTGGTACAATTGTCCTGAGGCCGTTTCATGGTACCTTCACCG  
TTGCAAGT

CAACCTCCTCCTTCAACAATGAAGCCTTCTGGAAGCCTTTGGACTCCGCAATAGATCATCATTCTGGAGAC  
ACAAATCCAAACTCAAACATGAACACCACTCCAAATGGCAATCTGAGCCTGGATTGGTTGAATCTGAATTT  
ATAGATCC

ACCTTTGAAATTATCCAACATGATAACGTCTGCACCAGCTTCAATGGCCTCTGTGGCTTCATCTTCACTCA  
AACACTCCACTTCGATCTTACAGCAAACCCGCACACGGCCCTGGCGTTCTTAACTGCGTTTGTATAGAA  
CCAGTAGC

CCACAAACAGCTAATCTAGCAGCTCTGGTACCGATCAATTCACAAAGTCTTCTAATCAACTTACGTTCTGG  
CAGAGTGGTCTTGACACCAAAGTCTTTTGGAAAGATGTCATCAGTATCTTCCAAGTTTTCAATGGATCAT  
CCTCGATT

AACGAATCTGCGCCATTACAACCGTTCCCTGAGAGGCCGATGGTGAGAGATACAGTGGTTCTTGAACCTAG  
TGGACATGTTGTCCTGAGATTTAGAGCTGACAACCCTGGTGTCTGGTATTTCCATTGTCATGTAGATTGGC  
ACTTACAA

TCAGATTCAGATTTGGATTTCAGAGGACAATAAACATGGCAAAGGCGACAATGACACTGCCCCCATATGGTT  
ACAAGATGATGTGCATTCAGACGAAGATATTCAGCTGGACTCAGAGGACGATTCCGATACAGAAGCTGTTT  
AAGCCAA

ATTAGTACTGGCGTTAGTACTGGCATTAGCACTACCATGAATGCACGTGTGCTGTCCTCATCACTGCTGC  
AATACTTTCTGCACCTGTCACTGCTATTGCTCTCTGGAAGCTAGACGGTAACGCAACGATCGACATGGAA  
GCTGTGCG

CATGAACCTTCACAACGCCTCAACCTCCTCCTTCAACAATGAAGCCTTCTGGAAGCCTTTGGACTCCGCAA  
TAGATCATCATTCTGGAGACACAAATCCAAACTCAAACATGAACACCACTCCAAATGGCAATCTGAGCCTG  
GATTGGTT

ATCCTGACCACGTGCGCGTCTGTAAATCCATGTGGCAAGTCCACCGTAATTGTCTTTGCCCTGTTGACCTG  
AACACCCTCACCATGGCACTTGGTACAATTGTCTGAGGCCGTTTCATGGTACCTTACCCTGTTGCAAGTAG  
GACAAGTC

GATCTTTCAAATGTGGGTGACGTGCTCACTTGGGGCGTGTTC AAGTGGGGATCTGTCATGAGGGTGAGTGT  
ATGCGTGTGTGTGTGTGTTGCGTAGATGTGTGATTTACTATGTGTTATGTAGCTGCTCTCATCGCTGCTGA  
TAGTAGAT

GCCGCTTCCAGATCGCTATCTCCATTACTAAACGTTCCAGCACCAGAGGATGGCACGGAGAGAATCTTACC  
TCAGAGTGTCTTGGTCCCAATAGTGGCTCTGTGCCAGGAGTACATAGTAACGTATCACCTGTTTTACTTT  
CAAGATCC

ATTGAGGGTACTGAGGCTGTTGAGGCTGATAGTAACGAGGTTGCTGTGCTTGGGCCCTGCTTGCCTTGC  
GGTGTGATTGAGAAGAATAAGGTGGAGGAGCCTGGTCTGCCTGTTGACGAGAATCTTCTCATTGTTAAC  
ACCTGGTG

ATTATGGAAGCTGTTTTCAATTCGGTGATGGCAAAGGTCCGTATTGGACACTTCGTGGAGGCACAGATCCT  
GGAAGAGCTGCAAGTAGACTACATTGACGAAAGTGAGGTTTTGACTCCAGCTGATTGGACACATCACATTG  
AGAAGCAT

AGTATAATGACCTCAGGTGAAGATTCTAAATTGTTCAATTTCTACACCCACCACCACCGAAGATGGCCAT  
CCCAGCAACAAAGCAAGGCGGATCGCTGGAAATCTCATTGATTTCGAAAACGATAGGGCTTTGCATTATC  
AAGATGAC

TGTTGAAGGAGAACCGGATATGGTAGGCTTATGTATTTTCAACTTGCCACCAGATGTAGTGTGTTGAAGCGT  
TACTCCCTGGAGTTGACACTGATCCGTCTGAGGATGACCCCATTAGTGACGCAGAAGAGGTTCTTCTGTGA  
ACCCAGG

CACTAAAGCAGTTCTTACGAACGGTTTCGCTGAGAAACATTATCTGTTGTGATTCTGATCTCTCACTAGCTT  
CTTGCTGTTGAGACTGTGGTGTGGTAGATGTCAATTGCTGTGATTGCGGGCTAGACTTTTTGTGCGGGGAA  
CTTGTTTG

AGAATCCACAAGGGAACCGAGAACTTGCATTAAATCGATCATTGGTTCAGCAACAACACCACCAAAGATAC  
CAGAGTGTAATCTGCACTTGGACCCTCAATGATGGTTTTGATAGTAGTTGCAACCTCTTAGACCATAAGTC  
AAAACAGG

AAGAAACCCAAGATTACGTATAGGCTACTTCACTCAACATCATGTGGATTCTATGGATTTGACCACGTCTG  
CAGTGGACTGGATGTCCAAATCCTTCCCAGGTAAAAGTGAAGAGTATAGACGTCATCTAGGTTTCATTT  
GGTATCAC

GCTCGTTTTGAGGCGTTTTTGGCGATCCAGCCGTTCTTGAAAGCTCTAGCCTGACCGACCTTACCAACTTGA  
GGACCCAGTTTTGGACATCACATCTTTGATTTGAAGTTGACCCAACCTCTTGGATGAGCTTGACTAGTTTAAAT  
TTCGTACG

CTAAGGTTAATTCTCAACAAGAGACAACACCTGGGACATCAGCTGTTCCAGAGAACCATCATCATGTCTCT  
CCTCAACCTGCTTCAGTACCACCTCCACAGAATGGACAGTACCAACAGCACGGCATGATGACCCCAAACAA  
AGCTATGG

GTATAGAAGCCGGTATGGACAATCTGAAGGCAGTGCAGGAAGATGAAGATGAAGGGGTGACAGTTTTCGAGG  
GCCCTGAGGGGAATTCTACAGGAAATGTCTCAGGAAGGGACGCATCACTTGACAATAGCGTCGAACATAGA  
AAGTTTTGG

TAGGCAATAGCATGGAACAGACACGAGTTGTCGTCGAGAACAGGATGTACTGATAGGACGTTTTTCTCCACT  
GCCACCAATTGACATCTCAGTGCTCTTCAGCACCTCTTTGGTTTTGGTTGTGGTGGTGGCAAACCTGAAGC  
TTTTCGTTA

TGACGTACAAAGTATAATGACCTCAGGTGAAGATTCTAAATTGTTTCATTTCTACACCCCCACCACCACCGA  
AGATGGCCATCCCAGCAACAAAGCAAGGCGGATCGCTGGAAATCTCATTTCGATTTCGAAAACGATAGGGCT  
TTGCATTA

TCAAACCGTACCTTTGAAATTATCCAACATGATAACGTCTGCACCAGCTTCAATGGCCTCTGTGGCTTCA  
TCTTCACTCAAACACTCCACTTCGATCTTCACAGCAAACCCGCACACGGCCCTGGCGTTCTTAACTGCGTT  
TGTTATAG

GGGTGATCAACTGGATTTCATGGCAACACCACGGGTCTTTGGCCAAGAGTTTTCTCTTCAATCTGTACTTTGTG  
GAAAGCACGACCAGCCTTCAACAATGGTTTTGTCAACTCTACCACCACCGCAATGACACCGATGACACCTC  
TGGCATCA

TTGGTATCGAATGTATGCAACAAGTGAATTTGGAAGAGTACTTGGCCAAGCAAGGCAGACCAGCTTCTGAT  
GCTAAAATGTTGAGAATTGACAAGTTGGCTTGCTTGGGTTGCTGTTGCTTCTGTACCGTTCTTTACATCTG  
CAACGATG

TTGGACCCGGGAGGTTGAATGTAGAAACACTAGGTGTTTTCTGTGCACAGGGCGGTTTCGTCGATGTTGAGG  
AAGTCTGTGATCTTTCAAATGTGGGTGACGTGCTCACTTGGGGCGTGTTCAGTGGGGATCTGTCATGAG  
GGTGAGTG

TTTGACGACGATGACGATGATGATGACGTGGAGACGCACTCCATTGTGCACTCAGACCTGCTCAACGACAT  
GGACAGCGCTTCCCAGCGTGCTTCACATAATGCTTCTGGTTTTCCCTAATTTTCTGGACACTTCTGCTCGT  
CCTCCTTC

TTTTACAAGTTTGAATAAAGGTGAAGTTTTCTAGATATTCCAGGTGCACAAGACGAAATGGTTTTTACCA  
CCAGCTCCTCCGAAGAACTCCGACCCTTCCATTTTTGAGAGCCTGGAAACTTCAAGTCAAAACAATTGCTAA  
TAAATTCT

TAAATCTCCGGACTCTTCTCCTGCAAAGCTATATAATGCCACGGCCTTTGGAGAAGACGTGGATGGGGATG  
TTGGAGCAGTGAATCTGCCCTGACTAGTTTGCGGTGTGAAGCGGACGAGATTCTAGATTTAGAAAATCTG  
TTCGACAA

TTGCTGTATCTTGACTCTCTCAGCACACTCCTCGTAGTGGTGCACAAGGGCCTTACCCTCCTCCGTGTTCT  
TGAAATGTTCTCTCAAATCTTCCAAGTATCAGTGACTTCTTCTCTTCTTCTCATCTTCGTGTCATCA  
TCATCATC

GATCAAAGAAATTATGGAAGCTGTTTCAATTCCGGTGATGGCAAAGGTCCGTATTGGACACTTCGTGGAGG  
CACAGATCCTGGAAGAGCTGCAAGTAGACTACATTGACGAAAGTGAGGTTTTGACTCCAGCTGATTGGACA  
CATCACAT

TTGCGGTGCCAAGGATCTAGGTGAGGCTTTGAGAAGAATAAACGAAGGTGCTGCAATGATCCGTACCAAAG  
GTGAAGCAGGTACCGGTGACGTTTTCCGAGGCCGTCAAGCACATCACCAAGATTAAGGCGGAGATCCAGCAG  
TATAAAGA

GACACAATGTCCCATCGTTCCGGGACAAACATACCTGTACAACCTTCACTGTCCAGAGCAGGTAGGAACGT  
TCTGGTACCATGCACACATGGGTGCCAGTACGGTGACGGTATGAGGGGTGCATTTATCATCCACGATCCG  
GAGGAGCC

AGGACCCCAAGGGTCTTCCCCTGTGCAATGCTTGCGGCCTCTTCTCAAGCTCCACGGCGTCACAAGGCCT  
CTGTGCTTGAAGACTGACATCATTAAGAAGAGACAGAGGTGCTCTACCAAGATAAACAACAATATAACGCC  
CCCTCCAT

ATGGATGGTCTTCTATGGTGACACAATGTCCCATCGTTCCGGGACAAACATACCTGTACAACCTTCACTGT  
CCCAGAGCAGGTAGGAACGTTCTGGTACCATGCACACATGGGTGCCAGTACGGTGACGGTATGAGGGGTG  
CATTTATC

TGGTAATCGCATTAGTACTGGCGTTAGTACTGGCATTAGCACTACCATGAATGCACGTGTCGCTGTCCTCA  
TCACTGCTGCAATACTTTCTGCACCTGTCACTGCTATTGCTCTCCTGGAAGCTAGACGGTAACGCAACGAT  
CGACATGG

AAGGCTTATGTACGTCATGTGCGCCGAAAGCTTTAAAGCTCAATTTACGTGAGAATGAACTGGAAGTCCTCA  
AGACAGCTGGTCATCTATTGACAAGAGAATTCCTGAGAGATGTTACAATGAATTTAGTCCAAGATAATGAA  
ACTAGGGG

ATGGCGCCTTTCCAATCTTCTTTGTCTACGTTTCGTTAAAGTCAAGATCCTTCTCATTCTCAGATTCTGAAG  
AAGAGGATCCGGAAGAAGAGGATCCATCATCATCTGAATGATGGTTGCACTCTTCTTCATCCTCATTGTTG  
GGATGAAA

GGGCACCTCTACCGGAGTCGTGGACAATTTGCTTAAACGATACCACGAATGTAACCGTGACGTTCAGCATAA  
TCCAAAGTTCTCAACTTGGCAGCACCTTGTCTCAATCTGGTGTGGGAGGTAAAGATAGAACCAGCACCTT  
TCTTTGGT

TACTTGAGCATGTAAATCAGAGATTCTATGTAACAGCTGCCAGAAACCAGAAAACGTCTCTTAACCACTT  
CCATTGTTGGCATGTTGAAACCTCCTGCCGCCTTGATCATCCTTCGACTTAGGGAAGAATCTTAACAAATG  
AAATTTAA

CAACAGCTATTTAGTGTATCCATCACCAACAAAAGTTATTAACCTCCGAAATTAAGCTCATGCCACCACAA  
ACAATATCACATTGTCAGTTGGTGGCAACACAGAGACCAGTTTTCAAGAGAGATCAGCAAGATGCTGGCCAT  
AGTGACAT

CGTATGTCAGATCCTCGCATGATCAAAGAAATTATGGAAGCTGTTTCAATTCCGGTGATGGCAAAGGTCCG  
TATTGGACACTTCGTGGAGGCACAGATCCTGGAAGAGCTGCAAGTAGACTACATTGACGAAAGTGAGGTTT  
TGACTCCA

TCTTGATAACTTGACTGAATCTTTCAAGTCCGCCTCTACAGCGATGTCAGGGTATGAGCCTTGCCAGGGA  
TCCTGACCACGTGCGCGTCTGTAATCCATGTGGCAAGTCCACCCTAATTGTCTTTGCCCTGTTGACCTGA  
ACACCTC

CCCATCGTTCCGGGACAAACATACCTGTACAACCTCACTGTCCCAGAGCAGGTAGGAACGTTCTGGTACCA  
TGCACACATGGGTGCCAGTACGGTGACGGTATGAGGGGTGCATTTATCATCCACGATCCGGAGGAGCCCT  
TCGAATAT

GGGATTAACCTCTGGAGGAAGTTAATGAAATGTACGAAGAAAGAATAAAGCCATGGAAGTCCGGAGGTTGGA  
TTCCCAGTTCTAGAAGAACCACAACCAACAAGCAGTACACCATTAGTTATTGTTGATAGTAAATAATTT  
CTAAATAT

CCTAATTCTACCTCAACCCTACCCTAATCCAACCCTTCCATCCTGTCTCTCAACTTACCCTCCATTACCCT  
GCCTCCCCACTCGTTACCCTGCCTCCCCACCACCAACCCACAAATCCACCATAACAGTTACCCTCCAATTA  
CCCATATC

CTTTGTTAGGTTTGTCCAATATGGCGTCATTGAACTTGACGGGGTTGTTGAGGACCTCCTTAGAGACCATC  
TCCCTGAGGTACGAACGCTATCTTGTTTGAAGATGCCATAGGCAATAGCATGGAACAGACACGAGTTGTC  
GTCGAGAA

TAGGCAAAAACCTGCAGCCACACCACCGGCGGAGGCTGATGCAGCTGCTTCTGCACTTCTACCAAGAGGCC  
AGCAGAAACGGAGACGTTACCACCCAACGTGATGGTCCCAAATTCAGAAAACGACTTAACAGCATCCTGAG  
TATTTAAA

TCCGGTGATGGCAAAGGTCCGTATTGGACACTTCGTGGAGGCACAGATCCTGGAAGAGCTGCAAGTAGACT  
ACATTGACGAAAGTGAGGTTTTGACTCCAGCTGATTGGACACATCACATTGAGAAGCATAAATTCAGGTG  
CCATTTGT

ACCAGCCTTCAACAATGGTTTGTCAACTCTACCACCACCGGCAATGACACCGATGACACCTCTGGCATCAG  
AAGAGATAACCTTCTTGGCACC GGATGGTAATCTGACTCTAGTCTTGTTCGTCTGGGTTGTGACCGATG  
ATAATAAC

GAGACAACACCTGGGACATCAGCTGTTCCAGAGAACCATCATCATGTCTCTCCTCAACCTGCTTCCAGTACC  
ACCTCCACAGAATGGACAGTACCAACAGCACGGCATGATGACCCCAAACAAAGCTATGGCCTCTAACTGGG  
CACATTAC

CGATGAGTTGCAAGGTTTAGTTAACAGTACTGTTACTCAGGCCATTATGTTTGGTGTCAGATGTGGTGCAG  
CTGCTTTGACTTTGATTGTATGTGGATGACATCGAGAAGCAGAAAACGCCGATTTTCATTATCAACCAA  
GTTTCATT

TATCTTGTGTTGAAGATGCCATAGGCAATAGCATGGAACAGACACGAGTTGTCGTCGAGAACAGGATGTACT  
GATAGGACGTTTTCTCCACTGCCACCAATTGACATCTCAGTGCTCTTCAGCACCCCTCTTTGGTTTTGGGTTG  
TGGTGGTG

ATAAGGTCTGCAATGTACGTCGGAGAAGAGCCACTATCATCGGCGACTCCTGTGATCGTGTTCCACTGTGG  
AGAGCCATATCGCACCTTGCCGTCCAGTTCCAGCTCCAAGATCATAACGGATTCTTCTCTGTGGCCAGCT  
GCAGATAT

CACACCCACACCCACACACCACACCACACCCTAATTCTACCTCAACCCTACCCTAATCCAACCCTTCCAT  
CCTGTCTCTCAACTTACCCTCCATTACCCTGCCTCCCCACTCGTTACCCTGCCTCCCCACCACCAACCCAC  
AAATCCAC

GAACCGGATATGGTAGGCTTATGTATTTTCAACTTGCCACCAGATGTAGTGTGTTGAAGCGTTACTCCCTGG  
AGTTGACACTGATCCGTCTGAGGATGACCCCATTAGTGACGCAGAAGAGGTTCTTCTGTGAACCCAGGTT  
GTTTCAGAA

CAACAGCAACAGCTTGCTGTGCGCACAGGCTCAGGCTCAGGCACAGGCACAGGCACAGGCTCAAGTTCCAGGC  
TCAGGCTCAGGCTCAGGCCAGGCTCAGGCTCAAGCACAGCAGATCCAGATGCAACAGCTTCAGATGCAGC  
AACAGCAA



CATCATGCCGTGCTGTTGGTACTGTCCATTCTGTGGAGGTGGTACTGAAGCAGGTTGAGGAGAGACATGAT  
GATGGTTCTCTGGAACAGCTGATGTCCCAGGTGTTGTCTCTTGTGTTGAGAATTAACCTTAGTGGAATCTCTA  
TCAAATTC

AACCTCAATCCGAAACAAATACAAAGACTACAACAACAGAGAGCTCTACAGGCTCAGCTTCTTTCTCAACA  
ACAGCAACAGCAGCAACAGCAGCAGCAACATCACTCACCCCAAGCGCAGGCCAGGCCAGTACCCAACAAC  
CTACTCAA

CCAGTTAGAGGCCATAGCTTTGTTTGGGGTCATCATGCCGTGCTGTTGGTACTGTCCATTCTGTGGAGGTG  
GACTGAAGCAGGTTGAGGAGAGACATGATGATGGTTCTCTGGAACAGCTGATGTCCCAGGTGTTGTCTCT  
TGTTGAGA

CGATCCTGCTACCGGAATGATATATGTAGATCAGCAGCAATACGCCATGGCTATGCAACAGCAGCAACAGC  
AACAGCAACAGCTTGCTGTGCGACAGGCTCAGGCTCAGGCACAGGCACAGGCACAGGCTCAAGTTCAGGCT  
CAGGCTCA

CGGAAAAGGCTGATATGGGGGATGGAGTTGCAGGAGCATCTGTCTGCATTGCATTCTGGGTCCCTAGTTGT  
GGCTGAAGTGGTTGAAGTTGAGGTTGCTGTTGAGGTTGCTGTTGAGGTTGCTGTTGAGGTTGCTGTTGAGG  
TTGCTGTT

TTAGAACCATCAACGACTAACAGTTCAGTACGTTTAGTCTGGTCACTTCAAGTGACAACAATTGGTGGAT  
TCCAACAGGTTAATCACGCAGGCACCAGAAGCTGCATCCACTGCATCTTCTACCCTGGAGGAACACAAA  
CTATGACT

TTAACAACGCCGAAAAGGCTGATATGGGGGATGGAGTTGCAGGAGCATCTGTCTGCATTGCATTCTGGGT  
CCCTAGTTGTGGCTGAAGTGGTTGAAGTTGAGGTTGCTGTTGAGGTTGCTGTTGAGGTTGCTGTTGAGGTT  
GCTGTTGA

CCAGGCAAGCACAGCAGCATCATCAAGATCATGCGCCAGGCAATGCAGAGGACAAGACAACCTGTAGGTGAG  
TCCGTGAATGGTGTTC AACAGCCGGCCTCCTCCCAGTCAGATGCCATGAAACAAGACAAGTACGTACAGCAC  
TAAACCAA

CTCTATTGAGGTCCTTGCTCAAGGAATGCGATGACATTGGTACAGCAAACATAGCTCAGGACCGTGGACGA  
CTTCTGGGGGTTGCCACCAGTGACAACCTTTCAACCACGGAAGTTCAAGGAAGAACGAATAACGATTTGCA  
ACAGGGGC

CACAAACCAAACCTCAATCCGAAACAAATACAAAGACTACAACAACAGAGAGCTCTACAGGCTCAGCTTC  
TTTCTCAACAACAGCAACAGCAGCAACAGCAGCAGCAACATCACTCACCCCAAGCGCAGGCCAGGCCAGT  
ACCCAACA

AGGAAGAAGCTTGGGAGGAAGAGGAAGATTGAGTAGATGTAGCAGCAGAGCTGGAGGCTGGAGATGCGGCA  
GCAGAACTTGTGAGTTGTTCTCAGAAGAGGAAGCAGCAGCGGTAGCTACAGAAGCAGCAGACGATGTTGT  
ACTGGTAG

TTGTTTCTAATAGATTGTTGATTTATTTTGATTAAGCTGTTGTTTGGTGGGGAAGAGACTCACTTTGCTGG  
TGTCCGACTTGTTCATGTTCTTCAACAGCACCTTCTTCTTCTTGTTCAGGTTCTTCAATTTGTCCATCTTC  
TTGTTCTG

TAGATTGTTGATTTATTTTGATTAAGCTGTTGTTTGGTGGGGAAGAGACTCACTTTGCTGGTGTCCGACTT  
GTTTCATGTTCTTCAACAGCACCTTCTTCTTCTTGTTCAGGTTCTTCAATTTGTCCATCTTCTTGTTCGTCT  
TCGGACCA

AGCTTGCTGTGCGACAGGCTCAGGCTCAGGCACAGGCACAGGCACAGGCTCAAGTTCAGGCTCAGGCTCAG  
GCTCAGGCCAGGCTCAGGCTCAAGCACAGCAGATCCAGATGCAACAGCTTCAGATGCAGCAACAGCAACA  
GGCGCCAT



CTTCAACAGCACCTTCTTCTTCTTGTTCAGGTTCTTCAATTTGTCCATCTTCTTGTTCGTCTTCGGACCAC  
CTGCCTTGACCGTCTTCCTCTTCTTCTTCTTTCGCCTTCTTTCAGGTTTGAAGTCTTCGTAATCCTGCTTGAA  
ACTTAAAG

GGGAAATACTCACGAATGAATTTAATACCTTGAATGACTGGCCCTGCAGGATCGTCAGCCGCTGTACCCAC  
TGGATCCTTGGTACCAGGGATGAGAGGCACACCAAACAAGATCACAGAACGCAAACCTTGGCCACTAATG  
GCTTTAAG

AATAAGCGTTCCAGGCAAGCACAGCAGCATCATCAAGATCATGCGCCAGGCAATGCAGAGGACAAGACAAC  
TGTAGGTGAGTCCGTGAATGGTGTTC AACAGCCGGCCTCCTCCAGTCAGATGCCATGAAACAAGACAAGT  
ACGTCAGC

ACAAAGACTACAACAACAGAGAGCTCTACAGGCTCAGCTTCTTTCTCAACAACAGCAACAGCAGCAACAGC  
AGCAGCAACATCACTCACCCCAAGCGCAGGCCAGGCCAGTACCCAACAACCTACTCAAGGTATGGTGCCC  
AATCATTT

CCTCAGCAGAGTTCTTCTCAATATGGACACCATCGCCGGAGATTGGATCTGCTGCTTTCTGTCAACAAAC  
CCAGTGCCTGCCCTGTTGAGCTCTCTTGCTGCAACTGCTGCTGACGATGTTGATTTACCATCGATTTCAA  
TGAGATGC

TTTTCAACTACGGTGACTTACCACCATGTTGACTGGTATTGCCCCAGACCAAGTGACCAGAATGATCACCC  
GGTGTTCATGGTACTCCAGCAGATTAAAGCCAGCCATCTCCAGTGCTCTATCCAAGGACGGTATCTACAC  
TATCGCAA

AACAGTATTACGATCCTGCTACCGGAATGATATATGTAGATCAGCAGCAATACGCCATGGCTATGCAACAG  
CAGCAACAGCAACAGCAACAGCTTGCTGTGCGCACAGGCTCAGGCTCAGGCACAGGCACAGGCACAGGCTCA  
AGTTCAGG

TGGTGGCTCTGTACCTCCATGGAATTGTCATCATTTTTTGGTGGATGGTCCTTTCTTCTGTGCTTGCAACTT  
GGGGTGACCAGCAAGCTGTGGCTGCCAAGGCTGCTTCATTGGCTGAAGGAGCAGCCGGTGTGTTGCCTCC  
TTTAACCC

TCAAAGACTTCAAAGAACCTTATCAATAGCATCCAAACCTTCTTCTTTCTGGAAGCAGCCAAACAAGCA  
GTCAACATCAAGTCGTCTGGAGAAACACCTTCAACAGTGTATGGTTCGTGCAAGGACAACCTGTTCTTGGT  
CAAAGTAC

ACAGCAGCATCATCAAGATCATGCGCCAGGCAATGCAGAGGACAAGACAACCTGTAGGTGAGTCCGTGAATG  
GTGTTCAACAGCCGGCCTCCTCCAGTCAGATGCCATGAAACAAGACAAGTACGTCAGCACTAAACCAAGA  
AATAGTAA

ACCTTCTTCTTCTTGTTCAGGTTCTTCAATTTGTCCATCTTCTTGTTCGTCTTCGGACCACCTGCCTTGAC  
CGTCTTCTTCTTCTTCTTCTTTCGCCTTCTTTCAGGTTTGAAGTCTTCGTAATCCTGCTTGAACTTAAAGTA  
GGCTTGAC

GGATATTGCTTCAAAGACTTCAAAGAACCTTATCAATAGCATCCAAACCTTCTTCTTTCTGGAAGCAGC  
CAAACAAGCAGTCAACATCAAGTCGTCTGGAGAAACACCTTCAACAGTGTATGGTTCGTGCAAGGACAACCT  
TGTTCTTG

TAGTTTGCATAGTGTAGATACCGTCCTTGGATAGAGCACTGGAGATGGCTGGCTTTAATCTGCTGGAGTA  
CCATGGAACACCGGTGATCATTCTGGTCACTTGGTCTGGGGCAATACCAGTCAACATGGTGGTGAAGTAC  
CGTAGTTG

AGGGAAGACCATCGACCACATGTGGCCATTGTAAAGAGCTGAGAAGAACCAAGAACTTCAACCCATCCGGT  
GGGTGCATGTGTGCCTCTGCACGACGGCCAGCTGTTGGCAGCAAGGAAGATGAAACACGATGTCGTTGTGA  
TGAGGGTG

TGATGCCTTAAATGACTTGAACAATTGAAGGTCGGTGTAGATGCTGTGAAGAAGGCAGGTGGTGTGTAG  
AAGCCACTGTTTGTTCCTCTGGGGATATGCTTCAGCCAGGCAAGAAATACAATTTGGATTACTACTTGGAA  
ATTGCTGA

TGTGGCCATTGTAAAGAGCTGAGAAGAACCAAGAACTTCAACCCATCCGGTGGGTGCATGTGTGCCTCTGC  
ACGACGGCCAGCTGTTGGCAGCAAGGAAGATGAAACACGATGTCGTTGTGATGAGGGTGAACCTTGTAAAT  
GTCATAAC

CAAGAAAGCCTTATCAATAGCATCCAAACCCTTCTTCTTTCTGGAAGCAGCCAAACAAGCAGTCAACATCA  
AGTCGTCTGGAGAAACACCTTCAACAGTGTATGGTTTCGTGCAAGGACAACCTTGTTCCTGGTCAAAGTACCG  
GTTTTGTC

GGAGACGACGACGTGAAAGTCTGCGAGGATCACGTGCTACAGCTGGTCTCATGGCTCTTGTAACTGAAGT  
TTGTCTCTCTGTCATGGTTTGGCAACAGCCTTCTTGTGTTTTGATTCTTTATTCATGTTTACGGCTCTGG  
AGGTAGCG

TGGACCGGATGTACGAGGCTTCTTTGCCCAATTTATTGACATCACCTGGAATGCAGGCGGTGGACGGTTG  
TCACATCTGTCCACGGACTTGGTTGCGACAGCGAGTCTGTGCTTGGTTTGGAAACGTGCATGCACCTTAC  
CTGCACCA

TTATCAATAGCATCCAAACCCTTCTTCTTTCTGGAAGCAGCCAAACAAGCAGTCAACATCAAGTCGTCTGG  
AGAAACACCTTCAACAGTGTATGGTTTCGTGCAAGGACAACCTTGTTCCTGGTCAAAGTACCGTTTTGTGCG  
AACACAAG

TACATTTCAACACCTGTTCTTGAATTTGCTGCGGATAATTAGACAGCTGCTGTTGTTGAGCAATTGCTTGC  
GTTTGTGCAACGGTACTTGAATTTGCTGCTGCTGCTGCTGCTGTAATTTAGATCCAGTTGAAGGCTTAGA  
CCAAGCAA

ATTTACAAGCACCGCTGGACTCGTATGGGGTATAAGTGATACCTCTGACACCAGAGGCAAAGCTGCTGACG  
TCTTCCGCGGAAGAAGTCTGAGGGAAGAAGCTTGGGAGGAAGAGGAAGATTGAGTAGATGTAGCAGCAGAGCT  
GGAGGCTG

ATCGACCACATGTGGCCATTGTAAAGAGCTGAGAAGAACCAAGAACTTCAACCCATCCGGTGGGTGCATGT  
GTGCCCTCTGCACGACGGCCAGCTGTTGGCAGCAAGGAAGATGAAACACGATGTCGTTGTGATGAGGGTGAA  
CCTTGTA

ATTGATGAATCTGCAACAACCTCCGGCTATCCCTACTAAATCTGATGAAGCTGAAGCTGAAGTTGAGGCTGA  
AGCAGGTGATGCTGGAACAAAGATTGGACTTGAAGCTGAAATCGAACTACAACCTGATGAACTGATGATG  
GTACAAAC

GTGTCCGACTTGTTTCATGTTCTTCAACAGCACCTTCTTCTTCTTGTTCAGGTTCTTCAATTTGTCCATCTT  
CTTGTTCGTCTTCCGACCACCTGCCTTGGACCGTCTTCTTCTTCTTCTTCTTCCGCTTCTTCCAGTTTGAAG  
TCTTCGTA

GGAAGAGACTCACTTTGCTGGTGTCCGACTTGTTCATGTTCTTCAACAGCACCTTCTTCTTCTTGTTCAGG  
TTCTTCAATTTGTCCATCTTCTTGTTCGTCTTCCGACCACCTGCCTTGGACCGTCTTCTTCTTCTTCTTCT  
CGCCTTCT

TCTTGTCTCTTGGCGCTTGTCTTTCTTTCAATGTAACGCTTGTGGTCTCTGTTAGAAGAGTCATCTGGG  
ACATCTTCGTCCAAGAAGTCAAAGGTTCTCCAGGAGTCAAATCTGTGCCAGAAAGCATAGAATTGTTCAAC  
TTCCTTCT

GTGCTGGTAGTAGAAGTACTGGTGGTAGTGGTTGTCGTAGTTGCAGTGTGACGAGTTGCTTTCAGTGGCCTC  
AGATGTGGTAGTAGAAGTAAACGTCCCCTTTCATCTGATGAAGACGATGACGATGACGATGACGATGACGATG  
ACGATGAT

TTAATCACCTCACAAACAAAACCTCAATCCGAAACAAATACAAAGACTACAACAACAGAGAGCTCTACAG  
GCTCAGCTTCTTTCTCAACAACAGCAACAGCAGCAACAGCAGCAACATCACTCACCCCAAGCGCAGGC  
CCAGGCCA

GGAATTCATCAATATTTTACTGACGATGGTTTATTAACGAGGAGTGTGGTCCAGAGTGGCAAGGCATGA  
AGAGGTTTGATGCCAGAAAGAAGGTCATTGAGCAGCTGAAGGAAAAGAACCTATACGTTGGCCAAGAAGAT  
AATGAAAT

GTTGATATATTTAGAGTCTTTGATGCCTTAAATGACTTGGAACAATTGAAGGTCGGTGTAGATGCTGTGAA  
GAAGGCAGGTGGTGTGTAGAAGCCACTGTTTGTCTCTGGGGATATGCTTCAGCCAGGCAAGAAATACA  
ATTTGGAT

ACCGGACCCACACTATCCGTTGCCACAGTATATCCCACCACTGAGTACTTCTCACCTGATCCAATCGATT  
CACAGAATCAACACTCTGAAGTACCTCAAGCTGAGACAAAGGTGAGAAATAACGTCTTACCACCACACT  
TTAACATC

ATTAAGCTGTTGTTTGGTGGGGAAGAGACTCACTTTGCTGGTGTCCGACTTGTTTCATGTTCTTCAACAGCA  
CCTTCTTCTTCTTGTTCAGGTTCTTCAATTTGTCCATCTTCTTGTTCGTCTTCGGACCACCTGCCTTGACC  
GTCTTCCT

GAAGAAGTAGAGGAAGAAGCTTGGGAGGAAGAGGAAGATTGAGTAGATGTAGCAGCAGAGCTGGAGGCTGG  
AGATGCGGCAGCAGAAACTTGTGAGTTGTTCTCAGAAGAGGAAGCAGCAGCGGTAGCTACAGAAGCAGCAG  
ACGATGTT

GGGAAGTGGATACTGACACGGACGATAACAACGAAGGAGATGGCTCTGACAATCACGAGGAAGGTGGAGAA  
GAAGGAAGTAGAGGAGCTGATGCTGATGTGTCCAGTGCACAGCAGCGTGCCGAAAGGGTTGCGGACCCATG  
GATATATC

GAACCTTGGAGACAATTGGATAACCAGCGGAAGCATCGAAGATGGAAGAGTGAGAGTCACCCAAGAAGTCAG  
AGGAGACAACAGCGTCTTCGGTGTAAACCCAAAACACCCTTCAACTTACCTTCAGCGGCAGCCTTAAACAACC  
TTCTTGAT

CATCAAGATCATGCGCCAGGCAATGCAGAGGACAAGACAACCTGTAGGTGAGTCCGTGAATGGTGTTCACA  
GCCGGCTCCTCCAGTCAGATGCCATGAAACAAGACAAGTACGTGAGCACTAAACCAAGAAATAGTAAGA  
ACGATGGT

CATCCAAACCCTTCTTCTTCTGGAAGCAGCCAAACAAGCAGTCAACATCAAGTCGTCTGGAGAAACACCT  
TCAACAGTGTATGGTTCGTGCAAGGACAACCTGTTCTTGGTCAAAGTACCGTTTTGTGCGAACACAAGAT  
TTCGACAC

AACCTCTGATGAAAATCAATTTGTTCTGTTCCACCAAATTTGACAGAGGAGTGTGTTGCCACTCCTGCCTA  
TGAACAGATAACAGATTCTGTGAATTCAGGTGGACAAGGAGTTGCCATTATTGTTTTGAGTATTCCGTGTT  
ATCCAGCG

CACTTTGCTGGTGTCCGACTTGTTTCATGTTCTTCAACAGCACCTTCTTCTTCTTGTTCAGGTTCTTCAATT  
TGTCCATCTTCTTGTTCGTCTTCGGACCACCTGCCTTGACCGTCTTCTCTTCTTCTTCTTGCCTTCTTC  
AGGTTCGA

GTGGCTGCTGCGAACATTCTCCTCAGCAGAGTTCTTCTCAATATGGACACCATCGCCGGAGATTGGATCT  
GCTGCTTTCTGTCAACAAACCCAGTGCCTGCCCTGTTGAGCTCTCTTGCTGCAACTGCTGCTGACGATGT  
TGATTTAC

CCTTACCAGGCTTGCTACTGTGGCTGCTGCGAACATTCTCCTCAGCAGAGTTCTTCTCAATATGGACAC  
CATCGCCGGAGATTGGATCTGCTGCTTTCTGTCAACAAACCCAGTGCCTGCCCTGTTGAGCTCTCTTGCT  
GCAACTGC

CGCACAGGCTCAGGCTCAGGCACAGGCACAGGCACAGGCTCAAGTTCAGGCTCAGGCTCAGGCTCAGGCC  
AGGCTCAGGCTCAAGCACAGCAGATCCAGATGCAACAGCTTCAGATGCAGCAACAGCAACAGGCGCCATTA  
TCTTTTCA

GTTCTTCTCAATATGGACACCATCGCCGGAGATTGGATCTGCTGCTTTCTGTCAACAAACCCAGTGCCTG  
CCCCTGTTGAGCTCTCTTGCTGCAACTGCTGCTGACGATGTTGATTTACCATCGATTTCAATGAGATGCTG  
CTCAAAAT

AGCTGCTGACGTCTTCGCCGGAAGAACTAGAGGAAGAAGCTTGGGAGGAAGAGGAAGATTGAGTAGATGTA  
GCAGCAGAGCTGGAGGCTGGAGATGCGGCAGCAGAACTTGTGAGTTGTTCTCAGAAGAGGAAGCAGCAGC  
GGTAGCTA

CGCTGACAGAGAATCCACTCAAACCACACTTAGTCTTGGAACCTCTGCCTGTAGCACCCCTCGTCTCTGATT  
TCACCACCAGAACCTGTAGCAGCACCTGGGAAAGGAGACACGGCTGTTGGATGGTTGTGAGTTTCGACTTT  
GATAAGTA

ATTTATTTTGATTAAGCTGTTGTTTGGTGGGGAAGAGACTCACTTTGCTGGTGTCCGACTTGTTTCATGTTT  
TTCAACAGCACCTTCTTCTTCTTGTTCAGGTTCTTCAATTTGTCCATCTTCTTGTTCGTCTTCGGACCACC  
TGCCTTGA

GCCACTTCGACAATTTTCATCTTCTTCTGTCGTATCTTCTTCTTCTTCACTCTCCTCCTCTTCTTCTTCTT  
CGCATTCTTTGATGGCATCTCTTCCACTGCTCCCGCACCTGGCTCGCCTCTCATTAAACATATTAACAATTC  
TGTAACAT

CAAGTTATAAAGCCTTCTTGGCGGCATCAGCAGGGGAAACCTTGTTTTCTCTGTTGAATCTTGGTCTTTGA  
GGTGGAGCTCTGTTCTTTCTGTCTTCTCTGGATCTGACTCTGACAATTCTGGCGTGAATAGCACAAGAAAC  
ACAGTAGT

TACCAGGAGACCAACTTGACGAACTTTGGAGACAATTGGATACCAGCGGAAGCATCGAAGATGGAAGAGTG  
AGAGTCACCCAAGAAGTCAGAGGAGACAACAGCGTCTTCGGTGTAACCCAAAACACCCTTCAACTTACCTT  
CAGCGGCA

ATACAGTTTCAGGGAAATACTCACGAATGAATTTAATACCTTGAATGACTGGCCCTGCAGGATCGTCAGCCG  
CTGTACCCACTGGATCCTTGGTACCAGGGATGAGAGGCACACCAAACAAGATCACAGAACGCAAACCTTG  
GCCACTAA

TGCGGCCTTGTTCTTTCTTTCAATGTAACGCTTGTGGTCTCTGTTAGAAGAGTCATCTGGGACATCTTCGT  
CCAAGAACTCAAAGGTTCTCCAGGAGTCAAATCTGTGCCAGAAAGCATAGAATTGTTCAACTTCCTTCTTG  
GAAGAATC

GCTCGGACGAAATATTCGGTGGCTATCTATATTTTCGCACAAGCACCTTCTGCTGCAGAATTTACACCCGAA  
TCTGTGCAACGTGTCAAGAACTTGCATTTGGCAGATTGTTTGGAGAGCTAATAAGTCCACGATGGCTTGGGG  
TCTAGAAG

CTGGATCCTACGAGCATAACCATTCACTCCAATCATCTCTGTCCGGATCTGCCTCAATGCCGATGACCAAAC  
CTGGCTGGTGTGATATCTCATCACTTGAGAGAAGTGAGGGCTTTGAGTTCTTATAAGGAATAGGTTTTATT  
AAATCTAT

AGGCGCCTTTACCATATCCTCCACCTTTCACTAATTACTATCAACAGCCTCAGCAACAGTACGCACCACCT  
TCACAGCAAGCACCGGTGGAAGCACAACCGCAACAGAGCAGTGGGGCTAGTAGTGCCTTCAAGAGTTTTGG  
TAGCAAAT

CCGTGGACGAATTCCTCAACGGTAGATTCCGGTGAATTCGTCTTCTCCTGCGTTCCGGTGACTTGGATCTGTGT  
GGTTCAGACTTGATCAGGCAATCAGCGAACAAATGTCTCGAATTATGGTCCACCCTACTTCCATCAACGA  
CGTCGCCT

TAGAAGTAGTTTAGGGTCATTTTTTCAGTACATTGGTTGGCCTGGCTTGAGTTGCAACCAGTGCCAAGCATC  
AGCGTTGGCCTCTCTCTTGTACATTGGTTGGCCTGGTCTCAAATTTAACCAGTGCCAAGCGTCGGCAACAG  
CCTCTCTT

GTCTTCGCCGGAAGAACTAGAGGAAGAAGCTTGGGAGGAAGAGGAAGATTGAGTAGATGTAGCAGCAGAGC  
TGGAGGCTGGAGATGCGGCAGCAGAACTTGTGAGTTGTTCTCAGAAGAGGAAGCAGCAGCGGTAGCTACA  
GAAGCAGC

GTGAATTTCTGCACTGAGAAACGTACCTGTAGTGATTATGACCTGATCTGCCCCAACCTGGGTACCGTCAT  
CCAGAACCACACCTTTGATGACCTTGTGGCCACATCCGGGGTCATACAAGATCAAGTCAGCAACTTTGTTT  
TGCAGCAG

AAACCACACTTAGTCTTGGAACCTCTGCCTGTAGCACCTCGTCTCTGATTTACCACCAGAACCTGTAGC  
AGCACCTGGGAAAGGAGACACGGCTGTTGGATGGTTGTGAGTTTCGACTTTGATAAGTAATGGAATTCCTT  
CCTTTGTA

TCAGTACCTTCTACAAGTTCCAGATCGTCCGTTTTCTCAAAGTCTCAGACACTCCGGTGCCTTCTACAAGTTC  
AAGGTCGTCCGTTTTCTCAAACATCTAGCTCACTACAGCCCACCACTACATCCTCCCAACGTTTTACCATT  
CCTCAT

TTTAATACCTTGAATGACTGGCCCTGCAGGATCGTCAGCCGCTGTACCCACTGGATCCTTGGTACCAGGGA  
TGAGAGGCACACCAAACAAGATCACAGAACGCAAACCCTTGGCCACTAATGGCTTTAAGTAGTCTTTTAGC  
CTATTTAC

CGAGAGGGTTTTAGAAGTAGTTTAGGGTCATTTTTTCAGTACATTGGTTGGCCTGGCTTGAGTTGCAACCAGT  
GCCAAGCATCAGCGTTGGCCTCTCTCTTGTACATTGGTTGGCCTGGTCTCAAATTTAACCAGTGCCAAGCG  
TCGGCAAC

CGAACATTCTCCTCAGCAGAGTTCTTCCCTCAATATGGACACCATCGCCGGAGATTGGATCTGCTGCTTTCT  
GTCAACAAACCCAGTGCCTGCCCTGTTGAGCTCTCTTGGCTGCAACTGCTGCTGACGATGTTGATTTACCA  
TCGATTTT

TTCAAATACGCCAGACAATTGATTTCTAACGAAGGTGTCTTGGTGGGTGGTTCTTCCGGTTCTGCCTTAC  
TGCGGTTGTGAAATACTGTGAAGACCACCCTGAACTGACTGAAGATGATGTCATTGTTGCCATATTTCCAG  
ATTCCATC

TTAATTCTCAACAAGAGACAACACCTGGGACATCAGCTGTTCCAGAGAACCATCATCATGTCTCTCTCTCAA  
CCTGCTTCAGTACCACCTCCACAGAATGGACAGTACCAACAGCACGGCATGATGACCCCAAACAAGCTAT  
GGCCTCTA

GGATAATGGTGTGATATATTTAGAGTCTTTGATGCCTTAAATGACTTGGAACAATTGAAGGTCGGTGTAG  
ATGCTGTGAAGAAGGCAGGTGGTGTGTAGAAGCCACTGTTTGTCTCTGGGGATATGCTTCAGCCAGGC  
AAGAAATA

TTGGGAGGAAGAGGAAGATTGAGTAGATGTAGCAGCAGAGCTGGAGGCTGGAGATGCGGCAGCAGAACTT  
GTGAGTTGTTCTCAGAAGAGGAAGCAGCAGCGGTAGCTACAGAAGCAGCAGACGATGTTGTACTGGTAGCG  
GCAGCTGG

TGACGAAGAAGGAGACGACGACGTGAAAGTCTGCGAGGATCACGTGCTACAGCTGGTCTCATGGCTCTTG  
TAACTGAAGTTTGTCTCTCTGTCATGGTTTGGCAACAGCCTTCTTGTGTTTTGATTCTTTATTCATGTTT  
ACGGCTCT

CAATTTTCATCTTCTTCGTCGTATCTTCTTCTTCTTCACTCTCCTCCTCTTCTTCTTCTTCCGCATTCTTT  
GATGGCATCTTCTTCACTGCTCCCGCACCTGGCTCGCCTCTCATTAAACATATTAACAATTCTGTAACATAA  
TTCACCAA

TTATTGCCAAGTTGTCCGTTATCCCAATCAGAAGAGGTTACTGGGGTACCAACTTGGGTCAACCACATTCT  
TTGGCCACCAAGACCACTGGTAAGTGTGGTTCGGTCACTGTTAGATTGATCCCAGCCCCAAGAGGTTCTGG  
TATCGTCG

TGCTGTTGGTACTGTCCATTCTGTGGAGGTGGTACTGAAGCAGGTTGAGGAGAGACATGATGATGGTTCTC  
TGGAACAGCTGATGTCCCAGGTGTTGTCTCTTGTGTTGAGAATTAACCTTAGTGGAATCTCTATCAAATTCCG  
GTAAATTG

CCACTGAAAGTACCAACTCCAGCACTAATGCTACTACCCTGCCAGCACCAACGTCAGGACTAGTGCTACT  
ACCACTGCCAGCATCAACGTCAGGACTAGTGCGACTACCCTGAAAGTACCAACTCCAACACTAGTGCTAC  
TACCACCG

TTGGTTACGATCCAACTGCTCCTGTGCGAAGAAGGCCGAAGAAGAAGAAAGTGAAAGTGAAAGTGAAAGTGAA  
GATCAAGTTGAGGAGGAAGATCAAGAAGTTGTTGCTGGAGAAGAAGATGATGACGATGACGAAGAGCTACA  
AGCTCAA

CCCAATTGTCTCCATCGAAGATCCATTTGCTGAAGATGACTGGGAAGCTTGGTCTCACTTCTTCAAGACCG  
CTGGTATTCAAATTGTTGCTGATGACTTGACTGTCACCAACCCAAAGAGAATTGCTACCCTATCGAAAAA  
AAGGCTGC

GAGAATAGAGCCTCACAGGATATGTATCTCTATGAAGCGATGCCACCAACGCTGCCCCACAGGGATTGGAA  
GGACTATTTTGTGATGGCTACTGCCACAGCTGGGCTGTTGTATGGTGCATATGAAGTAACTAGAAGGTATG  
TGATACCA

GATGGTTGTTGGTAATGTGCCAGTTAGAGGCCATAGCTTTGTTTGGGGTCATCATGCCGTGCTGTTGGTA  
CTGTCCATTCTGTGGAGGTGGTACTGAAGCAGGTTGAGGAGAGACATGATGATGGTTCTCTGGAACAGCTG  
ATGTCCCA

CGTTCGAAGAATTTGTGCGAAGATAAACGATTCAATTGCTCTAGAGGTATCTGATAATGATGACGATTGTGAC  
ACTGATTTGACTGCTGACACAGCTGACGAGCTGGAAAGCTCTGCTATCTTAAAGATGAGGGAGTCTGATGC  
ATCTTTAA

GACCTAAATTCATTCCAAACAAACCATACAGACAATTCAACACATGGTGTGGTGAACCTGCAAGAATGAT  
CATTGCAGGTGCCATTGGACAGGAAATCTCCGACAAGAAGTTGACTGAACAATGTTCAAGAGTAGGTGATT  
ATTTGTTT

CAACGACTAACAGTTCAGTACGTTTAGTCTGGTCACTTCAAGTGACAACAATTGGTGGATTCCAACTGAG  
TTAATCACGCAGGCACCAGAAGCTGCATCCACTGCATCTTCTACCGTTGGAGGAACACAACTATGACTTT  
GCCCCATG

GTACTCTCACTTCAATCTCCCCGTCGCACAAGATCACAAGAGGATCTTTGATGGCGACAAGGGCTTGAACA  
CCGGTGGGATGGGTGCCTATGCCCCGCTCCTGTGGCCACACCATCTTTGTTGAAGACCATAGATTACAG  
ATTGTGAA

CAGGCTCAGGCACAGGCACAGGCACAGGCTCAAGTTCAGGCTCAGGCTCAGGCTCAGGCCAGGCTCAGGC  
TCAAGCACAGCAGATCCAGATGCAACAGCTTCAGATGCAGCAACAGCAACAGGCGCCATTATCTTTTCAGC  
AAATGTCG

ATCAGACGCAAGGGAAGACCATCGACCACATGTGGCCATTGTAAAGAGCTGAGAAGAACCAAGAACTTCAA  
CCCATCCGGTGGGTGCATGTGTGCCTCTGCACGACGGCCAGCTGTTGGCAGCAAGGAAGATGAAACACGAT  
GTCGTTGT

CCTTTGATCTCCATATTGGTTATTTGTTGCGTTAAAGTGTGCTGTTGCTGTTGCTGCTCATCCATGAACC  
ACTGTTGCTGCTGCTGCTGTCTTGAACATATGATCAACTTCGGACGCATTTAAATCTATTGAATCTTCATT  
GTCATTAC

TTCGTTGTCGTACCAGGAGACCAACTTGACGAACTTTGGAGACAATTGGATAACCAGCGGAAGCATCGAAGA  
TGGAAGAGTGAGAGTCACCCAAGAAGTCAGAGGAGACAACAGCGTCTTCGGTGTAACCCAAAACACCCTTC  
AACTTACC

TCATTGCTCTAGAGGTATCTGATAATGATGACGATTGTGACACTGATTTGACTGCTGACACAGCTGACGAG  
CTGGAAAGCTCTGCTATCTTAAAGATGAGGGAGTCTGATGCATCTTTAAATGTTACCACCGCAATAATAC  
ATCAAGGA

GATAAACGATTCAATTGCTCTAGAGGTATCTGATAATGATGACGATTGTGACACTGATTTGACTGCTGACAC  
AGCTGACGAGCTGGAAAGCTCTGCTATCTTAAAGATGAGGGAGTCTGATGCATCTTTAAATGTTACCACCG  
GCAATAAT

ACTCTGGTAGAGTAACCGTATTTCGTTGTCGTACCAGGAGACCAACTTGACGAACTTTGGAGACAATTGGAT  
ACCAGCGGAAGCATCGAAGATGGAAGAGTGAGAGTCACCCAAGAAGTCAGAGGAGACAACAGCGTCTTCGG  
TGTAACCC

TTAGAGTCTTTGATGCCTTAAATGACTTGGAAACAATTGAAGGTCGGTGATAGTGTGTAAGAAGGCAGGT  
GGTGTGTAGAAGCCACTGTTTGTCTCTGGGGATATGCTTCAGCCAGGCAAGAAATACAATTTGGATTA  
CTACTTGG

CTAGCGCTGTTGCTAATCATGCGCACGACGATGAGGCTTCCACAGACGTTGAAGGCTCCACAGACGTCAAT  
GTCAATGAACAGGCTCTGTTGCAAGAGGATTTTGACATGTGGAGTGAGACTATATTGCAGAAAACACAAGA  
CGTCATAC

ATCATTTTTTGTTGATGGTCCTTTCTTCTGTCGTTGCAACTTGGGGTGACCAGCAAGCTGTGGCTGCCAAGG  
CTGCTTCATTGGCTGAAGGAGCAGCCGGTCTGTTGCCTCCTTTAACCAGGTTATTTCTGGATGTTCCAC  
AACTGTAT

CCAGAGGCAAAGCTGCTGACGTCTTCGCCGGAAGAAGCTAGAGGAAGAAGCTTGGGAGGAAGAGGAAGATTG  
AGTAGATGTAGCAGCAGAGCTGGAGGCTGGAGATGCGGCAGCAGAACTTGTGAGTTGTTCTCAGAAGAGG  
AAGCAGCA

TGGAATTGTCATCATTTTTGTTGATGGTCCTTTCTTCTGTCGTTGCAACTTGGGGTGACCAGCAAGCTGTG  
GCTGCCAAGGCTGCTTCATTGGCTGAAGGAGCAGCCGGTCTGTTGCCTCCTTTAACCAGGTTATTTCTG  
GATGTTCA

AGTAGTAGAAGTGCTGGTAGTAGAAGTACTGGTGGTAGTGGTTGTCGTAGTTGCAGTGTGAGCAGTTGCTT  
CAGTGGCCTCAGATGTGGTAGTAGAAGTAACGTCCCCTTCATCTGATGAAGACGATGACGATGACGATGAC  
GATGACGA

GAATCCACTCAAACCACACTTAGTCTTGGAACTCTGCCTGTAGCACCTCGTCTCTGATTTACCACCAG  
AACCTGTAGCAGCACCTGGGAAAGGAGACACGGCTGTTGGATGGTTGTGAGTTTCGACTTTGATAAGTAAT  
GGAATTCT

CAGTTCAGTACGTTTAGTCTGGTCACTTCAAGTGACAACAATTGGTGGATTCCAAGTGAAGTAAATCACGC  
AGGCACCAGAAGCTGCATCCACTGCATCTTCTACCCTTGGAGGAACACAACTATGACTTTGCCCCATGCA  
ATTGCAGC

GCTTGCTACTGTGGCTGCTGCGAACATTCTCCTCAGCAGAGTTCTTCTCAATATGGACACCATCGCCGGA  
GATTGGATCTGCTGCTTTCTGTCAACAAACCCAGTGCCTGCCCTGTTGAGCTCTCTTGCTGCAACTGCTG  
CTGACGAT

TACTTTGGACCAGGAAGAGGCTAGCGCTGTTGCTAATCATGCGCACGACGATGAGGCTTCCACAGACGTTG  
AAGGCTCCACAGACGTCAATGTCAATGAACAGGCTCTGTTGCAAGAGGATTTTGACATGTGGAGTGAGACT  
ATATTGCA

GTAAAGAGCTGAGAAGAACCAAGAACTTCAACCCATCCGGTGGGTGCATGTGTGCCTCTGCACGACGGCCA  
GCTGTTGGCAGCAAGGAAGATGAAACACGATGTCGTTGTGATGAGGGTGAACCTTGTAATGTCATACCAA  
GAGGAAAA

CACGAATGAATTTAATACCTTGAATGACTGGCCCTGCAGGATCGTCAGCCGCTGTACCCACTGGATCCTTG  
GTACCAGGGATGAGAGGCACACCAAACAAGATCACAGAACGCAAACCTTGGCCACTAATGGCTTTAAGTA  
GTCTTTTA

TTTCTCAAGTTTCAGACACGTGACGTACCTTCTACAAGTTCCAGATCGTCCGTTTCTCAAGTCTCAGACACT  
CCGGTGCCTTCTACAAGTTCAAGGTCGTCCGTTTCTCAAACATCTAGCTCACTACAGCCCACACTACATC  
CTCCCAAC

TCTGGTGAAGGCTCGGACGAAATATTCGGTGGCTATCTATATTTTCGCACAAGCACCTTCTGCTGCAGAATT  
TCACACCGAATCTGTGCAACGTGTCAAGAACTTGCATTTGGCAGATTGTTTGAGAGCTAATAAGTCCACGA  
TGGCTTGG

TCTTCTTCTTCTTCTTTCGTCGGAAGAAGAGTCAGAGGAAGAGGAAGAGGAATCCTTGGATTCTTCTTCTT  
GGTTTCAGCTTCACTTTCGCTGTGCAAGACGATGAAGAAGAGGATTCAGAATCAGAGGATGAAGATGAAG  
ATGAAGAT

CGGTAGACGTATCTCATCTTGTACTTGTAAACCTTGGTGACACCAGTGATCATGTTGTCAACCAAAGACTT  
GACGGTTCTCAAAGCAGCAACGTGCTTCTGCCACCGTTGTGAACAGCAACCTTGATCAATTGGTTGTTGA  
CCTTGGTG

TGTTTTGTTGGGGAAGAGACTCACTTTGCTGGTGTCCGACTTGTTTCATGTTCTTCAACAGCACCTTCTTCTT  
CTTGTTTCAGTTCTTCAATTTGTCCATCTTCTTGTTCGTCTTCGGACCACCTGCCTTGACCGTCTTCTCTT  
TCCTCTTC

TGATAGAGATTCCACTAAGGTTAATTCTCAACAAGAGACAACACCTGGGACATCAGCTGTTCCAGAGAACC  
ATCATCATGTCTCTCCTCAACCTGCTTCAGTACCACCTCCACAGAATGGACAGTACCAACAGCACGGCATG  
ATGACCCC

TGAATGACTGGCCCTGCAGGATCGTCAGCCGCTGTACCCACTGGATCCTTGGTACCAGGGATGAGAGGCAC  
ACCAAACAAGATCACAGAACGCAAACCTTGGCCACTAATGGCTTTAAGTAGTCTTTTAGCCTATTTACAC  
CGATTCTA

TGTTTCATGTTCTTCAACAGCACCTTCTTCTTCTTGTTCAGGTTCTTCAATTTGTCCATCTTCTTGTTCGTC  
TTCGGACCACCTGCCTTGACCGTCTTCTCTTCTTCTTCTTTCGCTTCTTTCAGGTTTCAAGTCTTTCGTAAT  
CCTGCTTG

TTCAATCTCCCCGTCGCACAAGATCACAAAGAGGATCTTTGATGGCGACAAGGGCTTGAACACCGGTGGGAT  
GGGTGCCTATGCCCCGCTCCTGTGGCCACACCATCTTTGTTGAAGACCATAGATTACAGATTGTGAAGC  
CTACGATT

GTATCAATTTTCGTTAGAACCTTGTGTCTAAGAGAAAAGTTACAATGGATGGTTGACAAGGACTTGGTCGGA  
AATTGGGACGATCCAAGGTTCCCAACTGTGAGGGGTGTGAGAAGAAGAGGTATGACTGTGCAAGGTTTGAG  
GAACTTCG

TTCTTTCTTTCAATGTAACGCTTGTGGTCTCTGTTAGAAAGAGTCATCTGGGACATCTTTCGTTCCAAGAATC  
AAAGGTTCTCCAGGAGTCAAATCTGTGCCAGAAAGCATAGAATTGTTCAACTTCTTCTTGGAAAGAATCTT  
TGTTACCT

GCTACAGATGATCAGACGCAAGGGAAGACCATCGACCACATGTGGCCATTGTAAAGAGCTGAGAAGAACCA  
AGAATTTCAACCCATCCGGTGGGTGCATGTGTGCCTCTGCACGACGGCCAGCTGTTGGCAGCAAGGAAGAT  
GAAACAG



CGACAGCATTAGTAGTAGAAGTGCTGGTAGTAGAAGTACTGGTGGTAGTGGTTGTCGTAGTTGCAGTGTCA  
GCAGTTGCTTCAGTGGCCTCAGATGTGGTAGTAGAAGTAACGTCCCCTTCATCTGATGAAGACGATGACGA  
TGACGATG

GGTAATGTGCCAGTTAGAGGCCATAGCTTTGTTTTGGGGTCATCATGCCGTGCTGTTGGTACTGTCCATTC  
TGTGGAGGTGGTACTGAAGCAGGTTGAGGAGAGACATGATGATGGTTCTCTGGAACAGCTGATGTCCCAGG  
TGTTGTCT

TGCTTCATCAGCACTATTTTCGACAGCATTAGTAGTAGAAGTGCTGGTAGTAGAAGTACTGGTGGTAGTGG  
TTGTCGTAGTTGCAGTGTGAGCAGTTGCTTCAGTGGCCTCAGATGTGGTAGTAGAAGTAACGTCCCCTTCA  
TCTGATGA

TGGTTTCAGCTTCACTTTTCGCTGTCAGAAGACGATGAAGAAGAGGATTGAGAATCAGAGGATGAAGATGAA  
GATGAAGATTGAGATTGAGACTCAGACTCAGATTGAGATTGAGATTGAGATTGAGATTGAGATTGAGATTGAG  
GGAGGAAG

TGGTTTGGCTTGGATAGTCCATTGACAAAACCTGGATCCTACGAGCATAACCATTCACTCCAATCATCTCTGT  
CCGGATCTGCCTCAATGCCGATGACCAAACCTGGCTGGTGTGATATCTCATCACTTGAGAGAAGTGAGGGC  
TTTGAGTT

CGGCTACTCAATCCACAACCTCTATCTTTTTACCGACGCAAACAGCAGTTCTGCTTCCGCTCCATTGGAAGTG  
GCAACGTCTACGCCAACCCCATCTTCAAAGGCATCCTCTCTGTTGCTTACACCATCAACATCCTCTTTAAG  
TCAGGTTG

CGGTGACTTACCACCATGTTGACTGGTATTGCCCCAGACCAAGTGACCAGAATGATCACCGGTGTTCCAT  
GGTACTCCAGCAGATTAAAGCCAGCCATCTCCAGTGTCTATCCAAGGACGGTATCTACACTATCGCAAAC  
TAGAGACA

ATCCTTGGATTCTTCTTCTTGGTTTTGAGCTTCACTTTTCGCTGTCAGAAGACGATGAAGAAGAGGATTGAG  
AATCAGAGGATGAAGATGAAGATGAAGATTGAGATTGAGACTCAGACTCAGATTGAGATTGAGATTGAGATT  
GAAGATGA

CGTTTTGTCTCTAGTTTGGGATAGTGTAGATACCGTCTTGGATAGAGCACTGGAGATGGCTGGCTTTAATC  
TGCTGGAGTACCATGGAACACCGGTGATCATTCTGGTCACTTGGTCTGGGGCAATACCAGTCAACATGGTG  
GTGAAGTC

ACGGAAATAGAACCTCTGATGAAAATCAATTTGTTCTGTTCCACCAAATTTGACAGAGGAGTGTGTTGCCA  
CTCCTGCCTATGAACAGATAACAGATTCTGTGAATTCAAGGTGGACAAGGAGTTGCCATTATTGTTTGGAT  
ATTCCGTG

GTACGAGGCTTCTTTGCCCAATTTATTGACATCACCTGGAATGCAGGCGGTGGACGGTTGTACATCTGT  
CCACGGACTTGGTTGCGACAGCGCAGTCTGTGCTTGGTTTTGGAAACGTGCATGCACCTTACCTGCACCAAT  
ATGCCCAT

TAGTCTTGGAACTCTGCCTGTAGCACCTCGTCTCTGATTTACCACCAGAACCTGTAGCAGCACCTGGG  
AAAGGAGACACGGCTGTTGGATGGTTGTGAGTTTTGACTTTGATAAGTAATGGAATTTCTTTCTTTGTAGA  
GGTCCATT

GTGAGCATATGTTTGGGATGAGGACGTTGCTGGCATTGTGAGGGCCTTTGGTGGGGTCTTGATTGGTGCC  
CTTGCGCCAAGTTAGCTGCTGGTCTTGGTGGTCTGGCGGTTGAGATTGCAATCTCTCCTTCTCCTTGGAT  
ACGTCCTC

ATCCAAGATTTCTTCTTTGGCATAACGAATAGATTTAATATTGCTCTTGGCCTTCTCACGCCCCACTTTCA  
AGAAATTCGAGTTGTCTGACCTCATGGACATACCTGTGTGGCTCATCGTAACACCAACGGTTTTTCATCCAAA  
GTTGTGAT

CCAACTTGACGAACTTTGGAGACAATTGGATAACCAGCGGAAGCATCGAAGATGGAAGAGTGAGAGTCACCC  
AAGAAGTCAGAGGAGACAACAGCGTCTTCGGTGTAACCCAAAACACCCTTCAACTTACCTTCAGCGGCAGC  
CTTAACAA

TCAGAGGAAGAGGAAGAGGAATCCTTGGATTCTTCCTTCTTGGTTTCAGCTTCACTTTTCGCTGTCAGAAGA  
CGATGAAGAAGAGGATTTCAGAATCAGAGGATGAAGATGAAGATGAAGATTTCAGATTTCAGACTCAGACTCAG  
ATTCAGAT

TTGATGGTCCTTTCTTCTGTGCTGGCAACTTGGGGTGACCAGCAAGCTGTGGCTGCCAAGGCTGCTTCATT  
GGCTGAAGGAGCAGCCGGTGTGTTGCCTCCTTTAACCCAGGTTATTTCTGGATGTTACCAACTGTATCA  
CTTCTGCA

GACGATAACAACGAAGGAGATGGCTCTGACAATCACGAGGAAGGTGGAGAAGAAGGAAGTAGAGGAGCTGA  
TGCTGATGTGTCCAGTGCACAGCAGCGTGCCGAAAGGGTTGCGGACCCATGGATATATCAAAGATCTAGAT  
CAGCTATT

CACCAGTGATCATGTTGTCAACCAAAGACTTGACGGTTCTCAAAGCAGCAACGTGCTTTCTGCCACCGTTG  
TGAACAGCAACCTTGATCAATTGGTTGTTGACCTTGGTGAAGGTAACATCAATGTGCTTCAAGTTCTTGGT  
CAAAGTAC

CATTGGCCTTGATCTTATCGGCGGTGGACACTAACTCTTCGTCATTCAAAGTGTCAACGATCAAACCAACT  
TGTTTCGTCAATCGTGGTGGCCTTGTGAGCATCACCAAAGTAGTCAGCTTCTTAGCAGAGTTACGGATGGC  
TCTCTTGT

GACAATTGGATAACCAGCGGAAGCATCGAAGATGGAAGAGTGAGAGTCACCCAAGAAGTCAGAGGAGACAAC  
AGCGTCTTCGGTGTAACCCAAAACACCCTTCAACTTACCTTCAGCGGCAGCCTTAACAACCTTCTTGATTT  
CATCGTAG

ATCTCATCTTGTACTTGTAAACCTTGGTGACACCAGTGATCATGTTGTCAACCAAAGACTTGACGGTTCTC  
AAAGCAGCAACGTGCTTTCTGCCACCGTTGTGAACAGCAACCTTGATCAATTGGTTGTTGACCTTGGTGAA  
GGTAACAT

AAGAGTGTGAGTGAGCATATGTTTGGGATGAGGACGTTGCTGGCATTGTGCGAGGGCCTTTGGTGGGGTCTT  
GATTGGTGCCTTGCGCCAAGTTAGCTGCTGGTCTTGGTGGTTCGTGGCGGTTGAGATTGCAATCTCTCCTC  
TTCCTTGA

ATTCCTCAACGGTAGATTTCGGTGATTTCGTCTTCTCCTGCGTTTCGGTGACTTGGATCTGTGTGGTTTCAGACT  
TGATCAGGCAATCAGCGAACAAATGTCTCGAATTATGGTCCACCCCTACTTCCATCAACGACGTCGCCTTC  
TTGGTCAT

TCTTCGTCTACTAGCGATGATGAAGAGGGAGATATTATTGCCAGACGACAGAGCCCAAGCAAGATGCCAG  
TCCTGATGATGATCGCTCAGGCCATTCTTCGCCAGAGAGGAGGACAACAGCAAATACGTGCCAAAGAAG  
CTTCGGGA

TACAACCTCAAGTTCGTCCGTTTCTCAAGTTTCAGACACGTCAGTACCTTCTACAAGTTCCAGATCGTCCG  
TTTCTCAAGTCTCAGACACTCCGGTGCCTTCTACAAGTTCAAGGTCGTCCGTTTCTCAAACATCTAGTCA  
CTACAGCC

ATTGACAAAACCTGGATCCTACGAGCATAACCATTCACTCCAATCATCTCTGTCCGGATCTGCCTCAATGCCG  
ATGACCAAACCTGGCTGGTGTGATATCTCATCACTTGAGAGAAGTGAGGGCTTTGAGTTCTTATAAGGAAT  
AGGTTTAT

GATCAGGGCCTTTTCGGAAGACTTTTACATATTTCTTTATTGGCGCAGCCACCACAAGCATCGGACTTACCT  
GCCATGTCTGATTCTGGACCAGGACAGTGTTCGGTTCGGCTGATTAAGTTCATACTCTGCTGGTAGCAC  
TTCGTCGT

GGAAGAAGAGTCAGAGGAAGAGGAAGAGGAATCCTTGGATTCTTCCTTCTTGGTTTCAGCTTCACTTTTCGC  
TGTCAGAAGACGATGAAGAAGAGGATTGAGAATCAGAGGATGAAGATGAAGATGAAGATTGAGATTGAGAC  
TCAGACTC

AGTTCGTCCGTTTTCTCAAGTTTCAGACACGTCAGTACCTTCTACAAGTTCCAGATCGTCCGTTTTCTCAAGT  
CTCAGACACTCCGGTGCCTTCTACAAGTTCAAGGTCGTCCGTTTTCTCAAACATCTAGCTCACTACAGCCCA  
CCACTACA

GAGAAGAACCAAGAACTTCAACCCATCCGGTGGGTGCATGTGTGCCTCTGCACGACGGCCAGCTGTTGGCA  
GCAAGGAAGATGAAACACGATGTCGTTGTGATGAGGGTGAACCTTGTAATGTCATACCAAGAGGAAAAGC  
AGCCGGAA

ATGCGCCAGGCAATGCAGAGGACAAGACAACGTAGGTGAGTCCGTGAATGGTGTTC AACAGCCGGCCTCC  
TCCAGTCAGATGCCATGAAACAAGACAAGTACGTCAGCACTAAACCAAGAAATAGTAAGAACGATGGTGT  
GGATACAG

CATGCACTGCTGTGGGTACGGCCATTCTGTGGAGGTGGTACTGAAGCAGGTTGAGGAGAGGCATGATGGG  
GGTTCTCTGGAACAGCTGATGAAGCAGGTGTTGTTGTCTGTTGAGAGTTAGCCTTAGTGGAAGCCTTATCA  
TATTCTTG

TCAGACACACCGGTTTTCTTATACAACCTTCAAGTTCGTCCGTTTTCTCAAGTTTCAGACACGTCAGTACCTTC  
TACAAGTTCCAGATCGTCCGTTTTCTCAAGTCTCAGACACTCCGGTGCCTTCTACAAGTTCAAGGTCGTCCG  
TTTTCTCAA

CAGAGTCCGCTGAGGATGAATCAGTAAATGTATTACCTGACTCAGGTGATGGAGTGCTCAGAGGCGTTCCA  
ACTGATGATGGATACTGCGGAAACTGTGATTGTGGCCAGGTGGAAAGTACATAGGCGACATTTGATAAGG  
TGTATACG

CTCCAACACTAGTGCTACTACCACCGAAAGTACCGACTCCAACACTAGTGCTACTACCCTGCTAGCACCA  
ACTCCAGACTAATGCCACTACCCTGCTAGCACCAACTCCAGCACTAATGCCACTACCCTGAAAGTACC  
AACGCTAG

CTACTACCCTGCTAGCACCAACTCCAGCACTAATGCCACTACCCTGCTAGCACCAACTCCAGCACTAAT  
GCCACTACCCTGAAAGTACCAACGCTAGTGCCAAGGAGGACGCCAATAAAGATGGCAATGCTGAGGATAA  
TAGATTCC

TTGCTGCCGTTGGGGTGTATGGTTTTCCACAGATCTGGTGAAACTGAAGACACTTTTCATTGCTGACTT  
GGTCGTCCGTTTTGAGAACTGGTCAAATCAAGACTGGTGTCCAGCTAGATCCGAAAGATTGGCTAAATTGA  
ACCAATTG

TACTCAATAACAAACGTAATAACCTGGATCCGACTGAATTGCATCGTTGGATGCAAGAAGGACACACTAC  
TACGCTGAGGGAGCCTTTCCAGGTAGTGGATGTGCGAGGCTCAGATTATATGGGGGGCCATATCAAGGACG  
GATGGCAC

CAAGTTCAAGTTGATCGACATTAAGAATTAAGGCACGACAAGAAGTGAACAGTGATAAGAAGGACAACG  
GTCCTAAGACCATTCAACAGATTCATGAGGAAGAGGAGAGACAACGTCAATTGAAGAATAATTCAAGATCT  
AATTCAAG

GCAGCACCGGTGGAGGATGGGATGATGTTACCGGAAGCGGTTCTACCACCTCTCCAGTCCTTGTGGGATGG  
ACCGTCAACAGTCTTTTGTAGTAGCAGTCAAAGAGTGGACAGTGGTCATCAAACCTTCTTCAATACCGAAAG  
CATCGTTG

TGCTTCTCTACGGAAATAGAACCTCTGATGAAAATCAATTTGTTCTGTTCCACCAAATTTGACAGAGGAG  
TGTGTTGCCACTCCTGCCTATGAACAGATAACAGATTCTGTGAATTCAAGGTGGACAAGGAGTTGCCATTA  
TTGTTTTGA

CTATATTAATCAAGTTATAAAGCCTTCTTGGCGGCATCAGCAGGGGAAACCTTGTTTTCTCTGTTGAATCT  
TGGTCTTTGAGGTGGAGCTCTGTTCTTTCTGTCTTCTCTGGATCTGACTCTGACAATTCTGGCGTGAATAG  
CACAAGAA

AGCTGCAGCGTTAACAACGCCGAAAAGGCTGATATGGGGGATGGAGTTGCAGGAGCATCTGTCTGCATTG  
CATTCTGGGTCCCTAGTTGTGGCTGAAAGTGGTTGAAGTTGAGGTTGCTGTTGAGGTTGCTGTTGAGGTTGC  
TGTTGAGG

CCAGCACTAATGCTACTACCACTGCCAGCACCAACGTGAGGACTAGTGCTACTACCACTGCCAGCATCAAC  
GTCAGGACTAGTGCGACTACCACTGAAAGTACCAACTCCAGCACTAATGCTACTACCACTGCCAGCACCA  
CGTCAGGA

GGTAGATTCCGGTGATTTCGTCTTCTCCTGCGTTCGGTGACTTGGATCTGTGTGGTTTCAGACTTGATCAGGCA  
ATCAGCGAACAATGTCTCGAATTATGGTCCACCCCTACTTCCATCAACGACGTCGCCTTCTTGGTCATCA  
ACTACTTG

GACGACCGTTTTAGAACCATCAACGACTAACAGTTCAGTACGTTTAGTCTGGTCACTTCAAGTGACAACA  
ATTGGTGGATTCCAACCTGAGTTAATCACGCAGGCACCAGAAGCTGCATCCACTGCATCTTCTACCGTTGGA  
GGAACACA

TGGAGGATGGGATGATGTTACCGGAAGCGGTTCTACCACCTCTCCAGTCCTTGTGGGATGGACCGTCAACA  
GTCTTTTGGAGTAGCAGTCAAAGAGTGGACAGTGGTCATCAAACCTTCTTCAATACCGAAAGCATCGTTGAT  
AACCTTGG

TTTCTTCCACGACCCTAAATTCATTCCAAACAAACCATACAGACAATTCAACACATGGTGTGGTGAACCTG  
CAAGAATGATCATTGCAGGTGCCATTGGACAGGAAATCTCCGACAAGAAGTTGACTGAACAATGTTCAAGA  
GTAGGTGA

GAAGTATCATGCTCGAATGGTGAAAACATACCTGTAGAGTTGGAACCACCCCAACACATGCAACAACCTGC  
GTCAGGTAATTTACCATTGTTTCATGGCAGCAAACCTGTTCCCTTGGTTTTCTTTACCAATGACACTTTGGAAAG  
TTCTAACC

GTGCAGGATATTTCTTCCACGACCCTAAATTCATTCCAAACAAACCATACAGACAATTCAACACATGGTGT  
GGTGAACCTGCAAGAATGATCATTGCAGGTGCCATTGGACAGGAAATCTCCGACAAGAAGTTGACTGAACA  
ATGTTCAA

CACAGGCACAGGCACAGGCTCAAGTTCAGGCTCAGGCTCAGGCTCAGGCCAGGCTCAGGCTCAAGCACAG  
CAGATCCAGATGCAACAGCTTCAGATGCAGCAACAGCAACAGGCGCCATTATCTTTTCAGCAAATGTCGCA  
AGGAGGAA

CCAGCATCAACGTCAGGACTAGTGCGACTACCACTGAAAGTACCAACTCCAGCACTAATGCTACTACCACT  
GCCAGCACCAACGTCAGGACTAGTGCTACTACCACTGCCAGCATCAACGTCAGGACTAGTGCGACTACCA  
TGAAAGTA

AGTGCGACTACCACTGAAAGTACCAACTCCAGCACTAATGCTACTACCACTGCCAGCACCAACGTCAGGAC  
TAGTGCTACTACCACTGCCAGCATCAACGTCAGGACTAGTGCGACTACCACTGAAAGTACCAACTCCAACA  
CTAGTGCT

AGTAACCGTATTTCGTTGTCGTACCAGGAGACCAACTTGACGAACTTTGGAGACAATTGGATACCAGCGGAA  
GCATCGAAGATGGAAGAGTGAGAGTCAACCAAGAAGTCAGAGGAGACAACAGCGTCTTTCGGTGTAACCCAA  
AACACCCT

AAGACTTGACGGTCTCAGTCTTAGTTAACTTAAGTTGATTTGCACGAGAGTTGGTTTTTGGGGGACATAC  
TGTTGAGGTTGTTGGCCCTCAACGTCACCATGGAAGTGTGTTGAGGTTGAATGAAACAACAGATTCTTG  
ATCACTCA

TAGAAGTACTGGTGGTAGTGGTTGTCGTAGTTGCAGTGTGACAGTTGCTTCAGTGGCCTCAGATGTGGTA  
GTAGAAGTAACGTCCCCTTCATCTGATGAAGACGATGACGATGACGATGACGATGACGATGACGATGATGA  
TGTAAGAAG

CCCCAACCTGGGTACCGTCATCCAGAACCACACCTTTGATGACCTTGTGGCCACATCCGGGGTCATACAAG  
ATCAAGTCAGCAACTTTGTTCTGCAGCAGAGACAAGTTGGGGTGTGCTTTCTTGTGCGAAAGTTCCCTTTG  
CATGTATT

CAAGCCTTCTTTCAAATACGCCAGACAATTGATTTCTAACGAAGGTGTCTTGGTGGGTGGTTCTTCCGGTT  
CTGCCTTCACTGCGGTTGTGAAATACTGTGAAGACCACCCTGAACTGACTGAAGATGATGTCATTGTTGCC  
ATATTCCC

AATCTGATAGAATAACCAACTTCTTCGCCCAACTTGACATCCATTTCTCAGCAACTCTCTGTGCAACAGA  
CATTGCTGCGACACGACGAGGTTGAGTACATGCAACTTGAGTGTCTCTAAGTGTGGCATCTCATCGAATA  
AAACGAAT

CTAGCGATGATGAAGAGGGAGATATTATTGCCAGACGACAGAGCCCAAGCAAGATGCCAGTCCTGATGAT  
GATCGCTCAGGCCATTCTTCGCCAGAGAGGAGGACAACAGCAAATACGTGCCAAAGAAGCTTCGGGAGG  
TCCAAGTG

GTTGTCCGTTATCCCAATCAGAAGAGGTTACTGGGGTACCAACTTGGGTCAACCACATTCTTTGGCCACCA  
AGACCACTGGTAAGTGTGGTTCCGTCACTGTTAGATTGATCCAGCCCCAAGAGGTTCTGGTATCGTCGCT  
TCTCCAGC

TACTGACACGGACGATAACAACGAAGGAGATGGCTCTGACAATCACGAGGAAGGTGGAGAAGAAGGAAGTA  
GAGGAGCTGATGCTGATGTGTCCAGTGCACAGCAGCGTGCCGAAAGGTTGCGGACCCATGGATATATCAA  
AGATCTAG

TAACATCTTAACTCTTAGACCCAAGTGTCTAGCTTCGCTAACAGTTTGAGCAGTATCGTCTCTTGGTGGAT  
CCATACATGGCATAACACCCAAGATTTCCAGTGACCTTCACCTCTCTTTCTAGCAACACCTAAAGCACGG  
AACCTCT

CGCCACAATGCCTTGAATAAGTGAACCGTAAAGGTTATACAGCCTGAGCTTGGCGTTGAGCCACCAGCC  
CAGAAATGATACCGGAGCACAGACCAACTGTGACCACTTCTTCTCCGATCTGTAATCCAGAAGACACCAC  
GTCATCCC

GAGGAAGATTGAGTAGATGTAGCAGCAGAGCTGGAGGCTGGAGATGCGGCAGCAGAACTTGTGAGTTGTT  
CTCAGAAGAGGAAGCAGCAGCGGTAGCTACAGAAGCAGCAGACGATGTTGTACTGGTAGCGGCAGCTGGAG  
CGGAGTTG

CCTCCTCAGTTGGAGAATGTTATCTTGAATAAATACTATGCCACGCAAGACCAGTTCAACGAGAACAACCTC  
AGGCGCTCTGCCATTCCGAACCATGTGGTGCTTAACCACTTGGTTACTAGTAGCATTAAAGCACAATACAC  
TTTGTGTA

AATATCTGTTAACGATGGTGTAAATGAGAGTAGTATGCGCACCAGTCTTAGATGACGCAGCTGCAGCTTCGC  
AGCCTGCATGTCCAGCACCGATGACCACGACCTGTGTCTTGGTTGTGGGTTGGAAGCTTGTCAAAGAAGAT  
ATGGTCAA

TTGTAAGGCGTTTGTCTCTAGTTTGGGATAGTGTAGATACCGTCTTGGATAGAGCACTGGAGATGGCT  
GGCTTTAATCTGCTGGAGTACCATGGAACACCGGTGATCATTCTGGTCACTTGGTCTGGGGCAATACCAGT  
CAACATGG

TTTGAACGTCGTTTGAAGAATTTGTGCAAGATAAACGATTTCATTGCTCTAGAGGTATCTGATAATGATGA  
CGATTGTGACACTGATTTGACTGCTGACACAGCTGACGAGCTGGAAAGCTCTGCTATCTTAAAGATGAGGG  
AGTCTGAT

CAATGTAACGCTTGTGGTCTCTGTTAGAAAGAGTCATCTGGGACATCTTCGTCCAAGAACTCAAAGGTTCTC  
CAGGAGTCAAATCTGTGCCAGAAAGCATAGAATTGTTCAACTTCCTTCTTGGAAGAATCTTTGTTACCTAG  
AGAAGGAA

CTAGTAGAATCAAGTTCAAGTTGATCGACATTAAGAATTAAGGCACGACAAGAAGCTGGAACAGTGATAAG  
AAGGACAACGGTCTTAAGACCATTCAACAGATTCATGAGGAAGAGGAGAGACAACGTCAATTGAAGAATAA  
TTCAAGAT

CCCTTGGTGACACCAGTGATCATGTTGTCAACCAAAGACTTGACGGTTCTCAAAGCAGCAACGTGCTTTCT  
GCCACCGTTGTGAACAGCAACCTTGATCAATTGGTTGTTGACCTTGGTGAAGGTAACATCAATGTGCTTCA  
AGTTCTTG

GACTAGTGCTACTACCACTGCCAGCATCAACGTCAGGACTAGTGCGACTACCACTGAAAGTACCAACTCCA  
GCTAATGCTACTACCACTGCCAGCACCAACGTCAGGACTAGTGCTACTACCACTGCCAGCATCAACGTC  
AGGACTAG

GGTAAACATTACAAAATTCTCCAAATTCGAAAGAAGTAAATCAAGCCACAAGAATGAAAGGCGTGTCTTG  
AGATACAAACCTCCCTGGTGAGGATGTTTGAGAAGAATGTCATGCTGAATATCTACCCCAGAACAGTTATC  
GATATCGA

GCTGGTATCATTATTGCCAAGTTGTCCGTTATCCCAATCAGAAGAGGTTACTGGGGTACCAACTTGGGTCA  
ACCACATTCTTTGGCCACCAAGACCACTGGTAAGTGTGGTTCGTCCTGTTAGATTGATCCAGCCCCAA  
GAGGTTCT

TATGTTTTACCTATATTAATCAAGTTATAAAGCCTTCTTGGCGGCATCAGCAGGGGAAACCTTGTCTTCTC  
TGTTGAATCTTGGTCTTTGAGGTGGAGCTCTGTTCTTTCTGTCTTCTCTGGATCTGACTCTGACAATTCTG  
GCGTGAAT

CTGTCAGAAGACGATGAAGAAGAGGATTGAGAATCAGAGGATGAAGATGAAGATGAAGATTCAGATTCAGA  
CTCAGACTCAGATTCAGATTCAGATGAAGATGAAGATGAGGATGAAGATTCGGAGGAAGAGGAAGAGACGG  
CCTTAGCT

CGGTTTTCTTATACAACCTTCAAGTTTCGTCGGTTTTCTCAAGTTTCAGACACGTCAGTACCTTCTACAAGTTCC  
AGATCGTCCGTTTTCTCAAGTCTCAGACACTCCGGTGCCTTCTACAAGTTCAAGGTCGTCGGTTTTCTCAAAC  
ATCTAGCT

AACAAGTACTCAAACAGTGGTTGAAACAATTACTTTGGACCAGGAAGAGGCTAGCGCTGTTGCTAATCATG  
CGCAGCAGATGAGGCTTCCACAGACGTTGAAGGCTCCACAGACGTCAATGTCAATGAACAGGCTCTGTTG  
CAAGAGGA

CAAGTCGACAACCTCTGGTAGAGTAACCGTATTGTTGTCGTACCAGGAGACCAACTTGACGAACTTTGGAG  
ACAATTGGATACCAGCGGAAGCATCGAAGATGGAAGAGTGAGAGTCACCCAAGAAGTCAGAGGAGACAACA  
GCGTCTTC

TCATTCCAAACAAACCATACAGACAATTCAACACATGGTGTGGTGAACCTGCAAGAATGATCATTGCAGGT  
GCCATTGGACAGGAAATCTCCGACAAGAAGTTGACTGAACAATGTTCAAGAGTAGGTGATTATTTGTTCAA  
GAAATTGG

CGAGCATAACCATTCACTCCAATCATCTCTGTCCGGATCTGCCTCAATGCCGATGACCAAACCTGGCTGGTG  
TGATATCTCATCACTTGAGAGAAGTGAGGGCTTTGAGTTCTTATAAGGAATAGGTTTATTCAAATCTATTA  
TGTTGTTT

CAGGAAGAGGCTAGCGCTGTTGCTAATCATGCGCACGACGATGAGGCTTCCACAGACGTTGAAGGCTCCAC  
AGACGTCAATGTCAATGAACAGGCTCTGTTGCAAGAGGATTTTGCATGTGGAGTGAGACTATATTGCAGA  
AAACACAA

TTCATTACTATTATACATGTGATATCAGAACGGAAGGTTTTACTCAACTTGACTGCCATCCCTCGGTTTTGT  
AGTGAGGCAACAGCTCCACAACCTCAGCTGGTAGTCTACCATCGACCTTGATGGCGTACATACCAGCTATA  
CTATGATC

GAGATCTATTTTTACTCAGCGGTAATATTAGATCATGGCTAGGGGGATCTGGAAGTACAATGATGTGCTCT  
CCCCCTCTCAAACACAACACCAGGATGAACTAAGGGCTCATCTCGAAAGTCGAAGGTGCCTCATTTCAGGTT  
ATTAGTGG

TCAAGACTCTTTTCGCTGCCGGTTGGGGTGTATGGTTTTCCACAGATCTGGTGAAACTGAAGACACTTTCA  
TTGCTGACTTGGTCGTCGGTTTTGAGAACTGGTCAAATCAAGACTGGTGCTCCAGCTAGATCCGAAAGATTG  
GCTAAATT

GGTGATGCTATTGGTTACGATCCAACCTGCTCCTGTGCGAAGAAGGCGAAGAAGAAGAAAGTGAAAGTGAAAG  
TGAAAGTGAAGATCAAGTTGAGGAGGAAGATCAAGAAGTTGTTGCTGGAGAAGAAGATGATGACGATGACG  
AAGAGCTA

CTTCTTCTTTCTGGAAGCAGCCAAACAAGCAGTCAACATCAAGTCGTCTGGAGAAACACCTTCAACAGTGT  
ATGGTTTCGTGCAAGGACAACCTTGTCTTGGTCAAAGTACCGTTTTGTGCGGAACACAAGATTTTCGACACCA  
GCCAAGGA

TACTGGATTGACGTATCCAGCTTGGGGATTTAAACAAGCTGAAATCGTCTGCAAAGACTCCTGGAGTCGTA  
GGGACAAATCGACCTGGTGGAATGTAGAAGATCACTGGAACCACAATTTAGAAACCGCAGAAGATTACGTT  
CCACCAA

AGAGTCCGCTGAGGATGAATCAGTAAATGTATTACCTGACTCAGGTGATGGAGTGCTCAGAGGCGTTCCAA  
CTGATGATGGATACTGCGGAAACTGTGATTGTGGCCCAGGTGGAAAGTACATAGGCGACATTTGATAAGGT  
GTATACGG

CGCTATCTTCTTCTTTTCAAACGTGATGGGAGATGTCACGGTGTGACGACCGCTTTTCTCATCACCTTTCC  
TGCCACGGTAGTCATGGTTCCCTTGGTCCCAGGGAACTCCTCTGCCGTCTCGCTCATCACCGTCTCTCTCC  
TCTTCTT

CCACCGAAAGTACCGACTCCAACACTAGTGCTACTACCCTGCTAGCACCAACTCCAGCACTAATGCCACT  
ACCCTGCTAGCACCAACTCCAGCACTAATGCCACTACCCTGAAAGTACCAACGCTAGTGCCAAGGAGGA  
CGCCAATA

GTAGACTCTTTGGAATGAAAGGTTGGACATCCTTAATCATCCAACCTTTGATATCAGCTGGGACCTTTGGA  
GAGTTGTAAGCACAAAGGATTCTTGTCTTCTGGACTGATTTGGTAAACCAAGATTGGCATATGATCACT  
ACCAAGAA

AGTTTCGAAAGTTCAAGCTCTTTGATTTCTTCAATTTCAACATCCGTTTTGACTTCTTCAGTGTACGT  
TCCCTCTTCTTCAACTTCATCTCCACCTTCGTCCTCATCCGAATTGACATCATCTCTGACTCATCATCTT  
CATCTCA

GTCACCTCCATGGAATTGTCATCATTTTTTGTGATGGTCCTTTCTTCTGTCGTTGCAACTTGGGGTGACCA  
GCAAGCTGTGGCTGCCAAGGCTGCTTATTGGCTGAAGGAGCAGCCGGTGCTGTTGCCTCCTTTAACCAG  
GTTATTTT

TTGATCGACATTAAGAATTAAGGCACGACAAGAAGTGAACAGTGATAAGAAGGACAACGGTCTTAAGAC  
CATTCAACAGATTCATGAGGAAGAGGAGAGACAACGTCAATTGAAGAATAATTCAAGATCTAATTCAAGAC  
GTACGAAC

GCAGTCTTCTTCTTGTCTCTTTCGGCCTTGTCTTTCTTTCAATGTAACGCTTGTGGTCTCTGTTAGAAGA  
GTCATCTGGGACATCTTCGTCGAAGAAGTCAAAGGTTCTCCAGGAGTCAAATCTGTGCCAGAAAGCATAGA  
ATTGTTCA





CTGCAACAACCTCCGGCTATCCCTACTAAATCTGATGAAGCTGAAGCTGAAGTTGAGGCTGAAGCAGGTGAT  
GCTGGAACAAAGATTGGACTTGAAGCTGAAATCGAACTACAACCTGATGAACTGATGATGGTACAAACAC  
CGTTTTCTC

GGAAGAGGCACATTCATTGCCTGGGATTTGCCTACTGGTGAGAAGAGAGACTTACTATTGAAGAAATTGAA  
GTTGAATGGTTGCAACGTTGGTGGATGTGCAGTCCATGCAGTGAGATTAAGACCTTCATTAACATTGAGG  
AGAAGCAT

TACCAACTCCAGCACTAATGCTACTACCACTGCCAGCACCAACGTCAGGACTAGTGCTACTACCACTGCCA  
GCATCAACGTCAGGACTAGTGCGACTACCACTGAAAGTACCAACTCCAACACTAGTGCTACTACCACCGAA  
AGTACCGA

AGCTTAGAAGGGGAAGTGGATACTGACACGGACGATAACAACGAAGGAGATGGCTCTGACAATCACGAGGA  
AGGTGGAGAAGAAGGAAGTAGAGGAGCTGATGCTGATGTGTCCAGTGCACAGCAGCGTGCCGAAAGGGTTG  
CGGACCCA

CTACTACCACTGCCAGCACCAACGTCAGGACTAGTGCTACTACCACTGCCAGCATCAACGTCAGGACTAGT  
GCGACTACCACTGAAAGTACCAACTCCAACACTAGTGCTACTACCACCGAAAGTACCGACTCCAACACTAG  
TGCTACTA

TGCTTGACCAGCGTGTGAATGCTTCTCTACGGAAATAGAACCTCTGATGAAATCAATTTGTTCTGTTC  
CACCAAATTTGACAGAGGAGTGTGTTGCCACTCCTGCCTATGAACAGATAACAGATTCTGTGAATTC AAGG  
TGGACAAG

GTACTTGTAACCCCTTGGTGACACCAGTGATCATGTTGTCAACCAAAGACTTGACGGTTCTCAAAGCAGCAA  
CGTGCTTTCTGCCACCGTTGTGAACAGCAACCTTGATCAATTGGTTGTTGACCTTGGTGAAGGTAACATCA  
ATGTGCTT

ATCTGGTTACATATCTGTTTATATGACTGAAAATATCTACATAGATTCAGAAGCGTCCAAGGATGTTGACA  
ACAAGTGCTGTCCAGCCTGTGAAATGCTCAGCACCAGTACCATGACCATCTATCGGACTGTAATTTTCATA  
ACAATAAC

AATCTTCAGTATGAGTTGACGGAGGTGTGGAATCGGTTGGACTCACAGCTTTTGAAAGGACATTTCTCGGT  
TGCTCAGGATGTAGTTCAATGTCCGATTGGAAGTCATGGTCAGATTCTATGTTAAGATCATTGGATTCTTG  
GATCTCAT

AAAGTACCGACTCCAACACTAGTGCTACTACCACCGAAAGTACCGACTCCAACACTAGTGCTACTACCACT  
GCTAGCACCAACTCCAGCACTAATGCCACTACCACTGCTAGCACCAACTCCAGCACTAATGCCACTACCAC  
TGAAAGTA

TTCACTTTTCGCTGTCAGAAGACGATGAAGAAGAGGATTGAGAATCAGAGGATGAAGATGAAGATGAAGATT  
CAGATTCAGACTCAGACTCAGATTCAGATTCAGATGAAGATGAAGATGAGGATGAAGATTCGGAGGAAGAG  
GAAGAGAC

TGTATGATATAAGCAAATCAAGTTCATACGAAAATTGCAACCACTGGCTTACCGAACTGAGAGAGAACGCA  
GATGACAACGTGGCTGTTGGGTTGATAGGGAACAAATCAGATCTGGCTCATTTAAGAGCAGTACCAACCGA  
TGAAGCGA

ACTGCCAGCACCAACGTCAGGACTAGTGCTACTACCACTGCCAGCATCAACGTCAGGACTAGTGCGACTAC  
CACTGAAAGTACCAACTCCAGCACTAATGCTACTACCACTGCCAGCACCAACGTCAGGACTAGTGCTACTA  
CCACTGCC

TCCACTAAGGTTAATTTCTCAACAAGAGACAACACCTGGGACATCAGCTGTTCCAGAGAACCATCATCATGT  
CTCTCCTCAACCTGCTTCAGTACCACCTCCACAGAATGGACAGTACCAACAGCACGGCATGATGACCCCAA  
ACAAAGCT

CGTCAGGACTAGTGCGACTACCACTGAAAGTACCAACTCCAGCACTAATGCTACTACCACTGCCAGCACCA  
ACGTCAGGACTAGTGCTACTACCACTGCCAGCATCAACGTCAGGACTAGTGCGACTACCACTGAAAGTACC  
AACTCCAA

CTATCTTTTACCGACGCAAACAGCAGTTCTGCTTCCGCTCCATTGGAAGTGGCAACGCTCTACGCCAACCC  
ATCTTCAAAGGCATCCTCTCTGTTGCTTACACCATCAACATCCTCTTTAAGTCAGGTTGCTACAAATACTA  
ATGTACAG

TGGTAGTACTGAGAATAGAGCCTCACAGGATATGTATCTCTATGAAGCGATGCCACCAACGCTGCCCCACA  
GGGATTGGAAGGACTATTTTGTGATGGCTACTGCCACAGCTGGGCTGTTGTATGGTGCATATGAAGTAACT  
AGAAGGTA

ACAGTCAAACATTGATGAATCTGCAACAACCTCCGGCTATCCCTACTAAATCTGATGAAGCTGAAGCTGAAG  
TTGAGGCTGAAGCAGGTGATGCTGGAACAAAGATTGGACTTGAAGCTGAAATCGAAACTACAACCTGATGAA  
ACTGATGA

TTGTTGAAGGTCAACCAAATCGGTACCTTGTCTGAATCCATCAAGGCTGCTCAAGACTCTTTTCGCTGCCGG  
TTGGGGTGTATGGTTTCCACAGATCTGGTGAACCTGAAGACACTTTCATTGCTGACTTGGTCGTCGGTT  
TGAGAACT

TTGTTGTCTAAGAGAAAGTTACAATGGATGGTTGACAAGGACTTGGTCGAAATTGGGACGATCCAAGGTT  
CCCAACTGTGAGGGGTGTGAGAAGAAGAGGTATGACTGTGGAAGGTTTGGAGAACTTCGTCTTATCCCAAG  
GTCCATCC

CCAGAGCCGGTCAAAGAACCAGATTTAAGGCTGTTGTGCTTGGTGGTACTCTAACGGTCACGTTGGTTTG  
GGTATCAAGACCGCCAAGGAAGTTGCTGGTGCCATCAGAGCTGGTATCATTATTGCCAAGTTGTCCGTTAT  
CCCAATCA

CGTTAGAACCTTGGTTGTCTAAGAGAAAGTTACAATGGATGGTTGACAAGGACTTGGTCGAAATTGGGACG  
ATCCAAGGTTCCCAACTGTGAGGGGTGTGAGAAGAAGAGGTATGACTGTGGAAGGTTTGGAGAACTTCGTC  
TTATCCCA

TGAAAGAAATCGAGAGGGTTTTAGAAGTAGTTTTAGGGTCATTTTTTTCAGTACATTGGTTGGCCTGGCTTGAGT  
TGCAACCAGTGCCAAGCATCAGCGTTGGCCTCTCTCTTGTACATTGGTTGGCCTGGTCTCAAATTTAACCA  
GTGCCAAG

GGTTATTTTCGGTAAGGTTGGTATGAGATACTTCCACAAGCAACAAGCTCATTCTGGAAGCCAGTCTTGAA  
CTTGGACAAATTGTGGACATTGATCCCAGAAGACAAGAGAGACCAATACTTGAATCTGCTTCTAAGGAAA  
CTGCTCCA

TTGGTATTTCTTTGGCCAACCAACAAGTCGTTCAAACCTTAAACTGAACTTGGTCTCTTCAACTGTACGGA  
ACTCTGAGTTTGTGCTCTGAGACTTCCATTGTTGTTTGGATTTGCATTGTTCAATCCTTGAAAATCCGTTA  
AAGATCGC

ACTACCAACTCCAGCACTAATGCTACTACCACTGCCAGCACCAACGTCAGGACTAGTGCTACTACCACTGC  
CAGCATCAACGTCAGGACTAGTGCGACTACCACTGAAAGTACCAACTCCAGCACTAATGCTACTACCACTG  
CCAGCACC

GTCCTTGCTCAAGGAATGCGATGACATTGGTACAGCAAACATAGCTCAGGACCGTGGACGACTTCTGGGGG  
TTGCCACCAGTGACAACCTTCAACCACGGAAGTTCAAGGAAGAACGAATAACGATTTGCAACAGGGGCAG  
ATGCAAAT

TTCAGACACGTCAGTACCTTCTACAAGTTCCAGATCGTCCGTTTCTCAAGTCTCAGACACTCCGGTGCCTT  
CTACAAGTTCAAGGTCGTCGGTTTCTCAAACATCTAGCTCACTACAGCCCACCACTACATCCTCCCAACGT  
TTCACCAT

ATTCTTCAACATCAAGTGCCGTTCTCTGGATTGACACCTAATGCTGTGGTCTTGGTTGCTACTGTTAGGG  
CATTGAAGTCACACGGTGGTGCTCCAGATGTCAAACCTGGCCAACCTTTACCTTCCGCATACACTGAAGAG  
AATATCGA

TGTCTATATCCTCGCTGAATCCATCTAATGCATTATCAAGAGCCCTCGGTATTGCATCAACGAGATTGTTT  
GGTGGTGCAAATCAACAGCAGCAACAGCAACAAATCACATCTTCCCCACCGTACAGTCAAACCTTGTGAA  
TTCCCAAC

CCTACTGGTGAGAAGAGAGACTTACTATTGAAGAAATTGAAGTTGAATGGTTGCAACGTTGGTGGATGTGC  
AGTCCATGCAGTGAGATTAAGACCTTCATTAACATTTCGAGGAGAAGCATGCTGATATCTTTATTGAAGCAT  
TAGCCAAA

AGGAAGAGGAATCCTTGGATTCTTCTTCTTGGTTTTCAGCTTCACTTTTCGCTGTCAGAAGACGATGAAGAA  
GAGGATTCAGAATCAGAGGATGAAGATGAAGATGAAGATTTCAGATTTCAGACTCAGACTCAGATTTCAGATT  
AGATGAAG

TCTTATTATATCTTTAAATATGTACATACGCTTGTGTTTATACGTGGAGGCGACAAAAAGGGTTGGTTGAAGG  
GAGAGAGAAAGAGACGCACAGAGATTGGAGGAGGGGCTCAGTTCGCTGATTGTTTTCTTCTTCTGTGTTAGG  
TTTTCCAA

TTCGTGTCTTGAAGCACTCGTATAAAGTCTCTTAGTTTCGTCGGAGGCATGTTGCATTTACCAACTGTCA  
TAATCTCCCTGCCATCCTTCACTCTGTTTCTGATGAATTGATTCACTTCTTGTGGAACCTCGTGAATACGT  
GGTCCATT

GTAGGCGTATAAGAGTGTGAGTGAGCATATGTTTGGGATGAGGACGTTGCTGGCATTGTGAGGGCCTTTG  
GTGGGGTCTTGATTGGTGCCCTTGCGCCAAGTTAGCTGCTGGTCTTGGTGGTCTGGCGGTTGAGATTGCA  
ATCTCTCC

ATATATGTCAGAAATTGGTTGAGCCTTACCTAAAGTTTCAAGTAGTTGAGATACAGTTGGCATCTCAATAT  
CGGAAGTGGAAGGTTCTGTCTCCTTCACTGTGTTCTCCTCTGTGGTGATTACGGAATTTATTGTTTCGTCG  
TCACTTTT

TGTACTCACACTGATGGTCCGCTACAGATGATCAGACGCAAGGGAAGACCATCGACCACATGTGGCCATTG  
TAAAGAGCTGAGAAGAACCAAGAACTTCAACCCATCCGGTGGGTGCATGTGTGCCTCTGCACGACGGCCAG  
CTGTTGGC

CCATCTAATGCATTATCAAGAGCCCTCGGTATTGCATCAACGAGATTGTTTGGTGGTGCAAATCAACAGCA  
GCAACAGCAACAAATCACATCTTCCCCACCGTACAGTCAAACCTTGTGAAATCCCAACTTTTTTCATGAAC  
TACTGAG

CAGCAGTTCTGCTTCCGCTCCATTGGAAGTGGAACGCTCTACGCCAACCCCATCTTCAAAGGCATCCTCTC  
TGTTGCTTACACCATCAACATCCTCTTTAAGTCAGGTTGCTACAAATACTAATGTACAGACGAGTTTAAAC  
ACGGAATC

TACGACGGTTGACATTTGGAAGGCATTGGTTCCAAATACTCCAAGAGCTGTGAAAGAGATCCTTCCAACAT  
TGACTGGTATGATAGTCACTCACTTGGCTTTCATCATCCAATGTATTACGCAACATTGCTGCTCAGACCTTA  
GGTGATCT

ACTGTCCATTCTGTGGAGGTGGTACTGAAGCAGGTTGAGGAGAGACATGATGATGGTTCTCTGGAACAGCT  
GATGTCCAGGTGTTGTCTCTTGTGAGAATTAACCTTAGTGGAATCTCTATCAAATTCGGTAAATTGGA  
AGCTGAAA

TACCAGCGGAAGCATCGAAGATGGAAGAGTGAGAGTCACCCAAGAAGTCAGAGGAGACAACAGCGTCTTCG  
GTGTAACCCAAAACACCTTCAACTTACCTTTCAGCGGCAGCCTTAAACAACCTTCTTGATTTTCATCGTAGGT  
GGTTTCTT

GCGAATATTGGTTTTAGAAACACGTTTTCGAATCTTCAGTATGAGTTGACGGAGGTGTGGAATCGGTTGGAC  
TCACAGCTTTTTGAAAGGACATTTCTCGGTTGCTCAGGATGTAGTTCAATGTCGGATTGGAAGTCATGGTCA  
GATTCTAT

ATACCATCCAGGTTATTTTCGGTAAGGTTGGTATGAGATACTTCCACAAGCAACAAGCTCATTTCTGGAAGC  
CAGTCTTGAACCTGGACAAATTGTGGACATTGATCCCAGAAGACAAGAGAGACCAATACTTGAAATCTGCT  
TCTAAGGA

CTGATGGTCCGCTACAGATGATCAGACGCAAGGGAAGACCATCGACCACATGTGGCCATTGTAAAGAGCTG  
AGAAGAACCAAGAACCTCAACCCATCCGGTGGGTGCATGTGTGCCTCTGCACGACGGCCAGCTGTTGGCAG  
CAAGGAAG

GGGTGCAAGGATCACTCAAAGTTGCATTTAAATCTGGATTATGTTCACTGGTCCAAAAATCGATGTGTCTC  
CAAGCTAAGAGGGTTTCAGAGACACCATCGTTTGACTCCGTGGACGTAAATTCATCAATATTTATGTCTTC  
ATTAGATG

TTTAAACACGACTTGAAGATTGTTAAATTAAGCTCCGCTAATGCCGACAATTTGACTTCCAATCTCCGTT  
TGCTGTCTTGTCTGATGATGAAACGTCCCAACATTTACCACCTACCTAATCTCTCCAGCTGAACATCCAA  
CAATTTGT

CCAACGTCAGGACTAGTGCTACTACCACTGCCAGCATCAACGTCAGGACTAGTGCGACTACCACTGAAAGT  
ACCAACTCCAGCACTAATGCTACTACCACTGCCAGCACCAACGTCAGGACTAGTGCTACTACCACTGCCAG  
CATCAACG

AGCCTTGATGACATGAAGGACCATCCAATAATCGAGGAACACACAAGAAACGAGGCTTCACAAAACAATT  
CCACCTCTAGCCTGTGGAAGTTCTGGAAACGAGAACCTACGACTGCTGTAAACGGAACGCAAGCTGTTGAT  
AATAATAC

TATGGACTCGTACTCAATAACAAACGTAATAACCTGGATCCGACTGAATTGCATCGTTGGATGCAAGAAG  
GACACACTACTACGCTGAGGGAGCCTTTCCAGGTAGTGGATGTGCGAGGCTCAGATTATATGGGGGGCCAT  
ATCAAGGA

CTTAAACAATATCAAACCGATTGATCCAATGACTATTCTCGCTTGAAGAAGCCGGCTGGACTCCCAGAGA  
TGGATGCGTTGGCACAACGTCCCAAGCGTGGTCCACACGATGCAGCAATACAGAATATACTCACAGAGCTA  
CAAAATCA

TTCATACTCAGTTGCCATCCATGGCTTCTTTAGGTTACTTCAATCAGCCAAGTTCTACTTACTATGCTCCT  
CCTGCACCACTTCAACAGCACCAGCAACCACCTATCCTTCCCCCTCCGGGCCTAATGTACACTAGTAACAA  
TAACAGCA

ACTTCTGGTATCGTACGTGCTACGACGGTTGACATTTGGAAGGCATTGGTTCCAAATACTCCAAGAGCTGT  
GAAAGAGATCCTTCCAACATTGACTGGTATGATAGTCACTCACTTGGCTTCATCATCCAATGTATTACGCA  
ACATTGCT

TACCAATGCGACTACCAACTCCAGCACTAATGCTACTACCACTGCCAGCACCAACGTCAGGACTAGTGCTA  
CTACCACTGCCAGCATCAACGTCAGGACTAGTGCGACTACCACTGAAAGTACCAACTCCAGCACTAATGCT  
ACTACCAC

TAATTCTACAGCTATCACAGCAGATCTAGGTTTCATCCGAAGCAGAGAACCCTACTGCAGTTGAAGACAGGCT  
TAGCTGCCATAGTCTCTACTGTCATTGAGGAATTCACACTGTTTATGGATATCGCTGAGAGAATCGCCGTG  
TTACATCA

ATCCACAACCTCTATCTTTTACCGACGCAAACAGCAGTTCTGCTTCCGCTCCATTGGAAGTGGCAACGTCTA  
CGCCAACCCCATCTTCAAAGGCATCCTCTCTGTTGCTTACACCATCAACATCCTCTTTAAGTCAGGTTGCT  
ACAAATAC

AATGAGATCCAAGAATCCAATGATCTTAACATAGAATCTGACCATGACTTCCAATCCGACATTGAACTACA  
TCCTGAGCAACCGAGAAATGTCCTTTCAAAGCTGTGAGTCCAACCGATTCCACACCTCCGTCAACTCATA  
CTGAAGAT

GCACTGAGAAACGTACCTGTAGTGATTATGACCTGATCTGCCCCAACCTGGGTACCGTCATCCAGAACCAC  
ACCTTTGATGACCTTGTGGCCACATCCGGGGTCATACAAGATCAAGTCAGCAACTTTGTTCTGCAGCAGAG  
ACAAGTTG

TTGGGTGACCTGGTTTGGCTTGGATAGTCCATTGACAAAACCTGGATCCTACGAGCATAACCATTCACTCCAA  
TCATCTCTGTCCGGATCTGCCTCAATGCCGATGACCAAACCTGGCTGGTGTGATATCTCATCACTTGAGAG  
AAGTGAGG

GAATCCAACCTCAGAGGCAGTTGAAGCCGAAAAAAAAAGAAGAGGAAGCTCCCCAGCAACAACAATCAGAACA  
ACAGCCGGAGCAAGGAGAGGCAGTGCCGGAGCCTGTGGAAGAAGAGAGTTAACCACCTCATAGAAAGACAA  
ATAAAGAA

TGCCATCAGAGCTGGTATCATTATTGCCAAGTTGTCCGTTATCCCAATCAGAAGAGGTTACTGGGGTACCA  
ACTTGGGTCAACCACATTCTTTGGCCACCAAGACCCTGGTAAGTGTGGTTCCGTCACTGTTAGATTGATC  
CCAGCCCC

TCATGCACTGCTGTGGGTACGGCCCATTTCTGTGGAGGTGGTACTGAAGCAGGTTGAGGAGAGGCATGATGG  
GGGTTCTCTGGAACAGCTGATGAAGCAGGTGTTGTTGTCTGTTGAGAGTTAGCCTTAGTGGAAGCCTTATC  
ATATTCTT

GTTGGGGTGTATGGTTTCCACAGATCTGGTGAAACTGAAGACACTTTCATTGCTGACTTGGTCGTCGGT  
TTGAGAACTGGTCAAATCAAGACTGGTGTCTCCAGCTAGATCCGAAAGATTGGCTAAATTGAACCAATTGTT  
GAGAATCG

TCCGGCTATCCCTACTAAATCTGATGAAGCTGAAGCTGAAGTTGAGGCTGAAGCAGGTGATGCTGGAACAA  
AGATTGGACTTGAAGCTGAAATCGAAACTACAACCTGATGAAACTGATGATGGTACAAACACCGTTTCTCAC  
ATATTGAA

TACCGGAATTTGATAGAGATTCCACTAAGGTTAATTCTCAACAAGAGACAACACCTGGGACATCAGCTGTT  
CCAGAGAACCATCATCATGTCTCTCCTCAACCTGCTTCAGTACCACCTCCACAGAATGGACAGTACCAACA  
GCACGGCA

TTCAACAATGCTTCTCTAGGTTATGTTTCATGCCCTTGCTCATCAACTTGGTGGTTTCTACCACTTGCCTCA  
TGGTGTGTTGTAACGCTGTCTTGTTCCTCATGTTCAAGAGGCCAACATGCAATGTCCAAAGGCCAAGAAGA  
GATTAGGT

GAGTAGATGTAGCAGCAGAGCTGGAGGCTGGAGATGCGGCAGCAGAACTTGTGAGTTGTTCTCAGAAGAG  
GAAGCAGCAGCGGTAGCTACAGAAGCAGCAGACGATGTTGTACTGGTAGCGGCAGCTGGAGCGGAGTTGAC  
AACAGCAT

ATCTTCAGTATGAGTTGACGGAGGTGTGGAATCGGTTGGACTCACAGCTTTTGAAAGGACATTTCTCGGTT  
GCTCAGGATGTAGTTCAATGTCGGATTGGAAGTCATGGTCAGATTCTATGTTAAGATCATTGGATTCTTGG  
ATCTCATT

GACGATATTCCAACCACCAAGAAGCTTACTGGTACAGGCTGAAGTTTGATGCTTGGTTTCTCAAAGAC  
TGCGGCAGACACTGTCATGAGATGGATTCCAAAGGCCGATTGGGGTGTGCCGAAGATCCTTCAGGTAGAT  
ACGCCAAA

CTGTATTATACAATTCTATGCTATGTGAACTGTCTTTGAAAGTGACCTAGGCCACTTCGACAATTTTCATCT  
TCTTCGTCGTCATCTTCTTCTTCTTCACTCTCCTCCTTCTTCTTCTTCCGATTCTTTGATGGCATCTC  
TTCCACTG

TTCAATTTCAAGCCTTGTATGACATGAAGGACCATCCAATAATCGAGGAACACACAAGAAACGAGGCTTCA  
CAAAACAATTCCACCTCTAGCCTGTGGAAGTTCTGGAAACGAGAACCTACGACTGCTGTAAACGGAACGCA  
AGCTGTTG

CTTCTTCGTCGGAAGAAGAGTCAGAGGAAGAGGAAGAGGAATCCTTGGATTCTTCCTTCTTGGTTTCAGCT  
TCACTTTCGCTGTGAGAAGACGATGAAGAAGAGGATTGAGAATCAGAGGATGAAGATGAAGATGAAGATTG  
AGATTGAG

AAAATTTACTTATGTTTTACCTATATTAATCAAGTTATAAAGCCTTCTTGGCGGCATCAGCAGGGGAAACC  
TTGTTTTCTCTGTTGAATCTTGGTCTTTGAGGTGGAGCTCTGTTCTTTCTGTCTTCTCTGGATCTGACTCT  
GACAATTC

GCTGAAGCCGTTTTCAACTACGGTGACTTCACCACCATGTTGACTGGTATTGCCCCAGACCAAGTGACCAG  
AATGATCACCGGTGTTCCATGGTACTCCAGCAGATTAAGCCAGCCATCTCCAGTGCTCTATCCAAGGACG  
GTATCTAC

AATAACCAACTTCTTCGCCCAACTTGACATCCATTTCTCAGCAACTCTCTGTGCAACAGACATTGCTGCG  
ACACGACGAGGTTGAGTACATGCAACTTGAGTGTCTCTAAGTGTGGCATCTCATCGAATAAAACGAATTG  
AGGAATTT

TTCTCAAGTTTTAGACACACCGGTTTTCTTATAACAATTCAAGTTTCGTCGGTTTTCTCAAGTTTTAGACACGT  
CAGTACCTTCTACAAGTTCCAGATCGTCCGTTTTCTCAAGTCTCAGACACTCCGGTGCCTTCTACAAGTTCA  
AGGTCGTC

ATTGTTATTTCTGTATTATAACAATTCTATGCTATGTGAACTGTCCTTGAAAGTGACCTAGGCCACTTCGAC  
AATTTTCATCTTCTTCGTCGTCATCTTCTTCTTCTTCACTCTCCTCCTTCTTCTTCTTCCGCATTCTTTG  
ATGGCATC

TTAGTTAACTTAAGTTGATTTGCACGAGAGTTGGTTTTTGGGGGACATACTGTTGAGGTTGTTGGCCCTC  
AACGTCCACCATGGAAGTGTGTTGTTGAGTTGAATGAAACAACAGATTCTTGATCACTCATATTTGTTTTGT  
GTATTATT

TATAAAGTCTCTTAGTTTTGTCGCGAGGCATGTTGCATTTACCAACTGTCATAATCTCCCTGCCATCCTTC  
ACTCTGTTTTCTGATGAATTGATTCATTTCTTGTGGAACCTCGTGAATACGTGGTCCATTCAATGTGTATGG  
ATCACTGG

TCCTTCTTTGGCATAACGAATAGATTTAATATTGCTCTTGGCCTTCTCAGCCCCACTTTCAAGAAATTGCA  
GTTGTCTGACCTCATGGACATACCTGTGTGGCTCATCGTAACACCAACGGTTTTCATCCAAAGTTGTGATCC  
TTTCTTA

TAGCATGCGACCACCCAGTAATCATACTGCTGACGCTATTGGTCACGTGGTTATGGCAGCTGCTGTTGACT  
GCGGTGGCGTCCCCTTTCCACACCGTACGTGAGCACATGTCTGGATTGCTAGCTGCGTACATAGTGACAGG  
CCTTGTCT

ACTGAGGGGGAGCTGCAGCGTTAACAACGCCGAAAAGGCTGATATGGGGGATGGAGTTGCAGGAGCATCT  
GTCTGCATTGCATTCTGGGTCCCTAGTTGTGGCTGAAGTGGTTGAAGTTGAGGTTGCTGTTGAGGTTGCTG  
TTGAGGTT

ACTGAGGTGCGCGAAACCGAACAGTCAAACATTGATGAATCTGCAACAACCTCCGGCTATCCCTACTAAATC  
TGATGAAGCTGAAGCTGAAGTTGAGGCTGAAGCAGGTGATGCTGGAACAAAGATTGGACTTGAAGCTGAAA  
TCGAAACT

ATATGGAACCAGTTGGTGCAGGCCACTATCAGTTCGTAGTGAAGTCAAAGCTGCTTGTTCATATGCTGTG  
CAGCTTTCATCAGCTTACTCTTCTGCTGTCAAGGTTGAAATGACCTTATTGAAATAAATCTGTAATTTCTTG  
GATAAAAC

TAACCTAACGGAAGTATCATGCTCGAATGGTGAAAACATACCTGTAGAGTTGGAACCACCCCAACACATG  
CAACAACCTGCGTCAGGTAATTTACCATTGTTTCATGGCAGCAAACCTGTTCTTGGTTTCTTTACCAATGACA  
CTTTGGAA

AGTGATTATGACCTGATCTGCCCCAACCTGGGTACCGTCATCCAGAACCACACCTTTGATGACCTTGTGGC  
CACATCCGGGGTCATACAAGATCAAGTCAGCAACTTTGTTCTGCAGCAGAGACAAGTTGGGGTGTGCTTTT  
TTGTCGGA

AGCTGCCCCACTGCAAACAAGTGAATCAAGCAGTTTTTACCCTGCATCAGCAGCTCTACCAGTAAGTTCAA  
CAGACGTTGATGGCTCAAGCGCCTCACCTGTAGTGAGCATGAGCGCCGCAGGACAAATAGCTAGCTCAAGC  
AGCACAGA

AGTGCTACTACCACCGAAAGTACCGACTCCAACACTAGTGCTACTACCCTGCTAGCACCAACTCCAGCAC  
TAATGCCACTACCCTGCTAGCACCAACTCCAGCACTAATGCCACTACCCTGAAAGTACCAACGCTAGTG  
CCAAGGAG

GGATTGGGTGATCTTCTTCGACAGTCTTCAAGACGAATAATGGAGCACCCCTAACACAAACAATTCTTTCA  
CCTTCTGGAGATTTCGACAACGGCAGTAACCTTCTTGGAGACAGGGTCAAATGGATGGAATTCAAAACCTT  
GTACTTGG

CATCATTTAATGCCAATGTGTGCGAGCAAGCAAATTCAGCAGCAGCAGCAGCAGCAGCAGCAGCAGCAGCACAAGTCTCAA  
GACACAGGTCTCACGCCGCTGGAGATACAATCACAACAACAAAACTACGACAACAACAACCTACAACAACA  
GAAGTTTG

TTGCTCTTGGCCTTCTCACGCCCCACTTTCAAGAAATTCGAGTTGTCTGACCTCATGGACATACCTGTGTG  
GCTCATCGTAACACCAACGGTTTTCATCCAAAGTTGTGATCCTTTCTTATTATTAAGCTTGACAATATTTT  
TTCTCTGT

TGGTTTTCTACCCTTGCCTCATGGTGTGGTAACGCTGTCTTGTGGCCTCATGTTCAAGAGGCCAACATGC  
AATGTCCAAAGGCCAAGAAGAGATTAGGTGAAATGCTTTGCATTTCCGGTGCTTCTCAAGAAGATCCAGAA  
GAAACCAT

AAATTCCAAAGTGCAGGATATTTCTTCCAGACCCTAAATTCATTCCAAACAACCATACAGACAATTCAA  
CACATGGTGTGGTGAACCTGCAAGAATGATCATTGCAGGTGCCATTGGACAGGAAATCTCCGACAAGAAGT  
TGACTGAA

ATAGAATCTGACCATGACTTCCAATCCGACATTGAACTACATCCTGAGCAACCGAGAAATGTCCTTTCAA  
AGCTGTGAGTCCAACCGATTCCACACCTCCGTCAACTCATACTGAAGATTGAAACGTGTTTCTAAAACCA  
ATATTCGC

CCTTGAATAAGTGAACCGTAAAGGGTTATACAGCCTGAGCTTGGCGTTGCAGCCACCAGCCAGAAATGAT  
ACCGGAGCACAGACCAACTGTGACCATTTCTTCTCCGATCTGTAATCCAGAAGACACCACGTCATCCCAC  
CAGTAATG

GTTTACGTTTAGTTTCGGAAAGTTCAAGCTCTTTGATTTCTCTTCAATTTCAACATCCGTTTCGACTTCTT  
CAGTGTACGTTCCCTCCTCTTCAACTTCATCTCCACCTTCGTCTCATCCGAATTGACATCATCCTCGTAC  
TCATCATC

ATCAAAAGGTGCGTGACAGAGAATCCACTCAAACCACACTTAGTCTTGGAACCTCTGCCTGTAGCACCCCTC  
GTCTCTGATTTACCACCAGAACCTGTAGCAGCACCTGGGAAAGGAGACACGGCTGTTGGATGGTTGTGAG  
TTTTCGACT

TTGAAACAATTACTTTGGACCAGGAAGAGGCTAGCGCTGTTGCTAATCATGCGCACGACGATGAGGCTTCC  
ACAGACGTTGAAGGCTCCACAGACGTCAATGTCAATGAACAGGCTCTGTTGCAAGAGGATTTTGACATGTG  
GAGTGAGA

GAATCAGAGGATGAAGATGAAGATGAAGATTCAGATTCAGACTCAGACTCAGATTCAGATTCAGATTCAGATGAAGA  
TGAAGATGAGGATGAAGATTCGGAGGAAGAGGAAGAGACGGCCTTAGCTTTTTCTTTGGCTTGTTGG  
AAGCCTTA

TTTATTTTCGAATCTGATAGAATAACCAACTTCTTCGCCCAACTTGACATCCATTTCTCAGCAACTCTCT  
GTGCAACAGACATTGCTGCGACACGACGAGGTTGAGTACATGCAACTTGAGTGTCTCTAAGTGTGGCATC  
TCATCGAA

ACTACCACTGCCAGCATCAACGTCAGGACTAGTGCAGACTACCACTGAAAGTACCAACTCCAGCACTAATGC  
TACTACCACTGCCAGCACCAACGTCAGGACTAGTGCTACTACCACTGCCAGCATCAACGTCAGGACTAGTG  
CGACTACC

GCAACGAATTCATCATTTAATGCCAATGTGTGCGAGCAAGCAAATTCAGCAGCAGCAGCAGCAGCAGCAGCA  
CAAGTCTCAAGACACAGGTCTCACGCCGCTGGAGATACAATCACAACAACAAAACTACGACAACAACAAC  
TACAACAA

TCAGAGCCAAAGCGAGAGTCAAGGTCAAGTTTTCTTCCACCAATGAAGCTTCTCAGGATAGTTCCACCACCT  
CTTTGGTAACAGCCTATTCTCAAGGTGTTCAATTCGCACCAGTCTGCAACAATAGTGAGTGCCACAATCTCT  
TCCCTCCC

ACCAAAGACTTGACGGTTCTCAAAGCAGCAACGTGCTTTCTGCCACCGTTGTGAACAGCAACCTTGATCAA  
TTGGTTGTTGACCTTGGTGAAGGTAACATCAATGTGCTTCAAGTTCTTGGTCAAAGTACCTCTTGGACCAA  
CAACCTTG

ATCATCAATATCTCCTTCTCTTTCATCATCAACAATAATATCATCGTCATCATCACTGCCGACATTCCTG  
TGGCATCAACATCTTCGACAGTTGCCTCCTCCACACTTTCCACTAGCTCATCGTTGGTTATCTCTACGTCT  
TCGTCAAC

CAACGGAATCGACGACCGTTTTAGAACCATCAACGACTAACAGTTCAGTACGTTTAGTCTGGTCACTTCA  
AGTGACAACAATTGGTGGATTCCAAGTGAATCAGCAGGCACCAGAAGCTGCATCCACTGCATCTTC  
TACCGTTG

TTTGATTTCTCTTCAATTTCAACATCCGTTTTCGACTTCTTCAGTGTACGTTCCCTCCTCTTCAACTTCAT  
CTCCACCTTCGTCTCATCCGAATTGACATCATCCTCGTACTCATCATCCTCATCCTCATCCACCCTCTTT  
TCCTACTC

TCAACAAGTTTTGACCAATCTAGCGTTATCAGCAGTCTTCTTCTTGTCTCTTGCGGCCTTGTTCTTTCTTT  
AATGTAACGCTTGTGGTCTCTGTTAGAAGAGTCATCTGGGACATCTTCGTCCAAGAACTCAAAGGTTCTCC  
AGGAGTCA

TCACTTGGCTTCATCATCCAATGTATTACGCAACATTGCTGCTCAGACCTTAGGTGATCTTGTCCGTCGTG  
TAGGTGGTAATGCTTTGTCCCAACTGTTACCAAGTTTTGGAGGAATCTTTGATAGAAACATCAAACCTCAGAT  
TCGAGACA

TTAAGGTTCTCTTCGCATAGTCGGCAGCTTTCTTTTCGGACGTTGAACACTCAACAAACCTTATCTAGTGCC  
CAACCAGGTGTGCTTCTACGAGTCTTGCTCACTCAGACACACCTATCCCTATTGTTACGGCTATGGGGATG  
GCACACAA

AATATGGACACCATCGCCGGAGATTGGATCTGCTGCTTTCTGTCAACAAACCCAGTGCCTGCCCTGTTGA  
GCTCTCTTGCTGCAACTGCTGCTGACGATGTTGATTTACCATCGATTTCAATGAGATGCTGCTCAAAATAC  
TCTGTTTCG

TTAACATGAGAGGTATTAATCCACTGCTATGGTATTGTGTGGTTCTAACGACGACAAAGTTGAATTTGTC  
GAGCCACCAAAGGACTCTAAGGCCGGTGACAAGGTGTTCTTTGAAGGTTTCGGTGACGAAGCTCCAATGAA  
GCAATTGA



ACCGCTGGACTCGTATGGGGTATAAGTGATACCTCTGACACCAGAGGCAAAGCTGCTGACGTCTTCGCCGG  
AAGAAGTAGAGGAAGAAGCTTGGGAGGAAGAGGAAGATTGAGTAGATGTAGCAGCAGAGCTGGAGGCTGGA  
GATGCGGC

CAACCACCAAAGAAGCTTACTGGTACAGGCTGAAGTTTGATGCTTGGTTTCCTCAAAAGACTGCGGCAGAC  
ACTGTCATGAGATGGATTCCAAAGGCCGATTGGGGTTGTGCCGAAGATCCTTCAGGTAGATACGCCAAAAT  
ACACGAAA

TCTTCAATTTCAACATCCGTTTCGACTTCTTCAGTGTACGTTCCCTCCTCTTCAACTTCATCTCCACCTTC  
GTCCTCATCCGAATTGACATCATCTCGTACTCATCATCCTCATCCTCATCCACCCTCTTTTCTACTCCT  
CCTCATTT

CCAGACAATTGATTTCTAACGAAGGTGTCTTGGTGGGTGGTTCTTCCGGTCTGCCTTCACTGCGGTTGTG  
AAATACTGTGAAGACCACCCTGAACTGACTGAAGATGATGTCATTGTTGCCATATTCCCAGATTCCATCAG  
GTCGTACC

CACAGTCCAAGGAGTATTTCAAATTGTCACTTGAAGTGAAAACACCCAGTGCTTCTCGACATCAGAGGTA  
CCAGAGGTGTTGGCTTCCAATCTTCATCAAAGGCTTCAAAAACAATAACGTTAACACCCCAAGCTCTCAT  
GGAACAGA

TAAATCAGAGTCAGATTCGTTGGTATTTCTTTGGCCAACCAACAAGTCGTTCAAACCTTAAACTGAACTT  
GGTCTCTTCAACTGTACGGAAGCTCTGAGTTTGTGCTCTGAGACTTCCATTGTTGTTTGGATTTGCATTGTT  
CAATCCTT

AGACTATTCACGTACAGGGTCCTCAGACGACGAGGATAGTGGAGCTTATGACGAGTGGATTCCATCGTTCT  
GTTCCAGATTTGGTCACGAGTACTTCTGCCAAGTCCCACAGAGTTTATCGAGGATGATTTCAATATGACC  
TCGTTATC

GGTGGTAGTGGTTGTCGTAGTTGCAGTGTGACGAGTTGCTTTCAGTGGCCTCAGATGTGGTAGTAGAAGTAA  
CGTCCCCTTCATCTGATGAAGACGATGACGATGACGATGACGATGACGATGACGATGATGATGTAGAAGTG  
GACGAAGA

CAAGACCAAACATGTCCATCTGTATCTTCGGTGATGCTTTCGATGTTGACAGAGCTAAGTCTTGGCGTGTT  
GACGCTATGTCCGTGATGACTTGAAGAAGTTGAACAAGAACAAGAAGTTAATCAAGAAGTTGTCTAAGAA  
GTACAACG

CAGCCTGAGCTTGGCGTTGCAGCCACCAGCCAGAAATGATACCGGAGCACAGACCAACTGTGACCATTT  
CTTCTCCGATCTGTAATCCAGAAGACACCACGTATCCCACCAGTAATGGCACTGAGACATGTATTATGA  
ATGCATAA

CGCTCAGCAGTTTGAAGCAATATTGCTAATGAAATCAAAAGCATTCAAGGTCACGTGCCTGGGTTTGCAC  
CTAACCTTGCCATCATTCAAGTAGGCAACAGACCAGACTCAGCCACATATGTACGCATGAAGCGTAAGGCA  
GCTGAAGA

TTAGGTTGTTACTTGGCTTCTACTGGATTGACGTATCCAGCTTGGGGATTTAAACAAGCTGAAATCGTCTG  
CAAAGACTCCTGGAGTCGTAGGGACAAATCGACCTGGTGAATGTAGAAGATCACTGGAACCACAATTTAG  
AAACCGCA

AGGTATGGCTTTCAACAATGCTTCTCTAGGTTATGTTTCATGCCCTTGCTCATCAACTTGGTGGTTTCTACC  
ACTTGCCTCATGGTGTGTTGTAACGCTGTCTTGTGCTCATGTTCAAGAGGCCAACATGCAATGTCCAAAG  
GCCAAGAA

TGACCACCTTGGACTTCACAGACGAAGACTCTTCTTCTTGTGCGAGAAGCACTCTGTTTGTATGTCATCAGT  
GTAATTGACTAATGCGTTCAAACAGGTATCAACACCAAGTGAGTATTCAGTACCTGGAACGTTGTTAGAAA  
CAGTGGCT

ATCATCTCAGTACACTATATCATCCACTGGTATACTTTCTCAGGTTTCAGACACATCGGTGTCTTATACAA  
CTTCAAGTTTCGTCTGTTTCTCAAGTTTCAGACACACCAGTTTCTTATACAACCTTCAAGTTTCGTCTGTTTCT  
CAAGTTTC

ATGGCTTCTTTAGGTTACTTCAATCAGCCAAGTTCTACTTACTATGCTCCTCCTGCACCACTTCAACAGCA  
CCAGCAACCACCTATCCTTCCCCCTCCGGGCCTAATGTACACTAGTAACAATAACAGCAACGTTATTCTCCT  
CTCCTGTT

TGTCGCCGATGTGAATTTCTGCACTGAGAAACGTACCTGTAGTGATTATGACCTGATCTGCCCAACCTGG  
GTACCGTCATCCAGAACCACACCTTTGATGACCTTGTGGCCACATCCGGGGTCATACAAGATCAAGTCAGC  
AACTTTGT

TCGTACGTGCTACGACGGTTGACATTTGGAAGGCATTGGTTCCAAATACTCCAAGAGCTGTGAAAGAGATC  
CTTCCAACATTGACTGGTATGATAGTCACTCACTTGGCTTCATCATCCAATGTATTACGCAACATTGCTGC  
TCAGACCT

AAGCCTTTGCAGATTCCCTCCCTTGCCATTGAAGTTGCTAACACCTGTTTCCCTCCGATATAGACATCTCCAG  
AGCACAACAGCCAAAGCTTATCAACCAGCTTGTCAAGAATTGGGTATTTACTCTCATGAGTTGGAGCTGT  
ACGGACAT

GAGAGGTAAAGGAAGAGGCACATTCATTGCCTGGGATTTGCCTACTGGTGAGAAGAGAGACTTACTATTGA  
AGAAATTGAAGTTGAATGGTTGCAACGTTGGTGGATGTGCAGTCCATGCAGTGAGATTAAGACCTTCATTA  
ACATTGCGA

CTTCTCTAGGTTATGTTTCATGCCCTTGCTCATCAACTTGGTGGTTTCTACCACTTGCCTCATGGTGTGTTGT  
AACGCTGTCTTGGTTGCCTCATGTTCAAGAGGCCAACATGCAATGTCCAAAGGCCAAGAAGAGATTAGGTGA  
AATTGCTT

TTCTTCTTTTTCTTCTTCTTCTTCTTCTTCTTTCGTGCGGAAGAAGAGTCAGAGGAAGAGGAAGAGGAATCCTTGGATT  
CTTCTTCTTGGTTTTAGCTTTCATTTTCGCTGTGCAAGACGATGAAGAAGAGGATTCAGAATCAGAGGAT  
GAAGATGA

GAAATTGGTTGAGCCTTACCTAAAGTTTCAAGTAGTTGAGATACAGTTGGCATCTCAATATCGGAAGTGGA  
AGGTTCTGTCTCCTTCACTGTGTTCTCCTCTGTGGTATTACGGAATTTATTGTTTCGTGCTCACTTTTTAT  
TTACAGTT

CTGAACACCACGATTTGCATCATCACTACTTTTATTGGTAACTACGCTTCTCTTTTCAGATGGTGGGATTAC  
TGTCTAGACACTGAATCTGGTCCAGAAGCTAAGGCCTCCAGAGAAGAAAGAATGAAGAAGAGAGCTGAAAA  
CAATGCTC

TCAAGGCTGCTCAAGACTCTTTTCGCTGCCGGTTGGGGTGTGTTATGGTTTTCCACAGATCTGGTGAAACTGAA  
GACTTTTTATTGCTGACTTGGTTCGTGCGTTTTGAGAACTGGTCAAATCAAGACTGGTGTCCAGCTAGATC  
CGAAAGAT

AGAACGCATATAGTAGAGAGTAAATCAAACACACGTAGAAAACAAGTGGCAACTAGAACAGGTTTCAAGTACA  
GCGAAGTACAAAGGTCTCAACAGACAAGCCCTCATATTTCACTCATACTGACACCTTGCCTTCTCTGCTC  
AGTCATAA

CCTTCTTGGTTTTCTTCTTTTTCTTCTTCTTCTTCTTTCGTGCGGAAGAAGAGTCAGAGGAAGAGGAAGAGGAA  
TCCTTGGATTCTTCTTCTTGGTTTTAGCTTTCATTTTCGCTGTGCAAGACGATGAAGAAGAGGATTCAGA  
ATCAGAGG

CACCTTTGGCTGCTTCCGGGGTGTGCTGACAACATAGGCGGAACTATGCAGAATTCAGGCAGCAGAGGG  
ACGCTCGACGAGACTGTGCTGCAAACACTAAAGCGAGATGTGGTGGAGATTAATTCAGACTGAAACAAGT  
GGTATACC

TCTCCACCTTCGTCTCATCCGAATTGACATCATCCTCGTACTCATCATCCTCATCCTCATCCACCCTCTT  
TTCCTACTCCTCCTCATTTCATCATCCTCATCCTCATCATCCTCATCATCCTCATCCTCATCATCAT  
CATCATCA

GTTTGGGATGAGGACGTTGCTGGCATTGTGCGAGGGCCTTTGGTGGGGTCTTGATTGGTGCCCTTGCGCCAA  
GTTAGCTGCTGGTCTTGGTGGTTCGTGGCGGTTGAGATTGCAATCTCTCCTCTTCTTGATTACGTCTCTGT  
AGCTCGGC

AAGCTGTTGAGCGAGCTATTTTCGGGTATCCAGCCTTCTCTGCAGACCGCCCCAGTTGGCTTGGCTCTGGT  
GCTGTTTCGTTAGCATCACATCGCCTGTGACAGGCAGAGGTAATAACGGCTTAAGGTTCTCTTCGCATAGTC  
GGCAGCTT

ATCAAACCGATTGATCCAATGACTATTCTGGCTTGAAAGAAGCCGGCTGGACTCCCGAGATGGATGCGTT  
GGCACAACGTCCCAAGCGTGGTCCACACGATGCAGCAATACAGAATATACTCACAGAGCTACAAAATCATG  
CAGCAGCT

AAGGAATTTGGAACGTGCCCCGTTACTATTGTAATGGCATGCAGTTGCTGCCTTGTGGGTTGAGCGATAC  
AGTTGGGAAACACACCGTAAGGTTGACTGTCCAGTTGTCAGGACTTGTATCTTCCCAATCATCTAGAT  
TCCTGTGC

CCCTTGGTTGAAAAGTTCATTAATTTCACTGAAGGTTCTACCAGTTGTCTCAGGCAGATCGATGATGACCC  
AAGCTAAAGTGACTGCTGTGAAACCACCCAGTATAGACCAGTTTTGGCACCCAGTTCCAATCGCTCACG  
TTTAGCAT

GATAGAGCACTGGAGATGGCTGGCTTTAATCTGCTGGAGTACCATGGAACACCGGTGATCATTCTGGTCAC  
TTGGTCTGGGGCAATACCAGTCAACATGGTGGTGAAGTCACCGTAGTTGAAAACGGCTTCAGCAACTTCAA  
CTGGGTAG

GGACGCCAACCAAGAACAGGAGAAGAAGAGCCAATAAAAAAGTCAAGTGAAACGTCACCTGATTCTACTC  
CGGCCCATCTGCTCCTGCCTCCACAAATGCCCCACAAACAATAAAGAAACTTCTCCAGAGGAGAAGAAA  
ATAAGATC

TCGATATCGTCATCGTCAGAAGATTAGATGCAGCGTCATCGTAAGTCTTAGCAGGCTTTTTCTTGAGTTGG  
CTGATGAGCTGAAACAGAAGATGCTGAAGAGGATGATGAAGAGGATGATGTATCAGTCATATTGATATTGT  
TTGATAAT

CTGCAACAAGTGAATCAAGCAGTTTTACCCTGCATCAGCAGCTCTACCAGTAAGTTCAACAGACGTTGA  
TGGCTCAAGCGCCTCACCTGTAGTGAGCATGAGCGCCGAGGACAAATAGCTAGCTCAAGCAGCACAGATA  
ATCCAAT

TGTATGAACGTGAAAGAAATCGAGAGGGTTTTAGAAGTAGTTTAGGGTCATTTTTAGTACATTGGTTGGCC  
TGGCTTGAGTTGCAACCAGTGCCAAGCATCAGCGTTGGCCTCTCTCTTGTACATTGGTTGGCCTGGTCTCA  
AATTTAAC

ACTCACTAAGTTTCGTGTCTTGAAGCACTCGTATAAAGTCTCTTAGTTTCGTTCGGAGGCATGTTGCATTTCA  
CCAAGTGCATAATCTCCCTGCCATCCTTCACTCTGTTTCTGATGAATTGATTCAATTTCTTGATGGAAC  
GTGAATAC

ATATGACTGAAAATATCTACATAGATTGAGAAGCGTCCAAGGATGTTGACAACAAGTGTGTCCAGCCTGT  
GAAATGCTCAGCACCAGTACCATGACCATCTATCGGACTGTAATTTTCATAACAATAACCTTGTCTTCCC  
AACTTTG

ATCAACTTGGTGGTTTTCTACCACTTGCCTCATGGTGTGTTGTAACGCTGTCTTGTTCCTCATGTTCAAGAG  
GCCAATGCAATGTCCAAAGGCCAAGAAGAGATTAGGTGAAATTGCTTTGCATTTCCGGTGTCTTCAAGA  
AGATCCAG

ACTCTTAGACCCAAGTGTCTAGCTTCGCTAACAGTTTGGACGATATCGTCTCTTGGTGGATCCATACATGG  
CATAACACCCAAGATTTCCAGTGACCTTTCACCTCTCTTTCTAGCAACACCTAAAGCACGGAACCCTCTAG  
AAGCCAAT

CGGTACCTTGTCTGAATCCATCAAGGCTGCTCAAGACTCTTTCGCTGCCGGTTGGGGTGTATGGTTTTCC  
ACAGATCTGGTGAAACTGAAGACTTTCATTGCTGACTTGGTCGTCGGTTTGAGAACTGGTCAAATCAAG  
ACTGGTGC

AGTGCATTATTAATGAACAGTGCACCACCTCCGAGTAAAAGCAAACCTCCCAAGCCTGCAAATGCCCCCT  
TGGTGAAGGCACCTTGACCTCTGCCTCCGGTTTGCTGTACCTTGGACAATTGTTTTTGGAACGCCTTTGCGT  
ACCTTTGG

AGAGAAAGTTACAATGGATGGTTGACAAGGACTTGGTCGGAAATTGGGACGATCCAAGGTTCCEAACTGTC  
AGGGGTGTGAGAAGAAGAGGTATGACTGTGCGAAGGTTTGAGGAACCTCGTCTTATCCAAGTCCATCCAG  
AAATGTCA

GACAGCCTTAGCAGCACCGGTGGAGGATGGGATGATGTTACCGGAAGCGGTTCTACCACCTCTCCAGTCCT  
TGTGGGATGGACCGTCAACAGTCTTTTGAGTAGCAGTCAAAGAGTGGACAGTGGTCATCAAACCTTCTTCA  
ATACCGAA

GAGGCCGTGGTTGGGAACCTTGTAGGCGTATAAGAGTGTGAGTGAGCATATGTTTGGGATGAGGACGTTGCT  
GGCATTGTGCGAGGCCTTTGGTGGGGTCTTGATTGGTGCCCTTGCGCCAAGTTAGCTGCTGGTCTTGGTGG  
TCGTGGCG

GACGTAGAGGACGACGTAGGTGTATTGGTTGATTTCGGTGGACTCCTGAGAAGCAATTGAGGTACTCGTTTG  
TTGATTCAAAGTTGAAGTCGACGCTGCTTGGTAAGAATGATGCTGACTTTGAGTGTTGCCTTCAACATTGG  
CTTCACCG

TTTGATTCTTCTTCTTGGTTTTCTTCTTTTTCTTCTTCTTCTTCTTCTTTCGTCGGAAGAAGAGTCAGAGGAAGA  
GGAAGAGGAATCTTGGATTCTTCTTCTTGGTTTTGAGTTTTTCACTTTTCGCTGTGAGAAGACGATGAAGAAG  
AGGATTCA

CGACGCTTGTGTTGTTGAAGGTCAACCAAATCGGTACCTTGTCTGAATCCATCAAGGCTGCTCAAGACTCTT  
TCGCTGCCGGTTGGGGTGTATGGTTTTCCACAGATCTGGTGAAACTGAAGACTTTCATTGCTGACTTG  
GTCGTCGG

AGCAAGCCAAGGATAATGGTGTGATATATTTAGAGTCTTGGATGCCTTAAATGACTTGGAACAATTGAAG  
GTCGGTGTAGATGCTGTGAAGAAGGCAGGTGGTGTGTAGAAGCCACTGTTTGTCTCTGGGGATATGCT  
TCAGCCAG

TAATGTCTGCTCCAGAAGCTCAACAACAAAAGAGAGGTGGTTTTCGGTGGCCGTAACAGAGGCGTCCAAC  
AGAAGAGGACCAAGAAACACTGAAGAAAAGGGATGGGTTCCAGTTACCAAACACTAGGTAGATTAGTCAAGGC  
TGGTAAGA

TCTAGCTTGACGCTGGACCAGATTACAGGCCTAATTGAAGTCAACGAAAAGGAATTGGATGCAACTACCAA  
GGCAAAGACAGAAGACTTTCGTCAAGGCATTCCAGGCTTCGACAAGGAAAGTACAGGCAAGGTATCCGTTG  
GTGACTTA

GTTGCCATCCATGGCTTCTTTAGGTTACTTCAATCAGCCAAGTTCTACTTACTATGCTCCTCCTGCAACCAC  
TTCAACAGCACCAGCAACCACCTATCCTTCCCCTCCGGCCTAATGTACTACTAGTAAACAATAACAGCAAC  
GTTATTCC

ACCGTCCTTGGATAGAGCACTGGAGATGGCTGGCTTTAATCTGCTGGAGTACCATGGAACACCGGTGATCA  
TTCTGGTCACTTGGTCTGGGGCAATACCAGTCAACATGGTGGTGAAGTACCGTAGTTGAAAACGGCTTCA  
GCAACTTC

ACCAGTGATTAACCAGTGAAAGAAGCGATGTAACCAGAGTGACCACCTTGGACTTCACAGACGAAGACTC  
TTCTTCTTGTGCGCAGAAGCACTCTGTTTGATGTCATCAGTGTAATTGACTAATGCGTTCAAACAGGTATCA  
ACACCAAG

CAAGGGCTTCTGAGACCATGAGGAACTCGCTACTTTACAAGATGTCCTACAAAGATTTCCCACAATTATTC  
AATGGTGGCCAAGCCACTGACAGAGTGCGTCAACAAATGATCACACCATTAGACGTCCCACCATTAGACTA  
CTTCGACG

CATGTTGTCAACCAAAGACTTGACGGTTCTCAAAGCAGCAACGTGCTTTCTGCCACC GTTGTGAACAGCAA  
CCTTGATCAATTGGTTGTTGACCTTGGTGAAGGTAACATCAATGTGCTTCAAGTTCTTGGTCAAAGTACCT  
CTTGGACC

AATTCTGGCAAGACCTTACCGACAGCCTTAGCAGCACCGGTGGAGGATGGGATGATGTTACCGGAAGCGGT  
TCTACCACCTCTCCAGTCTTGTGGGATGGACCGTCAACAGTCTTTTGGAGTAGCAGTCAAAGAGTGGACAG  
TGGTCATC

CACTATCCGTTGCCACAGTATATCCCACCACTGAGTACTTCCCTCACCTGATCCAATCGATTCACAGAATCA  
ACACTCTGAAGTACCTCAAGCTGAGACAAAGGTGAGAAATAACGTCTTACCACCACACACTTTAACATCAG  
AAGAAAAC

CCTGTGCAAGAAGGCCGAAGAAGAAGAAAGTGAAAGTGAAAGTGAAAGTGAAGATCAAGTTGAGGAGGAAGA  
TCAAGAAGTTGTTGCTGGAGAAGAAGATGATGACGATGACGAAGAGCTACAAGCTCAAAAAGAGCTTGAAT  
TGGAAGCA

ATTGCCTAAGGCTTTGGGTATCAAACCACAAATTTATGCTAAGCTGGAACTATAACAATCCAGGTGGTTCCA  
TCAAAGACAGAATTGCCAAGTCTATGGTGGGAAGAAGCTGAAGCTTCCGGTAGAATTCATCCTTCCAGATCT  
ACTCTGAT

TGAAGAGATACCCAATTGTCTCCATCGAAGATCCATTTGCTGAAGATGACTGGGAAGCTTGGTCTCACTTC  
TTCAAGACCGCTGGTATTCAAATTGTTGCTGATGACTTGACTGTCACCAACCCAAAGAGAATTGCTACCGC  
TATCGAAA

TTGACTTTGAGCCTTGTTAGTAGCTTCTTGTGTTGGTATACGGAACCCAGAAGCATCAACCTCACTCAACT  
TGAAAGATTCTAACCAAACCTTCTCTCAAGGAATCTTGGGAAGTCCCTGAAGATAGTAAGCTATTTTACCA  
TGTTTTGAA

TTGGTCCATTCTTTCCCTTGGTTCTCTTTATCTTTAATGTTTGGGTCAAGGTCTTTGACCACTTTGCCACAT  
AACTGAGCATAATTGAAGACCAATGAGGTTTATCACAAGCCTTGTGGAAAATTTGTTCAATAACTATTTT  
CAATGTTT

AAGAATCCAATGATCTTAACATAGAATCTGACCATGACTTCCAATCCGACATTGAACTACATCCTGAGCAA  
CCGAGAAATGTCCTTTCAAAGCTGTGAGTCCAACCGATTCCACACCTCCGTCAACTCATACTGAAGATTC  
GAAACGTG

GGCCTCGGTGGAGGCCGTGGTTGGGAACCTTGTAGGCGTATAAGAGTGTGAGTGAGCATATGTTTGGGATGA  
GGACGTTGCTGGCATTGTGCGAGGGCCTTTGGTGGGGTCTTGATTGGTGCCCTTGCGCCAAGTTAGCTGCTG  
GTCTTGGT

GCCCTTGCAACTAGAGGCTTTCCAACAAGGATTCTAAACTCCCCTCCACAGACCCCATCAAGTCGAACTGG  
TTCAAAGTTATGACCAAAGGTGGCTCCAACGACGCTTCGAGCACTAAGGTGGAAGAGGAATTCAATGAAT  
TTCAATCC

GCACTTATAGTGTATGATATAAGCAAATCAAGTTCATACGAAAATTGCAACCACTGGCTTACCGAACTGAG  
AGAGAACGCAGATGACAACGTGGCTGTTGGGTTGATAGGGAACAAATCAGATCTGGCTCATTTAAGAGCAG  
TACCAACC

GACAGCTCTTTCAACAAGTTTGACCAATCTAGCGTTATCAGCAGTCTTCTTCTTGTCTCTTGCGGCCTTGT  
TCTTTCTTTCAATGTAACGCTTGTGGTCTCTGTTAGAAGAGTCATCTGGGACATCTTCGTCCAAGAACTCA  
AAGTTCT

GGCGGACCTGCTGGGAACGGTCGTCATAGAAATATCCCAAGCAAATGAAGTCGACGAGTCTGTCTGGCT  
GCTCCATTGAGTTCATCCAGCAAAGCTGTTTCCAACAAGATCCTATCAATAAATGACTGGTTAAGGTCAT  
CCTATCCC

ACGTTGCAACAGGATTTGATTGAGGATATGAGCAAACCTTGTGGCAGTTTGAAGCAAGGAGCTGTGGCATT  
TCAATCAGCACTTGATGAAGATAAGCAAGTTCTTGGAGCTGCAGAGATAGGTATTCAAGTTGCTTCTCAAG  
GTTTAATG

ACTCATAAGCTGGGTATGAAATTCATCACCGATTTGGTTATCAACCACTGTTCTACAGAACACGAATGGTT  
CAAAGAGAGCAGATCCTCGAAGACCAATCCGAAGCGTGACTGGTTCTTCTGGAGACCTCCTAAGGGTTATG  
ACGCCGAA

GAGCTTATCAAACCTGTTAAGAGTTGCCATAATAAACCTTCAAGTGTGGTGGTGGATGACAGGATTGTGGA  
TGCGGCAACCAAAGATCTCTACGTGAATGGGTTCCAAGAAGAGATTCAAGTATCAGAATCCTACACCGGAGA  
ACTTGCAA

CTGAAACAGCACCAGTGATTAACCAGTGAAAGAAGCGATGTAACCAGAGTGACCACCTTGGACTTCACAG  
ACGAAGACTCTTCTTCTTGTGCGAGAAGCACTCTGTTTGATGTCATCAGTGTAATTGACTAATGCGTTCAA  
ACAGGTAT

GTGATTGCTTCTCCTGCGTTCGGTGACTTGGATCTGTGTGGTTCAGACTTGATCAGGCAATCAGCGAAC  
AAATGTCTCGAATTATGGTCCACCCCTACTTCCATCAACGACGTCGCCTTCTTGGTCATCAACTACTTGAA  
TGAAACT

TGATCTTAACATAGAATCTGACCATGACTTCCAATCCGACATTGAACTACATCCTGAGCAACCGAGAAATG  
TCCTTTCAAAGCTGTGAGTCCAACCGATTCCACACCTCCGTCAACTCATACTGAAGATTGAAACGTGTT  
TCTAAAC

TAGGATATGAAACTACGAAATCAGTCGATAGGCAAATTGAGGACCAGGACACGTTGCAACAGGATTTGATT  
CAGGATATGAGCAAACCTTGTGGCAGTTTGAAGCAAGGAGCTGTGGCATTTCATCAGCACTTGATGAAGA  
TAAGCAAG

AGGTGTATGTTGAATAGGGTCTTTATCTTTATGGTCTTTTGCGAACGAAATATGTCTGGAAGGGTGCCAA  
TCTCTGGTGACCACAATCCTGTGCCAGTCTCTATCAGCATCTTGCATCAAATCCGAGATAGGATTGATTAA  
TTCCTCAC

AGCGTTATCAGCAGTCTTCTTCTTGTCTCTTGCGGCCTTGTCTTTCTTTCAATGTAACGCTTGTGGTCTC  
TGTTAGAAGAGTCATCTGGGACATCTTCGTCCAAGAACTCAAAGGTTCTCCAGGAGTCAAATCTGTGCCAG  
AAAGCATA

AGCTAATGCTACTACCCTGCCAGCACCAACGTCAGGACTAGTGCTACTACCCTGCCAGCATCAACGT  
CAGGACTAGTGCGACTACCCTGAAAGTACCAACTCCAACACTAGTGCTACTACCACCGAAAGTACCGACT  
CCAACACT

TGACAGAACTCAACCATGGTCCATCATGCCAGATTTGTACTTCTACAGAGACCCTGAAGAAGTTGAACAAC  
AAGTTGCTGAAGAAGCTACCACCGAAGAAGCTGGTGAAGAAGAAGCCAAGGAAGAGGTTACCGAAGAGCAA  
GCTGAAGC

GATCTCCTTACTAGCAGAAGCCTTCCCTACCATCTATCTGCCCTTACCGAGCTTGCTACTGTGGCTGCTGC  
GAACATTCTCCTCAGCAGAGTTCTTCTCAATATGGACACCATCGCCGGAGATTGGATCTGCTGCTTTCTG  
TCAACAAA

AGTAGAGGACGACGTAGAGGACGACGTAGGTGTATTGGTTGATTCCGGTGGACTCCTGAGAAGCAATTGAGG  
TACTCGTTTTGTTGATTCAAAGTTGAAGTCGCAGCTGCTTGGTAAGAATGATGCTGACTTTGAGTGTTCCT  
TCAACATT

CTGGAAGCAGCCAAACAAGCAGTCAACATCAAGTCGTCTGGAGAAACACCTTCAACAGTGTATGGTTCGTG  
CAAGGACAACCTTGTCTTGGTCAAAGTACCGTTTTGTGCGGAACACAAGATTTGACACCAGCCAAGGATT  
CAATAGCA

CTAATTGAAGTCAACGAAAAGGAATTGGATGCAACTACCAAGGCAAAGACAGAAGACTTCGTCAAGGCATT  
CCAGGTCTTCGACAAGGAAAGTACAGGCAAGGTATCCGTTGGTGACTTAAGGTACATGCTAACTGGCTTGG  
GTGAAAAG

GTTGACAAGGACTTGGTCGGAAATTGGGACGATCCAAGGTTCCCAACTGTCAGGGGTGTGAGAAGAAGAGG  
TATGACTGTGCAAGGTTTGGAGAACTTCGTCTTATCCAAGGTCCATCCAGAAATGTCATTAACCTGGAAT  
GGAACCTG

ACTACCACCGAAAGTACCGACTCCAACACTAGTGCTACTACCACCGAAAGTACCGACTCCAACACTAGTGC  
TACTACCCTGCTAGCACCAACTCCAGCACTAATGCCACTACCCTGCTAGCACCAACTCCAGCACTAATG  
CCACTACC

CCAACTGTCCAAGACCAAACATGTCCATCTGTATCTTCGGTGATGCTTTTCGATGTTGACAGAGCTAAGTC  
TTGCGGTGTTGACGCTATGTCCGTGATGACTTGAAGAAGTTGAACAAGAACAAGAAGTTAATCAAGAAGT  
TGTCTAAG

CCGACGCAAACAGCAGTTCTGCTTCCGCTCCATTGGAAGTGGCAACGTCTACGCCAACCCCATCTTCAAAG  
GCATCCTCTCTGTTGCTTACACCATCAACATCCTCTTTAAGTCAGGTTGCTACAAATACTAATGTACAGAC  
GAGTTTAA

TATAAGTGATACCTCTGACACCAGAGGCAAAGCTGCTGACGTCTTCGCCGGAAGAAGTACAGGAAGAAGCT  
TGGGAGGAAGAGGAAGATTGAGTAGATGTAGCAGCAGAGCTGGAGGCTGGAGATGCGGCAGCAGAACTTG  
TGAGTTGT

TTGGCGTTGACGCCACCAGCCAGAAATGATACCGGAGCACAGACCAACTGTCGACCATTTCTTCTCCGAT  
CTGTAATCCAGAAGACACCACGTATCCACCAGTAATGGCACTGAGACATGTATTCATGAATGCATAAAC  
TGACCTCA

GGTTTTAGAAACACGTTTTCGAATCTTCAGTATGAGTTGACGGAGGTGTGGAATCGGTTGGACTCACAGCTT  
TTGAAAGGACATTTCTCGGTTGCTCAGGATGTAGTTCAATGTCCGATTGGAAGTCATGGTCAGATTCTATG  
TTAAGATC

GTTTTAGAAACACGTTTTCGAATCTTCAGTATGAGTTGACGGAGGTGTGGAATCGGTTGGACTCACAGCTTT  
TGAAAGGACATTTCTCGGTTGCTCAGGATGTAGTTCAATGTCCGATTGGAAGTCATGGTCAGATTCTATGT  
TAAGATCA

TCACTCATTGTCCGGTGTAGACTATAAATCACTGGATGCAACTTGTCAATAACTTTCAACAACCTTCTCAGC  
ATTTGCAAAGCTGATTTCTTTGTTCTTTGGCAGTGTCAAAGCTGCGACATCATCAGGCCTGAGCTTGTAT  
CATGTCTT

CCTTCTACCATCTATCTGCCCTTACCGAGCTTGCTACTGTGGCTGCTGCGAACATTTCTCCTCAGCAGAG  
TTCTTCTCAATATGGACACCATCGCCGAGATTGGATCTGCTGCTTTCTGTCAACAAACCCAGTGCCTGC  
CCCTGTTG

AAATCTTGGCTTTCTTTTTCATTGACAACAATACGACTTCTTTGATCTGAAACATTTGTATAGGAGGTGG  
AGGTGGGAAGGAAATCGGTTGTCCAAACCCATGTGGTGTGGTGGCGGAATAGACATTCATTTCATATTAG  
GGTAAGGC

TCTGAATCCATCAAGGCTGCTCAAGACTCTTTTCGCTGCCGGTTGGGGTGTATGGTTTTCCACAGATCTGG  
TGAAACTGAAGACTTTTCATTGCTGACTTGGTCGTCGGTTTTGAGAACTGGTCAAATCAAGACTGGTGCTC  
CAGCTAGA

TCAAACCACAAATTTATGCTAAGCTGGAACATAACAATCCAGGTGGTTCCATCAAAGACAGAATTGCCAAG  
TCTATGGTGGAAGAAGCTGAAGCTTCCGGTAGAATTCATCCTTCCAGATCTACTCTGATCGAACCTACTTC  
TGGTAACA

ACACCTGGGACATCAGCTGTTCCAGAGAACCATCATCATGTCTCTCCTCAACCTGCTTCCAGTACCACCTCC  
ACAGAATGGACAGTACCAACAGCACGGCATGATGACCCCAAACAAGCTATGGCCTCTAACTGGGCACATT  
ACCAACAA

CTTACCTTGCAATTCTGGCAAGACCTTACCGACAGCCTTAGCAGCACCGGTGGAGGATGGGATGATGTTAC  
CGGAAGCGGTTCTACCACCTCTCCAGTCTTGTGGGATGGACCGTCAACAGTCTTTTGGAGTAGCAGTCAA  
GAGTGGAC

CGAATTGACATCATCCTCGTACTCATCATCCTCATCCTCATCCACCCTCTTTTCTACTCCTCCTCATTTT  
CATCATCCTCATCCTCATCATCCTCATCATCCTCATCATCATCATCATCATCATCATCATCATCATAT  
TTCACCCT

TTATTGGTAACTACGCTTCCCTCTTTTCAGATGGTGGGATTACTGTCTAGACACTGAATCTGGTCCAGAAGCT  
AAGGCCTCCAGAGAAGAAAGAATGAAGAAGAGAGCTGAAAACAATGCTCAAAGAAGACTAACTAAGAGAA  
GAAACATA

GTAGGCGTCCTTAGGAAAGATAGTTTGATTGATACCGAAGGCAGACGTGCCGGTCTCGGAAATGATAACAT  
CACCTTCTTGCAAGAATTTGGACAATTCGTTCCACAACCCTCTTGTTCGTTCAAGGGCGTGCTAGCAGGTACA  
CCTTTGTT

TGGCAGGAACCCCTTGGTTGAAAAGTTTATTAATTTCACTGAAGGTTCTACCAGTTGTCTCAGGCAGATCG  
ATGATGACCCAAGCTAAAGTGACTGCTGTGAAACCACCCAGTATAGACCAGTTTTGGCACCCAGTTCCA  
ATCGCTCA

TTAATGGCAGACTGTGTCTTTGTACATATCCCTTGATTGGCACAGTGAAAGATCTTCTCAAAGTGTACTGG  
ATATGACTCAGTCTTGTGCGATCCTTGGCCAACCTTTGAGCACTAAGAGCATCCTTCCGTCGTTTAGTCAA  
CTGAGAAA

AAGAAGCGATGTAACCAGAGTGACCACCTTGGACTTCACAGACGAAGACTCTTCTTCTTGTGCGAGAAGCA  
CTCTGTTTGTATGTCATCAGTGTAATTGACTAATGCGTTCAAACAGGTATCAACACCAAGTGAGTATTCAGT  
ACCTGGAA

AATTCAAAGACTTAAACAATATCAAACCGATTGATCCAATGACTATTCCTGGCTTGAAAAGAAGCCGGCTGG  
ACTCCCGAGATGGATGCGTTGGCACAAACGTCCCAAGCGTGGTCCACACGATGCAGCAATACAGAATATACT  
CACAGAGC

ACAGTCTTCAAGACGAATAATGGAGCACCTTAAACACAAACAATTCTTTACCTTCTGGAGATTGACAAC  
GGCAGTAACCTTCTTGGAGACAGGGTCAAATGGATGGAATTCAAAACCTTGTACTTGGTCAAAGCGTCT  
TAGCCTTT

AGGACGTTGCTGGCATTGTGCGAGGGCCTTTGGTGGGGTCTTGATTGGTGGCCTTGGCGCAAGTTAGCTGCT  
GGTCTTGGTGGTGTGCGGGTGGAGATTGCAATCTCTCCTTCTCCTTGGATTACGTCTCGTAGCTCGGCAG  
TTCATCAT

ATCCCAATCAGAAGAGGTTACTGGGGTACCAACTTGGGTCAACCACATTCTTTGGCCACCAAGACCACTGG  
TAAGTGTGGTTCCGTCAGTGTAGATTGATCCCAGCCCCAAGAGGTTCTGGTATCGTCGCTTCTCCAGCTG  
TCAAAAAG



AGAGGATTCAGAATCAGAGGATGAAGATGAAGATGAAGATTCAGATTCAGACTCAGACTCAGATTCAGATT  
CAGATGAAGATGAAGATGAGGATGAAGATTCGGAGGAAGAGGAAGAGACGGCCTTAGCTTTTTCTTTG  
GCTTGT

AGCTCCGCTAATGCCGACAATTCGACTTCCAATCTCCGTTTGCTGTCTTGTCTGATGATGAAACGTCCCA  
ACATTTACCACCTACCTAATCTCTCCAGCTGAACATCCAACAATTTGTACTTTCACACCAGAAAAGGGT  
GTAAACCG

GGGTCAAATATGCCTGTGAAACGTGTATCAGGGGTACAGGGCGGCAGTGTACTCACACTGATGGTCCG  
CTACAGATGATCAGACGCAAGGGAAGACCATCGACCACATGTGGCCATTGTAAAGAGCTGAGAAGAACCA  
GAACTTCA

TGAAGAACAATAGCTAGTTTTACAAATTTTCATCATCTTAACCCTCTCTGGATCCTGGAAGAACACGTTTAC  
TTCTGGGCTGTTTCCACAACACTCAGGCCGTCTTCAACACTTTGATATTTTGCATTACTAAAGAAAGTT  
CCATAAAT

CGTGTTCACCAAGTCGACAACCTCTGGTAGAGTAACCGTATTCGTTGTCGTACCAGGAGACCAACTTGACG  
AACTTTGGAGACAATTGGATACCAGCGGAAGCATCGAAGATGGAAGAGTGAGAGTCACCCAAGAAGTCAGA  
GGAGACAA

TCCAACCTGCTCCTGTGCGAAGAAGGCGAAGAAGAAGAAAGTGAAAGTGAAAGTGAAAGTGAAGATCAAGTTG  
AGGAGGAAGATCAAGAAGTTGTTGCTGGAGAAGAAGATGATGACGATGACGAAGAGCTACAAGCTCAAAA  
GAGCTTGA

GTGGAAGCGCTCGAGAAAGTTGGAGTTTTTTCAGCGTTTTCGTTCCATGACGAGCGCTGGACTGCAGGGTCC  
GCAGTACGTCAAGCTGCAGTTTAGCAGGCATCATCGACAGTTGAGGAGCAGATATGAATTAAGTCTAGGAA  
TGCCTTG

CTACAAGTTCCAGATCGTCCGTTTTCTCAAGTCTCAGACACTCCGGTGCCTTCTACAAGTTCAAGGTCGTCC  
GTTTTCTCAAACATCTAGCTCACTACAGCCCACTACATCCTCCCAACGTTTTACCATTTCCACTCATGG  
AGCGCTTT

CAAACAGTGGTTGAAACAATTACTTTGGACCAGGAAGAGGCTAGCGCTGTTGCTAATCATGCGCACGACGA  
TGAGGCTTCCACAGACGTTGAAGGCTCCACAGACGTCAATGTCAATGAACAGGCTCTGTTGCAAGAGGATT  
TTGACATG

ACGACGTAGGTGTATTGGTTGATTCCGGTGGACTCCTGAGAAGCAATTGAGGTACTCGTTTTGTTGATTCAAA  
GTTGAAGTCGCAGCTGCTTGGTAAGAATGATGCTGACTTTGAGTGTTCCTTCAACATTGGCTTCCACGAC  
ACCACTCA

GCCCTTGCTCATCAACTTGGTGGTTTTCTACCACTTGCCTCATGGTGTGTTGTAACGCTGTCTTGTTCCTCA  
TGTTCAAGAGGCCAACATGCAATGTCCAAAGGCCAAGAAGAGATTAGGTGAAATTGCTTTGCATTTCCGGT  
CTTCTCAA

CTGGGTCAACGACGTAGACAATAACCATCAATTGTTAAAGAAGTTTTAGCGATGTTCTGTTGAGATAAACA  
TTCTGCCTGGTCTACCATATGTGACTCTGGAGCAGGCTCGAATATTCTTTGTTGTTGATGCGGTGGTAA  
TGAACCAT

TTACCACAACCTGAAGTCTTTGACCAAGAAGAGATACGGTGCTTCTGCCGGTAACGTCGGTGACGAAGGTG  
GTGTTGCTCCAAACATTCAAACTGCTGAAGAAGCTTTGGACTTGATTGTTGACGCTATCAAGGCTGCTGGT  
CACGACGG

CATTTTCGTCAAGCAAGCCAAGGATAATGGTGTGATATATTTAGAGTCTTTGATGCCTTAAATGACTTGG  
ACAATTGAAGGTCCGGTGTAGATGCTGTGAAGAAGGCAGGTGGTGTGTAGAAGCCACTGTTTGTCTCTG  
GGGATATG

GCATACGAATAGATTTAATATTGCTCTTGGCCTTCTCACGCCCCACTTTCAAGAAATTCGAGTTGTCTGAC  
CTCATGGACATACCTGTGTGGCTCATCGTAACACCAACGGTTTTATCCAAAGTTGTGATCCTTTCTTATT  
ATTAAGCT

ATGAAGCCAGTAAATATCCCACACTTTAAAGAAGTCATTATCATGTGACGGTCTGCGATCATTGTGGTTA  
TAAGTCTAATGAGGTGAAGACCGGTGGTGCCATCCCTGACAAAGGAAGAAGGATTACTTTTATACTGTGACG  
ATGCAGCT

GATGTAGAAATACCGAACCAGGAATTAGTCAAACCGAATCCAACACCAAGAATTGACCACAACGAAAATGA  
CTTTCTTAGATGAACTTACCATCTGCTGCTACAGCACCTTGGCTATCCATATCATCCAATGGCTTTATTT  
CCTCCTCA

CGTTGCAGTTGAGGCACCTTTTGAGGACATTTCTCCTAACCGTAGACTGCACACCCAAATGCCTGAAGTCT  
CATCAGGTTCCCATACCATCAATGAAGTATCAGCAGTAGCAGCTAGTAGTTGTAAGCGACTTTTCGTGCCAC  
TGAAGGGA

AGTTAGCTGGTGTGTTGACCAGCGTGTGAATGCTTCTCTACGGAAATAGAACCTCTGATGAAAATCAATT  
TGTTCTGTTCCACCAATTTGACAGAGGAGTGTGTTGCCACTCCTGCCTATGAACAGATAACAGATTCTGT  
GAATTCAA

ATTTGTGCAAGATAAACGATTCAATTGCTCTAGAGGTATCTGATAATGATGACGATTGTGACACTGATTTGA  
CTGCTGACACAGCTGACGAGCTGGAAAGCTCTGCTATCTTAAAGATGAGGGAGTCTGATGCATCTTTAAAT  
GTTACCAC

CGTTTCTCGAAGACTGCGCACAATACTTACAGTCCTCAGAACAACCACCAGATTTGATGTTTCAATCAATGTG  
CACAATTGCACTTTGGTTGGATCGTGCCACTTTCTGTGCTGCAATTGTGCTGCATGAGTAAGTTTCGAGCAG  
TGGGGTAT

AGACACACCGGTTTTCTTATACAACCTTCAAGTTCGTCTGTTTTCTCAAGTTTCAGACACACCAGTTTTCTTATA  
CAACTTCAAGTTCATCTGTTTTCTCAAGTTTCAGACACACCGTTTTCTTATACAACCTTCAAGTTCGTCCGTT  
TCTCAAGT

TATTAGAAGTTTTATTTTGAATCTGATAGAATAACCAACTTCTTCGCCAACTTGACATCCATTTCTCTCA  
GCAACTCTCTGTGCAACAGACATTGCTGCGACACGACGAGGTTGAGTACATGCAACTTGAGTGTCTCTAA  
GTGTGGCA

TGACCAATCTAGCGTTATCAGCAGTCTTCTTCTGTCTCTTGGCGCCTTGTTCTTTCTTTCAATGTAACGC  
TTGTGGTCTCTGTTAGAAGAGTCATCTGGGACATCTTCGTCCAAGAACTCAAAGGTTCTCCAGGAGTCAAA  
TCTGTGCC

GGATAAATTCGAGCTCCACTTCGAACCTCGTGGGGAGAGGATTTTGATCCGAGGAAGGTGTCGCTGGTGCG  
TTTTCCATTAGTGCTTGACATCCTGGGTGGAGCTTGGGGGAACCTTTGCCGTTTATGAGTGCTATAAGTTTT  
GGCTTACT

AAATGCAAGATTTAAAGTAAATTCACTTAAGCCTTGGCAACGTGTTCAACCAAGTCGACAACCTCTGGTAGA  
GTAACCGTATTCGTTGTCGTACCAGGAGACCAACTTGACGAACCTTTGGAGACAATTGGATAACCAGCGGAAG  
CATCGAAG

GCTACAGTCTACTACTTTGGATAGCTCAAGTTTAGCTAGCTCCTCTGCGTCGAGTTCAGACCTTACAGATT  
ATGGCGTCTCCAGTACAGCAAGCATAACCGCTGTTGTCAGCCTCAGAACAAGCAAGTACTTCCAGCAGTTTT  
AGCGTTGT

ATTCATCACCGATTTGGTTATCAACCACTGTTCTACAGAACACGAATGGTTCAAAGAGAGCAGATCCTCGA  
AGACCAATCCGAAGCGTGACTGGTTCTTCTGGAGACCTCCTAAGGGTTATGACGCCGAAGGCAAGCCAATT  
CCTCCAAA

TCTCCTTCTCTTCATCATCAACAATAATATCATCGTCATCATCACTGCCGACATTCCTGTGGCATCAAC  
ATCTTCGACAGTTGCCTCCTCCACACTTCCACTAGCTCATCGTTGGTTATCTCTACGTCTTCGTCAACGT  
TTACGTTT

AATATTTTACTGACGATGGTTTATTAACGAGGAGTGTGGTCCAGAGTGGCAAGGCATGAAGAGGTTTGA  
TGCCAGAAAGAAGGTCATTGAGCAGCTGAAGGAAAAGAACCTATACGTTGGCCAAGAAGATAATGAAATGA  
CCATTCCA

TTATACATGTGATATCAGAACGGAAGGTTTTACTCAACTTGACTGCCATCCCTCGGTTTGTAGTGAGGCAA  
CAGCTCCACAACCTCAGCTGGTAGTCTACCATCGACCTTGATGGCGTACATACCAGCTATACTATGATCTA  
CGCTCAGC

CTGGGATTTGCCTACTGGTGAGAAGAGAGACTTACTATTGAAGAAATTGAAGTTGAATGGTTGCAACGTTG  
GTGGATGTGCAGTCCATGCAGTGAGATTAAGACCTTCATTAACATTGAGGAGAAGCATGCTGATATCTTT  
ATTGAAGC

TGCTGTAGGTGCACTTATAGTGTATGATATAAGCAAATCAAGTTCATACGAAAATTGCAACCACTGGCTTA  
CCGAACCTGAGAGAGAACGCAGATGACAACGTGGCTGTTGGGTTGATAGGGAACAAATCAGATCTGGCTCAT  
TTAAGAGC

TGGCTGAAGTGGTTGAAGTTGAGGTTGCTGTTGAGGTTGCTGTTGAGGTTGCTGTTGAGGTTGCTGTTGAG  
GTTGCTGTTGAGGTTGCTGTTGAGGTTGCTGTTGAGGTTGCTGTTGAGGTTGCTGTTGCGCGATGTCTGGT  
TGCTGTTG

TGCTCTACGTTACTAAAGTAACGGATTACAAATTAACAAAAGATGCTTCAAACCAGTTTCGGCATTCCAT  
GGAGGGCTCAGTGTATCATTGCCCCACATTGGATGGAGATGTTTAACTCTATAGAACTACAAATGTTAAT  
ATCAGGTG

TGTCTTGATAGCGCCTGAAATGCGTTGAATTCGTTCCCTTTTCTCCTCTTCAGTTTCCTCTGCACGTTGTC  
TTGTACCCACACTTGGCCAAGAAAACCCATCTCTCTCGACAGGAGGTTTTAAAGTGTATGGAGAGGTAGGT  
CTAATGTT

CGGTGTTGAATGCTTCTCTACGGAATAGAACCTCTGATGAAAATCAATTTGTTCTGTTCCACCAAATTT  
GACAGAGGAGTGTGTTGCCACTCCTGCCTATGAACAGATAACAGATTCTGTGAATTCAGGTGGACAAGGA  
GTTGCCAT

GAGCTCCACTTCGAACCTCGTGGGGAGAGGATTTTGATCCGAGGAAGGTGTCGCTGGTGCCTTTCCATTAG  
TGCTTGACATCCTGGGTGGAGCTTGGGGGAACTTTGCCGTCTTATGAGTGCTATAAGTTTTGGCTTACTTT  
GCCTCATT

TCCGAAGCGGATTTACAAGCACCGCTGGACTCGTATGGGGTATAAGTGATACCTCTGACACCAGAGGCAAA  
GCTGCTGACGTCTTCGCCGGAAGAAGCTAGAGGAAGAAGCTTGGGAGGAAGAGGAAGATTGAGTAGATGTAG  
CAGCAGAG

GATTACAGGCCTAATTGAAGTCAACGAAAAGGAATTGGATGCAACTACCAAGGCAAAGACAGAAGACTTCG  
TCAAGGCATTCCAGGTCTTCGACAAGGAAAGTACAGGCAAGGTATCCGTTGGTGACTTAAGGTACATGCTA  
ACTGGCTT

CGTACAGGGTCTCAGACGACGAGGATAGTGGAGCTTATGACGAGTGGATTCCATCGTTCTGTTCCAGATT  
TGGTCACGAGTACTTCTGCCAAGTCCCACAGAGTTTATCGAGGATGATTTCAATATGACCTCGTTATCCC  
AAGAGGTA

AGACCGGTATCGTTTCTCGAAGACTGCGCACAACTTACAGTCTCAGAACAACCACCAGATTTGATGTT  
CATCAATGTGCACAATTGCACTTTGGTTGGATCGTGCCACTTTCTGTGCTGCAATTGTGCTGCATGAGTAA  
GTTTCGAGC

CACCTCACTTAAGCCCATGGGGTGATGCTATTGGTTACGATCCAACCTGCTCCTGTGCGAAGAAGGCGAAGAA  
GAAGAAAGTGAAAGTGAAAGTGAAAGTGAAGATCAAGTTGAGGAGGAAGATCAAGAAGTTGTTGCTGGAGA  
AGAAGATG

CTTAGCCTTTGGATATTGCTTCAAAGACTTCAAGAAAGCCTTATCAATAGCATCCAAACCTTCTTCTTTT  
TGGAAGCAGCCAAACAAGCAGTCAACATCAAGTCGTCTGGAGAAACACCTTCAACAGTGTATGGTTTCGTGC  
AAGGACAA

GAAAATCAATTTGTTCTGTTCCACCAAATTTGACAGAGGAGTGTGTTGCCACTCCTGCCTATGAACAGATA  
ACAGATTCTGTGAATTC AAGGTGGACAAGGAGTTGCCATTATTGTTTGAGTATTCCGTGTTATCCAGCGTG  
GAGAGAGA

GAGATACGGTGCTTCTGCCGGTAACGTCGGTGACGAAGGTGGTGTGCTCCAAACATTCAAACCTGCTGAAG  
AAGCTTTGGACTTGATTGTTGACGCTATCAAGGCTGCTGGTCACGACGGTAAGATCAAGATCGGTTTGGAC  
TGTGCTTC

CCACGGAAGTTGCTTCATCAGCACTATTTTCGACAGCATTAGTAGTAGAAGTGCTGGTAGTAGAAGTACTG  
GTGGTAGTGGTTGTCGTAGTTGCAGTGTGACGAGTTGCTTCAGTGGCCTCAGATGTGGTAGTAGAAGTAA  
GTCCCCTT

GACACACCAGTTTCTTATACAACCTTCAAGTTCGTCTGTTTCTCAAGTTTTCAGACACACCGGTTTCTTATAC  
AACTTCAAGTTCGTCTGTTTCTCAAGTTTTCAGACACACCAGTTTCTTATACAACCTTCAAGTTCATCTGTTT  
CTCAAGTT

TGAGCGCACCTCAAGTGAGAAACGCAGGCCAGAGATTCTCCAGGCAGGAAGGAATTGGGACAGATCCTGC  
CTGGAGGGATGGAGGAATTTACTTTCGTAGGCTGGAACAGGCTCATCTCAGCCAACGATTGTAAATGTGCAG  
GGCCATCG

TTCGACTTCTTCAGTGTACGTTCCCTCCTCTTCAACTTCATCTCCACCTTCGTCTCATCCGAATTGACAT  
CATCTCGTACTCATCATCCTCATCCTCATCCACCCTCTTTTCTACTCCTCCTCATTTTTCATCATCCTCA  
TCCTCATC

TTGAAACCAGTTAACATGAGAGGTATTAATCCACTGCTATGGTATTGTGTGGTTCTAACGACGACAAAGT  
TGAATTTGTGCGAGCCACCAAGGACTCTAAGGCCGGTGACAAGGTGTTCTTTGAAGGTTTCGGTGACGAAG  
CTCCAATG

TTCAGGTAAGCCATCAACATGTCCACTAGGTAGTCCATGTGGCGGACCTGCTGGGAACGGTCGTCATAGAA  
ATATCCCAAGCAAATGAAGTCGACGAGTCTGTGTTGGCTGCTCCATTAGTTCATCCAGCAAAGCTGTTT  
CCAACAAG

TCTCAATGGGCCGTGGACGAATTCCTCAACGGTAGATTCCGGTGATTTCGTCTTCTCCTGCGTTCCGGTGACTT  
GGATCTGTGTGGTTTCAGACTTGATCAGGCAATCAGCGAACAAATGTCTCGAATTATGGTCCACCCTACTT  
CCATCAAC

AGAAGAAAAAAGCTGTTGAGCGAGCTATTTCCGGGTATCCCAGCCTTCTCTGCAGACCGCCCCAGTTGGCT  
TGGCTCTGGTGCTGTTTCGTTAGCATCACATCGCCTGTGACAGGCAGAGGTAATAACGGCTTAAGGTTCTCT  
TCGCATAG

CATTTCTCCACTTTTCGCATACCTTGAAGTGATGAGACCCAACCAGCTCACCTTTACCCCATCACTCCACT  
CCCCATCAAAGAACCTGTACATTTACCCATACAACCTGACACATGTATCGTGGACGGCCTTAATAACGTGCA  
CCATGGTA

CTTTTGAATAATCTTGA AAAAGCCATCTTGGTCCAAACTACCACCAGCAGCAGATTGCTTGTCTGGATGGT  
ACTTGACAACCTGTTTTCTGTGAGCCTTGATGATTTGACTTTTCAGTAGCTCTGAAACGCAACTTAGACAAA  
CCCATAGC

GTAGGCGACTTGTTACCAACTTGGTTGTAACTTGCAACAAAGCAGAGGCACCTAGTGACTTAGTCTCTTG  
TTTAGCTGATAGATCAACCAAGACAAGGACAGAATCATCTGTGTTTCTATTTAGCAATGGAGTCCACGTTT  
TACTAGTG

CTTGGGATGGGGTAGCTTGGTTACCGTTAACCAATTCGTTACCAATGGAAACAGTGGTGACATCGTCCCAA  
GAACCGTAAGATTCAACAGCAGACTTGATGGTGTGACACCGTCTTGGATTTGGTCAACGTAGTAAATACC  
TAAAAAGA

AACACTTACCAATATCTGTTAACGATGGTGTAAATGAGAGTAGTATGCGCACCAGTCCTAGATGACGCAGCT  
GCAGCTTCGCAGCCTGCATGTCCAGCACCGATGACCACGACCTGTGTCTTGGTTGTGGGTTGGAAGCTTGT  
CAAAGAAG

TAGAAGAAGAAGTAGAGGACGACGTAGAGGACGACGTAGGTGTATTGGTTGATTTCGGTGGACTCCTGAGAA  
GCAATTGAGGTACTCGTTTGTGATTCAAAGTTGAAGTCGCAGCTGCTTGGTAAGAATGATGCTGACTTTG  
AGTGTTC

TCGTAACCCATATCATCTTGTGGCGAGTCGTAGAATGGTGAGATCCAAATGGCATCGGCACCAAGCTCTTT  
GATGTACTCCAGCTTGGAGGCAATCCCTTTCATGTCACCCAGCCATCGTCATTAGAGTCTTTGAAACTTG  
CTGGGTAA

GTGGTAGTTGGCTTGTTCCAAATAACCCACCTCCAATGGTGGATTGTTGAGGTTGTGCTGTTTGTTCGCC  
AAATAAACCTGTTCCAGTAGCTGTAGTTCCTGAAGCGGTAGTGCTTGAACCTTCTAGGCTGCCAAGAGCAG  
GCTTATTA

GTACATGCATTCACTCATTGTCCGGTGTAGACTATAAATCACTGGATGCAACTTGTCAATAACTTTCAACA  
ACTTCTCAGCATTTGCAAAGCTGATTTCTTTGTTCTTTGGCAGTGTCAAAGCTGCGACATCATCAGGCCTG  
AGCTTGTT

ATTTGCGACAAGCACCTTCTGCTGCAGAATTTACACCCGAATCTGTGCAACGTGTCAAGAACTTGCATTTG  
GCAGATTGTTTGAGAGCTAATAAGTCCACGATGGCTTGGGGTCTAGAAGCTCGTGTTCCTTCTTAGACAA  
AGACTTTT

TTTTTATGACACCAATCTATCATTTCTCCACTTTCGCATACCTTGAAGTGATGAGACCCAACCAGCTCACC  
TTTCACCCCATCACTCCACTCCCCATCAAAGAACCTGTACATTTACCCATACAACCTGACACATGTATCGTG  
GACGGCCT

GTCAGATTGTTGGTATTTCTTTGGCCAACCAACAAGTCGTTCAAACCTTAAACTGAACTTGGTCTCTTCA  
ACTGTACGGAACCTCTGAGTTTGTGCTCTGAGACTTCCATTGTTGTTTGGATTTGCATTGTTCAATCCTTGA  
AAATCCGT

TTTAAAGTAAATTCACTTAAGCCTTGGCAACGTGTTCAACCAAGTCGACAACCTCTGGTAGAGTAACCGTAT  
TCGTTGTCGTACCAGGAGACCAACTTGACGAACCTTGGAGACAATTGGATACCAGCGGAAGCATCGAAGAT  
GGAAGAGT

ATTCAGGATATGATTTCTAGGGGCAAACCTCTTTGTCATAGGTGAAGAAGAGACGAAAGTTACTAAGGAGCT  
CTACCTCGTTGACTCTGAAACCGGAAGAGGGGAGGATTTCCACTGATAATGTTGTCAAGTACAAGAATA  
TTGCTGAG

TATGAGATACTTCCACAAGCAACAAGCTCATTCTGGAAGCCAGTCTTGAACCTGGACAAATTGTGGACAT  
TGATCCCAGAAGACAAGAGAGACCAATACTTGAATCTGCTTCTAAGGAACTGCTCCAGTTATTGACACT  
TTGGCAGC

ACGAAGGAGATGGCTCTGACAATCACGAGGAAGGTGGAGAAGAAGGAAGTAGAGGAGCTGATGCTGATGTG  
TCCAGTGCACAGCAGCGTGCCGAAAGGGTTGCGGACCCATGGATATATCAAAGATCTAGATCAGCTATTAA  
TATAGAAA

TATTTGTATGCAGGAACGACACTTCTGGTATCGTACGTGCTACGACGGTTGACATTTGGAAGGCATTGGTT  
CCAAATACTCCAAGAGCTGTGAAAGAGATCCTTCCAACATTGACTGGTATGATAGTCACTCACTTGGCTTC  
ATCATCCA

GAGAAATCTTACGAAATTCTAAAAGAGCATGATGTGCGATTATGTCTTGGTCATCTTTGGTGGTCTAATTGG  
GTTTGGTGGTGTGATGACATCAACAAATTCTTGTGGATGATCAGAATTAGCGAGGGAATCTGGCCAGAAGAGA  
TAAAAGAG

TGGTATTGTGTGGTTCTAACGACGACAAAGTTGAATTTGTGCGACCACAAAGGACTCTAAGGCCGGTGAC  
AAGGTGTTCTTTGAAGGTTTCGGTGACGAAGCTCCAATGAAGCAATTGAATCCAAAAAGAAGATCTGGGA  
ACACTTAC

CTCATGACGGAGAGATACTATGCCATATATCTTCATTGTGCGACGAGCCTGGATGCCACAATAGCACCACC  
GCAACTTGAACCTGTAAGTATCCTCAGCTTTCTATGGACAGTTTCCTTGAAATGATTAGGGTATTTACTG  
TACCAGGA

CACGTTTTCGAATCTTCAGTATGAGTTGACGGAGGTGTGGAATCGGTTGGACTCACAGCTTTTGAAAGGACA  
TTTCTCGGTTGCTCAGGATGTAGTTCAATGTGCGATTGGAAGTCATGGTCAGATTCTATGTTAAGATCATT  
GGATTCTT

GGCTATCTATATTTTCGCACAAGCACCTTCTGCTGCAGAATTTACACCCGAATCTGTGCAACGTGTCAAGAA  
CTTGCAATTTGGCAGATTGTTTGAGAGCTAATAAGTCCACGATGGCTTGGGGTCTAGAAGCTCGTGTTCCCT  
TCTTAGAC

CTTACCAATATTCAACTCCCAAGGTTGTTTATTACCTGGTATCAAAAGGTCGCTGACAGAGAATCCACTCA  
AACCACACTTAGTCTTGGAACCTCTGCCTGTAGCACCTCGTCTCTGATTTACCACCAGAACCTGTAGCA  
GCACCTGG

TCTTCAAATGTTTTGTAACCCCTTTGATCTCCATATTGGTTATTTGTTGCGTTAAAGTGTTGCTGTTGCTG  
TTGCTGCTCATCCATGAACCACTGTTGCTGCTGCTGCTGTTGAACTATGATCAACTTCGGACGCATTTA  
AATCTATT

CCAAATTCGAAAGAAGTAAATCAAGCCACAAGAATGAAAGGCGTGTTCTTGAGATACAAACCTCCCTGGTG  
AGGATGTTTGAGAAGAATGTATGCTGAATATCTACCCAGAACAGTTATCGATATCGAGATCCATGTCCT  
TGAGCAAG

CGTCAATGGCGTCGTAATTAATCTTCTTGGAGAACTTGCCTTCTGCAACATGTTCTTGACACTATCAGCA  
GTTGTGAAATCACCACCTTCTCAGCTGCCTTCAATGCAGCGTGTAACCAGACTTATCTTGTAAGTCTGA  
CATCAATC

TTCTTGCACTCTTTGCCAGTCAAGGAATTCCAAATCATTGACACTTTGTTGCCAGGTTTGCAAGACGAAGT  
CATGAACATCAAGCCAGTTCAAAGCAAACCAGAGCCGGTCAAAGAACCAGATTTAAGGCTGTTGTCGTTG  
TTGGTGAC

TATTGATGGACACCACCTGGAGAGACGCTCATCAATCTCTACTTGCAACAAGAGTCAGAACCACGATTTG  
GCTACAATCGCTCCAACAACCGCACATGCCCTTGCAGGTCGTTTCGCCTTAGAATGTTGGGGTGGTGCCAC  
ATTCGATG

AAGTTCAAAGCAAGATTAGGCTTTCTGATGAATTGGTAGCGCAGAGTCTGGCAAAGTCTATTTCAAGTTCA  
CAGCGTCCGTTTACCACAATTGTTTGAGAACTCTTCTCCTTCTGTGCCTATAGCCACACTTGCAAACATT  
ACATGGTG

GGTAATATTAGATCATGGCTAGGGGGATCTGGAAGTACAATGATGTGCTCTCCCCCTCTCAAACACAACAC  
CAGGATGAACTAAGGGCTCATCTCGAAAGTCGAAGGTGCCTCATTGAGGTTATTAGTGGTGCCTGTTGTGT  
CTTCCATG

ACTTTTGATGAGAATCCTTTGCTCTTGGGAGATATGGGTGAGTAGTCGTTGTGAAAACAATGGCTTCTGCA  
CCTTGAGAAATAGGTGCAATGTCCACATCAGGAGTCAGGTAGGAAGATACTTTATCAATGAATTCTTGCGT  
CATAATGA

GGAGTGTACTGAAACAGCACCAGTGATTAACCAGTGAAAGAAGCGATGTAACCAGAGTGACCACCTTG  
GACTTCACAGACGAAGACTCTTCTTCTTGTGCGAGAAGCACTCTGTTTGATGTCATCAGTGAATTGACTA  
ATGCGTTC

CAGGTTTCAGACACATCGGTGTCTTATACAACCTCAAGTTCGTCTGTTTCTCAAGTTTCAGACACACCAGT  
TTCTTATACAACCTCAAGTTCGTCTGTTTCTCAAGTTTCAGACACACCGGTTTCTTATACAACCTCAAGTT  
CGTCTGTT

TTTTGTAACCCCTTTGATCTCCATATTGGTTATTTGTTGCGTTAAAGTGTGCTGTTGCTGTTGCTGCTCA  
TCCATGAACCACTGTTGCTGCTGCTGCTGTCTTGAACATGATCAACTTCGGACGCATTTAAATCTATTGA  
ATCTTCAT

ACAAGAGACAACACCTGGGACATCAGCTGTTCCAGAGAACCATCATCATGTCTCTCCTCAACCTGCTTCAG  
TACCACCTCCACAGAATGGACAGTACCAACAGCACGGCATGATGACCCCAAACAAGCTATGGCCTCTAAC  
TGGGCACA

GATTTCTAACGAAGGTGTCTTGGTGGGTGGTTCTTCCGGTTCGCTTCACTGCGGTTGTGAAATACTGTG  
AAGACCACCCTGAACTGACTGAAGATGATGTCATTGTTGCCATATCCAGATTCCATCAGGTCGTACCTA  
ACCAAATT

ACCACCATGTTGACTGGTATTGCCCCAGACCAAGTGACCAGAATGATCACCGGTGTTCCATGGTACTCCAG  
CAGATTAAGCCAGCCATCTCCAGTGTCTATCCAAGGACGGTATCTACACTATCGCAAACCTAGAGACAAA  
CGCCTTTA

TTGGGAACCTTGAGGCGTATAAGAGTGTGAGTGAGCATATGTTTGGGATGAGGACGTTGCTGGCATTGTGCG  
AGGGCCTTTGGTGGGGTCTTGATTGGTGCCCTTGCGCCAAGTTAGCTGCTGGTCTTGGTGGTTCGTGGCGGT  
TGAGATTG

TGACGGTTCCTCAAAGCAGCAACGTGCTTTCTGCCACCGTTGTGAACAGCAACCTTGATCAATTGGTTGTTG  
ACCTTGGTGAAGGTAACATCAATGTGCTTCAAGTTCCTGGTCAAAGTACCTCTTGGACCAACAACCTTGAC  
GATTCTGG

CGTCCTCATCCGAATTGACATCATCCTCGTACTCATCATCCTCATCCTCATCCACCCTCTTTTCTACTCC  
TCCTCATTTTTCATCATCCTCATCCTCATCATCCTCATCATCCTCATCCTCATCATCATCATCATCATCAT  
ATCATCAT

AAGGCAAAGAAGAACGCATATAGTAGAGAGTAAATCAAACACACGTAGAAACAAGTGGCAACTAGAACAGG  
TTCAGTGACAGCGAAGTACAAAGGTCTCAACAGACAAGCCCTCATCATTTCACTCATACTGACACCTTGCG  
CTTCCTGC

CTCGCTGAATCCATCTAATGCATTATCAAGAGCCCTCGGTATTGCATCAACGAGATTGTTTGGTGGTGCAA  
ATCAACAGCAGCAACAGCAACAAATCACATCTTCCCACCGTACAGTCAAACCTTGTGAAATCCCAACTT  
TTTCATGA

AGAAGGCTTCCACTAAGGCTAACTCTCAACAGACAACAACACCTGCTTCATCAGCTGTTCCAGAGAACCCC  
CATCATGCCTCTCCTCAAACCTGCTCAGTCACATTCACCACAGAATGGGCCGTACCCACAGCAGTGCATGAT  
GACCCAAA

TGGGTATGAAATTCATCACCGATTTGGTTATCAACCACTGTTCTACAGAACACGAATGGTTCAAAGAGAGC  
AGATCCTCGAAGACCAATCCGAAGCGTGACTGGTTCTTCTGGAGACCTCCTAAGGGTTATGACGCCGAAGG  
CAAGCCAA

AACGTAAAGGAATATGGCCAGCATGCATCTGTGGAATATTTGAAGGGTCTGGCACTTCAGATAACCCCTGGC  
AACAGCTCATATGCCACTTTGTACTCCTCAGATGACGGAAGGGATACTGAGATCCTTATTAAGCAGACAT  
GGCTAGCC

AATCTGGTATACTGGTAGCACTAGAACTAGCACTATTTATTGGAGAGCCCACAACCTTCTTCTTTCTGCCT  
CTTTTACCTCGAGGGTGGGAGTTTGTATGAATCTTCTGTGTCTCGTCAGTTCATCGCTTCTACTGAACCT  
TTTCACAC

AATATTGACGAAAATTGCATCTACGTTCTTATTGGATAAGATCAATTCGAAACCTTGTTTGATGGTCTCAG  
GGGTGGCACCACCACCACAATCCAAAAAGTTCGCAGGATCGCCTCCATTTAATTTGATGACATCCATAGTA  
GCCATAGC

ACGTACCTGTAGTGATTATGACCTGATCTGCCCAACCTGGGTACCGTCATCCAGAACCACACCTTTGATG  
ACCTTGTGGCCACATCCGGGGTCATACAAGATCAAGTCAGCAACTTTGTTCTGCAGCAGAGACAAGTTGGG  
GTGTGCTT

GTAAGGTTGGTATGAGATACTTCCACAAGCAACAAGCTCATTTCTGGAAGCCAGTCTTGAACCTGGACAAA  
TTGTGGACATTGATCCAGAAGACAAGAGAGACCAATACTTGAAATCTGCTTCTAAGGAAACTGCTCCAGT  
TATTGACA

CACTTGCCTCATGGTGTGTTGTAACGCTGTCTTGTGCTCATGTTCAAGAGGCCAACATGCAATGTCCAAA  
GGCCAAGAAGAGATTAGGTGAAATTGCTTTGCATTTCCGGTGCTTCTCAAGAAGATCCAGAAGAAACCATCA  
AGGCTTTG

CAAAGCAAACCAGAGCCGGTCAAAGAACCAGATTTAAGGCTGTTGTCGTTGTTGGTGACTCTAACGGTCA  
CGTTGGTTTTGGGTATCAAGACCGCCAAGGAAGTTGCTGGTGCCATCAGAGCTGGTATCATTATTGCCAAGT  
TGTCGGTT

TTCCAAGAAATGTACGACTACTGTGTTCAAATGATCAAGGATGGTAAAGCTTACTGTGACGACACTCCAAC  
TGAAAAGATGAGAGAAGAACGTATGGATGGTGTGCTTCTGCCAGAAGAGATCGTTCTGTTGAAGAGAAT  
TAAGAATT

ACAATGGATGGTTGACAAGGACTTGGTCGGAAATTGGGACGATCCAAGGTTCCCAACTGTCAGGGGTGTGA  
GAAGAAGAGGTATGACTGTGCAAGGTTTGAGGAACTTCGTCTTATCCCAAGGTCCATCCAGAAATGTCATT  
AACTTGGA

TAGAAGATTATACAGATAATTACTATCTTGGATACATAGATGCACCAGTCACAAGAAATCCATGTTTCAGAC  
CACCTAATTCCAGATTGTTTCAGGTCTAGAGAATCCAGTCTTTTCCCCCGTTATTTCATGTTATTTCATGCC  
ATATTCAT

CAATGCAGAGGACAAGACAACCTGTAGGTGAGTCCGTGAATGGTGTTC AACAGCCGGCCTCCTCCCAGTCAG  
ATGCCATGAAACAAGACAAGTACGTACGACTAAACCAAGAAATAGTAAGAACGATGGTGTGGATACAGCT  
ATATACCA

TTCTTCGCCCAACTTGACATCCATTTCTCAGCAACTCTCTGTGCAACAGACATTGCTGCGACACGACGAG  
GTTGAGTACATGCAACTTGAGTGTCTCTAAGTGTGGCATCTCATCGAATAAAACGAATTGAGGAATTTGT  
GTCGTTTT

ACCAGACAACCTGCACTAACTGAAAGATTCTTCCCAGGATTCGAACTTGATGCTGATGGAGACACTATCATC  
GGTGCCACAACCCACTTACAAGAAGAATACGACTCTGACTATGATTTCAGAAGATAATCTGACCCAGAATGG  
ATACGTCC

AAAGGTTTTGACTTCAGTATTCTGTCCTGGTTTTAACATTAGACAGGTGTTGAGAGGCGCCTGTATCCGTAC  
AGAAGCACTTGCTGTGTCGACGTTACAGGTGTTTGGAGGCTGTTATCATTCAAAGCAGTGACAATAGCAC  
CTCTAATA





TCAAGTGAGAAACGCAGGCCAGAGATTCTCCAGGCAGGAAGGAATTGGGACAGATCCTGCCTGGAGGGAT  
GGAGGAATTTACTTCGTAGGCTGGAACAGGCTCATCTCAGCCAACGATTGTAAATGTGCAGGGCCATCGTT  
ACAATCCT

ACTAACTTCAATCGCTGCTGGTGTGGCCGCGCCATCGCTGCTACTGCTTCCGCAACCACCACTCTAGCTCAAT  
CTGACGAAAGAGTCAACTTGGTTGAATTGGGTGTCTACGTCTCTGATATCAGAGCTCACTTGGCCCAATA  
TACTCTTT

GGTGTGCTCCAAACATTCAAACCTGCTGAAGAAGCTTTGGACTTGATTGTTGACGCTATCAAGGCTGCTGG  
TCACGACGGTAAGATCAAGATCGGTTTGGACTGTGCTTCCCTCTGAATTCTTCAAGGACGGTAAGTACGACT  
TGGACTTC

TTAGGGTCATTTTTTTCAGTACATTGGTTGGCCTGGCTTGAGTTGCAACCAGTGCCAAGCATCAGCGTTGGCC  
TCTCTCTTGTACATTGGTTGGCCTGGTCTCAAATTTAACCAGTGCCAAGCGTCGGCAACAGCCTCTCTTTT  
CGCCAAAG

CGCATGTATGGTAGCTTTGTTTCTACCTTGTGGTACTTTGACAACTCTTCGTCGTAGTGGAAGTCACCACT  
GTTGACCCAAACGATCTTTGTGTAACCTTCGGACACCTCATTCAAAGTGCTTGCCATTGCAACATGATAGC  
CGAGTGGT

ACATAAACAGGACTACGTCACCGACGGAAGCAAACGAAGTATCTTCACGATCTCATGCAGTGCTGCAATA  
CACATCATGCAGACAAATAAGCTTGTAGACTTGACCTCGCAACATACATTTGCTACACTTTCAATAATCGA  
TCTAGCTG

TAGTAGAGAGTAAATCAAACACACGTAGAAACAAGTGGCAACTAGAACAGGTTTCAGTGACAGCGAAGTACA  
AAGGTCTCAACAGACAAGCCCTCATCATTTCACTCATACTGACACCTTGGCCTTCCCTGCTCAGTCATAATC  
TTGGGATT

ACTTTAATTGAACCATTAGAAGAACATAGCAAGAATTTTCATGTTTCGTCACCGAGTTTGTCACTAGCTCATT  
GGAGACCGTTTTTCAGAGAAACCGATGATGAAGAGCAGAATTTCTTACAAGGTCATGTTAAAGATAATATCG  
TGGTACAG

AATGACAGGGAAGGCAAAGAAGAACGCATATAGTAGAGAGTAAATCAAACACACGTAGAAACAAGTGCCAA  
CTAGAACAGGTTTCAGTGACAGCGAAGTACAAAGGTCTCAACAGACAAGCCCTCATCATTTCACTCATACTG  
ACACCTTG

GTAACCAGAGTGACCACCTTGGACTTCACAGACGAAGACTCTTCTTCTTGTGCGAGAAGCACTCTGTTTGA  
TGTCATCAGTGTAATTGACTAATGCGTTCAAACAGGTATCAACACCAAGTGAGTATTCAGTACCTGGAACG  
TTGTTAGA

GTGGTGAAAGATTCTTCAACATCAAGTGCCGTTCCCTCTGGATTGACACCTAATGCTGTGGTCTTGGTTGCT  
ACTGTTAGGGCATTGAAGTCACACGGTGGTGTCCAGATGTCAAACCTGGCCAACCTTTACCTTCCGCATA  
CACTGAAG

TCCGGTGTAGACTATAAATCACTGGATGCAACTTGTCAATAACTTTCAACAACCTTCTCAGCATTGCAAAG  
CTGATTTCTTTGTTCTTTGGCAGTGTCAAAGCTGCGACATCATCAGGCCTGAGCTTGTATCATGTCTTGC  
CAATAAAA

CAATTCTATGCTATGTGAACTGTCCCTTGAAAGTGACCTAGGCCACTTCGACAATTTTCATCTTCTTCGTCGT  
CATCTTCTTCTTCTTCACTCTCCTCCTTCTTCTTCTTCCGCATTCTTTGATGGCATCTCTTCCACTGCT  
CCCGCACC

CCGTGCGACAAGATCACAAGAGGATCTTTGATGGCGACAAGGGCTTGAACACCGGTGGGATGGGTGCCTAT  
GCCCCGCTCCTGTGGCCACACCATCTTTGTTGAAGACCATAGATTACAGATTGTGAAGCCTACGATTGA  
TGGGATGA

TTCAATATGACCTCGTTATCCCAAGAGGTACCCACTACCGGAAAGCTCTGGATTTGATATTGGATTTGGA  
GGCTATGAGTGATGAAGAAGAGGACGAAGACGACGTGGTGGAAGAAGACGAAGTGATCAAGAGATGCAGA  
GTAATGAC

GAAGCACTCGTATAAAGTCTCTTAGTTTTCGTCGGAGGCATGTTGCATTTACCAACTGTCATAATCTCCCT  
GCCATCCTTCACTCTGTTTTCTGATGAATTGATTCATTTCTTGATGGAACCTCGTGAATACGTGGTCCATTCA  
ATGTGTAT

AAACCACCTCACGCAAGAAGAACAGGCGGTGGACGTATTGTCCCCGGAGTTCCTCCTGGTGCAGCAAAGAA  
GACCATCCCAGGGCTAGTTCGGGCATGAGTGCCAACAAGGACGCCAACACCAAGAACAGGAGAAGAAGAG  
CCAATAAA

GATTTTCGCTCGTATCAATTTTCGTTAGAACCTTGTGTCTAAGAGAAAGTTACAATGGATGGTTGACAAGGA  
CTTGGTCGGAAATTGGGACGATCCAAGGTTCCCAACTGTGAGGGGTGTGAGAAGAAGAGGTATGACTGTCC  
AAGTTTTG

GATTAAAGCATCGATATCGTCATCGTCAGAAGATTCAGATGCAGCGTCATCGTAAGTCTTAGCAGGCTTTT  
CTTGAGTTGGCTGATGAGCTGAAACAGAAGATGCTGAAGAGGATGATGAAGAGGATGATGTATCAGTCATA  
TTGATATT

AGCTAACTACAACAAGTACTCAAACAGTGGTTGAAACAATTACTTTGGACCAGGAAGAGGCTAGCGCTGTT  
GCTAATCATGCGCACGACGATGAGGCTTCCACAGACGTTGAAGGCTCCACAGACGTCAATGTCAATGAACA  
GGCTCTGT

TGCTAGCACCAACTCCAGCACTAATGCCACTACCACTGCTAGCACCAACTCCAGCACTAATGCCACTACCA  
CTGAAAGTACCAACGCTAGTGCCAAGGAGGACGCCAATAAAGATGGCAATGCTGAGGATAATAGATTCCAT  
CCAGTCAC

CAAAAGCAGGTATTACAACCTTAATAGAGATTCGTACCCCTTCGAGGCGGGTTTTGGAGCTACTTTTCGAAAT  
GGTGACAGAAGTCCCCATTCTTAGGCGACCACCGCCACCACAGGCTGCAAATAACACAACTCTGTATCAA  
ATAACACA

CATCACTACTTTTATTGGTAACTACGCTTCCCTCTTTTCAGATGGTGGGATTACTGTCTAGACACTGAATCTGG  
TCCAGAAGCTAAGGCCTCCAGAGAAGAAAGAATGAAGAAGAGAGCTGAAAACAATGCTCAAAAGAAGACTA  
ACTAAGAG

CATGAAAAGTCACAGTCCAAGGAGTATTTCAAATTGTCACTTGAAGTGAAAACACCCAGTGCTTCTCGAC  
ATCAGAGGTACCAGAGGTGTTTGGCTTCCAATCTTCATCAAAGGCTTCAAAAACAATAACGTTAACACCCC  
AAGCTCTC

GTGGATGAAGAGGAAGATACAGAAGACGAAGAAGATACAGTGGAAGAAACCGAGGAAGACACAGTGGAAGA  
AGCCGAGGAGGACACAGTGGAAGAAACCGAGGAAGATACAGTGGAAGACGCCGAGGAAGATACAGTAGAAG  
AGGATGTA

CCCATTTGGTGTGCAATAGTAAAGATGATGTCAACAAAATCTTGACCTCCTGTGTTGCTGCCATCCAATCG  
ATAAGGTCACACCAAACAGCAAAGAAAGGACGTAAGGGACAGGTATCCCATGCTGTTGCAGCTCCTTTGGT  
ATCTTTCA

CCATCAACATGTCCACTAGGTAGTCCATGTGGCGGACCTGCTGGGAACGGTCGTCATAGAAATATCCCAAG  
CAAATGAAGTCGACGAGTCTGTGCTTGGCTGCTCCATTCAAGTTCATCCAGCAAAGCTGTTTCCAACAAGAT  
CCTATCAA

GATCTTATCGGCGGTGGACACTAACTCTTCGTCATTCAAAGTGTCAACGATCAAACCAACTTGTTCGTCAA  
TCGTGGTGGCCTTGTGAGCATCAACAAAGTAGTCAGCTTCTTAGCAGAGTTACGGATGGCTCTCTTGTTC  
TTTTTCTT





GACCACGTCCGTAACCATCATCATCATAATCATCATCATAACGACTGCGTGACCCAGCGACATTCTCTT  
CTTCTTGATGATCTTGTGTTTGGACGTGTTGAGGATTTCATCAGTAGAATCAAAGGAATCTGGAATATCGTC  
GTAATAAT

GCCTGTTTCGGAAGCGTTTGC AAGTTGTGTGTGAATGAGAAGCCTCCTGCTGAATCTGCCGTTGCGGTGA  
AGTCTTTGGTCTTCAAACCAAAGACTCCAAAGTCCGCCACCCCTGTTCTATCGTTGTGGTGGCTTTGCAA  
TCTACTAC

CTTGGTGTAATGCAATTCGTTGATTTGACCGGAGATATAAGGTTCCAATGCACCGAAGTCCCACTTCAAGT  
CTGGCAAGGTGACTTTGGTTCTCCTTGCTGTGGTGGAGAGCAATGACAAACCACCTTCTTGGTTAAATTA  
GCAGCTGC

CATACGAGTACACTGAACAAGTTTATTGACAATGCAAGGGAGGAGGAAGACGCTGAAGAGGACTCTCAACC  
GACAGAAGAACCTGTACAGAAGGAAACACAGGACGCCAGCGACAGCGACAGCGACAGCGACGATGACTACA  
ATCCGGGC

GGACACACTTGTTCCTTATTCCCTGGAGAAACACATAGGTACTTGCTGAACGAAACAACCAAAAGAGTTGC  
TTGGTGCCACGATTCTCCCAAGCCTCCAAGTGACAGAATCACCTTCACTCTGCCTGTGTTGAAAGACGCCA  
AAGCCCTG

TCATTCTAAGGGACTTGACCCCAAGAGGTGAAAGACGTGAGATTCCATTGGCTGAGGTGCTTCCAGA  
ACCTTCTGGTGGTGAAGATACCGGTCTGGTTCCCCATTACCTCCACCGATATCGGTAGACATGTCAAAT  
ACCAATGG

GATTATCTCGCTTATCAGCAGAGTACTTTAATAAGAAGTCTTCGACCTCAGTTCCTATCTCGGTAGGTGAC  
ACACCTACTACCACGCCAGGTCCATTGAAGCTGCAGGTGTGGTTGCATGGAATGAAATTCTATCTCAGAC  
TGATATGA

CCCTGGAGAAACACATAGGTACTTGCTGAACGAAACAACCAAAAGAGTTGCTTGGTGCCACGATTCTCCCA  
AGCCTCCAAGTGACAGAATCACCTTCACTCTGCCTGTGTTGAAAGACGCCAAAGCCCTGTGTTTTGTGGCT  
GAGGGCAG

GCCTTCGGAAGTATCTTCGTTGGGGTCAGATCACCAGAATGATGGTGAGGATTCAGACACTGACAGTGACA  
ACTTTTTGCAAGACCCTGAAGACGATGTGGATGAAGAAAGCACTGGTAGAGGTACAGTCACTACCACTTCC  
ACATCCAC

CACTGAACAAGTTTATTGACAATGCAAGGGAGGAGGAAGACGCTGAAGAGGACTCTCAACCGACAGAAGAA  
CCTGTACAGAAGGAAACACAGGACGCCAGCGACAGCGACAGCGACAGCGACGATGACTACAATCCGGGCTT  
ATCCATGG

TGCAACCGTTTTCTCCAAATCATAACCACTGTTACTGTTACTCACTGTGACAACAATGGCTGTAACACCA  
AGACTGTCACTTCTGAATGTTCTAAAGAACTGCAGCAACCACCTTTCTCCAAATCATACTACTGTT  
ACCGTTAC

CTTTTGGCGTTTCAATTCCTAAGGGACTTGACCCCAAGAGGTGAAAGACGTGAGATTCCATTGGCTGAGG  
TGCTTCCAGAACCCTTCTGGTGGTGAAGATACCGGTCTGGTTCCCCATTACCTCCACCGATATCGGTAGA  
CATGTCAA

GTGTACATCATCAACATCTACCACCACAAGTACTACGTCGTC AACCTCATTTCACGAGCACATCATCA  
TCATCATCATCAACTCCAACCACAACATCGTCAGCCCCATTTCTACAAGCACGACGTCGTC AACTTCCAC  
TTCAACAA

CCTTCGCCTCTTGAAATAACAAATCCAACCTTTGCCATCAACTTCGACAGCTGGGGCACCGTTAGCGCACTT  
GCTGACATCACACTTGTCAAATGGCAAACCAATGAAGTCACGGAAGTTAATGATAGTATTCTTAGGATTTT  
TGATTAAT

GACCACTGACGGTGTACGAAATCAATTTTCAGAGTAATGGTTGGTGTTCAAATAACTGTGCTGGTCATCAGT  
TTGCCATCGTACAGGGGTTTCATGTGCTGGTGCAGTGATTTCGGAACCGAGCACTCAGACATCGGTGGGAGAC  
TGCAGTGG

ACCGCTGCTATGATGGGAGGCTTTTTCGGTTCATTCCTAAGGGACTTGACCCCAAGAGGTGGAAAGACG  
TGAGATTCATTGGCTGAGGTGCTTCCAGAACCTTCTGGTGGTGAAGATACCGGTCTGGTTCCTCCATTAC  
CTCCACC

ATAAGAAGTCTTCGACCTCAGTTCCTATCTCGGTAGGTGACACACCTACTACCACGCCAGGGTCCATTGAA  
GCTGCAGGTGTGGTTGCATGGAATGAAATTCCTATCTCAGACTGATATGATTTCCAAGGATCATGATCAGTT  
ATCAACCG

AAGAATTCGCAGCTTGTAGGCGGCCCTTTGAACTCTTCATCTTTACCTCGTATTCCGGCACGTCTCTCT  
GCTGCTCGTGCAGGTGCAGGTGCAGGTGCCTGTTTCAGGTTTCTGTGAGCAATCTCGTTCTTATCA  
ATCTCTCT

TTCTTCCTTACCTTCGCCTCTTGAATAACAAATCCAACCTTTGCCATCAACTTCGACAGCTGGGGCACCGT  
TAGCGCACTTGCTGACATCACACTTGTCAAATGGCAAACCAATGAAGTCACGGAAGTTAATGATAGTATTC  
TTAGGATT

GTCGACTTCTACGACCGTAAGTGTACATCATCAACATCTACCACCACAAGTACTACGTCGTC AACCTCA  
TTTCCACGAGCACATCATCATCATCAACTCCAACCACAACATCGTCAGCCCCATTTCTACAAGC  
ACGACGTC

CGAAAGTACCGACTCCAACACTAGTGCTACTACCACTGCTAGCACCAACTCCAGCACTAATGCCACTACCA  
CTGCTAGCACCAACTCCAGCACTAATGCCACTACCACTGAAAGTACCAACGCTAGTGCCAAGGAGGACGCC  
AATAAAGA

AGAAGAACAAATCAAAATATGCCTGTTTCGGAAGCGTTTGC CAAGTTGTGTGTGAATGAGAAGCCTCCTGC  
TGAATCTGCCGTTGCGGTGAAGTCTTTGGTCTTCAAACCAAAGACTCCAAAGTCCGCCACCCCTGTTCTTA  
TCGTTGTG

CGTCAGAAACGAACGCCTTTTGTGTTAGTTAATTGGTAAATCAGCCATGTGTCCACAGTGCCGAACATCAGG  
TCGTTCTCCTCATACGCCTTGGTACACAGAGGCTCATTGTGCGGAACAGCGCAGCTTGGAAACAGGAGAA  
ATACGTGG

GTTCTTATTCCCTGGAGAAACACATAGGTACTTGGTGAACGAAACAACCAAAAGAGTTGCTTGGTGCCAC  
GATTCTCCCAAGCCTCCAAGTGACAGAATCACCTTCACTCTGCCTGTGTTGAAAGACGCCAAAGCCCTGTG  
TTTTGTGG

TCCGTCAATCTGTAACGACCCAAATCGTATTAAGTTTTCGCCGTCCTGTTCACTGAACCTTCCCTCATTTG  
GAGAATCTCTCCTCGCCAGCGACGCAAAGTCCTTAGGCAACTCTAGTTCACCTTGAATCTCCAGCATCATC  
ATCCCAAG

CCAAGTTGTGTGTGAATGAGAAGCCTCCTGCTGAATCTGCCGTTGCGGTGAAGTCTTTGGTCTTCAAACCA  
AAGACTCCAAAGTCCGCCACCCCTGTTCTATCGTTGTGGTGGCTTTGCAATCTACTACTACTCTTCTGTC  
GTTGATTG

GTCAACCCTCATTTCCACGAGCACATCATCATCATCAACTCCAACCACAACATCGTCAGCCCCCA  
TTTCTACAAGCAGCAGTGTCAACTTCCACTTCAACAAGTACAACATCGCCAACCTTCTTCTTTCAGCACCT  
ACAAGCTC

GAACCTCTTCATCTTTACCTCGTATTCCGGCACGTCTCTCTGCTGCTCGTGCAGGTGCAGGTGCAG  
GTGCTGTTTCAGGTTTCTGTGAGCAATCTCGTTCTTATCAATCTCTCTATCTTGGCTCCGGAGATTTTG  
TTCTCGAT

CGCTATTCTCCATCTATGATCAGTCCACGTCTCCATATCTCTTGCAGTGTTCGAACTGTTGAACTTGACC  
TCCAGATCGTTTGCTGCTGTGATCAGAGAGCTGCATCCAGAATTGAGAACTGTGTTACTCTCTTTTATTT  
GATTTTAA

TTTTTCCAATTATGGAACGCCTGTTCTGATCCATGGCCTGCACTTGCGACCACAATCCACACCTGAGGC  
ACCTGCCTCTTTTCCAGCATGTGGCAACTGTCCCCACGACAGGGCATCCAGAATCCTCTGGTAAATCTTA  
AATGAAAC

GCTCTCGGTGACTCTTACACCAATAGCACCTCCTCCGAGACTTGAGTTCTATCACTTCCGTCTCGTCAGC  
TAGTGCAAGTGCCACCGCTTCCGACTCACTTTCTTCCAGTGACGGTACCGTTTATTTGCCATCCACAACAA  
TTAGCGGT

TGCAGAACACCGCTATTCTCCATCTATGATCAGTCCACGTCTCCATATCTCTTGCAGTGTTCGAACTGTT  
GAACTTGACCTCCAGATCGTTTGCTGCTGTGATCAGAGAGCTGCATCCAGAATTGAGAACTGTGTTACTC  
TCTTTTAT

GATGATGGTGCAGGAACACAGACGAAGATTACATGGCCTGGAAGGACTCCATCCTGGAGGTTTTGAAAGA  
CGAACTGCATTTGGACGAACAGGAAGCCAAGTTCACCTCTCAATTCAGTACACTGTGTTGAACGAAATCA  
CTGACTCC

AGAATATATCGTATGATAACGTAAGAGTATTTCAGTATCAACGGCAACAACAACAACAACAACAACAAC  
AGCACAACAACAGCACAACAACATCGAACGGTTGCTACTGCGACGTTACGGATTATATCCACAGTATATGG  
CGTGCAGC

CGTTTTGTCTCTAGTTTTGTGATAGTGTAGATACCGTCCTTGGATAGAGCACTGGAGATGGCTGGCTTTAAT  
CTGCTGGAGTACCATGGAACACCGGTGATCATTCTGGTCACTTGGTCTGGGGCAATACCAGTCAACATGGT  
GGTGAAGT

GCTGAAGTTTTGCAGAACACCGCTATTCTCCATCTATGATCAGTCCACGTCTCCATATCTCTTGCAGTGT  
TCGAACTGTTGAACTTGACCTCCAGATCGTTTGCTGCTGTGATCAGAGAGCTGCATCCAGAATTGAGAAAC  
TGTGTTAC

TGTAACAGGGTTGGCTCCTGCAGTTGCAGGCACATAATAACCTGTTGTGGTTGCTGTTGTTGCTGTTGCT  
GTTGTTGCTGTTGCTGTTGTTGCTGTTGTTGGAGATGATTCTGAGTGTAGTGAGCCTGAAATTCCATTTTA  
TCAAAACG

GAATCTTCAGTATGAGTTGACGGAGGTGTGGAATCGGTTGGACTCACAGCTTTTGAAGGACATTTCTCAG  
TTGCTCAGGATGTAGTTCAATGTCAGATTGGAAGTCATGGTCAGATTCTATGTTAAGATCATTGGATTGTT  
GGATCTCA

TGAGTGGGGCAGGGTAACGAGTGGGGAGGTAGGGTAATGTGAGGGTAGGTTAAGAGACAGGTTAGATAGGG  
TGGTGTGTGGTGTGTGGGTGTGGTGTGGGTGTGGGTGTGGTGTGTGGGTGTGGTGTGTGGGTGTGGTGT  
GGTGTGG

GTTTTTTTTCTCACGTGTGTTGGAAAAGGAAAAGGACCATGTTGAAGGCTTTGCTCCAGAAGTTGCCTGGG  
TCACCAGAGCTGGCTCCTCTGAATTGGAAGAACCAATCGCCATTAGACCAACTTCTGAAACTGTCATGTAT  
CCTTACTA

GTGCTACACCAGGAACCCCGCCCACTTGAGCATAACGAGTACACTGAACAAGTTTATTGACAATGCAAGGGA  
GGAGGAAGACGCTGAAGAGGACTCTCAACCGACAGAAGAACCTGTACAGAAGGAAACACAGGACGCCAGCG  
ACAGCGAC

CAAATGATTGAGAATATATCGTATGATAACGTAAGAGTATTTCAGTATCAACGGCAACAACAACAACAACA  
CAACAACAACAGCACAACAACAGCACAACAACATCGAACGGTTGCTACTGCGACGTTACGGATTATATCCA  
CAGTATAT



AAAAGAGTTGCTTGGTGCCACGATTCTCCCAAGCCTCCAAGTGACAGAATCACCTTCACTCTGCCTGTGTT  
GAAAGACGCCAAAGCCCTGTGTTTTGTGGCTGAGGGCAGTTCCAAACAAAATATAATGCATGAGATCTTTG  
ACTTGAAA

CATCTATGATCAGTCCACGTCTCCATATCTCTTGCCTGTTTTGAACTGTTGAACTTGACCTCCAGATCGT  
TTGCTGCTGTGATCAGAGAGCTGCATCCAGAATTGAGAACTGTGTTACTCTCTTTTATTTGATTTTAAGG  
GCTTTGGA

CTTATCAGCAGAGTACTTTAATAAGAAGTCTTCGACCTCAGTTCCTATCTCGGTAGGTGACACACCTACTA  
CCACGCCAGGGTCCATTGAAGCTGCAGGTGTGGTTGCATGGAATGAAATTCTATCTCAGACTGATATGATT  
TCCAAGGA

CAGTCCACGTCTCCATATCTCTTGCCTGTTTTGAACTGTTGAACTTGACCTCCAGATCGTTTTGCTGCTGT  
GATCAGAGAGCTGCATCCAGAATTGAGAACTGTGTTACTCTCTTTTATTTGATTTTAAGGGCTTTGGATA  
CCATCGAA

GTTTTATTGACAATGCAAGGGAGGAGGAAGACGCTGAAGAGGACTCTCAACCGACAGAAGAACCCTGTACAGA  
AGGAAACACAGGACGCCAGCGACAGCGACAGCGACAGCGACGATGACTACAATCCGGGCTTATCCATGGAT  
TTCCTCAC

CGAAACAACCAAAGAGTTGCTTGGTGCCACGATTCTCCCAAGCCTCCAAGTGACAGAATCACCTTCACTC  
TGCCTGTGTTGAAAGACGCCAAAGCCCTGTGTTTTGTGGCTGAGGGCAGTTCCAAACAAAATATAATGCAT  
GAGATCTT

GATTATCTTCTACCTCCTCTGAAACCACCACGAGATCCGCCACGAGATCCTCCTCTAAATGATCCGCCACG  
AGATCCACCTCTGAAAGAAGTCCACCACGGCCTCCTCTGAAAGAAGTACCACCACGGCCTCCTCTGAAAC  
CTCCTCTG

GAAGCGTTTTGCCAAGTTGTGTGTGAATGAGAAGCCTCCTGCTGAATCTGCCGTTGCGGTGAAGTCTTTGGT  
CTTCAAACCAAAGACTCCAAAGTCCGCCACCCCTGTTCTATCGTTGTGGTGGCTTTGCAATCTACTACTA  
CTCCTTCT

GTAATACGTCGTCACCCTCATTTCACGAGCACATCATCATCATCAACTCCAACCACAACATCG  
TCAGCCCCATTTCTACAAGCACGACGTCGTCAACTTCCACTTCAACAAGTACAACATCGCCAACCTTCTTC  
TTCAGCAC

TACATGGCCTGGAAGGACTCCATCCTGGAGGTTTTGAAAGACGAACTGCATTTGGACGAACAGGAAGCCAA  
GTTACCTCTCAATTCCAGTACACTGTGTTGAACGAAATCACTGACTCCATGTCGCTTGGTGAACCCTCTG  
CTCACTAT

GATGGTGAGGATTCAGACACTGACAGTGACAACTTTTTGCAAGACCCTGAAGACGATGTGGATGAAGAAAAG  
CACTGGTAGAGGTACAGTCACTACCCTTCCACATCCACTGAGTCAAGAGGCCGTCCATCTTCTTGTATCT  
TCGTGGCA

ATTCAGACACTGACAGTGACAACTTTTTGCAAGACCCTGAAGACGATGTGGATGAAGAAAAGCACTGGTAGA  
GGTACAGTCACTACCCTTCCACATCCACTGAGTCAAGAGGCCGTCCATCTTCTTGTATCTTTCGTGGCAAG  
CTTAGCAG

CCTTGTCTGAATCCATCAAGGCTGCTCAAGACTCTTTGCTGCCAACTGGGGTGTATGGTTTTCCACAGA  
TCTGGTGAAGTGAAGACACTTTTATTGCTGACTTGGTTGTGCGTTTTGAGAACTGGTCAAATCAAGACTGG  
TGCTCCAG

AATTCTTGATTAGACTTGTACTCCTAATATGTTGCGGCACTCAAGTGGTGACATGGCACCCTGCCGATA  
ACAATGCCTCTGGACCTCGAACTCCTGATGACGCTTCTTACATTGGATACGAACTGCCTCCGAGCTTGTAC  
GTCACGCA

TGTGAATGAGAAGCCTCCTGCTGAATCTGCCGTTGCGGTGAAGTCTTTGGTCTTCAAACCAAAGACTCCAA  
AGTCCGCCACCCCTGTTCTATCGTTGTGGTGGCTTTGCAATCTACTACTACTCTTCTGCGTTGATTGCC  
AACGCTAC

ATTCTGTGGAGGTGGTACTGAAGCAGGTTGAGGAGAGGCATGATGGAGGTTCTCTGGAACAGCTGATGAAG  
CAGGTGTTGTTGTCTGTTGAGAGTTAGCCTTAGTGGAAGCCTTATCATATTCTTGAATTTTGGAAAGCTGAA  
ACGTCTAA

GCAAGTATGGCGGTGTTGTGTGGTGTATGCGGAATAAAAAGAGTTCAAATACAAGTGTCCAAGATGTTTGGT  
GCAAACCTTGCTCTTTGGAGTGTTCCAAGAAGCACAAAGACAAGGGACAATTGCTCAGGTCAAACACATGATC  
CTAAGGAG

TGAGAACTGATGAGCTAGGCCGAGAAAGCTGGGAATATTTAACCCTCAGCAAGCCGCAAACGACCCACCA  
TCCACTTTCACGCAGTGGCTTCTTCAAGATCCCAAATTTCTCAACCTCATCCAGAAAGAAATAAGCATT  
ACCGATT

CTTCTTGCAGGCGGTTCATATTCTTCTGGTTGAAGAGGGGAACTCTGCCACCATGGATGCACACGTATTT  
GGATCATCTTTCGTCGCTGTTGTACTGTGAGCTCTTGTGTTGTGCTATGTTCTCGGTGCCCTTCATGGTTG  
TATCTCCC

AATGGTGAGAGAGATGGATATCGGTAGTCTGATGGGATTGTTGAACTTGGTGTGATCGTGAGAGGTAGCGA  
TGCCAGAAGCAGCAGGTGGCGTCTGGTTTGGGGGAGATGAGGGAACAGTATTAGTAGACATCCAGGAATAA  
CCACTATA

TGACCACTGGATCCATCACTTGCATAAACGACAGGGAAGTCGACCGATGTCCATGATGCCACGGTACTGTT  
GTGACTTGTACCAGAGCTGACAACAACCAAACCTTGGATACTAGAACTTAGTGATTGAATTAAGCTTTGAG  
AATATCCT

CATATCAGAGTCCGCTGAGGATGAATCAGTAAATGTATTACCTGACTCAGGTGATGGAGTGCTCAGAGGCG  
TTCCAACCTGATGATGGATACTGCGGAAACTGTGATTGTGGCCAGGTGGAAAGTACATAGGCGACATTTGA  
TAAGGTGT

GTTTCAAGTAGCTCTATCACGAGTAGTAGTAGTACGAGTATTGTGGACACAACCACAATCTCGCCGACTCT  
GACGTCAACGAGTACGACCCATTGACAACCGCCTCAACAGTACAACACCATCAACTGATATAACATCGG  
CACTGCC

GATCTGTACCATCTGTGTACTGGAGGGCTCCATTCAACGCCCTGGCTGATGTGACCCAGTTGGTGGAGTT  
CATTGTTCTGGACGTGGATTCTACAGGTATAAGCAGGGGAAATCGTGTCTTAGCTGACATTACTGTTGCTA  
GAACGTCT

TGTAAAGTTTGCAACACCTTGTTGTTTGGCGTGTTGAGCACGTTGCTCTGCGAGTGGAAGTGCACCGAGT  
CTCCAGGCTTGGGAGATGAGACGGTGCAGTACGTTGTTGGACTGATCGATTGCTTCTGTTTCTGAA  
TGACTCG

ATCAAAATATGCCTGTTTTCGGAAGCGTTTGCCTAAGTTGTGTGTGAATGAGAAGCCTCCTGCTGAATCTGCC  
GTTGCGGTGAAGTCTTTGGTCTTCAAACCAAAGACTCAAAGTCCGCCACCCCTGTTCTATCGTTGTGGT  
GGCTTTGC

AAAGAATCAGATGAAACTACTGTATGCCTACTAGAAGAGTGTTCGGTTTTCGACTTGGCACTGCAAATTTGTT  
TGATTCTTCAAGCAGCTCTGGGGCCCTCCAACCACTTGTGCCAGAAGGGTTATTCAAATTTGTTCTAAATG  
AAGACTGA

TTACCGATGATGGCACCATCGGATTATCCAGTTCTTCGATTTTCGTATCCAGGCGGTGGTGGTGGTGGT  
GGAAGTGCTAAGTCGCTGTCCTCTTCAAACCAAGGAGGTGGGGCGGTAGTCCACTCATCTTTCTTTGACG  
CTATTTTT

ATCAACATCTACCACCACAAGTACTACGTCGTC AACCCCTCATTTCCACGAGCACATCATCATCATCAT  
CAACTCCAACCACAACATCGTCAGCCCCCATTTCTACAAGCAGCAGCGTCGTC AACTTCCACTTCAACAAGT  
ACAACATC

ACCACCACAAGTACTACGTCGTC AACCCCTCATTTCCACGAGCACATCATCATCATCATCAACTCCAAC  
CACAACATCGTCAGCCCCCATTTCTACAAGCAGCAGCGTCGTC AACTTCCACTTCAACAAGTACAACATCGC  
CAACTTCT

TGTTCTCAATAAGAATTTCGAGCTTGTAGGCGGCCCTTTGAACCTCTTCATCTTTACCTCGTATTCCGGC  
ACGTCCTCCTGCTGCTCGTGCGGTGCAGGTGCAGGTGCAGGTGCCTGTTTCAGGTTTCTGTGAGCAATCTC  
GTTCTTAT

GAATTAGACGTGGCCATCTGTTTTGGATAATTTTCTTCACTCGCTGCGGCGTTGCCATTATCCACATCTGA  
AGGCTGCTGTTGCTGTTGCTGTTGCTGTTGCTGCTGTTGCTGCTGTAATTGTAATTGCCTTTGCT  
CTTCTAAT

TGCCAACTGGGGTGTATGGTTTTCCACAGATCTGGTGAAACTGAAGACACTTTCATTGCTGACTTGGTTG  
TCGGTTTTGAGAAGTGGTCAAATCAAGACTGGTGCTCCAGCTAGATCCGAAAGATTGGCTAAGTTGAACCAA  
TTGTTGAG

ATTACAGCTTTCATTTATAGAGCCCTCCGTTAGACTGGAAGTGCTAGGTGAGGGTGTTACTGGCGACAAG  
CACTCGTCTGTCAATCTGCACAATTTGTGGGAGCACATGATCTATGTAAAAGATCCTACGCTGTCCTTTAT  
CTTGACCC

TATGGAACGCCTGTTCTGATCCATGGCCTGCACTTGGCACCACAATTCCACACCTGAGGCACCTGCCTCT  
TTTCCAGCATGTGGCAACTGTCCCCACGACAGGGCATCCAGAATCCTCTGGTAAATCTTAAATGAAACTG  
ACGCGTGG

TGGGTGTGGTGTGTGTGGGTGTGGGTGTGGTGTGGGTGTGGGTGTGTGTGGGTGTGTGTGTGGGTGTGT  
GTGGGTGTGGGTGTGGGTGTGGGTGTGGTGTGTGTATATATATGTCACTGTATTGCATGCTGGATGGTGT  
AGACAAGG

CGGTGTTGTGTGGTGTATGCGGAATAAAAGAGTTCAAATACAAGTGTCCAAGATGTTTGGTGCAAACCTGC  
TCTTTGGAGTGTTC AAGAAGCACAAGACAAGGGACAATTGCTCAGGTCAAACACATGATCCTAAGGAGTA  
TATATCGA

TGGTGTATGCGGAATAAAAGAGTTCAAATACAAGTGTCCAAGATGTTTGGTGCAAACCTGCTCTTTGGAGT  
GTTCCAAGAAGCACAAGACAAGGGACAATTGCTCAGGTCAAACACATGATCCTAAGGAGTATATATCGAGT  
GAGGCGTT

CGAACATCAGGTGCTTCTCCTCATAACGCTTGGTACACAGAGGCTCATTGTGCGAGGAACCAGCGCAGCTTG  
GAACAGGAGAAATACGTGGAGAGCAATGGCAATCCAGTCTTCTGTCTAAGCTGCAGTTGCCTATCGACGCT  
AGTGTTTT

CCAACTCCAGCACTAATGCTACTACCCTGCCAGCATCAACGTCAGGACTAGTGCGACTACCCTGCCAGC  
ATCAACGTCAGGACTAGTGCGACTACCCTGAAAGTACCAACTCCAACACTAATGCTACTACCCTGAAAG  
TACCAACT

GTAAGAGAGTAGAAGAACAAATCAAAATATGCCTGTTTCGGAAGCGTTTGCCAAGTTGTGTGTGAATGAGA  
AGCCTCCTGCTGAATCTGCCGTTGCGGTGAAGTCTTTGGTCTTCAAACCAAAGACTCCAAAGTCCGCCACC  
CCTGTTCC

TGTTGAAGAACACCACAGTGATCGAGTTTCCACGATATTCGTTGCCATGACAGAGGCTGACCTACCAGAG  
GGCTACGAGGTGCTACACCAGGAACCCCGCCACTTGAGCATACGAGTACACTGAACAAGTTTATTGACAA  
TGCAAGGG

GCTGCTGACGCTTTGTTGTTGAAGGTTAACCAAATCGGTACCTTGTCTGAATCCATCAAGGCTGCTCAAGA  
CTCTTTTCGCTGCCAACTGGGGTGTATGGTTTCCACAGATCTGGTGAACTGAAGACACTTTCATTGCTG  
ACTTGGTT

GCGTATCGTTAATGGTGAGAGAGATGGATATCGGTAGTCTGATGGGATTGTTGAACTTGGTGTGATCGTGA  
GAGGTAGCGATGCCAGAAGCAGCAGGTGGCGTCTGGTTTGGGGGAGATGAGGGAACAGTATTAGTAGACAT  
CCAGGAAT

CACCACAGTGATCGAGTTTCCACGATATTGTTGCCATGACAGAGGCTGACCTACCAGAGGGCTACGAGG  
TGCTACACCAGGAACCCCGCCACTTGAGCATACGAGTACACTGAACAAGTTTATTGACAATGCAAGGGAG  
GAGGAAGA

TAACCATAAAGTAAGAGAGTAGAAGAACAAATCAAAATATGCCTGTTTCGGAAGCGTTTGCCAAGTTGTGT  
GTGAATGAGAAGCCTCCTGCTGAATCTGCCGTTGCGGTGAAGTCTTTGGTCTTCAAACCAAAGACTCCAAA  
GTCCGCCA

GGTACAGATCTGAAAGATTGCCAGCCAACTTACTACAAGCTCAACGTGACTACTTTGGTGTCTCACACTTTC  
AGAGTGTTGCCAGAATGTGCTTCTGACAACCTGCCAGTAGACAAGGATATCCATATCAACTGGACTGGCCA  
CGGTGGTA

AAACTCCTCATCGTCGTCGCTTTCGTCGACGATGTCTCGTCTCGCCAGCTCCAGTGGTGTCTCTAGCAT  
TTCCATCTTGCTTGTGCAAAGGATGCACCTGCTCCTTTTCAACAAGGTCCTGTAAACACGAGATTTTATCG  
GAAAGCTG

CTCTTCTAGCGCCCCAGACTCAATAATTCCTTCATCTAGCGCCTCCATCTCTGGTGTCTCAAACCTCCACTA  
CAGCATCTGGTTCAATCGCTTCTACTGCTTCCACCGCTTCCACTACTTCTACTGCATCCGCTGCATCCGCC  
ACCAGCTT

AAGAGCCAAGAGCTACTATGGCAATGGCATCAAAACATATCCCTTGCCATCTTCACCGAAATCGCCGACAT  
CAGAAGAAACACACTCATCTATGACAGCATCTGGAGAGGACTCACACCTACTTAAGCAATAGATTGTGCTA  
TCTGGGAC

ATTTCCACGAGCACATCATCATCATCAACTCCAACCACAACATCGTCAGCCCCATTTCTACAAG  
CACGACGTGCTCAACTTCCACTTCAACAAGTACAACATCGCCAACCTTCTTCTTCAGCACCTACAAGCTCGT  
CTAATACA

GCTGCTGTCAAATTTGTTGCTTATGAACAGATTAGGAATACCTTGATTCCCTCAAAGAATTTGAGTCACA  
TTGGAGAAGGTTGGTGTGAGTGGTTCCTGCGCAGGATTATGCAGTGTTCATAACATATCCGTTAGATCTCG  
TGAGGGTT

ACTCTTTTCGCTGCCAACTGGGGTGTATGGTTTCCACAGATCTGGTGAACTGAAGACACTTTCATTGCT  
GACTTGGTTGTGCGTTTTGAGAACTGGTCAAATCAAGACTGGTGTCTCCAGCTAGATCCGAAAGATTGGCTAA  
GTTGAACC

GTTTTCAATTTCTTCTTGCAGGCGGTCATATTCTTCTGTTGAAGAGGGGAACTCTGCCACCATGGATGC  
ACACGTATTTGGATCATCTTCGTCGCTGTTGTACTGTGAGCTCTTGTGTTGTGCTATGTTCTCGGTGCCCT  
TCATGGTT

AAACTCCACTACAGCATCTGGTTCAATCGCTTCTACTGCTTCCACCGCTTCCACTACTTCTACTGCATCCG  
CTGCATCCGCCACCAGCTTCACTCAGGTTCCGCTTCTGTCTACACTACTACATTAACTTACTTGAATGCC  
ACAAGTAC

CCTCATGAATTTCTAGTGGATGAAAGAAGCAGCACGAACACCATTTCTACAGACAACGACACATGGAAAGGT  
TCACCATTTCCAAAGAAAACAACGATGGCCACAAGGGTGTGGTCTCCATTCTCTACTGTTGGAAGGAGA  
TATTATCC

ACAGGCTATTATTACAGCTTTCCATTTATAGAGCCCTCCGTTAGACTGGAAGTGCTAGGTGAGGGTGTTAC  
TGGCGACAAGCACTCGTCTGTCAATCTGCACAATTTGTGGGAGCACATGATCTATGTAAAAGATCCTACGC  
TGTCTTTT

CCAAATCCATCCAAGCCAAGACCAAATGAAGAATTAGTGTTTCGGCCAGACATTCACCGATCATATGTTGAC  
CATTCTTTGGTCAGCCAAAGAAGGGTGGGGCACTCCACACATCAAGCCTTACGGTAATCTTTCTCTTGACC  
CATCTGCT

CGGTGAAGCTGATGATGGTGCAGGAACACAGACGAAGATTACATGGCCTGGAAGGACTCCATCCTGGAGG  
TTTTGAAAGACGAAGTGCATTTGGACGAACAGGAAGCCAAGTTCACCTCTCAATTCCAGTACACTGTGTTG  
AACGAAAT

GACATCTCTTTGGGACCTAAAGGCCACCGTCATTTGAGGGGACATCGTCGGCCAGACAGATGCTGAAACGG  
TCTCATTAGATCATCGCCAAGTGTCTGTAGTAGAGTCAACAGCAGTAACCCACGTTTCGAGTGAGGACCAT  
ATGATAAA

TTACAACAGTGGATTCAAGATGAAGAGGGCGGCAAGATCACGATCCCTCTGCCTTTGAAGAAACGACACAG  
ATCCCAGCAACACAATGACCAACAACCGCCACAACCACGCACCAAAGAGCTGATCATTCCGTCACATATTA  
GCCACTAT

TGTTTTAGTTAATTGGTAAATCAGCCATGTGTCCACAGTGCCGAACATCAGGTGCTTCTCCTCATACGCCTT  
GGTACACAGAGGCTCATTGTGAGGAACCAGCGCAGCTTGAACAGGAGAAATACGTGGAGAGCAATGGCA  
ATCCAGTC

CAGGAACACAGACGAAGATTACATGGCCTGGAAGGACTCCATCCTGGAGGTTTTGAAAGACGAAGTGCAT  
TTGGACGAACAGGAAGCCAAGTTCACCTCTCAATTCCAGTACACTGTGTTGAACGAAATCACTGACTCCAT  
GTCGCTTG

GTAACCATCATCATCATAATCATCATCATAACGACTGCGTGACCCAGCGACATTCCTCTTCTTTGATG  
ATCTTGTGTTTTGGACGTGTTGAGGATTCATCAGTAGAATCAAAGGAATCTGGAATATCGTCGTAATAATGG  
CTTGTGTT

TGAACTGTCCCAGTTATATTTGTAACAGGGTTGGCTCCTGCAGTTGCAGGCACATAATAACCTGTTGTGG  
TTGCTGTTGTTGCTGTTGCTGTTGCTGTTGCTGTTGTTGCTGTTGTTGAGATGATTCTGAGTGTAGT  
GAGCCTGA

ACGACCGTAAGTGTACATCATCAACATCTACCACCACAAGTACTACGTCGTCACCCTCATTTCACGAG  
CACATCATCATCATCATCAACTCCAACCACAACATCGTCAGCCCCATTTCTACAAGCACGACGTCGT  
CAACTTCC

CGCAATACCACGAGGCCAAGGAGCGTATCAGGCAGAAGGAAGTAACTGCAGGTGAAGCACAGGACGAAGCC  
AGCTTGCAGCAGCAACAGCAGCAAGATTTGCAGCAACAGCAACAAGTAGTGACTACAGTTGCCTCGCAAAG  
TCCTCATG

CAAATCGGTACCTTGTCTGAATCCATCAAGGCTGCTCAAGACTCTTTTCGCTGCCAACTGGGGTGTATGGT  
TTCCACAGATCTGGTGAAGTGAAGACACTTTTCATTGCTGACTTGGTTGTGCGTTTTGAGAACTGGTCAA  
TCAAGACT

CTAGTGCTACTACCACTGCTAGCACCAACTCCAGCACTAATGCCACTACCACTGCTAGCACCAACTCCAGC  
ACTAATGCCACTACCACTGAAAGTACCAACGCTAGTGCCAAGGAGGACGCCAATAAAGATGGCAATGCTGA  
GGATAATA

TTCATTTCAATATCTCTGTCTGCGTCAAGATCACCACCATACTCCAAATCAGAGTCGCTGTCTTCTTCTTC  
TTCATCATCATCATCCTCATCATCATCATCTTCATCATCATCCTCATCGCTTCTTCTCCATCATCATCAT  
CATCGTCA

TCTCTGGACACGTGCTGTATGTAGTTCACCACATCCATGCCGTCCACAACCTGTCCAAATACCACATGCTT  
TCCATCGAGCCACGACGCTTCTTCCGTAGTGGTGTATGAAGAAGTGGATCCATTGGTATCTTTACCACGAT  
TAGCCATC

GGCATCAACTTCACCTTCTTCGTATCTTCTTCTGCTGCGGCGTTGACACTGCCTTCTGCGGCGGCTTGCA  
TGTCAGCTTGGATGTCTTCTGGGGACTTGGTAGCGACGTCTTCGTTAGATGGCATAATACCGCTAGCTTGA  
GCTTGTGG

GTATCTTCGTTGGGGTACAGATCACCAGAATGATGGTGGAGATTGACACTGACAGTGACAACCTTTTGGCA  
AGACCCTGAAGACGATGTGGATGAAGAAAGCACTGGTAGAGGTACAGTCACTACCACTTCCACATCCACTG  
AGTCAAGA

CTTTGTTGTTGAAGGTTAACCAAATCGGTACCTTGTCTGAATCCATCAAGGCTGCTCAAGACTCTTTGCT  
GCCAACTGGGGTGTATGGTTTCCACAGATCTGGTGAAGTGAAGACACTTTCATTGCTGACTTGGTTGT  
CGGTTTGA

TCCTCCAAATCATAACCACTGTTACTGTTACTCACTGTGACAACAATGGCTGTAACACCAAGACTGTCAC  
TTCTGAATGTTCTAAAGAACTGCAGCAACCACCTTCTCCAAAATCATACTACTGTTACCGTTACTC  
ACTGTGAC

GAACGCCTTTTGTGTTAGTTAATTGGTAAATCAGCCATGTGTCCACAGTGCCGAACATCAGGTGCTTCTCCT  
CATAACGCTTGGTACACAGAGGCTCATTGTGAGGAACCAGCGCAGCTTGAACAGGAGAAATACGTGGAG  
AGCAATGG

ATACATTCGTTTTCATTTCAATATCTCTGTCTGCGTCAAGATCACCACCATACTCCAAATCAGAGTCGCTGT  
CTTCTTCTTCTTCATCATCATCATCCTCATCATCATCTTCATCATCATCCTCATCGCTTCTTCTCCA  
TCATCATC

GCTGCTCAAGACTCTTTGCTGCCAACTGGGGTGTATGGTTTCCACAGATCTGGTGAAGTGAAGACAC  
TTTCATTGCTGACTTGGTTGTGCGTTTGGAACTGGTCAAATCAAGACTGGTGTCCAGCTAGATCCGAAA  
GATTGGCT

CAACGGTCAACCAACTGACGAACTGTTATTGTTATCAGAATCACAACAGTGAAGGTCTAATCAGCACCA  
CCACTGAACCATGGACTGGTACTTTCACCTCTACATCTACTGAGGTTACCACCATCACTGGTACCAACGGT  
CAACCAAC

CAGTTATATTTGTAACAGGGTTGGCTCCTGCAGTTGCAGGCACATAATAACCCTGTTGTGGTTGCTGTTGT  
TGCTGTTGCTGTTGTTGCTGTTGCTGTTGTTGCTGTTGTTGGAGATGATTCTGAGTGTAGTGAGCCTGAAA  
TTCCATTT

CGAGGCCAAGGAGCGTATCAGGCAGAAGGAAGTAACTGCAGGTGAAGCACAGGACGAAGCCAGCTTGCAGC  
AGCAACAGCAGCAAGATTTGCAGCAACAGCAACAAGTAGTGACTACAGTTGCCTCGCAAAGTCTCATGCA  
ACTGCAAC

GAACTCTGCCACCATGGATGCACACGTATTTGGATCATCTTCGTCGCTGTTGTACTGTGAGCTCTTGTGTTG  
TGCTATGTTCTCGGTGCCCTTTCATGGTTTGTATCTCCAGAGGAGAAAATCGTCACTCAAGTTAAACAG  
ACCTTGCC

GAGTACTTTAATAAGAAGTCTTCGACCTCAGTTCCTATCTCGGTAGGTGACACACCTACTACCACGCCAGG  
GTCCATTGAAGCTGCAGGTGTGGTTGCATGGAATGAAATCTATCTCAGACTGATATGATTTCCAAGGATC  
ATGATCAG

TGGCCATCTGTTTTGGATAATTTTCTTCACTCGCTGCGGCGTTGCCATTATCCACATCTGAAGGCTGCTGT  
TGCTGTTGCTGTTGCTGTTGCTGCTGTTGCTGCTGTTGCTGCTGTAATTGTAATTGCCTTTGCTTCTAATAG  
CGGTTGTC

TCCACAGTGCCGAACATCAGGTCGTTCTCCTCATACGCCTTGGTACACAGAGGCTCATTGTGCGAGGAACCA  
GCGCAGCTTGGAACAGGAGAAATACGTGGAGAGCAATGGCAATCCAGTCTTCTGTCTAAGCTGCAGTTGCC  
TATCGACG

CTACGAAATGAGAATCCACAAGAGATACATCGACTTGGAAGCTCCTGTTCAAATCGTTAAGAGAATCACTC  
AAATCACCATTGAACCTGGTGTGGATGTGCAAGTTGTTGTTGCTTCCAATAAGCTGGTTCTAACTGGAAA  
TAATTTCC

AAATTCGAGTATTGAGTTCTGATTGTGGAGTTGCTGGCAATCAGAGTTGGCTCACAGGCATCAAAGAACCA  
TTGAACATTCTTCTGACCAGACAAAACGCCACAGGAACAGTGTAAGGAGGGAAAACACCAGAATACACAA  
CTTTATCT

AACAATATATGCGTACTCTTCGTCGCTGACGGTCTTGTATCTGACCCAGGGGAAAGACTGGTACTGCAATT  
GTGGCTCTTCGACCTTCAAGTACTCAACTTTTCAGGCCACTGCATGTACAGTACGGAATCTCGAAATCAATG  
TTGACCAA

AAAACACAGCGACCACTGACGGTGTACGAAATCAATTTTCAGAGTAATGGTTGGTGTTCAAATAACTGTGCT  
GGTCATCAGTTTGCCATCGTACAGGGGTTTCATGTGCTGGTGCAGTGATTTCGGAACCGAGCACTCAGACATC  
GGTGGGAG

GAGGCATTAGAAGATATTTGTGCGCTCGTAAAATTCGAGTATTGAGTTCTGATTGTGGAGTTGCTGGCAAT  
CAGAGTTGGCTCACAGGCATCAAAGAACCATTGAACATTCTTCTGACCAGACAAAACGCCACAGGAACAG  
TGTAAGGA

TTCGGAGCTTTGTTCTCAATAAGAATTCGCAGCTTGTAGGCGGCCCTTTGAACTCTTCATCTTTACCTC  
GTATTCGGGCACGTCCTCCTGCTGCTCGTGCAGGTGCAGGTGCAGGTGCCTGTTTCAGGTTTCTGT  
GAGCAATC

GAAGGTTAACCAAATCGGTACCTTGTCTGAATCCATCAAGGCTGCTCAAGACTCTTTTCGCTGCCAACTGGG  
GTGTTATGGTTTCCACAGATCTGGTGAAGTGAAGACACTTTTCATTGCTGACTTGGTTGTGCGTTTGGAGA  
ACTGGTCA

CGTACTCTTCATACATTCGTTTCATTTCAATATCTCTGTCTGCGTCAAGATCACCACCATACTCCAAATCA  
GAGTCGCTGTCTTCTTCTTCTTCATCATCATCATCCTCATCATCATCATCTTCATCATCATCCTCATCGCC  
TTCTTCTC

TAGGCAAGCTCGGTGAAGCTGATGATGGTGCAGGAACACAGACGAAGATTACATGGCCTGGAAGGACTCC  
ATCCTGGAGGTTTTGAAAGACGAAGTGCATTTGGACGAACAGGAAGCCAAGTTACCTCTCAATTCCAGTA  
CACTGTGT

TGGTCCTGATGGACACACTTGTTCCTTATTCCCTGGAGAAACACATAGGTAAGTCTGCTGAACGAAACAACCA  
AAAGAGTTGCTTGGTGCCACGATTCTCCCAAGCCTCCAAGTGACAGAATCACCTTCACTCTGCCTGTGTTG  
AAAGACGC

ATTGAAATTCCTGAGCATGAGAGAATAGAATTAATTAGATACATCGTCAATACAGCACATCCGGTTGATGG  
TGGCTGGGGTCTACATTCTGTTGACAAATCCACCGTGTGGTACAGTATTGAACTATGTAATCTTACGTT  
TATTGGGT

CTTGATCAGTTCGGTGTACGTGAAACTTTACGTTATTTGGTGCAACACAAAATGGTTGATGCTGTGCTTA  
CTTCTGCTGGTGGTGTGGAAGAAGATTTGATCAAATGTCTTGTCTCCAACCTTACTTGGGTGAATTTGCTTTG  
AAAGGTAA

ATTGGACAGTTTTTTTCCAATTATGGAACGCCTGTTCTGATCCATGGCCTGCACTTGCAGCCACAATTCCA  
CACCTGAGGCACCTGCCTCTTTTCCAGCATGTGGCAACTGTCCCACGACAGGGCATCCAGAATCCTCTG  
GTAAATCT

CTGGTGGAGTTGGCTATACATGAGAAATGCATCGGAGAATTGTTGAAGAACACCACAGTGATCGAGTTTCC  
CACGATATTCGTTGCCATGACAGAGGCTGACCTACCAGAGGGCTACGAGGTGCTACACCAGGAACCCCGCC  
CACTTGAG

CACTTCTATATTCTCTGAATCATCTACATCATCCGTCATTCCAACCAGTAGTTCCACCTCTGGTTCTTCTG  
AGAGCAAAACGAGTTTCGGCTAGTTCTTCTCTTCTTCTCTTCTATCTCTTCTGAATCACCAAAGTCTCCT  
ACAAATTC

TCAAGAGGATTTTGGACTTTGGATGCCTTATACTTCTTGAGATGGAAGGAGCTGATGCTACTGTGGTTGGT  
GTTTCCACAATTGTTCACTGTCAACTGATGAGGTCCATCTTCCATACTGAACATGCCCTTGTAATACGAT  
TTGCATAA

TACCACTGAAAGTACCAACTCCAGCACTAATGCTACTACCACTGCCAGCATCAACGTCAGGACTAGTGCGA  
CTACCACTGAAAGTACCAACTCCAACACTAGTGCTACTACCACCGAAAGTACCGACTCCAACACTAGTGCT  
ACTACCAC

TTCACATAAGTTTTGATGGTGCTTGGTGTAATGCAATTCGTTGATTTGACCGGAGATATAAGGTTCCAATGC  
ACCGAAGTCCCACCTTCAAGTCTGGCAAGGTGACTTTGGTTCTCCTTGCTGTGGTGGAGAGCAATGACAAAC  
CACCTTC

CACTAATGCTACTACCACTGCCAGCATCAACGTCAGGACTAGTGCGACTACCACTGCCAGCATCAACGTCA  
GGACTAGTGCGACTACCACTGAAAGTACCAACTCCAACACTAATGCTACTACCACTGAAAGTACCAACTCC  
AGCACTAA

TGATGGGAGGCTTTTTCGGTTCATTCTAAGGGACTTGACCCACACAAGAGGTGGAAAGACGTGAGATTCCA  
TTGGCTGAGGTGCTTCCAGAACCTTCTGGTGGTGAAGATACCGGTCTGGTTCCCCATTACCTCCCACCGA  
TATCGGTA

TACCGACTCCAACACTAGTGCTACTACCACCGAAAGTACCGACTCCAACACTAGTGCTACTACCACTGCTA  
GCACCAACTCCAGCACTAATGCCACTACCACTGCTAGCACCAACTCCAGCACTAATGCCACTACCACTGAA  
AGTACCAA

TGGTGTTCAAATAACTGTGCTGGTCATCAGTTTGGCATCGTACAGGGGTTTATGTGCTGGTGCAGTGATTC  
GGAACCGAGCACTCAGACATCGGTGGGAGACTGCAGTGGCACTTGTCCCGGTTATGGCTACGAAGATTGTG  
GTAATGCG

TTTCTAGCTAGATTATCTTCTACCTCCTCTGAAACCACCACGAGATCCGCCACGAGATCCTCCTCTAAATG  
ATCCGCCACGAGATCCACCTCTGAAAGAACTGCCACCACGGCCTCCTCTGAAAGAACTACCACCACGGCCT  
CCTCTGAA

TACCACTGCTAGCACCAACTCCAGCACTAATGCCACTACCACTGCTAGCACCAACTCCAGCACTAATGCCA  
CTACCACTGAAAGTACCAACGCTAGTGCCAAGGAGGACGCCAATAAAGATGGCAATGCTGAGGATAATAGA  
TTCCATCC

CTGGTGTCTCAAACCTCCACTACAGCATCTGGTTCAATCGCTTCTACTGCTTCCACCGCTTCCACTACTTCT  
ACTGCATCCGCTGCATCCGCCACCAGCTTACCTCAGGTTCCGCTTCTGTCTACACTACTACATTAACCTTA  
CTTGAATG

ACCAACCTTTAAATACGGTGAATATTACCAATGAAAGGAATGAGTACACACCTGAACTTTGTCAAAGAGAA  
GAATCCTCGAATAAAGAACCTTCAAGTCAAGTTCCTCAAGAAGTTTTCATCCTCTAGAGATAATAGGGCATC  
AAATAGAA

GTATCCTCATTTACCGATGATGGCACCATCGGATTATCCAGTTCTTTCGATTTTCGTATCCAGGCGGTGGTGG  
TGGTGGTGGTGGAAAGTGCTAAGTCGCTGTCTCTTCAAACCCAGGAGGTGGGGGCGGTAGTCCACTCATCT  
TTCTTTGA



AGACGAAGATTACATGGCCTGGAAGGACTCCATCCTGGAGGTTTTGAAAGACGAACTGCATTTGGACGAAC  
AGGAAGCCAAGTTCACCTCTCAATTCCAGTACACTGTGTTGAACGAAATCACTGACTCCATGTCGCTTGGT  
GAACCCTC

TATCTCTGTCTGCGTCAAGATCACCACCATACTCCAAATCAGAGTCGCTGTCTTCTTCTTTCATCATCA  
TCATCCTCATCATCATCATCTTCATCATCATCCTCATCGCCTTCTTCTCCATCATCATCATCATCGTCATC  
GTCATCGT

AACGATCGACATGGAAGCTGTCGCCTGATTTTCAGCCAATCTGTCCATTCTTCTATCAGTTCCACTGTGT  
CAGCAGACAGGTCTGTCCTGGAGCCACAGCATCCAACATGCTGGCCCTTTTTCTTTCTTTGATTCAAGT  
CCATAGAA

TTTTCTTCACTCGCTGCGGCGTTGCCATTATCCACATCTGAAGGCTGCTGTTGCTGTTGCTGTTGCTGTTG  
CTGCTGCTGTTGCTGCTGCTGTAATTGTAATTGCCTTTGCTCTTCTAATAGCGGTTGTCTCACAAACAGCC  
TGAAATCT

CTAATGCTACTACCACTGAAAGTACCAACTCCAGCACTAATGCTACTACCACTGCCAGCATCAACGTCAGG  
ACTAGTGCAGTACCCTGAAAGTACCAACTCCAACACTAGTGCTACTACCACCGAAAGTACCAGCTCCAA  
CACTAGTG

TTGGCTCCTGCAGTTGCAGGCACATAATAACCTGTTGTGGTTGCTGTTGTTGCTGTTGCTGTTGTTGCTG  
TTGCTGTTGTTGCTGTTGTTGGAGATGATTCTGAGTGTAGTGAGCCTGAAATTCCATTTTATCAAACGCT  
GAGGAATA

GGTACGGCCATTCTGTGGAGGTGGTACTGAAGCAGGTTGAGGAGAGGCATGATGGAGGTTCTCTGGAACA  
GCTGATGAAGCAGGTGTTGTTGTCTGTTGAGAGTTAGCCTTAGTGGAAGCCTTATCATATTCTTGAATTTT  
GGAAGCTG

ATCTTTACCTCGTATTCGGCACGTCCTCCTGCTGCTCGTGCGGTGCAGGTGCAGGTGCAGGTGCCTGTTT  
CAGGTTTTCTGTGAGCAATCTCGTTCTTATCAATCTCCTCTATCTTGGCTCCGGAGATTTTGTCTCGATAG  
GGAACAAT

TCGTGCTGCTCTTTCGTCTGACGATGTCTCGTCTCGCCAGCTCCAGTGGTCTGCTCCTAGCATTTCATCTTG  
CTTGTGCAAAGGATGCACCTGCTCCTTTTCAACAAGGTCTGTAAACACGAGATTTTATCGGAAAGCTGCT  
TATTGGCC

GCTATCAGACTAGGCAAGCTCGGTGAAGCTGATGATGGTGCAGGAACTACAGACGAAGATTACATGGCCTG  
GAAGGACTCCATCCTGGAGGTTTTGAAAGACGAACTGCATTTGGACGAACAGGAAGCCAAGTTCACCTCTC  
AATTCCAG

TGAAGAGGGCGCAAGATCACGATCCCTCTGCCTTTGAAGAAACGACACAGATCCCAGCAACACAATGACC  
AACAACCGCCACAACCACGCACCAAGAGCTGATCATTCCGTACATATTAGCCACTATGTCATGAATCTA  
CCAGACAG

TGGGACCTAAAGGCCACCGTCATTTGAGGGGACATCGTCCGCCAGACAGATGCTGAAACGGTCTCATTCCAG  
ATCATCGCCAACTGTCGTAGTAGAGTCAACAGCAGTAACCCACGTTTCGCAGTGAGGACCATATGATAAATA  
GGTATATG

CACCTTGTGGAATACTTGTGTTACTTATGAACCCAATTCCTGAACCATCATGACCACTGGATCCATCACTT  
GCATAAACGACAGGGAAGTCGACCGATGTCCATGATGCCACGGTACTGTTGTGACTTGTACCAGAGCTGAC  
AACAACCA

GCGTACTCTTTCGTGCTGACGGTCTTGTATCTGACCCAGGGGAAAGACTGGTACTGCAATTGTGGCTCTTC  
GACCTTCAAGTACTCAACTTTTCAGGCCACTGCATGTACAGTACGGAATCTCGAAATCAATGTTGACCAACT  
TATCTCGA

CCAAAGGACGAACTGACAAGTGTACAGAACAAGAACTAAAGACTGCAGATGGCAATAATACCCCAGTCAC  
GAAAGGTGTGCTGCTACACGAATCCATCCACAGCGTGGAGGATGCGTATGGAAAATTGCCTGAGGACGCCT  
TGGCGTTT

CTGTTCTGATCCATGGCCTGCACTTGGCACCACAATTCCACACCTGAGGCACCTGCCTCTTTTCCAGCAT  
GTGGCAACTGTCCCCACGACAGGGCATCCAGAATCCTCTGGTAAATCTTAAATGAACTGACGCGTGGCA  
GTAGATTC

ATTTCCCAATGTTTGTTCCTCACGTGTGTTGGAAAAGGAAAAGGACCATGTTGAAGGCTTTGCTCCAGAA  
GTTGCCTGGGTACCAGAGCTGGCTCCTCTGAATTGGAAGAACCAATCGCCATTAGACCAACTTCTGAAAC  
TGTCATGT

TACTAGAAACCCAAATCCATCCAAGCCAAGACCAAATGAAGAATTAGTGTTCGGCCAGACATTCACCGATC  
ATATGTTGACCATTCTTGGTCAGCCAAAGAAGGGTGGGGCACTCCACACATCAAGCCTTACGGTAATCTT  
TCTCTTGA

TCACGTGTGTTGGAAAAGGAAAAGGACCATGTTGAAGGCTTTGCTCCAGAAGTTGCCTGGGTACCAGAGC  
TGGCTCCTCTGAATTGGAAGAACCAATCGCCATTAGACCAACTTCTGAACTGTCATGTATCCTTACTACG  
CAAAATGG

TCCACGCTGGTGGTGTCTTTGGCTTTGCAAGAATTCATGATTGCTCCAAGTGGTGCTAAGACCTTCGCTGA  
AGCCATGAGAATTGGTTCGAAGTTTACCACAACCTTGAAGTCTTTGACCAAGAAGAGATACGGTGCTTCTG  
CCGGTAAC

TAACGGTCAATTAAGTATGAACTGTCATTGTCATCAGAACTCCAACAACAGCTAGCACCATCACAAC  
CCACCGAGCCATGGACCGGTACTTTACCTCTACATCCACTGAGATGACTACTGTCACCGGTACCAACGGT  
CAACCAAC

TTTTGGATAATTTTCTTCACTCGCTGCGGGCTTGGCATTATCCACATCTGAAGGCTGCTGTTGCTGTTGCT  
GTTGCTGTTGCTGCTGCTGTTGCTGCTGTAATTGTAATTGCCTTTGCTCTTCTAATAGCGGTTGTCTC  
ACAAACAG

GCACATCATCATCATCAACTCCAACCACAACATCGTCAGCCCCATTTCTACAAGCAGCAGCTCG  
TCAACTTCCACTTCAACAAGTACAACATCGCCAACCTTCTTCTTTCAGCACCTACAAGCTCGTCTAATACAAC  
ACCAACGA

AAATTTAGAGCACGTTGTAAATTGTGAGTAACATATTGCTCCCAAACCTTTCCATTCTGGTTGAACTTGT  
GCAAGAGTACCAAGACATCCAAGTGGCAAAACCTTCAATCAACCATAAGCCTTCCCACCAATCCATGGTGA  
CCAAGTTG

TCTATAGTTAAGTTTCCCATGACATCTCTTTGGGACCTAAAGGCCACCGTCATTTGAGGGGACATCGTCGG  
CCAGACAGATGCTGAAACGGTCTCATTTCAGATCATCGCCAACCTGTCGTAGTAGAGTCAACAGCAGTAACCC  
ACGTTTCGC

ATGAAACTACTGTATGCCTACTAGAAGAGTGTTCGGTTTCGACTTGGCACTGCAAATTGTTTGATTCTTCA  
AGCAGCTCTGGGGCCCTCCAACCACTTGTGCCAGAAGGGTTATTCAAATTTGTTCTAAATGAAGACTGACC  
AGAGTCTA

ACTTGCTGAACGAAACAACCAAAAGAGTTGCTTGGTGCCACGATTCTCCCAAGCCTCCAAGTGACAGAATC  
ACCTTCACTCTGCCTGTGTTGAAAGACGCCAAAGCCCTGTGTTTTGTGGCTGAGGGCAGTTCCAAACAAA  
TATAATGC

CGATCCAAAATGTTTAGCGGCGTCGTAGACGACTCACTTGCCGGCATTGTTGTCAGCTTGTGAGACGTCTC  
TGAAGGCTGCGACTTCTGTCTGCATGATTGTTTCAACACCCCAAGTACTTTCAGCCGCTTCTACCTCTTCT  
CTGATAAT

GGAATAAAAGAGTTCAAATACAAGTGTCCAAGATGTTTGGTGCAAACCTTGCTCTTTGGAGTGTTCCAAGAA  
GCACAAGACAAGGGACAATTGCTCAGGTCAAACACATGATCCTAAGGAGTATATATCGAGTGAGGCGTTGA  
AACAGGCG

AATACTTGTGTTACTTATGAACCCAATTCCTGAACCATCATGACCACTGGATCCATCACTTGCATAAACGA  
CAGGGAAGTCGACCGATGTCCATGATGCCACGGTACTGTTGTGACTTGTACCAGAGCTGACAACAACCAAA  
CCTTGGAT

CCAAGTGTACCGACGCAACTGCAACCGTTTCTCCTCAAATCATAACCACTGTTACTGTTACTCACTGTGA  
CAACAATGGCTGTAACACCAAGACTGTCACCTTCTGAATGTTCTAAAGAACTGCAGCAACCACCTTTCTC  
CAAATCA

AAAGAGCTAGGTGGTGTACTACTCGGTTCTATGACTGCTAACATCACGGGTCTTGCTGCTATTCAAGGTCT  
GTGTACATGTCTGGACACACTGTGTGCGCAGGCATACGGTGCCAAAACTACCCTTGGTGGGTGTGCTAG  
TGCAGAGA

TGGCTATACATGAGAAATGCATCGGAGAATTGTTGAAGAACACCACAGTGATCGAGTTTTCCACGATATTC  
GTTGCCATGACAGAGGCTGACCTACCAGAGGGCTACGAGGTGCTACACCAGGAACCCCGCCACTTGAGCA  
TACGAGTA

AACTCCAACACTAATGCTACTACCCTGAAAGTACCAACTCCAGCACTAATGCTACTACCCTGCCAGCAT  
CAACGTCAGGACTAGTGCAGTACCCTGAAAGTACCAACTCCAACACTAGTGCTACTACCACCGAAAGTA  
CCGACTCC

CCAAGGAGCTATTCGACACCCACAGAGTTATCGTTAATGAATGGAGTGGTTTTGTTCCAGCATTGAACAAG  
AAGAACGTTATCTTAGCACCATGGTGTGGTGTGATGGAATGTGAAGAAGATATCAAGGAATCTTCTGCAA  
GAAAGACG

ACCTGAGAACTTAACTGTTTGCAGATTCACACCTTCCCCCTTCAGTGCAGTGGTACAGTTCTTGAAAT  
ATCAAGAAGTGAATCTGAACAAGGACTGGCTGGCAAAAAGACAGAGAGGGCTCGAGTACTTCTCAATCAC  
ATCATCCT

CGAAGGGCGTTTTCCCACTATACTCTTCGCTGCAAGCGTGGGTGTGTGCCTTTTCCCACTGGAAACCAAAG  
GAATGATCAATGTGATACCAAGACATTGAGGAACATGAGTCCTTTGACGATTCTTACGCCATAGTCTGTC  
ATGCGACC

ATCCATCACTTGCATAAACGACAGGGAAGTCGACCGATGTCCATGATGCCACGGTACTGTTGTGACTTGTA  
CCAGAGCTGACAACAACCAACCTTGGATACTAGAACTTAGTGATTGAATTAAGCTTTGAGAATATCCTTC  
TTCGTATA

CTGCTGGTGGCCAATTGACAACAACCACCGATATCGAAAATTTCCAGGGTTTTCTGAATCGTTGAGTGGC  
AGTGAAGTATGAGAGGATGAGGAAACAATCTGCCAAGTTTGGCACTAACATAATTACCGAGACTGTCTC  
TAAAGTCG

CCTATCGCTCGGAAGACCTAAATTCCTGATTAGACTTGTACTCCTAATATGTTGCGGCACTCAAGTGGTG  
ACATGGCACCCTGCCGATAACAATGCCTCTGGACCTCGAACTCCTGATGACGCTTCTTACATTGGATACG  
AACTGCCT

CCGGTCTGGAATTCGAACGAATGAATCTCTGCGAAAAAGACCCCATCGAACTCTCACTTCTATGAGTGTGT  
CTTCTTCTCCTTCTCCTTCTCCTTCTCCTTCTCCTTCTTCTGGGAACAATTCGATAATCTGGATACTCCCT  
GACTTCCA

ATCGGAGAATTGTTGAAGAACACCACAGTGATCGAGTTTTCCACGATATTCGTTGCCATGACAGAGGCTGA  
CCTACCAGAGGGCTACGAGGTGCTACACCAGGAACCCCGCCACTTGAGCATACGAGTACACTGAACAAGT  
TTATTGAC

TGGTTTTGGAAACACGTTTTCGAATCTTCAGTATGAGTTGACGGAGGTGTGGAATCGGTTGGACTCACAGCT  
TTTGAAAGGACATTTCTCAGTTGCTCAGGATGTAGTTCAATGTCAGATTGGAAGTCATGGTCAGATTCTAT  
GTTAAGAT

GATTCGGTTCCTTATATCGAAGAGGCCTTGCAAGTGTATGCTGCAGGATTTGACAAAGAGTGGAAGCTGTT  
TAATACTGAGAAGGAAGAGAGTCTTTTCGACCTGGAAGACATTCAGCTCCCCAAAGAAGCTTACCGATTTA  
AGCTTACC

TCTTGGGTCAAATCACAAGGCCTACAGAGAAGAACCAGATTTGGAAAACCTGTTGTTCAACAAGTTCTTC  
GCTGATGCCGTCACCAAGGCTCAATCTGGTTGGAGAAAGTCAATTGCGTTGGCTACCACCTACGGTATCCC  
AACACCAG

GCCACACGTCGATCTCAGGCCGATCTGACAATCTTTAAAGGCATCAACAAGAGCAGCAGCTTGCCGACGTG  
GCAAAAGTCAAAGAAGAACAGAGGCAACTCGTCCTACGTGAAGCCACATAACAAGTTAGGAACTATTAG  
GCGGAACC

CTACTACCACCGAAAGTACCGACTCCAACACTAGTGCTACTACCCTGCTAGCACCAACTCCAGCACTAAT  
GCCACTACCCTGCTAGCACCAACTCCAGCACTAATGCCACTACCCTGAAAGTACCAACGCTAGTGCCAA  
GGAGGACG

TGCGTCAAGATCACCACCATACTCCAAATCAGAGTCGCTGTCTTCTTCTTCTTTCATCATCATCATCTCAT  
CATCATCATCTTTCATCATCATCTCATCGCTTCTTCTCCATCATCATCATCATCGTCATCGTCATCGTCA  
TCATCCTC

GGATTCAAGATGAAGAGGGCGGCAAGATCACGATCCCTCTGCCTTTGAAGAAACGACACAGATCCCAGCAA  
CACAATGACCAACAACCGCCACAACCACGCACCAAAAGAGCTGATCATTCCGTCACATATTAGCCACTATGT  
CATGAATC

ACTCCAACTAGTGAGGGTTTTGATTACTACAACACTACCGAACCATGGACCGGTACTTTTACCTCTACATCCAC  
TGAGGTTACCACCATCACTGGTACCAACGGTCAACCAACTGACGAAACCGTGATTGTATTAGAACTCCAA  
CTAGTGAG

AATGCAAGGGAGGAGGAAGACGCTGAAGAGGACTCTCAACCGACAGAAGAACCTGTACAGAAGGAAACACA  
GGACGCCAGCGACAGCGACAGCGACGATGACTACAATCCGGGCTTATCCATGGATTTCTCACTG  
CATGAGCC

GCGTCAAGTCTTAGCAAATGCAGAACGCTCATATAATCAACTAATGGATCGTGCAGCTAACGCACATATCT  
CACCACCAGTTCCAGGCCCTGCACTCTACGCAGGAATGACTCATGCTAATAATACTCCAGTAATGCCACCT  
CAGAGGCA

AAGCGCTCGAGAAAGTTGGAGTTTTTTCAGCGTTTTGCGTTCCATGACGAGCGCTGGACTGCAGGGTCCGCAG  
TACGTCAAGCTGCAGTTTAGCAGGCATCATCGACAGTTGAGGAGCAGATATGAATTAAGTCTAGGAATGCA  
CTTGCGAG

AACACTAGTGCTACTACCACCGAAAGTACCGACTCCAACACTAGTGCTACTACCCTGCTAGCACCAACTC  
CAGCACTAATGCCACTACCCTGCTAGCACCAACTCCAGCACTAATGCCACTACCCTGAAAGTACCAACG  
CTAGTGCC

TACCTCCTCTGAAACCACCACGAGATCCGCCACGAGATCCTCCTCTAAATGATCCGCCACGAGATCCACCT  
CTGAAAGAACTGCCACCACGGCCTCCTCTGAAAGAACTACCACCACGGCCTCCTCTGAAACCTCCTCTGCT  
ACCACCGC

GCCCCAGACTCAATAATTCCTTCATCTAGCGCCTCCATCTCTGGTGTCTCAAACCTCCACTACAGCATCTGG  
TTCAATCGCTTCTACTGCTTCCACCGCTTCCACTACTTCTACTGCATCCGCTGCATCCGCCACCAGCTTCA  
CCTCAGGT

CTTCCAACATTGTCAAGAACGCTGAACAACACAACCTTGGTCAAGAAGGGTCCAGTCAGACTACCAACCAAG  
GTTTTGAAGATCTCCACCAGAAAGACTCCAAATGGTGAAGGTTCTAAGACTTGGGAAACCTACGAAATGAG  
AATCCACA

TTTGTTCAGCATTGAACAAGAAGAACGTTATCTTAGCACCATGGTGTGGTGTGATGGAATGTGAAGAAGA  
TATCAAGGAATCTTCTGCAAAGAAAGACGATGGTGAAGAATTTCGAGGAAGATGACAAGGCACCAAGTATGG  
GTGCCAAA

AACACGTTTTCGAATCTTCAGTATGAGTTGACGGAGGTGTGGAATCGGTTGGACTCACAGCTTTTGAAAGGA  
CATTTCTCAGTTGCTCAGGATGTAGTTCAATGTGAGATTGGAAGTCATGGTCAGATTCTATGTTAAGATCA  
TTGGATTG

TCCAAGCTTCGAAGGGCGTTTTCCCCTATACTCTTCGCTGCAAGCGTGGGTGTGTGCCTTTTCCCCTG  
GAAACCAAGGAATGATCAATGTCGATACCAAGACATTGAGGAACATGAGTCCTTTGACGATTCTTACGCC  
ATAGTCTG

GCTTCCTCTGAATTTTCAAGGACGGTAAGTACGACTTGGACTTCAAGAACCAGAATCTGACAAATCCAA  
GTGGTTGACTGGTGTGCAATTAGCTGACATGTACCACTCCTTGATGAAGAGATACCAATTGTCTCCATCG  
AAGATCCA

TGGGGTCAGATCACCAGAATGATGGTGAGGATTCAGACACTGACAGTGACAACTTTTTGCAAGACCCTGAA  
GACGATGTGGATGAAGAAAGCACTGGTAGAGGTACAGTCACTACCACTTCCACATCCACTGAGTCAAGAGG  
CCGTCCAT

GCAGAAATTGCACCTTGTGGAATACTTGTGTTACTTATGAACCCAATTCCTGAACCATCATGACCACTGGA  
TCCATCACTTGCATAAACGACAGGGAAGTCGACCGATGTCCATGATGCCACGGTACTGTTGTGACTTGTAC  
CAGAGCTG

ATAACTGTGCTGGTCATCAGTTTGCCATCGTACAGGGGTTTCATGTGCTGGTGCAGTGATTCCGAACCGAGC  
ACTCAGACATCGGTGGGAGACTGCAGTGGCACTTGTCCCAGTTATGGCTACGAAGATTGTGGTAATGCGGA  
TAAGGATC

ATCCATCAAGGCTGCTCAAGACTCTTTTCGCTGCCAACTGGGGTGTATGGTTTTCCACAGATCTGGTGAAA  
CTGAAGACACTTTTCATTGCTGACTTGGTTGTGCGTTTTGAGAACTGGTCAAATCAAGACTGGTGTCTCCAGCT  
AGATCCGA

ATTCATTGAGGTTTTTCATTTCTTCTTGCAGGCGGTCAATTTCTTCTGTTGTTGAAGAGGGGAACTCTGCCA  
CCATGGATGCACACGTATTTGGATCATCTTCGTCGCTGTTGTACTGTGAGCTCTTGTGTTGTGCTATGTTCT  
CGGTGCCC

TGGCCCTCTCTCCGTCAATCTGTAACGACCCAAATCGTATTAAGTTTTGCGCGTCCTGTTCACTGAACCTT  
CCCTCATTTGGAGAATCTCTCCTCGCCAGCGACGCAAAGTCCTTAGGCAACTCTAGTTCACCTTGAATCTC  
CAGCATCA

AGGCCACCGTCATTTGAGGGGACATCGTCGGCCAGACAGATGCTGAAACGGTCTCATTCCAGATCATCGCCA  
ACTGTCGTAGTAGAGTCAACAGCAGTAACCCACGTTTCGAGTGAGGACCATATGATAAATAGGTATATGAG  
TATCCACA

AAATACGGTGAATATTCACAATGAAAGGAATGAGTACACACCTGAACTTTGTCAAAGAGAAGAATCCTCGA  
ATAAAGAACCTTCAGACTCAGTTCTCAAGAAGTTTCATCCTCTAGAGATAATAGGGCATCAAATAGAAGA  
TTTCAGCA

ATATAATCAACTAATGGATCGTGCAGCTAACGCACATATCTCACCACCAGTTCCAGGCCCTGCACTCTACG  
CAGGAATGACTCATGCTAATAATACTCCAGTAATGCCACCTCAGAGGCAGAGTTACCAAAGCAATGAGTAC  
TCACCTTA

TCGGCCAGACATTACCGATCATATGTTGACCATTCTTTGGTCAGCCAAAGAAGGGTGGGGCACTCCACAC  
ATCAAGCCTTACGGTAATCTTTCTCTTGACCCATCTGCTTGTGTATTCCATTATGCATTTGAATTATTTGA  
AGGTTTGA

GTCATTTAAGGATTCCGTTCTTATATCGAAGAGGCCTTGCAAGTGTATGCTGCAGGATTTGACAAAGAGT  
GGAAGCTGTTAATACTGAGAAGGAAGAGAGTCTTTTCGACCTGGAAGACATTCAGCTCCCCAAAGAAGCT  
TACCGATT

TTCACCACAATAGACTGCTCGCTGGCGTTGACCTGCTCTGAGGCATCAAAAACTCCTCATCGTCGTCGTC  
TTCGTCTGACGATGTCTCGTCCTCGCCAGCTCCAGTGGTCGTCCTAGCATTTCCATCTTGCTTGTGCAAAG  
GATGCACC

TGCCAGTACCAATGCGACTACCAACTCCAGCACTAATGCTACTACCACTGCCAGCATCAACGTCAGGACTA  
GTGCGACTACCACTGCCAGCATCAACGTCAGGACTAGTGCAGACTACCACTGAAAGTACCAACTCCAACACT  
AATGCTAC

AGGTTCTGATCATCCAAAGATCTTTGCGTACCAAATTCATGGGGTTTATCCACTCGTGTTCATTGGTGTCA  
TGGTCATGATCCACTCTGACAACAAGGGTTTGGTTATCCCACCAAGAGTGTCCCAATTCCAATCCGTTGT  
ATTCCAGT

TAAGCAATTGGAAAACGTCTCTTCCAACATTGTCAAGAACGCTGAACAACACAACCTTGGTCAAGAAGGGTC  
CAGTCAGACTACCAACCAAGGTTTTGAAGATCTCCACCAGAAAGACTCCAATGGTGAAGGTTCTAAGACT  
TGGGAAAC

TATTTTCGCCACAGGCTATTATTACAGCTTTCCATTTATAGAGCCCTCCGTTAGACTGGAAGTGTAGGTG  
AGGGTGTACTGGCGACAAGCACTCGTCTGTCAATCTGCACAATTTGTGGGAGCACATGATCTATGTAAAA  
GATCCTAC

GCTGAAGAACTGGCGCTGTCTCCGCATCTATCTATTCATTCACACCTAGCTCGTTCAAGAGCAGCGGTGA  
CATTTCTTTGAGTTTGTCAAAGGCCAAGAAGGGTGAAGTCACCTTTTCTCCATACTCTAACGCTGGTACCT  
TTTCTTTG

TTTAGGGACGAAAGAGCTAGGTGGTGTACACTCGGTTCTATGACTGCTAACATCACGGGTCTTGCTGCTA  
TTCAAGGTCTGTGTACATGTCTGGACACACTGTGTGCGCAGGCATACGGTGCCAAAACTACCACTTGGTG  
GGTGTGCT

ACTACCACTGCCAGCATCAACGTCAGGACTAGTGCAGACTACCACTGCCAGCATCAACGTCAGGACTAGTGC  
GACTACCACTGAAAGTACCAACTCCAACACTAATGCTACTACCACTGAAAGTACCAACTCCAGCACTAATG  
CTACTACC

ACTCGGTTCTATGACTGCTAACATCACGGGTCTTGCTGCTATTCAAGGTCTGTGTACATGTCTGGACACAC  
TGTGTGCGCAGGCATACGGTGCCAAAACTACCACTTGGTGGGTGTGCTAGTGCAGAGATGTGCTGTGATC  
ACCATCTT

TTATTGTTAGGCGTATCGTTAATGGTGAGAGAGATGGATATCGGTAGTCTGATGGGATTGTTGAACCTGGT  
GTGATCGTGAGAGGTAGCGATGCCAGAAGCAGCAGGTGGCGTCTGGTTTGGGGGAGATGAGGGAACAGTAT  
TAGTAGAC

ATGACTGCTAACATCACGGGTCTTGCTGCTATTCAAGGTCTGTGTACATGTCTGGACACACTGTGTGCGCA  
GGCATAACGGTGCCAAAACTACCACTTGGTGGGTGTGCTAGTGCAGAGATGTGCTGTGATCACCATCTTGG  
CGTTCTTG

CGTATTCGGCACGTCTCTCTGCTGCTCGTGCAGGTGCAGGTGCAGGTGCAGGTGCCTGTTTTAGGTTTTCTG  
TGAGCAATCTCGTTCTTATCAATCTCTCTATCTTGGCTCCGGAGATTTTGTCTCGATAGGGAACAATGG  
TGGTAGTG

GTATTGAAGTGCCAATATTTGGCGACAATGGAAACCGTAACCCAACTGGTAATACCAACCCAGCAACAACA  
ACAGCTATCCAAAGCAACAACAACACCAACAATGCTTCTCCGGCAACATCTACAGTTTCCTTACAACCTACC  
TAATTTAC

GGATGCCTTATACTTCTTGAGATGGAAGGAGCTGATGCTACTGTGGTTGGTGTTCACAAATTGTTCACTG  
TCAACTGATGAGGTCCATCTTCCATACTGAACATGCCCTTGTAATACGATTTGCATAACGGCCAACAGTA  
GCACCAAT

CGTGCTGTATGTAGTTTACCACATCCATGCCGTCCACAACCTGTCCAAATACCACATGCTTTCCATCGAGC  
CACGACGCTTCTTCCGTAGTGGTGATGAAGAAGTGAAGATCCATTGGTATCTTTACCACGATTAGCCATCGA  
TAGTCTGC

CATCTCCCTTCACTCTTCCAGGTTTGGAGTACGCTTCTCTAAATAGGGGACGACTTGCTTTCTGGTGGCCT  
CGACGTTTCAAGTTGCTTAAACATCGCCACACCTCCATCAAGATTGCCCCAAATAATTGAAGTTGGAGCTTG  
TCGCTAAC

TGAAAGTACCAACTCCAACACTAATGCTACTACCACTGAAAGTACCAACTCCAGCACTAATGCTACTACCA  
CTGCCAGCATCAACGTCAGGACTAGTGCAGTACCCTGAAAGTACCAACTCCAACACTAGTGCTACTACC  
ACCGAAAG

GCAACACCTTGTGTTTGGCGTGTTCAGCACGTTGCTCTGCGAGTGGAACTGCGACCGAGTCTCCAGGCT  
TGGGAGATGAGACGGTCGACTACGTTGTTGGACTGATCGATTGCCTTGTTCGTTCTGAATGTACTCGTC  
AGCATCCC

GGTGATGACACACCTCACAATTCACAAAGAGAATACGATATCCCCAATGTAGTGCAATGTAAAGAGGTGAA  
GAAAGTGCAAGAAGAGGAAGCTGATCCGTGCAAGATGGTTCATGTTATCTTCTATTCTTTATGGAACCTG  
ATATATTA

CTCATTAATTGTTATTGGAACAGCGCCTATTTTACATTCCTGGACGAGAGAAGTCGCAGTGGTGTTCCTGG  
TGAAGTCAAGGAAAGCCTTACATGAACCAATGGTTGGGTGACCAGCAAATGGCAATTCACCTTCTGGAGTA  
AAGATCCT

TCCGCTGAGGATGAATCAGTAAATGTATTACCTGACTCAGGTGATGGAGTGCTCAGAGGCGTTCCAAGTGA  
TGATGGATACTGCGGAACTGTGATTGTGGCCAGGTGGAAAGTACATAGGCGACATTTGATAAGGTGTAT  
ACGGAATC

ACGTTATTTGGTGCAACACAAAATGGTTGATGCTGTGCTTACTTCTGCTGGTGGTGTGGAAGAAGATTTGA  
TCAAATGTCTTGTCCAACCTTACTTGGGTGAATTTGCTTTGAAAGGTAAATCTTTGCGTGACCAAGGTATG  
AATCGTAT

AATCACAAAGGCCTACAGAGAAGAACCAGATTTGGAAAACCTTGTGTTCAACAAGTTCTTCCGCTGATGCCG  
TCACCAAGGCTCAATCTGGTTGGAGAAAGTCAATTGCGTTGGCTACCACCTACGGTATCCCAACACCAGCC  
TTTTCCAC

ACTTGATGTTTTGTTGGATAGCAATCATTCTTCTGCGTTTGCAGGAGAGGGCTCCTTGGCCAGAAGATCT  
GAGAGTTCTTGAATTGGTCAACAGCAGTGTTGAATCCGTTACATAAGTTTGTGGTGTCTGGTGTAAATG  
CAATTCGT

TCATCATAATCATCATCATAACGACTGCGTGACCCAGCGACATTCCTCTTCTTCTTGGATGATCTTGTGTT  
TGGACGTGTTGAGGATTCATCAGTAGAATCAAAGGAATCTGGAATATCGTCGTAATAATGGCTTGTGTTGT  
CGCTGTAT

TTTATGGATCCGACTACTTTGCAAACCGCGGATCTGTACCATCTGTGTACTGGAGGGCTCCATTCAACGC  
CCTGGCTGATGTGACCCAGTTGGTGGAGTTTATTGTTCTGGACGTGGATTCTACAGGTATAAGCAGGGGAA  
ATCGTGTC

AGAACTACTACCTCATGAATTCTAGTGGATGAAAGAAGCAGCACGAACACCATTTCTACAGACAACGACAC  
ATGGAAAGGTTCCACCATTCCCAAAGAAAACAACGATGGCCACAAGGGTGTGGTCTCCATTCTCTACTGT  
TGGAAGGA

TCACCAGAATGATGGTGAGGATTCAGACACTGACAGTGACAACTTTTTGCAAGACCCTGAAGACGATGTGG  
ATGAAGAAAGCACTGGTAGAGGTACAGTCACTACCCTTCCACATCCACTGAGTCAAGAGGCCGTCCATCT  
TCTTGTAT

ATTGCTCTCCTGGAAGCTAGACGGTAACGCAACGATCGACATGGAAGCTGTCGCCTGATTTTCAGCCAATC  
TGTCCATTCTTTCTATCAGTTCCACTGTGTGTCAGCAGACAGGTCTGTCTGGAGCCACAGCATCCAACATGC  
TGGCCCTT

CAGCCATGTGTCCACAGTGCCGAACATCAGGTCGTTCTCCTCATACGCCTTGGTACACAGAGGCTCATTGT  
CGAGGAACCAGCGCAGCTTGGAACAGGAGAAATACGTGGAGAGCAATGGCAATCCAGTCTTCTGTCTAAGC  
TGCAGTTG

GTTGAATCCGTTTACATAAGTTTTGATGGTGCTTGGTGTAATGCAATTCGTTGATTTGACCGGAGATATAAG  
GTTCCAATGCACCGAAGTCCCCTTCAAGTCTGGCAAGGTGACTTTGGTTCTCCTTGCTGTGGTGGAGAGC  
AATGACAA

AGGAACCCCGCCCACTTGAGCATAACGAGTACACTGAACAAGTTTATTGACAATGCAAGGGAGGAGGAAGAC  
GCTGAAGAGGACTCTCAACCGACAGAAGAACCTGTACAGAAGGAAACACAGGACGCCAGCGACAGCGACAG  
CGACAGCG

TTTGATGGTGCTTGGTGTAATGCAATTCGTTGATTTGACCGGAGATATAAGGTTCCAATGCACCGAAGTCC  
CACTTCAAGTCTGGCAAGGTGACTTTGGTTCTCCTTGCTGTGGTGGAGAGCAATGACAAACCACCCTTCTT  
GGTTAAAT

TTCTCTGAATCATCTACATCATCCGTCATTCCAACCAGTAGTTCCACCTCTGGTTCTTCTGAGAGCAAAAC  
GAGTTCGGCTAGTTCTTCTCTTCTTCTTCTTCTATCTTCTTCTGAATCACCAAAGTCTCCTACAAATTCTT  
CTTCATCA

CTCTCACTTCTATGAGTGTGTCTTCTTCTCCTCCTTCTCCTCCTTCTCCTTCTCCTTCTTCTGGAACAAT  
TCGATAATCTGGATACTCCCTGACTTCCAAGTCAAAGACACAGATATCCCGATTGATAGGTACATAGACC  
AGTCAATC

GTGAAACTTTACGTTATTTGGTGCAACACAAAATGGTTGATGCTGTGCTTACTTCTGCTGGTGGTGTGGAA  
GAAGATTTGATCAAATGTCTTGCTCCAACCTTACTTGGGTGAATTTGCTTTGAAAGGTAAATCTTTGCGTGA  
CCAAGGTA

ACTCCAACAACAGCTAGCACCATCACAACCTACCACCGAGCCATGGACCGGTACTTTACCTCTACATCCAC  
TGAGATGACTACTGTCCACCGGTACCAACGGTCAACCAACTGACGAAACTGTTATTGTATTAGAACTCCAA  
CTAGTGAG

AAGACCCTGAAGACGATGTGGATGAAGAAAGCACTGGTAGAGGTACAGTCACTACCCTTCCACATCCACT  
GAGTCAAGAGGCCGTCCATCTTCTTGTATCTTCGTGGCAAGCTTAGCAGCAGCCCTATCCGATGACGAATT  
ATGTCTGT

ACTTTGACCTCCACCAAGGTTAAGCAATTGGAAAACGTCTCTTCCAACATTGTCAAGAACGCTGAACAACA  
CAACTTGGTCAAGAAGGGTCCAGTCAGACTACCAACCAAGGTTTTGAAGATCTCACCAGAAAGACTCCAA  
ATGGTGAA

GCGTTGGTTACGTCAGAAACGAACGCCTTTTTGTTTGTAGTTAATTGGTAAATCAGCCATGTGTCCACAGTGCC  
GAACATCAGGTCGTTCTCCTCATACGCCTTGGTACACAGAGGCTCATTGTGCGAGGAACCAGCGCAGCTTGG  
AACAGGAG



GGTCTTGTATCTGACCCAGGGGAAAGACTGGTACTGCAATTGTGGCTCTTCGACCTTCAAGTACTCAACTT  
TCAGGCCACTGCATGTACAGTACGGAATCTCGAAATCAATGTTGACCAACTTATCTCGAGGAGTAACGTGG  
GAAGTTTG

GACTGCGATGTTCTACGTGGAGTATAGTAACTAGCAGGATTGAGCCTCCTGCACTCTTTGAGCCTCAATAG  
AGAAGCGATCTCCTCGGAGAGTTTTCTTCCCTTATGCTGGTGACCATCTTTAAGTTGTTTGTGTTGTCCTT  
GTGAAACT

TTGAAATAACAAATCCAACCTTTGCCATCAACTTCGACAGCTGGGGCACCGTTAGCGCACTTGCTGACATCA  
CACTTGTCAAATGGCAAACCAATGAAGTCACGGAAGTTAATGATAGTATTCTTAGGATTTCTGATTAATTG  
TTGCAAAG

GTTACGAAGAATTGAAGAAGAAGGGTATTCTTTTTCGTTGGTTCTGGTGTCTCCGGTGGTGAGGAAGGTGCC  
CGTTACGGTCCATCTTTGATGCCAGGTGGTTCTGAAGAAGCTTGGCCACATATTAAGAACATCTTCCAATC  
CATCTCTG

AACTAGTGAGGGTTTTGATTACTACAACCTACCGAACCATGGACCGGAACTTTACCTCTACATCCACTGAGA  
TGACTACTGTGACCGGTACCAACGGTCAACCAACTGACGAAACTGTTATTGTCATTAGAACTCCAACCTAGT  
GAGGGTTT

GCCACAGTTATTACAACAGTGGATTCAAGATGAAGAGGGCGGCAAGATCACGATCCCTCTGCCTTTGAAGA  
AACGACACAGATCCCAGCAACACAATGACCAACAACCGCCACAACCACGCACCAAAGAGCTGATCATTCCG  
TCACATAT

CAGTAAGTTTTTCTTCCCTTACCTTCGCCTCTTGAAATAACAAATCCAACCTTTGCCATCAACTTCGACAGCT  
GGGGCACCGTTAGCGCACTTGCTGACATCACACTTGTCAAATGGCAAACCAATGAAGTCACGGAAGTTAAT  
GATAGTAT

TAACGCTTCTACCACCGTCTCTTCTACGATCTCTTCTAGCGCCCCAGACTCAATAATTCCTTCATCTAGCG  
CCTCCATCTCTGGTGTCTCAAACCTCCACTACAGCATCTGGTTCAATCGCTTCTACTGCTTCCACCGCTTCC  
ACTACTTC

TACAGCGAGAGATTATCTCGCTTATCAGCAGAGTACTTTAATAAGAAGTCTTCGACCTCAGTTCCTATCTC  
GGTAGGTGACACACCTACTACCACGCCAGGGTCCATTGAAGCTGCAGGTGTGGTTGCATGGAATGAAATTC  
TATCTCAG

GTCTGAATCACCATCCCCACGTCAATCTACGTATTCTTTGACTGCAGGCAGTCCACCAAATGACCCAAGCA  
CGTTGGCAAGCCCATTTACGATCCCATTCTTCCCAGAAGAACTTCTACTTTTTCTTCATTGCCCCATTCAA  
AAGCAACA

AGACAACATAACCGCTGCTATGATGGGAGGCTTTTTGCGGTTTATTCTTAAGGGACTTGACCCACAAAGAGG  
TGGAAAGACGTGAGATTCCATTGGCTGAGGTGCTTCCAGAACCTTCTGGTGGTGAAGATACCGGTCTGGTT  
CCCCATT

ATGACCACCATCACCGATACTAACGGTCAATTAAGTATGAAACTGTCATTGTCATCAGAACTCCAACAAC  
AGCTAGCACCATCACAACCTACCACCGAGCCATGGACCGGTACTTTACCTCTACATCCACTGAGATGACTA  
CTGTCACC

CCAATTGACAACAACCACCGATATCGAAAATTTCCAGGGTTTTCTGAAATCGTTGAGTGGCAGTGAAGTGA  
TGGAGAGGATGAGGAAACAATCTGCCAAGTTTGGCACTAACATAATTACCGAGACTGTCTCTAAAGTCGAT  
TTATCTTC

AGAACCCTAGGTTCTGATCATCAAAGATCTTTGCGTACCAAATTCATGGGGTTTTATCCACTCGTGTC  
ATTGGTGTGATGGTTCATGATCCACTCTGACAACAAGGGTTTTGGTTATCCACCAAGAGTGTCCAATTC  
ATCCGTTG

GACACACCGGCAAATAAACCTTTGCTTTTGGAAATAGGCCAAAACTGCCGAGACACCACCTGTGGATGCAGA  
AGCTGCAGCTTCTGCACTTCTTCCAAGAGGACCTGCGGAAACTGACACATTACCACCTAAAGTAATTGTAC  
CAAATTCA

GGCCATGCTACAGATGCTTTTATCCAACACCTCCGCCACCAAATGCCGTGACCTCTTGCCAAGAAGGCGGT  
GTGATAGGACCTTGCATTGGACTAGTTGGAACAATGATGGCTGTAGAACTTTGAAGCTTATCCTAGGAAT  
CTACACCA

TTAGAACTCCAACCTAGTGAGGGTTTGATTACTACAACCTACCGAACCATGGACCGGAACTTTACCTCTACA  
TCCACTGAGATGACTACTGTGACCGGTACCAACGGTCAACCAACTGACGAACTGTTATTGTCATTAGAAC  
TCCAATA

TTTGGACTTTGGATGCCTTATACTTCTTGAGATGGAAGGAGCTGATGCTACTGTGGTTGGTGTTCACAA  
TTGTTCACTGTCAACTGATGAGGTCCATCTTCCATACTGAACATGCCCTTGTAATACGATTTGCATAACG  
GCCAACAG

CACTGTCCAGTTTATGGATCCGACTACTTTGCAAACCGCGGATCTGTCACCATCTGTGTACTGGAGGGCTC  
CATTCAACGCCCTGGCTGATGTGACCCAGTTGGTGGAGTTCATTGTTCTGGACGTGGATTCTACAGGTATA  
AGCAGGGG

CAATTGTCTTTGATGTTGAGGATAGCGATGAAGCTGTGACATCAGAGGTGGACAAGCCGACTAAGGAGAAT  
CAGTCGGAGGATGACGATGCCAAGGGTGGATCAACAGGAAAGGAACAACCTGGGTCTTACACGCCTAAAGA  
AGGCACTG

GTAAGGTCATCAAGAGGATTTTGGACTTTGGATGCCTTATACTTCTTGAGATGGAAGGAGCTGATGCTAC  
TGTGGTTGGTGTTCACAAATTGTTCACTGTCAACTGATGAGGTCCATCTTCCATACTGAACATGCCCTTG  
TAAATACG

ATTTTGAGGTTGAACTGTCCCAGTTATATTTGTAACAGGGTTGGCTCCTGCAGTTGCAGGCACATAATAAC  
CCTGTTGTGGTTGCTGTTGTTGCTGTTGCTGTTGCTGTTGCTGTTGTTGCTGTTGTTGGAGATGATTC  
TGAGTGTA

GTAACCTCTGTCAAAATGTTCTTCATCATAAACACGTCTAACGCTTTTTCAGTAGAGCAGCACGGACTTTCAT  
GACTGCAGACAAGGCATCTCCTCTCAAGGCCAAATGACGTTGGTCCAACAGTAAAGAAGGGTCTGAGCCCT  
CTGCGATT

ACAGCATCTGGTTCAATCGCTTCTACTGCTTCCACCGCTTCCACTACTTCTACTGCATCCGCTGCATCCGC  
CACCAGCTTACCTCAGGTTCCGCTTCTGTCTACACTACTACATTAACCTTACTTGAATGCCACAAGTACAG  
TCGTGGTT

CACCCATTTGGTCACGCTTTGGTTGCCGGTATTGAAAGATACCCATTGAAGGTCACCAAGAAGCACGGTGC  
CAAGAAGGTTGCTAAGAGAACCAAGATCAAGCCTTTCATCAAGGTCGTCAACTACAACCATTTATTGCCAA  
CCAGATAC

TACTACAAGCTCAACGTGACTACTTTGGTGCTCACACTTTCAGAGTGTTGCCAGAATGTGCTTCTGACAAC  
TTGCCAGTAGACAAGGATATCCATATCAACTGGACTGGCCACGGTGGTAATGTTTCTTCTCTACATACCA  
AGCTTAAA

CAGTGTGTACGTTTCAAGTAGCTCTATCACGAGTAGTAGTAGTACGAGTATTGTGGACACAACCACAATCT  
CGCCGACTCTGACGTCAACGAGTACGACCCCATTTGACAACCGCCTCAACCAGTACAACACCATCAACTGAT  
ATAACATC

ATTCGTAAAGGCGTTTGTCTCTAGTTTGTGATAGTGTAGATACCGTCCTTGGATAGAGCACTGGAGATGGC  
TGGCTTTAATCTGCTGGAGTACCATGGAACACCGGTGATCATTCTGGTCACTTGGTCTGGGGCAATACCAG  
TCAACATG

TGTCATCAGAACTCCAACAACAGCTAGCACCATCACAACCTACCACCGAGCCATGGACCGGTACTTTACCT  
CTACATCCACTGAGATGACTACTGTACCAGGTACCAACGGTCAACCAACTGACGAACTGTTATTGTCATT  
AGAACTCC

CATTGGTGTACAAAATGCCTATTTCCCAATGTTTGTTCCTCACGTGTGTTGGAAAAGGAAAAGGACCATG  
TTGAAGGCTTTGCTCCAGAAGTTGCCTGGGTACCAGAGCTGGCTCCTCTGAATTGGAAGAACCAATCGCC  
ATTAGACC

GCCTCCATCTCTGGTGTCTCAAACCTCCACTACAGCATCTGGTTCAATCGCTTCTACTGCTTCCACCGCTTC  
CACTACTTCTACTGCATCCGCTGCATCCGCCACCAGCTTACCTCAGGTTCCGCTTCTGTCTACACTACTA  
CATTAACT

CCCCATCGAACTCTCACTTCTATGAGTGTGTCTTCTTCTCCTCCTTCTCCTCCTTCTCCTTCTCCTTCTTC  
TGGGAACAATTCGATAATCTGGATACTCCCTGACTTCCAAGTCCAAGACACAGATATCCCATTGATAGG  
TACATAGA

CTGCACGCCTGCTAGCTTTGTGTTGGTCAACTTAATCAGCTCGTCCAGACTGCCAACTGCTCGTCGATTG  
CCTTTGCCAAAGCGCCGGTGGGTGGTTCACCACCGCCCTGCGACTCTGGAGCCAGGTTTTCCAGAATAGA  
CAGTGGTT

AGATCTGTTTTCTTGGGTCAAATCACAAGGCCTACAGAGAAGAACCAGATTTGGAAAACCTGTTGTTCAA  
CAAGTTCTTCGCTGATGCCGTACCAAGGCTCAATCTGGTTGGAGAAAGTCAATTGCGTTGGCTACCACCT  
ACGGTATC

TGATGTTGAGGATAGCGATGAAGCTGTGACATCAGAGGTGGACAAGCCGACTAAGGAGAATCAGTCGGAGG  
ATGACGATGCCAAGGGTGGATCAACAGGAAAGGAACAACCTGGGTCTTACACGCCTAAAGAAGGCACTGCT  
GGGAACG

ATCATCATCAACTCCAACCACAACATCGTCAGCCCCATTTCTACAAGCACGACGTCGTCAACTTCCA  
CTTCAACAAGTACAACATCGCCAACCTTCTTCTTCAGCACCTACAAGCTCGTCTAATACAACACCAACGAGC  
ACAACGTT

GTATGATAACGTAAGAGTATTTCAGTATCAACGGCAACAACAACAACAACAACAACAACAGCACAAACA  
CAGCACAAACATCGAACGGTTGCTACTGCGACGTTACGGATTATATCCACAGTATATGGCGTGCAGCGA  
TAAGGCTC

CCGACGCAACTGCAACCGTTTTCTCCTCAAATCATAACCACTGTTACTGTTACTCACTGTGACAACAATGGC  
TGTAACACCAAGACTGTCACCTTCTGAATGTTCTAAAGAACTGCAGCAACCACCTTTCTCCTCAAATCATA  
CACTACTG

TCACCGGTACCAACGGTCAACCAACTGACGAACTGTTATTGTTATCAGAACTCCAACCAGTGAAGGTCTA  
ATCAGCACCACCACTGAACCATGGACTGGTACTTTTACCTCTACATCTACTGAGGTTACCACCATCACTGG  
TACCAACG

CGTAGATTCAAACCAACATACGGCAGCTGGTCTATAGTTAAGTTTTCCCATGACATCTCTTTGGGACCTAAA  
GGCCACCGTCATTTGAGGGGACATCGTCGGCCAGACAGATGCTGAAACGGTCTCATTTCAGATCATCGCCAA  
CTGTTCGTA

GAGGATATAGACCAATTTTTGCCTTCGGAAGTATCTTCGTTGGGGTCAGATCACCAGAATGATGGTGAGGA  
TTCAGACACTGACAGTGACAACCTTTTTGCAAGACCCTGAAGACGATGTGGATGAAGAAAGCACTGGTAGAG  
GTACAGTC

CCACCGAAAGTACCGACTCCAACACTAGTGCTACTACCACCGAAAGTACCGACTCCAACACTAGTGCTACT  
ACCACTGCTAGCACCAACTCCAGCACTAATGCCACTACCCTGCTAGCACCAACTCCAGCACTAATGCCAC  
TACCACTG

ACCCAATTCCTGAACCATCATGACCACTGGATCCATCACTTGCATAAACGACAGGGAAGTCGACCGATGTC  
CATGATGCCACGGTACTGTTGTGACTTGTACCAGAGCTGACAACAACCAAACCTTGGATACTAGAACTTAG  
TGATTGAA

GAAAACGTCTCTTCCAACATTGTCAAGAACGCTGAACAACACAACCTTGGTCAAGAAGGGTCCAGTCAGACT  
ACCAACCAAGGTTTTGAAGATCTCCACCAGAAAGACTCCAAATGGTGAAGGTTCTAAGACTTGGGAAACCT  
ACGAAATG

CATCTGTGTACTGGAGGGCTCCATTCAACGCCCTGGCTGATGTGACCCAGTTGGTGGAGTTCATTGTTCTG  
GACGTGGATTCTACAGGTATAAGCAGGGGAAATCGTGTCTTAGCTGACATTACTGTTGCTAGAACGTCTGA  
CTTGGGTG

CTAGTGCTTGCCGTGCTACTGTACGTAAAGAGAAACTCCATCAAGGAACTGCTGATGTCCGATGACGGAGA  
TATCACAGCTGTCAGCTCGGGCAACAGAGACATTGCTCAGGTGGTGACCGAAAACAACAAGAACTACTTGG  
TGTTGTAT

GCGGTCATATTCTTCCCTGGTTGAAGAGGGGGAACTCTGCCACCATGGATGCACACGTATTTGGATCATCTT  
CGTCGCTGTTGTACTGTGAGCTCTTGTGTTGTGCTATGTTCTCGGTGCCCTTCATGGTTTTGTATCTCCCAG  
AGGAGAAA

CACCTCCATTTTACCACAATAGACTGCTCGCTGGCGTTGACCTGCTCTGAGGCATCAAAAAACTCCTCAT  
CGTCGTCGTCTTCGTCTGACGATGTCTCGTCCTCGCCAGCTCCAGTGGTCGTCTTAGCATTTCCATCTTGC  
TTGTGCAA

GAATTAGTGTTTCGGCCAGACATTCACCGATCATATGTTGACCATTCCCTTGGTCAGCCAAAGAAGGGTGGGG  
CACTCCACACATCAAGCCTTACGGTAATCTTTCTCTTGACCCATCTGCTTGTGTATTCCATTATGCATTTG  
AATTATTT

TCTTCCCTGGTTGAAGAGGGGGAACTCTGCCACCATGGATGCACACGTATTTGGATCATCTTCGTCGCTGTT  
GTACTGTGAGCTCTTGTGTTGTGCTATGTTCTCGGTGCCCTTCATGGTTTTGTATCTCCCAGAGGAGAAAA  
CGTCACTC

GTTCAAAGCATACTTTAATCTGTTTCTTAGAAAGACAATCAATGGCAAGGATTCACGCAATTTGTGTGGAC  
CAGCAGATGGTCTTGGGGCGTAACAACCGGACAACCTTGTCCAATAACCAATGGTGTGGAGCTGCTAATCTC  
TTTAGATG

TCTTGCTGCTATTCAAGGTCTGTGTACATGTCTGGACACACTGTGTGCGCAGGCATACGGTGCCAAAAACT  
ACCACTTGGTGGGTGTGCTAGTGCAGAGATGTGCTGTGATCACCATCTTGGCGTTCTTGCCAATGATGTAT  
GTTTGGTT

TCTAGAAGATTACCAAGAACCACGTTATTTGAGAGAGGATGGCAAGGTGACGACAATCACACCAAGACCAC  
ATTTTGGGTGCGCCTGGAAGCAAGACCTGAGAACTGGGCAAAATATTTCAAACCAAGCATAAGATAGTTG  
GAGGTAGG

GTGATCGTTCCAGCGAGATGCTTCTAAACAAAGAAGTATCATAGGATCCCACGTGCAACGTCCACCGTCT  
CAAACAACCTTAGGAAGGTCAAGGGCTGGAAGCAATACAATGAATAAAGTTTCAGGCTTAGATATTGCTCG  
AAGACCAA

TCAATCACGGTATTCAAATAGCAATGTTTACAATACATTAGCGTCTTCGAGTGGATCTCTTCCCACAGAAT  
CTGCTCTGCTTTTGAACAAAGACCACCTTCAGTTTTGAGATACAACACAGATAATTTGAAGTCTAAGTTT  
CATTATTT

TATGTGTTGCGTTGCAACAATATTAGAACTTCCCCTCCGGAACCAAAGTTCACGTCTCCAACCCAATCCC  
ACTTGGCCGTGGATTGGGTTCTCTGGTGCAGCAGTTGTGGCAGGTGTTATTTTAGGTAACGAAGTGGCCC  
AATTGGGT

TACGTACCAAAGAAGTGTATATAAAAGTGATATAACTATGTCAGAGGATCTTTCACCTACAAGCAGCAGGGT  
GGATTTGAGCAATCCTCATGGGTTTACCAAAGAGGGAGTGGATTTATCGAAGCTGTCACCACAAGAATAA  
AATTGTAT

CATCCAAAGATCTTTGCGTACCAAATTCATGGGGTTTATCCACTCGTGTGTCATTGGTGTGTCATGGTCATGAT  
CCACTCTGACAACAAGGGTTTGGTTATCCCACCAAGAGTGTCCAATTCCAATCCGTTGTCATTCCAGTGG  
GCATCACA

CTTCTACGATCTCTTCTAGCGCCCCAGACTCAATAATTCCTTCATCTAGCGCCTCCATCTCTGGTGTCTCA  
AACTCCACTACAGCATCTGGTTCAATCGCTTCTACTGCTTCCACCGCTTCCACTACTTCTACTGCATCCGC  
TGCATCCG

TCATCCTTATTCAAGTCACCGGCATCAACTTCACCTTCTTCGTGTCATCTTCTTCTGCTGCGGGCCTTGACACT  
GCCTTCTGCGGGCGCTTGCATGTGAGCTTGGATGTCTTCTGGGGACTTGGTAGCGACGTCTTCGTTAGATG  
GCATAATA

CCACCAAGGTTAAGCAATTGGAAAACGTCTCTTCCAACATTGTCAAGAACGCTGAACAACACAACCTTGGTC  
AAGAAGGGTCCAGTCAGACTACCAACCAAGGTTTTGAAGATCTCCACCAGAAAGACTCCAAATGGTGAAGG  
TTCTAAGA

TGTACAGAACAAGAACTAAAGACTGCAGATGGCAATAATACCCAGTCACGAAAGGTGTGCTGCTACACG  
AATCCATCCACAGCGTGGAGGATGCGTATGGAAAATTGCCTGAGGACGCCTTGGCGTTTCTTAAGGAAAAC  
AGTGCGGA

GTGGTATGGTTGAGTGGGGCAGGGTAACGAGTGGGGAGGTAGGGTAATGTGAGGGTAGGTTAAGAGACAGG  
TTAGATAGGGTGGTGTGTGGTGTGTGGTGTGGTGTGGTGTGGTGTGGTGTGGTGTGGTGTGGTGTGGTGT  
GTGTGGGT

TTGCGCTAACGAAACCACATGGATCCTCCACACAACCACTTAGTTTTGGCAAATCCCAAGACCAAGAGGAAC  
TTTCTCACCATTTCGGGGCAGGTGACGAAGCAAGAGCGAAGCTGGATTCTACGCTGGATTAGTGAAGCGCC  
AGCGAGGA

ATTCAACAATGTAAAGGTCATCAAGAGGATTTTGGACTTTGGATGCCTTATACTTCTTGAGATGGAAGGAG  
CTGATGCTACTGTGGTTGGTGTTCACAATTGTTCACTGTCAACTGATGAGGTCCATCTTCCATACTGAA  
CATGCCCT

ACTTGTACCAAGCAGATGCTTCCCAAGCTTCGAAGGGCGTTTCCCCACTATACTCTTCGCTGCAAGCGTGG  
GTGTGTGCCTTTTCCCACTGGAAACCAAGGAATGATCAATGTCGATACCAAGACATTGAGGAACATGAGT  
CCTTTGAC

AGATTTCTAACACTGTCCAGTTTATGGATCCGACTACTTTGCAAACCGCGGATCTGTCCACATCTGTGTAC  
TGGAGGGCTCCATTCAACGCCCTGGCTGATGTGACCCAGTTGGTGGAGTTCATTGTTCTGGACGTGGATTCC  
TACAGGTA

TCACCGATACTAACGGTCAATTAAGTATGAAACTGTCATTGTGTCATCAGAAGTCCAACAACAGCTAGCACC  
ATCACAACCTACCACCGAGCCATGGACCGGTACTTTACCTCTACATCCACTGAGATGACTACTGTCCACGG  
TACCAACG

GACTCCAACACTAGTGCTACTACCACTGCTAGCACCAACTCCAGCACTAATGCCACTACCACTGCTAGCAC  
CAACTCCAGCACTAATGCCACTACCACTGAAAGTACCAACGCTAGTGCCAAGGAGGACGCCAATAAAGATG  
GCAATGCT

TCACCTTCTTCGTGTCATCTTCTTCTGCTGCGGGCCTTGACACTGCCTTCTGCGGGCGCTTGCATGTGAGCTTG  
GATGTCTTCTGGGGACTTGGTAGCGACGTCTTCGTTAGATGGCATAATACCGCTAGCTTGAGCTTGTGTGT  
GAGCAGCG

CAGCTTTGAAGCTGAAGTTTTGCAGAACACCGCTATTCTCCATCTATGATCAGTCCACGTCTCCATATCTC  
TTGCACTGTTTTCGAACTGTTGAACTTGACCTCCAGATCGTTTGCTGCTGTGATCAGAGAGCTGCATCCAGA  
ATTGAGAA

CCGCCATGGAACCTTGATGTTTTGTTGGATAGCAATCATTTTTCTTGCGTTTTGCGGGAGAGGGCTCCTTGGC  
CAGAAGATCTGAGAGTTCTTGGAATTGGTCAACAGCAGTGTGAAATCCGTTACATAAGTTTGATGGTGTG  
TGGTGTAA

CTCTGTCATTTCTTCTTCTACAACAACCTCCACTTCTATATTCTCTGAATCATCTACATCATCCGTCATTC  
CAACCAGTAGTTCCACCTCTGGTTCTTCTGAGAGCAAAACGAGTTCGGCTAGTTCTTCTCTTCTTCTCT  
TCTATCTC

ATTGGTAAATCAGCCATGTGTCCACAGTGCCGAACATCAGGTCGTTCTCCTCATACGCCTTGGTACACAGA  
GGCTCATTGTGCGAGGAACCAGCGCAGCTTGGAACAGGAGAAATACGTGGAGAGCAATGGCAATCCAGTCTT  
CTGTCTAA

TTTTGTCCATTGAAACCACCTCTGGCGCCGCCTCTACCTCTGAAGTTCCTCTGCCTCTGAAACCTCCTCT  
GTAGCCGCCTCTGAAACCTCCTCTAAAACCTCCTCTGCCTCTGAAACCGCTCTGCCTCTGAAACCTCCTC  
TTTGCATT

TTCGACCTCAGTTCCTATCTCGGTAGGTGACACACCTACTACCACGCCAGGGTCCATTGAAGCTGCAGGTG  
TGGTTGCATGGAATGAAATTCTATCTCAGACTGATATGATTTCCAAGGATCATGATCAGTTATCAACCGAC  
TTTGAAAA

AAACTGTTATTGTTATCAGAACTCCAACCAGTGAAGGTCTAATCAGCACCACCACTGAACCATGGACTGGT  
ACTTTACCTCTACATCTACTGAGGTTACCACCATCACTGGTACCAACGGTCAACCAACTGACGAAACCGT  
GATTGTCA

TGTTATCAGAACTCCAACCAGTGAAGGTCTAATCAGCACCACCACTGAACCATGGACTGGTACTTTACCT  
CTACATCTACTGAGGTTACCACCATCACTGGTACCAACGGTCAACCAACTGACGAAACCGTGATTGTCTAT  
AGAACTCC

ACACGTCTAACGCTTTTTCAGTAGAGCAGCACGGACTTTCATGACTGCAGACAAGGCATCTCCTCTCAAGGC  
CAAATGACGTTGGTCCAACAGTAAAGAAGGGTCTGAGCCCTCTGCGATTTTGTGGTAAAGGAGTCTTAC  
CACCGGGG

CGGTGAATGTACCACCTTCTTCATTAACAATTTTATAACGCTGGTTGGGAAGATTGGATATCCCTACAGGA  
GGAGGAACAGGGGCAGCAGTGCAGTGGCAGCACTCATTATTTGATACAATATGTGATGTAGTTTCGTTATC  
AATACTCT

AATGCGACTACCAACTCCAGCACTAATGCTACTACCACTGCCAGCATCAACGTCAGGACTAGTGCGACTAC  
CACTGCCAGCATCAACGTCAGGACTAGTGCGACTACCACTGAAAGTACCAACTCCAACACTAATGCTACTA  
CCTACTGAA

GGTGGTGCCAAGACTGGTTCTGGTAAAACCTATTGCATTTGCAGGGCCTATGCTGACTAAATGGTCCGAAGA  
TCCGTCAGGGATGTTTGGAGTGGTCTTGACCCCAACCAGAGAGTTAGCCATGCAAATTGCCGAACAATTTA  
CTGCACTT

ATCCACTGAGATGACCACCATCACCGATACTAACGGTCAATTAAGTATGAAACTGTCATTGTCATCAGAA  
CTCCAACAACAGCTAGCACCATCACAACCTACCACCGAGCCATGGACCGGTACTTTACCTCTACATCCACT  
GAGATGAC

ATCTACTGAGATGACTACTGTACCAGGTACCAACGGTCAACCAACTGACGAAACTGTTATTGTTATCAGAA  
CTCCAACCAGTGAAGGTCTAATCAGCACCACCACTGAACCATGGACTGGTACTTTACCTCTACATCTACT  
GAGGTTAC

TCCGGTGTACGTGAAACTTTACGTTATTTGGTGCAACACAAAATGGTTGATGCTGTCGTTACTTCTGCTGG  
TGGTGTGGAAGAAGATTTGATCAAATGTCTTGCTCCAACCTACTTGGGTGAATTTGCTTTGAAAGGTAAAT  
CTTTGCGT

ACAGAGGCTGACCTACCAGAGGGCTACGAGGTGCTACACCAGGAACCCCGCCCACTTGAGCATAACGAGTAC  
ACTGAACAAGTTTATTGACAATGCAAGGGAGGAGGAAGACGCTGAAGAGGACTCTCAACCGACAGAAGAAC  
CTGTACAG

TAATGAATCTAAATTTAGAGCACGTTGTAAATTGTGAGTAACATATTGCTCCCAAACCTTCCATTCTGGTT  
GAAACTTGTTGCAAGAGTACCAAGACATCCAAGTGGCAAACCTTCATTCAACCATAAGCCTTCCCACCAA  
TCCATGGT

AGCTACTATGGCAATGGCATCAAAACATATCCCTTGCCATCTTCACCGAAATCGCCGACATCAGAAGAAAC  
ACACTCATCTATGACAGCATCTGGAGAGGACTCACACCTACTTAAGCAATAGATTGTGCTATCTGGGACAG  
TAACAATG

TGTCAAGAACGCTGAACAACACAACCTTGGTCAAGAAGGGTCCAGTCAGACTACCAACCAAGGTTTTGAAGA  
TCTCCACCAGAAAGACTCCAAATGGTGAAGGTTCTAAGACTTGGGAAACCTACGAAATGAGAATCCACAAG  
AGATACAT

AGCACCAACTCCAGCACTAATGCCACTACCACTGCTAGCACCAACTCCAGCACTAATGCCACTACCACTGA  
AAGTACCAACGCTAGTGCCAAGGAGGACGCCAATAAAGATGGCAATGCTGAGGATAATAGATTCCATCCAG  
TCACCGAC

ATGGAAAGTGTCTAGAAGATTACCAAGAACCACGTTATTTGAGAGAGGATGGCAAGGTGACGACAATCACA  
CCAAGACCACATTTTGGGTGCGCCTGGAAGCAAGACCTGAGAAACTGGGCCAAAATATTCAAACCAAGCAT  
AAGATAGT

TTTGGGTGCTGTTTCCAGGAGTTCTTAAAGCAGCAGAAGGTTGTTGTTGTGGTTGATAACGAGCGCCAAACTG  
CTGAGATTGAGTTTGGCCTTGAGGCTGAGATGGAGGTTGGCCTGTTGCACGTAGCTGTTGCTGTTGCTGTT  
GCTGCTGT

TTAGCTGACATGTACCACTCCTTGATGAAGAGATACCCAATTGTCTCCATCGAAGATCCATTTGCTGAAGA  
TGACTGGGAAGCTTGGTCTCACTTCTTCAAGACCGCTGGTATCCAATTGTTGCTGATGACTTGACTGTCA  
CCAACCCA

ACTCCAACAGTGAAGGTCTAATCAGCACCACCACTGAACCATGGACTGGTACTTTACCTCTACATCTAC  
TGAGGTTACCACCATCACTGGTACCAACGGTCAACCAACTGACGAAACCGTGATTGTATTAGAACTCCAA  
CTAGTGAG

TCGTCGCTGTTGTACTGTGAGCTCTTGTGTTGTGCTATGTTCTCGGTGCCCTTCATGGTTTTGTATCTCCA  
GAGGAGAAAATCGTCACTCAAGTTAAACACGACCTTGCCGATGTTTGCCTTGAATCTAATTTGCTTGCTGA  
GGTCTATT

TCTAGTGGATGAAAGAAGCAGCACGAACACCATTTCTACAGACAACGACACATGGAAAGGTTCCACCATTC  
CAAAGAAAACAACGATGGCCACAAGGGTGTGGTCTCCATTCTCCTACTGTTGGAAGGAGATATTATCCGA  
CCGACTGT

CAACAACCTCCACTTCTATATTCTCTGAATCATCTACATCATCCGTCATTCCAACAGTAGTTCCACCTCT  
GGTTCTTCTGAGAGCAAAACGAGTTCGGCTAGTTCTTCTCTTCTTCTTCTTCTATCTCTTCTGAATCACC  
AAAGTCTC

CATTGCAATTCCACCAGAAGTACTTCCGATGAGGATAGTTTGCCAGCAGAAAGCGAGGATGAATCCGTAG  
CGGGTGGAGGAAAGGAGGAGGAAGAGCCTGATCTCATTGATGCTCAAGAAATATATGATTTGATAGCTCAT  
ATTTCCGA

TTAACTGATGAAACTGTCATTGTCATCAGAACTCCAACAACAGCTAGCACCATCACAACCTACCACCGAGCC  
ATGGACCGGTACTTTTACCTCTACATCCACTGAGATGACTACTGTCACCGGTACCAACGGTCAACCAACTG  
ACGAAACT

ACCTACCAGAGGGCTACGAGGTGCTACACCAGGAACCCCGCCCACTTGAGCATAACGAGTACACTGAACAAG  
TTTATTGACAATGCAAGGGAGGAGGAAGACGCTGAAGAGGACTCTCAACCGACAGAAGAACCTGTACAGAA  
GGAAACAC

CACACGTATTTGGATCATCTTCGTCGCTGTTGTACTGTGAGCTCTTGTGTTGTGCTATGTTCTCGGTGCCCC  
TTCATGGTTTGTATCTCCAGAGGAGAAAATCGTCACTCAAGTTAAACACGACCTTGCCGATGTTTGCCTT  
GAATCTAA

TACCGTCCTTGGATAGAGCACTGGAGATGGCTGGCTTTAATCTGCTGGAGTACCATGGAACACCGGTGATC  
ATTCTGGTCACTTGGTCTGGGGCAATACCAGTCAACATGGTGGTGAAGTCACCGTAGTTGAAAACGGCTTC  
AGCAACTT

AGAATCCACAAGAGATACATCGACTTGGAAAGCTCCTGTTCAAATCGTTAAGAGAATCACTCAAATCACCAT  
TGAACCTGGTGTGGATGTGCAAGTTGTTGTTGCTTCCAATAAGCTGGTTCTAACTGGAAATAATTTCCAT  
TAGATTCC

TGAGCTAGGCCGAGAAAGCTGGGAATATTTAACCCCTCAGCAAGCCGCAAACGACCCACCATCCACTTTCA  
CGCAGTGGCTTCTTCAAGATCCCAAATTTCTCAACCTCATCCAGAAAGAAATAAGCATTACCAGATTTT  
TCAGCCTT

TTGTCTTCTGTCTTAAACACGAAAAGCTTAGGTTCCGTGGCATCGCTCTTCTGTTGAGATGCGAACAAAGC  
ATATGCTGGGGTTTTGAATGGATGGTCTTGTGAACCGCTGTGGTCAATTCTGTCTACACCGGTAGCCTCCT  
TAATGTAC

CAAAATGCCTATTTCCCAATGTTTGTTCCTCACGTGTGTTGGAAAAGGAAAAGGACCATGTTGAAGGCTT  
TGCTCCAGAAGTTGCCTGGGTACCAGAGCTGGCTCCTCTGAATTGGAAGAACCAATCGCCATTAGACCAA  
CTTCTGAA

GTTATTGGAACAGCGCTATTTTACATTCTGGACGAGAGAAGTCGCAGTGGTGTGTTTTGGTGAACCTCAAG  
GAAAGCCTTACATGAACCAATGGTTGGGTGACCAGCAAATGGCAATTCATTCTTGGAGTAAAGATCCTCA  
ACTTGTA

TCTCGCAAGTGCATTCTAGACTTAATTCATATCTGCTCCTCAACTGTCGATGATGCCTGCTAAACTGCAG  
CTTGACGTACTGCGGACCCTGCAGTCCAGCGCTCGTCATGGAACGCAAACGCTGAAAACTCCAACCTTCT  
CGAGCGCT

GATCTCAGGCCGATCTGACAATCTTTAAAGGCATCAACAAGAGCAGCAGCTTGCCGACGTGGCAAAAAGTCA  
AAGAAGAACAGAGGCAACTCGTCCTACGTGAAGCCACATACAACAAGTTAGGAACCTATTAGGCGGAACCGC  
TTTCTAAG

GGTGTATATGGTTTTCCACAGATCTGGTGAACCTGAAGACACTTTCATTGCTGACTTGGTTGTGCGTTTTGAG  
AACTGGTCAAATCAAGACTGGTGTCCAGCTAGATCCGAAAGATTGGCTAAGTTGAACCAATTGTTGAGAA  
TCGAAGAA

ATCAGAGGTGGACAAGCCGACTAAGGAGAATCAGTCGGAGGATGACGATGCCAAGGGTGGATCAACAGGAA  
AGGAACAACCTGGGTCTTACACGCCTAAAGAAGGCACTGCTGGGGAACGTGAGAATGAGAATGAAAGCAAC  
GTTAAGCC

GTCAAATTGTAATATCCCTGATCCTTCAATACATACTACTAGCACTATCACAACCTACCACCGAGCCATGGA  
CCGGTACTTTCACTTCTACATCCACTGAGATGACCACCATCACCAGATACTAACGGTCAATTAACCTGATGAA  
ACTGTCAT



AGACGATGTGGATGAAGAAAGCACTGGTAGAGGTACAGTCACTACCACTTCCACATCCACTGAGTCAAGAG  
GCCGTCCATCTTCTTGTATCTTCGTGGCAAGCTTAGCAGCAGCCCTATCCGATGACGAATTATGTCTGTCTG  
GTGACTGA

GGCTCCTTGGCCAGAAGATCTGAGAGTTCTTGGAAATTGGTCAACAGCAGTGTGGAATCCGTTACATAAGT  
TTGATGGTGTCTGGTGTAAATGCAATTCGTTGATTTGACCGGAGATATAAGGTTCCAATGCACCGAAGTCC  
ACTTCAAG

ACCATGGATGCACACGTATTTGGATCATCTTCGTCGCTGTTGTACTGTGAGCTCTTGTTTGTGCTATGTTT  
TCGGTGCCCCCTTCATGGTTTGTATCTCCAGAGGAGAAAATCGTCACTCAAGTTAAACACGACCTTGCCGA  
TGTTTGCC

AGTTTTCTCTCGTACTCTTCATACATTCGTTTCATTTCAATATCTCTGTCTGCGTCAAGATCACCACCATA  
CTCCAAATCAGAGTCGCTGTCTTCTTCTTCTTCATCATCATCATCCTCATCATCATCTTCATCATCAT  
CCTCATCG

AAATTATCCTGATGTGAGTTTTCCGGTGATGGGGGTGCCGCAGTGTGATGAACGCCTGAGACAGGAACTT  
TGAGTCCAGTACTTCAGAGACCAGATGTTTGTCTTCAGCGGCCACATATATGCCAGACCATATGCTTTGA  
AAGTGATC

CAATAGCACCTCCTCCGCAGACTTGAGTTCTATCACTTCCGTCTCGTCAGCTAGTGAAGTGCCACCGCTT  
CCGACTCACTTTCTTCCAGTGACGGTACCGTTTATTTGCCATCCACAACAATTAGCGGTGATCTCACAGTT  
ACTGGTAA

TGAAAGTTTGAATAACAACGCAGAGGGTGAAGACATAATCAGAAATGAAGAAGTCGAAGATGAGATCAAAT  
CATCACTTGGCAACCACAAGTCAAGCCAGTACGCAAATGCGTTGATTTCGAAATAATCAAGAGGGAATTA  
AGATCAAG

CGCAAGCTGATCTCGCAAGTGCATTCCTAGACTTAATTCATATCTGCTCCTCAACTGTGATGATGCCTGC  
TAAACTGCAGCTTGACGTACTGCGGACCCTGCAGTCCAGCGCTCGTCATGGAACGCAAACGCTGAAAACT  
CCAACCTT

CGGAAGGAATGTATCCTCATTTACCGATGATGGCACCATCGGATTATCCAGTTCTTCGATTTTCGTATCCAG  
GCGGTGGTGGTGGTGGTGGTGAAGTGCTAAGTCGCTGTCTCTTCAAACCCAGGAGGTGGGGGCGGTAGT  
CCACTCAT

TGAAGAGGGGGAACCTCTGCCACCATGGATGCACACGTATTTGGATCATCTTCGTCGCTGTTGTACTGTGAG  
CTCTTGTGTTGTGCTATGTTCTCGGTGCCCTTCATGGTTTGTATCTCCAGAGGAGAAAATCGTCACTCAA  
GTTAAACA

AAATGTTAGGCTCAGCAATCAAGTGAGATTGAGAAATTTACTGGGTGGCTCTGATTTTGGTGTCTGTTGAC  
ACATTTGATTGTGTACCTCCCTGTTGAGGCGATCAGCATCTGAAAAATCTTTTGGTGCAGGTGATGGAGC  
GGAAGCTA

CAGGCCAAGTGCTGGTGACGAAGATTCTGCTCATCCTGATAAGAACAAGAAATTTTCGATGCCTACTCCGG  
ATTCCAATACTTTGGTGGTCCAGTCAGAAGAAGGTGGAGCTCATTCACTTGAGGTAGATACCAATCGAAGG  
TCCGATAA

CATTTGAGGGGACATCGTCGGCCAGACAGATGCTGAAACGGTCTCATTTCAGATCATCGCCAACCTGTCGTAG  
TAGAGTCAACAGCAGTAACCCACGTTTCGAGTGAGGACCATATGATAAATAGGTATATGAGTATCCACATA  
CCGTGTCT

TCTAATAGACGTTACGAAGAATTGAAGAAGAAGGGTATTCTTTTTCGTTGGTTCTGGTGTCTCCGGTGGTGA  
GGAAGGTGCCGTTACGGTCCATCTTTGATGCCAGGTGGTTCTGAAGAAGCTTGGCCACATATTAAGAACA  
TCTTCCAA

TCGCATTGGTACTGGCGTTAGTACTGGCATTAGCACTACCATGAATGCACGTGTCGCTGTCCTCATCACTG  
CTGCAATACTTTCTGTACCTGTCACTGCTATTGCTCTCTCTGGAAGCTAGACGGTAACGCAACGATCGACAT  
GGAAGCTG

TCGATCGAATTTGAAACTATGTCCTGTTGCTTTAAAGGTGGTAGAACAACATCGTGGGTGAGAGAGGATGG  
CTCGTTCAAGTCAATTGATAGATCCTTACTGGACAGGTTTCATTGCCGCATACTTCAAACACAATCACCGTC  
TATTTCCC

ATACATTCTGAACAGGTTGAGTTGGTTGAACAGGTTGAGTTGGCTGAACAGGTTGAGTTGGCTGAACAGGT  
TGAGTTGGCTGAACAGGTTGAGTTGGTTGAACAGGTTGTGTTGATTGAACAGGTTGAGTTGGTTGAGCGAC  
TTCCACAT

AGATTGACTGACAGAGCTTGATACATCAGAAACGGATGAAGAGGATTGGCTGACAGAGCTTGAGACAACAG  
AGGAAGAGGATGGACCGACAGAGCTCGAGACACCAGAAGTGGATGAAGCTGATTGTGTGATAGAACTTAAG  
ATATCGGT

AGAGCTTGAGACATCAGAAGTAGAGGAAGCTGATTGACTGACAGAGCTTGAGACATCAGAAGCTGAGGAAG  
CTGATTGACTGACAGAGCTTGAGACATCAGAAGCTGAGGAAGAAGATTGACTGACAGAGCTTGATACATCA  
GAAGCTGA

TAGAGGAAGCTGATTGACTGACAGAGCTTGAGACATCAGAAGCTGAGGAAGCTGATTGACTGACAGAGCTT  
GAGACATCAGAAGCTGAGGAAGAAGATTGACTGACAGAGCTTGATACATCAGAAGCTGAAGAAGAAGATTG  
ACTGACAG

ACAGAGCTTGATACATCAGAAACGGATGAAGAGGATTGGCTGACAGAGCTTGAGACAACAGAGGAAGAGGA  
TGGACCGACAGAGCTCGAGACACCAGAAGTGGATGAAGCTGATTGTGTGATAGAACTTAAGATATCGGTAG  
CGGACGAG

ATTGACTGACAGAGCTTGAGACATCAGAAGTAGAGGAAGCTGATTGACTGACAGAGCTTGAGACATCAGAA  
GCTGAGGAAGCTGATTGACTGACAGAGCTTGAGACATCAGAAGCTGAGGAAGAAGATTGACTGACAGAGCT  
TGATACAT

TTTGCATTATATACATTCTGAACAGGTTGAGTTGGTTGAACAGGTTGAGTTGGCTGAACAGGTTGAGTTGG  
CTGAACAGGTTGAGTTGGCTGAACAGGTTGAGTTGGTTGAACAGGTTGTGTTGATTGAACAGGTTGAGTTG  
GTTGAGCG

GTAGAGCTGGATGGAGTTGGTACTGGAGCAGAAGAGCTTTCAGTGGTAGAGCTGGTTACTGGAGCAGAAGA  
GCTTTCAGTGGTGGAGCTTGATGGGGTTGGAGCTGGAGCAGAAGAGCTTTCAGTAGTAGAGCTGGATGGAG  
TTGGTACT

ACATCAGAAGTAGAGGAAGCTGATTGACTGACAGAGCTTGAGACATCAGAAGCTGAGGAAGCTGATTGACT  
GACAGAGCTTGAGACATCAGAAGCTGAGGAAGAAGATTGACTGACAGAGCTTGATACATCAGAAGCTGAAG  
AAGAAGAT

CCAGAGCTTGAGACACCAGAAGTAGAGGAAGCTGATTGACTGACAGAGCTTGAGACATCAGAAGTAGAGGA  
AGCTGATTGACTGACAGAGCTTGAGACATCAGAAGCTGAGGAAGAAGATTGACTGACAGAGCTTGATACAT  
CAGAAGCT

CTGAAGAAGAAGATTGACTGACAGAGCTTGATACATCAGAAACGGATGAAGAGGATTGGCTGACAGAGCTT  
GAGACAACAGAGGAAGAGGATGGACCGACAGAGCTCGAGACACCAGAAGTGGATGAAGCTGATTGTGTGAT  
AGAACTTA

ACTGACAGAGCTTGATACATCAGAAGCTGAAGAAGAAGATTGACTGACAGAGCTTGAGACATCAGAAGTAG  
AGGAAGCTGATTGACTGACAGAGCTTGAGACATCAGAAGCTGAAGAAGAAGATTGACTGACAGAGCTTGAT  
ACATCAGA

ATGGAGTTGGTACTGGAGCAGAAGAGCTTTCAGTGGTAGAGCTGGTTACTGGAGCAGAAGAGCTTTCAGTG  
GTGGAGCTTGATGGGGTTGGAGCTGGAGCAGAAGAGCTTTCAGTAGTAGAGCTGGATGGAGTTGGTACTGG  
AGCAGAAG

TGACTGACAGAGCTTGATACATCAGAAGCTGAAGAAGAAGATTGACTGACAGAGCTTGAGACATCAGAAGT  
AGAGGAAGCTGATTGACTGACAGAGCTTGAGACATCAGAAGCTGAGGAAGCTGATTGACTGACAGAGCTTG  
AGACATCA

GAAGAAGAAGATTGACTGACAGAGCTTGAGACATCAGAAGTAGAGGAAGCTGATTGACTGACAGAGCTTGA  
GACATCAGAAGCTGAGGAAGCTGATTGACTGACAGAGCTTGAGACATCAGAAGCTGAGGAAGAAGATTGAC  
TGACAGAG

TCTTCTTCTGCTTCTGAATCCTCTTCAGCTGCCTCCTCTTCTGCTTCTGAATCCTCTTCAGCTGCTTCTTC  
CTCTGCTTTCAGAATCTTCTTCTGCTGCCTCCTCTTCTGCTTCTGAAGCTGCTAAGTCTTCTAGCTCTGCCA  
AGTCTTCT

AGCTTGATACATCAGAAGCTGAAGAAGAAGATTGACTGACAGAGCTTGAGACATCAGAAGTAGAGGAAGCT  
GATTGACTGACAGAGCTTGAGACATCAGAAGCTGAGGAAGCTGATTGACTGACAGAGCTTGAGACATCAGA  
AGCTGAGG

ATCAGAAGCTGAAGAAGAAGATTGACTGACAGAGCTTGAGACATCAGAAGTAGAGGAAGCTGATTGACTGA  
CAGAGCTTGAGACATCAGAAGCTGAGGAAGCTGATTGACTGACAGAGCTTGAGACATCAGAAGCTGAGGAA  
GAAGATTG

TCTGCTGCCTCCTCTTCTGCTTCTGAAGCTGCTAAGTCTTCTAGCTCTGCCAAGTCTTCTGGCTCTTCTGC  
TGCTTCATCTGCTGCTTCATCTGCTTCTTCCAAGGCCTCTTCTGCAGCTTCTTCTGCAAAGGCCTCCT  
CTTCTGCA

CTTCATCATCGGATTCTTGCTTTGCATTATATACATTCTGAACAGGTTGAGTTGGTTGAACAGGTTGAGTT  
GGCTGAACAGGTTGAGTTGGCTGAACAGGTTGAGTTGGCTGAACAGGTTGAGTTGGTTGAACAGGTTGTGT  
TGATTGAA

GGATTCTTGCTTTGCATTATATACATTCTGAACAGGTTGAGTTGGTTGAACAGGTTGAGTTGGCTGAACAG  
GTTGAGTTGGCTGAACAGGTTGAGTTGGCTGAACAGGTTGAGTTGGTTGAACAGGTTGTGTTGATTGAACA  
GGTTGAGT

ATACATCAGAAACGGATGAAGAGGATTGGCTGACAGAGCTTGAGACAACAGAGGAAGAGGATGGACCGACA  
GAGCTCGAGACACCAGAAGTGGATGAAGCTGATTGTGTGATAGAACTTAAGATATCGGTAGCGGACGAGGA  
TGTCTCAG

TGATTGGCTGCCAGAGCTTGAGACACCAGAAGTAGAGGAAGCTGATTGACTGACAGAGCTTGAGACATCAG  
AAGTAGAGGAAGCTGATTGACTGACAGAGCTTGAGACATCAGAAGCTGAGGAAGAAGATTGACTGACAGAG  
CTTGATAC

TTCAGCTGCTTCTTCTTCTGCTTCTGAATCCTCTTCAGCTGCCTCCTCTTCTGCTTCTGAATCCTCTTCAG  
CTGCTTCTTCTTCTGCTTTCAGAATCTTCTTCTGCTGCCTCCTCTTCTGCTTCTGAAGCTGCTAAGTCTTCT  
AGCTCTGC

TGAGCTTGAGCTACCAGAAGCGGATGAGACTGATTGGCTGCCAGAGCTTGAGACACCAGAAGTAGAGGAAG  
CTGATTGACTGACAGAGCTTGAGACATCAGAAGTAGAGGAAGCTGATTGACTGACAGAGCTTGAGACATCA  
GAAGCTGA

CGAATCTGGTTCCGAATCTGCCACTGCTTCTCAGACGCTTCTTCTGCTTCTGAATCCTCTTCAGCTGCTT  
CTTCTTCTGCTTCTGAATCCTCTTCAGCTGCCTCCTCTTCTGCTTCTGAATCCTCTTCAGCTGCTTCTTCT  
TCTGCTTC

CTGAATCCTCTTCAGCTGCTTCTTCTTCTGCTTCTGAATCCTCTTCAGCTGCCTCCTCTTCTGCTTCTGAA  
TCCTCTTCAGCTGCTTCTTCTCTGCTTCTCAGAATCTTCTTCTGCTGCCTCCTCTTCTGCTTCTGAAGCTGC  
TAAGTCTT

CTCAGACGCTTCTTCTGCTTCTGAATCCTCTTCAGCTGCTTCTTCTTCTGCTTCTGAATCCTCTTCAGCTG  
CCTCCTCTTCTGCTTCTGAATCCTCTTCAGCTGCTTCTTCTCTGCTTCTCAGAATCTTCTTCTGCTGCCTCC  
TCTTCTGC

AAGAGCTTTTCAGTAGTAGAGCTTGATGGAGTTGGTACTGGAGCAGAAGAGCTTTTCAGTAGTAGAGCTTGAT  
GGAGTTGGCACTGGAGCAGAAGAGCTTTTCAGTGGTGGAGCTGGTACTGGAGTAGAAGAGCTTTTCAGTAGT  
AGAGCTGG

ATCCTCTTCAGCTGCTTCTTCTCTGCTTCTCAGAATCTTCTTCTGCTGCCTCCTCTTCTGCTTCTGAAGCTG  
CTAAGTCTTCTAGCTCTGCCAAGTCTTCTGGCTCTTCTGCTGCTTCTCATCTGCTGCTTCTCATCTGCTTCTTCC  
AAGGCCTC

GAAGCTGAGGAAGAAGATTGACTGACAGAGCTTGATACATCAGAAGCTGAAGAAGAAGATTGACTGACAGA  
GCTTGAGACATCAGAAGTAGAGGAAGCTGATTGACTGACAGAGCTTGAGACATCAGAAGCTGAAGAAGAAG  
ATTGACTG

AACAGGTTGAGTTGGTTGAACAGGTTGAGTTGGCTGAACAGGTTGAGTTGGCTGAACAGGTTGAGTTGGCT  
GAACAGGTTGAGTTGGTTGAACAGGTTGTGTTGATTGAACAGGTTGAGTTGGTTGAGCGACTTCCACATAT  
TTTTCTTC

TGACAGAGCTTGAGACATCAGAAGTAGAGGAAGCTGATTGACTGACAGAGCTTGAGACATCAGAAGCTGAG  
GAAGAAGATTGACTGACAGAGCTTGATACATCAGAAGCTGAAGAAGAAGATTGACTGACAGAGCTTGAGAC  
ATCAGAAG

CCACTGCTTCTCAGACGCTTCTTCTGCTTCTGAATCCTCTTCAGCTGCTTCTTCTTCTGCTTCTGAATCC  
TCTTCAGCTGCCTCCTCTTCTGCTTCTGAATCCTCTTCAGCTGCTTCTTCTCTGCTTCTCAGAATCTTCTTC  
TGCTGCCT

AGACACCAGAAGTAGAGGAAGCTGATTGACTGACAGAGCTTGAGACATCAGAAGTAGAGGAAGCTGATTGA  
CTGACAGAGCTTGAGACATCAGAAGCTGAGGAAGAAGATTGACTGACAGAGCTTGATACATCAGAAGCTGA  
AGAAGAAG

TCCGAATCTGCCACTGCTTCTCAGACGCTTCTTCTGCTTCTGAATCCTCTTCAGCTGCTTCTTCTTCTGCT  
TTCTGAATCCTCTTCAGCTGCCTCCTCTTCTGCTTCTGAATCCTCTTCAGCTGCTTCTTCTCTGCTTCTCAG  
AATCTTCT

TCTTCTGCTTCTGAATCCTCTTCAGCTGCTTCTTCTTCTGCTTCTGAATCCTCTTCAGCTGCCTCCTCTTC  
TGCTTCTGAATCCTCTTCAGCTGCTTCTTCTCTGCTTCTCAGAATCTTCTTCTGCTGCCTCCTCTTCTGCTT  
CTGAAGCT

CATTGTCTGTTTAAAGCGACAAATGGCGTCGAGTAGGGAATCCCCTTGCCAAGCATGCAGCCCTGTGTTTC  
TGTAGCACCAGCTCCAACATTGAGAACATTTCCACAGGCAACTTCTTCGATTAAGTTCAAATCAGCCCTCA  
AAGTTTCC

GGAAGAAGATTGACTGACAGAGCTTGATACATCAGAAGCTGAAGAAGAAGATTGACTGACAGAGCTTGAGA  
CATCAGAAGTAGAGGAAGCTGATTGACTGACAGAGCTTGAGACATCAGAAGCTGAGGAAGCTGATTGACTG  
ACAGAGCT

GAAGAGCTTTTCAGTGGTAGAGCTGGTACTGGAGCAGAAGAGCTTTTCAGTGGTGGAGCTTGATGGGGTTGG  
AGCTGGAGCAGAAGAGCTTTTCAGTAGTAGAGCTGGATGGAGTTGGTACTGGAGCAGAAGAGCTTTTCAGTGG  
TAGAGCTG

GCTGATTGACTGACAGAGCTTGAGACATCAGAAGTAGAGGAAGCTGATTGACTGACAGAGCTTGAGACATC  
AGAAGCTGAGGAAGAAGATTGACTGACAGAGCTTGATACATCAGAAGCTGAAGAAGAAGATTGACTGACAG  
AGCTTGAG

CACAGGTGAGGGGCAGTGTTGATAAGATGTTTACGCTCGTTGAGTGCCTCGATGACCAGATCCAGTTGTGC  
CTTGAGAACTCCCAGAAGGCCTTCTCTAAGTACCGCACCCACCGTGAATCATCTTGGTAGATTTGGACG  
ACGTTCCC

TACTGGAGCAGAAGAGCTTTCAGTGGTAGAGCTGGTTACTGGAGCAGAAGAGCTTTCAGTGGTGGAGCTTG  
ATGGGGTTGGAGCTGGAGCAGAAGAGCTTTCAGTAGTAGAGCTGGATGGAGTTGGTACTGGAGCAGAAGAG  
CTTTCAGT

AAGAAGATTGACTGACAGAGCTTGATACATCAGAAGCTGAAGAAGAAGATTGACTGACAGAGCTTGAGACA  
TCAGAAGTAGAGGAAGCTGATTGACTGACAGAGCTTGAGACATCAGAAGCTGAAGAAGAAGATTGACTGAC  
AGAGCTTG

TCCACCAACAACACTGCTGTAATTGGTTCTTGTTCATTAGTTCCATGCCTCGTTGCAAGGGCAGAGGCTGCCC  
TCTGATGAGCGATCCTGGCTGAGGCCTCCTCTTGGAGACGCCCCATATTTTCATCACATTCTTGTACGAG  
GTAGTTCT

AGTAGAGGAAGCTGATTGACTGACAGAGCTTGAGACATCAGAAGTAGAGGAAGCTGATTGACTGACAGAGC  
TTGAGACATCAGAAGCTGAGGAAGAAGATTGACTGACAGAGCTTGATACATCAGAAGCTGAAGAAGAAGAT  
TGACTGAC

GCTGCTTCTTCTCTGCTTTCAGAATCTTCTTCTGCTGCCTCCTCTTCTGCTTCTGAAGCTGCTAAGTCTTC  
TAGCTCTGCCAAGTCTTCTGGCTCTTCTGCTGCTTCATCTGCTGCTTCATCTGCTTCTTCCAAGGCCTCTT  
CTGCAGCT

ACAGAGCTTGAGACATCAGAAGCTGAGGAAGCTGATTGACTGACAGAGCTTGAGACATCAGAAGCTGAGGA  
AGAAGATTGACTGACAGAGCTTGATACATCAGAAGCTGAAGAAGAAGATTGACTGACAGAGCTTGAGACAT  
CAGAAGTA

CGGATGAGACTGATTGGCTGCCAGAGCTTGAGACACCAGAAGTAGAGGAAGCTGATTGACTGACAGAGCTT  
GAGACATCAGAAGTAGAGGAAGCTGATTGACTGACAGAGCTTGAGACATCAGAAGCTGAGGAAGAAGATTG  
ACTGACAG

TCCTTAGGTCAAACCGTTTTCCGAATCTGGTTCCGAATCTGCCACTGCTTCTCAGACGCTTCTTCTGCTTC  
TGAATCCTCTTTCAGCTGCTTCTTCTTCTGCTTCTGAATCCTCTTTCAGCTGCCTCCTCTTCTGCTTCTGAAT  
CCTCTTCA

AAACATGAAATGTGAAGACGTTGCCCTCGTCATAGGTAAGCGGTGGTCATCACCAACCATCAGCGGTGACA  
ATAACACAGCAAACAGTCTTGTGTTGACTCTCCTGCCTGCATGGTGTGTTGAAAGTGAATCGTCAGGATTTGC  
ACAACCA

AAACCGTTTTCCGAATCTGGTTCCGAATCTGCCACTGCTTCTCAGACGCTTCTTCTGCTTCTGAATCCTCT  
TCAGCTGCTTCTTCTTCTGCTTCTGAATCCTCTTTCAGCTGCCTCCTCTTCTGCTTCTGAATCCTCTTTCAG  
TGCTTCTT

CTACCAGAAGCGGATGAGACTGATTGGCTGCCAGAGCTTGAGACACCAGAAGTAGAGGAAGCTGATTGACT  
GACAGAGCTTGAGACATCAGAAGTAGAGGAAGCTGATTGACTGACAGAGCTTGAGACATCAGAAGCTGAGG  
AAGAAGAT

GTTGGTTGAACAGGTTGAGTTGGCTGAACAGGTTGAGTTGGCTGAACAGGTTGAGTTGGCTGAACAGGTTG  
AGTTGGTTGAACAGGTTGTGTTGATTGAACAGGTTGAGTTGGTTGAGCGACTTCCACATATTTTTCTTCTT  
GGAATGGA

ATCTTTTGTTCCTTCAATCAAGAAAGCTCTGACGATTCTTTCCTTGACACAGTTGGCACATCTGGAACCACC  
GTAAGCTCTGGAAACAGTCTTGTGGGTCTTGGAGACAGTAGCGTATTGTCTTGGTCTCAAAGTGGAATAC  
CTTGTAGA

GCTTTCAGTAGTAGAGCTGGATGGAGTTGGTACTGGAGCAGAAGAGCTTTCAGTGGTAGAGCTGGTTACTG  
GAGCAGAAGAGCTTTCAGTGGTGGAGCTTGATGGGGTTGGAGCTGGAGCAGAAGAGCTTTCAGTAGTAGAG  
CTGGATGG

CAGAAGCTGAGGAAGAAGATTGACTGACAGAGCTTGATACATCAGAAGCTGAAGAAGAAGATTGACTGACA  
GAGCTTGAGACATCAGAAGTAGAGGAAGCTGATTGACTGACAGAGCTTGAGACATCAGAAGCTGAGGAAGC  
TGATTGAC

CTGGTTACTGGAGTAGAAGAGCTTTCAGTAGTAGAGCTGGATGGAGTTGGTACTGGAGCAGAAGAGCTTTC  
AGTGGTAGAGCTGGTTACTGGAGCAGAAGAGCTTTCAGTGGTGGAGCTTGATGGGGTTGGAGCTGGAGCAG  
AAGAGCTT

CAGAAGCTGAAGAAGAAGATTGACTGACAGAGCTTGAGACATCAGAAGTAGAGGAAGCTGATTGACTGACA  
GAGCTTGAGACATCAGAAGCTGAAGAAGAAGATTGACTGACAGAGCTTGATACATCAGAAACGGATGAAGA  
GGATTGGC

TGATTGACTGACAGAGCTTGAGACATCAGAAGCTGAGGAAGCTGATTGACTGACAGAGCTTGAGACATCAG  
AAGCTGAGGAAGAAGATTGACTGACAGAGCTTGATACATCAGAAGCTGAAGAAGAAGATTGACTGACAGAG  
CTTGAGAC

CAGTATTACCTCCTTAGGTCAAACCGTTTTCCGAATCTGGTTCGAATCTGCCACTGCTTCCTCAGACGCTT  
CTTCTGCTTCTGAATCCTCTTCAGCTGCTTCTTCTTCTGCTTCTGAATCCTCTTCAGCTGCCTCCTCTTCT  
GCTTCTGA

TGTGAAGACGTTGCCCTCGTCATAGGTAAGCGGTGGTCATCACAACCATCAGCGGTGACAATAACACAGC  
AAACAGTCTTGTGTTGACTCTCCTGCCTGCATGGTGTGTTGAAAGTGAATCGTCAGGATTTGCAACAACCAAT  
AGTGTACT

AGAAGAAGATTGACTGACAGAGCTTGAGACATCAGAAGTAGAGGAAGCTGATTGACTGACAGAGCTTGAGA  
CATCAGAAGCTGAAGAAGAAGATTGACTGACAGAGCTTGATACATCAGAAACGGATGAAGAGGATTGGCTG  
ACAGAGCT

ATTGACTGACAGAGCTTGAGACATCAGAAGCTGAAGAAGAAGATTGACTGACAGAGCTTGATACATCAGAA  
ACGGATGAAGAGGATTGGCTGACAGAGCTTGAGACAACAGAGGAAGAGGATGGACCGACAGAGCTCGAGAC  
ACCAGAAG

GATGGGGTTGGAGCTGGAGCAGAAGAGCTTTCAGTAGTAGAGCTGGATGGAGTTGGTACTGGAGCAGAAGA  
GCTTTCAGTGGTAGAGCTGGTTACTGGAGCAGAAGAGCTTTCAGTAGTAGAGCTGGATGGAGTTGGTACTG  
GAGCAGAA

CGTTGAACTACGCCCTCAGTAAAGTGGCTTTGAACTCCAGTGAATGTTTGAACAAGATGTTCCCCACCGAG  
GAACAACCCTTGGCTTCGGCACTCTTGCAATTCAGTGATGTGCAGGCTAAGATTGCTCAAGCTAGAATTCA  
ACAAGATA

AGAGCTTGAGACATCAGAAGCTGAAGAAGAAGATTGACTGACAGAGCTTGATACATCAGAAACGGATGAAG  
AGGATTGGCTGACAGAGCTTGAGACAACAGAGGAAGAGGATGGACCGACAGAGCTCGAGACACCAGAAGTG  
GATGAAGC

GAACCCAAGACGTTGAACTACGCCCTCAGTAAAGTGGCTTTGAACTCCAGTGAATGTTTGAACAAGATGTT  
CCCCACCGAGGAACAACCCTTGGCTTCGGCACTCTTGCAATTCAGTGATGTGCAGGCTAAGATTGCTCAAG  
CTAGAATT

GAGTAGAAGAGCTTTTCAGTAGTAGAGCTGGATGGAGTTGGTACTGGAGCAGAAGAGCTTTTCAGTGGTAGAG  
CTGGTTACTGGAGCAGAAGAGCTTTTCAGTGGTGGAGCTTGATGGGGTTGGAGCTGGAGCAGAAGAGCTTTTC  
AGTAGTAG

CCAGGTGCTGTAGATGGGGATCAGAATTGGTAGCACCGTGCACAGGTGAGGGGCAGTGGTATAAGATGTT  
TACGCTCGTTGAGTGCCTCGATGACCAGATCCAGTTGTGCCTTGGAGAACTCCCAGAAGGCCTTCTCTAAG  
TACCGCAC

ATGGGGTTGGTACTGGAGCAGAAGAGCTTTTCGGTAGTAGAGCTGGATGGAGTTGGCACTGGAGCAGAAGAG  
CTTTTCAGTAGTAGAGCTGGATGGAGTTGGTACTGGAGCAGAAGAGCTTTTCAGTGGTAGAGCTGGTTACTGG  
AGCAGAAG

ACTGACAGAGCTTGAGACATCAGAAGCTGAGGAAGAAGATTGACTGACAGAGCTTGATACATCAGAAGCTG  
AAGAAGAAGATTGACTGACAGAGCTTGAGACATCAGAAGTAGAGGAAGCTGATTGACTGACAGAGCTTGAG  
ACATCAGA

GAAGTAGAGGAAGCTGATTGACTGACAGAGCTTGAGACATCAGAAGCTGAGGAAGAAGATTGACTGACAGA  
GCTTGATACATCAGAAGCTGAAGAAGAAGATTGACTGACAGAGCTTGAGACATCAGAAGTAGAGGAAGCTG  
ATTGACTG

CCTCTTCTGCTTCTGAAGCTGCTAAGTCTTCTAGCTCTGCCAAGTCTTCTGGCTCTTCTGCTGCTTCATCT  
GCTGCTTCATCTGCTTCTTCCAAGGCCTCTTCTGCAGCTTCTCTTCTGCAAAGGCCTCCTCTTCTGCAGA  
AAAATCTA

CCCCATCAAAGAACCCAAGACGTTGAACTACGCCCTCAGTAAAGTGGCTTTGAACTCCAGTGAATGTTTGA  
ACAAGATGTTCCCCACCGAGGAACAACCTTGGCTTCGGCACTCTTGCAATTCAGTGATGTGCAGGCTAAG  
ATTGCTCA

GCCTCCTCTTCTGCTTCTGAATCCTCTTTCAGCTGCTTCTTCTCTGCTTTCAGAATCTTCTTCTGCTGCCTC  
CTCTTCTGCTTCTGAAGCTGCTAAGTCTTCTAGCTCTGCCAAGTCTTCTGGCTCTTCTGCTGCTTCATCTG  
CTGCTTCA

AAGATCATACCGCTTACCATTAAGGATGTAGAGAATCTAGCCACCGACAACACTTCTGATGGCAGCTCTCC  
GCAGGATGACCCAACAATGACTGATGGTGCAGACGAATCAGACACACCGTCGAACGAGCAAGAACTGTCT  
TAGATGAA

TCATCTTCATCTTCATCATCGGATTCTTGGCTTTGCATTATATACATTCTGAACAGGTTGAGTTGGTTGAAC  
AGGTTGAGTTGGCTGAACAGGTTGAGTTGGCTGAACAGGTTGAGTTGGCTGAACAGGTTGAGTTGGTTGAA  
CAGGTTGT

GCTGATTGACTGACAGAGCTTGAGACATCAGAAGCTGAGGAAGAAGATTGACTGACAGAGCTTGATACATC  
AGAAGCTGAAGAAGAAGATTGACTGACAGAGCTTGAGACATCAGAAGTAGAGGAAGCTGATTGACTGACAG  
AGCTTGAG

TACTGGAGCAGAAGAGCTTTTCGGTAGTAGAGCTGGATGGAGTTGGCACTGGAGCAGAAGAGCTTTTCAGTAG  
TAGAGCTGGATGGAGTTGGTACTGGAGCAGAAGAGCTTTTCAGTGGTAGAGCTGGTTACTGGAGCAGAAGAG  
CTTTTCAGT

CTTCTTAACAATCTTTTGTCTTCAATCAAGAAAGCTCTGACGATTCTTTCCTTGACACAGTTGGCACATC  
TGGAACCACCGTAAGCTCTGGAAACAGTCTTGTGGGTCTTGGAGACAGTAGCGTATTGTCTTGGTCTCAAA  
GTGGAAAT

TGGGGTTGGAGCTGGAGCAGAAGAGCTTTTCAGTAGTAGAGCTTGATGGAGTTGGTACTGGAGCAGAAGAGC  
TTTCAGTAGTAGAGCTTGATGGAGTTGGCACTGGAGCAGAAGAGCTTTTCAGTGGTGGAGCTGGTTACTGGA  
GTAGAAGA

CAGTGGTAGAGCTGGTTACTGGAGCAGAAGAGCTTTCAGTGGTGGAGCTTGATGGGGTTGGAGCTGGAGCA  
GAAGAGCTTTCAGTAGTAGAGCTGGATGGAGTTGGTACTGGAGCAGAAGAGCTTTCAGTGGTAGAGCTGGT  
TACTGGAG

CTTCTGAATCCTCTTCAGCTGCCTCCTCTTCTGCTTCTGAATCCTCTTCAGCTGCTTCTTCCTCTGCTTCA  
GAATCTTCTTCTGCTGCCTCCTCTTCTGCTTCTGAAGCTGCTAAGTCTTCTAGCTCTGCCAAGTCTTCTGG  
CTCTTCTG

TAAGGATGTAGAGAATCTAGCCACCGACAACACTTCTGATGGCAGCTCTCCGCAGGATGACCCAACAATGA  
CTGATGGTGCAGACGAATCAGACACACCGTTCGAACGAGCAAGAACTGTCTTAGATGAAAACATACCTTAT  
CCAACACA

ACATCAGAAGCTGAAGAAGAAGATTGACTGACAGAGCTTGATACATCAGAAACGGATGAAGAGGATTGGCT  
GACAGAGCTTGAGACAACAGAGGAAGAGGATGGACCGACAGAGCTCGAGACACCAGAAGTGGATGAAGCTG  
ATTGTGTG

CTTGATACATCAGAAGCTGAAGAAGAAGATTGACTGACAGAGCTTGAGACATCAGAAGTAGAGGAAGCTGA  
TTGACTGACAGAGCTTGAGACATCAGAAGCTGAAGAAGAAGATTGACTGACAGAGCTTGATACATCAGAAA  
CGGATGAA

TTGCCCTCGTCATAGGTAAGCGGTGGTCATCACAAACATCAGCGGTGACAATAACACAGCAAACAGTCTT  
GTTTACTCTCCTGCCTGCATGGTGTGTTGAAAGTGAATCGTCAGGATTTGCAACAACCAATAGTGTACTGC  
TATTCGCA

CAGGTTGAGTTGGCTGAACAGGTTGAGTTGGCTGAACAGGTTGAGTTGGCTGAACAGGTTGAGTTGGTTGA  
ACAGGTTGTGTTGATTGAACAGGTTGAGTTGGTTGAGCGACTTCCACATATTTTTCTTCTTGAATGGAGT  
TGCTCTAG

TGACAGAGCTTGAGACATCAGAAGCTGAGGAAGAAGATTGACTGACAGAGCTTGATACATCAGAAGCTGAA  
GAAGAAGATTGACTGACAGAGCTTGAGACATCAGAAGTAGAGGAAGCTGATTGACTGACAGAGCTTGAGAC  
ATCAGAAG

GATAAGAACGTGTCCGATGCCATGGACTCGTTATCTAAGGCGAAGGAGGACTTGAAACAGTACGGCAGCCA  
CTGGTGGTCTGGATGGACTTCCAAGGTCGACAATGACAAGCAGGCTTTAAAAGATGAGGCCCAAAAAGAAGT  
ACGATGAA

GCTAAGTCTTCTAGCTCTGCCAAGTCTTCTGGCTCTTCTGCTGCTTCATCTGCTGCTTCATCTGCTTCTTC  
CAAGGCCTCTTCTGCAGCTTCTCTTCTGCAAAGGCCTCCTCTTCTGCAGAAAAATCTACTAATAGCTCCT  
CCTCTGCT

GCTGGAGCAGAAGAGCTTTCAGTAGTAGAGCTTGATGGAGTTGGTACTGGAGCAGAAGAGCTTTCAGTAGT  
AGAGCTTGATGGAGTTGGCACTGGAGCAGAAGAGCTTTCAGTGGTGGAGCTGGTTACTGGAGTAGAAGAGC  
TTTCAGTA

GGTAGAGCTGGTTACTGGAGCAGAAGAGCTTTCAGTAGTAGAGCTGGATGGAGTTGGTACTGGAGCAGAAG  
AGCTTTCAGTGGTAGAGCTGGTTACTGGAGCAGAAGAGCTTTCAGTAGTAGAGCTGGATGGAGTTGGTACT  
GGAGCAGA

TGGATGGGGTTGGTACTGGAGCAGAAGAGCTTTCAGTAGTAGAGCTGGATGGAGTTGGTACTGGAGCAGAA  
GAGCTTTCAGTGGTAGAGCTGGTTACTGGAGCAGAAGAGCTTTCAGTAGTAGAGCTTGATGGGGTTGGAGC  
TGGAGCAG

TGGTAGAGCTGGTTACTGGAGCAGAAGAGCTTTCAGTAGTAGAGCTGGATGGAGTTGGTACTGGAGCAGAA  
GAGCTTTCAGTGGTAGAGCTGGTTACTGGAGCAGAAGAGCTTTCAGTGGTAGAGCTGGTTACTGGAGCAGA  
AGAGCTTT



CCTCTGCTTCAGAATCTTCTTCTGCTGCCTCCTCTTCTGCTTCTGAAGCTGCTAAGTCTTCTAGCTCTGCC  
AAGTCTTCTGGCTCTTCTGCTGCTTCATCTGCTGCTTCATCTGCTTCTTCCAAGGCCTCTTCTGCAGCTTC  
CTCTTCTG

TGGTAGAGCTGGTTACTGGAGCAGAAGAGCTTTTCAGTAGTAGAGCTGGATGGAGTTGGTACTGGAGCAGAA  
GAGCTTTTCAGTAGTAGAGCTGGATGGGGTTGGTACTGGAGCAGAAGAGCTTTTCAGTAGTAGAGCTGGATGG  
AGTTGGTA

TGACTGACAGAGCTTGAGACATCAGAAGTAGAGGAAGCTGATTGACTGACAGAGCTTGAGACATCAGAAGC  
TGAAGAAGAAGATTGACTGACAGAGCTTGATACATCAGAAACGGATGAAGAGGATTGGCTGACAGAGCTTG  
AGACAACA

AGACATCAGAAGCTGAGGAAGCTGATTGACTGACAGAGCTTGAGACATCAGAAGCTGAGGAAGAAGATTGA  
CTGACAGAGCTTGATACATCAGAAGCTGAAGAAGAAGATTGACTGACAGAGCTTGAGACATCAGAAGTAGA  
GGAAGCTG

GCAGAAGAGCTTTTCAGTAGTAGAGCTGGATGGAGTTGGTACTGGAGCAGAAGAGCTTTTCAGTGGTAGAGCT  
GGTTACTGGAGCAGAAGAGCTTTTCAGTGGTAGAGCTGGTTACTGGAGCAGAAGAGCTTTTCAGTGGTAGAGC  
TGGTTACT

CTTTCAGTGGTAGAGCTGGTTACTGGAGCAGAAGAGCTTTTCAGTGGTAGAGCTGGTTACTGGAGCAGAAGA  
GCTTTTCAGTGGTAGAGCTGGTTACTGGAGCAGAAGAGCTTTTCAGTAGTAGAGCTGGATGGAGTTGGTACTG  
GAGCAGAA

GGTAGAGCTGGTTACTGGAGCAGAAGAGCTTTTCAGTAGTAGAGCTGGATGGAGTTGGTACTGGAGCAGAAG  
AGCTTTTCAGTGGTAGAGCTGGTTACTGGAGCAGAAGAGCTTTTCAGTGGTAGAGCTGGTTACTGGAGCAGAA  
GAGCTTTTC

CTTGATGGAGTTGGTACTGGAGCAGAAGAGCTTTTCAGTAGTAGAGCTTGATGGAGTTGGCACTGGAGCAGA  
AGAGCTTTTCAGTGGTGGAGCTGGTTACTGGAGTAGAAGAGCTTTTCAGTAGTAGAGCTGGATGGAGTTGGTA  
CTGGAGCA

TTCTGAAGCTGCTAAGTCTTCTAGCTCTGCCAAGTCTTCTGGCTCTTCTGCTGCTTCATCTGCTGCTTCAT  
CTGCTTCTTCCAAGGCCTCTTCTGCAGCTTCCTCTTCTGCAAAGGCCTCCTCTTCTGCAGAAAAATCTACT  
AATAGCTC

GCTGGTTACTGGAGCAGAAGAGCTTTTCAGTGGTGGAGCTTGATGGGGTTGGAGCTGGAGCAGAAGAGCTTT  
CAGTAGTAGAGCTGGATGGAGTTGGTACTGGAGCAGAAGAGCTTTTCAGTGGTAGAGCTGGTTACTGGAGCA  
GAAGAGCT

AGCTGGATGGAGTTGGTACTGGAGCAGAAGAGCTTTTCAGTAGTAGAGCTGGATGGAGTTGGTACTGGAGCA  
GAAGAGCTTTTCAGTGGTAGAGCTGGTTACTGGAGCAGAAGAGCTTTTCAGTGGTAGAGCTGGTTACTGGAGC  
AGAAGAGC

CTGCTTCTGAATCCTCTTTCAGCTGCTTCTTCTCTGCTTTCAGAATCTTCTTCTGCTGCCTCCTCTTCTGCT  
TCTGAAGCTGCTAAGTCTTCTAGCTCTGCCAAGTCTTCTGGCTCTTCTGCTGCTTCATCTGCTGCTTCATC  
TGCTTCTT

TTGCTCCAGGCCCATCAAAGAACCCAAGACGTTGAACTACGCCCTCAGTAAAGTGGCTTTGAACTCCAGT  
GAATGTTTGAACAAGATGTTCCCCACCGAGGAACAACCTTGGCTTCGGCACTCTTGCAATTCAGTGATGT  
GCAGGCTA

AGAATCTTCTTCTGCTGCCTCCTCTTCTGCTTCTGAAGCTGCTAAGTCTTCTAGCTCTGCCAAGTCTTCTG  
GCTCTTCTGCTGCTTCATCTGCTGCTTCATCTGCTTCTTCCAAGGCCTCTTCTGCAGCTTCCTCTTCTGCA  
AAGGCCTC

GGAGTTGGTACTGGAGCAGAAGAGCTTTCAGTGGTAGAGCTGGTTACTGGAGCAGAAGAGCTTTCAGTGGT  
AGAGCTGGTTACTGGAGCAGAAGAGCTTTCAGTGGTAGAGCTGGTTACTGGAGCAGAAGAGCTTTCAGTGG  
TAGAGCTG

CAGAAGAGCTTTCAGTAGTAGAGCTGGATGGAGTTGGTACTGGAGCAGAAGAGCTTTCAGTGGTAGAGCTG  
GTTACTGGAGCAGAAGAGCTTTCAGTGGTAGAGCTGGTTACTGGAGCAGAAGAGCTTTCAGTAGTAGAGCT  
TGATGGGG

AGCTGAGGAAGCTGATTGACTGACAGAGCTTGAGACATCAGAAGCTGAGGAAGAAGATTGACTGACAGAGC  
TTGATACATCAGAAGCTGAAGAAGAAGATTGACTGACAGAGCTTGAGACATCAGAAGTAGAGGAAGCTGAT  
TGACTGAC

TTGGTACTGGAGCAGAAGAGCTTTCAGTAGTAGAGCTTGATGGAGTTGGCACTGGAGCAGAAGAGCTTTC  
GTGGTGGAGCTGGTTACTGGAGTAGAAGAGCTTTCAGTAGTAGAGCTGGATGGAGTTGGTACTGGAGCAGA  
AGAGCTTT

CGTCGTCATCTTCGTCGTTGCCCTCACCTTCCTCTTCAGAATCCACATCCACGACCCTCAACCGCATCGAG  
GGGTCTGCCTCAACACGGTCCACTTGAGGAACCTTCCTCCCTTACTCTGCTGCGGCTACTGGCCCTGCT  
TCTCGACC

GATGGAGTTGGTACTGGAGCAGAAGAGCTTTCAGTAGTAGAGCTGGATGGAGTTGGTACTGGAGCAGAAGA  
GCTTTCAGTAGTAGAGCTGGATGGAGTTGGTACTGGAGCAGAAGAGCTTTCAGTGGTAGAGCTGGTTACTG  
GAGCAGAA

GAAAGCTCTGACGATTCTTTCCTTGACACAGTTGGCACATCTGGAACCACCGTAAGCTCTGGAAACAGTCT  
TGTGGGTCTTGAGACAGTAGCGTATTGTCTTGGTCTCAAAGTGGAAATACCTTGTAGAGCACTACCACAG  
TCACCACA

GAGGAAGCTGATTGACTGACAGAGCTTGAGACATCAGAAGCTGAAGAAGAAGATTGACTGACAGAGCTTGA  
TACATCAGAAACGGATGAAGAGGATTGGCTGACAGAGCTTGAGACAACAGAGGAAGAGGATGGACCGACAG  
AGCTCGAG

TGAGACATCAGAAGTAGAGGAAGCTGATTGACTGACAGAGCTTGAGACATCAGAAGCTGAGGAAGAAGATT  
GACTGACAGAGCTTGATACATCAGAAGCTGAAGAAGAAGATTGACTGACAGAGCTTGAGACATCAGAAGTA  
GAGGAAGC

GTCCTGTATCAGCAGCTCAATGTTTCGACCTAATCTTGTAAATGCTGGTTCGAACGACAGTTGCGACAGCAGCT  
CGTGTGAGGGTCGCTGGCGATGTGCCAGCGCATTCCCCACATTTCCATGAACGCATAATCTTCCACATA  
CTACCGTG

AAGCTGATTGACTGACAGAGCTTGAGACATCAGAAGCTGAGGAAGAAGATTGACTGACAGAGCTTGATACA  
TCAGAAGCTGAAGAAGAAGATTGACTGACAGAGCTTGAGACATCAGAAGTAGAGGAAGCTGATTGACTGAC  
AGAGCTTG

CTAGCTCTGCCAAGTCTTCTGGCTCTTCTGCTGCTTCATCTGCTGCTTCATCTGCTTCTTCCAAGGCCTCT  
TCTGCAGCTTCTTCTTGCAAAGGCCTCCTCTTCTGCAGAAAAATCTACTAATAGCTCCTCCTCTGCTAC  
CTCCAAGA

AGAGCTGGATGGAGTTGGTACTGGAGCAGAAGAGCTTTCAGTGGTAGAGCTGGTTACTGGAGCAGAAGAGC  
TTCAGTGGTAGAGCTGGTTACTGGAGCAGAAGAGCTTTCAGTGGTAGAGCTGGTTACTGGAGCAGAAGAG  
CTTTCAGT

CAGTTGAAATTGCTGAAGCTGTTTTCAACTATGGTACTTACCACCATGTTGACTGGTATTCCAGCTGAA  
CAAGTCACCAGAGTTATCACTGGTGTTCATGGTACTCTACCAGATTGAGACCAGCTATCTCCAGTGCTCT  
ATCTAAGG

AGTAGTAGAGCTTGATGGAGTTGGTACTGGAGCAGAAGAGCTTTCAGTAGTAGAGCTTGATGGAGTTGGCA  
CTGGAGCAGAAGAGCTTTCAGTGGTGGAGCTGGTTACTGGAGTAGAAGAGCTTTCAGTAGTAGAGCTGGAT  
GGAGTTGG

ATTGAGGGAATGAGCTTGAGCTACCAGAAGCGGATGAGACTGATTGGCTGCCAGAGCTTGAGACACCAGAA  
GTAGAGGAAGCTGATTGACTGACAGAGCTTGAGACATCAGAAGTAGAGGAAGCTGATTGACTGACAGAGCT  
TGAGACAT

AGTAGAGCTGGATGGAGTTGGTACTGGAGCAGAAGAGCTTTCAGTGGTAGAGCTGGTTACTGGAGCAGAAG  
AGCTTTCAGTGGTAGAGCTGGTTACTGGAGCAGAAGAGCTTTCAGTAGTAGAGCTGGATGGAGTTGGTACT  
GGAGCAGA

GGTTACTGGAGCAGAAGAGCTTTCAGTAGTAGAGCTGGATGGAGTTGGTACTGGAGCAGAAGAGCTTTCAG  
TGGTAGAGCTGGTTACTGGAGCAGAAGAGCTTTCAGTGGTAGAGCTGGTTACTGGAGCAGAAGAGCTTTCAG  
GTGGTAGA

GATGAGGTTGATTGAGGGAATGAGCTTGAGCTACCAGAAGCGGATGAGACTGATTGGCTGCCAGAGCTTGA  
GACACCAGAAGTAGAGGAAGCTGATTGACTGACAGAGCTTGAGACATCAGAAGTAGAGGAAGCTGATTGAC  
TGACAGAG

CTGGAGCAGAAGAGCTTTCAGTAGTAGAGCTGGATGGGGTTGGTACTGGAGCAGAAGAGCTTTCAGTAGTA  
GAGCTGGATGGAGTTGGTACTGGAGCAGAAGAGCTTTCAGTGGTAGAGCTGGTTACTGGAGCAGAAGAGCT  
TTCAGTAG

ATTTCTTGATGAAACTCATGGATACGTGGTCCGTTTCATTGTGAAAGGATCACTGAGTTGCCACTTTGAGTT  
TTCGTCAATCACAGGAGCGTCTGGTAGACCAGCAACCTTGGAGTACAAGCTTCCCACATCAATTCTAAAGC  
CGTCTACA

CCTTAACGACCTTCTTAACAATCTTTTGTCTTCAATCAAGAAAGCTCTGACGATTCTTTCCTTGACACAG  
TTGGCACATCTGGAACCACCGTAAGCTCTGGAAACAGTCTTGTGGGTCTTGGAGACAGTAGCGTATTGTCT  
TGGTCTCA

TGGTTACTGGAGCAGAAGAGCTTTCAGTAGTAGAGCTTGATGGGGTTGGAGCTGGAGCAGAAGAGCTTTCAG  
GTAGTAGAGCTTGATGGAGTTGGTACTGGAGCAGAAGAGCTTTCAGTAGTAGAGCTTGATGGAGTTGGCAC  
TGGAGCAG

CTTTCAGTAGTAGAGCTGAATGGAATTGAAGATGGAGCGGAGGAAGTGATGTTGCTAGAGGAAGATGGGGT  
TGGTACTGGTGCTACAGAGCTTTCAGTGGTGGAGCTGGATACTGGAGCAGAAGAGCTTTCAGTAGTAGAGC  
TTGATGGG

TTCAGTAGTAGAGCTGGATGGAGTTGGTACTGGAGCAGAAGAGCTTTCAGTGGTAGAGCTGGTTACTGGAG  
CAGAAGAGCTTTCAGTGGTAGAGCTGGTTACTGGAGCAGAAGAGCTTTCAGTAGTAGAGCTTGATGGGGTT  
GGTACTGG

ACCTGAAGAACATTGTCTGTTTAAAGCGACAAATGGCGTCGAGTAGGGAATCCCCTTGCCAAGCATGCAG  
CCCTGTGTTCTGTAGCACC GGCTCCAACATTGAGAACATTTCCACAGGCAACTTCTTCGATTAAGTTCAA  
TCAGCCCT

GTTGGTACTGGTGCTACAGAGCTTTCAGTAGTAGAGCTTGATGGGGTTGGTACTGGAGCAGAAGAGCTTTC  
GGTAGTAGAGCTGGATGGAGTTGGCACTGGAGCAGAAGAGCTTTCAGTAGTAGAGCTGGATGGAGTTGGTA  
CTGGAGCA

TAGAGCTGAATGGAATTGAAGATGGAGCGGAGGAAGTGATGTTGCTAGAGGAAGATGGGGTTGGTACTGGT  
GCTACAGAGCTTTCAGTGGTGGAGCTGGATACTGGAGCAGAAGAGCTTTCAGTAGTAGAGCTTGATGGGGT  
TGGTACTG

AGCTTTCAGTAGTAGAGCTGGATGGAGTTGGTACTGGAGCAGAAGAGCTTTCAGTGGTAGAGCTGGTTACT  
GGAGCAGAAGAGCTTTCAGTGGTAGAGCTGGTTACTGGAGCAGAAGAGCTTTCAGTAGTAGAGCTGGATGG  
AGTTGGTA

TTCAGTAGTAGAGCTGGATGGAGTTGGTACTGGAGCAGAAGAGCTTTCAGTGGTAGAGCTGGTTACTGGA  
GCAGAAGAGCTTTCAGTGGTAGAGCTGGTTACTGGAGCAGAAGAGCTTTCAGTGGTAGAGCTGGTTACTGG  
AGCAGAAG

TAATGTAGGATTCCGTCTTGCCAGCATAGCGGATAAACACCGCAAGGAGGTGTTGTGGTCGGTAATGAGTG  
GCACGAGGTGTTTGCTAGGCGTCGGACTACCAGTTGATGTGACTGCTACGGAACTTTGACTCATGATGAA  
CAAGGACC

AGAGCTGGATGGAGTTGGTACTGGAGCAGAAGAGCTTTCAGTGGTAGAGCTGGTTACTGGAGCAGAAGAGC  
TTCAGTAGTAGAGCTTGATGGGGTTGGAGCTGGAGCAGAAGAGCTTTCAGTAGTAGAGCTTGATGGAGTT  
GGTACTGG

CGGATGGGTGGACAACATTTAAAGTAGGTGGCTCCGTCTGGGATCTGCTCTGCAGCAATACACAAATAGTG  
GAAACAAGTCTCTGTTGTGACTGGTAGCCCTGACGCACGTGCCTTTCTGATCAAGGGAATTGCTTTCATTG  
ATGCCAGA

CGCCCTCAGTAAAGTGGCTTTGAACTCCAGTGAATGTTTGAACAAGATGTTCCCCACCGAGGAACAACCCT  
TGGCTTCGGCACTCTTGCAATTCAGTGATGTGCAGGCTAAGATTGCTCAAGCTAGAATTCACAAGATACC  
TTGATTCA

GGAGTTGGTACTGGAGCAGAAGAGCTTTCAGTAGTAGAGCTGGATGGGGTTGGTACTGGAGCAGAAGAGCT  
TTCAGTAGTAGAGCTGGATGGAGTTGGTACTGGAGCAGAAGAGCTTTCAGTGGTAGAGCTGGTTACTGGAG  
CAGAAGAG

AGCTTGAGACATCAGAAGTAGAGGAAGCTGATTGACTGACAGAGCTTGAGACATCAGAAGCTGAAGAAGAA  
GATTGACTGACAGAGCTTGATACATCAGAAACGGATGAAGAGGATTGGCTGACAGAGCTTGAGACAACAGA  
GGAAGAGG

AGCAGAAGAGCTTTCAGTAGTAGAGCTTGATGGAGTTGGCACTGGAGCAGAAGAGCTTTCAGTGGTGGAGC  
TGGTTACTGGAGTAGAAGAGCTTTCAGTAGTAGAGCTGGATGGAGTTGGTACTGGAGCAGAAGAGCTTTC  
GTGGTAGA

GGTGTGCTTCTATGCTGTGCTGCTTTGCTGTCTTTGCCTCCGTTGGTGTGACAAAGCTGTGGCCTCAAGG  
AAGCAGTCACCAAGACATTACTTCTCAGGGTGCCGGTAACTGTATGATTGTGTTTACTATGTTCTTCATCT  
TTTTCGTTT

CTTCAATCAAGAAAGCTCTGACGATTCTTTCCTTGACACAGTTGGCACATCTGGAACCACCGTAAGCTCTG  
GAAACAGTCTTGTGGGTCTTGGAGACAGTAGCGTATTGTCTTGGTCTCAAAGTGGAAATACCTTGTAGAGC  
ACTACCAC

AGGAAGTGATGTTGCTAGAGGAAGATGGGGTTGGTACTGGTGTACAGAGCTTTCAGTGGTGGAGCTGGAT  
ACTGGAGCAGAAGAGCTTTCAGTAGTAGAGCTTGATGGGGTTGGTACTGGAACAGAAGAGCTTTCAGTGCT  
AGAGCTGA

AGAGCTTTCAGTGGTAGAGCTGGTTACTGGAGCAGAAGAGCTTTCAGTGGTAGAGCTGGTTACTGGAGCAG  
AAGAGCTTTCAGTGGTAGAGCTGGTTACTGGAGCAGAAGAGCTTTCAGTGGTAGAGCTGGTTACTGGAGCA  
GAAGAGCT

GTAGAGCTGGATGGAGTTGGTACTGGAGCAGAAGAGCTTTCAGTGGTAGAGCTGGTTACTGGAGCAGAAGA  
GCTTTCAGTAGTAGAGCTGGATGGAGTTGGTACTGGAGCAGAAGAGCTTTCAGTAGTAGAGCTGGATGGAG  
TTGGTACT

GCTGGATGGAGTTGGCACTGGAGCAGAAGAGCTTTTCAGTAGTAGAGCTGGATGGAGTTGGTACTGGAGCAG  
AAGAGCTTTTCAGTGGTAGAGCTGGTTACTGGAGCAGAAGAGCTTTTCAGTAGTAGAGCTGGATGGAGTTGGT  
ACTGGAGC

AGTGGTGGAGCTGGTTACTGGAGTAGAAGAGCTTTTCAGTAGTAGAGCTGGATGGAGTTGGTACTGGAGCAG  
AAGAGCTTTTCAGTGGTAGAGCTGGTTACTGGAGCAGAAGAGCTTTTCAGTGGTGGAGCTTGATGGGGTTGGA  
GCTGGAGC

ATCAGAAGTAGAGGAAGCTGATTGACTGACAGAGCTTGAGACATCAGAAGCTGAAGAAGAAGATTGACTGA  
CAGAGCTTGATACATCAGAAACGGATGAAGAGGATTGGCTGACAGAGCTTGAGACAACAGAGGAAGAGGAT  
GGACCGAC

GGTTACTGGAGCAGAAGAGCTTTTCAGTGGTAGAGCTGGTTACTGGAGCAGAAGAGCTTTTCAGTAGTAGAGC  
TTGATGGGGTTGGTACTGGAGCAGAAGAGCTTTTCAGTGGTAGAGCTGGTTACTGGAGCAGAAGAGCTTTCA  
GTAGTAGA

GAACTTGTTTCATTTCTTGATGAACTCATGGATACGTGGTCCGTTTCATTGTGAAAGGATCACTGAGTTGCC  
ACTTTGAGTTTTTCGTCAATCACAGGAGCGTCTGGTAGACCAGCAACCTTGGAGTACAAGCTTCCCACATCA  
ATTCTAAA

GCAGAAGAGCTTTTCAGTAGTAGAGCTGGATGGAGTTGGTACTGGAGCAGAAGAGCTTTTCAGTGGTAGAGCT  
GGTTACTGGAGCAGAAGAGCTTTTCAGTAGTAGAGCTTGATGGGGTTGGAGCTGGAGCAGAAGAGCTTTTCAG  
TAGTAGAG

CTGGAGCAGAAGAGCTTTTCAGTGGTAGAGCTGGTTACTGGAGCAGAAGAGCTTTTCAGTGGTAGAGCTGGTT  
ACTGGAGCAGAAGAGCTTTTCAGTGGTAGAGCTGGTTACTGGAGCAGAAGAGCTTTTCAGTGGTAGAGCTGGT  
TACTGGAG

GAAGAGCTTTTCGGTAGTAGAGCTGGATGGAGTTGGCACTGGAGCAGAAGAGCTTTTCAGTAGTAGAGCTGGA  
TGGAGTTGGTACTGGAGCAGAAGAGCTTTTCAGTGGTAGAGCTGGTTACTGGAGCAGAAGAGCTTTTCAGTAG  
TAGAGCTG

AGAAGAGCTTTTCAGTAGTAGAGCTGGATGGAGTTGGTACTGGAGCAGAAGAGCTTTTCAGTAGTAGAGCTGG  
ATGGAGTTGGTACTGGAGCAGAAGAGCTTTTCAGTGGTAGAGCTGGTTACTGGAGCAGAAGAGCTTTTCAGTG  
GTAGAGCT

GTACTGGAGCAGAAGAGCTTTTCAGTGGTAGAGCTGGTTACTGGAGCAGAAGAGCTTTTCAGTGGTAGAGCTG  
GTTACTGGAGCAGAAGAGCTTTTCAGTAGTAGAGCTGGATGGAGTTGGTACTGGAGCAGAAGAGCTTTTCAGT  
AGTAGAGC

GGAGCAGAAGAGCTTTTCAGTGGTGGAGCTTGATGGGGTTGGAGCTGGAGCAGAAGAGCTTTTCAGTAGTAGA  
GCTGGATGGAGTTGGTACTGGAGCAGAAGAGCTTTTCAGTGGTAGAGCTGGTTACTGGAGCAGAAGAGCTTTT  
CAGTAGTA

CAGAAGAGCTTTTCAGTAGTAGAGCTGGATGGAGTTGGTACTGGAGCAGAAGAGCTTTTCAGTGGTAGAGCTG  
GTTACTGGAGCAGAAGAGCTTTTCAGTAGTAGAGCTGGATGGAGTTGGTACTGGAGCAGAAGAGCTTTTCAGT  
GGTAGAGC

GAGAATCTAGCCACCGACAACACTTCTGATGGCAGCTCTCCGCAGGATGACCCAACAATGACTGATGGTGC  
AGACGAATCAGACACACCGTCGAACGAGCAAGAACTGTCTTAGATGAAAACATACCTTATCCAACACATC  
TACTATCT

AGACTCAGAGCGGATGGGTGGACAACATTTAAAGTAGGTGGCTCCGTCTGGGATCTGCTCTGCAGCAATAC  
ACAAATAGTGGAAACAAGTCTCTGTTGTGACTGGTAGCCCTGACGCACGTGCCTTTCTGATCAAGGGAATT  
GCTTTTCAT

AGCCTAGTTAATGGATTTATGCGGTATTCATTTTCGTAAACTTGACATCGTGTGACCTTTCATTGACAGTCA  
ACTGGAAGACATCTCCCCTAGCATAATGTCCGACAGGGTCAAGATCAAAGCGAGCTTCAGCAATCAAGTCA  
GTGTTAAT

TTTCAGTAGTAGAGCTGGATGGAGTTGGTACTGGAGCAGAAGAGCTTTCAGTGGTAGAGCTGGTTACTGGA  
GCAGAAGAGCTTTCAGTAGTAGAGCTTGATGGGGTTGGAGCTGGAGCAGAAGAGCTTTCAGTAGTAGAGCT  
TGATGGAG

CTTGCGGATTAGACTCAGAGCGGATGGGTGGACAACATTTAAAGTAGGTGGCTCCGTCTGGGATCTGCTCT  
GCAGCAATACACAAATAGTGGAAACAAGTCTCTGTGTGACTGGTAGCCCTGACGCACGTGCCTTTCTGAT  
CAAGGGAA

TCTCCGTGAGGGCGGTTCTTTCTGTAGCTGTTGGTTTTTTCCAGATCTTATGTGACACACCTGCACAACAA  
TGTCATTCTCTGTGACTGCAAGACTCCCAAGACCACGAAGCTGCTGGTATCTTCTATTTTCAGAGAGCGCT  
GTTGCTCT

CCGTGCGCGTCGTCGTCATCTTCGTGCTTGCCTCACCTTCCCTCTTCAGAATCCACATCCACGACCCTCAA  
CCGCATCGAGGGGTCTGCCTCAACACGGTCCACTTGAGGAAGTCTTCCCTCCCTTACTCTGCTGCGGCTAC  
TGGCCCTG

GTGGTAGAGCTGGTTACTGGAGCAGAAGAGCTTTCAGTAGTAGAGCTTGATGGGGTTGGAGCTGGAGCAGA  
AGAGCTTTCAGTAGTAGAGCTTGATGGAGTTGGTACTGGAGCAGAAGAGCTTTCAGTAGTAGAGCTTGATG  
GAGTTGGC

AGAGCTGGTTACTGGAGCAGAAGAGCTTTCAGTAGTAGAGCTTGATGGGGTTGGTACTGGAGCAGAAGAGC  
TTTCAGTGGTAGAGCTGGTTACTGGAGCAGAAGAGCTTTCAGTAGTAGAGCTGGATGGAGTTGGTACTGGA  
GCAGAAGA

GTAAGTGGAGCAGAAGAGCTTTCAGTAGTAGAGCTGGATGGAGTTGGTACTGGAGCAGAAGAGCTTTCAGTA  
GTAGAGCTGGATGGAGTTGGTACTGGAGCAGAAGAGCTTTCAGTGGTAGAGCTGGTTACTGGAGCAGAAGA  
GCTTTCAG

CTCTTCAGCTGCCTCCTCTTCTGCTTCTGAATCCTCTTCAGCTGCTTCTTCCCTCTGCTTTCAGAATCTTCTT  
CTGCTGCCTCCTCTTCTGCTTCTGAAGCTGCTAAGTCTTCTAGCTCTGCCAAGTCTTCTGGCTCTTCTGCT  
GCTTCATC

GTTACTGGAGCAGAAGAGCTTTCAGTAGTAGAGCTGGATGGAGTTGGTACTGGAGCAGAAGAGCTTTCAGT  
GGTAGAGCTGGTTACTGGAGCAGAAGAGCTTTCAGTGGTAGAGCTGGTTACTGGAGCAGAAGAGCTTTCAG  
TAGTAGAG

AAAGTGGCTTTGAACTCCAGTGAATGTTTGAACAAGATGTTCCCCACCGAGGAACAACCCTTGGCTTCGGC  
ACTCTTGCAATTCAGTGATGTGCAGGCTAAGATTGCTCAAGCTAGAATTCACAAGATACCTTGATTCAA  
CCAAATTC

AAGAGCTTTCAGTAGTAGAGCTTGATGGGGTTGGTACTGGAGCAGAAGAGCTTTCAGTGGTAGAGCTGGTT  
ACTGGAGCAGAAGAGCTTTCAGTAGTAGAGCTGGATGGAGTTGGTACTGGAGCAGAAGAGCTTTCAGTAGT  
AGAGCTTG

CGCTTACCATTAAGGATGTAGAGAATCTAGCCACCGACAACACTTCTGATGGCAGCTCTCCGCAGGATGAC  
CCAACAATGACTGATGGTGCAGACGAATCAGACACACCGTCAACGAGCAAGAACTGTCTTAGATGAAAA  
CATACTT

TGGAATTGAAGATGGAGCGGAGGAAGTGTGTTGCTAGAGGAAGATGGGGTTGGTACTGGTGTACAGAGC  
TTTCAGTGGTGGAGCTGGATACTGGAGCAGAAGAGCTTTCAGTAGTAGAGCTTGATGGGGTTGGTACTGGA  
ACAGAAGA

TACATCAACGAATCCGTCAACGAGTTTTCAAGAAGCGTGGCTTCCAAGTTGACAGAGTTGACTCATGCTAC  
ATCTGCGTCTGAGGCACAAAACATCTTAGTTGCTCCAGGCCCATCAAAGAACCAAGACGTTGAACTACG  
CCCTCAGT

GGTTACTGGAGCAGAAGAGCTTTTCAGTAGTAGAGCTGGATGGAGTTGGTACTGGAGCAGAAGAGCTTTTCAG  
TAGTAGAGCTGGATGGGGTTGGTACTGGAGCAGAAGAGCTTTTCAGTAGTAGAGCTGGATGGAGTTGGTACT  
GGAGCAGA

AGTTGGTACTGGAGCAGAAGAGCTTTTCAGTAGTAGAGCTGGATGGAGTTGGTACTGGAGCAGAAGAGCTTT  
CAGTGGTAGAGCTGGTTACTGGAGCAGAAGAGCTTTTCAGTGGTAGAGCTGGTTACTGGAGCAGAAGAGCTT  
TCAGTAGT

TGAGACATCAGAAGCTGAGGAAGAAGATTGACTGACAGAGCTTGATACATCAGAAGCTGAAGAAGAAGATT  
GACTGACAGAGCTTGAGACATCAGAAGTAGAGGAAGCTGATTGACTGACAGAGCTTGAGACATCAGAAGCT  
GAAGAAGA

CTCTAGTTTTGCGATAGTGTAGATACCGTCCTTGGATAGAGCACTGGAGATGGCTGGCTTTAATCTGCTGGA  
GTACCATGGGACACCGGTGATCATTCTGGTCACTTGGTCTGGAGAAATACCAGTCAACATGGTGGTGAAGT  
CACCGTAG

TGTCATCAAATCCACCAACAACACTGCTGTAATTGGTTCTTGTTCATTAGTTCCATGCCTCGTTGCAAGGGCA  
GAGGCTGCCCTCTGATGAGCGATCCTGGCTGAGGCCTCCTCTTGGAGACGCCCCATATTTTCATCACATTC  
TTGTTACG

AAGTGCAACAGATAATGCCGCAGTATTTATATCCACCAGGGATGGGACCACAAGCTCAGCTTCCTACAATG  
AGCTCAAACCTCGGAGTCCCAGACACCAGTGATGAGCTCACAGTTTTCTTCTTGAACCAGCATGGCCTTTA  
CCAACAAA

CATATCGTCGCCGTGCCCGTCGTCGTCATCTTCGTCGTTGCCCTCACCTTCCTCTTCAGAATCCACATCCA  
CGACCCTCAACCGCATCGAGGGGTCTGCCTCAACACGGTCCACTTGAGGAACTCTTCTCCCTTACTCTG  
CTGCGGCT

GGAAGATGGGGTTGGTACTGGTGCTACAGAGCTTTTCAGTAGTAGAGCTTGATGGGGTTGGTACTGGAGCAG  
AAGAGCTTTTCGGTAGTAGAGCTGGATGGAGTTGGCACTGGAGCAGAAGAGCTTTTCAGTAGTAGAGCTGGAT  
GGAGTTGG

TAGAGCTTGATGGAGTTGGCACTGGAGCAGAAGAGCTTTTCAGTGGTGGAGCTGGTTACTGGAGTAGAAGAG  
CTTTTCAGTAGTAGAGCTGGATGGAGTTGGTACTGGAGCAGAAGAGCTTTTCAGTGGTAGAGCTGGTTACTGG  
AGCAGAAG

CGTTCTCCCTAATGTTAACTTGCATATCTGTGTCCACAATACCTGGGGCGACGGCAATGGCTTTCACTTGC  
CTTTCCTCGTTGGCCAGAGTCATGGCGAAGTGGTTTCAGAGCGGCTTTTGAAGAACCGTAAGCTCCCCAAT  
GCTGAAGT

GAGTTGGTACTGGAGCAGAAGAGCTTTTCAGTGGTAGAGCTGGTTACTGGAGCAGAAGAGCTTTTCAGTAGTA  
GAGCTGGATGGAGTTGGTACTGGAGCAGAAGAGCTTTTCAGTGGTAGAGCTGGTTACTGGAGCAGAAGAGCT  
TTCAGTGG

AGTAGAAAAGCTTTTCAGTAGTAGAGCTGAATGGAATTGAAGATGGAGCGGAGGAAGTGATGTTGCTAGAGG  
AAGATGGGGTTGGTACTGGTGCTACAGAGCTTTTCAGTGGTGGAGCTGGATACTGGAGCAGAAGAGCTTTCA  
GTAGTAGA

ACGTACTGTGTTCTCTTGATCGTAGTCCAAAGACTTCAAACCTGACTTCTGGGAAGTTACAGAACCGACAG  
AGTTACCTTCATTGATGATTTGGACAATGCAGTAGCCACCTCAATACCGATTGAACCTTTGAGCTTCTTCT  
GTAGAGCC

TAGATGGGGATCAGAATTGGTAGCACCGTGCACAGGTGAGGGGCAGTGTGATAAGATGTTTACGCTCGTT  
GAGTGCCTCGATGACCAGATCCAGTTGTGCCTTGGAGAACTCCCAGAAGGCCTTCTCTAAGTACCGCACCC  
CACCGTGA

AGTTGATGAGCACGGTGATGAATAATACACCTACAACAGTTGCCGCATTGGCTGCGGTTGCTGCAGCCTCT  
GAAACAAATGGAAAGCTGGGGTCCGAGGAACAACCTGAAATCACTATTCCAAAGCCGAGGAGTAGTGCACA  
GTTGGAGC

CCGCAACCACAAGTGCAACAGATAATGCCGCAGTATTTATATCCACCAGGGATGGGACCACAAGCTCAGCT  
TCCTACAATGAGCTCAAACCTCGGAGTCCCAGACACCAGTGATGAGCTCACAGTTTCTTTCTTGAACCAGC  
ATGGCCTT

CCGGCAAAGAAATCGTAGAATTTACAGCCCATATAGATGTACGGGACCTGCCAGGTGCTGTAGATGGGGAT  
CAGAATTGGTAGCACCGTGCACAGGTGAGGGGCAGTGTGATAAGATGTTTACGCTCGTTGAGTGCCTCGA  
TGACCAGA

ATGGAGTTGGTACTGGAGCAGAAGAGCTTTCAGTGGTAGAGCTGGTTACTGGAGCAGAAGAGCTTTCAGTA  
GTAGAGCTGGATGGAGTTGGTACTGGAGCAGAAGAGCTTTCAGTAGTAGAGCTGGATGGAGTTGGTACTGG  
AGCAGAAG

AGCAGAAGAGCTTTCAGTGGTAGAGCTGGTTACTGGAGCAGAAGAGCTTTCAGTGGTAGAGCTGGTTACTG  
GAGCAGAAGAGCTTTCAGTGGTAGAGCTGGTTACTGGAGCAGAAGAGCTTTCAGTAGTAGAGCTGGATGGA  
GTTGGTAC

GGTGGAGCTTGATGGGGTTGGAGCTGGAGCAGAAGAGCTTTCAGTAGTAGAGCTGGATGGAGTTGGTACTG  
GAGCAGAAGAGCTTTCAGTGGTAGAGCTGGTTACTGGAGCAGAAGAGCTTTCAGTAGTAGAGCTGGATGGA  
GTTGGTAC

GCTGGTTACTGGAGCAGAAGAGCTTTCAGTAGTAGAGCTGGATGGAGTTGGTACTGGAGCAGAAGAGCTTTC  
CAGTAGTAGAGCTGGATGGAGTTGGTACTGGAGCAGAAGAGCTTTCAGTAGTAGAGCTGGATGGAGTTGGT  
ACTGGAGC

GTAGAGCTTGATGGGGTTGGTACTGGAGCAGAAGAGCTTTCGGTAGTAGAGCTGGATGGAGTTGGCACTGG  
AGCAGAAGAGCTTTCAGTAGTAGAGCTGGATGGAGTTGGTACTGGAGCAGAAGAGCTTTCAGTGGTAGAGC  
TGGTTACT

TGAAAGTACAGGTAGATGTTAGTAAGGACGTAGAAGAAGGCAGCCTCAATGCTCTGCCTCCATCTGGAATC  
ACAGAATCAGACGACAAAGCTGAAAAGTTCACTAAACATCCTGAATCTAGTTTAGAAGAGCTACAGAAGCA  
TCAAGAAC

AGAGCTTTCAGTAGTAGAGCTGGATGGGGTTGGTACTGGAGCAGAAGAGCTTTCAGTAGTAGAGCTGGATG  
GAGTTGGTACTGGAGCAGAAGAGCTTTCAGTGGTAGAGCTGGTTACTGGAGCAGAAGAGCTTTCAGTAGTA  
GAGCTTGA

TGGAGCAGAAGAGCTTTCAGTGGTAGAGCTGGTTACTGGAGCAGAAGAGCTTTCAGTAGTAGAGCTGGATG  
GAGTTGGTACTGGAGCAGAAGAGCTTTCAGTGGTAGAGCTGGTTACTGGAGCAGAAGAGCTTTCAGTGGTA  
GAGCTGGT

GAAACTCATGGATACGTGGTCCGTTTCATTGTGAAAGGATCACTGAGTTGCCACTTTGAGTTTTCGTCAATC  
ACAGGAGCGTCTGGTAGACCAGCAACCTTGGAGTACAAGCTTCCCACATCAATTCTAAAGCCGTCTACACC  
ATGGTCTA

GGAGTTGGTACTGGAGCAGAAGAGCTTTCAGTGGTAGAGCTGGTTACTGGAGCAGAAGAGCTTTCAGTAGT  
AGAGCTTGATGGGGTTGGAGCTGGAGCAGAAGAGCTTTCAGTAGTAGAGCTTGATGGAGTTGGTACTGGAG  
CAGAAGAG



AGCAGCTCAATGTTTCGACCTAATCTTGTAAATGCTGGTCTGAACGACAGTTGCGACAGCAGCTCGTGTGAGGG  
TCGCTGGCGATGTGCCAGCGCATTCCCCACATTTCCATGAACGCATAATCTTCCACATACTACCGTGAA  
GGCGTCTT

CCGCCGTTAAACCTGAAGAACATTGTCTGTTTAAAGCGACAAATGGCGTCGAGTAGGGAATCCCCTTGCC  
AAGCATGCAGCCCTGTGTTCTGTAGCACCGGCTCCAACATTGAGAACATTTCCACAGGCAACTTCTTCGAT  
TAAGTTCA

AGCTTTCAGTGGTAGAGCTGGTTACTGGAGCAGAAGAGCTTTCAGTAGTAGAGCTGGATGGAGTTGGTACT  
GGAGCAGAAGAGCTTTCAGTGGTAGAGCTGGTTACTGGAGCAGAAGAGCTTTCAGTAGTAGAGCTGGATGG  
AGTTGGTA

AGCTTTCAGTGGTAGAGCTGGTTACTGGAGCAGAAGAGCTTTCAGTAGTAGAGCTGGATGGAGTTGGTACT  
GGAGCAGAAGAGCTTTCAGTGGTAGAGCTGGTTACTGGAGCAGAAGAGCTTTCAGTGGTAGAGCTGGTTAC  
TGGAGCAG

GACTTTCCTCAGATAGTCTTGATAATGGAATCCAAGTACTGACCTGAAGTTGTTAACTACCTCAACTTCCA  
CCGCCCTCCTCCACCTCCCCCTCCTCCACTTCCACAGTCTCTTTTACTGAAGCAGAAGCTAAACCGGA  
TGGTGT

CTTGAGACATCAGAAGCTGAGGAAGAAGATTGACTGACAGAGCTTGATACATCAGAAGCTGAAGAAGAAGA  
TTGACTGACAGAGCTTGGAGACATCAGAAGTAGAGGAAGCTGATTGACTGACAGAGCTTGGAGACATCAGAAG  
CTGAGGAA

GTAGTAGAGCTGGATGGGGTTGGTACTGGAGCAGAAGAGCTTTCAGTAGTAGAGCTGGATGGAGTTGGTAC  
TGGAGCAGAAGAGCTTTCAGTGGTAGAGCTGGTTACTGGAGCAGAAGAGCTTTCAGTAGTAGAGCTTGATG  
GGTTGGA

AGTAGTAGAGCTTGATGGGGTTGGTACTGGAGCAGAAGAGCTTTCAGTGGTAGAGCTGGTTACTGGAGCAG  
AAGAGCTTTCAGTAGTAGAGCTGGATGGAGTTGGTACTGGAGCAGAAGAACTTTCAGTAGTAGAGCTTGAT  
GGGGTTGG

TAGACACTTCGAGACCAGATCTTGAATGGCAAGAATTGACTTCATTCTCATCACAACTGGAACCGTTG  
TCGATACAGAAGAGCCAGACCTTGCATTGCAGATGTTGAGACAAAGTTAGAAACAAAAGTCGATGAGCT  
AAGGTACC

TTTAAACAGGTAGAGTTATTTCGTAACCAAAGAAAGGGTGCTGGTTCTATCTTCACCTCTCACACCAGATTA  
AGACAAGGTGCTGCCAAGTTGAGAACTTTGGACTATGCTGAACGTCATGGTTACATCCGTGGTATCGTTAA  
GCAAATTG

TTTGTGGTTTGCTTATGTAAGTTAGAGATGGCGATTCTAGCGGCTAGAGTGGCATAATCAGGGTGCACAGT  
GGTCATGTATGCACATGTTTCAGCTGCAAGATTGTCCAGCTCAACGGTAGTAACACCGGAGTACACACCAG  
AAATAATA

TCAGTAGTAGAGCTGGATGGAGTTGGTACTGGAGCAGAAGAGCTTTCAGTAGTAGAGCTGGATGGAGTTGG  
TACTGGAGCAGAAGAGCTTTCAGTGGTAGAGCTGGTTACTGGAGCAGAAGAGCTTTCAGTGGTAGAGCTGG  
TTACTGGA

TCAGTAGTAGAGCTGGATGGAGTTGGTACTGGAGCAGAAGAGCTTTCAGTGGTAGAGCTGGTTACTGGAGC  
AGAAGAGCTTTCAGTAGTAGAGCTGGATGGAGTTGGTACTGGAGCAGAAGAGCTTTCAGTGGTAGAGCTGG  
TTACTGGA

GCTGTTTCATCTGCTGCCTTAGCCAAGAATGAGAAAATCTCTGATGCCGCTGCATCTGCCACTGCCTCAAC  
ATCTCAAGGGGCATCCTCCTCCTCCTCCTCCTCGGCAACTTCTACCCTAGAAAGCAGCTCTGTTTCTT  
CATCTAGT

CCAACGAAGAAATCAAATTAGAACTGCTAGATTTTGAATCTGACGAAGGTAAGAAGGTCTTTTGGCATTCCG  
TCTGCCACGTCTTGGGTGAATCTTGTGAGTGCCACCTAGGTGCCCATATTTGTTTAGGTCCTCCAAGTGA  
TGATGGGT

GAGCTTTTCAAGTGGTAGAGCTGGTTACTGGAGCAGAAGAGCTTTTCAAGTAGTAGAGCTGGATGGAGTTGGTAC  
TGGAGCAGAAGAGCTTTTCAAGTGGTAGAGCTGGTTACTGGAGCAGAAGAGCTTTTCAAGTGGTAGAGCTGGTTA  
CTGGAGCA

ACTGCTGTAATTGGTTCTTGTTCATTAGTTCCATGCCTCGTTGCAAGGGCAGAGGCTGCCCTCTGATGAGC  
GATCCTGGCTGAGGCCTCCTCTTGGAGACGCCCCATATTTTATCACATTCTTGTACGAGGTAGTTCTTC  
CTCTTCTT

TAGAGCAACAATTGGTGAGGAGTAACCTTCCACCTTAGTAGTTGGAGACTGAACTGCACCGAAAAGAGCAC  
CTTGACATTGTTCTTCAACACTTTAACAGTCTCATCAGGCAACGCCTTTTCTGTTTCTTGGAAATGTTTGG  
AAACCGGC

GAACAATCTGAGTTGATGAGCACGGTGATGAATAATACACCTACAACAGTTGCCGCATTGGCTGCGGTTGC  
TGCAGCCTCTGAAACAAATGGAAAGCTGGGGTCCGAGGAACAACCTGAAATCACTATTCCAAAGCCGAGGA  
GTAGTGCA

CTTACGCCATTGTCTCATCACTACAACCTGTTTAGCTACTAACTTGCTTGACATCCAAAGAGCAGGCCAATC  
ACTAGAGAATGTCTGGGATCACTCAGATGGGTACACACAAGGCAGTGGATGTGGTTGTTACCGCCACGACT  
AGGGTCAC

TAGAGTTATTTCGTAACCAAAGAAAGGGTGCTGGTTCTATCTTACCTCTCACACCAGATTAAGACAAGGTG  
CTGCCAAGTTGAGAACTTTGGACTATGCTGAACGTCTATGGTTACATCCGTGGTATCGTTAAGCAAATTGTC  
CAGACTC

GAGCTGGATGGAGTTGGTACTGGAGCAGAAGAGCTTTTCAAGTGGTAGAGCTGGTTACTGGAGCAGAAGAGCT  
TTCAGTGGTAGAGCTGGTTACTGGAGCAGAAGAGCTTTTCAAGTAGTAGAGCTTGATGGGGTTGGTACTGGAG  
CAGAAGAG

AGAAGAGCTTTTCAAGTAGTAGAGCTGGATGGAGTTGGTACTGGAGCAGAAGAGCTTTTCAAGTGGTAGAGCTGG  
TTACTGGAGCAGAAGAGCTTTTCAAGTAGTAGAGCTGGATGGAGTTGGTACTGGAGCAGAAGAGCTTTTCAAGT  
GTAGAGCT

TACTGGAGCAGAAGAGCTTTTCAAGTGGTAGAGCTGGTTACTGGAGCAGAAGAGCTTTTCAAGTGGTAGAGCTGG  
TTACTGGAGCAGAAGAGCTTTTCAAGTAGTAGAGCTGGATGGAGTTGGTACTGGAGCAGAAGAGCTTTTCAAGT  
GTAGAGCT

GAAGAGCTTTTCAAGTGGTAGAGCTGGTTACTGGAGCAGAAGAGCTTTTCAAGTGGTAGAGCTGGTTACTGGAGC  
AGAAGAGCTTTTCAAGTAGTAGAGCTGGATGGAGTTGGTACTGGAGCAGAAGAGCTTTTCAAGTGGTAGAGCTGG  
TTACTGGA

CAGTGGTAGAGCTGGTTACTGGAGCAGAAGAGCTTTTCAAGTAGTAGAGCTGGATGGAGTTGGTACTGGAGCA  
GAAGAGCTTTTCAAGTAGTAGAGCTGGATGGAGTTGGTACTGGAGCAGAAGAGCTTTTCAAGTAGTAGAGCTGGA  
TGGAGTTG

GATGGAGCGGAGGAAGTGATGTTGCTAGAGGAAGATGGGGTTGGTACTGGTGCTACAGAGCTTTTCAAGTGGT  
GGAGCTGGATACTGGAGCAGAAGAGCTTTTCAAGTAGTAGAGCTTGATGGGGTTGGTACTGGAACAGAAGAGC  
TTTTCAAGT

TAGCACCGTGCACAGGTGAGGGGCAGTGGTATAAGATGTTTACGCTCGTTGAGTGCCTCGATGACCAGAT  
CCAGTTGTGCCTTGGAGAAGTCCCAGAAGGCCTTCTTAAGTACCGCACCCACCGTGAATCATCTTGGTA  
GATTTGGA

TGGAGCAGAAGAGCTTTTCAGTGGTAGAGCTGGTTACTGGAGCAGAAGAGCTTTTCAGTGGTAGAGCTGGTTA  
CTGGAGCAGAAGAGCTTTTCAGTAGTAGAGCTTGATGGGGTTGGTACTGGAGCAGAAGAGCTTTTCAGTGGTA  
GAGCTGGT

GTGGTAGAGCTGGTTACTGGAGCAGAAGAGCTTTTCAGTGGTAGAGCTGGTTACTGGAGCAGAAGAGCTTTTC  
AGTGGTAGAGCTGGTTACTGGAGCAGAAGAGCTTTTCAGTGGTAGAGCTGGTTACTGGAGCAGAAGAGCTTTTC  
CAGTAGTA

ACTGGAGCAGAAGAGCTTTTCAGTAGTAGAGCTTGATGGGGTTGGTACTGGAGCAGAAGAGCTTTTCAGTGGT  
AGAGCTGGTTACTGGAGCAGAAGAGCTTTTCAGTAGTAGAGCTGGATGGAGTTGGTACTGGAGCAGAAGAAC  
TTTCAGTA

AGTATCATAACAGTTCTTCTATCCGATATATAATGAACGATAGGTGTGACACCACTGACTTGAGTAATTCTT  
TCCAGCCACGCAAGCAAGACACCCCTTGTCTGGCCCTGAGGTACGGACATTCCTTTGTAGAGATACTT  
TACCAGCA

TATACAAGACACGTAAGTGTGTTCTTCTGATCGTAGTCCAAAGACTTCAAAGTACTTCTGGGAAGTTTACA  
GAACCGACAGAGTTACCTTCATTGATGATTTGGACAATGCAGTAGCCACCTCAATACCGATTGAACCTTTG  
AGCTTCTT

CTGTTGTAACAAGGGTGGTAGCTTTCAGTAGTGTATTCCAGTACCAGTTGAACAAGGAACAGTGGTTGTG  
ACAGTCTTTGGAGAGCATCCAGAGGTAGTTTACCAGGAGAGTTTGTACCTGTAGAGCAAACCGTAGTAGT  
AATAGTGG

TGCGTCCATTCTTCTGCACCAGCAAGCTTAATATCTCTTGTGTGACAAGGTTTCAGGTTGTGGAATCCGCC  
AACTTCGACAACCTTTGTGACTGTTTCTCAGCCATTTGTCTGTAAGTAGTCCATTTACCACCTGCAATAG  
TAATTAGG

TCAGTGGTAGAGCTGGTTACTGGAGCAGAAGAGCTTTTCAGTGGTAGAGCTGGTTACTGGAGCAGAAGAGCT  
TTCAGTAGTAGAGCTGGATGGAGTTGGTACTGGAGCAGAAGAGCTTTTCAGTAGTAGAGCTGGATGGGGTTG  
GTACTGGA

GAGCTGGATGGAGTTGGTACTGGAGCAGAAGAGCTTTTCAGTGGTAGAGCTGGTTACTGGAGCAGAAGAGCT  
TTCAGTAGTAGAGCTGGATGGAGTTGGTACTGGAGCAGAAGAGCTTTTCAGTGGTAGAGCTGGTTACTGGAG  
CAGAAGAG

TATTGGTGGTAAACATGAAATGTGAAGACGTTGCCCTCGTCATAGGTAAGCGGTGGTCATCACAACCATC  
AGCGGTGACAATAACACAGCAAACAGTCTTGTCTGACTCTCCTGCCTGCATGGTGTGAAAGTGAATCGT  
CAGGATTT

TGCTGAAGCTGTTTTCAACTATGGTGACTTACCACCATGTTGACTGGTATTCCAGCTGAACAAGTCACCA  
GAGTTATCACTGGTGTTCATGGTACTCTACCAGATTGAGACCAGCTATCTCCAGTGCTCTATCTAAGGAC  
GGTATTTA

TTCAGGAGCTTCAGAAGTGACAGTCTTGGTCTTACATCCATTGTCATCACAGTGGGTGACGGTGGCAGTGG  
TGTACGATTGAGAAGAAACAGTAGTTGTGGTGGTAGCTTTCAGGAGCTTCAGAGGTGACAGTCTTGGTGTTA  
CAGCCATT

ACGGTAATGACTACTATCTTGGTACATCTATGATATGATGCAGCAGAGACTGAAGCCTCAGGTGGTGACT  
GTTATGGGTGATCTTTTCTCCAGTCAATGGATCGGTGATTCCGAATTCATAATAGAACGAAAAGGTATAT  
TAGCAGAA

TTGGTTCTTGTTCATTAGTTCCATGCCTCGTTGCAAGGGCAGAGGCTGCCCTCTGATGAGCGATCCTGGCT  
GAGGCCTCCTCTTGGAGACGCCCCATATTTTCATCACATTTCTTGTACGAGGTAGTTCTTCTCTTCTTGC  
TCCTCGTT

GAATGCCCTGTCTTACTCAACAATTCCAATACTGATAGATGAGGGTCAAGTAAGCCTTTGTCTTCCCAGT  
TTGTGCTTCAGAGCATGTGTGAATAGTCGTTGACGAGGAATCAGGTGGCATGCTTTTAGATGAGGATCCTT  
TACCTTCC

TCATCGACTTGAGAATACCACAAAGATCTGCAATAAATCACATTGTGGCTCCGAACTTAGTGAATGTGGAT  
CCAACTTGTGTGGGACAAGCAGACGAACACACCTATCTACAAGGATGACATATTGGAACATTTACTGAA  
GGAGAATG

TCAGAATTGGTAGCACCGTGCACAGGTGAGGGGCAGTGTGATAAGATGTTTACGCTCGTTGAGTGCCTCG  
ATGACCAGATCCAGTTGTGCCTTGGAGAACTCCCAGAAGGCCTTCTCTAAGTACCGCACCCACCGTGAAT  
CATCTTGG

CGGGTGGTCATCACAACCATCAGCGGTGACAATAACACAGCAAACAGTCTTGTGTTGACTCTCCTGCCTGCA  
TGGTGTGTTGAAAGTGAATCGTCAGGATTTGCAACAACCAATAGTGTACTGCTATTTCGAGGAGCACAAGCT  
CGCCGGTG

TTTCAGTGGTAGAGCTGGTTACTGGAGCAGAAGAGCTTTTCAGTAGTAGAGCTTGATGGGGTTGGTACTGGA  
GCAGAAGAGCTTTTCAGTGGTAGAGCTGGTTACTGGAGCAGAAGAGCTTTTCAGTAGTAGAGCTGGATGGAGT  
TGGTACTG

TGGTAGAGCTGGTTACTGGAGCAGAAGAGCTTTTCAGTGGTAGAGCTGGTTACTGGAGCAGAAGAGCTTTCA  
GTAGTAGAGCTTGATGGGGTTGGTACTGGAGCAGAAGAGCTTTTCAGTGGTAGAGCTGGTTACTGGAGCAGA  
AGAGCTTT

AGCTGGATGGAGTTGGTACTGGAGCAGAAGAGCTTTTCAGTGGTAGAGCTGGTTACTGGAGCAGAAGAGCTT  
TCAGTAGTAGAGCTGGATGGAGTTGGTACTGGAGCAGAAGAGCTTTTCAGTGGTAGAGCTGGTTACTGGAGC  
AGAAGAGC

CAGTGGTAGAGCTGGTTACTGGAGCAGAAGAGCTTTTCAGTGGTAGAGCTGGTTACTGGAGCAGAAGAGCTT  
TCAGTAGTAGAGCTGGATGGAGTTGGTACTGGAGCAGAAGAGCTTTTCAGTGGTAGAGCTGGTTACTGGAGC  
AGAAGAGC

GAAGGCCCCACGTTCTCCCTAATGTTAACTTGCATATCTGTGTCCACAATACCTGGGGCGACGGCAATGGC  
TTTCACTTGCCTTTCTCGTTGGCCAGAGTCATGGCGAAGTGGTTTCAGAGCGGCTTTTGAAGAACCGTAAG  
CTCCCCAA

TGGAGTTGGCACTGGAGCAGAAGAGCTTTTCAGTGGTAGAGCTGGTTACTGGAGTAGAAGAGCTTTTCAGTAG  
TAGAGCTGGATGGAGTTGGTACTGGAGCAGAAGAGCTTTTCAGTGGTAGAGCTGGTTACTGGAGCAGAAGAG  
CTTTTCAGT

ATGTTCAAGTCTAGAGAACGTTCTTATAGAGAATTGCCATGGAGAGTTGCAGACTTTCGGTGTATCCACAG  
AAATGAATTTTTCTGGTGCCTTGTCTGGTTTACTCGTGTGTCAGAAGATTCCAACAAGATGATGCTCATATCT  
TCTGTACC

AGAGCTTTTCAGTGGTAGAGCTGGTTACTGGAGCAGAAGAGCTTTTCAGTAGTAGAGCTTGATGGGGTTGGAG  
CTGGAGCAGAAGAGCTTTTCAGTAGTAGAGCTTGATGGAGTTGGTACTGGAGCAGAAGAGCTTTTCAGTAGTA  
GAGCTTGA

TCATAGGTAAGCGGTGGTCATCACAACCATCAGCGGTGACAATAACACAGCAAACAGTCTTGTGTTGACTCT  
CCTGCCTGCATGGTGTGTTGAAAGTGAATCGTCAGGATTTGCAACAACCAATAGTGTACTGCTATTTCGAGG  
AGCACAAG

AGGTTTGGACGCCGTACGTGTCTATTGTGGGGTGTGCTTCTATGCTGTGCTGCTTTGCTGTCTTTGCCTC  
CGTTGGTGTGACAAAGCTGTGGCCTCAAGGAAGCAGTCACCAAGACATTACTTCTCAGGGTGCCGGTAAC  
GTATGATT

AGTAGAAGCGGATGAGGTTGATTGAGGGAATGAGCTTGAGCTACCAGAAGCGGATGAGACTGATTGGCTGC  
CAGAGCTTGAGACACCAGAAGTAGAGGAAGCTGATTGACTGACAGAGCTTGAGACATCAGAAGTAGAGGAA  
GCTGATTG

ACCAGGAACGTTACGATGAATATACAAGACACGTA CTGTGTTCTCTTGATCGTAGTCCAAAGACTTCAAAC  
TGACTTCTGGGAAGTTCACAGAACCACAGAGTTACCTTCATTGATGTATTTGGACAATGCAGTAGCCACC  
TCAATACC

CTTTCAGTAGTAGAGCTTGATGGAGTTGGCACTGGAGCAGAAGAGCTTTCAGTGGTGGAGCTGGTTACTGG  
AGTAGAAGAGCTTTCAGTAGTAGAGCTGGATGGAGTTGGTACTGGAGCAGAAGAGCTTTCAGTGGTAGAGC  
TGGTTACT

GAGCTTTCAGTGGTAGAGCTGGTTACTGGAGCAGAAGAGCTTTCAGTGGTAGAGCTGGTTACTGGAGCAGA  
AGAGCTTTCAGTAGTAGAGCTTGATGGGGTTGGTACTGGAGCAGAAGAGCTTTCAGTGGTAGAGCTGGTTA  
CTGGAGCA

CCTTTAGCAACCAAAGGTAAAACCTCGTTACACTTACTCAACTGGAACGAGATCAACCAGTCTTCAATGAAG  
TCAGCAACGAACTCCCTCTGCAAAGCAGAATAGTCCTTCTTGAACGCAGGTCCGGAGCGATAGTCTCCGTC  
GCTGCGAC

TGGTACTGGAGCAGAAGAGCTTTCAGTAGTAGAGCTGGATGGAGTTGGTACTGGAGCAGAAGAGCTTTCAG  
TGGTAGAGCTGGTTACTGGAGCAGAAGAGCTTTCAGTAGTAGAGCTTGATGGGGTTGGAGCTGGAGCAGAA  
GAGCTTTC

GAGCTGGAGCAGAAGAGCTTTCAGTAGTAGAGCTGGATGGAGTTGGTACTGGAGCAGAAGAGCTTTCAGTG  
GTAGAGCTGGTTACTGGAGCAGAAGAGCTTTCAGTAGTAGAGCTGGATGGAGTTGGTACTGGAGCAGAAGA  
GCTTTCAG

GTTGGCACTGGAGCAGAAGAGCTTTCAGTAGTAGAGCTGGATGGAGTTGGTACTGGAGCAGAAGAGCTTTC  
AGTGGTAGAGCTGGTTACTGGAGCAGAAGAGCTTTCAGTAGTAGAGCTGGATGGAGTTGGTACTGGAGCAG  
AAGAGCTT

GAGCAGAAGAGCTTTCAGTAGTAGAGCTGGATGGAGTTGGTACTGGAGCAGAAGAGCTTTCAGTGGTAGAG  
CTGGTTACTGGAGCAGAAGAGCTTTCAGTAGTAGAGCTGGATGGAGTTGGTACTGGAGCAGAAGAGCTTTC  
AGTAGTAG

TAGAGCTTGATGGGGTTGGAGCTGGAGCAGAAGAGCTTTCAGTAGTAGAGCTTGATGGAGTTGGTACTGGA  
GCAGAAGAGCTTTCAGTAGTAGAGCTTGATGGAGTTGGCACTGGAGCAGAAGAGCTTTCAGTGGTGGAGCT  
GGTTACTG

ATCCCACCAATTCGGTAGCCTGAGGCTGGTTAAACGCCATTTGCTGTTGTGGTTGAGGCTGGCCTTGGGG  
CTGGTTTTGAAGACTGACCTTGCTGCTGCTGCGGGTAGAATCCATTTGGTTGTTGCTGCTGTTGCTGCTGTT  
GCTGCTGG

ACTCATGCTACATCTGCGTCTGAGGCACAAAACATCTTAGTTGCTCCAGGCCCATCAAAGAACCCAAGAC  
GTTGAACTACGCCCTCAGTAAAGTGGCTTTGAACTCCAGTGAATGTTTGAACAAGATGTTCCCCACCGAGG  
AACAAACC

TGGTCTAAGGGAGCTTGGTTTTGCGGTTGAAGGTAAAATCCTGTTTGCTGCGGCTTCAAAGGTTGCAAGG  
ACTGTGCTTGCTGAGGAGGTGGCACCTGTTGAGGTTGAGATTGATAATAACCAGTGCCCTGGGCCTGAAGG  
GGCTGCTG

GAATTTGATACTGCTAAGAAGCGTTTTGAAGAGGCAGTGGATCGTAATGAGAAGGAGCTCTTGTCCACGGT  
GATGAGAGAGAAGAAGGCCGCTCTGGACAGAGCATCCATTGAGTACGAAAGGTACGGGAGAGCCAGAGACT  
TTAATGAG

AACCGGAGGCAGTAGAAGCGGATGAGGTTGATTGAGGGAATGAGCTTGAGCTACCAGAAGCGGATGAGACT  
GATTGGCTGCCAGAGCTTGAGACACCAGAAGTAGAGGAAGCTGATTGACTGACAGAGCTTGAGACATCAGA  
AGTAGAGG

ACGGGACCTGCCAGGTGCTGTAGATGGGGATCAGAATTGGTAGCACCGTGCACAGGTGAGGGGCAGTGTG  
ATAAGATGTTTACGCTCGTTGAGTGCCTCGATGACCAGATCCAGTTGTGCCTTGGAGAACTCCCAGAAGGC  
CTTCTCTA

TTTTTCCTCATTAAACAGGTAGAGTTATTCGTAACCAAAGAAAGGGTGCTGGTTCTATCTTCACCTCTCA  
CACCAGATTAAGACAAGGTGCTGCCAAGTTGAGAACTTTGGACTATGCTGAACGTCATGGTTACATCCGTG  
GTATCGTT

AACATCTTAGTTGCTCCAGGCCCATCAAAGAACCCAAGACGTTGAACTACGCCCTCAGTAAAGTGGCTTT  
GAACTCCAGTGAATGTTTGAACAAGATGTTCCCCACCGAGGAACAACCCTTGGCTTCGGCACTCTTGCAAT  
TCAGTGAT



TTC AAGT GATTTTAACTTTACGCGGTTGAAGAATGCTGTGTTTCGA ACTATAAAGCGTCAGAAAAGATGGTT  
TAGCGAAGGCACCATTATGAAGATAGACACATTCTTCTTTTTTTTTTTTTTTTTTTTTTTTTTTTTTTTTTTTTTTTT  
TTCATTTA

CGCGCCGCGCAGGTACCCCGCGCATCTCTTCTTCTCGAAGAAAGCGGAAAAAACAAAAAAAAGTATAAA  
TAGTGGAGTCTTTTCCCATTAAACATTTAGAAAAAAATTCGAATGGAAATTTCTTGCCGAACATTTAACCG  
GAGACCCT

TTTAACTTTACGCGGTTGAAGAATGCTGTGTTTCGA ACTATAAAGCGTCAGAAAAGATGGTTTAGCGAAGGC  
ACCATTATGAAGATAGACACATTCTTCTTTTTTTTTTTTTTTTTTTTTTTTTTTTTTTTTTTTTTTTTTTTCA  
TTTACTTTTATTTTC

GTGTTGTTTGCAGGATATAAATCAAAAAAAAAAAAAAAAAAAAAAAAAAATTAATAAATAAATAAATAAATA  
CAATGATATCGATAACGGTGAATTTCTTTTCATGGATTTTTGTTGCCCAAGAAAATAACAATAACGTTTTTC  
TTTATGAT

GTTTCTTTTTTTTTTTTTTTTTTCGCGCGACTACTCAGCCATCTTGCATTTTTAAAGAAAAAGATAATCATTA  
ATGCCTTCACGGGAATACGTATAGAACATTATTAAGTATATGAATGGCATATATATATAGAACACCACC  
CTTGAAA

GTGTTAGTTGTAACCTTATGAAATATCGATTTAAATTCGAAGTGTGTTTGCAGGATATAAATCAAAAAAAA  
AAAAAAAAAAAAAAAAAATTAATAAATAAATAAATAAATAACAATGATATCGATAACGGTGAATTTCTTTTC  
ATGGATTT

CTATACCAATCACTTTTTTCAATTTTTTTTCAAAAGCTCATCGGAAAATTTTTCAAAAAAAAAAAAAAAAAAAA  
AAAAAGGTTTATTACCCTACTGCATTTTGATAATCTGAACATAATGAGCTAATGAAAGCAATTCTCATTTA  
AAAACAAG

ACCTTTTATGTAATGATTTAAGTCTTGTACATGACATAATAATAAATAATTTTAAAAATATAAAATATTT  
TTAATAGTTTTTAAATATTTTACAGTTTATTTTTTAAATTTATTTATATGTTTTTGTTCGGAAGCAGTC  
AAAGTATT

TTTTTTTTTTTTTTTTTCAATTTACTTTTTATTTTCGCGCGGTCGGTAAATTTTTTCGTGGGTTTTCTTTGA  
ATCTATTAGCCGACATAAGAATAATGCATAAATAATTTTTTAAATGTCTTCCTATGCCCAAAAGAAGAAGTCTT  
GAAGTTGCCGCA

TCCTAACCGCCGCGCCGCGCAGGTACCCCGCGCATCTCTTCTTCTCGAAGAAAGCGGAAAAAACAAAAAAA  
AAAGTATAAATAGTGGAGTCTTTTCCCATTAAACATTTAGAAAAAAATTCGAATGGAAATTTCTTGCCGAA  
CATTTAAC

TTTTTAAGAATGTCGGGTAATAAACAGATTGTTTTTCTGGGAGGATAATCTTTTCTTTTTCTGTGGTA  
TTCTAAAATTAACCTTGCTGTTTCTTTTTTTTTTTTTTTTTTTCGCGCGACTACTCAGCCATCTTGCATTTTTA  
AAGAAAA

ACATTGCTTTTTTATTCAAGATTATTGGTTTTTCTAACCGCCGCGCCGCGCAGGTACCCCGCGCATCTCTTC  
TTCTCGAAGAAAGCGGAAAAAACAAAAAAAAGTATAAATAGTGGAGTCTTTTCCCATTAAACATTTAGA  
AAAAAATT

TAATGATTTAAGTCTTGTACATGACATAATAATAAATAATTTTAAAAATATAAAATATTTTTAATAGTTT  
TTAAATATTTTACAGTTTATTTTTTAAATTTATTTATATGTTTTTGTTCGGAAGCAGTCAAAGTATTTT  
AATTTTCG

CACTTTTTTCAATTTTTTTTCAAAAGCTCATCGGAAAATTTTTCAAAAAAAAAAAAAAAAAAAAAAAAAAGGTTT  
ATTACCCTACTGCATTTTGATAATCTGAACATAATGAGCTAATGAAAGCAATTCTCATTTAAAAACAAGTA  
TTCTCTCT



TTATTGGTTTTCTAACCGCCGCGCCGCGCAGGTACCCCGCGCATCTCTTCTTCTCGAAGAAAGCGGAAAA  
AACAAAAAAAAAAGTATAAATAGTGGAGTCTTTTCCATTTAACATTTAGAAAAAATTCGAATGGAAATT  
TCTTGCCG

GTTTCTATAAGTGTAGTTGTAACCTTATGAAATATCGATTTAAATTCGAAGTGTGTTTGCAGGATATAAA  
TCAAAAAAAAAAAAAAAAAAAAAAAAAAATTAATAAATAAATAAATAAATAACAATGATATCGATAACGGTGA  
AATTCTTT

TGATCTTTTGCATATTTTTTTTTTTTTTTGGGCTATAAAGTATATATAGATACAAATATATGATGAATCATT  
AAAGAGGAGTTATTACTAAGTGAAAGAAAAAGAAAAAAGATCAAAACCAAACCTTCGTATTTCGAGC  
CTAAAAAA

TTTTCTTTTTCTGTTGGTATTCTAAAATTAACCTTGCTGTTTCTTTTTTTTTTTTTTTTTCGCGCGACTA  
CTCAGCCATCTTGCATTTTTAAAGAAAAAGATAATCATTAAATGCCTTCACGGGAATACGTATAGAACATTA  
TTAAAAGT

ATCAAAAAAAAAAAAAAAAAAAAAAAAAAATTAATAAATAAATAAATAAATAACAATGATATCGATAACGGTG  
AAATTCTTTTCATGGATTTTTGTTGCCAAGAAAAAACAATAACGTTTTCTTTATGATACATATATCTAC  
TTTTTCAA

CATGAAACTCAAAAATCATCAAAAAAGAAAAGCTAAATGTATACTTTTTTGTCTACATTAGTTACCTTTTT  
ATTACATGAGAAAGTTATTTTTCTTCTTTTTTTTTTTTTTTTTTTTTGAAACTTTTTCTCTCGGAAAATAAA  
AGATATAT

TGCTTTTGTTTTTTAAGAATGTCGGGTAATAAACAGATTGTTTTTCTGGGAGGATAATCTTTTTCTTTTT  
CCTGTTGGTATTCTAAAATTAACCTTGCTGTTTCTTTTTTTTTTTTTTTTTTTTTCGCGCGACTACTCAGCCATCT  
TGCATTTT

TTTTTTTTTTTTCGCGCGACTACTCAGCCATCTTGCATTTTTAAAGAAAAAGATAATCATTAAATGCCTTCAC  
GGGAATACGTATAGAACATTATTAAGTATATGAATGGCATATATATATAGAACACCACCCTTGAAAAAC  
ATTTATAC

ATATCTGCCTCTATACCAATCACTTTTTTCATTTTTTTTTCAAAGCTCATCGGAAAATTTTTCAAAAAAAAA  
AAAAAAAAAAAAAAAAAGGTTTATTACCCTACTGCATTTTGATAATCTGAACATAATGAGCTAATGAAAGCAA  
TTCTCATT

CACTGTCAAAGAAAGAACTAAGCAATGCAATATCTGCCTCTATACCAATCACTTTTTTCATTTTTTTTTCAA  
AAGCTCATCGGAAAATTTTTCAAAAAAAAAAAAAAAAAAAAAAAAAAAGGTTTATTACCCTACTGCATTTTGAT  
AATCTGAA

GAACTTCAAACCTTTTTATGTAATGATTTAAGTCTTGTACATGACATAATAATAAATAATTTTTAAAAATA  
TAAATATTTTTAATAGTTTTTAAATATTTTACAGTTTATTTTTTAAATTTATTTATATGTTTTTGTTTTT  
CGAAGCAG

TCCTCAGAATTGCCATAGATGAGTATTTACTGATCTTTTGCATATTTTTTTTTTTTTTTTTGGGCTATAAAGTA  
TATATAGATACAAATATATGATGAATCATTAAAGAGGAGTTATTACTAAGTGAAAGAAAAAGAAAAAA  
AAAGATCA

AGAAAGAACTAAGCAATGCAATATCTGCCTCTATACCAATCACTTTTTTCATTTTTTTTTCAAAGCTCATCG  
GAAAATTTTTCAAAAAAAAAAAAAAAAAAAAAAAAAAAGGTTTATTACCCTACTGCATTTTGATAATCTGAACA  
TAATGAGC

ACGTATGTGCACATGTGATTTGCTTTTTGTTTTTTTTAAGAATGTCGGGTAATAAACAGATTGTTTTTCTGGG  
AGGATAATCTTTTTCTTTTTCTGTTGGTATTCTAAAATTAACCTTGCTGTTTCTTTTTTTTTTTTTTTTT  
GCGCGACT

CAGGATATAAATCAAAAAAAAAAAAAAAAAAAAAAAAAAATTAATAAATAAATAAATAAATAAATAACAATGATATC  
GATAACGGTGAAATTCCTTTTCATGGATTTTTGTTGCCCAAGAAAATAACAATAACGTTTTCTTTATGATAC  
ATATATCT

GAGTATTTACTGATCTTTTGCATATTTTTTTTTTTTTTTGGGCTATAAAGTATATATAGATACAAATATATG  
ATGAATCATTAAGAGGAGGTTATTACTAAGTGAAAGAAAAGAAAAAAAAAAGATCAAAACCAAACCTC  
GTATTCGA

TGCCATAGATGAGTATTTACTGATCTTTTGCATATTTTTTTTTTTTTTTGGGCTATAAAGTATATATAGATA  
CAAATATATGATGAATCATTAAGAGGAGGTTATTACTAAGTGAAAGAAAAGAAAAAAAAAAGATCAAA  
ACCAAAC

TCATACTTCTGTTTCTATAAGTGTTAGTTGTAACCTATGAAATATCGATTTAAATTCGAAGTGTTGTTTGC  
AGGATATAAATCAAAAAAAAAAAAAAAAAAAAAAAAAAATTAATAAATAAATAAATAAATAACAATGATATCG  
ATAACGGT

TTATTTCAAGATTATTGGTTTTCTAACC GCCGCGCGCAGGTACCCCGCGCATCTCTTCTTCTCGAAGA  
AAGCGGAAAAAACAAAAAAAAAAGTATAAATAGTGGAGTCTTTTCCATTTAACATTTAGAAAAAATTCG  
AATGGAAA

TAACCTTGCTGTTTCTTTTTTTTTTTTTTTTTTTCGCGCGACTACTCAGCCATCTTGCATTTTTTAAAGAAAAAG  
ATAATCATTAAATGCCTTACGCGGAATACGTATAGAACATTATTAAAGTATATGAATGGCATATATATATA  
GAACACCA

ACACATTTCTGCTGATGTGTTTTTTTTTTTTTCAACTTATTACGCGATTCTGTTTTTTTTTTACGGTAACAGAA  
TACAGAATAAATTCACGTACAAAAATAGAGAATATATAAAATAATAGGTTGACGATTATATTGGATCTTCC  
CCTGGGGT

GTTTTTCTGGGAGGATAATCTTTTCTTTTTTCTGTTGGTATTCTAAAATTAACCTTGCTGTTTCTTTTTT  
TTTTTTTTTTCGCGCGACTACTCAGCCATCTTGCATTTTTTAAAGAAAAAGATAATCATTAAATGCCTTACG  
GGAATACG

TGTCGGGTAATAAACAGATTGTTTTTCTGGGAGGATAATCTTTTCTTTTTTCTGTTGGTATTCTAAAATT  
AACCTTGCTGTTTCTTTTTTTTTTTTTTTTTTTCGCGCGACTACTCAGCCATCTTGCATTTTTTAAAGAAAAAGA  
TAATCATT

AAGCAATGCAATATCTGCCTCTATACCAATCACTTTTTTCAATTTTTTTTTTCAAAGCTCATCGGAAAATTTTT  
CAAAAAAAAAAAAAAAAAAAAAAAAAAAGGTTTATTACCCTACTGCATTTTGATAATCTGAACATAATGAGCTA  
ATGAAAGC

TTTTTTTTCAAAGCTCATCGGAAAATTTTTCAAAAAAAAAAAAAAAAAAAAAAAAAAAGGTTTATTACCCTAC  
TGCATTTTGATAATCTGAACATAATGAGCTAATGAAAGCAATTCTCATTTAAAACAAGTATTCTCTCTTA  
TTGAAGTA

GCTGATGTGTTTTTTTTTTTTTCAACTTATTACGCGATTCTGTTTTTTTTTTACGGTAACAGAATACAGAATAA  
ATTCACGTACAAAAATAGAGAATATATAAAATAATAGGTTGACGATTATATTGGATCTTCCCCTGGGGTTC  
AAGAGTCG

CGCGCGCAAGCCAGCGGTAAAGGGAAAAGAACGGAGGACGATTACATACAAGATGAACGAATAAATAAATT  
AATAATAAATAAATAAATAAAGTACAGTAGCATTAATATTATTAAGTTAATGATTAATAAATTGGTTAAT  
TGTC AAGA

CTGAAGAGAACACTGTCAAAGAAAGAACTAAGCAATGCAATATCTGCCTCTATACCAATCACTTTTTTCA  
TTTTTTTTCAAAGCTCATCGGAAAATTTTTCAAAAAAAAAAAAAAAAAAAAAAAAAAAGGTTTATTACCCTACT  
GCATTTTG

ATAGTGGCTCATGATCTGTAAATGATCGGTTGACCGCAGTATTATATAATAACATCCGTATAAGTACATAT  
ACTACCATGTCTGTTCTCTACATTGCTTTTTATTCAAGATTATTGGTTTTCTAACCGCCGCGCCGCGCAG  
GTACCCCG

TCCGTAAAGGATGGTTTAATAATAAGAAATTTATAATATTAATAATACATATATACAAAAATTTATATTTA  
TATACATGCGCCTAACTATTCATACTATTAATTTTCATATTATTAAGCTTTTTTTTTTTTCATTTATCATTTT  
TTTTTCGTA

ACATGTGATTTGCTTTTTGTTTTTTTTAAGAATGTCGGGTAATAAACAGATTGTTTTTCTGGGAGGATAATCT  
TTTTTTTTTCTGTTGGTATTCTAAAATTAACCTTGCTGTTTCTTTTTTTTTTTTTTTTTTCGCGCGACTAC  
TCAGCCAT

TATACTTTTTTGTCTACATTAGTTACCTTTTTATTACATGAGAAAGTTATTTTTCTTCTTTTTTTTTTTTTT  
TTTTTGAAACTTTTTCTCTCGGAAAATAAAAGATATATTTACAAGTGAAAGCTTATTGTAATGTGTCATT  
TTAAACAT

TAAGGGAATAGGCCGTTATTTCCGTAAAGGATGGTTTAATAATAAGAAATTTATAATATTAATAATACATA  
TATACAAAAATTTATATTTATATACATGCGCCTAACTATTCATACTATTAATTTTCATATTATTAAGCTTTT  
TTTTTTTC

TTTTTTTTTTCAACTTATTACGCGATTTCGTTTTTTTTTTTTTACGGTAACAGAATACAGAATAAATTCACGTAC  
AAAAATAGAGAATATATAAAATAATAGGTTGACGATTATATTGGATCTTCCCCTGGGGTTCAAGAGTCGAG  
ACCGAGTC

TGATTAGTAACATGAAACTCAAAAATCATCAAAAAAGAAAAGCTAAATGTATACTTTTTTGTCTACATTA  
GTTACCTTTTATTACATGAGAAAGTTATTTTTCTTCTTTTTTTTTTTTTTTTTTTGAAACTTTTTCTCTC  
GGAAAATA

AGCCTTGCGTTTTCGAGAAAGTGAAAACCAATTGAATACAAAATAAAAAAAGAAGAAAGAAATAGCAGGT  
CTAAGATATATAAGAAAGTTAATATCATTTTTTGAACATTTTTATTTTAGACGCCTTCAGCCGCGCGACGCC  
GGAGTAAT

ATTCTAAAATTAACCTTGCTGTTTCTTTTTTTTTTTTTTTTTTTCGCGCGACTACTCAGCCATCTTGCATTTTT  
AAAGAAAAAGATAATCATTAAATGCCTTCACGGGAATACGTATAGAACATTATTAAGTATATGAATGGCA  
TATATATA

CTTTTTTTTTTTTTTTTTTTTTTGGAGATTCTTCATATTCTGTTATTAAATTTTTAGACTTTAATTTTTACTT  
TCTATGTAACGTTCACTCTTACCCTAAATATTAACCTATTTGATAAAATATTACACTGAAAGGTGTTACAA  
CTTTTCTT

TGATAAGTACTCATACTTCTGTTTCTATAAGTGTTAGTTGTAACCTTATGAAATATCGATTTAAATTCGAAG  
TGTTGTTTGCAGGATATAAATCAAAAAAAAAAAAAAAAAAAAAAAAAAATTAATAAATAAATAAATAAATAC  
AATGATAT

AGTCTTGTACACATGACATAATAATAAATAATTTTTAAAAATATAAAATATTTTTAATAGTTTTTAAATATTT  
TACAGTTTATTTTTTAAATTTATTTATATGTTTTTGTTCGGAAGCAGTCAAAGTATTTTTAATTTTCGGA  
GCTTTTCAT

GGAAAATTTTTCAAAAAAAAAAAAAAAAAAAAAAAAAAGGTTTATTACCCTACTGCATTTTGATAATCTGAAC  
ATAATGAGCTAATGAAAGCAATTCTCATTTAAAAACAAGTATTCTCTCTTATTGAAGTATGCATTATCTAT  
CATTATAA

AAAAATCATCAAAAAAGAAAAGCTAAATGTATACTTTTTTGTCTACATTAGTTACCTTTTTATTACATGAG  
AAAGTTATTTTTCTTCTTTTTTTTTTTTTTTTTTTTTTGAACCTTTTTCTCTCGGAAAATAAAAGATATATTT  
ACAAGTGA

TAATAAATAATTTTAAAAATATAAAATATTTTAAATAGTTTTTAAATATTTTACAGTTTATTTTTTAAATT  
TATTTATATGTTTTTGTTCGGAAGCAGTCAAAGTATTTTAAATTTTCGGAGCTTTCATTTCAAGCGCCTT  
TTTTTTAC

AGTGTAACATTCAAGTGATTTTAACTTTACGCGGTTGAAGAATGCTGTGTTTTCGAACTATAAAGCGTCAGA  
AAAGATGGTTTAGCGAAGGCACCATTATGAAGATAGACACATTCTTCTTTTTTTTTTTTTTTTTTTTTTTT  
TTTTTTTT

GAGGATAATCTTTTCTTTTTCTGTTGGTATTCTAAATTAACCTTGCTGTTTCTTTTTTTTTTTTTTTTTT  
CGCGGACTACTCAGCCATCTTGCATTTTTTAAAGAAAAAGATAATCATTAAATGCCTTCACGGGAATACGTA  
TAGAACAT

TGTGTCAATGCTACTATTTTGGAGATTAATCTCAGTACAAAACAATATTAAGAGAGGTGAATTATTTTTTC  
CCCCCTTATTTTTTTTTTGTAAAATTGATCCAAATGTAAATAAACAATCACAAGGAAAAAAAAAAAAAAAA  
AAAAAAT

TTTTGTATGTACACATTTCTGCTGATGTGTTTTTTTTTTTTCACTTATTACGCGATTTCGTTTTTTTTTTTAC  
GGTAACAGAATACAGAATAAATTCACGTACAAAATAGAGAATATATAAAATAATAGGTTGACGATTATAT  
TGGATCTT

TGTGACTAGAGGAAGTAAGGAGAAAAAACGATAGTAATCGTATTTTAGGTTGTGCGTTTTTATAATTTTTT  
TTTTTTTGTAAATCTATGCAAATGTAATATAAGTATATTTAAAGAAATAATGAGTCCTGTGAAAACAAAA  
GAAAAAA

AGCGAAAAGAAAAAGAAAAATAGAAAATTTGGGTGGGGGGGGCGGAAGATCCCACGCCGCGCAAGAGATA  
TTTCAATATTACTACTACATAGTATATGCGGCGCTACCATACGTACAACTTTTTTTTCTTTTTTTTTTTTT  
TTGCCTTC

AAAGCTCATCGGAAAATTTTTCAAAAAAAAAAAAAAAAAAAAAAAAAAAGGTTTATTACCCTACTGCATTTTGA  
TAATCTGAACATAATGAGCTAATGAAAGCAATTCTCATTTAAAAACAAGTATTCTCTCTTATTGAAGTATG  
CATTATCT

TTAATTGTTCTGATTAGTAACATGAAACTCAAAAATCATCAAAAAAGAAAAGCTAAATGTATACTTTTTT  
GTCTACATTAGTTACCTTTTATTACATGAGAAAGTTATTTTTCTTCTTTTTTTTTTTTTTTTTTTTTTGA  
TTTTCTC

CGGTGGAAGAAAAACAGCGAAAAAAATAACCGATACCCCTTTTTCGAATACAAATGCTTGTATATTCAAT  
TATGAATTATTTTTTTTTTTTTTTTCAATTTCTTATATTATTTTTTGTTCGAGAATCACTTTTTCAAGATGGTA  
ACAACATC

GGAGATTAATCTCAGTACAAAACAATATTAAGAGAGGTGAATTATTTTTCCCCCTTATTTTTTTTTTTGT  
TAAATTTGATCCAAATGTAAATAAACAATCACAAGGAAAAAAAAAAAAAAAAAAAAAAAAATAGCCGCCATGAC  
CCCGGATC

AAAAGAAAAATAGAAAATTTGGGTGGGGGGGGCGGAAGATCCCACGCCGCGCAAGAGATATTTCAATATT  
ACTACTACATAGTATATGCGGCGCTACCATACGTACAACTTTTTTTTCTTTTTTTTTTTTTTTTTTGCCTTCTA  
AATTTGTA

CGAACCCGTCATTGATCAAAATAGGTCTATAATATTAATATACATTTATATAATCTACGGTATTTATATCA  
TCAAAAAAAGTAGTTTTTTTTATTTTATTTTGTTCGTTAATTTTCAATTTCTATGGAAACCCGTTTCGTA  
ATTGGCGT

ATAGAGTAAGTTTTGTATGTACACATTTCTGCTGATGTGTTTTTTTTTTTTCACTTATTACGCGATTTCGTT  
TTTTTTTTACGGTAACAGAATACAGAATAAATTCACGTACAAAATAGAGAATATATAAAATAATAGGTTG  
ACGATTAT

AGCGGTCTTTTCTCAGAATTGCCATAGATGAGTATTTACTGATCTTTTGCATATTTTTTTTTTTTTTTGGG  
CTATAAAGTATATATAGATACAAATATATGATGAATCATTAAAGAGGAGGTTATTACTAAGTGAAAGAAA  
AGAAAAA

GGAAGTAAGGAGAAAAACGATAGTAATCGTATTTTAGGTTGTGCGTTTTTATAATTTTTTTTTTTTTGTA  
ATTCTATGCAAATGTAATATAAGTATATTTAAAGAAATAATGAGTCCTGTGAAAACAAAAAGAAAAAAGA  
TCATTAAT

GATCACTTTAGCTGGTCCCATTGGAAGAACCCTTTTTTTTTTTTTTTTTTTTTTTGAGATTCTTCATATTCTGT  
TATTAAATTTTTAGACTTTAATTTTTACTTTCTATGTAACGTTCACTCTTACCCTAAATATTAAACTATTT  
GATAAAAT

AACAATATTA AAAAGAGGTGAATTATTTTTCCCCCTTATTTTTTTTTTTGTTAAAATTGATCCAAATGTAA  
ATAACAATCACAAGGAAAAAAAAAAAAAAAAAAAAAAAAATAGCCGCCATGACCCCGGATCGTCGGTTGTGAT  
ACGGTCAG

TCGCGCGACTACTCAGCCATCTTGCATTTTTAAAGAAAAAGATAATCATTAAATGCCTTCACGGGAATACGT  
ATAGAACATTATTA AAAAGTATATGAATGGCATATATATATAGAACCACCCTTGAAAAACATTTATACCC  
CTTAAACT

CCTTATGTTGTTTGTCTTAGTTTTTTGATATTAGTGTGCTTATGTGAAATTTTCGCGATTTC AATTAAATA  
ATAAATACATATATAAAGAATATACACAGAGGGAAGCAAAGTAAACTAAAAGTGATACTTACACGAGCTT  
TTTTGGTT

GGCCGTTATTTCCGTAAAGGATGGTTTAATAATAAGAAATTTATAATATTAATAATACATATATACAAAA  
TTTATATTTATATACATGCGCCTAACTATTCATACTATTAATTTTCATATTATTAAGCTTTTTTTTTTTCAT  
TTATCATT

TTCGAAGAACCCTTTTTTTTTTTTTTTTTTTTTTTGAGATTCTTCATATTCTGTTATTAATTTTTAGACTTTA  
ATTTTTACTTTCTATGTAACGTTCACTCTTACCCTAAATATTAAACTATTTGATAAAATATTACACTGAAA  
GGTGTTAC

TTTGTCTTAGTTTTTTGATATTAGTGTGCTTATGTGAAATTTTCGCGATTTC AATTAAATAATAAATACAT  
ATATAAAGAATATACACAGAGGGAAGCAAAGTAAACTAAAAGTGATACTTACACGAGCTTTTTTGGTTCC  
AAACTGTT

AATAAGAAATTTATAATATTAATAATACATATATACAAAAATTTATATTTATATACATGCGCCTAACTATT  
CATACTATTAATTTTCATATTATTAAGCTTTTTTTTTTTTCATTTATCATTTTTTTTTTCGTAACCTCTCATACC  
TGTACAGG

AACATCCGTATAAGTACATATACTACCATGTCTGTTCTCTACATTGCTTTTTATTCAAGATTATTGGTTTT  
CCTAACCGCCGCGCCGCGCAGGTACCCCGCGCATCTCTTCTTCTCGAAGAAAGCGGAAAAAACAAAAAA  
AAGTATAA

TAAGTACATATACTACCATGTCTGTTCTCTACATTGCTTTTTATTCAAGATTATTGGTTTTCTAACCGCC  
GCGCCGCGCAGGTACCCCGCGCATCTCTTCTTCTCGAAGAAAGCGGAAAAAACAAAAAAAGTATAAAT  
AGTGGAGT

AGTAATTAACGCCCATTA AAAAGAAGGCATAGGAGGCATATACATATATATATATATATATATATATGGCT  
GCTGACAGATATTCTGCACTTAAAAACTAAAAATATTATACCAACTTTTCTTTTTCTTCCCGTTTCAGTTTG  
CTTGATTG

TGGGTGGGGGGGGCGGAAGATCCACGCCGCGCAAGAGATATTTCAATATTACTACTACATAGTATATGCG  
GCGCTACCATACGTACAACCTTTTTTTTTTTTTTTTTTTTTTTGCCTTCTAAATTTGTAATTCGGTCACAC  
TTTTGTGCG

CTTTTACTCGCCGAGCGAACGTGCACCAAAAAGGGAAAGGAAAAAAGAAAAAAGGAAAAAGGAAACT  
CAAACTTGGATAAATAGAAGCACTCAAATAAATTAAGTCCAAAAAATAAAAGGGAAAA  
GTTTAAAC

CATGAAGTTTGATCACTTTAGCTGGTCCCATTGGAAGAACCTTTTTTTTTTTTTTTTTTTGAGATTCTT  
CATATTCTGTTATTAAATTTTTAGACTTTAATTTTTACTTTCTATGTAACGTTCACTCTTACCCTAAATAT  
TAACTAT

CTCAGTACAAAACAATATTAATAAGAGGTGAATTATTTTTCCCCCTTATTTTTTTTTTTGTTAAAATTGAT  
CCAAATGTAAATAACAATCACAAGGAAAAAAAAAAAAAAAAAATAGCCGCCATGACCCCGGATCGT  
CGGTTGTG

AAATGCTTCACGAACACCGTCATTGATCAAATAGGTCTATAATATTAATATACATTTATATAATCTACGGT  
ATTTATATCATCAAAAAAAGTAGTTTTTTTTATTTTTATTTTGTTCGTTAATTTTCAATTTCTATGGAAAC  
CGTTCGTA

AAAAGAGGTGAATTATTTTTCCCCCTTATTTTTTTTTTTGTTAAAATTGATCCAAATGTAAATAACAATC  
ACAAGGAAAAAAAAAAAAAAAAAATAGCCGCCATGACCCCGGATCGTTCGTTGTGATACGGTCAGGG  
TAGCGCCC

TAAACAGATTGTTTTCTGGGAGGATAATCTTTTCTTTTTCTGTTGGTATTCTAAAATTAACCTTGCTG  
TTTTTTTTTTTTTTTTTTTCGCGCGACTACTCAGCCATCTTGCATTTTTAAAGAAAAAGATAATCATTAA  
TGCCTTCA

ATGGTTTAATAATAAGAAATTTATAATATTAATAATACATATATACAAAAATTTATATTTATATACATGCG  
CCTAATCTACTACTATTAATTTTCAATTTTATTAAGCTTTTTTTTTTTTCAATTTATCATTTTTTTTTCGTAAC  
CTCTCATA

TTCGAGAAAGTGAAAACCAATTGAATACAAAATAAAAAAAGAAAGAAAGAAATAGCAGGTCTAAGATATA  
TAAGAAAGTTAATATCATTTTTTGAACATTTTTATTTTAGACGCCTTCAGCCGCGCAGCCCGGAGTAATCA  
TATGCCCA

TCCTCGTTAATGATAAGTACTCATACTTCTGTTTCTATAAGTGTTAGTTGTAACCTTATGAAATATCGATTT  
AAATTCGAAGTGTTGTTTGCAGGATATAAATCAAAAAAAAAAAAAAAAAAATTAATAAATAAATA  
AAATAAAT

AGAAAAACGATAGTAATCGTATTTTAGGTTGTGCGTTTTTATAATTTTTTTTTTTTTGTAATTCTATGCA  
AATGTAATATAAGTATATTTAAAGAAATAATGAGTCTGTGAAAACAAAAAGAAAAAAGATCATTAATGT  
ATGTTAAC

TAGTTATGTACTGAAGAGAACACTGTCAAAAAGAAAGAACTAAGCAATGCAATATCTGCCTCTATACCAATC  
ACTTTTTTCATTTTTTTTTCAAAGCTCATCGGAAAATTTTTCAAAAAAAAAAAAAAAAAAAGGTTTTA  
TTACCCTA

GATTTATTTAAGCCTTGCCTTTCGAGAAAGTGAAAACCAATTGAATACAAAATAAAAAAAGAAAGAAAGA  
AATAGCAGGTCTAAGATATATAAGAAAGTTAATATCATTTTTTGAACATTTTTATTTTAGACGCCTTCAGCCG  
CGCGACGC

CTTTGACATTGAACTTCAAACCTTTTATGTAATGATTTAAGTCTTGTACATGACATAATAATAAATAAT  
TTTTAAAATATAAATATTTTTAATAGTTTTTAAATATTTTACAGTTTATTTTTTAAATTTATTTATATGT  
TTTTGTTT

AGGGCATTTTTTCTCGTTAATGATAAGTACTCATACTTCTGTTTCTATAAGTGTTAGTTGTAACCTTATGAA  
ATATCGATTTAAATTCGAAGTGTTGTTTGCAGGATATAAATCAAAAAAAAAAAAAAAAAAATTAATAA  
TAAATAAA

TGAAAACCAATTGAATACAAAATAAAAAAAAAAGAAGAAAGAAATAGCAGGTCTAAGATATATAAGAAAGTT  
AATATCATTTTTGAACATTTTTATTTTAGACGCCTTCAGCCGCGCAGCCCGGAGTAATCATATGCCCATG  
ACTTTACC

TTTTTGATATTAGTGTGGCTTATGTGAAATTTTCGCGATTTCAATTAATAATAATAACATATATAAGAA  
TATACACAGAGGGAAGCAAAAGTAAACTAAAAGTGATACTTACACGAGCTTTTTTGGTTCCAACTGTTCA  
TGATGATG

CATATTTTTTTTTTTTTTTGGGCTATAAAGTATATATAGATACAAATATATGATGAATCATTAAAGAGGAGG  
TTATTACTAAGTGAAAGAAAAAGAAAAAAAAAAGATCAAAACCAAACCTTCGTATTCGAGCCTAAAAACA  
GAATATAA

TACTACCATGTCTGTTCTCTACATTGCTTTTTTATTCAAGATTATTGGTTTTTCTAACC GCCGCGCCGCGCA  
GGTACCCCGCGCATCTCTTCTTCTCGAAGAAAGCGGAAAAAACAAAAAAAAGTATAAATAGTGGAGTCT  
TTTCCCAT

ATAGAAAATTTGGGTGGGGGGGGCGGAAGATCCCACGCCGCGCAAGAGATATTTCAATATTACTACTACAT  
AGTATATGCGGCGCTACCATACGTACAACTTTTTTTTTCTTTTTTTTTTTTTTTGCCTTCTAAATTTGTAAT  
TCGGTCAC

CAGAGGGAAGATAGAGTAAGTTTTGTATGTACACATTTCTGCTGATGTGTTTTTTTTTTTTTCAACTTATTAC  
GCGATTCGTTTTTTTTTACGGTAACAGAATACAGAATAAATTCACGTACAAAAATAGAGAATATATAAAA  
TAATAGGT

TCTGTTCTCTACATTGCTTTTTTATTCAAGATTATTGGTTTTTCTAACC GCCGCGCCGCGCAGGTACCCCGC  
GCATCTCTTCTTCTCGAAGAAAGCGGAAAAAACAAAAAAAAGTATAAATAGTGGAGTCTTTTCCCATTT  
AACATTTA

GGGCGGAAGATCCCACGCCGCGCAAGAGATATTTCAATATTACTACTACATAGTATATGCGGCGCTACCAT  
ACGTACAACTTTTTTTTTCTTTTTTTTTTTTTTTGCCTTCTAAATTTGTAATTCGGTCACACTTTTGTGCGA  
GTGTTGCA

ATTATATAATAACATCCGTATAAGTACATATACTACCATGTCTGTTCTCTACATTGCTTTTTTATTCAAGAT  
TATTGGTTTTTCTAACC GCCGCGCCGCGCAGGTACCCCGCGCATCTCTTCTTCTCGAAGAAAGCGGAAAAA  
ACAAAAAA

AGTCTTTACCAGCGGTCTTTTCTCAGAATTGCCATAGATGAGTATTTACTGATCTTTTGCATATTTTTTT  
TTTTTTTTGGGCTATAAAGTATATATAGATACAAATATATGATGAATCATTAAAGAGGAGGTTATTACTAAG  
TGAAAGAA

TATACTCAAACGGTGGAAGAAAAACAGCGAAAAAAAATAACCGATACCCCTTTTTCGAATACAAATGCTTG  
TATATTCAATTATGAATTATTTTTTTTTTTTTTTTTCATTTCTTATATTATTTTTTGTTCGAGAATCACTTTT  
CAAGATGG

ATGATCTGTAAATGATCGGTTGACCGCAGTATTATATAATAACATCCGTATAAGTACATATACTACCATGT  
CTGTTCTCTACATTGCTTTTTTATTCAAGATTATTGGTTTTTCTAACC GCCGCGCCGCGCAGGTACCCCGCG  
CATCTCTT

CTACTATTTTGGAGATTAATCTCAGTACAAAACAATATTAATAAGAGGTGAATTATTTTTTCCCCCTTATT  
TTTTTTTTGTTAAATTTGATCCAAATGTAAATAACAATCACAAGGAAAAAAAAAAAAAAAAAAAAAAAAATAG  
CCGCCATG

TCCTGTTGGTATTCTAAAATTAACCTTGCTGTTTCTTTTTTTTTTTTTTTTTTTCGCGCGACTACTCAGCCATC  
TTGCATTTTTTAAAGAAAAAGATAATCATTAAATGCCTTCACGGGAATACGTATAGAACATTATTAAGAT  
ATGAATGG

ACCACAAAGCGAGGTCGCTTTTGAAGAGCCCTCGGTAGCATAACATTTTTTAATTATTACGACTGTTTTTTT  
TATTCATTATGTAGAGATAATTAATGTTATAGATGCTCTATACTCAAACGGTGGAAGAAAAACAGCGAAA  
AAAAATAA

AGTTACCTTTTATTACATGAGAAAGTTATTTTTCTTCTTTTTTTTTTTTTTTTTTTTTTTTGAACCTTTTCTCT  
CGGAAAATAAAAGATATATTTACAAGTGAAAGCTTATTGTAATGTGTCAATTTTAAACATCAAATAACAGAC  
CTTTACAT

AAAACAGCGAAAAAAATAACCGATACCCCTTTTTCGAATACAAATGCTTGTATATTCAATTATGAATTAT  
TTTTTTTTTTTTTTCATTTCTTATATTATTTTTTGTTCGAGAATCACTTTTTCAAGATGGTAACAACATCTT  
CGTCTTCC

TTTCTCTATTTTTTTTTTTAATTGAAAAATTTCTTTCTCTATAGCGTATAGAATATATGTTACATGTATAT  
ATATATATAAAGTAAAAACGTTTCGAAAATTTCTCATTATACCCAGATCATTAAAAGACATTTTCGTTATT  
ATCAATTG

AGGTATTATTTTTTTTTTTTTTTGATAAGAAATTTAAGTGTTACAGAATGGGCCATCTTACAAAAATAATAG  
TCTTTATGTATTTTTATATATGTAAAAGAATTGAAATATTTTATAACTGGTTGTTATTATGGTACAGTGCG  
CTGCCAA

CATTGATCAAATAGGTCTATAATATTAATATACATTTATATAATCTACGGTATTTATATCATCAAAAAAAA  
GTAGTTTTTTTTATTTTTATTTTGTTCGTTAATTTTCAATTTCTATGGAAACCCGTTTCGTAATTTGGCGTTT  
GTCTCTAG

TCCCACGCCGCGCAAGAGATATTTCAATATTACTACTACATAGTATATGCGGCGCTACCATACGTACAAC  
TTTTTTTTCTTTTTTTTTTTTTTTTTTGCCTTCTAAATTTGTAATTCGGTCACACTTTTGTGCGAGTGTGCAA  
CGTCTTGA

AGTGTTAGCGATAATCAAGAAGTGAAACTCTTTCTCTATTTTTTTTTTTAATTGAAAAATTTCTTTCTCTA  
TAGCGTATAGAATATATGTTACATGTATATATATATAAAGTAAAAACGTTTCGAAAATTTCTCATTATA  
CCCAGATC

GCCCATTA AAAAGAAGGCATAGGAGGCATATACATATATATATATATATATATATATATATATATATATATATGGCTGCTGACAGAT  
ATTCTGCACTTAAAAACTAAAAATATTATACCAACTTTTCTTTTTCTTCCCGTTTCAGTTTGCTTGATTGGC  
CCAGCTCT

ATTATATTGACTTTGACATTGAACTTCAAAACCTTTTATGTAATGATTTAAGTCTTGTCACATGACATAAT  
AATAAATAATTTTTAAAAATATAAAATATTTTTAATAGTTTTTAAATATTTTACAGTTTATTTTTTAAATTT  
ATTTATAT

ATTAGCCCAACAGCTACTAAAGGTATTATTTTTTTTTTTTTTTGATAAGAAATTTAAGTGTTACAGAATGGG  
CCATCTTACAAAAATAATAGTCTTTATGTATTTTTATATATGTAAAAGAATTGAAATATTTTATAACTGGT  
TGTTATTA

TTGAATACAAAATAAAAAAAGAAGAAAGAAATAGCAGGTCTAAGATATATAAGAAAGTTAATATCATT  
TTGAACATTTTATTTTAGACGCCTTCAGCCGCGCAGCCCGGAGTAATCATATGCCCATGACTTTACCAA  
AAGGCAAC

AAAAAAGAAAAGCTAAATGTATACTTTTTTGTCTACATTAGTTACCTTTTATTACATGAGAAAGTTATTT  
TTCTTCTTTTTTTTTTTTTTTTTTTTTTGAACCTTTTCTCTCGGAAAATAAAAGATATATTTACAAGTGAA  
GCTTATTG

AAAAAATAACCGATACCCCTTTTTCGAATACAAATGCTTGTATATTCAATTATGAATTATTTTTTTTTTT  
TTTCATTTCTTATATTATTTTTTGTTCGAGAATCACTTTTTCAAGATGGTAACAACATCTTCGTCTTCCAA  
AATGTGAC



GTGCACCAAAAAGGGAAAGGAAAAAAGAAAAAAGGAAAAAGGAAACTCAAACTTGGATAAATAGAA  
GCACTCAAACTAAATTTAACTGCCAAAAAAAAAAAAAAAAATAAAAAGGGAAAAGTTTAAACATCAAAGTACAC  
CTTTCACC

GCTGGTCCCATTGGAAGAACCTTTTTTTTTTTTTTTTTTTTTTTGAGATTCTTCATATTCTGTTATTAATTT  
TTAGACTTTAATTTTTACTTTCTATGTAACGTTCACTCTTACCCTAAATATTTAACTATTTGATAAAATAT  
TACACTGA

AATGATCGGTTGACCGCAGTATTATATAATAACATCCGTATAAGTACATATACTACCATGTCTGTTCTCTA  
CATTGCTTTTTATTCAAGATTATTGGTTTTCTAACCGCCGCGCCGCGCAGGTACCCCGCGCATCTCTTCT  
TCTCGAAG

CGTATTCATAAAATGCTTACGAACACCGTCATTGATCAAATAGGTCTATAATATTAATATAACATTTATAT  
AATCTACGGTATTTATATCATCAAAAAAAGTAGTTTTTTTTATTTTATTTTGTTCGTTAATTTTCAATTC  
TATGGAAA

TTTTTCTGGGACTGGAATACCAAGCACTACAACGACACTTTATTTAAACAGTAAATAGATAATATGATTAT  
GTAATTTTAGAAAATAATTATGAATACCGATTTATTTTTTTTTTTTTTTTTTTCACTTTTGCTGGCAAGAAAT  
ACGAAATT

GAAGGTGTCGTTAATTGTTCTGATTAGTAACATGAAACTCAAAATCATCAAAAAAGAAAAGCTAAATGT  
ATACTTTTTTGTCTACATTAGTTACCTTTTATTACATGAGAAAGTTATTTTTCTTCTTTTTTTTTTTTTTT  
TTTTGAAA

TTTTTTTTTTTTGATAAGAAATTTAAGTGTTACAGAATGGGCCATCTTACAAAAATAATAGTCTTTATGTA  
TTTTTATATATGTAAGAATTTGAAATATTTTATAACTGGTTGTTATTATGGTACAGTGCCTGCCCAATC  
CACGTGGA

CATGACATAATAATAAATAATTTTAAAAATATAAAATATTTTAAATAGTTTTTAAATATTTTACAGTTTAT  
TTTTTAAATTTATTTATATGTTTTTGTTCGGAAGCAGTCAAAGTATTTTAAATTTTCGGAGCTTTCATTT  
CAAGCGCC

GGATGAAAAAAATGTATAATGTGACTAGAGGAAGTAAGGAGAAAAAACGATAGTAATCGTATTTTAGGTT  
GTGCGTTTTTATAATTTTTTTTTTTTTTTGTAATTCTATGCAAATGTAATATAAGTATATTTAAAGAAATAAT  
GAGTCCTG

CAACATCCTGCATGAAGTTTGATCACTTTAGCTGGTCCCATTGGAAGAACCTTTTTTTTTTTTTTTTTTTT  
TGAGATTCTTCATATTCTGTTATTTAAATTTTTTAGACTTTAATTTTTACTTTCTATGTAACGTTCACTCTTA  
CCCTAAAT

AAAAAAGAAAAAAGGAAAAAGGAAACTCAAACTTGGATAAATAGAAGCACTCAAACTAAATTAAC  
TGCAAAAAAAAAAAAAAAAAATAAAAAGGGAAAAGTTTAAACATCAAAGTACACCTTTCACCCCTCCACACACC  
ATGGAACA

GTAGAGGAAGAGACTGTCATAGGGAAGAGCCCTTTCTACATACTACTACATAATATATATATATAGTATAG  
AAATTGGTATATCACTACTTGTACAAATATCATATTGTACGATAATCGCGAAGAACGACGCACTGGTGGGA  
AGAAGTGG

CGTCTGTGAAGGATGAAAAAATGTATAATGTGACTAGAGGAAGTAAGGAGAAAAAACGATAGTAATCGT  
ATTTTAGGTTGTGCGTTTTTATAATTTTTTTTTTTTTTTGTAATTCTATGCAAATGTAATATAAGTATATTTA  
AAGAAATA

TCAAAAAAAAAAAAAAAAAAAGGTTTATTACCCTACTGCATTTTGGATAATCTGAACATAATGAGCT  
AATGAAAGCAATTTCTCATTTAAAAACAAGTATTCTCTCTTATTGAAGTATGCATTATCTATCATTATAAAT  
TCTTTTAT

AAATGTATAATGTGACTAGAGGAAGTAAGGAGAAAAACGATAGTAATCGTATTTTAGGTTGTGCGTTTTT  
ATAATTTTTTTTTTTTTTTGTAATTCATGCAAATGTAATATAAGTATATTTAAAGAAATAATGAGTCCTGTG  
AAAACAAA

ACTTTCAAAAAAGAAAAAGTAAAGTATGATAAACGGAGCACTTGCCAAAGTAATTAACGCCCATTA  
AGAAGGCATAGGAGGCATATACATATATATATATATATATATATGGCTGCTGACAGATATTCTGCACTT  
AAAAACTA

CTATAACTTTCCTTATGTTGTTTTCCTTAGTTTTTTGATATTAGTGTGCTTATGTGAAATTTTCGCGATTT  
AATTTAAATAATAAATACATATATAAAGAATATACACAGAGGGAAGCAAAGTAAACTAAAAGTGATACTT  
ACACGAGC

TGGAAATCATCGCGCGCAAGCCAGCGGTAAAGGGAAAAGAACGGAGGACGATTACATACAAGATGAACGAA  
TAAATAAATTAATAATAAATAATAAATAAAGTACAGTAGCATTAAATATTATTAAGTTTAAATGATTA  
ATTGGTTA

ATAGATGCTCTATACTCAAACGGTGAAGAAAAACAGCGAAAAATAACCGATACCCCCTTTTCGAATA  
CAAATGCTTGTATATTCAATTATGAATTATTTTTTTTTTTTTTTTTCATTTCTTATATTATTTTTTGTTCGAGA  
ATCACTTT

TGGATTACCTCTTTTTACTCGCCGAGCGAACGTGCACCAAAAAGGGAAAGGAAAAAAGAAAAAAGGAA  
AAAGGAACTCAAACTTGATAAATAGAAGCACTCAAATAAATAACTGCCAAAAAATAA  
AAAGGGAA

AGACTGTCATAGGGAAGAGCCCTTTCTACATACTACTACATAATATATATATATATAGTATAGAAATTGGTAT  
ATCACTACTTGTACAAATATCATATTGTACGATAATCGCGAAGAACGACGCACTGGTGGGAAGAAGTGAA  
AACAGAAG

CACTTGCCAAAGTAATTAACGCCCATTAATAAAGAACGATAGGAGGCATATACATATATATATATATATAT  
ATATATGGCTGCTGACAGATATTCTGCACTTAAAACTAAAAATATTATACCACTTTTCTTTTCTTCCC  
GTTTCAGTT

AAAAAAAAAAAAAAAAAATAGCCGCCATGACCCCGGATCGTCGGTTGTGATACGGTCAGGGTAGCGCCCT  
GGTCAAATTCAGAACTAAAAAATAATAAGGAAGAAAAAATAGCTAATTTTTCCGGCAGAAAGATTTTC  
GCTACCCG

TGTCTACATTAGTTACCTTTTATTACATGAGAAAGTATTTTTTCTTCTTTTTTTTTTTTTTTTTTTTGAAC  
TTTTTCTCTCGGAAAATAAAGATATATTTACAAGTGAAAGCTTATTGTAATGTGTCATTTTAAACATCA  
AATAACAG

AGTGAAACTCTTTCTCTATTTTTTTTTTTAATTGAAAAATTTCTTTCTCTATAGCGTATAGAATATATGTT  
ACATGTATATATATATAAAGTAAAAACGTTTCGGAAAATTCCTCATTATACCCAGATCATTAAGACAT  
TTTCGTTA

ATAATCAAGAAGTGAAACTCTTTCTCTATTTTTTTTTTTAATTGAAAAATTTCTTTCTCTATAGCGTATAG  
AATATATGTTACATGTATATATATATAAAGTAAAAACGTTTCGGAAAATTCCTCATTATACCCAGATCAT  
TAAAGAC

TATTACATGAGAAAGTATTTTTTCTTCTTTTTTTTTTTTTTTTTTTGAAACTTTTTCTCTCGGAAAATAA  
AAGATATATTTACAAGTGAAAGCTTATTGTAATGTGTCATTTTAAACATCAAATAACAGACCTTTACATCA  
AATAAGCA

CACGAGCTACAACAAAATACTAAGGGAATAGGCCGTTATTTCCGTAAAGGATGGTTTAAATAATAAGAAAT  
TATAATATTAATAATACATATATACAAAATTTATATTTATATACATGCGCCTAACTATTCACTATTAA  
TTTCATAT

TCATCGTCATATGCTATACCTTCAAGCATCTAGTATCGCATAAATAAAAAATAGTATTTGTATATCAAAAA  
ATGATCCTGTGATTTTTTTCATATGTAACGTATAAATGTAAAAATGTGCTTCTTCTGGTATTTTTAATCAAG  
TGGAAAGA

AAAGATTTTTTTTTTTAATTTTTTTTTTTTTAATTTTTTTTTTTTTTCATAGACTTTTATTTAAATAAATCAC  
GTCTATATATGTATCAGTATATAACGTAAAAAAAAAACACCGTCAGTTAAACAAAACATAAATAAAAAA  
AAAAGAAG

AGCGCAATCATTGAATAGTCAAAGATTTTTTTTTTTTTAATTTTTTTTTTTTTAATTTTTTTTTTTTTTCATAGA  
CTTTTATTTAAATAAATCACGTCTATATATGTATCAGTATATAACGTAAAAAAAAAACACCGTCAGTTAA  
ACAAAACA

AACGAAAAAAAAAAAAAAAAACACAGAAAAGAATGCAGAAAGATGTCAACTGAAAAAAAAAAGGTGAACA  
CAGGAAAAAAAAATAAAAAAAAAAAAAAAAAAAGGAGGACGAAACAAAAAAGTGAAAAAATGAAAATTTT  
TTTGAAA

CAATAGGGCGAAAAAACAGGCAACGAACGAACAATGGAAAAACGAAAAAAAAAAAAAAAAACACAGAAAAG  
AATGCAGAAAGATGTCAACTGAAAAAAAAAAGGTGAACACAGGAAAAAAAAATAAAAAAAAAAAAAAAAAA  
AGGAGGAC

TTGAATAGTCAAAGATTTTTTTTTTTTTAATTTTTTTTTTTTTAATTTTTTTTTTTTTTCATAGACTTTTATTTA  
AATAAATCACGTCTATATATGTATCAGTATATAACGTAAAAAAAAAACACCGTCAGTTAAACAAAACATA  
AATAAAAA

AATACGCTTAAGCGCAATCATTGAATAGTCAAAGATTTTTTTTTTTTTAATTTTTTTTTTTTTAATTTTTTTT  
TTTTCATAGACTTTTATTTAAATAAATCACGTCTATATATGTATCAGTATATAACGTAAAAAAAAAACAC  
CGTCAGTT

ACAATGGAAAAACGAAAAAAAAAAAAAAAAACACAGAAAAGAATGCAGAAAGATGTCAACTGAAAAAAAA  
AAGGTGAACACAGGAAAAAAAAATAAAAAAAAAAAAAAAAAAAGGAGGACGAAACAAAAAAGTGAAAAAAA  
TGAAAATT

AAAAAAAAAACACAGAAAAGAATGCAGAAAGATGTCAACTGAAAAAAAAAAGGTGAACACAGGAAAAAA  
AATAAAAAAAAAAAAAAAAAAAGGAGGACGAAACAAAAAAGTGAAAAAATGAAAATTTTTTTTGAAAAAC  
CAAGAAAT

CAACGAACGAACAATGGAAAAACGAAAAAAAAAAAAAAAAACACAGAAAAGAATGCAGAAAGATGTCAACT  
GAAAAAAAAAAGGTGAACACAGGAAAAAAAAATAAAAAAAAAAAAAAAAAAAGGAGGACGAAACAAAAAAG  
TGAAAAAA

AATGTTAACGAATACGCTTAAGCGCAATCATTGAATAGTCAAAGATTTTTTTTTTTTTAATTTTTTTTTTTT  
AATTTTTTTTTTTTTTCATAGACTTTTATTTAAATAAATCACGTCTATATATGTATCAGTATATAACGTAAA  
AAAAAAC

TTTTTTTTAATTTTTTTTTTTTTAATTTTTTTTTTTTTTCATAGACTTTTATTTAAATAAATCACGTCTATATAT  
GTATCAGTATATAACGTAAAAAAAAAACACCGTCAGTTAAACAAAACATAAATAAAAAAAAAAAGAAGTG  
TTCAAATC

GGCTCGAGAACAATAGGGCGAAAAAACAGGCAACGAACGAACAATGGAAAAACGAAAAAAAAAAAAAAAA  
CACAGAAAAGAATGCAGAAAGATGTCAACTGAAAAAAAAAAGGTGAACACAGGAAAAAAAAATAAAAAAA  
AAAAAAA

AAAAAACAGGCAACGAACGAACAATGGAAAAACGAAAAAAAAAAAAAAAAACACAGAAAAGAATGCAGAAA  
GATGTCAACTGAAAAAAAAAAGGTGAACACAGGAAAAAAAAATAAAAAAAAAAAAAAAAAAAGGAGGACGA  
AACAAAAA

ACTTTTTTTTTATATTGAATCTAATATATTATCAAACGGAACTTCGGCTGAATTTTCATACGTATATTGATT  
AAAGTGGAAAGGCATCGGAAAAGTAAGAAAAGCTTAAAAAAATTGAAAAAAAAAAAAAAAAAAAAATAAAAA  
ATAAAAAA

ATATTGAATCTAATATATTATCAAACGGAACTTCGGCTGAATTTTCATACGTATATTGATTAAAGTGGAAA  
GGGCATCGGAAAAGTAAGAAAAGCTTAAAAAAATTGAAAAAAAAAAAAAAAAAAAAATAAAAAATAAAAAATA  
AAAAAACC

GTATATCGTTAATGTTAACGAATACGCTTAAGCGCAATCATTGAATAGTCAAAGATTTTTTTTTTTTTAATT  
TTTTTTTTTTAATTTTTTTTTTTTTCATAGACTTTTTATTTAAATAAATCACGTCTATATATGTATCAGTATA  
TAACGTAA

TTTTTTTTTTTTAATTTTTTTTTTTTTCATAGACTTTTTATTTAAATAAATCACGTCTATATATGTATCAGTAT  
ATAACGTAAAAAAAAAACACCGTCAGTTAAACAAAACATAAATAAAAAAAAAAAGAAGTGTTCAAATCAA  
AGTGTCAA

ACACAGAAAAGAATGCAGAAAGATGTCAACTGAAAAAAAAAAGGTGAACACAGGAAAAAAAAATAAAAAA  
AAAAAAAAAAGGAGGACGAAACAAAAAAGTAAAAAAAAATGAAAATTTTTTTGGAAAACCAAGAAATGA  
ATTATATT

AAAATTTTTTAGGCTCGAGAACAATAGGGCGAAAAAACAGGCAACGAACGAACAATGGAAAAACGAAAAAA  
AAAAAAAAAACACAGAAAAGAATGCAGAAAGATGTCAACTGAAAAAAAAAAGGTGAACACAGGAAAAAA  
ATAAAAAA

TAATATATTATCAAACGGAACTTCGGCTGAATTTTCATACGTATATTGATTAAAGTGGAAAGGCATCGGA  
AAAGTAAGAAAAGCTTAAAAAAATTGAAAAAAAAAAAAAAAAAAAAATAAAAAATAAAAAATAAAAAACCTA  
TACAATAC

AATCATATAAACTTTTTTTTTATATTGAATCTAATATATTATCAAACGGAACTTCGGCTGAATTTTCATACG  
TATATTGATTAAAGTGGAAAGGCATCGGAAAAGTAAGAAAAGCTTAAAAAAATTGAAAAAAAAAAAAAAAA  
AAAATAAA

GCCATTGCCTTTGTTTACGAGTATATCGTTAATGTTAACGAATACGCTTAAGCGCAATCATTGAATAGTCA  
AAGATTTTTTTTTTTTTAATTTTTTTTTTTTTAATTTTTTTTTTTTTCATAGACTTTTTATTTAAATAAATCACG  
TCTATATA

TCAAACGGAACTTCGGCTGAATTTTCATACGTATATTGATTAAAGTGGAAAGGCATCGGAAAAGTAAGAA  
AAGCTTAAAAAAATTGAAAAAAAAAAAAAAAAAAAAATAAAAAATAAAAAATAAAAAACCTATACAATACAT  
ACATATGT

GTTGACGTGAAAATACATCCGCGCAAATTTTACAGGCTATTTTGGCAGCGCAATCAAAGAATAAACTTG  
GTATAGTAAGGAAGCCAGTTACTGTACGCATGAATTACGGTAGCTTTTTTTTTATTTTATTTTTTTTTTT  
TTTTGGAC

GTACATTTTTATTTTTCCCATTAAGTAAAATTTCTTCAAATTATTCTCGAAGCTTTTCATGCCATTGGTGA  
CACGAAAAAAAAATCTTGTTGTATTTTATCTAACGCGTCGCGACGCGTTAGATAAATAAACAGTAAATGA  
TGGTATAA

TTTTACTTCTCTGCATTTTTTTTCGCGTCGCGTCGCAAATTTGTGATGGTTAAAAGAAAAATGAAAAATATT  
TTTCGCGTCGTTATCACCCGGAGGAATAAAAAAAGAAACATACACATCACGTGACCACAAGAATGTTAGA  
AAGGCTTA

GCTTAGTGACGCGTTTTTCGCGCGTCAGTTTCAAGTTTTTCTTGGCTTTTTTTTTTTTCATTTTCGTAAAGGG  
TCTTAAAAGGATTAAAAAATGCAGTATTGAAATAAAGAACAATTACGAACGGTGAAGCTGCTATTTTTGGTT  
ATTATACC

TTTTCTTATGCTTAGTGACGCGTTTTTCGCGCGTCAGTTTCAAGTTTTCTTGGCTTTTTTTTTTTTCATTT  
TCGTAAAGGGTCTTAAAAGGATTAAAAAATGCAGTATTGAAATAAAGAACAATTACGAACGGTGAAGCTGC  
TATTTTGG

AAAGAGTAATCTCGATAAGGGTACATTTTTATTTTTCCCATTAAGTGAAATTTCTTCAAATTATTCTCGA  
AGCTTTCATGCCATTGGTGACACGAAAAAAAATCTTGTTGTATTTTATCTAACGCGTCGCGACGCGTTAG  
ATAAATAT

CTTTTTTTTTTACAGTTCCTTGCATCCCTCATTTTTTACATTCCTTTTTTTATAGAAAAGCATATCACT  
ATATAAAAATTCTATTATAGTTGTAACAGCATAGCATATTATAGACTTTTTTTTTTCTGGAAACGGTTAAAC  
CGTTTGGC

ATGTCCCAGGTCATTTATCTGCCATTGCCTTTGTTTACGAGTATATCGTTAATGTTAACGAATACGCTTAA  
GCGCAATCATTGAATAGTCAAAGATTTTTTTTTTTTTTAATTTTTTTTTTTTTTAATTTTTTTTTTTCATAGAC  
TTTTATTT

AAAATACATCCGCGCAAATTTTACAGGCTATTTTTGGCAGCGCAATCAAAGAATAAACTTGGTATAGTAAG  
GAAGCCAGTTACTGTACGCATGAATTACGGTAGCTTTTTTTATTTTATTTATTTTTTTTTTTTTTTGGACAA  
ATAGAAAA

TCCAGCATTCTTTTACTTCTCTGCATTTTTTTTCGCGTCGCGTCGCAAATTGTGATGGTTAAAAGAAAAATG  
AAAAAATATTTTTTCGCGTCGTTATCACCCGGAGGAATAAAAAAAGAAACATACACATCACGTGACCACAA  
GAATGTTA

AGATGTCAACTGAAAAAAAAAAGGTGAACACAGGAAAAAAAAATAAAAAAAAAAAAAAAAAAAGGAGGACG  
AAACAAAAAAGTAAAAAAAAATGAAAATTTTTTTGGAAAACCAAGAAATGAATTATATTTCCGTGTGAGAC  
GACATCGT

TTGTTTACGAGTATATCGTTAATGTTAACGAATACGCTTAAGCGCAATCATTGAATAGTCAAAGATTTTTT  
TTTTTTAATTTTTTTTTTTTTTAATTTTTTTTTTTTTTTCATAGACTTTTTATTTAAATAAATCACGTCTATATAG  
TATCAGTA

TGTTAAAAATGGTGACTGTATCTACGTATCTATAAAAAAAGGTTAACTACCGGAAATCATTTCCTCTCGT  
AAAGTGTATATTTAGGTTTCGGAATCATAAACATTGTTTTTTTTGTGTTTTTTATTTTTAAATAAAAAGAAT  
AAATATTT

AATGGCACTGTATTGATGCATTTTCTTATGCTTAGTGACGCGTTTTTCGCGCGTCAGTTTCAAGTTTTTCT  
TGGCTTTTTTTTTTTTCATTTTCGTAAAGGGTCTTAAAAGGATTAAAAAATGCAGTATTGAAATAAAGAACA  
ATTACGAA

AAAATTCATGATCGACCGCGCAAAATAAATAGATTTGCAAATAAGTTTTGTATGTACATTTATTAATATAT  
ATAATATATCAAAGAAAAAATCAAAAAAAAAAAAAAAAAAAAAAATTGCACTCTTATTCAGTCATCAATTA  
CAAAACCT

CAGAAAATGATGACAGTCTAGCTCCTATAGACGAAAAGAAGGTCCCAATGCTAAAGGACACCAAGAATAAA  
ATCGAAAATGAGCATGTAATATGGGAAAAAGTGTACGAATCAAAGACAAAATAATATAGTTGCAATAATAG  
TAATAATA

ACTTCGGCTGAATTTTACATACGTATATTGATTAAGTGGAAAGGGCATCGGAAAAGTAAGAAAAGCTTAAAA  
AAATTGAAAAAAAAAAAAAAAAAAAAAATAAAAAATAAAAAATAAAAAACCTATACAATACATACATATGTAT  
ATGAATAT

TAATGGCACCGTTGACGTCGAAAATACATCCGCGCAAATTTTACAGGCTATTTTTGGCAGCGCAATCAAAG  
AATAAACTTGGTATAGTAAGGAAGCCAGTTACTGTACGCATGAATTACGGTAGCTTTTTTTATTTTATTTA  
TTTTTTTT

ACTGTGTTGTTGATTTCTTATCCAGCATTCTTTTACTTCTCTGCATTTTTTTTCGCGTCGCGTCGCAAATTG  
TGATGGTTAAAAGAAAAATGAAAAAATATTTTTTCGCGTCGTTATCACCCGGAGGAATAAAAAAAGAAACA  
TACACATC

TCATTTATCTGCCATTGCCTTTGTTTACGAGTATATCGTTAATGTTAACGAATACGCTTAAGCGCAATCAT  
TGAATAGTCAAAGATTTTTTTTTTTTTAATTTTTTTTTTTTTAATTTTTTTTTTTTCATAGACTTTTATTTAA  
ATAAATCA

CCAATGTTCAACTGTGTTGTTGATTTCTTATCCAGCATTCTTTTACTTCTCTGCATTTTTTTTCGCGTCGCG  
TCGCAAATTGTGATGGTTAAAAGAAAAATGAAAAAATATTTTTTCGCGTCGTTATCACCCGGAGGAATAAAA  
AAAAGAAA

TATAAAAAAAGGTTAACTACCGGAAAATCATTCTTCTCGTAAAGTGTATATTTAGGTTTCGGAAATCATAA  
ACATTGTTTTTTTTGTGTTTTTTATTTTTTAAATAAAAAAGAATAAATATTTTATATTAAAAAATAAATTTTAA  
AGTAAATT

GCCATTGGTGACACGAAAAAAAATCTTGTGTTGATTTTTATCTAACGCGTCGCGACGCGTTAGATAAATATA  
ACAGTAAATGATGGTATAAATGCCACCGTCGATATTTAAATGAGATTGCTTATATATCGCATTATTACCTG  
CGAAAATC

GAATGCAGAAAGATGTCAACTGAAAAAAAAGGTGAACACAGGAAAAAAAATAAAAAAAA  
AAGGAGGACGAAACAAAAAAGTAAAAAAAATGAAAATTTTTTTGGAAAACCAAGAAATGAATTATATTTTC  
CGTGTGAG

TGAATAAATACAGCACTTTCTCGCATCTACCTCAACTGAAAAAAAATAAAAAACGCCCTTT  
AAGACGAAGTGACAAAGAGGCAATAGTTCAAAGAAAAAAAATAAAGACTGTTGATAGTTGAATT  
TTTATAAA

CGCGCAAATTTTGACAGGCTATTTTGGCAGCGCAATCAAAGAATAAACTTGGTATAGTAAGGAAGCCAGTT  
ACTGTACGCATGAATTACGGTAGCTTTTTTTATTTTATTTTATTTTTTTTTTTTTTTGGACAAATAGAAAAAT  
TTTTATTA

AGCATCCACAACAACTAACTGGTATTTTTGTTATACACAACGCGTCTTGGTTAGGCATCTGTTTTGTTTTA  
GCTATTGTTTCATCGGTTTTTTTTTTTTCTTATCTCTTTTACCGAGGGCGAAAATAGCGATAGATCGAGAA  
TATAAATA

ATATACTAGTGAGACCTTTTCCCCGTTCCCAAAAAGAAAAAAAATAAAAAAGAAAACGAGCCTTCA  
TCACGTGCATTAAGAAATAGTAATCCCAACGCACTCATCCGCTATATACATAGCGAAAACTATATGCC  
ACTTCACA

CAATTCGCGAAAATGAGCGAAAATTTTTCAAGCCCACCGCTAAAAAAAATAAAAAAGAAAAAGGGAC  
ATAAATACGTATATCTCCAGAAAATGCCAGTGGAGTGGATGAATACCTGATGGGCTATATTACTACATTA  
TTGAAAAC

GCTCCTATAGACGAAAAGAAGGTCCCAATGCTAAAGGACACCAAGAATAAAATCGAAAATGAGCATGTAAT  
ATGGGAAAAAGTGTACGAATCAAAGACAAAATAATATAGTTGCAATAATAGTAATAATAATAATAATA  
ATAATAAT

ACAACTAACTGGTATTTTTGTTATACACAACGCGTCTTGGTTAGGCATCTGTTTTGTTTTAGCTATTGTTT  
ATCGCGTTTTTTTTTTTTCTTATCTCTTTTACCGAGGGCGAAAATAGCGATAGATCGAGAATATAAATAAA  
TAAAATAT

TATGTACATTTATTAATATATATAATATATCAAAAGAAAAAATCAAAAAATAAAAAAATTGCA  
CTCTTATTCAGTCATCAATTACAAAACCTAGAGATAGCGATGGTGCATATTCATAAAAACTCCTTATAC  
TGTCGAGA

GCGTTTTTCGCGCGTCAGTTTTCAAGTTTTTCTTGGCTTTTTTTTTTTTCATTTTCGTAAAGGGTCTTAAAAGG  
ATTAATAAATGCAGTATTGAAATAAAGAACAATTACGAACGGTGAAGCTGCTATTTTGGTTATTATACCT  
TCCAGGAC

AGATATAATTTTTAAAAAATTAGAAAAAGCAAATATAATTCAGGTCCCCTTGGAAATAATGGCACTGT  
ATTGATGCATTTTCTTATGCTTAGTGACGCGTTTTTCGCGCGTCAGTTTTCAAGTTTTTCTTGGCTTTTTTT  
TTTTTATT

CAAGTCTTTAAGAGCTACATTAATTTGAAATTGTGCGAGTGTGCGCAACAACAATTCGCGAAAATGAGCGAA  
AATTTTTCAAGCCACCGCTAAAAAAGAAAAAAGAAAAAAGGGACATAAATACGTATATCTCCAGA  
AAATGCC

CAGCACTTTCTCGCATCTACCTCAACTGAAAAAAAAAAAAAAAAAATAAAAAACGCCCTTTAAGACGAAGT  
GACAAAGAGGCAATAGTTCAAAAGAAAAAAAAAAAAAAAAATATAAAGACTGTTGATAGTTGAATTTTTATAACG  
TTATGTTA

ATTTTTCCCATTAAGTGAATTTCTTCAAATTATTCTCGAAGCTTTTCATGCCATTGGTGACACGAAAAA  
AAATCTTGTGTATTTTATCTAACGCGTTCGCGACGCGTTAGATAAATATAACAGTAAATGATGGTATAAAT  
GCCACCGT

ATCGCGCGTCTCAATATTTGAGTTTTTCAAATAGTGAGGTGTGGATGTATAGAGGAATTACACACTTTTA  
AGTATGTGATGTATGGGCGCACAGTACCAATTTAACTTTTTTTTTTTTTTTTCATTTTTTAGCTTGATTTTCAA  
AAACTTA

CTCTTTACTGAGGTGGCCCTTGAATAAATACAGCACTTTCTCGCATCTACCTCAACTGAAAAAAAAAAAA  
AAAATAAAAAACGCCCTTTAAGACGAAGTGACAAAGAGGCAATAGTTCAAAAGAAAAAAAAAAAAAAAAATAA  
AGACTGTT

AATTTTCATACGTATATTGATTAAGTGGAAAGGGCATCGGAAAAGTAAGAAAAGCTTAAAAAATTGAAAA  
AAAAAAAAAAAAAAAAATAAAAAATAAAAAATAAAAAACCTATACAATACATACATATGTATATGAATATAA  
ACCTGGAA

TCTACGTATCTATAAAAAAGGTTAACTACCGGAAAATCATTTCTTCTCGTAAAGTGTATATTTAGGTTTCG  
GAAATCATAACATTGTTTTTTTGTGTTTTTTATTTTTAAATAAAAAGAATAAATATTTTATATTAAAAA  
TAAATTTT

TCTTTCTTTTATATACTAGTGAGACCTTTTCCCCGTTCCCAAAAAGAAAAAAAAAAAAAAAAAAGAAAA  
CGAGCCTTCATCACGTGCATTAAGAAATAGTAATCCCAACGCACTCATCCGCTATATACATAGCGAAAAA  
CTATATGC

ATCGACCGCGCAAAATAAATAGATTTGCAAATAAGTTTTGTATGTACATTTATTAATATATATAATATATC  
AAAAGAAAAAATCAAAAAAAAAAAAAAAAAAATTGCACTCTTATTTCAGTCATCAATTACAAAACCTAG  
AGATAGCG

TCGCCAACAACAATTCGCGAAAATGAGCGAAAATTTTTCAAGCCACCGCTAAAAAAGAAAAAAGAA  
AAAAAGGGACATAAATACGTATATCTCCAGAAAATGCCAGTGGAGTGGATGAATACCTGATGGGCTATAT  
TACTACAT

TATTGACATAATCTACGATGTGAGAGCTGTATGATATTGTGGAACCTTTGTATATATTGAAAAATTTTCCA  
GTGGAATTTTACTCGCGATGACTCAAGAGCGTGAAAAAAAAAAAAAAAAAATTAATTGCTAAAAAATC  
AAATATAT

ATTCAGGTCCCCTTGGAAATAATGGCACTGTATTGATGCATTTTCTTATGCTTAGTGACGCGTTTTTCGCG  
CGTCAGTTTTCAAGTTTTTCTTGGCTTTTTTTTTTTTCATTTTCGTAAAGGGTCTTAAAAGGATTAAAAAATG  
CAGTATTG

GGAAC TTTGTATATATTGAAAAA TTTTCCAGTGGAA TTTTACTCGCGATGACTCAAGAGCGTGAAAAAA  
AAAAA AAAAAAATTAATTGCTAAAAAATCAAATATATGCTTCCAATCGGATTTGAACCGATGATCTCCA  
CATTACTA

CATAAAATGCTCCCATCTCAAAAGTAGGGCAAAATTCATGATCGACCGCGCAAAATAAATAGATTTGCAAA  
TAAGTTTTGTATGTACATTTATTAATATATATAATATATCAAAAAGAAAAAATCAAAAAAAAAAAAAAA  
AAAATTGC

CTGCATTTTTTTTCGCGTCGCGTCGCAAATTTGTGATGGTTAAAAGAAAAATGAAAAAATATTTTTTCGCGTCG  
TTATCACCCGGAGGAATAAAAAAAGAAACATACACATCACGTGACCACAAGAATGTTAGAAAGGCTTACC  
AGTACTAG

AGGAAAGGAAAAA TTTT TAGGCTCGAGAACAATAGGGCGAAAAAACAGGCAACGAACGAACAATGGAAAA  
ACGAAAAAAAAAAAAAAAAACACAGAAAAGAATGCAGAAAGATGTCAACTGAAAAAAAAAAGGTGAACAC  
AGGAAAAA

GCTTCAAAC TTTTGT CATTGTCTTCCATCCTTCCCTTATTCTCAATATATATGTAATACGTCGTATTTG  
ATATATATATATATATATAATATAATTTAACGGTTGTTATCTGCTACATCTGTAAAATAAAAAATAAA  
AATGCTTG

AAATAGAATAAGCATCCACAACAAC TAACTGGTATTTTTGTTATACACAACGCGTCTTGGTTAGGCATCTG  
TTTTGTTTTAGCTATTGTTTCATCGCGTTTTTTTTTTTTCTTATCTCTTTTACCGAGGGCGAAAATAGCGAT  
AGATCGAG

TAATTTTTTTTTTTTTCATAGACTTTTTATTTAAATAAATCACGTCTATATATGTATCAGTATATAACGTAAA  
AAAAAACACCGTCAGTTAAACAAAACATAAATAAAAAAAGAAAGTGTTCAAATCAAAGTGTCAAAT  
CAAATTT

ACTGAGGGTAAAAGAGTAATCTCGATAAGGGTACATTTTTATTTTTCCCATTAAGTGAAATTTCTTTCAA  
TTATTCTCGAAGCTTTCATGCCATTGGTGACACGAAAAAATCTTGTTGTATTTTTATCTAACGCGTCGC  
GACGCGTT

CAAAAAGAAAAA AAAAAA AAAAAAAGAAACGAGCCTTCATCACGTGCATTAAAGAAATAGTAATCCCAA  
CGCACTCATCCGCTATATACATAGCGAAAAACTATATGCCCACTTCACAAATACGAGTTTGCATGTATAAT  
ATATAAGA

TGATTTCTTATCCAGCATTCTTTTACTTCTCTGCATTTTTTTTCGCGTCGCGTCGCAAATTTGTGATGGTTAA  
AAGAAAAATGAAAAAATTTTTTCGCGTCGTTATCACCCGGAGGAATAAAAAAAGAAACATACACATCAC  
GTGACCAC

TCGCATCTACCTCAACTGAAAAA AAAAAA AAAAAAATAAAAAACGCCCTTTAAGACGAAGTGACAAAGAGG  
CAATAGTTCAAAGAAAAA AAAAAA AAAAAAATAAAGACTGTTGATAGTTGAATTTTTATAAACGTTATGTTAAG  
TATATGTA

TTTTTTTTTTCTTTTTTTTTTACAGTTCCACTTGCATCCCTCATTTTTTCACATTCCTTTTTTTATAGAAAA  
GCATATCACTATATAAAAATTCTATTATAGTTGTAACAGCATAGCATATTATAGACTTTTTTTTTCTGGAA  
ACGGTTAA

CACTTGAATAATGGCACTGTATTGATGCATTTTCTTTATGCTTAGTGACGCGTTTTTCGCGCGTCAGTTTC  
AAGTTTTCTTGGCTTTTTTTTTTTTCATTTTCGTAAAGGGTCTTAAAAGGATTAAAAAATGCAGTATTGAA  
ATAAAGAA

GGTGACTGTATCTACGTATCTATAAAAAAAGGTTAACTACCGGAAAATCATTCTTCTCGTAAAGTGTATA  
TTTAGGTTCCGAAATCATAAACATTGTTTTTTTTGTGTTTTTTATTTTTAAATAAAAAGAATAAATATTTTA  
TATAAAAA



AAATGAGCGAAAATTTTTCAAGCCCACCGCTAAAAAAAAAAAAAAAAAGAAAAAAAAAGGGACATAAATACGT  
ATATCTCCAGAAAATGCCAGTGGAGTGGATGAATACCTGATGGGCTATATTACTACATTATTGAAAACGT  
TTACCAA

AAAAAATAGCCAAATGTCAAACCTCAAATAGTGTGTTGTGACGCTTATGTAATGATAGTAATAGAATCCAA  
AAAAAAAAAAAAATATACATGCTTTTTTCATATCCTCTCTCACCTATCTTTTTTTTTCTTCTAATTTTGGCT  
CCGTTTCAT

CTCGATAAGGGTACATTTTTTATTTTTCCCATTAAGTGAAATTTCTTCAAATTATTCTCGAAGCTTTCATG  
CCATTGGTGACACGAAAAAAAAATCTTGTTGTATTTTTATCTAACGCGTCGCGACGCGTTAGATAAATATAA  
CAGTAAAT

TGAAAAAAAAAAGGTGAACACAGGAAAAAAAAAAAAAAAAAAAAAAAAAGGAGGACGAAACAAAAAA  
GTGAAAAAAAAATGAAAATTTTTTTGGAAAACCAAGAAATGAATTATATTTCCGTGTGAGACGACATCGTCG  
AATATGAT

TGGTATTTTTGTTATACACAACGCGTCTTGGTTAGGCATCTGTTTTGTTTTAGCTATTGTTTCATCGCGTTTT  
TTTTTTTTCTTATCTCTTTTACCGAGGGGCGAAAATAGCGATAGATCGAGAATATAAATAAATAAATATTG  
TTGTGTTG

GAACACGTGGATGTCCCAGGTCATTTATCTGCCATTGCCTTTGTTTACGAGTATATCGTTAATGTTAACGA  
ATACGCTTAAGCGCAATCATTGAATAGTCAAAGATTTTTTTTTTTTTAATTTTTTTTTTTTTAATTTTTTTTT  
TTTCATAG

ACTATAAATTAGTAAATATACTATCCGTTGCAAGTCTTTAAGAGCTACATTAATTTGAAATTTGTCGAGTGT  
CGCCAACAACAATTCGCGAAAATGAGCGAAAATTTTTCAAGCCCACCGCTAAAAAAAAAAAAAAAAAGAAA  
AAAAGGGA

TTGTGTGCAATGTTAAAAATGGTGACTGTATCTACGTATCTATAAAAAAGGTTAACTACCGGAAAATCAT  
TTCTTCTCGTAAAGTGTATATTTAGGTTTCGGAAATCATAAACATTGTTTTTTTTGTGTTTTTTATTTTTAA  
TAAAAAGA

GGTTAACTACCGGAAAATCATTCTTCTCGTAAAGTGTATATTTAGGTTTCGGAAATCATAAACATTGTTTT  
TTTGTGTTTTTTTTATTTTTAAATAAAAAGAATAAATATTTTATATTAATAAATAAATTTTAAAGTAAATTAA  
TTATTTAA

AAAATTTTCCAGTGAATTTTACTCGCGATGACTCAAGAGCGTGAAAAAAAAAAAAAAAAAAAAAAAAATTAATT  
GCTAAAAAATCAAATATATGCTTCCAATCGGATTTGAACCGATGATCTCCACATTACTAGTGTGGCGCCTT  
ACCAACTT

CCTTGTATTTATATAAACAAAGATATAATTTTTAAAAAAAAAATTAGAAAAAGCAAATATAATTCAGGTCCC  
ACTTGAATAATGGCACTGTATTGATGCATTTTCTTATGCTTAGTGACGCGTTTTTCGCGCGTCAGTTTTCA  
AGTTTTTC

GTCAAACAGGAAATATTGCCTATTTTCGTACAAGGTTACTTCTTAGATGCTATATGTCCCTTTACATAATA  
AATTAAAAAATTTTTTTATAAATTATAATAATTTCTTTTTATTTCTAATAGTATCTTGGGATTAATAAA  
TCACTTAC

TATTGATGCATTTTCTTATGCTTAGTGACGCGTTTTTCGCGCGTCAGTTTCAAGTTTTTCTTGGCTTTTTT  
TTTTTCATTTTCGTAAAGGGTCTTAAAAGGATTAAAAAATGCAGTATTGAAATAAAGAACAATTACGAACG  
GTGAAGCT

ATAAGTTTTGTATGTACATTTATTAATATATATAATATATCAAAAGAAAAAAAAATCAAAAAAAAAAAAAAA  
AAAAATTGCACTCTTATTCAGTCATCAATTACAAAACCTAGAGATAGCGATGGTGCATATTTCAATAAAAAA  
CTCCTTAT

ATTATTCTCGAAGCTTTCATGCCATTGGTGACACGAAAAAAAAATCTTGTTGTATTTTATCTAACGCGTCCG  
CGACGCGTTAGATAAATATAACAGTAAATGATGGTATAAATGCCACCGTCGATATTTAAATGAGATTGCTT  
ATATATCG

TGACAGTCTAGCTCCTATAGACGAAAAGAAGGTCCCAATGCTAAAGGACACCAAGAATAAAATCGAAAATG  
AGCATGTAATATGGGAAAAAGTGTACGAATCAAAGACAAAATAATATAGTTGCAATAATAGTAATAATAAT  
AATAATAA

ACACGAAAAAAAAATCTTGTTGTATTTTATCTAACGCGTCGCGACGCGTTAGATAAATATAACAGTAAATG  
ATGGTATAAATGCCACCGTCGATATTTAAATGAGATTGCTTATATATCGCATTATTACCTGCGAAAATCTA  
ATTTACGA

ATGCAAAATTCGTGGCTCAGTGCTCTCAAGACAATGTTGCAACCCTTTGCGTCAATTATATATATATATAT  
ATATATATATATATATATATATATATATATATATATATATATATATATATATATATATATATATATATAT  
AAAAAGCT

ATATATTGAAAAATTTTCCAGTGGAATTTTACTCGCGATGACTCAAGAGCGTGAAAAAAAAAAAAAAAAAAAA  
AAAATTAATTGCTAAAAATCAAATATATGCTTCCAATCGGATTTGAACCGATGATCTCCACATTACTAGT  
GTGGCGCC

TGGCCATCCTAAATAGAATAAGCATCCACAACAATAAACTGGTATTTTGTATACACAACGCGTCTTGGT  
TAGGCATCTGTTTTGTTTTAGCTATTGTTTCATCGCGTTTTTTTTTTTTCTTATCTCTTTTACCGAGGGCGA  
AAATAGCG

TATTTTTTTTTTATTTTTTTGTAGGTTCTTTGGCCATCCTAAATAGAATAAGCATCCACAACAATAAACT  
GGTATTTTGTATACACAACGCGTCTTGGTTAGGCATCTGTTTTGTTTTAGCTATTGTTTCATCGCGTTTTT  
TTTTTTCT

GTAGGTTCTTTGGCCATCCTAAATAGAATAAGCATCCACAACAATAAACTGGTATTTTGTATACACAAC  
GCGTCTTGGTTAGGCATCTGTTTTGTTTTAGCTATTGTTTCATCGCGTTTTTTTTTTTTCTTATCTCTTTTAC  
CGAGGGGC

AAAGTAGGGCAAATTCATGATCGACCGCGCAAATAAATAGATTTGCAAATAAGTTTTGTATGTACATTT  
ATTAATATATATAATATATCAAAAAGAAAAAATCAAAAAAAAAAAAAAAAAAAAAAATTGCACTCTTATTCAG  
TCATCAAT

AGGTGGCCCTTGAATAAATACAGCACTTTCTCGCATCTACCTCAACTGAAAAAAAAAAAAAAAAAAAAA  
ACGCCCTTTAAGACGAAGTGACAAAGAGGCAATAGTTCAAAGAAAAAAAAAAAAAAAAATATAAAGACTGTTGA  
TAGTTGAA

CTGGGCGCGACATTCCAAAAAAAAAATAAAAAAGAAGAGAAAATACTGGCTTATGAATACAAAAATTACAT  
AAACGAAGCAAATGATTATTTTGAATAAAACAGTCTATATATAAGTCAAATACAAGATAGGAAGAAAAAC  
AGAAAAA

TCGAGGGGTTTTTTTATTCGAGATAGTAACTTCTGACTTTTTCGCTTTTTATACAGCACAGCAGAAAAAAAAAG  
CCGCCGAGGCGCGCGTTTCATGCAATGGCTCAGTAACCTCGTGATAGAAAAGGGCAACAATATTGGGCT  
ATTTTAGG

AGAGCTACATTAAATTGAAATTGTCGAGTGTGCGCAACAACAATTCGCGAAAATGAGCGAAAATTTTTCAA  
GCCACCGCTAAAAAAAAAAAAAAAAAGAAAAAAGGGACATAAATACGTATATCTCCAGAAAATGCCAG  
TGGAGTGG

TTGTCGAGTGTGCGCAACAACAATTCGCGAAAATGAGCGAAAATTTTTCAAGCCCACCGCTAAAAAAAAA  
AAAAAAGAAAAAAGGGACATAAATACGTATATCTCCAGAAAATGCCAGTGGAGTGGATGAATACCTGA  
TGGGCTAT

CCATACCATCTATTGACATAATCTACGATGTGAGAGCTGTATGATATTGTGGAACTTTGTATATATTGAAA  
AAATTTTCCAGTGGAATTTTACTCGCGATGACTCAAGAGCGTGAAAAAAAAAAAAAAAAAAAAAATTAATTG  
CTAAAAAA

ACGAAAAGAAGGTCCCAATGCTAAAGGACACCAAGAATAAAATCGAAAATGAGCATGTAATATGGGAAAAA  
GTGTACGAATCAAAGACAAAATAATATAGTTGCAATAATAGTAATAATAATAATAATAATAATAATA  
TAATAATA

TCCCATCTCAAAAGTAGGGCAAAATTCATGATCGACCGCGCAAAATAAATAGATTTGCAATAAGTTTTGT  
ATGTACATTTATTAATATATATAATATATCAAAAAGAAAAAATCAAAAAAAAAAAAAAAAAAAAAATTGCAC  
TCTTATTC

CAAACAAGATCCTTGTATTTATATAAAACAAAGATATAATTTTTAAAAAAAATTAGAAAAAGCAAATATAA  
TTCAGGTCCCACTTGAATAATGGCACTGTATTGATGCATTTTCTTATGCTTAGTGACGCGTTTTTCGCGC  
GTCAGTTT

TCTTTTGCTGTTACTATGTGTTTTAAGAGAGAGCTGTTCTACAAAGAACTTTTCATTTACGCGTTTTTCT  
TTTTTTTTTTTTTCTCATCTAAACGCGTAAATCTGTTCCCTTTTTTCATGTAATGGGCGTACAACCGACGAT  
GGAAAAAT

TTTTTATTCGAGATAGTAACTTCTGACTTTTTCGCTTTTATACAGCACAGCAGAAAAAAAAGCCGCCGAGGC  
GCGCGCTTCATGCAATGGCTCAGTAACCTCGTGATAGAAAAAGGGCAACAATATTGGGCTATTTTAGGCA  
AAGAACT

AAAATGCTCAAAAAAATAGCCAAATGTCAAACCTCAAATAGTGTGTTGTTGTACGCTTATGTAATGATAGTAA  
TAGAATCCAAAAAAAAAAAAAAAAATATACATGCTTTTTTCATATCCTCTCTCACCTATCTTTTTTTTTCTTCT  
AATTTTGG

AAAGGAAAGCAGGAAAGGAAAAAATTTTTAGGCTCGAGAACAATAGGGCGAAAAAACAGGCAACGAACGAA  
CAATGGAAAAACGAAAAAAAAAAAAAAAAAACACAGAAAAGAAATGCAGAAAAGATGTCAACTGAAAAAAAAAA  
AGGTGAAC

CGTGGCTCAGTGCTCTCAAGACAATGTTGCAACCCTTTTCGCTCAATTATATATATATATATATATATATAT  
ATATCCCGTCCGCTTTCTTTTTTTTTGTGAGTTGGGTCGCAACGCAGGGTCTCGAGACCTGAAAAAGCTTC  
ATAGCGAT

TTTTAAAAAAAATTAGAAAAAGCAAATATAATTCAGGTCCCACTTGAATAATGGCACTGTATTGATGCAT  
TTTTCTTATGCTTAGTGACGCGTTTTTCGCGCGTCAGTTTCAAGTTTTTCTTGGCTTTTTTTTTTTTCATTTT  
CGTAAAGG

AGGATGATGGGAAAAAAAAGATAATTTTTTTTTTTTTGTTTTTCCCTGCTTCCTTCTTGTATTATTGGTATTA  
TTATGTTACGATATTCATTCATTATCCTATTGATATTTTTCTTTATATTCCTAAAAAAAATTTATTCTAT  
AAGACTGA

AAATATTGCCTATTTTTCGTACAAGGTTACTTCTTAGATGCTATATGTCCCTTTACATAATAAATTAAAAAA  
TTTTTTTTTATAAATTATAATAATTTCTTTTTATTTCTAATAGTATCTTGGGATTAATAAATCACTTACAA  
TATTTATT

CCTTCCCTTATTCTCAATATATATGTAATACGTCGTATTTGATATATATATATATATATATATAATATAAT  
TTAACGGTTGTTATCTGCTACATCTGTAAAATAAAAAATAAAATGCTTGAAGCGGCTGTACTTAAAAATAAA  
CTCATCTA

TAGAACAATAAGGATGATGGGAAAAAAAAGATAATTTTTTTTTTTTTGTTTTTCCCTGCTTCCTTCTTGT  
ATTGGTATTATTATGTTACGATATTCATTCATTATCCTATTGATATTTTTCTTTATATTCCTAAAAAAA  
TTTATTCT

GAGACCTTTTCCCCGTTCCCAAAAAGAAAAAAAAAAAAAAAAAAAAAAAAAGAAAACGAGCCTTCATCACGTGCAT  
TAAAGAAATAGTAATCCCAACGCACTCATCCGCTATATACATAGCGAAAACTATATGCCCACTTCACAAA  
TACGAGTT

ATATACACTGAATCATATAAACTTTTTTTTTATATTGAATCTAATATATTATCAAACGGAACTTCGGCTGA  
ATTTTCATACGTATATTGATTAAAGTGGAAAGGCATCGGAAAAGTAAGAAAAGCTTAAAAAATTGAAAA  
AAAAAAA

AGATGGCAGTTCGAGGGGTTTTTTTATTTCGAGATAGTAACTTCTGACTTTTTCGCTTTTATACAGCACAGCAG  
AAAAAAAAAGCCGCCGAGGCGCGCGTTCATGCAATGGCTCAGTAACCTCGTGATAGAAAAGGGCAACA  
ATATTGGG

TATTCATATGTATCAAAGATACCTATGGGAACTGCTAAAAGCAACTATTTTGATCCCGTAGAACACGATTT  
ATTTTCATTAATTTTTTTTTTTTTTTTTTTTTTTTTTTTCACTTTCTTGCGATGAGATGCACATAGTAAAAGAAA  
GTATACCA

ACAGGAAAAAAAAATAAAAAAAAAAAAAAAAAAGGAGGACGAAACAAAAAGTGAAAAAAAAATGAAAATTT  
TTTTGGAAAACCAAGAAATGAATTATTTCCGTGTGAGACGACATCGTCAATATGATTCAGGGTAACAG  
TATTGATG

GACAGAAAAATAATGGCACCGTTGACGTCGAAAATACATCCGCGCAAATTTTGACAGGCTATTTTGGCAGC  
GCAATCAAAGAATAAACTTGGTATAGTAAGGAAGCCAGTTACTGTACGCATGAATTACGGTAGCTTTTTTT  
ATTTTATT

ACATATTTATGCTTCAAACTTTTTGTCAATTTGTCTTCCATCCTTCCCTTATTCTCAATATATATGTAATAC  
GTCGTATTTGATATATATATATATATATAATATAATTTAACGGTTGTTATCTGCTACATCTGTAAAA  
TAAAAATA

TATTTTTCGTACAAGGTTACTTCCCTAGATGCTATATGTCCCTTTACATAATAAATTAAAAAATTTTTTTTAT  
AAATTATAATAATTTCTTTTTATTTCTAATAGTATCTTGGGATTAATAAATCACTTACAATATTTATTTT  
ATTATATT

AAATTTTTCAAGCCCACCGCTAAAAAAAAAAAAAAAAAGAAAAAAGGGACATAAATACGTATATCTCCAG  
AAAATGCCAGTGGAGTGGATGAATACCTGATGGGCTATATTACTACATTATTGAAAACGTTTACCAAAG  
TTTCGTTA

TATTAATATATATAATATATCAAAAAGAAAAAATCAAAAAAAAAAAAAAAAAAATTCGACTCTTATTCA  
GTCATCAATTACAAAACCTAGAGATAGCGATGGTGCATATTCAATAAAAAACTCCTTATACTGTGAGAAA  
GCTTATTA

TTTCCTTCAAATTATTCTCGAAGCTTTTCATGCCATTGGTGACACGAAAAAAAAATCTTGTTGTATTTTATC  
TAACGCGTCGCGACGCGTTAGATAAATATAACAGTAAATGATGGTATAAATGCCACCGTCGATATTTAAAT  
GAGATTGC

CTCTTTTCTTCTCTTTACTGAGGTGGCCCTTGAATAAATACAGCACTTTCTCGCATCTACCTCAACTGAAA  
AAAAAAAAAAAAAAAAAAAAACGCCCTTTAAGACGAAGTGACAAAGAGGCAATAGTTCAAAAAGAAAAAAA  
AAAAATAT

TAAAATCTGCGTCAAACAGGAAATATTGCCTATTTTCGTACAAGGTTACTTCCCTAGATGCTATATGTCCCT  
TTACATAATAAATTAAAAAATTTTTTTTATAAATTATAAATTTCTTTTTATTTCTAATAGTATCTTGGG  
ATTAATA

ATATAAACAAAGATATAATTTTTTAAAAAATTTAGAAAAAGCAAATATAATTCAGGTCCCACTTGAATA  
ATGGCACTGTATTGATGCATTTTCTTATGCTTAGTGACGCGTTTTTCGCGCGTCAGTTTCAAGTTTTTCTT  
GGCTTTTT



AGCTAATAGATTTATTTTTCTTTTTTTTTTACAGTTCCACTTGCATCCCTCATTTCACATTCCTTTTT  
TTATAGAAAAGCATATCACTATATAAAAATTCTATTATAGTTGTAACAGCATAGCATATTATAGACTTTTT  
TTTTCTGG

AGGATATTGTCTTGGTGGCGTCTTTTGCTGTTACTATGTGTTTAAGAGAGAGCTGTTCTACAAAGAACTTT  
TCATTTACGCGTTTTTTCTTTTTTTTTTTTTTCTCATCTAAACGCGTAAATCTGTTCCCTTTTTTCATGTA  
ATGGGCGT

AAAGGTGAACACAGGAAAAAAAAATAAAAAAAAAAAAAAAAAAAGGAGGACGAAACAAAAAGTGAAAAAA  
ATGAAAATTTTTTTGGAAAACCAAGAAATGAATTATATTTCCGTGTGAGACGACATCGTCGAATATGATTC  
AGGGTAAC

GACCATTTATTGGCTTAAAAGATTTTAACCAAGAGCAATCCTATGGAACGTTCTGTCCCACTTCACTCAAG  
TTTTTGAAAGGGTAAAAATTAATAAATTATAGAATTAACAGTAAAATGTGCTACGTTCCAAAAA  
ATATGCAC

TATATGTCCCTTTACATAATAAATTAATAAATTTTTTTATAAATTATAATAATTTCTTTTTATTTCTAAT  
AGTATCTTGGGATTAATAAATCACTTACAATATTTATTTTATTATATTGCTTTGTTCAATTAATTTTAA  
TACGAAAT

CTCAACTGAAAAAAAAAAAAAAAAATAAAAAACGCCCTTTAAGACGAAGTGACAAAGAGGCAATAGTTCA  
AAAGAAAAAAAAAAAAAAAAATAAAGACTGTTGATAGTTGAATTTTTATAAACGTTATGTTAAGTATATGTATT  
GATGGAAG

TACAGTTCCACTTGCATCCCTCATTTCACATTCCTTTTTTTATAGAAAAGCATATCACTATATAAAAAAT  
TCTATTATAGTTGTAACAGCATAGCATATTATAGACTTTTTTTTTCTGGAAACGGTTAAACCGTTTGGCTG  
AGATGCAA

TGAGAGCTGTATGATATTGTGGAACTTTGTATATATTGAAAAATTTTCCAGTGGAATTTTACTCGCGATG  
ACTCAAGAGCGTGAAAAAAAAAAAAAAAAAATTAATTGCTAAAAAATCAAATATATGCTTCCAATCGG  
ATTTGAAC

GTATATTGATTAAGTGGAAGGGCATCGGAAAAGTAAGAAAAGCTTAAAAAATTGAAAAAAAAAAAAA  
AAAAATAAAAAATAAAAAATAAAAAACCTATACAATACATACATATGTATATGAATATAAACCTGGAACG  
ATGTGTCT

CACCGTCATTGATCAAATAGGTCTATAATATTAATATACATTTTATATAATCTACGGTATTTATATCATCAA  
AAAAAGTAGTTTTTTATTTATTTTATTTTGTTCGTTAATTTTCAATGTCTATGGAAGCCCGTTTCGTAAAA  
TTGGCGTT

AGTAAATATACTATCCGTTGCAAGTCTTTAAGAGCTACATTAATTTGAAATTGTGCGAGTGTGCGCAACAAC  
AATTCGCGAAAATGAGCGAAAATTTTTCAAGCCACCCTAAAAAAGAAAAAAGGGACATAAATACG  
TAAATACG

CTATCCGTTGCAAGTCTTTAAGAGCTACATTAATTTGAAATTGTGCGAGTGTGCGCAACAACAATTCGCGAA  
AATGAGCGAAAATTTTTCAAGCCACCCTAAAAAAGAAAAAAGGGACATAAATACGTA  
TATCTCCA

ACCTATGGGAACTGCTAAAAGCAACTATTTTGATCCCGTAGAACACGATTTATTTTCAATTAATTTTTTTTT  
TTTTTTTTTTTTTTCACTTTCTTGCGATGAGATGCACATAGTAAAAGAAAAGTATACCAGTGTAGTGCGTA  
AATTAATA

AGCAAATATAATTCAGGTCCCACTTGAATAATGGCACTGTATTGATGCATTTTCCTTATGCTTAGTGACG  
CGTTTTCGCGCGTCAGTTTCAAGTTTTCTTGGCTTTTTTTTTTTTCAATTTTCGTAAAGGGTCTTAAAAGGA  
TTAAAAA

AGTGCTATAGCAAGTGGGCTTTTGCCTGCTTATCTTTCTCACTCCAACCGCTGCATCGTTTTTCAGTAAGAA  
GGAGCCCTTTCCCATAGCAAATGATAGAAAAATAGTCAATAATTGAACGAAGAAAAAAAAAAGAAAGTTT  
GTTTCATAA

AAGCTTAAACCAAGGGAAGCAAAATTTGAAATACCGAAGGTAGAACAATAAGGATGATGGGAAAAAAAAAGA  
TAATTTTTTTTTTTTTGTTTTTCCCTGCTTCTTCTTGTATTATTGGTATTATTATGTTACGATATTCATTCA  
TTATCCTA

ACGCTTTATAGATCACTTTTTTTTTTTTTTTGAGGAACCGATTAATTAATACATCGTAGCCTCTGCTTATTG  
CATAACACAACAAAAAATACAATAATACGCAACTTTTGTATTATAGAAAAATAAAAATGGAACATATGATA  
TTCTCTGT

GCAACTATTTTGTATCCCGTAGAACACGATTTATTTTATTAAATTTTTTTTTTTTTTTTTTTTTTCACTTT  
CTTGCGATGAGATGCACATAGTAAAAGAAAAGTATACCAGTGTAGTGCGTAAATTAATACCTATATAATAA  
TTCATTTT

GAGGGTTTGAAAAATGCTCAAAAAAATAGCCAAATGTCAAACCTCAAATAGTGTGTTGTACGCTTATGTA  
ATGATAGTAATAGAATCCAAAAAAAAAAAAAAAAATATACATGCTTTTTTCATATCCTCTCTCACCTATCTTTT  
TTTTTCTT

ATCTCAAGGAATGCAAAATTCGTGGCTCAGTGTCTCAAGACAATGTTGCAACCCTTTGCCTCAATTATAT  
ATATATATATATATATATATATATATATATATATATATATATATATATATATATATATATATATATATAT  
CGAGACCT

GAAAAAAAAAGCCGCCGAGGCGCGCGCTTCATGCAATGGCTCAGTAACCTCGTGATAGAAAAAGGGCAAC  
AATATTGGGCTATTTTAGGCAAAGAAACTCAGCTATTCGAAAAGGGCATCCATTTCAATTTCCGGTTTTCTA  
TCTAGCCA

GATAGTAACTTCTGACTTTTTCGCTTTTATACAGCACAGCAGAAAAAAAAAGCCGCCGAGGCGCGCGCTTC  
ATGCAATGGCTCAGTAACCTCGTGATAGAAAAAGGGCAACAATATTGGGCTATTTTAGGCAAAGAAACTCA  
GCTATTTCG

TAAATGTTATGTTCCATGTTGTGTTTTCCACCAAAAAACCGTGAAGGACAATTCAATGAGCAAAGGGTTTA  
ACGGAGCTATAACCTGCTTTTGTAGATGAAAAATAGAAAATTCAAATATATATATATATATATATATATATAT  
ATAGCATG

TAAAGTGAAAGGGCATCGGAAAAGTAAGAAAAGCTTAAAAAATTTGAAAAAAAAAAAAAAAAAAAAATAAAA  
AATAAAAAATAAAAAACCTATACAATACATACATATGTATATGAATATAAACCTGGAACGATGTGTCTTT  
AAAAATAG

CAAAATAAATAGATTTGCAAATAAGTTTTGTATGTACATTTATTAATATATATAATATATCAAAAAGAAAA  
AATCAAAAAAAAAAAAAAAAAAAAAAATTGCACTCTTATTTCAGTCATCAATTACAAAACCTAGAGATAGCGAT  
GGTGCATA

ATGTTTGTATGCCATACCATCTATTGACATAATCTACGATGTGAGAGCTGTATGATATTGTGGAACTTTGT  
TATATTGAAAAATTTTCCAGTGGAATTTTACTCGCGATGACTCAAGAGCGTGAAAAAAAAAAAAAAAAAAAA  
AAATTAAT

GCTGATTCGCCGCATATGCATTGTGTAGATCCAAAAGTAAGGACAAGATATCATGGGATGAAGAAGAACA  
GGCGCGATTAATGGGCGTTGTAAAATTTAATTCAGAGCATTACAGGGACTAGGAAATAATACTAATTAAT  
AATTCTAA

TAGATTTGTGAGCGCATTGGCGCGACCCATTTTTTTTAAACACAGAAAAAAGTAAAAAATAGAAATTACCCA  
ATTAAGTGTTTTTATAGTAAACAATCCTTGATATCTTAGTTGAAAATAAACTCGAATTATGTACAAGTTTC  
CTTCCACT

CTCATAGATGCAGAAAATGATGACAGTCTAGCTCCTATAGACGAAAAGAAGGTCCCAATGCTAAAGGACAC  
CAAGAATAAAATCGAAAATGAGCATGTAATATGGGAAAAAGTGTACGAATCAAAGACAAAATAATATAGTT  
GCAATAAT

TTAAAAGAAAGCGGCAATAGCCTTTCCTTTCTTAGCCGAAAACCTTACTACGGGAACAAGTTTTTTTTTATT  
AGTATAATGTAGATATAAAAAGCTTAGAGTTTATATAAATAATAAAAAGTTAGCACTGCTGTTGCAAAAA  
TATCGAAT

CAGCACAGCAGAAAAAAAAGCCGCCGAGGCGCGCGCTTCATGCAATGGCTCAGTAACCTCGTGATAGAA  
AAAGGGCAACAATATTGGGCTATTTTAGGCAAAAGAACTCAGCTATTCGAAAAGGGCATCCATTTCAATTC  
CGGTTTTTC

TGGCTTAAAAGATTTTAAACCAAGAGCAATCCTATGGAACGTTCTGTCCCACTTCACTCAAGTTTTTGAAAG  
GGTAAAAATTAATAAATTATAGAATTAACAGTAAAATGTGCTACGTTCCAAAAAATAATATGCACTA  
TAGTATAT

CAAGTGGGCTTTTGCCTGCTTATCTTTCTCACTCCAACCGCTGCATCGTTTTTCAGTAAGAAGGAGCCCTTT  
CCCCATAGCAAATGATAGAAAAATAGTCAATAATTGAACGAAGAAAAAAGAAAGTTTGTTCATAAAA  
GAATATCA

AGCCCACCGCTAAAAAAGAAAAAAGGGACATAAATACGTATATCTCCAGAAAATGCCCA  
GTGGAGTGGATGAATACCTGATGGGCTATATTACTACATTATTGAAAACGTTTACCAAAGTTTCGTTACT  
GTATAAAA

TCCTAGATGCTATATGTCCCTTTACATAATAAATTAATAAATTTTTTTTTATAAATTATAATAATTTCTTTT  
TATTTCTAATAGTATCTTGGGATTAATAAATCACTTACAATATTTATTTTATTATATTGCTTTGTTCAAT  
TAAATTTT

CAAGGTTACTTCTTAGATGCTATATGTCCCTTTACATAATAAATTAATAAATTTTTTTTTATAAATTATAAT  
AATTTCTTTTTATTTCTAATAGTATCTTGGGATTAATAAATCACTTACAATATTTATTTTATTATATTGC  
TTTGTTCA

TTACTATGTGTTTTAAGAGAGAGCTGTTCTACAAAGAACTTTTCATTTACGCGTTTTTTTCTTTTTTTTTTT  
TTCTCATCCTAAACGCGTAAATCTGTTCCCTTTTTTCATGTAATGGGCGTACAACCGACGATGGAAAAATGA  
ATCTTGCA

TAAAAAAGAAAAAAGAAAAAAGGGACATAAATACGTATATCTCCAGAAAATGCCAGTGGAGTGGA  
TGAATACCTGATGGGCTATATTACTACATTATTGAAAACGTTTACCAAAGTTTCGTTACTGTATAAAAA  
ATTGGGGT

TGTCTTCCATCCTTCCCTTATTCTCAATATATATGTAATACGTCGTATTTGATATATATATATATATATAT  
ATAATATAATTTAACGGTTGTTATCTGCTACATCTGTAAAATAAAAATAAAAATGCTTGAAGCGGCTGTAC  
TTAAAATA

GGAAATCATAAACATTGTTTTTTTTGTGTTTTTTATTTTTAAATAAAAAGAATAAATATTTTTATATAAAAA  
ATAAATTTTAAAGTAAATTAATTATTTAACACGTGATTAAGTTACTCTAATATAATCCTATTTAATAATTA  
GTAGAGTT

GGTCCCAATGCTAAAGGACACCAAGAATAAAATCGAAAATGAGCATGTAATATGGGAAAAAGTGTACGAAT  
CAAAGACAAAATAATATAGTTGCAATAATAGTAATAATAATAATAATAATAATAATAATAATAATAATAAT  
AATAATAA

CGCGACCCATTTTTTTTAAACACAGAAAAAAGTAAAAAATAGAAATTACCCAATTAAGTGTTTTTTATAGTAA  
ACAATCCTTGATATCTTAGTTGAAAATAAACTCGAATTATGTACAAGTTTCCTTCCACTTAATCTATGATC  
CTTCTTTA



ATTTAGGTTTCGGAAATCATAAACATTGTTTTTTTTGTGTTTTTTATTTTTAAATAAAAAAGAATAAATATTTT  
ATATTAATAATAAATTTTAAAGTAAATTAATTATTTAACACGTGATTAAGTTACTCTAATATAATCCTAT  
TTAATAAT

TGATCCCGTAGAACACGATTTATTTTATTAAATTTTTTTTTTTTTTTTTTTTTTTTTTTTCACTTTCTTGCGATGA  
GATGCACATAGTAAAAGAAAAGTATACCAGTGTAGTGCGTAAATTAATACCTATATAATAATTCATTTTTCG  
GTGACTCA

TGTATTTTATCTAACGCGTCGCGACGCGTTAGATAAATATAACAGTAAATGATGGTATAAATGCCACCGTC  
GATATTTAAATGAGATTGCTTATATATCGCATTATTACCTGCGAAAATCTAATTTACGACTCCTTGAAAA  
ATTCCATC

AACGGCCCTTTTCGTGACTGCAAATGATACTAATTCCTGTATTTAAATATACTCATATTTAACGAACAATT  
ATGATGAATGAAAAACCTGATATAATAGACTTAACTAAGCGATCATAAAAAAATTCAAAAAGTTATTTTA  
TAAACAA

AGTGGAAATTTTACTCGCGATGACTCAAGAGCGTGAAAAAAAAAAAAAAAAAAAAAAAAATTAATTGCTAAAAAAT  
CAAATATATGCTTCCAATCGGATTTGAACCGATGATCTCCACATTACTAGTGTGGCGCCTTACCAACTTGG  
CCATAGAA

GAACTTTTTTTTGATTTGTTATATAATAACAGAAAATCCAGATTTGTACAGAAAGAAAATCCGTGATAGTT  
TAATGGTCAGAATGGGCGCTTGTGCGGTGCCAGATCGGGTTCAATTCCCCTGCGGAGATTTTTTTGGC  
TACTGTTG

TATCTTTCTCACTCCAACCGCTGCATCGTTTTTTCAGTAAGAAGGAGCCCTTTCCCATAGCAAATGATAGAA  
AAATAGTCAATAATTGAACGAAGAAAAAAAAAAGAAAGTTTGTTCATAAAAGAATATCATATTATATATAT  
ATATAGGG

ATCTTTGGGCTAAAATCTGCGTCAAACAGGAAATATTGCCTATTTTCGTACAAGGTTACTTCCCTAGATGCT  
ATATGTCCCTTTACATAATAAATTAATAAATTTTTTTTTATAAATTATAATAATTTCTTTTTATTTCTAATA  
GTATCTTG

GAATTGAGGAAATTCCTTTTCTCCTTTGTTTTCTCTTTATCCCCGCGTAAATACGCGGAATGCCAATAATC  
AAGTACACATTCTTTCTCCAAGTTGGCCAAAAAATAGTTCAAATTCCTTAACTAAGCGCTATTAATTATT  
ATTAATTA

GAAAAAAGATAATTTTTTTTTTTTTGTTTTTCCCTGCTTCCCTTCTTGTATTGGTATTATTATGTTACG  
ATATTCATTCAATTATCCTATTGATATTTTCTTTATATTTCACTAAAAAATTTATTCTATAAGACTGACT  
ATAATTTT

ATTCGTACAGTTGTGTGCAATGTTAAAAATGGTACTGTATCTACGTATCTATAAAAAAGGTTAACTACC  
GGAAAATCATTTCTTCTCGTAAAGTGTATATTTAGGTTTCGGAAATCATAAACATTGTTTTTTTTGTGTTTTT  
TATTTTTA

CGCTTTTATACAGCACAGCAGAAAAAAAAAGCCGCCGAGGCGCGCGTTCATGCAATGGCTCAGTAACCT  
CGTGATAGAAAAAGGGCAACAATATTGGGCTATTTTAGGCAAAGAACTCAGCTATTCGAAAAGGGCATCC  
ATTTCAAT

TTGACAGGCTATTTTGGCAGCGCAATCAAAGAATAAACTTGGTATAGTAAGGAAGCCAGTTACTGTACGCA  
TGAATTACGGTAGCTTTTTTTATTTTATTTATTTTTTTTTTTTTTTGGACAAATAGAAAAATTTTATTATT  
ATGTAAGA

TTTAAGAGAGAGCTGTTCTACAAAGAACTTTTCATTTACGCGTTTTTTTCTTTTTTTTTTTTTCTCATCCT  
AAACGCGTAAATCTGTTCCCTTTTTCATGTAATGGGCGTACAACCGACGATGGAAAAATGAATCTTGCAAT  
TTTAATAC



AATTCCAAAAAAAAAAGTAAAAAACAAAACCTTTGATTGTTTTTTAATGATGTTAATGATTTTTTTTTTTTC  
TTTCTTTATCATAAAAAAAAAAGTTAAAATGAAAAACAAATATGGGTCTGGAAGGCCATTATTTTTTTTTTTA  
TTTATATA

ATTATTATTATTATTATTATTATTATTACGGTATGTCAAGTATTATTTTTTTTTTTAAAAATAAAGAAAAA  
ATTGTACAAATATATATATTTATATATTACTCTATATGGTTTTTTTTTTTTTTAAGTGCAGGCGTTGGTTATG  
CTTCGTCT

TGATGCGATGCGATGTTAGCGCAACAATAACGCGTACGATAATAAACTTCAAATGCGCCAATTCTTTTT  
TTTTTTTTTTTTTTTTTTGATTTCTTTTCATATATCCGATTTAAACCGCCTAGGGAAGAGTAAAAACCCG  
AATTGTTC

TTTTTTTTCTTCAATTCGATAGTTTAGATGGGTTTATATCTAAATATATATATATAGTATTTTATTTTCATA  
TTCAATCTCCTAGTATACATGAAATATTTAACGCTTTTTTTTTGCCCTTGTTTTATTTTTTTTTCTTTTTTG  
AAGCTGCA

ACGCGTACGATAATAAACTTCAAATGCGCCAATTCTTTTTTTTTTTTTTTTTTTTTTTTTTTGATTTCTTTTC  
ATATATCCGATTTAAACCGCCTAGGGAAGAGTAAAAACCCGAATTGTTCCGTCTATACTTGGTTGTATGGG  
TGTTTTTTT

TGCAAGGACCATCATTGTTTGAAAAAGAGAGGATATTACTAGTAGGTAATAACAGCTATGTCGCGTTATA  
TATATTATATATAAAAAATTAAAAAATAGAAAATAAAATTTCAAATGCCCTCTGTGGGAATTGAACCCACGA  
TCCCGCA

TGCGAAGAAAGAAAAAGAAAATATTCACCTCTAGGAGCCAAAAACATAAAAAAAAAAATAATTAAAAAA  
CTTTTATTGAATGCTTAATTATTTAGTGACGCGATTACCTATATACCAGGTTATTTATTTTTCTTTTTTC  
AAAGGAAA

GTTGAAATACCCTATACTAATTGTTTGCTTTGTCTTTTTGTATATATCCGAACGTATCTATCTGAAATTTT  
TCAAATTTATAAAAAATAATATATATAAAAAGGAAAAAAAAAAAAATCGATGCCCTACTAATAGAGATTGGA  
GCTGAAA

ATTGTATTATTGTATTATTATTATATTATTATTATTATTATTATTATTATTATTATTATTACGGTATGTCAAGT  
ATTATTTTTTTTTTTAAAAATAAAGAAAAAATTGTACAAATATATATATTTATATATTACTCTATATGGTT  
TTTTTTTTT

GAAAAAGAAAATATTCACCTCTAGGAGCCAAAAACATAAAAAAAAAAATAATTAAAAAAACTTTTATTGA  
ATGCTTAATTATTTAGTGACGCGATTACCTATATACCAGGTTATTTATTTTTCTTTTTTCAAAGGAAAAC  
AATACAAA

CTATCAAATTCGTTGGTTTTTTTTCTGGGAAAACCTCTATCAAAGTATAAGGTGCGCTTTTAAACGTAATTTA  
TAATGATTTTTTTAGAAATAATAATGTATATAGTATAAAAAATAAACAACTTTAAAAAAGAGTGAAGA  
ACTGTAAA

TTCCACATTAAGAAATATACCATAAAGGTTACTTAGACATCACTATGGCTATATATATATATATATATATA  
TATATATATATATGTAACCTTAGCACCATCGCGCGTGCATCACTGCATGTGTTAACCGAAAAGTTTGGCGAA  
CACTTAC

AGAAATATACCATAAAGGTTACTTAGACATCACTATGGCTATATATATATATATATATATATATATATATA  
TATGTAACCTTAGCACCATCGCGCGTGCATCACTGCATGTGTTAACCGAAAAGTTTGGCGAACACTTCACCG  
ACACGGTC

AATACATCAAACCTTCATTTGCGCGATGTTACGCGTCGCGTTTCTATAAAAAATACATAAGCTAGTGAA  
TAAAAGCTTTAAACGCGTTAGGGGATCTGCAATTAAGTAAATAAATGAAATAAATGAAATAGATGAAA  
ACTGGTTA

CCAAAATAAAATTTTTTTTTTAAGTCCCAATTGAAATACTTCTCCTTATAAATATCATGAAAGGAAGAAAA  
AAAGTGAIAAAAAAAAAAAAAAAAAACCAATAAAAAAAAAATAAAAAAAAAATCAATTCTACGAGAAATGCGTGCGAAA  
TCGATGAG

AGAGGTCTCCGGTTCGATTCCGGACTCGTCCATTTTAAAATTTCTTTTTTTTTTTTTCTCTTTCCGTATGT  
AAGCTTTTTTCTTTTTTTTTTTTTTTTTTTTTTTTTTTTTTTTTCTTCACTACTTTTTCAATGAAACTCTCTTCAA  
AAGACAGC

CGGACTCGTCCATTTTAAAATTTCTTTTTTTTTTTTTCTCTTTCCGTATGTAAGCTTTTTTCTTTTTTTTT  
TTTTTTTTTTTTTTTTTTTTTTTTTTTTTTTTCTTCACTACTTTTTCAATGAAACTCTCTTCAAAGACAGCATGCAGTAAAG  
CGCCGATA

AACCTTCATTTGCGCGATGTTACGCGTTCGCGTTTCTATAAAAAATACATAAGCTAGTGAATAAAAGCTTT  
AAACGCGTTAGGGGATCTGCAATTAAGTAAATAAATGAAATAAATGAAATAGATGAAAACTGGTTACA  
CTAATTAT

GTAATTTATTATTAATAATTATATTTTTATCAATATTTATACGATATAAAAAATTTAAAAAAATTATAATATA  
GAAATAATAATAATAATAATATGATAATAAAATAATATATAAATAAAAAATGATAAGATTATATTAATTTA  
TTTAATTT

GTAATATTTATAAAATATAAAAAAGAAGAAATTTTTATTCTTTTTATATTTTTATTATAAAATAGTTCAATTA  
TTTATATTATTTAAATGTTGTAATTTATTATTAATAATTATATTTTTATCAATATTTATACGATATAAAAAAT  
TTAAAAAA

CAACAACAAAAATCCAAAAAAAAAAGTAAAAAAAAACAAACTTTGATTGTTTTTTAATGATGTTAATGAT  
TTTTTTTTTCTTTCTTTATCATAAAAAAAAAAGTTAAAATGAAAAACAAATATGGGTCTGGAAGGCCATTAT  
TTTTTTTTT

AGGAAGAAAAAAAAAGTGAIAAAAAAAAAAAAAAAAAACCAATAAAAAAAAAATAAAAAAAAAATCAATTCTACGAGAAA  
TGCGTGCGAAATCGATGAGTTTTGTTTTGCCTCTGAAAAATTTCTGGAAAAATTTTTCTTAGCGGAAAAAAGA  
AAAAAAG

CGATGTTAGCGCAAACAATAACGCGTACGATAATAAAACTTCAAATGCGCCAATTCTTTTTTTTTTTTTTTTT  
TTTTTTTTTTGATTTCTTTTCATATATCCGATTTAAACCGCCTAGGGAAGAGTAAAAACCCGAATTGTTCCG  
TCTATACT

GGTTCGATTCCGGACTCGTCCATTTTAAAATTTCTTTTTTTTTTTTTCTCTTTCCGTATGTAAGCTTTTTTT  
CCTTTTTTTTTTTTTTTTTTTTTTTTTTTTTTTTTCTTCACTACTTTTTCAATGAAACTCTCTTCAAAGACAGCAT  
GCAGTAAA

CGTTGGTTTTTTTTCTGGGAAACTCTATCAAAGTATAAGGTGCGCTTTTAAACGTAATTTATAATGATTTT  
TTAGAAATAATAATGTATATAGTATAAAAAAAAAATAAACAACTTTAAAAAAAAGAGTGAAGAACTGTAAAGC  
TCATTTCA

GCAACAATAACGCGTACGATAATAAAACTTCAAATGCGCCAATTCTTTTTTTTTTTTTTTTTTTTTTTTTTTG  
ATTTCTTTTCATATATCCGATTTAAACCGCCTAGGGAAGAGTAAAAACCCGAATTGTTCCGTCTATACTTG  
GTTGTATG

ATATTCACCTCTAGGAGCCAAAAACATAAAAAAAAAAATAATTAAAAAAAAAACTTTTATTGAATGCTTAATT  
ATTTAGTGACGCGATTACCTATATACCAGGTTATTTATTTTTTTCTTTTTTCAAAGGAAAACAATACAAAAT  
ATTACTGT

TGCGCGATGTTACGCGTTCGCGTTTCTATAAAAAATACATAAGCTAGTGAATAAAAGCTTTAAACGCGTTA  
GGGGGATCTGCAATTAAGTAAATAAATGAAATAAATGAAATAGATGAAAACTGGTTACACTAATTATAA  
CGTTAATA

CGCTTTTCATCGATGTATATAAGGAAGAATACCTCATTATAATACATCAAAACCTTCATTTGCGCGATGTT  
ACGCGTCGCGTTTCTATAAAAAATACATAAGCTAGTGAATAAAAGCTTTAAACGCGTTAGGGGGATCTGC  
AATTAAG

TTATTATTATTATTATTACGGTATGTCAAGTATTATTTTTTTTTTAAAAATAAAGAAAAAATTGTACAAA  
TATATATATTTATATATTACTCTATATGGTTTTTTTTTTTTTAAAGTGCAGGCGTTGGTTATGCTTCGTCTAC  
AATTGGTT

CTCAGTCAGCTGATGCGATGCGATGTTAGCGCAAACAATAACGCGTACGATAATAAACTTCAAATGCGCC  
AATTCTTTTTTTTTTTTTTTTTTTTTTTTTTTGATTTCTTTTCATATATCCGATTTAAACCGCCTAGGGAAGAG  
TAAAAACC

TTCCCCTCTGGTTAACAAAAACCAGTATATTAACAGAAATAAATAATAATAACAAAAAATATGAATATAA  
GAATAAATTGCAATAAATAGTAATATTTATAAAATATAAAAAAGAAGAAATTTTTATTCTTTTTATATTTTA  
TTATAAAA

TTTAAATGTTGTAATTTATTATTAATAATTATATTTTTATCAATATTTATACGATATAAAAAATTTAAAAAAA  
TTATAATATAGAAATAATAAATAATAATAATATGATAATAAATAATATATAAATAAAAAATGATAAGATTA  
TATTAATT

TAAATATAAAAAAGAAGAAATTTTTATTCTTTTTATATTTTTATTATAAAATAGTTCAATTATTTATATTAT  
TTAAATGTTGTAATTTATTATTAATAATTATATTTTTATCAATATTTATACGATATAAAAAATTTAAAAAAT  
TATAATAT

CTAGGAGCCAAAAACATAAAAAAAAAAATAATTAAAAAAACTTTTTATTGAATGCTTAATTATTTAGTGAC  
GCGATTACCTATATACCAGGTTATTTATTTTTCTTTTTTCAAAGGAAAACAATACAAAATATTACTGTTA  
CCATTTTT

CATTTTAAAATTTCTTTTTTTTTTTTTCTCTTTCCGTATGTAAGCTTTTTCTTTTTTTTTTTTTTTTTTT  
TTTTTTTTTTCTTCACTACTTTTCAATGAAACTCTCTTCAAAGACAGCATGCAGTAAAAGCGCCGATATG  
AGTGACGA

ATTAATAATTATATTTTTATCAATATTTATACGATATAAAAAATTTAAAAAATTATAATATAGAAATAATAA  
ATAATAAATATGATAATAAATAATATATAAATAAAAAATGATAAGATTATATTAATTTATTTAATTTTC  
AAATTATT

TGTATAGACACCACATTGAAGGGCGTCACAGCAATTTTTTTTTATTTTTTTTTGATACTCAATAATTACGA  
GCATATAATTTAGTACTTCCAAAAAAAGTTAAAAAAAATAGTGACAAAATGTGTGAGTAAAATATAT  
ATGAGAAC

ATTTTTTTTTAAGTCCCAATTGAAATACTTCTCCTTATAAATATCATGAAAGGAAGAAAAAAGTGAAAA  
AAAAAAAAAAAAACCAATAAAAAAATAAAAAATATCAATTCTACGAGAAATGCGTGCGAAATCGATGAGTT  
TTGTTTTG

TTTTTATTCTTTTTATATTTTTATTATAAAATAGTTCAATTATTTATATTATTTAAATGTTGTAATTTATTA  
TTAATAATTATATTTTATCAATATTTATACGATATAAAAAATTTAAAAAATTATAATATAGAAATAATAAA  
TAATAATA

CGATGTATATAAGGAAGAATACCTCATTATAATACATCAAAACCTTCATTTGCGCGATGTTACGCGTCGCG  
TTTCTATAAAAAATACATAAGCTAGTGAATAAAAGCTTTAAACGCGTTAGGGGGATCTGCAATTAAAGTA  
AATAAATG

AAAACATTAACCAAAATAAAATTTTTTTTTAAGTCCCAATTGAAATACTTCTCCTTATAAATATCATGAAA  
GGAAGAAAAAAGTGAAAAAATAAAAAAATCAATTTCTACGAGAAAT  
GCGTGCGA

ATATTTTATCAATATTTATACGATATAAAAAATTTAAAAAAATTATAATATAGAAATAATAAATAATAATAA  
TATGATAATAAAATAATATATAAAATAAAAAATGATAAGATTATATTAATTTATTTAATTTTCAAATTATTAA  
ATAAATAA

GCTTGGGTAAATGTTCTTGTGCTATTGTTGCTGTTGTTATTGTTTTTATTATTGTATTATTGTATTATTAT  
TATATTATTATTATTATTATTATTATTATTATTATTACGGTATGTCAAGTATTATTTTTTTTTTAAAAATA  
AAGAAAAA

CGGCACGAAGGTTGAAATACCTATACTAATTGTTTGTCTTTTGTATATATCCGAACGTATCTAT  
CTGAAATTTTCAAATTTATAAAAAATAATATATATAAAAGGAAAAAAAAAAAAATCGATGCCCTACTAAT  
AGAGATTG

TATTTGTCAAGTCAAGGACCATCATTGTTTAAAAAAGAGAGGATATTACTAGTAGGTAATAACAGCTATG  
TCGCGTTATATATATTATATATAAAAAATTTAAAAATAGAAAATAAAATTTCAAATGCCCTCTGTGGGAATT  
GAACCCAC

TTCCCTTGGCACCATGTATATTTCACTTTTTATTGTCTCTTGATCGAGCTATAACCAAATTTTTTTTTTTTT  
TTTTTTTTTCGTTTTTATAATTTTTTCTTTGGTATTCAATTGTATATAGTGCTCAAACAGCAACGTACATA  
ATAGCTAG

CTGTTGTTATTGTTTTTATTATTGTATTATTGTATTATTATTATATTATTATTATTATTATTATTATTATT  
ATTATTACGGTATGTCAAGTATTATTTTTTTTTTAAAAATAAAGAAAAAAAAATTGTACAAATATATATATT  
ATATATTA

GCTATTGTTGCTGTTGTTATTGTTTTTATTATTGTATTATTGTATTATTATTATATTATTATTATTATTAT  
TATTATTATTATTATTACGGTATGTCAAGTATTATTTTTTTTTTAAAAATAAAGAAAAAAAAATTGTACAAAT  
ATATATAT

ACCATGTATATTTCACTTTTTATTGTCTCTTGATCGAGCTATAACCAAATTTTTTTTTTTTTTTTTTTTTT  
GTTTTTATAATTTTTTCTTTGGTATTCAATTGTATATAGTGCTCAAACAGCAACGTACATAATAGCTAGCA  
ACAATAG

AGTCTTGGTACTATCAAATTCGTTGGTTTTTTTTCTGGGAAACTCTATCAAAGTATAAGGTGCGCTTTTA  
ACGTAATTTATAATGATTTTTTAGAAATAATAATGTATATAGTATAAAAAATAAACAACTTTAAAAAAA  
AGAGTGAA

CGATATAAAAAATTTAAAAAAATTATAATATAGAAATAATAAATAATAATAATATGATAATAAATAATATA  
TAAATAAAAAATGATAAGATTATATTAATTTATTTAATTTTCAAATTATTAATAAATAATAACCTAATACT  
TACTTTTT

ATCATTGTTTAAAAAAGAGAGGATATTACTAGTAGGTAATAACAGCTATGTCGCGTTATATATATTATAT  
ATAAAAAATTAAAAAATAGAAAATAAAATTTCAAATGCCCTCTGTGGGAATTGAACCCACGATCCCCGCATT  
ACGAGTGC

CTTTTTCTTATTCCCCTCTGGTTAACAAAAACCAGTATATTAACAGAAATAAATAATAAATAACAAAAAAT  
ATGAATATAAGAATAAATTGCAATAAATAGTAATATTTATAAAATATAAAAAAGAAGAAATTTTTATTCTTT  
TTATATTT

AAGTAGTAAACCATTGAATGAAAACATTAACCAAATAAAATTTTTTTTTTAAGTCCCAATTGAAATACTTC  
TCCTTATAAATATCATGAAAGGAAGAAAAAAGTAAAAAAAAAAAAAAAAACCAATAAAAAATAAAAAA  
ATATCAAT

CATCTTTTTCGCGCGAAAAACAATATGATGCCTTTTTGAAACATGTTATTATTTGATTTTTTAAATGGCTTC  
TATTACGCGTCGTGGTTGGTGAACCTGGTACAAAATAAATAAAAAATACCTGCTAAAAAATATCAAATAA  
AGTAAGGA

GACTCAGTCACTCAGTCACTGATGCGATGCGATGTTAGCGCAAACAATAACGCGTACGATAATAAACTT  
CAAATGCGCCAATTCTTTTTTTTTTTTTTTTTTTTTTTTTTTTTTTTTGATTTCTTTTCATATATCCGATTTAAACCGCC  
TAGGGAAG

TAGTTCAATTATTTATATTATTTAAATGTTGTAATTTATTATTAATAATTATATTTTTATCAATATTTATAC  
GATATAAAAATTTAAAAAATTATAATATAGAAATAATAAATAATAATAATATGATAATAAATAATATAT  
AAATAAAA

AGTATATAGCTGCGAAGAAAGAAAAAGAAATATTTACCTCTAGGAGCCAAAAACATAAAAAAAAAAATAA  
TTAAAAAAACTTTTTATTGAATGCTTAATTATTTAGTGACGCGATTACCTATATACCAGGTTATTTATTTT  
TTCTTTTT

AAGGAAGAATACCTCATTATAATACATCAAAACCTTCATTTGCGCGATGTTACGCGTCGCGTTTCCTATAA  
AAAATACATAAGCTAGTGAATAAAAGCTTTAAACGCGTTAGGGGGATCTGCAATTAAGTAAATAAATGAA  
ATAAATGA

GCATTTTTCTGTCCACCACTGTACGCCATTGTACACAAAAGTATTTTTTTATATTTTTTTTACAATTTTT  
TATAATTTTTTTTTTATGTTTAGTGTATATTTGCTAGAAAGAAACAAGATCTTTTTTTGGTAGTGAAATGCT  
TAAACTTT

TTTTCTGGGAAACTCTATCAAAGTATAAGGTGCGCTTTTAAACGTAATTTATAATGATTTTTTTAGAAATAA  
TAATGTATATAGTATAAAAAAATAAACAACTTTAAAAAAAAGAGTGAAGAACTGTAAAGCTCATTTTATA  
GGTTTCAA

ATGTTCTTGTGCTATTGTTGCTGTTGTTATTGTTTTTATTATTGTATTATTGTATTATTATTATATTATTA  
TTATTATTATTATTATTATTATTATTACGGTATGTCAAGTATTATTTTTTTTTTTAAAAATAAAGAAAAAAA  
TTGTACAA

ACCTCATTATAATACATCAAAACCTTCATTTGCGCGATGTTACGCGTCGCGTTTCCTATAAAAAATACATA  
AGCTAGTGAATAAAAGCTTTAAACGCGTTAGGGGGATCTGCAATTAAGTAAATAAATGAAATAAATGAAA  
TAGATGAA

GAAATTCTGGCATTTTTTCTGTCCACCACTGTACGCCATTGTACACAAAAGTATTTTTTTATATTTTTTTT  
TACAATTTTTTTATAATTTTTTTTTTATGTTTAGTGTATATTTGCTAGAAAGAAACAAGATCTTTTTTTGGTAG  
TGTAATG

CCTATACTAATTGTTTGTCTTTTTGTATATATCCGAACGTATCTATCTGAAATTTTTCAAATTTAT  
AAAAATAATATATATAAAAGGAAAAAAAAAAAAATCGATGCCCTACTAATAGAGATTGGAGCTGAAAAGA  
AAAAGTGT

ATTTATATTATTTAAATGTTGTAATTTATTATTAATAATTATATTTTTATCAATATTTATACGATATAAAAA  
TTTTAAAAAATTATAATATAGAAATAATAAATAATAATAATATGATAATAAATAATATATAAATAAAAAAT  
GATAAGAT

TTGGGAGATCTTGCCGACGGCTACGTATATATATATATATATATAAATATATATATATATATATTCATGTATA  
CTGTATATGTACAATCATATATAAAGTTACTCTTCCCTTTTCTTTTTTTTTTTTACATTATTACGTATATAC  
TGCTTTAT

TTGTTTGTCTTTTGTCTTTTTGTATATATCCGAACGTATCTATCTGAAATTTTTCAAATTTATAAAAAATAAT  
ATATATAAAAGGAAAAAAAAAAAAATCGATGCCCTACTAATAGAGATTGGAGCTGAAAAGAAAAAGTGTAC  
ATCAAACG

AAAACATAAAAAAAAAAATAATTAAAAAAACTTTTTATTGAATGCTTAATTATTTAGTGACGCGATTACCT  
ATATACCAGGTTATTTATTTTTTCTTTTTTCAAAGGAAAACAATACAAAATATTACTGTTACCATTTTTGT  
TACTATTA

TCGTTTTTCCACAATACAAAAAACACAGTCCTTTGTACTATCCCTTTTATTTTCATTATTTTTTCTTTTTT  
AAGATACTACTAGATATTATCATATATAGCATATTATATAACATAAAAAAGTCAAGAAAAAAATGTTTTTA  
TCACTTTC

GCTAAAATGAAAGTAGTAAACCATTGAATGAAAACATTAACCAAAATAAAATTTTTTTTTTAAGTCCCAATT  
GAAATACTTCTCCTTATAAATATCATGAAAGGAAGAAAAAAGTGAAAAAATAAAACCAATAAAA  
AAATAAAA

GTATGTCAAGTATTATTTTTTTTTTAAAAATAAAGAAAAAATTGTACAAATATATATATTTATATATTAC  
TCTATATGGTTTTTTTTTTTTTAAGTGCAGGCGTTGGTTATGCTTCGTCTACAATTGGTTGGTGTGCACCGA  
TGGGTCAT

ATAGGCGCGCGGGTGTGATGGTGTGATAATGATGATGATGATGATAATGATGAATAAACGTTTCGGTTTT  
ACGAGTTTCTTTAAATATACATATATGATATAAAAAAATAACGTACCCTTACAATTTGCAAATATAG  
ATGATCGA

GAAAAAGAGAGGATATTACTAGTAGGTAATAACAGCTATGTCGCGTTATATATATTATATATAAAAAATTA  
AAAAATAGAAAATAAAATTTCAAATGCCCTCTGTGGGAATTGAACCCACGATCCCCGCATTACGAGTGCGA  
TGCCTTAC

CTGTTTGACATGCTAGGACTTTCCCTTGGCACCATGTATATTCACTTTTATTGTCTCTTGATCGAGCTATA  
ACCAAATTTTTTTTTTTTTTTTTTTTTTTCGTTTTTATAATTTTTTCTTTGGTATTCAATTGTATATAGTG  
CTCAAACA

AAAAGACTCTCGGCACGAAGGTTGAAATACCCTATACTAATTGTTTGCTTTGTCTTTTTGTATATATCCGA  
ACGTATCTATCTGAAATTTTTCAAATTTATAAAAAATAATATATATAAAAGGAAAAAATAATCGATG  
CCCTACTA

AAGCCAAGGGGACTCAGTCACTCAGTCAGCTGATGCGATGCGATGTTAGCGCAAACAATAACGCGTACGAT  
AATAAACTTCAAATGCGCCAATTCTTTTTTTTTTTTTTTTTTTTTTTTGGATTTCTTTTCATATATCCGAT  
TTAAACCG

ATATCATGAAAGGAAGAAAAAAGTGAAAAAATAAAACCAATAAAAAATAAAAAATATCAATT  
CTACGAGAAATGCGTGCGAAATCGATGAGTTTTGTTTTGCCTCTGAAAATTCTGAAAATTTTTCTTAGC  
GGAAAAA

TTGTCTCTTGATCGAGCTATAACCAAATTTTTTTTTTTTTTTTTTTTTTTCGTTTTTATAATTTTTTCTTT  
GGTATTCAATTGTATATAGTGCTCAAACAGCAACGTACATAATAGCTAGCAAACAATAGATGAAATAATAG  
AATAATAA

GCAGCTCTTCTTTTTTTCATGCTCGAGGTTTTTAAGGGCGAACTTTAACTAGATGGATTATTCAGTTTTTT  
TTAAAAGGATCAAAATCCTACATTATATATATATATATATATATATGTTTGTGTGTATATAAAAAA  
ATCATTTC

CTTTTTATGCTGCTATTGTGGAGGAACCGTCATCTTTTCGCGCGAAAAACAATATGATGCCTTTTTTGAAA  
CATGTTATTATTTGATTTTTTAATGGCTTCTATTACGCGTCTGGTTGGTGAACCTGGTACAAAATAAATA  
AAAAATA

GGAAAAACAAAAATGATTAAATAGGCGCGCGGGTGTGATGGTGTGATAATGATGATGATGATGATAATG  
ATGAATAAACGTTTCGGTTTACGAGTTTCTTTAAATATACATATATGATATAAAAAAATAACGTACCA  
CTTACAAT

TATTATTTTTTTTTTAAAAATAAAGAAAAAATTGTACAAATATATATATTTATATATTACTCTATATGGT  
TTTTTTTTTTTTAAGTGCAGGCGTTGGTTATGCTTCGTCTACAATTGGTTGGTGTGCACCGATGGGTCTGTT  
TGGACCTT



TTAAAAAATAAAAAAATAAAAAAATGAACGCCGCCCCAGAGGGAAGAACAAGCTATTTATTTTCTTTTTT  
ACTTTATCTTTTCATGGTCATATATATATATATATATATATATATATATATCTTCTATAGGCTACTATACATGA  
AGGCGTTC

TTCACTTTTATTGTCTCTTGATCGAGCTATAACCAAATTTTTTTTTTTTTTTTTTTTTTTTTTTTCGTTTTTATAA  
TTTTTTCTTTGGTATTCAATTGTATATAGTGCTCAAACAGCAACGTACATAATAGCTAGCAAACAATAGAT  
GAAATAAT

TGCTAGGACTTTCCCTTGGCACCATGTATATTCACCTTTTATTGTCTCTTGATCGAGCTATAACCAAATTTT  
TTTTTTTTTTTTTTTTTTTTCGTTTTTATAATTTTTTCTTTGGTATTCAATTGTATATAGTGCTCAAACAGC  
AACGTACA

CCATTGAATGAAAACATTAACCAAATAAAAATTTTTTTTTTAAGTCCCAATTGAAATACTTCTCCTTATAAA  
TATCATGAAAGGAAGAAAAAAGTGAAGAAAAAACAATAAAAAAATAAAAAATATCAATTC  
TACGAGAA

AAATGATTAATAGGCGCGCGGGTGTGATGGTGTGATAATGATGATGATGATAATGATGAATAAAC  
GTTTCGGTTTACGAGTTTCTTTAAATATACATATATGATATAAAAAAATAACGTACCACCTTACAATTT  
GCAAATAT

AAAAAATAAAAAAATGAACGCCGCCCCAGAGGGAAGAACAAGCTATTTATTTTCTTTTTTACTTTTATCTT  
TCATGGTCATATATATATATATATATATATATATATATCTTCTATAGGCTACTATACATGAAGGCGTTTCG  
CCTTACAA

AATATTTATACGATATAAAAAATTTAAAAAATTATAATATAGAAATAATAAATAATAATAATATGATAATA  
AAATAATATATAAATAAAAAATGATAAGATTATATTAATTTATTTAATTTTCAAATTATTAATAAATAATA  
ACCTAATA

TATTATTACGGTATGTCAAGTATTATTTTTTTTTTAAAAATAAAGAAAAAATTGTACAAATATATATATT  
TATATATTACTCTATATGGTTTTTTTTTTTTTAAAGTGCAGGCGTTGGTTATGCTTCGTCTACAATTGGTTGG  
TGTGCACC

GAAAGGAACATATTTGTCAAGTCAAGGACCATCATTGTTTGAAGAAAGAGAGGATATTACTAGTAGGTAAT  
AACAGCTATGTGCGTTATATATATTATATATAAAAAATTAAGAAATAAATAAATTTCAAATGCCCTC  
TGTGGGAA

TGTCTTTTTGTATATATCCGAACGTATCTATCTGAAATTTTTCAAATTTATAAAAAATAATATATATAAAA  
GGAAAAAATAAATCGATGCCCTACTAATAGAGATTGGAGCTGAAAAGAAAAAGTGTACATCAAACGCT  
ATATCTCG

CTCCTTATAAATATCATGAAAGGAAGAAAAAAGTGAAGAAAAAACAATAAAAAAATAAAAA  
AATATCAATTTCTACGAGAAATGCGTGCGAAATCGATGAGTTTTGTTTTGCCTCTGAAAAATTCTGGAAAA  
TTTTCTTA

CAAGAAAAAATTGAGGGATGGGTCAACCTTCCATAGATTCTATATGGAATAATAAATTTACTTCTTACTA  
ACATTATATCAGGGTGAATATTACTGACAAAAATAAATACTTAAGTCTTCTTTATAATATGATGATCGACG  
CGCGGGGT

GCTTAGGCGTCTTTTTCTTCAACAACAAAAATTCAAAAAAGTAAAAAACAAAACTTTGATTGT  
TTTTTAATGATGTTAATGATTTTTTTTTTCTTTCTTTATCATAAAAAAAGTTAAATGAAAAACAATA  
TGGGTCTG

AAAGAAGAAATTTTTATTCTTTTTATATTTTATTATAAATAGTTCAATTATTTATATTATTTAAATGTTG  
TAATTTATTATTAATAATTATATTTTATCAATATTTATACGATATAAAAAATTTAAAAAATTATAATATAG  
AAATAATA

AAAAAAGTAAAAAACAAAACCTTGGATTGTTTTTAAATGATGTTAATGATTTTTTTTTCTTCTTTATC  
ATAAAAAAAAGTTAAAATGAAAAACAATATGGGTCTGGAAGGCCATTATTTTTTTTTTATTATATACC  
GTTTCTGG

ATTGCTAGTTGCTTGGGTTAATGTTCTTGTGCTATTGTTGCTGTTGTTATTGTTTTTATTATTGTATTATT  
GTATTATTATTATATTATTATTATTATTATTATTATTATTATTATTACGGTATGTCAAGTATTATTTTTTT  
TTTTAAAA

TATAACATTGTCATAGTCTCATGCATGGTAAATAGGGTGAACGAAAAAAATTGGGAGATCTTGCCGACGGC  
TACGTATATATATATATATATAAATATATATATATATATTTCATGTATACTGTATATGTACAATCATATA  
TAAAGTTA

TCAAATGCGCCAATTCTTTTTTTTTTTTTTTTTTTTTTTTTGATTTCTTTTCATATATCCGATTTAAACCGC  
CTAGGGAAGAGTAAAAACCCGAATTGTTCCGTCTATACTTGGTTGTATGGGTGTTTTTTCTTCGATGCTTT  
TCGTATAA

TTTCTTCAAGAAAAGACGAAGCTTGTGTGTGGGTGCGCGCTAGTATCTTTCCACATTAAGAAATATACC  
ATAAAGGTTACTTAGACATCACTATGGCTATATATATATATATATATATATATATATATATATATATATGTAACCTA  
GCACCATC

TTGTTAAAAAGCTAAAATGAAAGTAGTAAACCATTGAATGAAAACATTAACCAAAAATAAAATTTTTTTTTTA  
AGTCCCAATTGAAATACTTCTCCTTATAAATATCATGAAAGGAAGAAAAAAAGTGAAAAAAGAAAAAA  
ACCAATAA

ATGCTGTCAACGCTTTTTCATCGATGTATATAAGGAAGAATACCTCATTATAATACATCAAAACCTTCATTT  
GCGCGATGTTACGCGTCGCGTTTCTATAAAAAATACATAAGCTAGTGAATAAAAGCTTTAAACGCGTTAG  
GGGATCT

CACTAAAAAGAAAGTGGTTCCACCAGTATGCGTCGGAAACGTCATATAAATCTATATATGTATATGTACATA  
TATATATATATATATATATATATTAGTGAGTATTTTAAATGTATATCAAGTTTTTGATAAAGATTGCAACTTGGC  
TTGAAATA

ATATATACATTCTACTAGCTTTTTTTTTCTTCAATTCGATAGTTTAGATGGGTTTATATCTAAATATATAT  
ATATAGTATTTTATTTTATTTTCAATCTCCTAGTATACATGAAATATTTAACGCTTTTTTTTTGCCCTTGTT  
TTTTTTTT

GATGATTCAGAAAATTCTGGCATTTTTTCTGTCCACCCTGTACGCCATTGTACACAAAAGTATTTTTTTT  
ATATTTTTTTTACAATTTTTTATAATTTTTTTTTTATGTTTGTAGTATATTTGCTAGAAAGAAACAAGATCT  
TTTTTGTT

CCACATTGAAGGGCGTCACAGCAATTTTTTTTTTTTTTTTTTTTTGATACTCAATAATTACGAGCATATAAAT  
TTAGTACTTCCAAAAAAAGTTAAAAAATAATAGTGACAAAATGTGTGTCAGTAAAATATATATGAGAACAT  
GGAATGTA

TAAGCTCTGCTGTGCTCTTCTCGTTAAGGAAAAAATGCGATGGTATATATATAGATATATATATATATATA  
TGTATCTGTATATATATGTTTACATATATATATATATCTATTATTGTTGTTATTATTATCGTGATTATTAT  
TTAGGTCC

ACAATACAAAAAACACAGTCCTTTGTACTATCCCTTTTTATTTTCATTATTTTTTTCTTTTTTAAGATACCAC  
TAGATATTATCATATATAGCATATTATATAACATAAAAAAGTCAAGAAAAAAATGTTTTTATCACTTTCTA  
TAACTGCA

AGTCACCAGGTGTATAGACACCACATTGAAGGGCGTCACAGCAATTTTTTTTTTTTTTTTTTTGATACTCA  
ATAATTACGAGCATATAATTTTACTTCCAAAAAAAGTTAAAAAATAATAGTGACAAAATGTGTGTCAG  
TAAAATAT

TGTCCACCACTGTACGCCATTGTACACAAAAGTATTTTTTTATATTTTTTTTACAATTTTTTATAATTTTT  
TTTTATGTTTAGTGTATATTTGCTAGAAAAGAAACAAGATCTTTTTTGGTAGTGAAATGCTTAACTTTGT  
CTCTTTTT

ATCGAGCTATAACCAAATTTTTTTTTTTTTTTTTTTTTTTTCGTTTTTATAATTTTTTCTTTGGTATTCAAT  
TGTATATAGTGTCTCAAACAGCAACGTACATAATAGCTAGCAAACAATAGATGAAATAATAGAATAATAACA  
AATAACTA

TTGAGGGATGGGTCAACCTTCCATAGATTCTATATGGAATAATAAAATTTACTTCTTACTAACATTATATC  
AGGGTGAATATTACTGACAAAAATAATAACTTAAAGTCTTCTTTATAATATGATGATCGACGCGGGGTAA  
CGCGCTCT

ATTTAAAAAATTATAATATAGAAATAATAAATAATAAATAATATGATAATAAAATAATATATAAAATAAAAA  
TGATAAGATTATATTAATTTATTTAATTTTCAAATTATTAATAAATAATAACCTAATACTTACTTTTCTT  
AATATTAT

ATCCCTTTTATTTTATTATTTTTTTCTTTTTTAAGATACCACTAGATATTATCATATATAGCATATTATATA  
ACATAAAAAGTCAAGAAAAAAATGTTTTTATCACTTTCTATAACTGCATATCTTTTTTTGCATTTTGAAT  
GATTGCTT

ATAAAATGCTTTCACGAACACCGTCATTGATCAAATAGGTTTATAATATTAATATACATTTATATAATCTAC  
GGTATTTATATCATCAAAAAAAGTAGTTTTTTTTATTTTTATTTTGTTCGTTAATTTTCAATGTCTATGGA  
AACCGTT

TCATAGTCTCATGCATGGTAAATAGGGTGAACGAAAAAATTTGGGAGATCTTGCCGACGGCTACGTATATA  
TATATATATATAAATATATATATATATATATTTTATGTATACTGTATATGTACAATCATATATAAAGTTACT  
CTTCCCTT

TTTTTTTCATGCTCGAGGTTTTTAAGGGCGAACTTTAACTAGATGGATTATTCAGTTTTTTTTAAAAGGAT  
CAAAATCCTACATTATATATATATATATATATATATGTTTGTGTGTATATAAAAAAAATCATTTCTT  
GATCAAGA

CCTTTTCTTCAACAACAAAAATTCAAAAAAGTAAAAAACAAACTTTGATTGTTTTTTAATGA  
TGTTAATGATTTTTTTTTCTTTCTTTATCATAAAAAAAGTTAAATGAAAAACAATATGGGTCTGGA  
AGGCCATT

TAATGCATTAGAACGTTACCTGGTCATTTGGATGGAGATCTAAGTAACACTTACTATCTCCTATGGTACTA  
TCCTTTACCAAAAAAAAAAAAAAAAAAAAAAAAAAATCAGCAAAGTGAAGTACCCTCTTGATGTATA  
AATACATT

TAATAAACTTCAAATGCGCCAATTCTTTTTTTTTTTTTTTTTTTTTTTGATTTCTTTTATATATCCGA  
TTTAAACCGCCTAGGGAAGAGTAAAACCCGAATTGTTCCGTCTATACTTGGTTGTATGGGTGTTTTTTCT  
TCGATGCT

CACTCCGAAAAAATTTATAATAGATGTGGGGAAATCACCTTTGACGATGTGCAACGGGAGAACTATTTTT  
TTTTTTCTTTTTTTCTTTTTTTTTTTTTTTTTTTGGTCCGAACAATGCGATGAGCCAGACGAAGAAAAAATA  
AAAAATGA

AAAGAAAAAGGAAAGGAACATATTTGTGAGTGAAGGACCATCATTGTTTAAAAAAGAGAGGATATTACT  
AGTAGGTAATAACAGCTATGTCGCGTTATATATATATATATAAAAAATTAATAAATAGAAAATAAAATTTT  
AAATGCC

TTTCTTTTTTTTTTTTTCTCTTTCCGTATGTAAGCTTTTTTCTTTTTTTTTTTTTTTTTTTTTTTTTTTT  
CTTCACTACTTTTCAATGAAACTCTTCAAAGACAGCATGCAGTAAAAGCGCCGATATGAGTGACGACG  
ATTATATG

TTTCCAATGTATGCTGTCAACGCTTTTCATCGATGTATATAAGGAAGAATACCTCATTATAATACATCAAA  
ACCTTCATTTGCGCGATGTTACGCGTCGCGTTTTCTATAAAAAATACATAAGCTAGTGAATAAAAGCTTTA  
AACGCGTT

TATTATAAAATAGTTCAATTATTTATATTATTTAAATGTTGTAATTTATTATTAATAATTATATTTTATCA  
ATATTTATACGATATAAAAAATTTAAAAAATTATAATATAGAAATAATAAATAATAATAATATGATAATAA  
AATAATAT

AATGATAGTATTCTTCGCTGCTTAGGCGTCCTTTTCCTTCAACAACAAAAATTCAAAAAAAAAAAAAGTAA  
AAAAACAAAACCTTTGATTGTTTTTTAATGATGTTAATGATTTTTTTTTCTTTCTTTATCATAAAAAAAA  
GTTAAAT

AAAAGTGAAAAAAAAAAAAAAAAACCAATAAAAAAATAAAAAATATCAATTCTACGAGAAATGCGTGCGAA  
ATCGATGAGTTTTGTTTTGCCTCTGAAAAATTCTGGAAAATTTTTCTTAGCGGAAAAAGAAAAAAGAA  
ACGTGATG

TGTTTTTATTATTGTATTATTGTATTATTATTATATTATTATTATTATTATTATTATTATTATTATTACGG  
TATGTCAAGTATTATTTTTTTTTTAAAAATAAAGAAAAAATTGTACAAATATATATATTTATATATTACT  
CTATATGG

TTGCCGACGGCTACGTATATATATATATATATAAATATATATATATATATATTCATGTATACTGTATATGT  
ACAATCATATATAAAGTTACTCTTCCCTTTCTTTTTTTTTTACATTATTACGTATATACTGCTTTATTA  
TCGGAAAG

TGATGAGTCGAAGCCAAGGGGACTCAGTCACTCAGTCAGCTGATGCGATGCGATGTTAGCGCAAACAATAA  
CGCGTACGATAATAAACTTCAAATGCGCCAATTCTTTTTTTTTTTTTTTTTTTTTTTGATTTCTTTTCA  
TATATCCG

CCTTTGTAATATCCCTTTTATTTTATTATTTTTCTTTTTTAAGATACCACTAGATATTATCATATATAGC  
ATATTATATAACATAAAAAAGTCAAGAAAAAATGTTTTTATCACTTTCTATAACTGCATATCTTTTTTTG  
CATTTTCA

AAAAAGAAAAAACCTGAAGTCTACTTCATGATTACCCATACTTACGCGTGGTTTAATTCTATGTAACG  
ATTAACGTCCATGTAATCATTATATATATATATATTGTAATAATCTCTCTAATTGAGTATCACAATCTGCT  
GCGTTAC

TTTTATATTTTATTATAAAATAGTTCAATTATTTATATTATTTAAATGTTGTAATTTATTATTAATAATTA  
TATTTTATCAATATTTATACGATATAAAAAATTTAAAAAATTATAATATAGAAATAATAAATAATAAAT  
ATGATAAT

AAAACACAGTCTTTTGTACTATCCCTTTTATTTTATTATTTTTCTTTTTTAAGATACCACTAGATATTAT  
CATATATAGCATATTATATAACATAAAAAAGTCAAGAAAAAATGTTTTTATCACTTTCTATAACTGCATA  
TCTTTTTT

CTTTTTTAAGCACTCCGGAAAACTTTATAATAGATGTGGGGAAATCACCTTTGACGATGTGCAACGGAGA  
AACTATTTTTTTTTCTTTTTTTCTTTTTTTTTTTTTTTTTTTGGTCCGAACAATGCGATGAGCCAGACGAA  
GAAAAAA

TACTTTGGCGAATCAACAAATTGAAGTTGCGCAATGTGCGATTGCTTATGTATCAAAAAAACTAAAAAA  
TGAATAGAGAAATCATATATATAAAAGAAAAAATATCGTACACCTCTTAGGTAACCTGGAATATATTTAA  
ACATGTAA

GCAATAAATAGTAATATTTATAAAATATAAAAAAGAAGAAATTTTTATTCTTTTTATATTTTATTATAAAAT  
AGTTCAATTATTTATATTATTTAAATGTTGTAATTTATTATTAATAATTATATTTTATCAATATTTATACG  
ATATAAAA

AAAAAAAAATAATTAAAAAAAAAACTTTTTATTGAATGCTTAATTATTTAGTGACGCGATTACCTATATACCAGG  
TTATTTATTTTTCTTTTTTCAAAGGAAAACAATACAAAATATTACTGTTACCATTTTTGTTACTATTATT  
ATTGTCTT

TTCTTCGCCTGCTTAGGCGTCCTTTTCCTTCAACAACAAAAATTCAAAAAAAAAAGTAAAAAACAAAA  
CTTTGATTGTTTTTAATGATGTTAATGATTTTTTTTTCTTTCTTTATCATAAAAAAAAAAGTTAAATGA  
AAAAAAA

AAAGGTCTGATATGTAGGGGAGGGCATATAATCATTTTAATATATATGTATATATTCTTACATATATATAT  
AATATCGCCGTAACCTTATAGCGTAAACTATATAAAATACGTCTTAGTCTATAAGCTATCACGGATAGCGTC  
TTGGACGT

TGAAATACTTCTCCTTATAAATATCATGAAAGGAAGAAAAAAGTGAAAAAAAAAAAAAAAAACCAATAAA  
AAAATAAAAAAATATCAATTCTACGAGAAATGCGTGCGAAATCGATGAGTTTTGTTTTGCCTCTGAAAAAT  
TCTGGAAA

GAACAAAATGTGCTTATCTGAGCTAATTTTTTTCATTTTTGTCTATAAATAATAATGGAAAAAAAAAAC  
TCATCGCGTGGTTGAACAGAAAAAACAATAAGAGTGAGTAAGCAGTGAAAAATGTAAGATTTACGCTTT  
ATATAAGC

GAGGAACCGTCATCTTTTCGCGCGAAAAACAATATGATGCCTTTTTTGAACATGTTATTATTTGATTTTT  
TAATGGCTTCTATTACGCGTCGTGGTTGGTGAACCTGGTACAAAATAAATAAAAAATACCTGCTAAAAAA  
TATCAAT

TTGAAAAGTAGTAATGGTTATTCAAAAAGTTAGCAGCGAGATCTTTTTTCTATCGCGCGTTAAAACGTTT  
GAACAGATATATATTATTAGCCACAACCTATCTATATATAATATTTCTTCGATTTTTCTGTTTTCTCAAGTT  
TCGTCTTA

GATTAGACATTTTTCAATTTTTGTCGTTGAGTTCCAATCCTTCCTTATTTATGGTTAAACAAGGAAAGAGGTG  
GAAGTTAAAAAATGGAATTAAAAAAAAAAAAAAAAAATCAAAAAAGAAAAATAAAAAATAGAAAAATTGGCA  
CGGAAATC

AACTTTAACTAGATGGATTATTCAGTTTTTTTTTAAAGGATCAAAATCCTACATTATATATATATATATAT  
ATATATGTTTGTGTGTATATAAAAAAATCATTCTTGATCAAGATCAGCCTCTTATATATGTGCGCA  
TCAATCTT

AGAAAGAAAATTGTTAAAAAGCTAAAATGAAAGTAGTAAACCATTGAATGAAAACATTAACCAAAATAAAA  
TTTTTTTTTAAAGTCCCAATTGAAATACTTCTCCTTATAAATATCATGAAAGGAAGAAAAAAGTGAAAAA  
AAAAAAA

ACTAATATTTAGTATATAGCTGCGAAGAAAAGAAAAAGAAAATATTCACCTCTAGGAGCCAAAAACATAAAA  
AAAAAATAATTAAAAAAACTTTTTATTGAATGCTTAATTATTTAGTGACGCGATTACCTATATACCAGGT  
TATTTATT

TCGTTAAGGAAAAAATGCGATGGTATATATATATATATATATATATATATATATATATATATATATGTT  
CATACATATATATATCTATTATTGTTGTTATTATTATCGTGATTATTATTTAGGTCCTCCCTTCTTTTT  
ACCTGTTT

CATAAAGGTTACTTAGACATCACTATGGCTATATATATATATATATATATATATATATATATATATATGTA  
AGCACCATCGCGCGTGCATCACTGCATGTGTTAACCAGAAAGTTTGGCGAACACTTCACCGACACGGTCAT  
TTAGATCT

AACATTCCTATTTTTATACGTTTCGAAATCATGAACATTTATTTTTATGATTATGTAATTAAAAAAATAAA  
TAAATTTATTTTGAATTAATTTTTTTTAAATTTTAAATATGTTTTATCATGTGACTTATGAAATGAT  
ATTTACGG

GTTACCTGTAAAGGTCTGATATGTAGGGGAGGGCATATAATCATTTTAATATATATGTATATATTCTTAC  
ATATATATATAATATCGCCGTAACCTTATAGCGTAAACTATATAAAATACGTCTTAGTCTATAAGCTATCAC  
GGATAGCG

TAAAAAAAAAAGTGATCTATAATGGGAAAGAAAAATCCAACTTCTTCAAAGAGTATATATATGTACAGG  
ATATTAATAATGTAATGATAGTAGTAATAATAGTATTAACATAAGCTAAGCGGATCTTGCTGTTTCCAAAGC  
TTTTCTTG

TGCTATTGTGGAGGAACCGTCATCTTTTCGCGCGAAAAACAATATGATGCCTTTTTGAAACATGTTATTA  
TTTGATTTTTTAATGGCTTCTATTACGCGTCGTGGTTGGTGAACCTGGTACAAAATAAATAAAAAAATACC  
TGCTAAAA

TCTCGAAGAAATGTCAATCCCTTTTTTAAGCACTCCGGAAAACTTTATAATAGATGTGGGGAAATCACCT  
TTGACGATGTGCAACGGAGAACTATTTTTTTTTTTCTTTTTTTCTTTTTTTTTTTTTTTTTTTGGTCCGAAC  
AATGCGAT

TTTTTTTTTTTTTTTTTTTTCGTTTTTATAATTTTTCTTTGGTATTCAATTGTATATAGTGCTCAAACAG  
CAACGTACATAATAGCTAGCAAACAATAGATGAAATAATAGAATAATAACAAATAACTATATAAGAGTGCC  
AGGAAAAA

AAAAAAAAAACTCATCGCGTGGTTGAACAGAAAAAAAACAATAAGAGTGAGTAAGCAGTGAAAAATGTAAG  
ATTTACGCTTTATATAAGCAGATTTTGGTTTCCTTTATATATTTTTGCATTTGTCTATCCTTAACATTGGA  
TAGCAATT

CCTTCTACTATAATGCATTAGAACGTTACCTGGTCATTTGGATGGAGATCTAAGTAACACTTACTATCTCC  
TATGGTACTATCCTTTACCAAAAAAAAAAAAAAAAAAAAAAAAAAAAAAAAAATCAGCAAAGTGAAGTACCCTC  
TTGATGTA

TTTAAGGGCGAACTTTAACTAGATGGATTATTCAGTTTTTTTTTAAAAGGATCAAAATCCTACATTATATAT  
ATATATATATATATATATGTTTGTGTGTATATAAAAAAAAAAATCATTCTTGATCAAGATCAGCCTCTTAT  
ATATGTCG

TTCCAATCCTTCCTTATTTATGGTTAACAAGGAAAGAGGTGGAAGTTAAAAAATGGAAATTAAAAAAAAA  
AAAAAATCAAAAAAGAAAAATAAAAAAGAAAAATTGGCACGGAAATCTACAGGATTTAGCACTAGTAGG  
GGGTTTAT

AAAAAATGAAAAATCAATGAATAAGAGGGCTTGAGTTCAGGTTCTAGAAATTTCCCTCACTTATATATA  
TATATATATCTATATACATATAGTTTTGAGTATATCATAACAGGATTCTCTTTCAATGAAACCTATGTTTT  
CCGCGGCA

GGTCAACCTTCCATAGATTCTATATGGAATAATAAAATTTACTTCTTACTAACATTATATCAGGGTGAATA  
TTACTGACAAAAATAATAACTTAAGTCTTCTTTATAATATGATGATCGACGCGCGGGGTAACGCGCTCTTC  
CCATCTTT

ATATGATAATAAAAATAATATATAAAATAAAAAATGATAAGATTATATTAATTTATTTAATTTTCAAATTATTA  
AATAAATAATAACCTAATACTTACTTTTCTAATATTATTAATAATGGTTATTGTCAAACCCATTAACCTGA  
TTATATTA

GGAAATCACCTTTGACGATGTGCAACGGAGAACTATTTTTTTTTTTCTTTTTTTCTTTTTTTTTTTTTTT  
TTGGTCCGAACAATGCGATGAGCCAGACGAAGAAAAAATAAAAAATGAGAATGAGTAATTATGTTAAGAC  
CTTTAGAA

AAGATGTTTTTAACTGATCTTAATTTATATGTAGAGGATATATGTAGTATATCTATTTTTTGCTGATTGACT  
TATCAATTAGCTTCATAATACAACATTGTTTTTGTTCGTTACTCGCGACTTTCTTCGCGGCAGAGCCG  
CGCTACAG

AAAGTGGTTCACCAGTATGCGTCGGAAACGTCATATAAATCTATATATGTATATGTACATATATATATATA  
TATATATATATTAGTGAGTATTTTAATGTATATCAAGTTTTGATAAAGATTGCAACTTGGCTTGAATAAA  
CGCATTTT

TTTTTACGTTTCGGAAATCATGAACATTTATTTTTATGATTATGTAATTAATAAATATAAATAAATTTATT  
TTGAAAATTAATTTTTTTTAAAATTTTAAATATGTTTTTATCATGTGACTTATGAAAATGATATTTACGGTT  
CAAGAGAA

TGTACACAAAAGTATTTTTTTTATATTTTTTTTACAATTTTTTTATAATTTTTTTTTTATGTTTAGTGTATATT  
TGCTAGAAAGAAACAAGATCTTTTTTGGTAGTGAAATGCTTAAACTTTGTCTCTTTTTCTTTTTACTTT  
GGAAAAAT

AACCAAATTTTTTTTTTTTTTTTTTTTTTTTTCGTTTTTATAATTTTTTCTTTGGTATTCAATTGTATATAGT  
GCTCAAACAGCAACGTACATAATAGCTAGCAAACAATAGATGAAATAATAGAATAATAACAAATAACTATA  
TAAGAGTG

TTCAATTAGTTCGTTTTTCCACAATACAAAAAACACAGTCCTTTGTACTATCCCTTTTTATTTTATTATTT  
TTTCTTTTTTAAAGATACCACTAGATATTATCATATATAGCATATTATATAACATAAAAAAGTCAAGAAAAAA  
AATGTTTT

CCGGATTATAAAGCCGATGTAGCAGAAAAACGGGTTTACGGAATACAATAGCCAAATAACAATAAATAAAT  
AAATAAATAAATAAGAAAAAAGCAAGTAAATAAAACAAAACGGGATGCAACAAGCCAAGGAGGGAA  
ACAATAGA

GCATTGTTGCTTGCAATTAAGTGTAGGTGTTTTCCCTATCCACTTAGCTATGAACAAAATGTGCTTATCTGA  
GCTAATATTTTTTCATTTTTGTCTATAAATAATAATGGAAAAAATACTCATCGCGTGGTTGAACAGAA  
AAAAACA

TTTCAAAGAAAAAGAAAAAACCCCTGAAGTCTACTTCATGATTACCCATACTTACGCGTGGTTTAATT  
CTATGTAACGATTAACGTCCATGTAATCATTATATATATATATATTGTAATAATCTCTCTAATTGAGTATC  
ACAATCTG

GCTTGCAATCCCTTTTTTACTTTCAATTCTCCGTTAGGTTATTTATTCTACTACACGCAGTTTTTTTTTTT  
CAATGGGTTATATATCTCTAATATATACACATTTATATGTTTAGACTTATACAGAAGCAAAAAAATGCA  
AAAGAAGC

GCTCGAGGTTTTTAAGGGCGAACTTTAACTAGATGGATTATTCAGTTTTTTTTTAAAGGATCAAAATCCTA  
CATTATATATATATATATATATATATATGTTTGTGTGTATATAAAAAAATCATTCTTGATCAAGATC  
AGCCTCTT

TTCCCTATCCACTTAGCTATGAACAAAATGTGCTTATCTGAGCTAATATTTTTTCATTTTTGTCTTATAAA  
TAATAATGGAAAAAATACTCATCGCGTGGTTGAACAGAAAAAACAATAAGAGTGAGTAAGCAGTGAA  
AAATGTAA

GAACGTTACCTGGTCATTTGGATGGAGATCTAAGTAACACTTACTATCTCCTATGGTACTATCCTTTACCA  
AAAAAATAAATAAATAAATAAATAAATAAATAAATAAATAAATAAATAAATAAATAAATAAATAAATAAATAA  
ACATCATT

AACAAAAAATATGAATATAAGAATAAATTGCAATAAATAGTAATATTTATAAAATATAAAAAAGAAGAAAT  
TTTTATTCTTTTTATTTTTATTATAAAATAGTTCAATTATTTATATTATTTAAATGTTGTAATTTATTAT  
TAATAATT

TCATACCTGTCTTTTTATGCTGCTATTGTGGAGGAACCGTCATCTTTTCGCGCGAAAAACAATATGATGC  
CTTTTTGAAACATGTTATTATTTGATTTTTTAAATGGCTTCTATTACGCGTCGTGGTTGGTGAACCTGGTAC  
AAAAATAA

TACAACTATTCTTTTTCTATTCCCCTCTGGTTAACAAAAACCAGTATATTAACAGAAATAAATAATAATA  
ACAAAAAATATGAATATAAGAATAAATTGCAATAAATAGTAATATTTATAAAATATAAAAAGAAGAATT  
TTTATTCT

TGTACGCCATTGTACACAAAAGTATTTTTTATATTTTTTTTACAATTTTTTATAATTTTTTTTTATGTTT  
AGTGTATATTTGCTAGAAAGAAACAAGATCTTTTTTGGTAGTGAAATGCTTAAACTTTGTCTCTTTTTCT  
TTTTTACT

ATTCGTACAATCATTTTTTACGGTCGAACTTCTGTAGTTACTCGATATATAAATATAAATAACGGACATAAA  
AAAAAAATTTGTAACATTATAAATCATAAAATCATAATCATATCTATTTCTAACTTCTGACTATTGCGCAA  
TTCGTTAG

AAGTCCCAATTGAAATACTTCTCCTTATAAATATCATGAAAGGAAGAAAAAAGTGAAAAA  
AACCAATAAAAAAATAAAAAATATCAATTCTACGAGAAATGCGTGCGAAATCGATGAGTTTTGTTTTGCC  
TCTGAAA

CCATAGATTCTATATGGAATAATAAAATTTACTTCTTACTAACATTATATCAGGGTGAATATTACTGACAA  
AAATAATAACTTAAGTCTTCTTTATAATATGATGATCGACGCGGGGTAACGCGCTCTTCCCATCTTTGT  
TTCCTTTC

TACGCGTCGCGTTTTCTATAAAAAATACATAAGCTAGTGAATAAAAGCTTTAAACGCGTTAGGGGGATCTG  
CAATTAAGTAAATAAATGAAATAAATGAAATAGATGAAAACTGGTTACACTAATTATAACGTTAATAAA  
ACTAGTTG

AAATAATAATAACAAAAAATATGAATATAAGAATAAATTGCAATAAATAGTAATATTTATAAAATATAAA  
AAGAAGAAATTTTTATTCTTTTTTATATTTTATTATAAAATAGTTCAATTATTTATATTATTTAAATGTTGT  
AATTTATT

GATGGAGATCTAAGTAACACTTACTATCTCCTATGGTACTATCCTTTACCAAAAAAAAAAAAAAAAAAAAA  
AAAAAAAAAATCAGCAAAGTGAAGTACCCTCTTGATGTATAAATACATTGCACATCATTGTTGAGAAATAG  
TTTTGGAA

TGTCGTTGAGTTCCAATCCTTCTTATTTATGGTTAACAAAGGAAAGAGGTGGAAGTTAAAAAATGGAAAT  
TAAAAAATCAAAAAAGAAAAATAAAATAGAAAAATTGGCACGGAATCTACAGGATTTAG  
CACTAGTA

TCACGAACACCGTCATTGATCAAATAGGTTTATAATATTAATATACATTTATATAATCTACGGTATTTATA  
TCATCAAAAAAAGTAGTTTTTTTTATTTTATTTTGTTCGTTAATTTTCAATGTCTATGGAAACCCGTTCCG  
TAAAATTG

AGCAATTTTTTTTTTTTTTTTTTGTACTCAATAATTACGAGCATATAATTTTAGTACTTCCAAAAAAG  
TTAAAAAATAGTGACAAATGTGTGTCAGTAAATATATATGAGAACATGGAATGTATTAAGTAATTC  
CATTCTA

TTTTCGCCGCGCGGTAGGCGAAAAGCAAAGAAAACACAGTAATATCCAGAAATAGATGCATTTTTATGTGC  
GAAATAAACTCATGCTGAAAAAATAGTAATAATTAATAGGGTAACGAATAGAATGCAAACCTTATCACG  
TGAAAGAG

GTAAAAAAGAAAAAGCTGTAAAAGACGACAACGTTGGCGTCGCGAAAATATTAATAGAACCATA  
TGTTGGATAATGTAGCCTCTATTATACACTTATCCCGATTACATTGTTTTAGCGACGGTAATCATTTTTT  
ATCCGGCA

ATCTACTATGGGCGTGTGGCGTAGTCGGTAGCGGCTCCCTTAGCATGGGAGAGGTCTCCGGTTTCGATTCC  
GGACTCGTCCATTTTAAATTTCTTTTTTTTTTTTTCTTTCCGTATGTAAGCTTTTTTCTTTTTTTTT  
TTTTTTTT



AAACGCTGCTATTTAAAAGGAAAAATTTTCCCAATTACGCGGGTAATACAAAAAGATATAGCCCATTGTT  
ATAAAAATATGTATGTGTTCAATATAGTGGTATATAGGTGTTATTTGCGCTGAATGATGTACTTGTCAATG  
TCTGCGGG

AATCCCGTGAAGTCTTGGTACTATCAAATTCGTTGGTTTTTTTTCTGGGAAAACCTCTATCAAAGTATAAGG  
TGCGCTTTTAAACGTAATTTATAATGATTTTTTAGAAATAATAATGTATATAGTATAAAAAATAAACAAAC  
TTTTAAAA

AAAAATGCGATGGTATATATATAGATATATATATATATATATATATGTATCTGTATATATATGTTCATAATATA  
TATATATCTATTATTGTTGTTATTATTATCGTGATTATTATTTAGGTCCTCCCTTCTTTTTACCTGTTTTT  
AATCTACC

TTATTTTAAAGGTTACCCTGTAAAGGTCTGATATGTAGGGGAGGGCATATAATCATTTTAATATATATGTAT  
ATATTCTTACATATATATATAATATCGCCGTAACCTTATAGCGTAAACTATATAAAATACGTCTTAGTCTAT  
AAGCTATC

CTTTCATATTTTTATTTTTCGCGTTACACTAAATTCAAATATTA AAAAAGGATCGCTATTAATGTGTAGAAA  
TTGAAAAAATTACATACAGAAGCGTATAAAATTCCTTATCATCTATTTTACCCTTCTACTGAGTTATTTG  
GATATTTT

ATTCAAAAAGTTAGCAGCGAGATCTTTTTTCTATCGCGCGTTAAAACGTTTGAACAGATATATATTATTCA  
GCCACAACCTATCTATATATAATATTTCTTCGATTTTTTCGTTTTCTCAAGTTTCGTCTTATTGATTGATCAG  
AAGTTTAC

AAGGAAGGAGAGGATGTTGAAGTTCCTTTTATTACCATTTCATCTATGAGTAACTAATTAACCAAATAAAA  
AAATAAATTAATATATACATTAAATATGTATATATATATGTATGACTTTTGACAACTTTTCTTTGGTAA  
AACTTAT

AAACTTTATAATAGATGTGGGGAAATCACCTTTGACGATGTGCAACGGAGAACTATTTTTTTTTTTTTCTTT  
TTTTCTTTTTTTTTTTTTTTTTTTTTGGTCCGAACAATGCGATGAGCCAGACGAAGAAAAAATAAAAAATGAGA  
ATGAGTAA

AGTAATGGTTATTCAAAGTTAGCAGCGAGATCTTTTTTCTATCGCGCGTTAAAACGTTTGAACAGATAT  
ATATTATTAGCCACAACCTATCTATATATAATATTTCTTCGATTTTTTCGTTTTCTCAAGTTTCGTCTTATT  
GATTGATC

TCCTTATTTATGGTTAAACAAGGAAAGAGGTGGAAGTTAAAAAATGGAAATTA AAAAAAAAAAAAAAATCAA  
AAAAAGAAAAATAAAAAATAGAAAAATTTGGCACGGAAATCTACAGGATTTAGCACTAGTAGGGGGTTTTATTA  
AGCACTAC

TGGTTAAACAAGGAAAGAGGTGGAAGTTAAAAAATGGAAATTA AAAAAAAAAAAAAAATCAA AAAAAAGAAAA  
ATAAAAAATAGAAAAATTTGGCACGGAAATCTACAGGATTTAGCACTAGTAGGGGGTTTTATTAAGCACTACAG  
GTCGACTT

AGCATTTTTTTATATACTATATTATGAGAAATCTTTCTGAAAAATTATGAATTACTTTTTTCTGCTGATAG  
TACAACCCGCTATATACTGTTACAAGTAGTGAATAAAGAAGTAAAAA AAAAAA AACTTTCAAAGGAAAGAA  
TATGAAGT

TTCAAAGTCCAAAAGACTCTCGGCACGAAGGTTGAAATACCCTATACTAATTGTTTGGCTTTGTCTTTTTGT  
ATATATCCGAACGTATCTATCTGAAATTTTTCAAATTTATAAAAAATAATATATATAAAAGGAAAAA  
AAAATCGA

TATATATCCGAACGTATCTATCTGAAATTTTTCAAATTTATAAAAAATAATATATATAAAAGGAAAAA  
AAAAATCGATGCCCTACTAATAGAGATTGGAGCTGAAAAGAAAAAGTGTACATCAAACGCTATATCTCGAG  
GTTTGGGA

ATAGATGTGGGAAATCACCTTTGACGATGTGCAACGGAGAACTATTTTTTTTTTTCTTTTTTTCTTTTT  
TTTTTTTTTTTTGGTCCGAACAATGCGATGAGCCAGACGAAGAAAAAATAAAAAATGAGAATGAGTAATT  
ATGTTAAG

TTTTCAATTTTGTGCGTTGAGTTCCAATCCTTCCTTATTTATGGTTAACAAGGAAAGAGGTGGAAGTTAAAA  
AAATGGAAATTAATAAAAAAAAAAAAAATCAAAAAAGAAAAATAAAAAATAGAAAAATTGGCACGGAAATCTA  
CAGGATTT

TATGAATATAAGAATAAATTGCAATAAATAGTAATATTTATAAAATATAAAAAAGAAGAAATTTTTATTCTT  
TTTATATTTTATTATAAAATAGTTCAATTATTTATATTATTTAAATGTTGTAATTTATTATTAATAATTAT  
ATTTTATC

AATCAACAAATTGAAGTTGCGCAATGTGCGATTGCTTATGTATCAAAAAAACTAAAAAATGAATAGAGA  
AAATCATATATATAAAAGAAAAAATATCGTACACCTCTTAGGTAACCTGGAATATATTAACATGTAAAG  
AAGGAGAA

TTGAAGTTGCGCAATGTGCGATTGCTTATGTATCAAAAAAACTAAAAAATGAATAGAGAAAATCATATA  
TATAAAAGAAAAAATATCGTACACCTCTTAGGTAACCTGGAATATATTAACATGTAAAGAAGGAGAAAA  
CATTAACC

AAACTCTATCAAAGTATAAGGTGCGCTTTTAAACGTAATTTATAATGATTTTTTTAGAAATAATAATGTATAT  
AGTATAAAAAAATAAACAACTTTAAAAAAAAGAGTGAAGAACTGTAAAGCTCATTTTATAGGTTTCAAAA  
GAAAGCTT

TAAGTAACACTTACTATCTCCTATGGTACTATCCTTTACCAAAAAAAAAAAAAAAAAAAAAAAAAAAAA  
TCAGCAAAGTGAAGTACCCTCTTGATGTATAAATACATTGCACATCATTGTTGAGAAATAGTTTTGGAAGT  
TGTCTAGT

TGCTTTTTCTGCTCATTATAGTTAACTTGATTTGAAATTACGCGTCGCGGGGAATCGCGTAAAACCTCGA  
TATTAATCCTGTGATTTTGCAAAAGTAAATTTTTTACTATCTACATCTCTCCAATTTGCACAACCTTTGAC  
AGGACTGA

CATGCCATCTTAAGCTCTGCTGTGCTCTTCTCGTTAAGGAAAAATGCGATGGTATATATATAGATATATA  
TATATATATATGTATCTGTATATATATGTTTACATATATATATATCTATTATTGTTGTTATTATTATCG  
TGATTATT

CGCATACACAATATATACATTCTACTAGCTTTTTTTTTCTTCAATTCGATAGTTTAGATGGGTTTATATCT  
AAATATATATATATAGTATTTTATTTTATTTTCAATCTCCTAGTATACATGAAATATTTAACGCTTTTTTT  
TGCCCTTG

AGATGGATTATTCAGTTTTTTTTTAAAAGGATCAAAATCCTACATTATATATATATATATATATATATGTTT  
GTGTGTGTATATAAAAAAAAAAATCATTTCTTGATCAAGATCAGCCTCTTATATATGTGCGCATCAATCTTCT  
GTAGGGAT

ATCTACCATCAAACCTGCCATTTTTGATCCCAAACGCTGCTATTTAAAAGGAAAAATTTCCCAATTACGCG  
GGTAATACAAAAAGATATAGCCATTGTTATAAAAAATATGTATGTGTTCAATATAGTGGTATATAGGTGT  
TATTTGCG

TTTGTAAGTACTTTTCATATTTTTATTTTTCGCGTTACACTAAATTCAAATATTAATAAAGGATCGCTATTAA  
TGTGTAGAAATTGAAAAAATTACATACAGAAGCGTATAAAATCTTATCATCTATTTTACCCTTCTACTG  
AGTTATTT

TAACAGAAATAAATAATAATAACAAAAAATATGAATATAAGAATAAATTGCAATAAATAGTAATATTTAT  
AAAATATAAAAAGAAGAAATTTTTATTCTTTTTTATATTTTATTATAAAATAGTTCAATTATTTATATTATT  
TAAATGTT



ACGAGAAAAGAAACGCGAAGGAACGAAAGAAGATGAAAAAATGCAGCGATAAAATGATATTGTGGTTAAT  
CTAAATTTATATATATATATATATATATACATATATATATAGAAATCTATTGTTATACACAAAATACTTATT  
TTTTAATA

GGAAGCCAAGAATTGAGAAAAAGAAAAACCCGCGAGTAAGGAAATTAATACAGGTGTACACATACACGC  
ACACATATATATATATATATATATGTATATGTGTATATAGGAAGCGCGCATGTTAGTATATACGATTCCG  
TTGGAAAG

AAAGAAAAACCCGCGAGTAAGGAAATTAATACAGGTGTACACATACACGCACACATATATATATATATAT  
ATATGTATATGTGTATATAGGAAGCGCGCATGTTAGTATATACGATTCCGTTGGAAAGGGCCGTCACC  
AAACGTGA

TGACCTTTTTTGATTATGTTACCACCCATTTTTGCATTCTTCTTTTTTTTTTTTTTTTTTTGGGTCTGAAAA  
TTTTTTTGCTTCTACTTAATTATAATTTTATATAATCATATATGGATCTGATTCTTAAAAAAAATGAAAA  
AAAGACAA

CTGGAAATGTAAGATGAATTCAGTATCAAGTGCCGTTGGTATTATAGTTTATCAATTAATACGTAAATAT  
ATATATATATATATATATATATATATATGACTATAGTGGCATACTTCTCAATGGACTGTTGCTTCTATCAT  
TTTATACA

TAATCACTTTCAACCGCGGTTTATCCGGCCCCACCCATGCATAACCCTAAATTATTAGATCACTTAGCACG  
TGAAAAAGAAACGTTTTTAATGTTTTTTTTTTTTTTTTCTTTTTCTTTTTTTCGTTGGTGAAAAATTTTT  
CGTTCTCT

TTTATTGATTTTTAAAAACAATATAAATGAAAGAAAAAATGTGTTTTAGATTAGGCTTATAAGATATGACC  
CATATCATAATTAAGGCGATTTAGTTGTTCTTTTTAAAAAAGAGAAAAAAAAAAAAAAAAAAAAAAAA  
GGGAATGA

CCATTTTTTTCTATTTACCCTTCTTCTTTTTATTTTACGCGTCTCGCGTTTTATATATTAATAGTAATAAT  
ATTTAATAGTGTATGTTTGAATTTTTATATGTCTTTATTTTCGCTAACGTAAAAATCCCTTCTTCTTTGTA  
GGGACGGG

TTTTGCATTCTTCTTTTTTTTTTTTTTTTTTTGGGTCTGAAAAATTTTTTGCTTCTACTTAATTATAATTTTA  
TATAATCATATATGGATCTGATTCTTAAAAAAAATGAAAAAAGACAAAACAAACCATATAGGTAACAAT  
TTCTCTTA

TATCACTCGGCTCTCTAAAAGAAGTCATGTTCCCTTCGTTGGGTTAATTTTTTTTTTTTTTTTTTTGTTT  
ATATGTTTTTTTTTTTTTTGCCAGGTATTGTTAGCGCCAGATAGCAAAAAATTTTATTCAGGGATACTGAA  
CACCGGG

TTCTTCATTTCCATTTTTTTCTATTTACCCTTCTTCTTTTTATTTTACGCGTCTCGCGTTTTATATATTA  
TAGTAATAATATTTAATAGTGTATGTTTGAATTTTTATATGTCTTTATTTTCGCTAACGTAAAAATCCCTT  
CTTCTTTG

AGATGAAAAAATGCAGCGATAAAATGATATTGTGGTTAATCTAAATTTATATATATATATATATATACAT  
ATATATATAGAAATCTATTGTTATACACAAAATACTTATTTTTTAATATAGATGGCTGCAGATAAAGTAA  
TAGTTTTA

AACTCTGTTTTTCTTCATTTCCATTTTTTTCTATTTACCCTTCTTCTTTTTATTTTACGCGTCTCGCGTTT  
TATATATTAATAGTAATAATATTTAATAGTGTATGTTTGAATTTTTATATGTCTTTATTTTCGCTAACGTA  
AAAATCCC

TTAAAAACAATATAAATGAAAGAAAAAATGTGTTTTAGATTAGGCTTATAAGATATGACCCATATCATAA  
TTAAAAAAGCGATTTAGTTGTTCTTTTTAAAAAAGAGAAAAAAAAAAAAAAAAAAAAAAAAAGGGAATGAGT  
TTGTACAT

CAACCGCGGTTTATCCGGCCCCACCCATGCATAACCCCTAAATTATTAGATCACTTAGCACGTGAAAAAGAA  
ACGTTTTTAAATGTTTTTTTTTTTTTTTTTTTTCTTTTTCTTTTTTTCGTTGGTGAAAATTTTTTCGCTTCCTCG  
AGTATAAT

AATTGAGAAAAAGAAAAACCCGCGAGTAAGGAAATTAATAACAGGTGTACACATACACGCACACATATAT  
ATATATATATATATGTATATGTGTATATAGGAAGCGCGGCATGTTAGTATATACGATTCGTTGGAAAGGG  
GCCGTCCA

ATTCAATATCAAAAAAGAAATCCATTGGGCCCTTAGTGCATTTTTATTTTTTTTTTTTTTTTTTTTTTTTTT  
TTCTCTTCTGAATTAGAGTACATCTCATCGCAGGGTCTCTTTTTGCACGTTTTTGATGTTGCTTATGAGA  
CGCTTTGC

TTTTCTAAGAATTTTCATTATTAGAAGGAGTAATGCTTACGGTACACATACATACACATATATATATATA  
AATATATATATATATAAGGACATATACAGATTTTTTTTTTTTTTCGCGTACTAAAGTACAGAACAAAGAAAATA  
AGAAAAGA

GTTGAATTTACAAAAGGTAATTTATAGTACGTGAACATGTGTGCGTATATACATATATATATATATATA  
TATATATATATATATATACTTTAGCATCGAAACAGCTAGTCCTTTTTAGAGTTCAATTTTTCCACAAAG  
GCTTTTTT

ACCACCCCATTTTTGCATTCTTCTTTTTTTTTTTTTTTTTTTGGGTCTGAAAATTTTTTTGCTTCTACTTAAT  
TATAATTTTTATATAATCATATATGGATCTGATTCTTAAAAAAAATGAAAAAAGACAAAACAAACCATAT  
AGGTAACA

TTAGTTGAATAACTCTGTTTTTCTTCATTTCCATTTTTTTCTATTTACCCTTCTTCTTTTTATTTTACGCG  
TCTCGCGTTTTATATATTAATAGTAATAATATTTAATAGTGTATGTTTGAATTTTTATATGTCTTTATTT  
CGCTAACG

TGCGGCAATTACTTTTTCCCAAAAAGCTCATAATCGATCAATTAACGCGTAAACGAAAAACAAAAAAAAAAAA  
AAATACGTAAATTAGGTCTTCATACGAGCGTTTTTTTTTTTTTTGAGGATCGTTTGCATGTCTAGCGCGGCA  
AGCGTGTT

AAATGTTTTTATTGTTTCGGATAACAAATACAATAGTGTTATTAAAAAATAAAACTTATTTAAAAATAGTAA  
TTTTAAATTATTATTTTATTTTAATAAACTTTTTAATAATATTTATTACACGTGATTTAATATATCCTGTTT  
TTTTTTCA

CTATTTACCCTTCTTCTTTTTATTTTACGCGTCTCGCGTTTTATATATTAATAGTAATAATATTTAATAGT  
GTATGTTTGAATTTTTATATGTCTTTATTTTCGCTAACGTAAAAATCCCTTCTTCTTTGTAGGGACGGGGG  
AGTGTTA

AGTCACTATTATTTTTTTTTTTTATTCATAAGTACAATTGAATAATATTATTGATTTTTTTATTATTGTTCT  
TATTCTTTTTTTATCATTCTATATAAAATATTATATGATTTAGTTTATCGTAAAAAATTAAAAAATACA  
GAGGAAAG

AATTTTCATTATTAGAAGGAGTAATGCTTACGGTACACATACATACACATATATATATATAAATATATATA  
TATATAAGGACATATACAGATTTTTTTTTTTTTTCGCGTACTAAAGTACAGAACAAAGAAAATAAGAAAAGAAG  
GCGATCAT

TCGAGAAAGAGGAAGCCAAGAATTGAGAAAAAGAAAAACCCGCGAGTAAGGAAATTAATAACAGGTGTAC  
ACATACACGCACACATATATATATATATATATATATGTATATGTGTATATAGGAAGCGCGGCATGTTAGTAT  
ATACGATT

TTCTTTCTTTTTCTAAGAATTTTCATTATTAGAAGGAGTAATGCTTACGGTACACATACATACACATA  
TATATATATAAATATATATATATATAAGGACATATACAGATTTTTTTTTTTTTTCGCGTACTAAAGTACAGAAC  
AAAGAAAA

CGACAGCCGCTGCGGCAATTACTTTTTCCCAAAAAGCTCATAATCGATCAATTAACGCGTAAACGAAAAACA  
AAAAAAAAAAAAAATACGTAAATTAGGTCTTCATACGAGCGTTTTTTTTTTTTTTGAGGATCGTTTGCATGTC  
TAGCGCGG

CAAAAGGTAATTTATAGTACGTGAACATGTGTGCGTATATACATATATATATATATATATATATATATA  
TATATATATACTTTAGCATCGAAACAGCTAGTCCTTTTTAGAGTTCAATTTTTCCACAAAGGCTTTTTTAG  
CCAATTCA

AACAATCTTGCGGCACACCGCTTGAACGAAACGTTGTAATAATATTTATAATTCTTATTATTATTATTTA  
TTATTATTATAATATATATAATTTAATAATCTTAATATTTATTATCATTGTTTCATATTTTTTTTTTATAAA  
TATTTATT

CGACAGTGAAAAATGCACAGAACATTCAAAATTATACTTATAATATGACTCTTTTTCTTTTATTGCAGTTGG  
TATTATATACATATATATATATATATATATATATATATATATATATATATATATATATATATATATATAT  
AGTGTAAAG

AATTATATACTCGAGAAAGAGGAAGCCAAGAATTGAGAAAAAGAAAAACCCGCGAGTAAGGAAATTAAT  
ACAGGTGTACACATACACGCACACATATATATATATATATATATATATATATATATATATATATATATAT  
ATGTTAGT

AAGAAAGAGTTTTATTGATTTTTAAAAACAATATAAATGAAAGAAAAAATGTGTTTTAGATTAGGCTTATA  
AGATATGACCCATATCATAATTAATAAAGCGATTTAGTTGTTCTTTTTAAAAAAGAGAAAAA  
AAAAAA

AAAATCATCACTGGAAATGTAAGATGAATCAAGTATCAAGTGCCGTTGGTATTATAGTTTATCAATTAAT  
ACGTAAATATATATATATATATATATATATATATATATATATATATATATATATATATATATATATATAT  
CTTCTATC

AATGCAGCGATAAAATGATATTGTGGTTAATCTAAATTTATATATATATATATATATATATATATATACAT  
AAATCTATTGTTATACACAAAAATACTTATTTTTTAATATAGATGGCTGCAGATAAAGTAATAGTTTTATA  
TATAGGTA

AAAAAAGAAATCCATTGGGCCCTTAGTGCATTTTTATTTTTTTTTTTTTTTTTTTTTTTTTTTTTTCTCTTTCT  
GAATTAGAGTACATCTCATCGCAGGGTCTCTTTTTGCACGTTTTTGATGTTGCTTATGAGACGCTTGCCT  
TTTTAACT

TTCTTTTTTTTTTTTTTTTTTTTTGGGTCTGAAAATTTTTTTGCTTCTACTTAATTATAATTTTATATAATCATA  
TATGGATCTGATTCTTAAAAAATGAAAAAAGACAAAACAAACCATATAGGTAACAATTTCTCTTAGT  
GACATAAA

TGATTATGTTACCACCCATTTTTGCATTCTTCTTTTTTTTTTTTTTTTTTTTTTTTTTTTTTTTTTTTTTCTCTTTCT  
TCTACTTAATTATAATTTTTATATAATCATATATGGATCTGATTCTTAAAAAATGAAAAAAGACAAA  
CAAACCAT

CCGCGAGTAAGGAAATTAATACAGGTGTACACATACACGCACACATATATATATATATATATATATATATAT  
GTGTATATAGGAAGCGCGCATGTTAGTATATACGATTCGTTGGAAAGGGCCGTCCACCAAACGTGACT  
TGACGAGT

GCAAGCTATTCGACAGTGAAAAATGCACAGAACATTCAAAATTATACTTATAATATGACTCTTTTTCTTTTA  
TTGCAGTTGGTATTATATACATATATATATATATATATATATATATATATATATATATATATATATATAT  
TTCCAAAA

AATTCATTATTATTATTATTTATTATTATTATAATATATATAATTTAATAATCTTAATATTTATTATCATTG  
TTTCATATTTTTTTTTTATAAATATTTATTTAATAAAAAATATTAAGAGTATTCAAAAAGTCTTACTGT  
GGGTAATG

ATAAATATGTTTAATGAATGATTCAATATCAAAAAAGAAATCCATTGGGCCCTTAGTGCATTTTTATTTT  
TTTTTTTTTTTTTTTTTTTTTTTTCTCTTTCTGAATTAGAGTACATCTCATCGAGGGTCTCTTTTTGCACGT  
TTTTGATG

CAGTTCAGAAAAAGAGGCTGTTGAATTTACAAAAGGTAATTTATAGTACGTGAACATGTGTGCGTATATA  
CATATATATATATATATATATATATATATATATATATATACTTTAGCATCGAAACAGCTAGTCCTTTTTAG  
AGTTCAAT

GAGTAGTGTAGTGGGTGACCATACGCGAAACTCAGGTGCTGCAATCTTTATTTCTTTTTTTTTTTTTTTTT  
TTTTTTTTTTTTTTCTAGTTTCTTGGCTTCCATGCTAAATCCATAACTAACCTACCATTTCGATTCAGAAAA  
ATTCGCAC

GTTGTCAGAATTAGGTGCCTCCTGCTTTTTTTTTTTTTCTGCTTTATATCCGTTATATCCGAATGATTTT  
TATCGCTTGTAAAAAATACTTTCCCGATATATATATATATAGTCTCCCTTTAAATTTGTTTCCGGTAAGTT  
TTTAACAC

CATCCCATTCCATTTCGCTACTTCTTTTTCTTTTTCTAAGAATTTTCATTATTAGAAGGAGTAATGCTTAC  
GGTACACATACATACATATATATATAAATATATATATATAAGGACATATACAGATTTTTTTTTTTTT  
CGCGTACT

CAACTGGCCTTATCACTCGGCTCTCTAAAAGAAGTCATGTTCCCTTCGTTGGGTTAATTTTTTTTTTTTTTT  
TTTTTTGTTTATATGTTTTTTTTTTTTTTTTGCCAGGTATTGTTAGCGCCAGATAGCAAAAAATTTTATTAG  
GGATACTG

GTTTGAAAAAAAAAAAAAAAAAATTTCCCTTATCAATGATATCCTTACGATTATATAAATTCCTTACCTAAA  
CCTATTATTTGTGTACATATATCAGAGTATTATTACATATATAACCTTTTTCTCTAAAACAGGAAAAAAAA  
AAGAAAAC

CTAGTCTTCAAGTCACTATTATTTTTTTTTTTTATTCATAAGTACAATTGAATAATATTATTGATTTTTTTA  
TTATTGTTCTTATTCTTTTTTTTATCATTCTATATAAATATTATATGATTTAGTTTATCGTAAAAAATTT  
AAAAATA

CATTTCGCTACTTCTTTTTCTTTTTCTAAGAATTTTCATTATTAGAAGGAGTAATGCTTACGGTACACATA  
CATACACATATATATAAATATATATATATAAGGACATATACAGATTTTTTTTTTTTTTCGCGTACTAA  
AGTACAGA

TATAAATGAAAGAAAAAAAAATGTGTTTTAGATTAGGCTTATAAGATATGACCCATATCATAATTAAAAAAG  
CGATTTAGTTGTTCTTTTTAAAAAAGAGAAAAAAAAAAAAAAAAAAGGGAATGAGTTTGTACATAC  
TATTATAT

ATTTTTTTTTTTTATTCATAAGTACAATTGAATAATATTATTGATTTTTTTTATTATTGTTCTTATTCTTTTT  
TTATCATTCTATATAAATATTATATGATTTAGTTTATCGTAAAAAATTAATAAATACAGAGGAAAGCA  
AAAGTAAA

TTAATGAATGATTCAATATCAAAAAAGAAATCCATTGGGCCCTTAGTGCATTTTTATTTTTTTTTTTTTTT  
TTTTTTTTTTTTTTCTCTTTCTGAATTAGAGTACATCTCATCGAGGGTCTCTTTTTGCACGTTTTTGTGTT  
GCTTATGA

ATTAGAAGGAGTAATGCTTACGGTACACATACATACATATATATATAAATATATATATATATAAGGA  
CATATACAGATTTTTTTTTTTTTTCGCGTACTAAAGTACAGAACAAGAAAATAAGAAAAGAAGGCGATCATTG  
AACTACTG

TAACAGATATTTAGTTGAATAACTCTGTTTTCTTCATTTCCATTTTTTTCTATTTACCCTTCTTCTTTTT  
ATTTTACGCGTCTCGCGTTTTATATATTAATAGTAATAATTTAATAGTGTATGTTTGAATTTTTATAT  
GTCTTTAT

GAACGAAAGAAGATGAAAAAATGCAGCGATAAAATGATATTGTGGTTAATCTAAATTTATATATATATATAT  
ATATATACATATATATATAGAAATCTATTGTTATACACAAAAATACTTATTTTTTAATATAGATGGCTGCA  
GATAAAGT

CTCTCTAAAAGAAGTCATGTTCCCTTCGTTGGGTTAATTTTTTTTTTTTTTTTTTTTTTTGTTTATATGTTTTT  
TTTTTTTTTTGCCAGGTATTGTTAGCGCCAGATAGCAAAAAATTTTATTCAGGGATACTGAACACCGGGGAA  
GTTAACTG

AAAAGAGGCTGTTGAATTTACAAAAGGTAATTTATAGTACGTGAACATGTGTGCGTATATACATATATATA  
TATATATATATATATATATATATATATACTTTAGCATCGAAACAGCTAGTCCTTTTTAGAGTTCAATTT  
TTCCACAA

TCCCTGGATTTTGAGATGGGAAAAGTTTCAATGCGTTCATCGTATAGTATGATGTATTCAAAAAAATGC  
GATAATTCCTTAGTTGTCGGCACTTCGGAAGCCAAAAAAAAAAAAAAAAAAAAAAAAAAGAAAAAAGAAAAG  
GGTGTCTA

AGAAAAAATGTGTTTTAGATTAGGCTTATAAGATATGACCCATATCATAATTAAAAAAAGCGATTTAGTT  
GTTCTTTTAAAAAAGAGAAAAAAGGGAATGAGTTTGTACATACTATTATATTA  
ATGTAGTA

CCCAGAAAAAATCATCACTGGAATGTAAGATGAATTCAGTATCAAGTGCCGTTGGTATTATAGTTTT  
ATCAATTAATACGTAAATATATATATATATATATATATATATATATATGACTATAGTGGCATACTTCTCAA  
TGGACTGT

GGAGTGAATCTTAAAAGCCGAAAAGGAAATTCAAAATCTGTCTATTTATAGGCCGTCGCGCTCTACGAAA  
ACGCGAAATTTCAAACGGAAAACGGAAAAAATCTAAAAAAGAAATTAATTGAGAGATCTCACGGAAA  
TGCCGCGA

AAAAAAGAAAAGACTCCGTTTAACTTTCAACCGCGGTTTATCCGGCCCCACCCATGCATAACCTAAA  
TTATTAGATCACTTAGCACGTGAAAAAGAAACGTTTTTAAATGTTTTTTTTTTTTTTTTTTTTCTTTTTCTTTTT  
TGCGTTGG

ACTTTTACGACAACCTGGCCTTATCACTCGGCTCTCTAAAAGAAGTCATGTTCCCTTCGTTGGGTTAATTTT  
TTTTTTTTTTTTTTTTTTTTGTTTATATGTTTTTTTTTTTTTTTTTGGCAGGTATTGTTAGCGCCAGATAGCAAAAA  
TTTTATTC

ACGTTTCGTAATAATTTATAATTTATTATTATTATTATTATTATTATAATATATATAATTTAATAAT  
CTTAATATTTATTATCATTGTTTCATATTTTTTTTTTATAAATATTTATTTAAATAAAAAATATTAAGAGT  
ATTCAAAA

ACTTTTCCCCAAAAGCTCATAATCGATCAATTAACGCGTAAACGAAAAACAAAAAAAAAAAAAAAAATACGTAA  
ATTAGGTCTTCATACGAGCGTTTTTTTTTTTTTTTTGAGGATCGTTTGCATGTCTAGCGCGGCAAGCGTGT  
CAGGCATT

TAAAAAATTTTCCGCAGGATATAGAAAAAAGAAATGAAATTATAGTAGCGGTTATTTCCGTGGGGTGC  
TTTTTTACACCTGTACATCTTTTCCCTCCGTACATTTTTTTTTTATTTTTTTTTTTTTTTGGTTTTTTTTTTTCGAT  
ATTTTTCC

CGGACCCTGAATTACTGACACAAAATGAAGGGATCAGTGGCCCTGAAAAAAAAAAAAAAAAAATAAACGGC  
GCGCGGAGTAATTATGATTATGATTATGGTTATGATTATTATTACAACCTCACTATTCTAAGTCTATATCGT  
AAATAAGG

TAACAAATACAATAGTGTATTAAAAAATAAACTTATTTAAAAATAGTAATTTAAATTATTATTTTTATTT  
TAATAAATTTTTAATAATATTTATTACACGTGATTTAATATATCCTGTTTTTTTTTTCATCATTCTCTTTT  
TTTCTTAT





GGATCAGTGGCCCTGAAAAAAAAAAAAAAAAAAAAAAAAATAAACGGCGCGCGGAGTAATTATGATTATGATTATGGT  
TATGATTATTATTACAACACTACTATTCTAAGTCTATATCGTAAATAAGGGTCGTGTCCGTAGAATTCCCCT  
GCCAGCCT

CTTGAACGAAACGTTTCGTAAAAATATTTATAATTCTTATTATTATTATTTATTATTATTATAATATATATA  
ATTTAATAATCTTAATATTTATTATCATTGTTTCATATTTTTTTTTTATAAATATTTATTTAAATAAAAAAT  
ATTAAGA

CCCTGAAAAAAAAAAAAAAAAAAAAAAAAATAAACGGCGCGCGGAGTAATTATGATTATGATTATGGTTATGATTATT  
ATTACAACACTACTATTCTAAGTCTATATCGTAAATAAGGGTCGTGTCCGTAGAATTCCCCTGCCAGCCTCT  
GTTGCCAC

GTATACTGGGAACAATCTTGCGGCACACCGCTTGAACGAAACGTTTCGTAAAAATATTTATAATTCTTATTA  
TTATTATTTATTATTATTATAATATATATAATTTAATAATCTTAATATTTATTATCATTGTTTCATATTTT  
TTTTTATA

ATTATACTTATAATATGACTCTTTTTCTTTTATTGCAGTTGGTATTATATACATATATATATATATATATAT  
ATGTATATGTTCCCCGAGACAATGGTTTTATTTCCAAAAAAGTGAAGTAAGTTATTTTCTGTGTATAAA  
AAAATAAA

AAACATGTGCGCGTTTTGTGACAAAAACATAAATAAAACAAAAATAATAAAAAGTCAAGTGAAAAGCACTGA  
AATCTAAAAATAAATACATATACATATATATATATATATACCTATTTTCGTTTCCGCATAGAAGAAATTGG  
AGGCAACT

TCAAAATAAAACAAAATAAAATAGAGTAAGTGAAAGACAAATGGAGGAAAAAAAAAAAAAAAAAAAAAAAAA  
AAAAATAGTAAAAAGTGAAAGGAGAACGATGATAACACTAATCACACCTCCGCATTTTCAACCAATGCTG  
CAAGTTTC

CCATATCATAATTAAAAAAAGCGATTTAGTTGTTCTTTTTAAAAAAAAGAGAAAAAAAAAAAAAAAAAAAA  
AGGGAATGAGTTTGTACATACTATTATATTAATGTAGTATCACGTTAAAAAGCCGTAGTCATCATTAATCG  
TCCAAAAG

AGCAAATAATGAATATAGGGGAACATAAATGTTATGGACAAGAGTAGATATCAAAATAAAACAAAATAAAA  
TAGAGTAAGTGAAAGACAAATGGAGGAAAAAAAAAAAAAAAAAAAAAAAAAAAAAATAGTAAAAAGTGAAA  
GGAGAACG

TTAAAAGCCCGAAAAGGAAATTCAAAATCTGTCTATTTATAGGCCGTGCGCTCTACGAAAACGCGAAATT  
ATTCAAACGAAAACGAAAAAATCTAAAAAAGAAATTAATTGAGAGATCTCACGAAATGCCGCGAGG  
AATGTTTC

CTTTGTGAAAGCCCTTCTCTTTCAACCCATCTTTGCAACGAAAAAAAAAAAAAAAAAAAAATAAAAAATAAAAA  
CCAAATAGTAAATAGTAACTTACATACATTAGTAAATGGTACACTCTTACACACTATCATCCTCATCGTAT  
ATTATAAT

AAGGATGTCCTGACCTTTTTTTGATTATGTTACCACCCATTTTTGCATTCTTCTTTTTTTTTTTTTTTTTT  
GGTCTGAAAATTTTTTTGCTTCTACTTAATTATAATTTTATATAATCATATATGGATCTGATTCTTAAAA  
AAAATGAA

GAAGTCATGTTCCCTTCGTTGGGTTAATTTTTTTTTTTTTTTTTTTTTTTGTTTATATGTTTTTTTTTTTTT  
CCAGGTATTGTTAGCGCCAGATAGCAAAAAATTTTATTCAGGGATACTGAACACCGGGGAAGTTAACTGAG  
TATATCGG

TTTTTTGATTTTATTTATTTACTTTTTACGACAACCTGGCCTTATCACTCGGCTCTCTAAAAGAAGTCATGTT  
CCCTTCGTTGGGTTAATTTTTTTTTTTTTTTTTTTTTTTGTTTATATGTTTTTTTTTTTTTTGCCAGGTATTGT  
TAGCGCCA



TCTTCCGGTACGACAGCCGCTGCGGCAATTACTTTTTCCCAAAGCTCATAATCGATCAATTAACGCGTAA  
ACGAAAAACAAAAAAAAAAAAAAAAATACGTAAATTAGGTCTTCATACGAGCGTTTTTTTTTTTTTTGAGGATCG  
TTTGCATG

TTTATAGTACGTGAACATGTGTGCGTATATACATATATATATATATATATATATATATATATATATATA  
CTTTAGCATCGAAACAGCTAGTCCTTTTTAGAGTTCAATTTTTCCACAAAGGCTTTTTTAGCCAATTCAT  
TAGGATAT

GAAAAAAGGGCCACGGGATTTTTTTTTTCGCGTTTTGGCGTTTTCATATCAAAAAAAAAAACCATATTAAC  
ATCTGTACATTATTATTAATAACTAAACATCCGTACACAAAAGGTTTTCCAAGACAAAACGTTGTGAGACTAT  
TCTCTTTC

GAATTTTTCGCGTTTTGATGAAGCACAGGAAGAATTTCTTTTTTTTTTTGGCTTCTTCTGGTTCCGTTTTTTA  
CGCGCACAAATCTAAAAAAGAAATAATTATAACCTAGTCTCGAAAATTTTCATCGATCCATTCGTTCCCTT  
TTTTTCGA

CAAAATGAAGGGATCAGTGGCCCTGAAAAAAAAAAAAAAAAATAAACGGCGCGGGAGTAATTATGATTA  
TGATTATGGTTATGATTATTATTACAACCTCACTATTCTAAGTCTATATCGTAAATAAGGGTCGTGTCCGTA  
GAATTC

AAAACAACACTCTTCCGGTACGACAGCCGCTGCGGCAATTACTTTTTCCCAAAGCTCATAATCGATCAAT  
TAACGCGTAAACGAAAAACAAAAAAAAAAAAAAAAATACGTAAATTAGGTCTTCATACGAGCGTTTTTTTTTTTT  
TTGAGGAT

AAAAGCTCATAATCGATCAATTAACGCGTAAACGAAAAACAAAAAAAAAAAAAAAAATACGTAAATTAGGTCTT  
CATACGAGCGTTTTTTTTTTTTTTGAGGATCGTTTGCATGTCTAGCGCGGCAAGCGTGTACAGGCATTCCG  
TTGTGTGT

AAGATATGACCCATATCATAATTAATAAAGCGATTTAGTTGTTCTTTTAAAAAAAAAGAGAAAAAAAA  
AAAAAAAAAAGGGAATGAGTTTGTACATACTATTATATTAATGTAGTATCACGTTAAAAAGCCGTAGTCA  
TCATTAAT

GTTATGGACAAGAGTAGATATCAAAATAAAACAAAATAAAATAGAGTAAGTGAAAGACAAATGGAGGAAAA  
AAAAAAAAAAAAAAAAAAAAAAAAAATAGTAAAAAGTAAAGGAGAACGATGATAACACTAATCACACCTC  
CGCATTTT

GCCCTTCTCTTTCAACCCATCTTTGCAACGAAAAAAAAAAAAAAAAATAAAAAATAAAAAGACCAAATAGTA  
AATAGTAACTTACATACATTAGTAAATGGTACACTCTTACACACTATCATCCTCATCGTATATTATAATAG  
ATATATAC

TCTGCCGCTTACGTAAAAACAGAACTCTGACCAGAAGAGATAAAAAACAAAAAAAAAATAAAGGACAGTAAA  
TATGAAAAATAAGATATTATTATATTAATTAATTAATTAATTAATTAATTAATTAATTAATTAATTAATTAAT  
AAAAAGAT

ATATTAACAACAACAAAAAATTAGTAAAAATACTATAAATGTTTGAATATGAAGATATATATGTAGGAAGAA  
TTTTTATTGAATATAGAAATTTAAAGAAATATTATTAAAAACCGGAAAATGAAAAAGAAGAGTTAAAAAA  
AAAAAAC

TCCCTTCGTTGGGTTAATTTTTTTTTTTTTTTTTTTGTTTATATGTTTTTTTTTTTTTTGCCAGGTATTG  
TTAGCGCCAGATAGCAAAAAATTTTATTAGGGATACTGAACACCGGGGAAGTTAACTGAGTATATCGGTT  
ATCATTAT

AAAAAAAAAAAAATAAAAAATAAAAAGACCAAATAGTAAATAGTAACTTACATACATTAGTAAATGGTACA  
CTCTTACACACTATCATCCTCATCGTATATTATAATAGATATATACAATACATGTTTTTACCCGGATCATA  
GAATTCTT

ATTGTTCCGATAACAAATACAATAGTGTTATTTAAAAAATAAAACTTATTTAAAAATAGTAATTTAAATTAT  
TATTTTATTTTAAATAAACTTTTTAATAATATTTATTACACGTGATTTAATATATCCTGTTTTTTTTTTCATC  
ATTCTCTT

TTATCGCGCAGGTGAGAGAGTCCTGGAATTTCCAGCGGATGGTGACGCGAGGCATCCGTAGTGCACAATAA  
AAAGTTAGTTTTTTCATTAACCGAAAAAATAAAATATATTAATGTTTGGGTTTCAACGTTTCC  
GTGGGTCT

TTTGAATATGAAGATATATATGTAGGAAGAATTTTTATTGAATATAGAAATTTAAAGAAATATTATTA  
ACCGAAAATGAAAAAGAAGAGTTAAAAAATAAAACGGAAGTAAAGATGTGAAAAAGAAGAG  
AAAAGTAG

TGTGAAAGCCCTTCTCTTTCAACCCATCTTTGCAACGAAAAAATAAAATAAAAAGACCA  
AATAGTAAATAGTAACTTACATACATTAGTAAATGGTACACTCTTACACACTATCATCCTCATCGTATATT  
ATAATAGA

ACATCCAATGGCGGGTAATAATTATAGTATTTTTCTTTCTATTTTATTTATTTTTTTTTTTTTTTTGGAT  
TTTCTAGAATAATCAATCAATGGTAAATAAACAAAAGTTGCTTCTGTTGTAAAAATACATCAAAGGGGCT  
AAAATATC

ATTTATATTTTTCATCTTTTTCTTTTTTTTTTTTTTTTACAATTCAGTAGTTTTATATAACTTCCATAAATGTAT  
TATTTTTTAAATACGACTATAATATACCTCTATACCCTTATTTATCTCTTTACCTTTGCTTTTAAAGCTAAA  
CAAATCTT

TTTTTTTTGCTTATTTTTTTCTTGCTAGGAATATACACAATAGCGTTCTTGGGATGAATAATAATAATATCA  
GTTTTCTTCTTTATATGAAAAATGAAAAAATAAAGTAAAAATTTTCGCTTTCTTTTCGGGGA  
GCAGCCAA

GAAAAGGAAGACAAAGACAATCAATAGAATGTATTATGTATGACATATAATAATAATAATTATAATAATAA  
TAATAATAGTAGTAGCAGTAATAATAATATTATTATAGTATATTAACAACAAAAAATTAGTAAAAATAC  
TATAAATG

CACCCGCGTAAAGAGTTTTTACCCCGAAAACAAATTTTTATGCTTGAAAAATAGCTAATAAAATGTTTTTA  
TTGTTCCGATAACAAATACAATAGTGTTATTTAAAAAATAAACTTATTTAAAAATAGTAATTTAAATTATT  
ATTTTATT

AAGCTGGTAAGAGCCTGACCGAGTAGTGAGTGGGTGACCATACGCGAAACTCAGGTGCTGCAATCTTTAT  
TTCTTTTTTTTTTTTTTTTTTTTTTTTTTTTTTTTTCTAGTTTCTTGGCTTCTATGCTAAATCCATAACTAAC  
CTACCATT

AGGAATGAAAAAAGTAAAGCATGGCAATGAATGACACAAGTGAATAGAAAAAGTAAAAATTA  
AAAAAATAAACTGATTTATACTCATGAAATCTTATTCGAGTTCATTCAAGACAAGCTTGACAT  
TGATCTAC

ATTAATAAATAAATAAATAAATAAATAAATAAATAAATAAATAAATAAATAAATAAATAAATAAATAAATAA  
CAAGCACAAAGACTTAGAGAGTAGTGATATCCCTTTTTTTTTCTACTATTTTTTTTTTTCCATTTTTT  
TCCTCCAA

AGCACAGGAAGAATTTCTTTTTTTTTTTGGCTTCTTCTGGTTCCGTTTTTTACGCGCACAAATCTAAAAAA  
GAAATAATTATAACCTAGTCTCGAAAATTTTCATCGATCCATTCGTTCTTTTTTTTCGATTTTTTTCAGATC  
AAAATTCT

ATGCATATATACCGTCATGAAGTAGCTTAACTTAAATAAAAGTTTTTTTTTTTTTAGAGTTACCAATATCGC  
AAACATGAAATGAGAATAAAAAAATAAAGCAGAAAAAATAAAGCATAACATGGAGAAAAAATAATAA  
ATAATTGA

TTCTTCTTTTTATTTTACGCGTCTCGCGTTTTATATATTAATAGTAATAATATTTAATAGTGTATGTTTGA  
AATTTTTATATGTCTTTATTTTCGCTAACGTAAAAATCCCTTCTTCTTTGTAGGGACGGGGGAGTGGTTAAC  
ATTGGGAG

AAGCACGAAATGTCCGTTATTAATAAATTGGGGAGTGAATCTTAAAAGCCCGAAAAGGAAATTCAAAATCTG  
TCTATTTATAGGCCGTGCGCTCTACGAAAACGCGAAATTATTCAAACGGAAAACGGAAAAAATCTAAAA  
AAAGAAAT

AATAGTGTATTATTAATAAATAAACTTATTTAAAAATAGTAATTTAAATTATTATTTTATTTAATAAACTT  
TTTAATAATATTTATTACACGTGATTTAATATATCCTGTTTTTTTTTTCATCATTCTCTTTCTTTCTTATGT  
TAACCTCG

AGAGTAGATATCAAAATAAAACAAAATAAAATAGAGTAAGTGAAAGACAAATGGAGGAAAAAAAAAAAA  
AAAAAAAAAAAAAAAAATAGTAAAAAGTGAAAGGAGAACGATGATAACACTAATCACACCTCCGCATTTTCA  
ACCAATGC

AAATATTAGCCTTCAAAGCCGCACACGTTTTCTTTTTCCGAAAAATGAAAAATTTTTCACTGAAAAAAAA  
AAAAAAAAAAGAAGAAATAGAAAGGTATAAATAGTTGAATAATTTGCCCTTCCGAGATCCAACAAGATTTTT  
GAGTGTTG

GAAGAAGCAAAAAAAAAAGAAAGACTCCGTTTAATCACTTTCAACCGCGGTTTATCCGGCCCCACCCATGCA  
TAACCCTAAATTATTAGATCACTTAGCACGTGAAAAAGAAACGTTTTTAATGTTTTTTTTTTTTTTTTCTT  
TTTTTTTT

CAGCTGATTCATTTATATTTTTCATCTTTTTCTTTTTTTTTTTTTTACAATTCAGTAGTTTTATATAACTTCCC  
ATAAATGTATTATTTTTTTAATACGACTATAATATACCTCTATACCCTTATTTATCTCTTTACCTTTGCTT  
TTAAGCTA

TTGAAGTACACACCCGCGTAAAGAGTTTTTACCCCGAAAACAAATTTTTATGCTTGAAAAATAGCTAATAA  
AATGTTTTTATTGTTTCGATAACAAATACAATAGTGTTATTAATAAATAAACTTATTTAAAAATAGTAAT  
TTAAATTA

AAAAAGAAACGAAGAAGCAAAAAAAAAAGAAAGACTCCGTTTAATCACTTTCAACCGCGGTTTATCCGGCCC  
CACCCATGCATAACCCTAAATTATTAGATCACTTAGCACGTGAAAAAGAAACGTTTTTAATGTTTTTTTTTT  
TTTTTTTT

ATATATTAGGGCATCCATAAAATAGATTAGGGCAGCTCTGCCATTTTTTTTCATAGCCGAAAGAAGAAAA  
CTGAAAAAAAAAATGATACGAAAAAACCGGAAACGACGCCTTTTGTGCGATTGTCGGGCATCGCAAGTT  
ACGACGCG

GTATTACGGGCCGTGCTCAAATTAGTTAGTTGGCTCTGCCTATACGCATATATGTATATATATATATATAT  
ATATGTATGTATGTGTATATGTATATGTACGTATACCTTACATCATCATCTTTCTTTTATATTCTCTCTAAT  
GCGCATTT

GTACAATTGAATAATATTATTGATTTTTTTTATTATTGTTCTTATTCTTTTTTTTATCATTCTATATAAAAT  
ATTATATGATTTAGTTTATCGTAAAAAATTAATAAATACAGAGGAAAGCAAAGTAAAACTTTTTCGGATA  
TTTTACAG

CTTTGCAACGAAAAAAAAAAAAAAAAAATAAAAAATAAAAAGACCAAATAGTAAATAGTAACTTACATACATT  
AGTAAATGGTACACTCTTACACACTATCATCCTCATCGTATATTATAATAGATATATAACAATACATGTTTT  
TACCCGGA

CTTTCACGCTCGGGAAGCTTTGTGAAAGCCCTTCTCTTTCAACCCATCTTTGCAACGAAAAAAAAAAAA  
AATAAAAAATAAAAAGACCAAATAGTAAATAGTAACTTACATACATTAGTAAATGGTACACTCTTACACAC  
TATCATCC

TAGAGCATAAGTTTTGTATAATTAAAATCTTCTAAACCTAATAAATATGTTTAATGAATGATTCAATATCA  
AAAAAGAAATCCATTGGGCCCTTAGTGCATTTTTATTTTTTTTTTTTTTTTTTTTTTTTTTTTTCTCTTTCTG  
AATTAGAG

GAAAAGGAAATTCAAAATCTGTCTATTTATAGGCCGTGCGCTCTACGAAAACGCGAAATTATTCAAACGG  
AAAACGGAAAAAATCTAAAAAAGAAATTAATTGAGAGATCTCACGAAATGCCGCGAGGAATGTTTCTC  
GAGGCTGA

CATCTTTTCTTTTTTTTTTTTTTTTACAATTAGTAGTTTTATATAACTTCCATAAATGTATTATTTTTTTA  
ATACGACTATAATATACCTCTATACCCTTATTTATCTCTTTACCTTTGCTTTTAAGCTAAACAAATCTTCA  
TTAACAGG

TGCTTGAAAAATAGCTAATAAAAATGTTTTTATTGTTTCGGATAACAAATACAATAGTGTATTAAAAAATAA  
AACTTATTTAAAAATAGTAATTTAAATTATTATTTTATTTTAATAAACTTTTTAATAATATTTATTACAG  
TGATTTAA

TTTTGATAGTATAATATGCCTTTGTCTGCCCGGACCCTGAATTACTGACACAAAATGAAGGGATCAGTGGC  
CCTGAAAAAAAAAAAAAAAAAATAAACGGCGCGGAGTAATTATGATTATGATTATGGTTATGATTATTA  
TTACAAC

ACGTAAAAACAGAACTCTGACCAGAAGAGATAAAAAACAAAAAAAAAATAAAGGACAGTAAATATGAAAAAT  
AAGATATTATTATATTAATTAATTAATTAATTAATTAACACTACGATGGGAGCGTTATGCCAAAAAAGATAA  
AATTCTGA

TTATTTATTTACTTTTACGACAACCTGGCCTTATCACTCGGCTCTCTAAAAGAAGTCATGTTCCCTTCGTTG  
GGTTAATTTTTTTTTTTTTTTTTTTTTTTGTTTATATGTTTTTTTTTTTTTTTCCAGGTATTGTTAGCGCCAGA  
TAGCAAAA

GAGCCTGACCGAGTAGTGTAGTGGGTGACCATACGCGAAACTCAGGTGCTGCAATCTTTATTTCTTTTTTT  
TTTTTTTTTTTTTTTTTTTTTTTTCTAGTTTCTTGGCTTCCCTATGCTAAATCCATAACTAACCTACCATTGC  
ATTCAGAA

CCACCCATGCATAACCTAAATTATTAGATCACTTAGCACGTGAAAAAGAAACGTTTTTAATGTTTTTTTTT  
TTTTTTTTCTTTTTCTTTTTTTGCGTTGGTGAAAATTTTTTCGCTTCCCTCGAGTATAATTATCTCATCTCA  
TCTTTCAT

AACCCATCTTTGCAACGAAAAAAAAAAAAAAAAAATAAAAAATAAAAAAGACCAAATAGTAAATAGTAACTTAC  
ATACATTAGTAAATGGTACACTCTTACACACTATCATCTCATCGTATATTATAATAGATATATACAATAC  
ATGTTTTT

TTATTCATAAGTACAATTGAATAATATTATTGATTTTTTTATTATTGTTCTTATTCTTTTTTTATCATTTT  
TATATAAATATTATATGATTTAGTTTATCGTAAAAAATTAAAAAATACAGAGGAAAGCAAAAGTAAAC  
TTTTCGGA

GGCATGACAAGCAAGCTATTTCGACAGTAAAAATGCACAGAACATTCAAAATTATACTTATAATATGACTC  
TTTTCTTTTATTGCAGTTGGTATTATATACATATATATATATATATATATATATATATGTTATGTTCCCGGAGACA  
ATGGTTTT

ACGGTAAGCTGTTCTTAATTGAACTTTGAAACATCCAATGGCGGGTAATAATTATAGTATTTTTCTTTTCT  
ATTTTATTTATTTTTTTTTTTTTTTTTTTGATTTTCTAGAATAATCAATCAATGGTAAATAAACAAAAGTTGC  
TTCTGTTG

ATTGACGTGTAAAAAAAAAAAAAAAAAAATGTTAATGGAACGACCGATCTAAAGAACCATATATAATGAAT  
GACTAAAAAAGCAAAATAGTTAAGAATCCAAGAAAGATACTAAGAAAAGGCGAAAAGAAAAAGAAAAAGT  
ATGTCCGC

ACTGGGCGACGAATTTTCGCGTTTTGATGAAGCACAGGAAGAATTTCTTTTTTTTTTTGGCTTCTTCTGGTT  
CCGTTTTTTTACGCGCACAAATCTAAAAAAGAAATAATTATAACCTAGTCTCGAAAATTTTCATCGATCCA  
TTCGTTCC

TTATTTTAAATAGAGCATAAGTTTTGTATAATTAATAATCTTCTAAACCTAATAAATATGTTTAAATGAATGA  
TTCAATATCAAAAAAAGAAATCCATTGGGCCCTTAGTGCATTTTTTATTTTTTTTTTTTTTTTTTTTTTTTTT  
TCTCTTTC

AACAAAAAATTAGTAAAAATACTATAAATGTTTGAATATGAAGATATATATGTAGGAAGAATTTTTATTGA  
ATATAGAAATTTAAAGAAATATTATTA AAAACCGGAAAATGAAAAAGAAGAGTTAAAAA AAAAAAACGG  
AACTAGTA

ATCCTTTGTAGAGGTTAATGCCGAAGTCTTCTATAATGTAATGTTCTAACAAAAATTTTTACTGATTTAT  
AAAACCTATATAGATAGATAGACACATATATATATCTATATATAGAAACACA ACTAAAGTTTACCATGTTT  
TATATAAT

ACCGATATTCCTAGTCTTCAAGTCACTATTATTTTTTTTTTTTATTCATAAGTACAATTGAATAATATTATT  
GATTTTTTTTATTATTGTTCTTATTCTTTTTTTTATCATTCTATATAAAATATTATATGATTTAGTTTATCG  
TAAAAAAA

CCTGTCAGTATAAAAAAATTTTCCGCAGGATATAGAAAAAAGAAATGAAATTATAGTAGCGGTTATTTTC  
CGTGGGGTGCTTTTTTACACCTGTACATCTTTTCCCTCCGTACATTTTTTTTTTATTTTTTTTTTTGGTTTTT  
TTTTTTCG

ATGTTTTTTTTTTTTTTTTCTTTTTCTTTTTTGCCTTGGTGAAAATTTTTTCGCTTCTCAGATATAAAT  
ATCTCATCTCATCTTTCATATAAGATAAGAAGTTTTATAAAAACCTTTTGCATCAAAATTTGTAGAATAT  
CTCTTTTT

ATTCAAATCATAACAGATATTTAGTTGAATAACTCTGTTTTTCTTCATTTCCATTTTTTTCTATTTACCCT  
TCTTCTTTTTTATTTTACGCGTCTCGCGTTTTATATATTAATAGTAATAATTTAATAGTGTATGTTTGAA  
ATTTTTAT

GTTTTGATGAAGCACAGGAAGAATTTCTTTTTTTTTTTGGCTTCTTCTGGTTCCGTTTTTTACGCGCACAAA  
TCTAAAAAAGAAATAATTATAACCTAGTCTCGAAAATTTTCATCGATCCATTCGTTCTTTTTTTTCGATT  
TTTTCAGA

AATGGAAAAAGCAAATAATGAATATAGGGGAACATAAATGTTATGGACAAGAGTAGATATCAAAATAAAA  
CAAAATAAATAGAGTAAGTGAAGACAAATGGAGGAAAAAAAAAAAAAAAAAAAAAAAAAAAAAAAAAATAGTA  
AAAAGTGA

TTATACAGGAAAGAAAGAGTTTTATTGATTTTAAAAACAATATAAATGAAAGAAAAAATGTGTTTTAGAT  
TAGGCTTATAAGATATGACCCATATCATAATTA AAAAAGCGATTTAGTTGTTCTTTTTAAAAA AAGAGA  
AAAAAAA

GGGTTAATTTTTTTTTTTTTTTTTTTTTGTTTATATGTTTTTTTTTTTTTTGCCAGGTATTGTTAGCGCCAG  
ATAGCAAAAAATTTTATTTCAGGATACTGAACACCGGGGAAGTTAACTGAGTATATCGGTTATCATTATAA  
ACACAAGA

ATTCGCATTTAGGAATGAAAAAAGTAAAGCATGGCAATGAATGACACAAGTGAATAGAAAAGTGAAAAA  
TTAAAAA AAAAAAAAAAAAAAAAAAAAACTGATTTATACTCATGAAAATCTTATTTCGAGTTCATTCAAGACA  
AGCTTGAC

AAGAATACACGTACACAAATATGCATATATACCGTCATGAAGTAGCTTAACTTAAATAAAAAGTTTTTTTTT  
TTTAGAGTTACCAATATCGCAAACATGAAAATGAGAATAAAAAA AAAAAAGCAGAAAAA AAAAAAGCATAA  
CATGGAGA



AATAAAGGTATTTTGAAAATTATAAAAAAAGTTTTAATAATATAGATTTGGTAAAATAAATAGGCGTATA  
TACACATTGTATACTGTTGATATTATCAAGTTTTTATTATTAAAGAGCTCTTTTTATTTTTTATTTATAGG  
GGAAAATG

GATCTGTTATAATATTAATACGCATTTTTTTTTATGTTTTCTCGTTTCTTTTCTTTTTTTTTGTTTTATATCT  
TACACATTTTTAATATACTAAAAGTAAAATAAAAAAATACGTACTGTTTCCCTTTGTTTTCTCCTCCTCTT  
TGCTTATA

AGAGGAGAAAAGAAAAGGAAGACAAAGACAATCAATAGAATGTATTATGTATGACATATAATAATAATAATT  
ATAATAATAATAATAATAGTAGTAGCAGTAATAATAATATTATTATAGTATATTAACAACAATAATAATA  
GTAAAAT

TTAGGCTTATAAGATATGACCCATATCATAATTAAAAAAAGCGATTTAGTTGTTCTTTTAAAAAAAAGAG  
AAAAAAAAAAAAAAAAAAAAAGGGAATGAGTTTGTACATACTATTATATTAATGTAGTATCACGTTAAAAA  
GCCGTAGT

ATATCGATCCCATACTATTGTCCCTGGATTTTGAGATGGGAAAAGTTTCAATGCGTTCTATCGTATAGTAT  
GATGTATTTCAAAAAAATGCGATAATCTTTAGTTGTGCGCACTTCGGAAGCCAAAAAAAAAAAAAAAAAAAA  
AAAAAGA

ACAAAATAAAATAGAGTAAGTGAAAGACAAATGGAGGAAAAAAAAAAAAAAAAAAAAAAAAAAAAAAAAAATAGT  
AAAAAGTGAAAGGAGAACGATGATAACACTAATCACACCTCCGCATTTTCAACCAATGCTGCAAGTTTCTC  
AACACTGG

GTTCTTAATTGAACTTTGAAACATCCAATGGCGGGTAATAATTATAGTATTTTTCTTTTCTATTTTATTTA  
TTTTTTTTTTTTTTTTTTGATTTTCTAGAATAATCAATCAATGGTAAATAAACAAAAGTTGCTTCTGTTGTA  
AAAAATAC

GAATTTCTTTTTTTTTTTGGCTTCTTCTGGTTCCGTTTTTTACGCGCACAAATCTAAAAAAGAAATAATTA  
TAACCTAGTCTCGAAAATTTTCATCGATCCATTCGTTCCTTTTTTTTCGATTTTTTTCAGATCAAAATCTTG  
TTTCTTTC

TTCATTAATATTATTTTAAATAGAGCATAAGTTTTGTATAATTAATAATCTTCTAAACCTAATAAATATGTT  
TAATGAATGATTCAATATCAAAAAAAGAAATCCATTGGGCCCTTAGTGCATTTTTATTTTTTTTTTTTTTTT  
TTTTTTTTT

AAGATATATATGTAGGAAGAATTTTTATTGAATATAGAAATTTAAAGAAATATTATTA AAAAACC GGAAAAT  
GAAAAAGAAGAGTTAAAAA AAAAAA AAAAAA C GGA ACTAGTAAAAGATGTGAAAAAAGAAGAGAAAAGTAGAA  
CGAGAACA

AGTTTTTTTTTTTTTAGAGTTACCAATATCGCAAACATGAAAATGAGAATAAAAAAAAAAAAAAGCAGAAAAA  
AAAAAGCATAACATGGAGAAAAAATAATAAATAATTGAGTTTAGTTGAGACGCCGGTCTTCGCCAGGCCA  
GGAATTGT

AGTTTTGAATTCCTTCCACCCATCATTCAAAATGCATATGCATACTATATTTGTCTAGTTTTTAATTATATA  
ATAATAAACAAGAAACAAAAATCGCATTATCGTTTAAATCTTATTTTTCTTTTTTACCTTTTTCTTGT  
GAAATTGC

CCGTGGGGTGCTTTTTTACACCTGTACATCTTTTCCCTCCGTACATTTTTTTTTATTTTTTTTTTTTTGGTTTT  
TTTTTTTCGATATTTTTCCCTCCGAAACTAGTTAGCACAATAATGCTGACTAAGGAACTTTTCATCTCAG  
AATTGATG

ATAGCTAATAAAATGTTTTTATTGTTTCGATAACAAATACAATAGTGTATTAAAAAATAAACTTATTTA  
AAAATAGTAATTTAAATTATTATTTTATTTTAATAAACTTTTTAATAATATTTATTACACGTGATTTAATA  
TATCCTGT

TTAGGTGCCTCCTGCTTTTTTTTTTTTTTCTGCTCTTATATCCGTTATATCCGAATGATTTTTATCGCTTGT  
TTAAAAAATACTTTCCCGATATATATATATAGTCTCCCTTTAAATTTGTTTCCGGTAAGTTTTTAACACCA  
ATAAATGA

ACATATGCTTACTCTATATTTTTCTCCAGTGCCTTCAAGCTCCGTATATATTATGTACTAGTTTTATTACAT  
TAAAGATACATAACTTTTTTTTTTTTTTTTTTTCAGTTCACTGAAATAAGAAAAGCGGGCGAGGTGAAAAACAA  
AAAAAAA

TGTCCGTTATTAATAAATTGGGGAGTGAATCTTAAAAGCCGAAAAGGAAATTCAAAATCTGTCTATTTATA  
GGCCGTCGCGCTCTACGAAAACGCGAAATTTATTCAAACGAAAACGGAAAAAATCTAAAAAAGAAATTA  
ATTGAGAG

TTTTTTTTTGCTGGATTTTATATTTTTTACAGCGAAAAGGACGGGAAGCTAAAAGATTAAAAATAAATATT  
GCAGATACCATATGTAATTTAGTAAAATATTTTTATAAAATATTATTATTTTCTTGTTCTTCAGTGATTTA  
TTGTAACC

AAAAGTAGGTAATGGAAAAAGCAAATAATGAATATAGGGGAACATAAATGTTATGGACAAGAGTAGATAT  
CAAAATAAAACAAAATAAAATAGAGTAAGTGAAGACAAATGGAGGAAAAAAAAAAAAAAAAAAAAAAAAAAAA  
AAAAATAG

CCTTTTTTCGGGTAGTTGAAGAGAAAAGAGGAAGAGAATAGAAAAAAAAAAAAAAGCGAAATTTTTACATCCT  
CTATTGTAATGTAATTTCTTTTTTTTTTATTAGGTATATATGTGAGATACAATTCTCGAAGTCATCGGGAAG  
CTTTACCA

CATTGATGAACTAGTGCCGCGCTTAAAAGTATAATGTTGCTCTATTATTTTTCAAAAATTCATACAAAAGA  
AAACGGGAATTAAGTAAGTATACAAAATATAATTATATTACGATGTTTCGAAATTCATATATGAATTTAAG  
CGGAGTCG

GATATAAGAAACATAACTATTACATACGAAAATGTGCATGTTATCTATATCCTTCTTTATATAGATGCTGT  
TAACCTCTTTTTTTTTTTTTTTGGGAAAATCAACTGTTAAACGCGACAGTAAAAGCAGCAAAACATTAATTTT  
GCTTCCAA

TCGCATTTTTTTTTTTTTTTGCTGGATTTTATATTTTTTACAGCGAAAAGGACGGGAAGCTAAAAGATTAAAA  
AATAAATATTGCAGATACCATATGTAATTTAGTAAAATATTTTTATAAAATATTATTATTTTCTTGTTCTT  
CAGTGATT

AAGTTTGAGCCAAGCCACGCGACGCTCCATACTGTATAGACCTTTATTATAAAAACATCTATTTCTTTATA  
TGTCCCTCTATCTTATTTTTCTTTTACTTTTTATTTGTATAATACGCGAAAAATTATAGAATCATTTATTAT  
CAAAAACA

ACACCTGTGAAGGTAAAGAAAGAGCATTCTCTTTTTTTTTTTTTTTTTTTTTTTTTTTACTTTCTTTACATTA  
AAAAAATATGAAGAGTGAATAGGTAAGTATAAGTATTATTTAATCATTACAATTTAGCTTCAATAGTAT  
AGAAGCGC

ATCCATTGGGCCCTTAGTGCATTTTTATTTTTTTTTTTTTTTTTTTTTTTTTTTCTCTTTCTGAATTAGAGT  
ACATCTCATCGCAGGTCTCTTTTTGCACGTTTTTGATGTTGCTTATGAGACGCTTTGCCTTTTTAACTTC  
TTCAGTAT

GTTTTGTATAATTAATAATCTTCTAAACCTAATAAATATGTTAATGAATGATTCAATATCAAAAAAGAAA  
TCCATTGGGCCCTTAGTGCATTTTTATTTTTTTTTTTTTTTTTTTTTTTTTTTCTCTTTCTGAATTAGAGTA  
CATCTCAT

CAAGTATCAAGTGCCGTTGGTATTATAGTTTATCAATTAATACGTAAATATATATATATATATATATATAT  
ATATATATGACTATAGTGGCATACTTCTCAATGGACTGTTGCTTCTATCATTTTTATACATGCGTTCAACTT  
TGAAGATT

AAAAAAAAAAAAAAAAAATGTTAATGGAACGACCGATCTAAAGAACCATATATAATGAATGACTAAAAAA  
AGCAAAATAGTTAAGAATCCAAGAAAGATACTAAGAAAAGGCGAAAAGAAAAAGAAAAGTATGTCCGCTA  
ACAAAGAT

CTTTTTATTTTTATTTATAGGGGAAAATGACCGATATTCCTAGTCTTCAAGTCACTATTATTTTTTTTT  
TATTCATAAGTACAATTGAATAATATTATTGATTTTTTTTATTATTGTTCTTATTCTTTTTTTTATCATTCT  
ATATAAAA

TTCCGCAGGATATAGAAAAAAGAAAATGAAATTATAGTAGCGGTTATTTCCGTGGGGTGCTTTTTTACAC  
CTGTACATCTTTTCCCTCCGTACATTTTTTTTTTTTTTTTTTTTTGGTTTTTTTTTTTTCGATATTTTCCCT  
CCGAAACT

TTCAACCCATCTTTGCAACGAAAAAAAAAAAAAAAAAATAAAAAATAAAAAGACCAAATAGTAAATAGTAACT  
TACATACATTAGTAAATGGTACACTCTTACACACTATCATCCTCATCGTATATTATAATAGATATATACAA  
TACATGTT

AAGTTATACTATTGACGTGTAAAAAAAAAAAAAAAAAATGTTAATGGAACGACCGATCTAAAGAACCATA  
TATAATGAATGACTAAAAAAGCAAAATAGTTAAGAATCCAAGAAAGATACTAAGAAAAGGCGAAAAGAAA  
AAGAAAAA

ATACAAAATTTTTCAATTTTTTTTTCCAAGATTCTTGTACGATTAATTATTTTTTTTTTTGCGTCCTACAGCG  
TGATGAAAATTTTCGCTGCTGCAAGATGAGCGGGAACGGGCGAAATGTGCACGCGCACAACCTTACGAAACG  
CGGATGAG

AGGTATCGGTGTTGTGAGAATTAGGTGCCTCCTGCTTTTTTTTTTTTTCTGCTCTTATATCCGTTATATCC  
GAATGATTTTTATCGCTTGTAAAAAATACTTTCCCGATATATATATATATAGTCTCCCTTTAAATTTGTTT  
CCGTAAG

TTTGTCTGCCCGACCTGAATTACTGACACAAAATGAAGGGATCAGTGGCCCTGAAAAAAAAAAAAAAAAA  
AATAAACGGCGCGCGGAGTAATTATGATTATGATTATGGTTATGATTATTATTACAACCTCACTATTCTAAG  
TCTATATC

AACATTCAAATTATACTTATAATATGACTCTTTTTCTTTTATTGCAGTTGGTATTATATACATATATATAT  
ATATATATATATGTATATGTTCCCGAGACAATGGTTTTATTTCCAAAAAAGTGAAGTAAGTTATTTTC  
TGTGTATA

TAATATGACTCTTTTTCTTTTATTGCAGTTGGTATTATATACATATATATATATATATATATATATATAT  
TCCCGAGACAATGGTTTTATTTCCAAAAAAGTGAAGTAAGTTATTTTCTGTGTATAAAAAAATAAAAG  
AAGCCAGA

TTTTTTTTGGCTTCTTCTGGTTCCGTTTTTTACGCGCACAAATCTAAAAAAGAAATAATTATAACCTAGTC  
TCGAAAATTTTCATCGATCCATTCGTTCCTTTTTTTTCGATTTTTTTTCAGATCAAATTCCTGTTTTCTTTCT  
TGTCTTAG

AACAGAAAATGCAAAGGACTAATAAATTGAATCATTTTTTATATCAGGTTTATATAGGTATACGTTCACTCT  
AATTAATAATTTATAGTTTACAGTAGTTTTTTTACAGTAGTTTTTTTTTTTTTTTTTTTTTTTTCAGTTCCATGATTTT  
TTTGTTC

CGGGCAAATCCTTTCACGCTCGGGAAGCTTTGTGAAAGCCCTTCTCTTTCAACCCATCTTTGCAACGAAAA  
AAAAAAAAAAAAATAAAAAATAAAAAGACCAAATAGTAAATAGTAACTTACATACATTAGTAAATGGTACAC  
TCTTACAC

GCATCCATAAAAAATAGATTAGGGCAGCTCTGCCATTTTTTTTTCATAGCCGAAAGAAGAAAAACTGAAAAAA  
AAATGATACGAAAAACCGGAAACGACGCTTTTTGTTGCGATTGTGCGGCATCGCAAGTTACGACGCGTT  
GTCCCTTG

AATCGATCAATTAACGCGTAAACGAAAAACAAAAAAAAAAAAAAAAATACGTAAATTAGGTCTTCATACGAGCG  
TTTTTTTTTTTTTTGAGGATCGTTTGCATGTCTAGCGCGGCAAGCGTGTTCACAGGCATTCGTTGTGTGTTT  
ATGTTTAG

ACAAAGACAATCAATAGAATGTATTATGTATGACATATAATAATAATAATTATAATAATAATAATAATAGT  
AGTAGCAGTAATAATAATATTATTATAGTATATTAACAACAAAAAATTAGTAAAAATACTATAAATGTT  
TGAATATG

TGATGTATTCAAAAAAATGCGATAATTCTTTAGTTGTTCGGCACTTCGGAAGCCAAAAAAAAAAAAAAAA  
AAAAAAGAAAAAAGAAAAGGGTGTCTAAGATGTACGGATCTTCATTGGGATGGAAAACAGGCAAGTAAA  
AGAATAG

AATCAATAAAAAACATTATATGCGTTTCGAACAAAATTAAAGAAAAAGAATAAATATAGATTA  
AGAAGAAATTAAGAATTTCTACTAAATCCAATTGTTATATATTTGTTAAATGCCAAAAAGTTTATAA  
AAAATTTA

TTTTTTTTTTGGGTCTGAAAATTTTTTTGCTTCTACTTAATTATAATTTTATATAATCATATATGGATCTG  
ATTCTTAAAAAATGAAAAAAGACAAAACAAACCATATAGGTAACAATTTCTCTTAGTGACATAAAAG  
AAGAAGGA

TCAATAGAATGTATTATGTATGACATATAATAATAATAATTATAATAATAATAATAATAGTAGTAGCAGTA  
ATAATAATATTATTATAGTATATTAACAACAAAAAATTAGTAAAAATACTATAAATGTTTGAATATGAA  
GATATATA

ACCGTCATGAAGTAGCTTAACTTAAATAAAAAGTTTTTTTTTTTTTAGAGTTACCAATATCGCAAACATGAAA  
ATGAGAATAAAAAAAAAAAGCAGAAAAAAAAAAGCATAACATGGAGAAAAAATAATAAATAATTGAGT  
TTAGTTGA

ACCCATATCCAGCTGATTCATTTATATTTTCATCTTTCTTTTTTTTTTTTTTACAATTCAGTAGTTTTAT  
ATAACTTCCCATAAATGTATTATTTTTTAATACGACTATAATATACCTCTATACCCTTATTTATCTCTTT  
ACCTTTGC

ATTATTATTATAATATATATAATTTAATAATCTTAATATTTATTATCATTGTTTCATATTTTTTTTTTATAA  
ATATTTATTTAAATAAAAAATATTAAAGAGTATTCAAAAAAGTCTTACTGTGGGTAATGGATATTTCTCA  
TGTTTGCC

ATCCTTTTCACGCTCGGGAAGCTTTGTGAAAGCCCTTCTCTTTCAACCCATCTTTGCAACGAAAAAAAAA  
AAAAATAAAAAATAAAAAGACCAATAGTAAATAGTAACTTACATACATTAGTAAATGGTACACTCTTACA  
CACTATCA

AATAAACTTAAAAAAGAACGTATAGAACTCTCTTTCAATGAATAGTAATCCAATTTTTTTTTTATTAAC  
TACAACGTTATGACTTTAAAAATTAATAATATGTTTATGAGTAGTAAGAAAAACAAAAGGAAACAAAAAC  
AAAAAAG

GCTCAAAGGGCTCGATAACGACATAGCATTATAGACACTGTGCAGCGTAAAGCTGACATATAAAGAAATTA  
CAAAAAAATTA  
AAAAAAAAAAAAAAAAAAAAA  
CAATCAAAAAAGACACAACTACAGAACAAGGAAATCTTT  
TTCTATGC

AACTGTAGTTAAGCTGGTAAGAGCCTGACCGAGTAGTGTAGTGGGTGACCATACGCGAACTCAGGTGCTG  
CAATCTTTATTTCTTTTTTTTTTTTTTTTTTTTTTTTTTTTTTTCTAGTTTCTTGGCTTCTATGCTAAATCC  
CATAACTA

ATGCGTTCTATCGTATAGTATGATGTATTCAAAAAAATGCGATAATTCTTTAGTTGTTCGGCACTTCGGA  
GCCAAAAAAAAAAAAAAAAAAAAA  
AAAAAAGAAAAGGGTGTCTAAGATGTACGGATCTTCATTGGG  
ATGGAAAA



CTCGCCGAGAAAACTTCAATTTAAGCTATTCTCCAAAAATCTTAGCGTATATTTTTTTTTCCAAAAGTGACA  
GGTGCCCCGGGTAACCCAGTTCCTCACTATTTTTTACTGCGGAAGCGGAAGCGGAAAATACGGAAACGCGC  
GGGAACAT

CGCGCGTTTTCTTTTTTTTTCTTGCTAACATTTTTCAACTTTAAAATGAAACGATGCATGAGTGATAGAGGC  
ATTGAACTTTAGTAAACAATAGAAATAACCATCGGAGTTATTATTTTTTTCTGCTTATTCTTTGGTCGCAA  
AAAAGTGT

AAAAAAAATGCGATAATTCTTTAGTTGTCTGGCACTTCGGAAGCCAAAAAAAAAAAAAAAAAAAAAAAAAGAA  
AAAAAGAAAAGGGTGTCTAAGATGTACGGATCTTCATTGGGATGGAAAACAGGCAAGTAAAAAGAATAGTA  
ATTATTAC

AGCCAAAAAAAAAAAAAAAAAAAAAAAAAGAAAAAGAAAAGGGTGTCTAAGATGTACGGATCTTCATTGG  
GATGGAAAACAGGCAAGTAAAAAGAATAGTAATTATTACAATGGAGAAGATAAGATAAAAGTTAGCGGCAAC  
AAATAAAG

TAATATATACCTTTAGATGAGCTATTGGTGATTCTGCATTTAGGAATGAAAAAAGTAAAGCATGGCAATGA  
ATGACACAAGTGAAATAGAAAAGTAAAAATTTTTAAAAAAAAAAAAAAAAAAAAAAAAAACTGATTTATACTCA  
TGAAAATC

TGCTTTTTCCCCTGTCTAGTATAAAAAAATTTTCCGCAGGATATAGAAAAAAGAAATGAAATTATAGTAG  
CGGTTATTTCCGTGGGGTGCTTTTTTACACCTGTACATCTTTTCCCTCCGTACATTTTTTTTTATTTTTTT  
TTTGGTTT

CACATTTGCTTTTTTTGATTTTATTTATTTACTTTTACGACAACCTGGCCTTATCACTCGGCTCTCTAAAAG  
AAGTCATGTTCCCTTCGTTGGGTTAATTTTTTTTTTTTTTTTTTTTTTTGTTTATATGTTTTTTTTTTTTTTGC  
CAGGTATT

ATAGAGTAAAGTAAAGACAAATGGAGGAAAAAAAAAAAAAAAAAAAAAAAAAATAGTAAAAAGTGAA  
AGGAGAACGATGATAACACTAATCACACCTCCGCATTTTCAACCAATGCTGCAAGTTTCTCAACACTGGCT  
AAATGTCT

GGAAATTAATACAGGTGTACACATACACGCACACATATATATATATATATATATATATATATATATATAG  
GAAGCGCGCATGTTAGTATATACGATTCGTTGGAAAGGGCCGTCCACCAAACGTGACTTGACGAGTTG  
ACAAATTG

TCTTTTTTTTATTTTTTTTTTTTTTTTTACTTTCTTTACATTAAAAAAATATGAAGAGTGTAATAGGTAAGT  
ATAAGTATTATTTAATCATTACAATTTAGCTTCAATAGTATAGAAGCGCACCACTTCATCAATGGCTTTAG  
CCACGTAT

ATAATATTATTGATTTTTTTTATTATTGTTCTTATTCTTTTTTTATCATTCTATATAAAATATTATATGAT  
TTAGTTTATCGTAAAAAATTAAAAAATACAGAGGAAAGCAAAGTAAAACTTTTTCGGATATTTTTACAGGG  
CGATCGCT

CACGAAAGCAAACCATAGAGATGAACTTAAGAAAAAGGGCCACGGGATTTTTTTTTTCGCGTTTTGGCGTT  
TTCATATCAAAAAAAAAAACCATATTAACATCTGTACATTATTATTAACATAACATCCGTACACAAAAGG  
TTTTCCAA

AATAAAGTACAGCTCTAGGTCTATAAAAAAAAAAATGGTTAAAGAAAAAATATACAGGTTTGTATATAG  
AATCATTAATTAAAAAGATAATAGTATAAACACATCAGATAAAACAAAAGTTTGCCCAATAAAATTATATT  
TTCCATCA

TCCTGGAATTTCCAGCGGATGGTGACGCGAGGCATCCGTAGTGCACAATAAAAAGTTAGTTTTTTCATTAAC  
CGAAAAAAAAAAAAAAAAATAAATATATTAATGTTTGGGTTTCAACGTTTCCGTGGGTCTGGGTCCACAACA  
GAAAAC TG

GCAAAGGACTAATAACTTGAATCATTATATATCAGGTTTATATAGGTATACGTTTCAGTCTAATTAATAAT  
TTATAGTTTACAGTAGTTTTTACAGTAGTTTTTTTTTTTTTTTTTTTTTTTTTTTTCAGTTCCATGATTTTTTTGTTCCCTT  
TGATTTCGT

GTCCGGGCAAATCCTTTTCAGCTCGGGAAGCTTTGTGAAAGCCCTTCTCTTTCAACCCATCTTTGCAACGA  
AAAAAAAAAAAAAAAAATAAAAAATAAAAAAGACCAATAGTAAATAGTAACTTACATACATTAGTAAATGGTA  
CACTCTTA

ATTATTAGATCACTTAGCACGTGAAAAAGAAACGTTTTTAATGTTTTTTTTTTTTTTTTTTTTCTTTTTCTTTTT  
TTGCGTTGGTGAAAATTTTTTCGCTTCCCTCGAGTATAATTATCTCATCTCATCTTTCATATAAGATAAGAA  
GTTTTATA

GCGATTTAGTTGTTCTTTTTAAAAAAAAAGAGAAAAAAAAAAAAAAAAAAAAAAAAAGGGAATGAGTTTGTACATA  
CTATTATATTAATGTAGTATCACGTTAAAAAGCCGTAGTCATCATTAAATCGTCCAAAAGTCTTCTACCGGA  
CCAGATGT

GCCGAGAAAACTTCAATTTAAGCTATTCTCCAAAATCTTAGCGTATATTTTTTTTTCCAAAGTGACAGGT  
GCCCCGGGTAACCCAGTTCCCTCACTATTTTTTACTGCGGAAGCGGAAGCGGAAAATACGGAAACGCGCGGG  
AACATACA

TTATCCGGCCCCACCCATGCATAACCCATAAATTATTAGATCACTTAGCACGTGAAAAAGAAACGTTTTTAA  
TGTTTTTTTTTTTTTTTTTTTTTTTTTTTTTTTTGCGTTGGTGAAAATTTTTTCGCTTCCCTCGAGTATAATTA  
TCTCATCT

CAAAACCCGACATTGATGAACTAGTGCCGCGCTTAAAAGTATAATGTTGCTCTATTATTTTTCAAAAATTC  
ATACAAAAGAAAACGGGAATTAAGTAAGTATACAAAATATAATTATATTACGATGTTTCGAAATTCATATA  
TGAATTTA

CTACCTCCGTTAACAAGACATTAGATTAGTGATCACACCCAATTTTTAATTTAGTAACCCAAAACCTAAATA  
AGTATTTACTCAACTTTTTTTTTAAAAAAAAAAAAACTTAATTGAATTTTGCTCGCGATCTTTAGGTCCGGAG  
TTTTTCGTT

CGTATTTCTCGCCGAGAAAACTTCAATTTAAGCTATTCTCCAAAATCTTAGCGTATATTTTTTTTTTCCAA  
AGTGACAGGTGCCCCGGGTAACCCAGTTCCCTCACTATTTTTTACTGCGGAAGCGGAAGCGGAAAATACGGA  
AACGCGCG

AACTCCGCGAGGTTTCAGGAACCTGAAACAAAATCAATAAAAAACATTATATGCGTTTTCGAACAAAATTAAG  
AAAAAGAATAAATATAGATTAATAAAAAAAAAAAGAAGAAATTAAGAATTTCTACTAAATCCCAATTGTTAT  
ATATTTGT

GTGTTTTAGATTAGGCTTATAAGATATGACCCATATCATAATTAATAAAAAAGCGATTTAGTTGTTCTTTTTAA  
AAAAAAGAGAAAAAAAAAAAAAAAAAAAAAAAAAGGGAATGAGTTTGTACATACTATTATATTAATGTAGTATC  
ACGTTAAA

ACACTTGTCTTTATGAAAGAGTGAAAAATGGTGGGGAGTAAGTTATACTATTGACGTGTAAAAAAAAAAAA  
AAAAAAATGTTAATGGAACGACCGATCTAAAGAACCATATATAATGAATGACTAAAAAAGCAAAATAGT  
TAAGAATC

AGCAATCTCATCGCGAAATTTTTCTCAAATTTTTTCAGTTAAAAAAAAAAAAAGCACGTGCTCAAAAATGTT  
TTTAGAAAATCATTTATTTAAGATAGGAAAAATGCAATTAATCATTGAATCAATATGTTCCACCACTTAAAT  
TACCCACT

TTTTTTTTCCAAAGTGACAGGTGCCCCGGGTAACCCAGTTCCCTCACTATTTTTTACTGCGGAAGCGGAAGCG  
GAAAATACGGAAACGCGCGGGAACATACAAAACATACAAAATATACCTTTCTCACACAAGAAATATATGCT  
ACTTGCAA

CTTCAAAGCCGCACACGTTTCTTTTTCCGAAAAATGAAAAATTTTTCACTGAAAAAAAAAAAAAAAAAAG  
AAGAAATAGAAAGGTATAAATAGTTGAATAATTTGCCCTTCGAGATCCAACAAGATTTTTGAGTGTTGGG  
ACCCTTGG

CAAGTGTATCGATCTGTTATAATATTAATACGCATTTTTTTTTATGTTTTCTCGTTTCTTTTTCTTTTTTTG  
TTTTATATCTTACACATTTTTAATATACTAAAAGTAAAATAAAAAATACGTACTGTTTCCCTTTGTTTTCT  
TCCTCCTC

ACCCGCAGGTGAAAAATTTAGCAAAGTTACACTTTTTTTTTTCATTTTTTTTTTTCTTTTCTCCTCCATCTA  
ATTTACCTGCGGTTACCGGCGGAATAACTCGCGCACCATTTCTCTGTCTCGGGCCTCGCGTTCCTTTTT  
TCGACTCG

TAAAATGATATTGTGGTTAATCTAAATTTATATATATATATATATATACATATATATATAGAAATCTATTG  
TTATACACAAAAATACTTATTTTTTAATATAGATGGCTGCAGATAAAGTAATAGTTTTATATATAGGTATA  
TTTACTGC

TCGGGCATTTAAAATCTTGGATCGATAACTTAACTGGGTGTAATAAAATATATAAAGATATAAAATAGATA  
TATATATATAAAACGAACTTTATCAAGAAGAACTGCAAAATGAAGCGTACTCTCAAATCCTCGAAAACGAAA  
AACACTCC

GGTGAGAGAGTCTTGAATTTCCAGCGGATGGTGACGCGAGGCATCCGTAGTGCACAATAAAAAGTTAGTT  
TTTCATTAACCGAAAAAATAAATATATTAATGTTTGGGTTTCAACGTTTCCGTGGGTCTGG  
GTCCACAA

TAAGAAGGTAACATGAGAAAACAGACAAGAAAAAGAAACAAATAATATAGACTGATAGAAAAAATACTGC  
TTACTACCGCCGTATAATATATATATATATATATATATTTACATAGATGATTGCATAGTGTTTAAAAAGCT  
TTCTAGG

CATTTGCGGCATCTTATAACCCACACACCGCATTTAGGACCCGTTTTTTTTCTTTTTTTTTTTGTTGAAAA  
AATTCAACAGTTTCTTATTTTTCTTTTCATTTTTTTTTGCCTTGCCTTCGTTTCGAGAATTTCTTTTT  
CTTTTTCT

AAAAGTTTCAATGCGTTCTATCGTATAGTATGATGATTCAAAAAAATGCGATAATTTCTTTAGTTGTCGG  
CACTTCGGAAGCCAAAAAATAAATATATATATATATATATATATATATATATATATATATATATATATAT  
CTTCATTG

TAAAAATTGGGGAGTGAATCTTAAAAGCCGAAAAGGAAATTCAAAATCTGTCTATTTATAGGCCGTGCGG  
CTCTACGAAAACGCGAAATTTTCAAACGAAAACGAAAAAATCTAAAAAAGAAATTAATTGAGAGAT  
CTCACGGA

TCCCAATAGCACATCAACCAACCCATATTCAGCTGATTCATTTATATTTTCTTTTTTTTTTTTTTTTT  
TTACAATTCAGTAGTTTTTATAACTTCCATAAATGTATTATTTTTTTAATACGACTATAATATACCTCT  
ATACCCTT

TGGATTTTATATTTTTTACAGCGAAAAGGACGGGAAGCTAAAAGATTAAAAATAAATATTGCAGATACCA  
TATGTAATTTAGTAAAATATTTTTATAAATATTATTATTTTCTTGTCTTCAGTGATTTATTGTAACCAT  
GGAGAAAT

GACCGACGGTACCCGCAGGTGAAAAATTTAGCAAAGTTACACTTTTTTTTTTCATTTTTTTTTTTCTTTTCT  
CCTCCATCTAATTTACCTGCGGTTACCGGCGGAATAACTCGCGCACCATTTCTCTGTCTCGGGCCTCGCG  
TTCTCTTT

CGGTACACATACATACATATATATATATAAATATATATATATATAAAGACATATACAGATTTTTTTTTTT  
TCGCGTACTAAAGTACAGAACAAGAAAATAAGAAAAGAAGCGATCATTGAACTACTGTGACTTGCCAAT  
ATGGTCTA



CTGAAGCGTCATCATCTATCTGTATTTTTAATGCAATCATAGTATAAAAAATTTTTAACCAAATTCAAAAAT  
TATAATATTTTTAAAAGTTTATGCTTTTGTCTTTTATATTCAAGTCATTTGGCCATTATTACGCTTTTTTT  
TTTATTAG

TAGGAAAAATCAACGAGCCAAAAAAAAAAAAACGGAACCGTTCGGCATGTATATATTTCACTATTTTCATAT  
ACGCGTTTGCACAATATACTCTATCTTATCCGTATCTATACGAGCCGGTTGCTGCACCTTACATGTCATAG  
TTGAAATC

TACTCCCTACAAACATGTGCGCGTTTGTGACAAAAACATAAATAAAAAATAATAAAAAAGTCAAGTGA  
AAAGCACTGAAATCTAAAAATAAATACATATACATATATATATATATACCTATTTTCGTTTCCGCATAG  
AAGAAATT

TCTTTGTTATATGGGTACAAGATATAAGAAACATAACTATTACATACGAAAATGTGCATGTTATCTATATC  
CTTCTTTATATAGATGCTGTTAACTTCTTTTTTTTTTTTTTTGGGAAAATCAACTGTTAAACGCGACAGTAA  
AGCAGCAA

GCACTTCGGAAGCCAAAAAAAAAAAAAAAAAAAAAGAAAAAGAAAAGGGTGTCTAAGATGTACGGA  
TCTTCATTGGGATGGAAAACAGGCAAGTAAAAAGAATAGTAATTATTACAATGGAGAAGATAAGATAAAGT  
TAGCGGCA

CCGTCCGATCAACTGTAGTTAAGCTGGTAAGAGCCTGACCGAGTAGTGTAGTGGGTGACCATACGCGAAAC  
TCAGGTGCTGCAATCTTTATTTCTTTTTTTTTTTTTTTTTTTTTTTTTTTTTCTAGTTTCTTGGCTTCCTA  
TGCTAAAT

TAATTTTTTCATGACTGACGTTTTTTCTTCATTTTAATTATCATAGTATTTGTTTGAAAAAAAAAAAAAAAA  
ATTTCCCTTATCAATGATATCCTTACGATTATATAAATTCCTTACCTAAACCTATTATTTGTGTACATATA  
TCAGAGTA

TAGTAAAAATACTATAAATGTTTGAATATGAAGATATATATGTAGGAAGAATTTTTATTGAATATAGAAAT  
TTAAAGAAATATTATTA AAAACCGGAAAATGAAAAAGAAGAGTTAAAAAAAAAAAAAAAAACGGAAGTAA  
AGATGTGA

TTTTTTTTTTTTTACAATTCAGTAGTTTTATATAACTTCCATAAATGTATTATTTTTTTAATACGACTAT  
AATATACCTCTATACCCTTATTTATCTCTTTACCTTTGCTTTTAAGCTAAACAAATCTTCATTAACAGGTA  
TTATATTA

AATAAAACAAAAATAATAAAAAAGTCAAGTAAAAGCACTGAAATCTAAAAATAAATACATATACATATAT  
ATATATATATACCTATTTTCGTTTCCGCATAGAAGAAATTGGAGGCAACTAGTTGCAGGTTGTTTTCTTAG  
CCCATTTG

TATAGAAAAAAGAAATGAAATTATAGTAGCGGTTATTTCCGTGGGGTGCTTTTTTACACCTGTACATCT  
TTTCCCTCCGTACATTTTTTTTTATTTTTTTTTTTTTTTGGTTTTTTTTTTTTCGATATTTTTCCCTCCGAAACTAG  
TTAGCACA

ATTA AAATCTTCTAAACCTAATAAATATGTTAATGAATGATTCAATATCAAAAAAGAAATCCATTGGGC  
CCTTAGTGCATTTTTATTTTTTTTTTTTTTTTTTTTTTTTTCTCTTTCTGAATTAGAGTACATCTCATCG  
CAGGGTCT

AGTTGAATATTTGAAGTACACACCCGCGTAAAGAGTTTTTACCCCGAAAACAAATTTTTATGCTTGAAAA  
TAGCTAATAAAATGTTTTTATTGTTTCGATAACAAATACAATAGTGTTATTA AAAAATAAACTTATTTAA  
AAATAGTA

GGTTTTTTTTTTTTGTTTTGTCAAGAGCCGCGCACAAAATATGGTATTATTATAGAAAAGTTGGACTTAAAA  
GCTTGAAAAGCTTAGATTTTATATTCATATGCTGGTATATATGTACGACTAAATAATATAAATTTGATTA  
TAACAATC

CAGCTTTCTTTTTTCAAAAACTTTTTCTATTATTAGATTAGATTTTTTTTTAGTGTGTATATTAATAACG  
TAAAATTTCTTTATCAACGACTTGTAGTATTCTTTTACTTTTTTTTTTACATATGCAACGTTATATTC  
TTTTTTAA

TGATTTTTTTATTATTGTTCTTATTCTTTTTTTATCATTCTATATAAAATATTATATGATTTAGTTTATC  
GTAAAAAATTAAAAAATACAGAGGAAAGCAAAGTAAAACTTTTTCGGATATTTTACAGGGCGATCGCTAA  
GCTTAATC

GATGTGACACAACGTGCAGCATCTTTTTTCTACCATTGAATATATATATAGTAATTACGGCAACCGTTT  
ATATAAAAATTCAAAAGATTAAATATTTTAATATATTAGTGTCTGGTTTAAAAGTCATACTTCTCTAATCA  
CTACCGTG

AGGCCGTGCGCTCTACGAAAACGCGAAATTATTCAAACGGAAAACGGAAAAAATCTAAAAAAGAAATT  
AATTGAGAGATCTCACGAAATGCCGCGAGGAATGTTTCTCGAGGCTGAGCGGCGTGGTCTGTGCAAAAA  
ATGGCAAT

TCAGCGTAGTCCCAGAAAAAATCATCACTGGAAATGTAAGATGAATTCAGTATCAAGTGCCGTTGGT  
ATTATAGTTTATCAATTAATACGTAAATATATATATATATATATATATATATATATATATATATATGACTATAGTGGCA  
TACTTCTC

TAATTTTTTATTAAGTTTTGATCAACTTAGGATTTTCTATTTTTATTTTTGTTTATTATATTAAGTGTTCAT  
TATTTTAAGTAGTTATATATTATATAATAACAACCCGATTAGACAACTTCATAAGTTTTTTCGGGTGGGAC  
GGTATCAA

AGCTATTTCTCACATTTGCTTTTTTTGATTTTTATTTATTTACTTTTACGACAACCTGGCCTTATCACTCGGC  
TCTCTAAAAGAAGTCATGTTCCCTTCGTTGGGTTAATTTTTTTTTTTTTTTTTTTTTTTTTTTTTTTTTTTTT  
TTTTTTTTT

TCTTTCACCCATCATTCAAATGCATATGCATACTATATTTGTCTAGTTTTTAATTATATAATAATAATAA  
CAGAAACAAAAATCGCATTTCATCGTTTAACTTTATTTTTCTTTTTTACCTTTTTCTTGTGAAATTGCCA  
AGCGCTTA

TTCAAATTCCTTAGAATATGCATCCACATTTATATACATATATATATATATATATATATATATATTATAACTTCCAA  
AAAGGAGATTGGACAATTTATATCTATAAGGCATTAATATTTAACTATTTACAAGCACTAGTGGTAAATTC  
ATGGCGTC

AGAGCATTTCTCTTTTTTTTTATTTTTTTTTTTTTTTACTTTCTTTACATTAAAAAAATATGAAGAGTGTA  
ATAGGTAAGTATAAGTATTATTTAATCATTACAATTTAGCTTCAATAGTATAGAAGCGCACCACTTCATCA  
ATGGCTTT

GCTATTGGTGATTGCGATTTAGGAATGAAAAAAGTAAAGCATGGCAATGAATGACACAAGTGAAATAGAA  
AAGTGAAAAATTAAAAAAAAAAAAAAAAAAAAAAAAAAACTGATTTATACTCATGAAATCTTATTCGAGTTC  
ATTCAGA

TCTTAGCGTATATTTTTTTTTTCAAAGTGACAGGTGCCCGGGTAACCCAGTTCCTCACTATTTTTTTACTGC  
GGAAGCGGAAGCGGAAAATACGGAACGCGCGGGAACATACAAAACATACAAAATATACCTTTCTCACACA  
AGAAATAT

TATTACTCACCTGCCCCACGCTCAAAGGGCTCGATAACGACATAGCATTATAGACACTGTGCAGCGTAAA  
GCTGACATATAAAGAAATTACAAAAAATTAAAAAAAAAAAAAAAAAAACAATCAAAAAAGACACACAAC  
ACAGAACA

CATAGTATTTGTTTGAAAAAATTTCCCTTATCAATGATATCCTTACGATTATATAAATTC  
CTTACCTAAACCTATTATTTGTGTACATATATCAGAGTATTATTACATATATAACCTTTTTCTCTAAAACA  
GGAAAAA

AACATTATATGCGTTTCGAACAAAATTAAAGAAAAAGAATAAATATAGATTAAAAAAAAAAGAAGAAATT  
AAAAGAATTTCTACTAAATCCCAATTGTTATATATTTGTTAAATGCCAAAAAGTTTATAAAAAATTTAGA  
ATGTATAA

GCGGGTAATAATTATAGTATTTTTCTTTTCTATTTTATTTATTTTTTTTTTTTTTTTTTTGATTTTCTAGAAT  
AATCAATCAATGGTAAATAAACAAAAGTTGCTTCTGTTGTAAAAAATACATCAAAGGGGCTAAAATATCAA  
TATACGTT

AAGAGTTTTTACCCCGAAAACAAATTTTTATGCTTGAAAAATAGCTAATAAAATGTTTTTATTGTTCCGAT  
AACAAATACAATAGTGTATTAAAAAATAAACTTATTTAAAAATAGTAATTTAAATTATTATTTATTTT  
AATAAACT

GGTGGGGAGTAAGTTATACTATTGACGTGTAAAAAAAAAAAAAAAAAATGTTAATGGAACGACCGATCTA  
AAGAACCATATATAATGAATGACTAAAAAAGCAAATAGTTAAGAATCCAAGAAAGATACTAAGAAAAGG  
CGAAAAGA

AAGGATTGCTAACAGAAAATGCAAAGGACTAATAACTTGAATCATTTTTATATCAGGTTTATATAGGTATA  
CGTTCAGTCTAATTAATAATTTATAGTTTACAGTAGTTTTTTTACAGTAGTTTTTTTTTTTTTTTTTTCAGTT  
CCATGATT

CTTTTCTTTTATTGTCAGTTGGTATTATATACATATATATATATATATATATATATATATATGTATATGTTCCCGAGAC  
AATGGTTTTATTTCCAAAAAAGTGTAAAGTAAGTTATTTTCTGTGTATAAAAAAATAAAGAAGCCAGATG  
AAGTGCCA

AATATTAATACGCATTTTTTTTTATGTTTTCTGTTTCTTTTCTTTTTTTTTGTTTTATATCTTACACATTTT  
TAATATACTAAAAGTAAATAAAAAAATACGTACTGTTTCCCTTTGTTTTCTCCTCCTCTTTGCTTATATC  
TCCACTGC

GCAACAATATTTTTGCTTATTTTTGATATCCTGAAATCCTTTTTTTTTTTTTTTTTTTTTTTTTTTTTTTTT  
TGATTTTCATTTTCGTTTTTTTTTTTTTTGAACATTATATATTGTATTGTTTTCTCCCTGTAGCGAGAATAATT  
GATTCTTT

AGAAATAGCAATAACACGCGTGCAGAAGATTGAGAAGACTACTACGTATTTTTTTTTTATATGCATCCTTTT  
TTCCACATATGTATGCGCGGTGCGCGCGCCATTAAAGATTTTTTTCTTAGCTCTTTTTCTTTTTCTTT  
TTTCTTTT

AAAAGCGTAAGCAATGGTGTAGATACTTCTTATATAGACGTTATTATTACTATTATTATTATTATTATTATT  
TATTATTATTATTATTATTATTATTATTATTATTATTATTATTATTATTATTATTATTATTATTATTATT  
TTATTATT

ATAACACGCGTGCAGAAGATTGAGAAGACTACTACGTATTTTTTTTTTATATGCATCCTTTTTTCCACATAT  
GTATGCGCGGTGCGCGCGCCATTAAAGATTTTTTTCTTAGCTCTTTTTCTTTTTCTTTTTCTTTTCCA  
CTGAGATG

GCAATGGTGTAGATACTTCTTATATAGACGTTATTATTACTATTATTATTATTATTATTATTATTATTATT  
ATTATTATTATTATTATTATTATTATTATTATTATTATTATTATTATTATTATTATTATTATTATTATT  
TATTATAT

TATATAGACGTTATTATTACTATTATTATTATTATTATTATTATTATTATTATTATTATTATTATTATTATT  
TATTATTATTATTATTATTATTATTATTATTATTATTATTATTATTATTATTATTATTATTATTATTAT  
TTGTAATT

TTTTGCTTATTTTTGATATCCTGAAATCCTTTTTTTTTTTTTTTTTTTTTTTTTTTTTTTTTTTGATTTTCATT  
TCGTTTTTTTTTTTTGAACATTATATATTGTATTGTTTTCTCCCTGTAGCGAGAATAATTGATTCCTTTCT  
CCTTTCCC



TTTAGATGTTAGCGATGCTATATCATCTGAGATGAGATGAGATGAGATGTTTATTATGATCCATTTCTTTT  
CTTTTTTATTTTTTTTTTTTTTTTTTTTTTTTTTTTTTTTTTTTCATTTTTCAACGCGGGTAATAGAGAATACATCCACTGTCC  
GGTAAAT

GGCAATGAAAATATAACTTTTTTAGATGTTAGCGATGCTATATCATCTGAGATGAGATGAGATGAGATGTT  
TATTATGATCCATTTCTTTTCTTTTTTATTTTTTTTTTTTTTTTTTTTTTTTTTTTTTTTTTTTCATTTTTCAACGCGGGTAAT  
AGAGAATA

TATCATCTGAGATGAGATGAGATGAGATGTTTATTATGATCCATTTCTTTTCTTTTTTATTTTTTTTTTTT  
TTTTTTTTTTTTTTCATTTTTCAACGCGGGTAATAGAGAATACATCCACTGTCCGGGTAAATTATGTTACAGTT  
AGCGCTTA

TGAAATCCTTTTTTTTTTTTTTTTTTTTTTTTTTTTTTTTTTTGATTTTCAATTCGTTTTTTTTTTTTTGAACA  
TTATATATTGTATTGTTTTCTCCCTGTAGCGAGAATAATTGATTCTTTCTCCTTTCCCCCTAAATACTCA  
ACAGTACT

TGAGAAGACTACTACGTATTTTTTTTTTATATGCATCCTTTTTTCCACATATGTATGCGCGGTGCGCGCGCG  
CCATTAAGAGATTTTTTTCTTAGCTCTTTTTCTTTTTCTTTTTCTTTCCACTGAGATGCGTTCTTCGGTA  
TATAGTGA

ACATACCCATCTCAAAATTAAGAAATAGCAATAACACGCGTGCAGAAGATTGAGAAGACTACTACGTATTT  
TTTTTATATGCATCCTTTTTTCCACATATGTATGCGCGGTGCGCGCGGCCATTAAGAGATTTTTTTCTT  
AGCTCTTT

GTTTTTTGTTTTCGCTTTTTTTATTTTTTGTTCCTAATTTTTTTTTTTTTTTTTTACATTTTATTAGCTATAAC  
TTGGCGCAAGGATATTTTATATACCGGATATAATAGATAATTAAGACTACTAATTAATAATGATGTAAT  
ATGGTAAT

CCATTTCTTTTCTTTTTTATTTTTTTTTTTTTTTTTTTTTTTTTTTTTTTTTTTTCATTTTTCAACGCGGGTAATAGAGAATAC  
ATCCACTGTCCGGGTAAATTATGTTACAGTTAGCGCTTAATGTTCACTTCACAGTATTATGAGCTGTTTTT  
GTAATAAA

TTATTATGATCCATTTCTTTTCTTTTTTATTTTTTTTTTTTTTTTTTTTTTTTTTTTTTTTTTTTCATTTTTCAACGCGGGTAA  
TAGAGAATACATCCACTGTCCGGGTAAATTATGTTACAGTTAGCGCTTAATGTTCACTTCACAGTATTATG  
AGCTGTTT

ACTACGTATTTTTTTTTTATATGCATCCTTTTTTCCACATATGTATGCGCGGTGCGCGCGGCCATTAAG  
ATTTTTTTCTTAGCTCTTTTTCTTTTTCTTTTTCTTTCCACTGAGATGCGTTCTTCGGTATATAGTGAGA  
ACACTTAC

AAATATAATTGGCAATGAAAATATAACTTTTTTAGATGTTAGCGATGCTATATCATCTGAGATGAGATGAG  
ATGAGATGTTTATTATGATCCATTTCTTTTCTTTTTTATTTTTTTTTTTTTTTTTTTTTTTTTTTTTTTTTTTTCATTTTTCAA  
CGCGGGTA

ATTATTATTATTATTATTATTATTATTATTATTATTATTATTATTATTATTATTATTATTATTATTATTATTATTATTATTATT  
TATTATTATTATTATTATTATTATTATATGACATTAATTACTTGTAATTATGTTATAACAGTGAAATAAAT  
AAAATATC

ATTTTCCTCATTGGTCTTTGTACCTATAATTGTTTCATATTATATATACGTTTGTAACAAATCGATAAATAG  
CAACAATATTTTTGCTTATTTTGATATCCTGAAATCCTTTTTTTTTTTTTTTTTTTTTTTTTTTTTTTTTTTT  
GATTTTCAT

TTGGTCTTTGTACCTATAATTGTTTCATATTATATATACGTTTGTAACAAATCGATAAATAGCAACAATATT  
TTTGCTTATTTTGATATCCTGAAATCCTTTTTTTTTTTTTTTTTTTTTTTTTTTTTTTTTTTT  
CGTTTTTT

GAGATCTTTTGGTCAAACAATCTAGATTGTTCTGAAGATCAAATAATATATATATATATATATATATATATA  
TATATATGTTTATACACTTAACTTACGTACAAAAATATAGATTTTCGAAACGAATCAGTTGCTCTTAGCCTG  
CACATCTA

GATTGGACTAGGCATCACCCAGACTTTACTTTTTTCGGCATACATATCTATTTATATATAGTTTAATACGTA  
AATACAAATATATATATACTGTAAATTTTAATCATTAAGCTTTTCTTTTTTTTTTTGTTTCACGCTTTCACCC  
TGTGAGGC

GAGACGAGTGTCACTTCTGAACATACCCATCTCAAATAAAGAAATAGCAATAACACGCGTGCAGAAGATT  
GAGAAGACTACTACGTATTTTTTTTTTATATGCATCCTTTTTTCCACATATGTATGCGCGGTGCGCGCGC  
CATTAATA

TTTTTTTTTTTTTTTTTTTTTTTTTTTTTTTTTTTTGATTTTCAATTCGTTTTTTTTTTTTTTGAACATTATATATTG  
TATTGTTTTCTCCCTGTAGCGAGAATAATTGATTCTTCTCCTTTCCCCTAAATACTCAACAGTACTCT  
CGAGCCAT

TGCAGAAGATTGAGAAGACTACTACGTATTTTTTTTTTATATGCATCCTTTTTTCCACATATGTATGCGCGG  
TGCGCGCGCGCCATTAATAAGATTTTTTCTTAGCTCTTTTTCTTTTTTCTTTTTCTTTCCACTGAGATGCG  
TTCTTCGG

ATTTTATTTTACGTTTGTAAATTCATTATACTGATAATATTTTTGAATTTTTTTTTTTTTTTGATACATTTT  
TTTTAATCGCTGTTTTGTCTGTTTTTTTTCGATTGATTATAGGGAAAAAACGGGAAAGGAAAGAGAAAA  
AAAATTAG

CTTTCACACATTTTCTCATTGGTCTTTGTACCTATAAATTGTTTCATATTATATATACGTTTGTAAACAAAT  
CGATAAATAGCAACAATATTTTTGCTTATTTTGATATCCTGAAATCCTTTTTTTTTTTTTTTTTTTTTTTT  
TTTTTTTT

TAGTAAGAAAGATTGGACTAGGCATCACCCAGACTTTACTTTTTTCGGCATACATATCTATTTATATATAGT  
TTAATACGTAAATACAAATATATATATACTGTAAATTTTAATCATTAAGCTTTTCTTTTTTTTTTTGTTTCAC  
GCTTTCAC

GTAATAAGTTTTTACCTTTTTCCGGTGAATAATGAAAAAAAAAAAAACGAATACAAAAAAAAAAGTAATTTCT  
TTCAAGTTTTATATATATAACAATATAATATTAAGTAATTTAATCGAAAATTTTTTCTCTAAAGAACCCA  
AAAATAAG

CATTAACGGAGTTTTTTGTTTTCGCTTTTTTTATTTTTTGTTCCTAATTTTTTTTTTTTTTACATTTTATT  
AGCTATACACTTGGCGCAAGGATATTTTATATACCGGATATAATAGATAATTAAGACTACTAATTAATA  
ATGATGTA

TTTTTTCTTTCTTTTTTTTTTTTACCTGGGACGACATTCTAACTAATGAAATTTACGATTAATTATTCTTTT  
TTTTTTTTTTCAAGAAATAAATACTGTAACATATATATATTAATTATGGGGGATCACAAGAAAAATA  
GTAACTTT

TGCATCCTTTTTTCCACATATGTATGCGCGGTGCGCGCGGCCATTAATAAGATTTTTTCTTAGCTCTTTT  
TCTTTTTTCTTTTTCTTTCCACTGAGATGCGTTCTTTCGGTATATAGTGAGAACACTTACAACGTATACGA  
ACATCGAA

ACGCGACATGGTGGGGGACGTGTAGTCGTGCCCTGCGATCCGCTTTATTACGTATATTGCCTTCACATGCC  
GTGAAAGCCGACAGGGACAACGCGGATAAAAAAAAAAATTAAGTAAACTACGTACGCGGCGGCGCGAC  
TCGAATCC

GGCATCACCCAGACTTTACTTTTTTCGGCATACATATCTATTTATATATAGTTTAATACGTAAATACAAATA  
TATATATACTGTAAATTTTAATCATTAAGCTTTTCTTTTTTTTTTTGTTTCACGCTTTCACCCTGTGAGGCGA  
ATGAGGTT











GATAAACGAGCGGCTGATAAATTAGTTTCTTTTTTTTTTTAATTTTTTTTTTTTTTTGATCTCATTTCTTTT  
TTTATTGAATCTTTTTTTTTTTGTAAGAAAATTAAGGTTTATTAGGCAGAGTATACCGAGTCGTTTGAAGTC  
ATCTCCGG

AAAAGCAAGAAAAAGCGACACCAGTAAATTTTCAGACATCTTCGAGAATTTTTTTTCGCGCGCTTTCTATCA  
AAAAAAATGAAAAATAAATAAATAAACAAAGGAAAATAACAACAACATATACTGTTCTTATATAACATA  
GAACATCT

TTTTGTACAAGTTGCGGATTACTTCTCTTTGTTTACCTTTTTGCTTTTTATTTTTTTTTTTAATACGTGCAT  
ATATATATATATATTTAGTTTAGGTCAGAATACAAAGATAATTATGTATAAATGGGCGCATTGGAACATA  
TTTTACAT

TTTTCTTTCCCATTTTTGCTGGTAGTCAACAAAGTTGTCTTAAGGAAAAAAAAATAAGAAAATATTGAAAA  
CTAATAAGTTTTTTTTCTGTAAAAGTGATAAAATATATAGGAGATCCCGTCAAATAATAGAAAAAAAT  
TTTTGCCA

AACTGGACAGTAGTAAGAAAGATTGGACTAGGCATCACCCAGACTTTACTTTTTTCGGCATACATATCTATT  
TATATATAGTTAATACGTAAATACAAATATATATATACTGTAAATTTAATCATTAAGCTTTTCTTTTTT  
TTTTGTTC

TTTCTGGAAAAATACATAGCCTAACCAAGCAATTTTTATTTTACGTTTGTTAATTCATTATACTGATAATATT  
TTTGAATTTTTTTTTTTTTGATACATTTTTTTTTAATCGCTGTTTTGTCTGTTTTTTTCGATTCAGTTATA  
GGGAAAA

CCGGCTTGGCTTCAGTTGCTGATCTCGGCGCGGAAAAATCAGCGCCCCACGCCAAAAGGTTTCGTATTTTTT  
CTTTTTTTTTCTAATCTTCCATCTATTCCGGTAGCGATGATTCAATTTCTCTGAAAAAAAAAAAAAAAAAAAA  
AAATGAAA

GCGAGCCGAGGAGACGAGTGTCACTTCTGAACATACCCATCTCAAAATTAAGAAATAGCAATAACACGCGT  
GCAGAAGATTGAGAAGACTACTACGTATTTTTTTTTTATATGCATCCTTTTTTCCACATATGTATGCGCGGT  
GCGCGCGC

TTTCGTTGTGAAATATTATTTTTTTTTTTTTTTGAAAAAATGTCCGACTTTATTCTCCTAATTATTAATAA  
AATACGAATATATATCTAAATATAATTAATGCTTATTTACATGAAAAATCATCAATCGTAAACAGTTGATT  
AAAAACA

ATTCATTATACTGATAATATTTTTGAATTTTTTTTTTTTTGATACATTTTTTTAATCGCTGTTTTGTCT  
GTTTTTTTCGATTCAGTTATAGGGAAAAAACGGGAAAGGAAAGAGAAAAAAATTAGTGCAGAGCAATA  
AGAAGCGA

TCTTTTTTTTTCTAATCTTCCATCTATTCCGGTAGCGATGATTCAATTTCTCTGAAAAAAAAAAAAAAAAAAAA  
AAAATGAAAAGAATATTTTTTTGATGAACTTGTATTTCTTTATCTGGTTGATATATATGCTATCATTTA  
TTTTCTTA

ACCCACTCAAAAATATAATTGGCAATGAAAATATAACTTTTTTAGATGTTAGCGATGCTATATCATCTGAG  
ATGAGATGAGATGAGATGTTTATTATGATCCATTTCTTTCTTTTTTTTTTTTTTTTTTTTTTTTTTTTTTT  
CATTTTTT

AGAAAAGTGTCAAGTTTCCAGATTTTTAAGATCCTTATAACCTGTAAAAAAAAAAAAAAAAAAAAAAAAAAG  
AAGGGTTAAATAAAAATCGGACTTACTCAAAGGGTTGAAAAGCACTTAAATATAGGTTTTTAGTTTCGGG  
TAAGAAGA

AGCGCCCCACGCCAAAAGGTTTCGTATTTTTTTCTTTTTTTTTCTAATCTTCCATCTATTCCGGTAGCGATGAT  
TCATTTCTCTGAAAAAAAAAAAAAAAAAAAAAAAAAATGAAAAGAATATTTTTTTGATGAACTTGTATTTCTC  
TTATCTGG

TGCTACAGGACCTAGGGTCTCGCTAAAAAATGACTACGCGCGCTTATATAATTACTCGAATAAGACAAA  
AGAAAAAACCCCTTGCATATGTCGTAGACACGTAAAAATGGCCATTTAGTGGTAGTCGAAACTAGAGG  
GGTAAAAA

TTTTTTTTTTTTTTTTTTTTTTTTTTTTTTCATTTTTCAACGCGGGTAATAGAGAATACATCCACTGTCCGGGTAAATT  
ATGTTACAGTTAGCGCTTAATGTTCACTTCACAGTATTATGAGCTGTTTTTGTAAATAAGACGACTATAAC  
ATAACAAA

GTTGCGGATTACTTCTCTTTGTTTACCTTTTTGCTTTTTATTTTTTTTTTTTTTAATACGTGCATATATATATAT  
ATATTTAGTTTTAGGTCAGAATACAAAGATAATTATGTATAAATGGGCGCATTTGGAAACTATTTTACATAC  
AACTGAAC

AGACTTTACTTTTTCGGCATACATATCTATTTATATATAGTTTAATACGTAAATACAAATATATATATACT  
GTAAATTTAATCATTAAGCTTTTCTTTTTTTTTTTGTTTACGCTTTTACCCTGTGAGGCGAATGAGGTTAG  
CTTTTTCC

GGTCAAACAATCTAGATTGTTCTGAAGATCAAATAATATATATATATATATATATATATATATATATATGTT  
TATACACTTAACTTACGTACAAAAATATAGATTTGAAACGAATCAGTTGCTCTTAGCCTGCACATCTAGA  
AATGTATT

AATTCGTACACGCGACATGGTGGGGGACGTGTAGTCGTGCCCTGCGATCCGCTTTATTACGTATATTGCC  
TTCACATGCCGTGAAAGCCGACAGGGACAACGCGCGATAAAAAAAAAAATTAAGTAAACTACGTACGCG  
GCGGCGG

ACTTCTTATTATCACGAAAAACGTCTTTTTTCATGCAAGGAAGGACTACAGTATATACATATAAATATAT  
ATTTATGTAATTATTTTTTTCTTTTTTTTTTAAATTTTCTAGCGAGAATGAAGAAAAGCCGACCTCATCTCA  
TCCTATTT

AATAATTTACTATTCAAATATTTGCCTTTTTCTTTTTTAATTTTTGTTTATTCTTTAATGTATAAATTAAT  
AAAAAATATTATTATATTTACTAATTAAGAGCGAAGCGTTTTATGTAGCTCCTTGGCCATACATACATTG  
CGCGCAAT

CTAAGCTGCCCCGACCTCACGAAATCAGTCATGCGGTAGTCCATTATAATATAACTATTATTATTACTA  
TTACTATTATTATTATTATTATTATCTATTGTTTATATTCTCTTTAGCTTTTTTATCACCTACGACGAC  
GGATATAT

AAATAATGTTATAACGATTGAAGGGATCCGCTGAGGAATGAAAAAAAAAATAAGAAAGTAAGAGAAGGG  
AAAAAAAAAAGAAAAAAAAAAGAAAAAAAAAAGAAAAAAAAAAGAGGGAATGATCGAAGATAAAAAATCTCA  
GAAATTTG

AGTCATGTAAGTACCATTAAATTTTTCTTTCTTTTTTTTTTTTTTTTTTTTTTTTTTTTTTTTTTTTTCTCTATTTCTTT  
TTTTGTTCTAGTCGGTTACGCAGTTCTGAGTAATGTAATATAGCGTTCCTTTTTCTCTCAGATTTTTTTTGA  
CCTTATTT

GAAATGTTTTATTCTATATTGGTAGAGTTAATAAATAATTATATAAATAAATTATTGTATGATAATATAAA  
TAATAGTTTATGTAATATTTTAAGTTATTATTTATAATAAAAAAGTAACTATTGAACCTGTTAAATTA  
TATATTCA

AAAAAGCGACACCAGTAAATTTTTCAGACATCTTCGAGAATTTTTTTTCGCGCGCTTTCTATCAAAAAAATG  
AAAAATAAATAAATAAACAAGGAAATAAACAACAACATATACTGTTCTTATATAACATAGAACATCTAT  
TGTTTTCCG

TTTCCACATATGTATGCGGGTGCAGCGCGCCATTAAGATTTTTTTCTTAGCTCTTTTTCTTTTTCT  
TTTTCTTTCCACTGAGATGCGTTCTTCGGTATATAGTGAGAACACTTACAACGTATACGAACATCGAAGG  
AGCACCTA

ACCAAACCAGCAAAAGGTATATAATTCATTCAATAGATACAACCTGCTCCATGAAAGGAAAAACCTTCATTT  
ACGGTCGCGTTTTTTTTTCGTGATATAAAAAAGGTAAAAAAACGCGTCGCGTTAGAAAAAGGTGTGTGTG  
AAGAGAAA

GATCCTTATAACCTGTAAAAAAGGGTTTAAATAAAAAATCGGACTTACTCA  
AAGGGTTGAAAAGCACTTTAATATAGGTTTTTAGTTTTCGGGTAAGAAGATGTGTCAAAGGTCTCGAAAAGG  
AAACATTA

CAGATATAGTGTGAATGATAATTCACCTTTTTTTTTCTTTCTTTTTTTTTTTTACCTGGGACGACATTCTAA  
CTAATGAAATTTACGATTAATTATTCTTTTTTTTTTTTTTTTCAAGAAATAAATATAACTGTAACATATATAT  
ATTAATTA

GAAAAAGCATCAGTTACGAGACTCCTGAAGGAGCGCCGAAAGTTTCTTTTTTTTTTTTTTTTTTTAATT  
TTTTTTGTGTGGGAAAGACCGACTACCAGTAATACTTTAAAGATATTATTTAAAGAAATCCCGAAAAAAG  
AAAGACCA

TCTTTTTTTTTTTTTTTTTTTTTTTGAATGATATTAAGTTATACGAATGTTTCGATAATATATATGTATGAAT  
AAATAAAAAGTTTTTAAAGTAGCCTTAAAGCTAGGCTATAATCATGCATCCTCAAATTTCTGTTAAAGTAGG  
TCCCTCAT

AAAAATGCATATCCGAAAGGACCAAACCAGCAAAAGGTATATAATTCATTCAATAGATACAACCTGCTCCAT  
GAAAGGAAAAACCTTCATTTACGGTCGCGTTTTTTTTTCGTGATATAAAAAAGGTAAAAAAACGCGTCGCG  
TTAGAAAA

CTTCTTTTCTTTTTGTACAAGTTGCGGATTACTTCTCTTTGTTTACCTTTTTGCTTTTATTTTTTTTTTTTA  
ATACGTGCATATATATATATATATATTTAGTTTAGGTGAGAATACAAAGATAATTATGTATAAATGGGCGCAT  
TTGGAAAC

GAAGGGATCCGCTGAGGAATGAAAAAAAAAATAAGAAAGTAAGAGAAGGGAAAAAAAAAAGAAAAAAGA  
AAAAAAGAAAAAAGAAAAAAGAGGGAATGATCGAAGATAAAAAATTCTCAGAAATTTGAGAAGAAGGAAA  
AACTCTAC

GCCTTGTAAGTACTTGGCTCACGAATACATATCAAGATACTTATGATATATATATATAGAAAAAGCTTACT  
TTTCTTGAGTTATTGTTATTATCATCGCGAAGAACGATTGTATAACCCGGTTCAACGCGAAACGAATCGT  
TAAACTGG

AGTGCTTTTTTTTTCTTTCCATTTTGCTGGTAGTCAACAAAGTTGTCTTAAGGAAAAAAAAATAAGAAA  
ATATTGAAAACATAAAGTTTTTTTTCTGTAAAAGTGTATAAATATATAGGAGATCCCGTCAAATAATAG  
AAAAAAA

TAAACTTTTCGAGAAAAGTGTCAAGTTTTCCAGATTTTTAAGATCCTTATAACCTGTAAAAAAGGGTTTAA  
AAAAAAGAAAGGGTTTTAAATAAAAAATCGGACTTACTCAAAGGGTTGAAAAGCACTTTAATATAGGTTTT  
TAGTTTCG

ATAATTCATTCAATAGATACAACCTGCTCCATGAAAGGAAAAACCTTCATTTACGGTCGCGTTTTTTTTTCGT  
GATATAAAAAAGGTAAAAAAACGCGTCGCGTTAGAAAAAGGTGTGTGTGAAGAGAAAGACCCATTGAAT  
GGAGAGTT

AGAAGTACATTTTGATGATGGTTGTGATACTGTGGGTGTATTATTACTATTATTATTATTATTATTATTAT  
TATTATTATTACTATTATTACTATTATTATTATTATTATTATTATTATTATTATTATTATTATTATTATTAT  
TTGTTAGG

ACCAGTAAATTTTCAGACATCTTCGAGAATTTTTTTTCGCGCGCTTTCTATCAAAAAAATGAAAAATAAAT  
AAATAAACAAAGGAAATAAACAACAACATATACTGTTCTTATATAACATAGAATCTATTGTTTCCGTC  
TTTTGCTC

GGTTCAAAGCGCCTTGTAAGTACTTGGCTCACGAATACATATCAAGATACTTATGATATATATATATAGAA  
AAAGCTTACTTTTTCTTGGAGTTATTGTTATTATCATCGCGAAGAACGATTGTATAACCCGGTTCAACGCGA  
AACGAATC

CTCAAGTATAACCCACTCAAAAATATAATTGGCAATGAAAATATAACTTTTTTTAGATGTTAGCGATGCTAT  
ATCATCTGAGATGAGATGAGATGAGATGTTTATTATGATCCATTTCTTTTCTTTTTTTATTTTTTTTTTTTT  
TTTTTTTT

TCCTCGACACCAAAAAAATGAATAAATAATGTATAAAACATATAACTTTGCAAATGATTCAAAAATTCAA  
ATTTTCTCTCTCTCTCTATAAACATAAATATATATGTGTATATGTTTTCTTTTTTTTTTTTTTTTTTTTT  
TTGAATGA

TTTTTTTTTTTTGAAAAAATGTCGGACTTTATTCTCCTAATTATTAATAAAATACGAATATATATCTAAA  
TATAATTAATGCTTATTTACATGAAAAATCATCAATCGTAAACAGTTGATTAAAAAACAAAACTTTATCG  
GTTCCATT

GCTGAGGAATGAAAAAAAAAATAAGAAAGTAAGAGAAGGGAAAAAAAAAGAAAAAAGAAAAAAGAAA  
AAAAGAAAAAAGAGGGAATGATCGAAGATAAAAAATCTCAGAAATTTGAGAAGAAGGAAAACTCTACTT  
AAATAAAG

AAGAGAAGGAAAAATAATGTTATAACGATTGAAGGGATCCGCTGAGGAATGAAAAAAAAAATAAGAAAGT  
AAGAGAAGGGAAAAAAAAAGAAAAAAGAAAAAAGAAAAAAGAAAAAAGAGGGAATGATCGAAGATA  
AAAATTCT

ACCCAATCGGTTTTCTATTCTCACCCTTTTTCTGGAAAAATACATAGCCTAACAAGCAATTTTATTTTA  
CGTTTTGTTAATTCATTATACTGATAATATTTTTGAATTTTTTTTTTTTTTTGATACATTTTTTTAATCGCT  
GTTTTGTC

CAGTTACGAGACTCCTGAAGGAGCGCCGAAAGTTTTTTTTTTTTTTTTTTTTTAATTTTTTTTTGTGT  
GGGAAAGACCGACTACCAGTAATACTTTAAAGATATTATTAAGAAATCCCGAAAAAGAAAGACCATG  
AGAAAACC

TTTAACTTAATAAACTTTTCGAGAAAAGTGCAAGTTTTCCAGATTTTTAAGATCCTTATAACCTGTAAAAA  
AAAAAAAAAAAAAAAAAAGAAGGGTTTAAATAAAAATCGGACTTACTCAAAGGGTTGAAAAGCACTTTAA  
TATAGGTT

ATCCGAAAGGACCAAACCAGCAAAAGGTATATAATTCATTCAATAGATACAACCTGCTCCATGAAAGGAAAA  
ACCTTCATTTACGGTCGCGTTTTTTTTCTGTGATATAAAAAAGGTAAAAAACGCGTCGCGTTAGAAAAA  
GGTGTGTG

GATAAATTTCCCGTTTTCTTTTACTTTTACTTTTCAATTAATAATTCATATTTATTTCCCATGTACCAAT  
TAATTACTCCTAAAAGAACAGAAATAGAAAAAGTTGTATATAACAAGCCAAAAAAAAAAAAAGAAAAAGG  
AAACACAG

TGACCCATTAATTTCTTTTTCTTTTTTTTTTTTTTTTTTTTTTTTTTCTCTATTTCTTTTTTTGTTCTA  
GTCGGTTACGCAGTTCTGAGTAATGTAATATAGCGTTCCTTTTCTCTCAGATTTTTTTGACCTTATTTG  
TTTCCACT

AGCATATGTTAAATATTTTATTTATAGATTTTTCGTTGTGAAATATTATTTTTTTTTTTTTGAAAAAATG  
TCGGACTTTATTCCTCCTAATTATTAATAAAAATACGAATATATATCTAAATATAATTAATGCTTATTTACA  
TGAAAAAT

TGATACATTTTTTTAATCGCTGTTTTGTCTGTTTTTTTCGATTTCAGTTATAGGGAAAAAACGGGAAAGG  
AAAGAGAAAAAATAGTGCAGAGCAATAAGAAGCGAAAATCAAAAAAAGTTTTGGATCTGCAAGACT  
TGCTGTCA

TACTATCTAATACCTCTGTTCTTATACGGTTCCAAATTGAAAAAAAAAATTAAGTGCAGAAAAGATGTCACAC  
GTCAGTAAATCCGCGCAAACCCCGTTATATTTCCGACGTCGTGCGGTAGTTTCTGCGCGGAACGGCCCCG  
CGGAATAG

GTTCCGAAGAAAAAAAAATAAAAAAAAAAGGGCCGACGGAGGGTTAGGTCAAATTAATATTGAGCTAGGTTTA  
GTTATCTCTTTTTTAGGTTTTTATATACAAAAAGATTATATTTAGGGTACATATGGCTGGAGCATAATG  
TCTGGAAT

AGATTTATTGTGTTATAAATATAGATATACAATTCCTTTATAAAAAAAAAATATATATATATATCATTGTTATT  
AAATAAGAGTTTTTCTAGTATATAGATTAAAAACTACTCTATTAAATGAGAGCTAAAAAAGCAGGCTG  
CCAAAAA

AAATATTTTTATTTATAGATTTTTTCGTTGTGAAATATTATTTTTTTTTTTTTTGAAGAAAATGTCGGACTTTA  
TTCCTCCTAATTATTAATAAAAATACGAATATATATCTAAATATAATTAATGCTTATTTACATGAAAAATCA  
TCAATCGT

ATTTTCTTTTCTCTTTTTTTTTTTTTTTTTTTTTTTTTTTTTTTTTTTTTTCTCTATTTCTTTTTTTGTTCTAGTCGGTTACG  
CAGTTCTGAGTAATGTAATATAGCGTTCTTTTTCTCTCAGATTTTTTTGACCTTATTTTGTTCACTTTT  
TTACTACT

CGCTTTATTACGTATATTGCCTTCACATGCCGTGAAAGCCGACAGGGACAACGCGCGATAAAAAAAAAAATT  
AAAAGTAAAACCTACGTACGCGGGCGCGACTCGAATCCTTGACTCCGACTGAGGAGACCCGAACAACGCT  
CCCTGCTC

CTACTTTTTTTGAATAGGCATAGTTCACACTTTTTATCTCCTTAGTTTGTACTACTCTTTTTTTATTTTTTTTT  
TTTTCTTCCACTCAGCTATTAGATTATTTATTATTTTATTATCTGTGGTATCATTCTTACAGCCATACCT  
TGATTTTA

TTTTTATATTTTCGGCATTATTTATGCTCGGCATTTCCCAACAGAAGCGGATATATTTAAGGGCGCGGAGA  
TGAGCCAAACGGCAAGCGATATCAAAATATCTGCATAATAACGGCAATCAACGCGCACGCGAATGGCCAAG  
AGGGTACA

GCATTC AATACACACGCGAAGGCAGTAGGCGATGAAAGGAAGTTTTTTAATGTCATTAAGAAAAAGATAGG  
GAACCTCTATTTCTGTCTTTTCATATATATATATATATATATATATATATATATATATATATATGTGCATATGTACATCGT  
TGAGTTGT

CCCTGCGATCCGCTTTATTACGTATATTGCCTTCACATGCCGTGAAAGCCGACAGGGACAACGCGCGATAA  
AAAAAAAAATAAAAGTAAAACCTACGTACGCGGGCGCGACTCGAATCCTTGACTCCGACTGAGGAGACCC  
GAACAACG

TCATCTCCGGGTAGTGATTTTTATCACGTGACACTTTTTTATTCCTTTTCTTTTTCTTTTTTAAATTTTT  
TTTTTTTTTTTTTTCATTGATTAACCGCTCTTCTTTATCACTCTCGCATTCTGTCTACTAAACGGTAAAAAA  
ACGAAGTG

TTATTTTTTTGTTCCCTAATTTTTTTTTTTTTTTTACATTTTATTAGCTATACACTTGGCGCAAGGATATTTTAT  
ATACCGATATAATAGATAATTAAGACTACTAATTAATAATGATGTAATATGGTAATAGGTATGGAAGA  
ATCAGGGA

CGTATATTGCCTTCACATGCCGTGAAAGCCGACAGGGACAACGCGCGATAAAAAAAAAAATAAAAGTAAAA  
CTACGTACGCGGGCGCGACTCGAATCCTTGACTCCGACTGAGGAGACCCGAACAACGCTCCCTGCTCTC  
CGCCTTCG

TAACAAGATCATGAAATATTCATTAACGGAGTTTTTTGTTTTCGCTTTTTTTATTTTTTTGTTCCCTAATTTT  
TTTTTTTTTTTACATTTTATTAGCTATACACTTGGCGCAAGGATATTTTATATACCGGATATAATAGATAAT  
TAAAAGAC

CCCCTTCTCGCGCTGGCGAAGAAGTGAAAAAAAAAATAAAAAATGGAAATTTTCGGACGATCGTCATTTT  
GAAAATACATAGTGAGCCAATATTATACTAGGAGTATATATATTTAGAGGCCAGTTCTGCTCTCTTGTCAA  
TTGCCCGG

GATGCCGTATCTTTCCACACATTTTCCTCATTGGTCTTTGTACCTATAATTGTTTCATATTATATACGTT  
TGTAACAAATCGATAAATAGCAACAATATTTTTGCTTATTTTGATATCCTGAAATCCTTTTTTTTTTTTTT  
TTTTTTTT

TGAAACCATGCAGATATAGTGTTGAATGATAATTCACCTTTTTTTTTCTTTCTTTTTTTTTTTTACCTGGGAC  
GACATTCTAACTAATGAAATTTACGATTAATTATTCTTTTTTTTTTTTTTTCAAGAAATAAATATAACTGTA  
ACATATAT

TCCAAATTGAAAAAAAAATTAAGTGCAGAAAGATGTCACACGTCAGTAAATCCGCGCAAAACCCCGTTATA  
TTCCGACGTCGTGCGGTAGTTTCTGCGCGGAACGGCCCCGCGGAATAGGCACATTTTCTTCCGGCCGCGAG  
AAAGCTCT

TCACGTACATAGGTACACGCAGATGGGACAGGCGCATAAGTACGCGCTAATACATGTATTGATATAAGTTA  
TGTTTTTATTTATCAAAATGATATTGTTGCATTTTTTTTTTTAAATCTCACGTTATTTTTTATTATATAC  
ATACACTT

GGCTTAACTTTAAAGAAAAAGTTGAGATTAGATTTATTGTGTTATAAATATAGATATACAATTTCTTTATA  
AAAAAATATATATATATATCATTGTTATTAAATAAAGAGTTTTCTAGTATATAGATTAAAAACTACTC  
TATTAAT

CCTGCCGGTACCGGCTTGGCTTCAGTTGCTGATCTCGGCGCGAAAAATCAGCGCCCCACGCCAAAAGGTT  
CGTATTTTTCTTTTTTTTTCTAATCTTCCATCTATTCCGGTAGCGATGATTCATTTCTCTGAAAAAAAAA  
AAAAAAA

GTAGCGATGATTCATTTCTCTGAAAAAAAAAAAAAAAAAAAAAAAAATGAAAAAGAATTTTTTTTGATGAAC  
TTGTATTTCTCTTATCTGGTTGATATATATGCTATCATTTATTTTCTTATCAAGTTTCCAAATTTCTAATC  
CTTTCTCC

TTTATAGATTTTTTCGTTGTGAAATATTATTTTTTTTTTTTTTTGAAAAAATGTCGGACTTTATTCTCTCTAA  
TTATTAATAAAATACGAATATATATCTAAATATAATTAATGCTTATTTACATGAAAAATCATCAATCGTAA  
ACAGTTGA

TTATCGCTTTTTACGTCGAAAGGAAAAAATAAAGCGTAAGCAATGGTGTAGATACTTCTTATATAGACGT  
TATTATTACTATTATTATTATTATTATTATTATTATTATTATTATTATTATTATTATTATTATTATTATTA  
TTATTATT

GTGGGGGACGTGTAGTCGTGCCCTGCGATCCGCTTTATTACGTATATTGCCTTCACATGCCGTGAAAGCCG  
ACAGGGACAACGCGCGATAAAAAAAAAATTAAGTAAACTACGTACGCGGCGGCGGACTCGAATCCTT  
GACTCCGA

AGAAGATCTGCAGTAATCGTTTTCTTTTTTTTTTTTTTTTATTAATTTATATGCTATCCTTTTAAAAATAGAC  
ATGTCATTTCAAACGACATGTTAAAAATTATATATATGTTTATATATAGATTGATATATGTTGGAGCCGTT  
GGACAATT

AAATTTTCTTTTTTTTTTTTTTCCATTTTCAATTTTCAATTTTCAATTTTCTGCGAGTTATTTTTTTTTCTTATTAATC  
TATATCCATGTAATCGTTAGCGATATTGTTGTTAGTCAACGCGCCATGGCAGTACCGGGTGCTTGTGATG  
CAATTATA

GAAAAAAAAAATAAGAAAGTAAGAGAAGGAAAAAAAAAAGAAAAAAAAAGAAAAAAAAAGAAAAAAAAAGAAAA  
AAGAGGAATGATCGAAGATAAAAAATCTCAGAAATTTGAGAAGAAGGAAAACTCTACTTAAATAAAGAT  
AACTTTT







TATCCAATAGCTATGTACTCAAGTACCGTGTATACACTATAAAAATCTCATCTCATCGCTAAAGCTAATATT  
GAAAAAAAAAAAAAAAAAAAAAAGGAAAAGGCAAATAAAAAATTTTCAATTCGGGTAACGAAGAATCGACTC  
TCGCCGGG

GTTTACCTTTTTGCTTTTATTTTTTTTTTTAATACGTGCATATATATATATATATTTAGTTTAGGTCAGAA  
TACAAAGATAATTATGTATAAATGGGCGCATTGGAACTATTTTACATACAACCTGAACAAGTTCGGAACA  
ATCTATCA

AAGTACCGTGTATACACTATAAAAATCTCATCTCATCGCTAAAGCTAATATTGAAAAAAAAAAAAAAAAAAAA  
AAGGAAAAGGCAAATAAAAAATTTTCAATTCGGGTAACGAAGAATCGACTCTCGCCGGGTAAACAATTCTT  
AGTCGTCA

AAAAAGAGATGAAAAATGCGATGAGCCAAGCATGATTTGAATCGGATGGATTCTCAACTGATATTTATAT  
GGCTTTTTTCAGTTTTTTTTTTTTTTTTTTTTTTTTTTTTCAGCATCTCGAAGAGCAAAAAAAGGAACGAAAA  
GTGCCACG

ACAAAATTGGGACTAATATTAAGGGCGACAGTTTTTCTTAAAAGTAAGATTTTTTACTTAAAAATTTCTTGT  
TCTTAACGAAATTACATACGTATTAATAATTTTATTAGATAGTCGGTATTGTCTTTTTTGTGAAAAAAAA  
AATTATAA

CAAAAAAATGAATAAATAATGTATAAAACATATAACTTTGCAATGATTCAAAAATTCAAATTTTCTCTC  
TCTCTCTATAAACATAAATATATATGTGTATATGTTTTCTTTTTTTTTTTTTTTTTTTTTTTGAATGATA  
TTAAGTTA

GTATACCGAGTCGTTTGAAGTCATCTCCGGGTAGTGATTTTTATCACGTGACACTTTTTTATTCTTTTTCT  
CTTTCTTTTTTAAATTTTTTTTTTTTTTTTTTTTCATTGATTAACCGCCTCTTCTTTATCACTCTCGCATTCT  
GTCTACTA

AAGGAAAAAAAAATAAAGAAAATATTGAAAACATAAAGTTTTTTTTCTGTAAAAGTGTATAAAATATATA  
GGAGATCCCGTCAAATAATAGAAAAAAAAATTTTTTGCCACATATACCTGTAGCCCCAGGAATACTGAAAA  
ATGGAGTA

TTTTTTTTTTTTTACATTTTATTAGCTATACACTTGGCGCAAGGATATTTTATATACCGGATATAATAGATAA  
TTAAAAGACTACTAATTAATAATGATGTAATATGGTAATAGGTATGGAAGAATCAGGGAGTTTTTCAGAATG  
TTCTTTGC

ATAACGATTGAAGGGATCCGCTGAGGAATGAAAAAAAAAAAAATAAGAAAGTAAGAGAAGGGAAAAAAAA  
GAAAAAAGAAAAAAGAAAAAAGAAAAAAGAGGGAATGATCGAAGATAAAAAATCTCAGAAATTTGAG  
AGAAGGA

TTCTCTCGGTGTGCAATATAGTAATAAGTTTTCACTTTTCCGGTGAATAATGAAAAAAAAAAAAACGAATA  
CAAAAAAAGTAATTTCTTTCAAGTTTATATATATAACAATATAATATTAAGTAATTTTAATCGAAAA  
TTTTCTCT

TAAAGAAAAAGTTGAGATTAGATTTATTGTGTTATAAATATAGATATACAATCTTTATAAAAAAATAT  
ATATATATATCATTGTTATTAATAAAGAGTTTTCTAGTATATAGATTAAAAACTACTCTATTAATGA  
GAGCTAAA

GGCGCATAAGTACGCGCTAATACATGTATTGATATAAGTTATGTTTTTATTTATCAAAATGATATTGTTGC  
ATTTTTTTTTTTAAATCTCACGTTATTTTTTCAATTTATATACATACACTTAAGAGAATGTCAGATTTTCTCT  
TTTCGGCC

GGATGCCCTTTTAGTGTCAAACCTTCTTATTATCACGAAAAACGTCGTCTTTTCATGCAAGGAAGGACTACA  
GTATATACATATAAATATATATTTTATGTAATTTTTTTTTCTTTTTTTTTTAAATTTTCTAGCGAGAATGAA  
GAAAAGCC

CAATAGATACAACCTGCTCCATGAAAGGAAAAACCTTCATTTACGGTCGCGTTTTTTTTTCGTGATATAAAAA  
AGGTAAAAAAACGCGTCGCGTTAGAAAAAGGTGTGTGTGAAGAGAAAGACCCATTGAATGGAGAGTTCCG  
GTTCTTGG

ACTCCTGAAGGAGCGCCGAAAGTTTCTTTTTTTTTTTTTTTTTTTTTTAATTTTTTTTTGTGTGGGAAAGAC  
CGACTACCAGTAATACTTTAAAGATATTATTTAAAGAAATCCCGAAAAAGAAAGACCATGAGAAAAACCGA  
GTGCGTTT

TGCCTTTATGAGTCATGTACTGACCCATTAATTTTCTTTTCTCTTTTTTTTTTTTTTTTTTTTTTTTTTTTCTC  
TATTTCTTTTTTTGTTCTAGTCGGTTACGCAGTTCTGAGTAATGTAATATAGCGTTCCTTTTCTCTCAG  
ATTTTTTT

ACCTGTAAAAAAGGAGAGGAAAAGGAGGTTTAAATAAAAAATCGGACTTACTCAAAGGGTTGAA  
AAGCACTTTAATATAGGTTTTTAGTTTTCGGTAAGAAGATGTGTCAAAGGTCTCGAAAAGGAAACATTAGG  
GCAAATAC

TTACTAAGAAAAGGAGAGGAAAAGGACGTGCATATATTCTTTTAATACATTTAAAATATGATTCTAATCAT  
TTCTTATATAATAGTGTATAGTCTAATCATTTCATCGTGTATAGTAACCCTTTTTGTTTTTTTTTATGCAA  
GTTTTTTTT

GATCTCCCTTCCGGTTGTGTCTTTTCATAATAATATGGTTTTTTTTTATTTCATAATTTGGTAATAACGGTTG  
ATAAACGAGCGCTGATAAATTAGTTTTCTTTTTTTTTTTTTAATTTTTTTTTTTTTTTGATCTCATTTCTTTTT  
TTATTGAA

ATCAAGATACTTATGATATATATATATAGAAAAAGCTTACTTTTCTTGGAGTTATTGTTATTATCATCGCG  
AAGAACGATTGTATAACCCGGTTCAACGCGAAACGAATCGTTAAACTGGTGAATGTTAACGCGAGTGTCA  
GAGATATA

ATAATCATAATCAAAACCAACATACCAATTAATTAATACTGCTTTTAATCTGCATACATAAACTTAGAT  
CAAATAAATAAAAAAAGTAAACAACCATATATACTATTTTCATAAGCAAAAGTAATCAAATTAACAA  
AAAAAGA

AAGAAGATACAATGAAAGAAAAGAGAAGGAAAATAATGTTATAACGATTGAAGGGATCCGCTGAGGAATG  
AAAAAATAAAGAAAGTAAAGAGAAGGAAAAAAGAAAAAAGAAAAAAGAAAAAAGAAAAA  
AGAGGGAA

CATACCAATTAATTAATACTGCTTTTAATCTGCATACATAAACTTAGATCAAATAAATAAAAAAAG  
TAAACAACCATATATACTATTTTCATAAGCAAAAGTAATCAAATTAACAAAAAAGAAAAATACAAATAT  
TAAATTTA

ACTACGAAACGATAAATTTCCCGTTTTCTTTTACTTTTACTTTCATTTAATATAATTCATATTTATTTCC  
ATGTACCAATTAATTAATCTCTAAAGAACGAAATAGAAAAAGTTGTATATAACAAGCCAAAAA  
AGAAAAA

AAAAAATAAATTAAGTAAAGATGTACACGTCAGTAAATCCGCGCAAAACCCCGTTATATTTCCGACGT  
CGTGCGGTAGTTTCTGCGCGGAACGGCCCCGCGGAATAGGCACATTTTCTTCCGGCCGCAAAAGCTCTCT  
TTATCAA

CTGATGGTGATGAAACCATGCAGATATAGTGTGAATGATAATTCACCTTTTTTTTTCTTTCTTTTTTTTT  
TACCTGGGACGACATTCTAACTAATGAAATTTACGATTAATTATTCTTTTTTTTTTTTTTCAAGAAATAAA  
TATAACTG

ATTCCTTTTATCTTCTTTTCTTTTTGTACAAGTTGCGGATTACTTCTCTTTGTTTACCTTTTTTGCTTTTATT  
TTTTTTTTTAATACGTGCATATATATATATATATTTAGTTTAGGTGAGTAAACAAAGATAATTATGTATAA  
ATGGGCGC

GGATTTTCGATGACCTAGGTTTAAACAAGATCATGAAATATTCATTAACGGAGTTTTTTTGTTCGCTTTTTT  
TATTTTTTTGTTCCCTAATTTTTTTTTTTTTTTTACATTTTATTAGCTATAACACTTGGCGCAAGGATATTTTATA  
TACCGGAT

CTATGTACTCAAGTACCGTGTATACTATAAAATCTCATCTCATCGCTAAAGCTAATATTGAAAAAAAAA  
AAAAAAAAAAAAAGGAAAAGGCAAATAAAAAATTTTCAATTCCGGTAACGAAGAATCGACTCTCGCCGGGTA  
ACAATTC

TTCCCTAATTTTTTTTTTTTTTTTACATTTTATTAGCTATAACACTTGGCGCAAGGATATTTTATATACCGGATA  
TAATAGATAATTTAAAAGACTACTAATTTAAAATGATGTAATATGGTAATAGGTATGGAAGAATCAGGGAGT  
TTTCAGAA

AGTATACAGTTATCCAATAGCTATGTACTCAAGTACCGTGTATACTATAAAATCTCATCTCATCGCTAA  
AGCTAATATTGAAAAAAAAAAAAAAAAAAAAAGGAAAAGGCAAATAAAAAATTTTCAATTCCGGTAACGAA  
GAATCGAC

TCACTTGTATACAACTTTACGCGTCGCGTCGCGACATGTCTATAGATTAAGTCACTTTTAAACGCCATCA  
TTCCGGGTAGTGCATATTTTCCCTTGGCGGCTAAATAGATGAAAAGGTAAAAGTTAATCTGAGAAAAAA  
CTGCATTG

ACTTCTCTTTGTTTACCTTTTTGCTTTTTATTTTTTTTTTTAATACGTGCATATATATATATATATTTAGTT  
TAGGTGAGAATACAAAGATAATTATGTATAAATGGGCGCATTTGGAACTATTTTACATACAACTGAACAA  
GTTCCGAA

ATTAGGCAGAGTATACCGAGTCGTTTGAAGTCATCTCCGGGTAGTGATTTTTATCACGTGACACTTTTTTA  
TTCCTTTTCTCTTTTCTTTTTTAAATTTTTTTTTTTTTTTTTTTCATTGATTAACCGCCTCTTCTTTATCACT  
CTCGCATT

AGATTATTAATCACACAGGAATGAAATTGTTATTAGAAAAATTATAATATACATTCTATATAGGGAAAAA  
TTTCTTCTGACTTTGAAATTTAGATGCTAATAGTTTTTTTTTATTATTTCTATTTTTTTTTTTTTTAAAGATC  
AGTTGTTT

GCATTTTCAGTAAAAATGCAGACTTTATTATTATTTAATCGTGCTTCTTATATATGACATTCTACCAAAT  
CGGTAGTCATGTATATTTTTTTCGTATATACTTTATATATTTTTTTTCTAAAAACTAATGACGGCTAAAAT  
TAAGTCAT

CCATGAAAACCTCAAATTAAGTACAGGACCCTAGGGTCTCGCTAAAAAATGACTACGCGCGCTTATAT  
AATTACTCGAATAAGACAAAAGAAAAAACCTTTCGATATGTCGTAGACACGTAAAAATGGCCCATTTAG  
TGGTAGTC

TTTTCTTTTCAACTTCTTTTTTTTTTTTTCGTTTTATGAAGCCGATGCTAATGCATCAATTTTTTTTTTTT  
GTGATGAGTTTTGAAAGAAAATGAAAAAAAAAAAAATTTCTATTATTGTGAGTGGAGTTTTTGAACAGATCA  
CCTTGTGA

AATGAAAGAAAAGAGAAGGAAAATAATGTTATAAACGATTGAAGGGATCCGCTGAGGAATGAAAAAAAAA  
ATAAGAAAGTAAGAGAAGGAAAAAAAAAAAAAGAAAAAAAAAGAAAAAAAAAGAAAAAAAAAGAGGGAATG  
ATCGAAGA

AGCGATTGTATCTGTATAGAGGTTGGTTTTCTTTTTCTTACCTTTCTCTTTTTATTTTTTTCTCGCATTGGT  
TCAAAAAAAAAAATGATGGTTTAAATTTTCGTAAAATACGAAAAATGAAGGGAAGTCCACCCGGATTCCG  
AACTGGGG

CTTCACATGCCGTGAAAGCCGACAGGGACAACGCGGATAAAAAAAAAAATTTAAAAGTAAACTACGTACGC  
GGCGGCGGACTCGAATCCTTGACTCCGACTGAGGAGACCCGAACAACGCTCCCTGCTCTCCGCTTCGGC  
GCCTTCCG

CTGACATCTACCAAGTTCTGAGATCTTTTGGTCAAACAATCTAGATTGTTCTGAAGATCAAATAATATA  
TATATATATATATATATATATATATATATATATGTTTATACACTTAACTTACGTACAAAAATATAGATTTTCGAAACG  
AATCAGTT

TCGTTTGAAGTCATCTCCGGGTAGTGATTTTTATCACGTGACACTTTTTTATTCCTTTTCTCTTTTCTTTT  
TTAAATTTTTTTTTTTTTTTTTTTTTCATTGATTAACCGCCTCTTCTTTATCACTCTCGCATTCTGTCTACTAAA  
CGGTAAAA

TTATGATATATATATATAGAAAAAGCTTACTTTTTCTTGGAGTTATTGTTATTATCATCGCGAAGAACGATT  
GTATAACCCGGTTCAACGCGAAACGAATCGTTAAACTGGTGAAATGTTAACGCGAGTGTCAGAGATATACA  
TAGTATGA

TGTAGTCGTGCCCTGCGATCCGCTTTATTACGTATATTGCCTTCACATGCCGTGAAAGCCGACAGGGACAA  
CGCGCGATAAAAAAAAAAATTTAAAGTAAAACCTACGTACGCGGCGCGACTCGAATCCTTGACTCCGACT  
GAGGAGAC

TAGAAATATGACAAAAGAAGGAAGATAGGCATAGTGAATTTTTATTTCTAATTTCACTTTTTATGTTTTTTT  
TTTTCGATATTTAATTTTTTTCACGCATTACGAATATATTTCTATATACAAACATATGTAGTAGTACTAGTAG  
CTGTCATC

GTGCAGGACCCATGGCTCGAGAAGTTGCTACCGGTGTTAATTTTTTTTTTTTATCTTAATATTAGGAAGAG  
AAAAAGCATCAGTTACGAGACTCCTGAAGGAGCGCCGAAAGTTTCTTTTTTTTTTTTTTTTTTTTTTAATTT  
TTTTTGTG

GTTTCGTTTTTTGCTTATACGACCAATCATTACCGCGTTCGGCTTTTCCAAAAAAAAAAAACTATAGTAAGG  
ATAATGAAAAGAAAAAGGGTCCCATGATTACTAAAAGCTCTAATTTCAAAAAAAGTCTTTGATAGGCA  
GCTAGGAA

TGTATGCTTGTTTTTTCTTTTCTGTTTGTGAGTCTCTATAAATTTAAATGCACTTATCTTTTTATGCAA  
AAAAAGCTGGGCGAGTTATTTGTTTCTATATTTGTATAATTTTTTTTTTTTGTGAAGATGAATATAAACTGA  
CAAAAAAT

AAGCGAGTTTTTCAACCCTTCCACAATCTTCTCTTTATTAATAAATATGTTGGAGATATCTCCTGTATGGG  
TAATATGTATATATGTAAAAAAAAAAAAAGAAAAACAAAAGAACCAAGATCGGGCTACGATGGATAAAAAA  
AAAAGAAA

AAAACCTAGATCAAATAAATAAAAAAAAAAGTAAAAACAACCATATATACTATTTTATAAGCAAAAGTAATC  
AAATTAACAAAAAAGAAAAATACAAATATTAATTTAAATTAAGGCAATAAACATATATTATACACATA  
AAAAGAAT

TTATCACGTGACACTTTTTTATTCCTTTTCTCTTTTCTTTTTTAAATTTTTTTTTTTTTTTTTTTCATTGATT  
AACCGCCTCTTCTTTATCACTCTCGCATTCTGTCTACTAAACGGTAAAAAACGAAGTGAAAAGTTCAATG  
TGGGACCC

TCGAACAAAAGTGTAAGCAGACGTGAAATAGCAAACCTTTGAATGCATTTATATATTTTTAATATACTTATA  
ACAACGGATAAATGTTTAGATCCCTTTTGAAAAAAAAAAAAAATTAGGATGAACCGAAAAAATCATACTC  
GTATTCCT

CATTGTGGGGTAGTTTTTACGAAAAAATGAAAAGTTGTAAGTATAGTATATATTTTTTTTTCTATGTAAGT  
TTTATAAGATTCTATTTCGCTATTACCACCGGTAAATTTAAAAGAACACTATTGTTACATTATATGTTTTTA  
AATCATCA

TTCCGCATTTTTATGCTCGGCATTTCCCAACAGAAGCGGATATATTTTTAAGGGCGCGGAGATGAGCCAAAC  
GGCAAGCGATATCAAATATCTGCATAATAACGGCAATCAACGCGCACGCGAATGGCCAAGAGGGTACAAT  
AGCAGCAA

TCTGTATAGAGGTTGGTTTTCTTTTTCTTACCTTTCTCTTTTTATTTTTTCTCGCATTGGTTCAAAAAAA  
AAAATGATGGTTTAAATTTTCGTAAAATACGAAAAATGAAGGGAAGGTCCACCCGGATTTCGAACTGGGGTT  
GTTCCGGAT

GATGAGCCAAGCATGATTTGAATCGGATGGATTCTCAACTGATATTTATATGGCTTTTTTCAGTTTTTTTT  
TTTTTTTTTTTTTTTTTTCAGCATCTCGAAGAGCAAAAAAAGGAACGAAAAAGTGCCACGGCAAAGAGTTTT  
TCACATTA

ATTTATTATTGAAAATGTTTTATTCTATATTGGTAGAGTTAATAAATAATTATATAATAAATTATTGTATG  
ATAATATAAATAATAGTTTATGTAATATTTTTAAGTTATTATTTATAATAAAAAAGTAACTATTGAACCTGT  
TAAATTAA

ATCATCGCATACCCAATCGGTTTTCTATTCTCACCCTTTTTCTGGAAAAATACATAGCCTAACAAGCAA  
TTTTATTTTACGTTTGTTAATTCATTATACTGATAATATTTTTGAATTTTTTTTTTTTTTTGATACATTTT  
TTTAATCG

ACCGGTGTTTAATTTTTTTTTTATCTTAATATTAGGAAGAGAAAAAGCATCAGTTACGAGACTCCTGAAGG  
AGCGCCGAAAGTTTCTTTTTTTTTTTTTTTTTTTTTTAAATTTTTTTTGTGTGGGGAAAGACCGACTACCAGT  
AATACTTT

AGAGTTTGAGAAAAAGAGATGAAAAATGCGATGAGCCAAGCATGATTTGAATCGGATGGATTCTCAACTG  
ATATTTATATGGCTTTTTTCAGTTTTTTTTTTTTTTTTTTTTTTTTTTTTTTTTCAGCATCTCGAAGAGCAAAAAAAG  
GAACGAAA

ATATATAGATAGACAACTGGTCTTCTGCATCCGGTAATAGGCATTGGCTTTAATACTAATAAAAAGCAAGAA  
AAAAGCGACACCAGTAAATTTTCAGACATCTTCGAGAATTTTTTTTCGCGCGCTTTCTATCAAAAAAATGA  
AAAATAAA

ACCATTTTTTCGTAAAAAATTTAAGCCCAAGAGTTTGAGAAAAAGAGATGAAAAATGCGATGAGCCAAG  
CATGATTTGAATCGGATGGATTCTCAACTGATATTTATATGGCTTTTTTCAGTTTTTTTTTTTTTTTTTTTT  
TTTTTCAG

TATTCTATATTGGTAGAGTTAATAAATAATTATATAATAAATTATTGTATGATAATATAAATAATAGTTTA  
TGTAATATTTTTAAGTTATTATTTATAATAAAAAAGTAACTATTGAACCTGTTAAATTAAATATATTCAA  
AAACATTA

AAGTTGTCTTAAGGAAAAAATAAAGAAAATATTGAAAATAATAAGTTTTTTTCTGTAAAAGTGTAT  
AAAATATATAGGAGATCCCGTCAAATAATAGAAAAAATTTTTTGCACATATACCTGTAGCCCCAGGAA  
TACTGAAA

GTAGTCAACAAAGTTGTCTTAAGGAAAAAATAAAGAAAATATTGAAAATAATAAGTTTTTTTCTGT  
AAAAGTGTATAAATATATAGGAGATCCCGTCAAATAATAGAAAAAATTTTTTGCACATATACCTGTA  
GCCCCAGG

ATTAGGAAGAGAAAAAGCATCAGTTACGAGACTCCTGAAGGAGCGCCGAAAGTTTCTTTTTTTTTTTTT  
TTTTTTAATTTTTTTTGTGTGGGGAAAGACCGACTACCAGTAATACTTTAAAGATATTATTAAGAAATC  
CCGAAAAA

GGCAGTAGGCGATGAAAGGAAGTTTTTTAATGTCATTAAGAAAAAGATAGGGAACCTTCTATTTCTGTCTT  
TCATATATATATATATATATATATATATATATATATATATATATATATATATATATATATATATATAT  
GAATATAA

CCGCTTTTTAATTTTTAATCAATGTTACATACCTAGCGTAATTTTTCTATATATAAATATCAGCTTTATA  
TAAATATATTATTGAAACTGTACCTATAATAATAAATTTAAATTAAGTAAATACAAATGCTTCAAATTT  
GTTAGTAT









AATGACATTAATGACTTTTATGACAACCATGATAGTACAGAAGAGAGACCTTTTTTCTTTTTTTTTTTTTTTTT  
TCTTTTTTTTTTTTTTTTTTTTTTTTTTTTTTTTTTTTTTTTTTTTTTTTTTTTTTTTTTTTTTTTTTTTTTTTT  
TCTATTCT

CAAACAATCGCGCGGAACGTCAAGCGTATATACTATATAAAAAAGAAAAACAAAAAAATCAATAACCCATTA  
AAGATACATAATCAATAAAAAACGATATTA AAAAGCACGTAAAGTACTTAATATTTTTTTTTTAATAATAGACA  
TTTTTCGCC

CTTCTTTACCCGGCTCTCCGTCGGGTAAGATATATGTGCTAGCGCCACGCGATGGCTGGTTTGTCTTTTTTA  
AGTTCTTAATATTTATTTTTATATTTTGATTTTTTTTTTTTTTTTTTTTTTTTTTTTTTTTTTTTTTTTTTT  
TGTATTAA

TTTTTTTTTTGTTACCCCTAACGATATTACAGCTATTTCTTAATGGCTTTTAATGACATTAATGACTTTTATG  
ACAACCATGATAGTACAGAAGAGAGACCTTTTTTCTTTTTTTTTTTTTTTTTTTTTTTTTTTTTTTTTTTTT  
TTTTTCTT

TATATGTGCTAGCGCCACGCGATGGCTGGTTTGTCTTTTTTAAGTTCTTAATATTTATTTTTATATTTTGAT  
TTTTTTTTTTTTTTTTTTTTTTTTTTTTTTTTTTTTTTTTTTTTTTTTTTTTTTTTTTTTTTTTTTTTTTTT  
GTACTGCG

GTTGTACTTGACATTCTAAGGCATCCTGCAACTGTTCTGTGGAGCTATTAATCTTTATAGTAAATTTTTT  
TTTACTTTTTTTTTTTTTTTTTTTTTTTTTTTTTTTTTTTTTTTTTTTTTTTTTTTTTTTTTTTTTTTTTTTTT  
TGTCATTT

GCTATTTCTTAATGGCTTTTAATGACATTAATGACTTTTATGACAACCATGATAGTACAGAAGAGAGACCTT  
TTTTCTTTTTTTTTTTTTTTTTTTTTTTTTTTTTTTTTTTTTTTTTTTTTTTTTTTTTTTTTTTTTTTTTTTTT  
GAATCTAG

ATAGTACAGAAGAGAGACCTTTTTTCTTTTTTTTTTTTTTTTTTTTTTTTTTTTTTTTTTTTTTTTTTTTTTT  
TTTTTTTTTTTTTTTTTTTTTTTTTTTTTTTTTTTTTTTTTTTTTTTTTTTTTTTTTTTTTTTTTTTTTTTT  
AATTTTAA

AATGAACAAGGAATGCTGTCTTGGGTTTTTTTTCCCTTTGCGAATACCCGGGCTGCCAAAATAGAAAAGGAA  
CAAATGGTAGGTCTTTAAGATAAGAAAGATAAGATAAGACATCTTTTTTTTTTTTTTTTTTTTTTTTTTTTT  
TTTTCCGA

TGTGAAATGGTTCTAGTTAGTCACGTGCAGCTTTTTAAAAATATTTTAAAACATTTTAAAAAATATACATT  
TTTTTATTATTTTTTATATATTAATGTTAAAATTTATTTATGTATTTGTCTTCCGAAAAGTAAAATAACG  
TTCAAATT

AGAGAGACCTTTTTTCTTTTTTTTTTTTTTTTTTTTTTTTTTTTTTTTTTTTTTTTTTTTTTTTTTTTTTTTT  
TGAGCCTTTTTCGAATCTAGACTCTATGTGAGTCTATTCTCGATGGGGAGTATCGGAAATTGAATTTTAATT  
CGAATGAC

TCTTTTCTTTTTTTTTTTTTTTTTTTTTTTTTTTTTTTTTTTTTTTTTTTTTTTTTTTTTTTTTTTTTTTTT  
GCACTGAAATGGCGCAGGAACTGACCTCATCGCATGCCAACGAAGATTGAAAAAATTAACATATAAGGC  
TTATGAAA

TTCAATTTTTTAGATTTTAATTAGCGGTTTTTTTTTTGGTTTTTCTTAAGATTGGTTTTTATGATTTTTTTTT  
TTCTTTTTCAAATTTTTTATTATTTTTTCAATTTTTTCTTTTTTAAAAGGCTTGTGGTTGACTAGTCCTTTT  
TTTTTAGG

GTTGGTGGATCGGCCGTACGTGTTTAGTGAGGGTACTATTTAACTTACTTTAAATAGCAAAATAGGAAAA  
GCTACGAGAACTGAAAAGTAAAAAAGTAAAAAAGTAAAAAAGTAAAAAAGTAAAAAAGTAAAAAAGTAAAA  
TTGCCAGT

ATTGAGTTGTTGTGAAATGGTTCTAGTTAGTACGTGCAGCTTTTTAAAAATATTTTAAAACATTTTAAAA  
AATATACATTTTTTTTATTATTTTTTTTATATATTAATGTTAAAATTTATTTATGTATTTGTCTTCCGAAAAG  
TAAAATAA

GCTTTTGTTCGTTGGTGGATCGGCCGTACGTGTTTAGTGAGGGTACTATTTAACTTACTTTAAATAGCAA  
AATAGGAAAAGCTACGAGAACTGAAAAGTAAAAAAAAAAAAAAAAAATAAAAAAAAAAGAAAAAAAAAGG  
AGAAACAT

CTTAAAAAAAAAAAAAAAAAAGCGTCTTAGAGGGAATATAAGAGAAAAGAAGAGATAGCATAACACAT  
GATTTATTTTTATTTTTGCGTTTTTTTTTTTTCTTAATTGTTTATCAATGTATCTGTGAGAGTATCTACAT  
AAAAAAA

CCGCGCCAGTATATTAGTTACTAATCATAACAGTTTCTTGTTTCAATTTTTTAGATTTTAAATTAGCGGTTTT  
TTTTTGTTTTTCTTAAGATTGGTTTTATGATTTTTTTTTTTTTCTTTTTCAAATTTTTTTATTATTTTTTCA  
ATTTTTCT

TACTATATAAAAAGAAAACAAAAAATCAATAACCCATTAAGATACATAATCAATAAAAAACGATATTA  
AAAAGCACGTAAAGTACTTAATATTTTTTTAATAATAGACATTTTCGCCCTTACTTTTTAAATAAAAAACA  
TAAAAAAA

ATAAAAATACACCTTCGTACAAGGTGCTAATAATGTTGAGAATTCGAAATTCCTTTTTAAAGGCGTATTCC  
GTATTGAATGATTGAAAAATTTATTTCTTTTTTATTTCTTTTTTTTTTTTTTTTTTTTTTTTTTACGCCG  
ATGCTCAT

TTACCCCTAACGATATTACAGCTATTTCTAATGGCTTTTAAATGACATTAATGACTTTATGACAACCATGA  
TAGTACAGAAGAGAGACCTTTTTTCTTTTTTTTTTTTTTTTTCTTTTTTTTTTTTTTTTTCTTTTTCTTTT  
TTTTTTTT

CGGCCGTACGTGTTTAGTGAGGGTACTATTTAACTTACTTTAAATAGCAAAATAGGAAAAGCTACGAGAA  
ACTGAAAAGTAAAAAAAAAAAAAAAAAATAAAAAAAAAAGAAAAAAAAAGGAGAAACATGATTGCCAGTAC  
TCGCAAGA

CGATATTACAGCTATTTCTAATGGCTTTTAAATGACATTAATGACTTTATGACAACCATGATAGTACAGAA  
GAGAGACCTTTTTTCTTTTTTTTTTTTTTTTTCTTTTTTTTTTTTTTTTTCTTTTTTCTTTTTTTTTTTTT  
GAGCTTT

CATTTTTTAAAAGTTTTCAATGAAAAATGAAAGAGTAATGAACAAACATATTTTTTTTATAAAATGCATA  
AAAACATATAGATATATATATATTTACGTGGAAAAATGTTAAAACATTTGATAAGAAAAACGCTCAAAAC  
AAGTAGTA

ATTCGCCAGTAAATGCGTATCTTGAGAGAAAATATCAATTTGTTATTTGTATATATAAAAAATTAAAAAA  
AAAAAAAAAAAAATACTCAAATACTCAAATACGTATACATTATACTGAAATACTTCGCTTGTCTTCGAATCT  
AAATCCTC

ACCTTCGTACAAGGTGCTAATAATGTTGAGAATTCGAAATTCCTTTTTAAAGGCGTATTCCGTATTGAATG  
ATTGAAAAATTTATTTCTTTTTTATTTCTTTTTTTTTTTTTTTTTTTTTTTTTTTTTTACGCCGATGCTCATCG  
CAGAAAAT

ATTGATTTTTATTTTTTTTTGTTACCCCTAACGATATTACAGCTATTTCTAATGGCTTTTAAATGACATTA  
TGACTTTATGACAACCATGATAGTACAGAAGAGAGACCTTTTTTCTTTTTTTTTTTTTTTTTCTTTTTTTT  
TTTTTTTCT

CGGCTCTCCGTCCGGTAAGATATATGTGCTAGCGCCACGCGATGGCTGGTTTGTCTTTTTAAGTTCTTAAT  
ATTTATTTTTTATTTTTGATTTTTTTTTTTTTTTTTTTTTTTTTTTCCATTAGTGAATGACAGCAATGTATTAAGC  
TGCTGCCG

GATAAGTACAAGTCCAATCGGACTGATTTCGTAAAAATTTTTGCAGACATTTTTGATATATATTCAATTCAT  
ATTTTATCTCTTTTTTTTTTTTTTTTTTTTTTTTTCAGACGTGGAATGGTGGGAAAGCCAAAATGTCACTGACCGCG  
CTAAAAGT

TACACAATAACGCCGACGAAAAATCTAATTAAGAAGGACACTATAAATAACAAACAATCGCGCGGAACGTC  
AAGCGTATATACTATATAAAAAAGAAAACAAAAAAAATCAATAACCCATTAAGATACATAATCAATAAAAA  
ACGATATT

AACAGTCCGTAAACAAACACATTCCACAAAAACCCGCACCGCGAAAAAATAAAAAAACAGGAAAAAACGC  
GAAATGTCCGTAACCTTTACCCGGTAATAGTCACGTGATAAAGGTGCATTGGTCTAGCTGGCTGTTCTGGCC  
AACGCGAC

TTTTTCTTTTTTTTTTTTTTTTTTTTTTTTTTTTTTTTTTTTTTTTTTTTTTTTTTTTTTTTTTTTTTTTT  
CGAATCTAGACTCTATGTGAGTCTATTCTCGATGGGGAGTATCGGAAATTGAATTTTAATTCGAATGACTT  
CTAATGCA

AGGTTCAATGGCCTCTTTACCATGAAAAAAAAAAAAAAAAAAAAAAAAAAGGTAAGGAAAAAGAGTATTTTC  
AATTCGTTTCTGAACATATAAATAAATAACCGAAAAATTAGCCCTTGAACATAATTAACACTCTTCTTT  
GATATTTA

TCCTTTTTAAAGGCGTATTCCGTATTGAATGATTGAAAAATTTATTTCTTTTTTTATTTCTTTTTTTTTTT  
TTTTTTTTTTTTTTTTTACGCCGATGCTCATCGCAGAAAATTTTTCTTCAGTTTATTTGTCTTATAAAAAGA  
CTGTCCTA

CTTTCCTCCGCAGGAAATGAAAGATGAACCACCCATTACATTCGATTTTTTTTTTTAATTATATTTTTGAC  
TATTATTTAATCATTAAAAACACATATATTTTCATAAATTCGTAAGGTCGTTAGTTCTATCGTAAAAGTGAA  
AAAGTTTT

GTCTACTATAATAATTCACCAAAAAACAGCAGAGCACGTCCTATATATATATATATATATATATATATATA  
TACATATATATATACGAATATATTTATGACAGTCTAAATCGTTGCTCCTGTTCAATTTTAACGCTCTTTTA  
TAACTGCT

AAGTTTTCAATGAAAAAATGAAAGAGTAATGAACAAACATATTTTTTTTTTATAAAATGCATAAAAAATATA  
GATATATATATATTTACGTGGAAAAATGTTAAACTATTGATAAGAAAAACGCTCAAAACAAGTAGTAAG  
CAGGCTTT

ATATAACCAGATAAAAAATACACCTTCGTACAAGGTGCTAATAATGTTGAGAATTCGAAATTCCTTTTTTAA  
GGCGTATTCCGTATTGAATGATTGAAAAATTTATTTCTTTTTTTATTTCTTTTTTTTTTTTTTTTTTTTT  
TTTTACGC

CTATACAAAAAGTGTGCTTTTTTCTTCTATTTTTTTTTTTTTTTAATGACTTTGTGTGTTTATTACCCTTTAA  
TTAATTACCAAAAAAAAAAATAAATACTACGTTTTTAATTTCTAATTTATCAAATTTCTTTTTTTTACATATA  
ACTATATA

TTCTAGTTAGTCACGTGCAGCTTTTTAAAAATATTTTTAAACATTTTTAAAAATATACATTTTTTTTATTAT  
TTTTTTATATATTAATGTTAAATTTATTTATGTATTTGTCTTCCGAAAAGTAAAATAACGTTCAAATTTG  
GTATTTAA

AATTCGAAATTCCTTTTTTAAAGGCGTATTCCGTATTGAATGATTGAAAAATTTATTTCTTTTTTTATTTCT  
TTTTTTTTTTTTTTTTTTTTTTTTTTTTTACGCCGATGCTCATCGCAGAAAATTTTTCTTCAGTTTATTTGTCT  
TATAAAAA

CGCCGACGAAAAATCTAATTAAGAAGGACACTATAAATAACAAACAATCGCGCGGAACGTCAGCGTATAT  
ACTATATAAAAAAGAAAACAAAAAAAATCAATAACCCATTAAGATACATAATCAATAAAAAACGATATTTAA  
AAAGCACG

AAATCTAATTAAGAAGGACACTATAAATAACAAACAATCGCGCGAACGTCAAGCGTATATACTATATAAA  
AAGAAAACAAAAAATCAATAACCCATTAAAGATACATAATCAATAAAAAACGATATTA AAAAGCACGTA  
AAGTACTT

TAATAGTCATAATGAACAAGGAATGCTGTCTTGGGTTTTTTTTCCCTTTGCGAATACCCGGGCTGCCAAAAT  
AGAAAAGGAACAAATGGTAGGTCTTTAAGATAAGAAAGATAAGATAAGACATCTTTTTTTTTTTTTTTTTT  
TTTTTTTT

CAAGCGTATATACTATATAAAAAAGAAAACAAAAAATCAATAACCCATTAAAGATACATAATCAATAAAA  
AACGATATTA AAAAGCACGTAAAGTACTTAATATTTTTTTTTAATAATAGACATTTTCGCCCTTACTTTTTAA  
ATAAAAA

CAAGGATCGTGCTTTTTGTTGTTGGTGGATCGGCCGTACGTGTTTAGTGAGGGTACTATTTAACTTACTT  
TAAATAGCAAAATAGGAAAAGCTACGAGAACTGAAAAGTAAAAAAAAAAAAAAAAAATAAAAAAAAAAGA  
AAAAAAA

AAGGTGCTAATAATGTTGAGAATTCGAAATTCCTTTTTAAAGGCGTATTCCGTATTGAATGATTGAAAAAT  
TTATTTCTTTTTTATTTCTTTTTTTTTTTTTTTTTTTTTTTTTTACGCCGATGCTCATCGCAGAAAATTT  
TTCCTTCA

TGTTCTTGGCTTTACAAGCGCATTAAACATTTAATATTATATAATATTTATAATATACATGTTATTCCAAT  
AGTAAAAAAAAAAAAAAAAATGAAATGAAATGAAAATTCGCCCTTAAAAATGAACAACCTTTTACCAG  
CCGGCATT

TAATGTTGAGAATTCGAAATTCCTTTTTAAAGGCGTATTCCGTATTGAATGATTGAAAAATTTATTTCTTT  
TTTTATTTCTTTTTTTTTTTTTTTTTTTTTTTTTTTTTTACGCCGATGCTCATCGCAGAAAATTTTCTTTCAGT  
TTATTTGT

GCTGCCAAAATAGAAAAGGAACAAATGGTAGGTCTTTAAGATAAGAAAGATAAGATAAGACATCTTTTTTT  
TTTTTTTTTTTTTTTTTTTTTTTTTTTTTCCGATAACAAAGAAGAATCTTCCGGTCTCTTCTTACTGCTGTTACT  
GCTTATCA

AAATGCGTATCTTGGAGAAAATATCAATTTGTTATTTGTATATATAAAAAATTA AAAAAAAAAAAAAAAAAA  
AATACTCAAATACTCAAATACGTATACATTATACTGAAATACTTCGCTTGTCTTGAATCTAAATCCTCTC  
TCTCTTCT

CGCGGAACGTCAAGCGTATATACTATATAAAAAAGAAAACAAAAAATCAATAACCCATTAAAGATACATA  
ATCAATAAAAAACGATATTA AAAAGCACGTAAAGTACTTAATATTTTTTTTTAATAATAGACATTTTCGCCCT  
TACTTTTT

TGCTGATTTTTTATTTAATGGTTACCCGACTTCTTTACCCGGCTCTCCGTCCGGTAAGATATATGTGCTA  
GCGCCACGCGATGGCTGGTTTGTCTTTTTAAGTTCTTAATATTTATTTTTATTTTTGATTTTTTTTTTTTT  
TTTTTTTT

TATTTGGAATGGGCATCGATTTAAAATTTTCATTTAGTGGGATGTAAAAAATTTTAGTTCCGCGGTAC  
AGTTTTTCAACATTTGCCATATGATGTAGAATGGCGCTATCAAATCATCACTCTTATTACAGGTGAATCGC  
GCGCTAAC

CTAATCATAACAGTTTCTTGTTCATTTTTTAGATTTAATTAGCGGTTTTTTTTTGGTTTTTCTTAAAGAT  
TGGTTTTATGATTTTTTTTTTCTTTTTCAAATTTTTTATTATTTTTTCAATTTTTCTTTTTAAAGGCT  
TGTGGTTG

AGTTTCTTGTTCATTTTTTAGATTTAATTAGCGGTTTTTTTTTGGTTTTTCTTAAAGATTGGTTTTATG  
ATTTTTTTTTTCTTTTTCAAATTTTTTATTATTTTTTCAATTTTTCTTTTTAAAGGCTTGTGGTTGAC  
TAGTCCTT

CTAATCATGACATTTTTTAAAAGTTTTCAATGAAAAAATGAAAGAGTAATGAACAAACATATTTTTTTTTAT  
AAAATGCATAAAAAACATATAGATATATATATATATTTACGTGGAAAAATGTTAAAACATTTGATAAGAAAAA  
CGCTCAA

CACCCATTACATTCGATTTTTTTTTTAATTATATTTTTGACTATTATTTAATCATTAAAAACACATATATT  
TCATAAATTCGTAAGGTCGTTAGTTCTATCGTAAAAGTAAAAAGTTTTGAGCCAGTTTTCAAAAACCCG  
AGGATCCC

AGTGTGCTTTTTTCTTCTATTTTTTTTTCTTTAATGACTTTGTGTGTTTATTACCCTTTAATTAATTACCA  
AAAAAAAATAAACTACGTTTTTAATTTCTAATTTATCAAATTTCTTTTTTTCACATATAACTATATATT  
TATATGTC

AAAGAGTAATGAACAAACATATTTTTTTTTATAAAATGCATAAAAAACATATAGATATATATATATTTACGTG  
GAAAAATGTTAAAACATTTGATAAGAAAAACGCTCAAACAAGTAGTAAGCAGGCTTTTTTTTTTTTTG  
TGCTTGTT

CTTTTTTTTTTTTTTTTTTTCAGACGTGGAATGGTGGGAAAGCCAAAATGTCACTGACCGCGGCTAAAAGTT  
AAAAAATACATGAGACGACATTCTTTTATGTATATATATTTACACATGTATACAAACAAATACACACGCAA  
GTAGAGAG

TCACGTGCAGCTTTTTTAAAATATTTTTAAAACATTTTTAAAAATATACATTTTTTTTATTATTTTTTTATAT  
ATTAATGTTAAAATTTATTTATGTATTTGTCTTCCGAAAAGTAAAATAACGTTCAAATTTGGTATTTAAG  
ATATCTGC

TGACCATATGAGTAAGCAGTATATAACGCGAGGTTCAATGGCCTCTTTACCATGAAAAAAAAAAAAAAAA  
AAAAAAAAGGTAAGGAAAAAGAGTATTTTCAATTCGTTTCTGAACATATAAATATAAATAACCGAAAAAT  
AGCCCTTG

TTTTTTTTTTTTTTTTTCCGTGCGTTCTCCCCGTGCCTTGATAAGCAATAATGGAAAAATAAAAAATAGCAG  
CAATTGGTTATACAATGTATATATAAAACATGAATGATTGAATAATTTACAAGCGAAATAATCGCATTATA  
TACGTGGC

AGGCGTATTCGATTTGAATGATTGAAAAATTTATTTCTTTTTTTTATTTCTTTTTTTTTTTTTTTTTTTTT  
TTTTTACGCCGATGCTCATCGCAGAAAATTTTCTTTCAGTTTATTTGTCTTATAAAAAGACTGTCTTACG  
CTCAAATA

TAAGTAAAAGAACGGATTATGAAAGAAAACGCGCATAATATATATATGTATGTATTTTCTAATTTATATT  
AGCAACTAAATTAATTACATCAATACTATTTTTTTTTTTTTTACTTTACAAGGTTTATTTCAAAGTCTTCAA  
CAATTTTT

ATATTAGTTACTAATCATAACAGTTTCTTGTTTCAATTTTTTAGATTTTAATTAGCGGTTTTTTTTTTGGTTT  
TTCTTAAGATTGGTTTTATGATTTTTTTTTTTTTCTTTTTCAAATTTTTTTTATTATTTTTTTCAATTTTTCTTT  
TTAAAAGG

TTTTACTTTTTTTTTTTTTTTTTTTTTTTTTTTTATTATTTACAAGCGTCTATATATTTTCTATTATAGAATA  
TTGTCATTTATTACATTGGTTCATCTGTAAATCTCATCAAACGGTCTCGTATCGGCGAAGCAACTGTCCCA  
AACTTCAT

AGGTTAAAATAGAAGGCCGATGAGGCCTTATGTAAGTCTAATATGGTATTCTTAAAAAAAAAAAAAAAAAAAA  
AAAGCGTCTTAGAGGGAATATAAGAGAAAAGAAGAGATAGCATAACACATGATTTATTTTTATTTTTGCGT  
TTTTTTTT

GCCTCTTTACCATGAAAAAAAAAAAAAAAAAAAAAAAAAAGGTAAGGAAAAAGAGTATTTTCAATTCGTTTC  
TGAACATATAAATATAAATAACCGAAAAATTAGCCCTTGAACATAATTAACACTCTTCTTTGATATTTAA  
TCACAAGT

TCATGTGTACGTTGTACTTGACATTCTAAGGCATCCTGCAACTGTTCTGTGGAGCTATTAATCTTTATAG  
TAAATTTTTTTTTTACTTTTTTTTTTTTTTTTTTTTTTTTTTTTTTTTTATTATTTACAAGCGTCTATATATTTTCTAT  
TATAGAAT

CTTTTTAAAAATATTTTTAAACATTTTTAAAAATATACATTTTTTTATTATTTTTTTATATATTAATGTTA  
AAATTTATTTATGTATTTGTCTTCCGAAAAGTAAAATAACGTTCAAATTTGGTATTTAAGGATATCTGCGT  
TTAGGCGC

AAACAAACACATTCCACAAAAACACCGCACCCGCAAAAAAAAAAAAAAAAAACAGAAAAAACGCGAAATGTCCG  
TAACTTTACCCGGTAATAGTCACGTGATAAAGGTGCATTGGTCTAGCTGGCTGTTCTGGCCAACGCGACAG  
CAGGGTTC

TGTTTTAGTGAGGGTACTATTTAACTTACTTTAAATAGCAAAATAGGAAAAGCTACGAGAACTGAAAAGT  
AAAAAAAAAAAAAAAAAAAAAAAAAAAAAAAAAGAAAAAAAAAGGAGAAACATGATTGCCAGTACTCGCAAGAAC  
TAAGATAG

TCTTCCGCTTTAAAAGTTGAAAATTCCTCAATGAAAAGGGTGTCTTTGGCTTTACAAGCGCATTAAACATT  
TAATATTATATAATATTTATAATATACATGTTATTCCAATAGTAAAAAAAAAAAAAAAAAATGAAAATGAAAA  
TGAAAAAT

ACAAGGTTTTATTTTGCTTTGGTTGCAAATTTTCATCGCTTATAGAAGACATATTTTGATGTAAAACCTTG  
ATATACTTCCTTTTTGCCTTATCTTTCACTGTTCCATCTCTTTCTTTTTTTTTTTTTTTTTTTTTTTTTTT  
TTTTTTTT

TGAAAATAAAATTCGCCAGTAAATGCGTATCTTGGAGAAAATATCAATTTGTTATTTTGTATATATAAAAA  
ATTAATAAAAAAAAAAAAAAAAAAATACTCAAATACTCAAATACGTATACATTATACTGAAATACTTCGCTTGT  
CTTCGAAT

CGTATTGAATGATTGAAAATTTATTTCTTTTTTTATTTCTTTTTTTTTTTTTTTTTTTTTTTTTTTTTTACGCC  
GATGCTCATCGCAGAAAATTTTCTTTCAGTTTATTTGTCTTATAAAAAGACTGTCCTACGCTCAAATAAC  
TTATACTT

CCATTTTTTTTATTGATTTTATTTTTTTTTTTGTTACCCCTAACGATATTACAGCTATTTCTAATGGCTTTTA  
ATGACATTAATGACTTTATGACAACCATGATAGTACAGAAGAGAGACCTTTTTTTCTTTTTTTTTTTTTTTTT  
CTTTTTTT

ATTGCTGATTTGACCATATGAGTAAGCAGTATATAACGCGAGGTTCAATGGCCTCTTTACCATGAAAAAA  
AAAAAAAAAAAAAAAAAAGGTAAGGAAAAAGAGTATTTTCAATTCGTTTCTGAACATATAAATATAAATAA  
CCGAAAAA

TCATTCCCTTCGCGCCAGTATATTAGTTACTAATCATAACAGTTTCTTGTTTCAATTTTTTAGATTTTAAT  
TAGCGTTTTTTTTTTGGTTTTTCTTAAGATTGGTTTTATGATTTTTTTTTTTTTCTTTTTCAAATTTTTTTAT  
TATTTTTT

TAATATATTCTAAGTAAAAAGAACGGATTATGAAAGAAAACGCGCATAATATATATATATATATATATATAT  
AATTTATATTAGCAACTAAATTAATTACATCAATACTATTTTTTTTTTTTTTACTTTACAAGGTTTTATTCCA  
AAGTCTTC

GAACAAACATATTTTTTTTTATAAAATGCATAAAAAACATATAGATATATATATATATTTACGTGGAAAAATGTT  
AAAATATTGATAAGAAAAACGCTCAAAACAAGTAGTAAGCAGGCTTTTTTTTTTTTTTTGCTGCTTGTTTT  
AGAGAACC

TAGATTTTAATTAGCGGTTTTTTTTTTGGTTTTTCTTAAGATTGGTTTTATGATTTTTTTTTTTTTCTTTTTCA  
AATTTTTTTATTATTTTTTTCAATTTTTTCTTTTTAAAAGGCTTGTGGTTGACTAGTCTTTCTTTTTAGGGG  
TTGCTTTC





TATTTCTACGCTATACAAAAAGTGTGCTTTTTTCTTCTATTTTTTTTTCTTTAATGACTTTGTGTGTTTAT  
TACCCTTTAATTAATTACCAAAAAAAAAATAAACTACGTTTTTAATTTCTAATTTATCAAATTTCTTTTT  
TTCACATA

CGTGTATTATTTCAAAGAGCGAAAAAGAAGGCGCGTCGCGTCGACGCGCCTTTTTAGGCTAGAAAATAACA  
GAAAACAAAAACAAAAACAAAAAAGGCGAAAAACAAACGAAAAACAAACGACAGTAGATAGAGGAGAA  
GGTTTTTG

ATTGAGTTGTATTGCTGATTTGACCATATGAGTAAGCAGTATATAACGCGAGGTTCAATGGCCTCTTTACC  
ATGAAAAAAAAAAAAAAAAAAAAAAAAAAGGTAAGGAAAAAGAGTATTTTCAATTCGTTTCTGAACATATAA  
ATATAAAT

TCAAGTTTGTTCATGGAATATGAAATAGAAAAGGAGTGATGGTTTTCTTTATTTTTAACCTGTAAAATTTT  
TTTTTTTTTTTTTTTTACTCTTATATATGTATATGTTTGTGTTTATTTCTGAATAAAAATTTATAAGAAC  
CAAATTAA

TCATTTTTTTTTGATTGTCTTGCAGAAGTTGAAGAGGTCTTTACTGTAGCATATACAAGTGCTTAATTCT  
TGATTTTTATTTCTTTTTTTCATAATACAGTTATAGAAAAAGCCCCATTCTCAGTTTATGAAAAACGC  
GATATCAC

TTTTTTCTCGTCTACTATAATAATTCACCAAAAAACAGCAGAGCACGTCCTATATATATATATATATATA  
TATATATATATACATATATATATACGAATATATTTATGACAGTCTAAATCGTTGCTCCTGTTCAATTTTAA  
CGCTCTTT

AAAGAAAACAAAAAAATCAATAACCCATTAAAGATACATAATCAATAAAAAACGATATTA AAAAGCACGT  
AAAGTACTTAATATTTTTTTAATAATAGACATTTTCGCCCTTACTTTTTAAATAAAAAACATAAAAAAATA  
TCAAATGT

AAAAAATCAATAACCCATTAAAGATACATAATCAATAAAAAACGATATTA AAAAGCACGTAAAGTACTTA  
ATTTTTTTTTAATAATAGACATTTTCGCCCTTACTTTTTAAATAAAAAACATAAAAAAATATCAAATGTAC  
ATCAAAAT

ATGCTATTGTGAGGTTAGAATGAAAATAAAATTCGCCAGTAAATGCGTATCTTGGAGAAAATATCAATTTG  
TTATTTTGTATATATAAAAAATTA AAAAAAAAAAAAAAAAAAATACTCAAATACTCAAATACGTATACATTA  
TACTGAAA

AAAGATGAACCACCCATTACATTCGATTTTTTTTTTAATTATATTTTTGACTATTATTTAATCATTA AAAA  
CACATATATTTCAATAATTCGTAAGGTCGTTAGTTCTATCGTAAAAGTGAAAAGTTTTGAGCCAGTTTTTC  
AAAAACCC

CGATTGTAAATTTATTTCTCGTCTACTATAATAATTCACCAAAAAACAGCAGAGCACGTCCTATATATATA  
TATATATATATATATATATATACATATATATATACGAATATATTTATGACAGTCTAAATCGTTGCTCCTGT  
TCAATTTT

ACACTTAATTCGTATCATTGAAACGAAAAAGAAATGTGGATTTTCTTTTTCAATTTTTTTTTTTTTTCAT  
GATTTTTTTGGGCGACGCAGAGATGAGATAAAAAAATTTTTCAACTGCTATTCTCAATCGAATTTTTTTTG  
TTATCCTC

ATTTTCAATTTTCATCTTTTTTTTTCACGATGCGAAGTTTCTTAGATAATTATCGCCATATACGAAACGCGT  
TAGGAAACGCGTTCTTTCTTTATAATAAGCAATATTATATCAACTTAAGGTGGAAGTAATGTGGCAAAAT  
CGATAGCG

TGAGGCCTTATGTAAGTCTAATATGGTATTCTTAAAAAAAAAAAAAAAAAAAAAAGCGTCTTAGAGGGAATA  
TAAGAGAAAAGAAGAGATAGCATAACACATGATTTATTTTTATTTTTGCGTTTTTTTTTTTTCTTAATTTG  
TTATCAAT

TTCAAAGTACGTATATATGTATATACCATCTTTTTTTACGTTAAAATAGTGAAAAAGGAAAGGAGGAAAG  
AAAAACTAATATAATTAATTGTATTATATATGTACTTTTCATTTTGAATGTGAAAAAATTCAGGCGGA  
AAAAATTG

GAAAAGAAGGCGCGTCGCGTCGACGCGCCTTTTTAGGCTAGAAAATAAACAGAAAAACAAAAACAAAAACAA  
AAAAAGGCGAAAAAACAAACGAAAAAACAAACGACAGTAGATAGAGGAGAAGGTTTTTACAGGTTTGTGT  
AATTGGTT

GGGCATCGATTTAAAATTTTCATTTAGTGGGATGTAAAAAAAATTTTAGTTTCGCGCGTACAGTTTTTCAA  
CATTTGCCATATGATGTAGAATGGCGCTATCAAATCATCACTCTTATTACAGGTGAATCGCGCGCTAACAC  
TTCAATTA

GACTGATTCGTAAAAATTTTTGCAGACATTTTTGATATATATTCAATTCATATTTTATCTCTTTTTTTTTT  
TTTTTTTTTCAGACGTGGAATGGTGGGAAAGCCAAAATGTCACTGACCGCGGCTAAAAGTTAAAAAATACAT  
GAGACGAC

TATATATATATATATATACGTGCATTTTTCTTAAAGAAATATAACTTTTTCTTGTACTGCCTGCAATCTC  
TATTCTTCATTCATCACACATCTATTCAAACGCGTTAAAATTTTTTGTAGCCTATAAGTAAAACGCGTC  
GCGTGTAT

ATATGGTATTCTTAAAAAAGCGTCTTAGAGGGAATATAAGAGAAAAGAAGAGATAG  
CATAACACATGATTTATTTTTATTTTTGCGTTTTTTTTTTTTCTTAATTGTTTATCAATGTATCTGTGAGA  
GTATCTAC

AAAATTTCTCCATTTTTTTATTGATTTTTATTTTTTTTTGTTACCCCTAACGATATTACAGCTATTTCTTA  
ATGGCTTTTAATGACATTAATGACTTTATGACAACCATGATAGTACAGAAGAGAGACCTTTTTCTTTTTT  
TTTTTTTT

TACCCCTTCCACAGATATATAATATATTCTAAGTAAAAAGAACGGATTATGAAAGAAAACGCGCATAATA  
TATATATGTATGTATTTTCTAATTTATATTAGCAACTAAATTAATTACATCAATACTATTTTTTTTTTTTT  
ACTTTACA

TTTACAAGCGCATTAAACATTTAATATTATATAATATTTATAATATACATGTTATTCCAATAGTGAAAAAA  
AAAAAAAATGAAAATGAAAATGAAAATTCGGCCCTTAAAATGAACAACCTTTTACCAGCCGGCATTAA  
ATGTCGTG

CTTTTGCAGTTTGCTTTTATCCCTGTGATGAAAAAATAAACTAAAATTTTTTGCCGGCGCATCGAAAA  
AATCTGTTACCCGACCCGTTATTGGTGATAATACCCATTTTTAACGCGATCACATATCATAAACTGCAGTG  
AGAGGGTC

TTTTTTTTCTTTAATGACTTTGTGTGTTTATTACCCTTTAATTAATTACCAAAAAAATAAACTACGTT  
TTTAATTTCTAATTTATCAAATTTCTTTTTTTTACATATACTATATTTTATATGTCACCCCTATTCAAG  
TTCGTTAG

ATGAAGATTTTTAATTTGAAGTCGAGTACATCTCTTTCAGTGAGTAACCTTATATATTTTTGAAGTTAACAT  
CCTTATTCTTTTTTATATTTTTATTTTTTTTTATGTTTATTTTCTATTACTGATTTTCACAAAGAAAGGTA  
AAAAAAA

TATATACCATCTTTTTTTACGTTAAAATAGTGAAAAAGGAAAGGAGGAAAGAAAAACTAATATAATTAAT  
TGTATTATATATGTACTTTTCATTTTGAATGTGAAAAAATTCAGGCGGAAAAAATGAAAAATCAAAC  
ACTGCGCT

GGGTACTATTTAACTTACTTTAAATAGCAAAATAGGAAAAGCTACGAGAACTGAAAAGTAAAAAATA  
AAAAAATAAAAAAAGAAAAAAGGAGAAACATGATTGCCAGTACTCGCAAGAACTAAGATAGAG  
AGAAAAAG

TAGAAAAGGAACAAATGGTAGGTCTTTAAGATAAGAAAGATAAGATAAGACATCTTTTTTTTTTTTTTTTT  
TTTTTTTTTTTTTTTTCCGATAACAAAGAAGAATCCTTCGGTCTCTTCTTACTGCTGTTACTGCTTATCAAG  
AGTGTCTG

GAAATAGAAAAGGAGTGATGGTTTTCTTTATTTTTAACCCCTGTAAAATTTTTTTATTTTTTTATTTTTACT  
CTTATATATGTATATGTTTGTGTTTATTTCTGAATAAAAATTTATAAGAACCAAATTTAAACCGTTAATAG  
CCCACCCA

TTAATGACTTTGTGTGTTTATTACCCTTTAATTAATTACCAAAAAAAAAATAAACTACGTTTTTAATTTCT  
AATTTATCAAATTTCTTTTTTTTACATATAACTATATATTTATATGTCACCCTATTCAAGTTCGTTAGTT  
TTCTTTCA

GGTATTTTTTTTTTTTTTTATTGATTTTTTTTTTCACTCTTATTTTTTCCCTCATTTATTCATCATACTTTA  
ACGAACTCTATTTCTTTTCAAATCCTTATCTACCTATTTTTTTTTTCTTATTTTTCTTCTCTGTCAGTT  
AGTCAGTA

AAAAAAGCTGAAAGCTTAAAGAAGCAAATTTTTGAGAAGGTTTCAGAAAGAATAAAATAACAGACTATACA  
GTTTAATTATATATATATATATATATACGTGCATTTTTCTTAAAGAAATATAACTTTTTTTCTTGTACTGCC  
TGCAATCT

CGCGATAATGACGCGACACAGCCATTAGTGTGAAATTTGATTTTTCTTGGCCAAACTAGGTATAATATTTGT  
TACAAATTATTGATTTTAAATATATATCTCGGGTTCATTTTTTACGTCGGTACTCAAAGGATCAAACACT  
TACATTTT

GATGGCTGGTTTGTCTTTTTAAGTTCTTAATATTTATTTTTATATTTTATTTTTGATTTTTTTTTTTTTTTTT  
TCCATTAGTGAATGACAGCAATGTATTAAGCTGCTGCCGCGCATACAAAATGTACTGCGTTAAATTAGATT  
AGCTTAAA

CACAGATATATAATATATTCTAAGTAAAAAGAACGGATTATGAAAGAAAACGCGCATAATATATATATGTA  
TGTATTTTCTAATTTATATTAGCAACTAAATTAATTACATCAATACTATTTTTTTTTTTTTACTTTTACAAG  
GTTTATTT

GAAAGCTTAAAGAAGCAAATTTTTGAGAAGGTTTCAGAAAGAATAAAATAACAGACTATACAGTTTAAATTAT  
ATATATATATATATACGTGCATTTTTCTTAAAGAAATATAACTTTTTTTCTTGTACTGCCTGCAATCTCT  
ATTCTTCA

TGCTGATGCATCAAGTTTGTGCATGGAATATGAAATAGAAAAGGAGTGATGGTTTTCTTTATTTTTAACCC  
GTAAAATTTTTTTATTTTTTTTACTCTTATATATGTATATGTTTGTGTTTATTTCTGAATAAAAAT  
TTATAAGA

CGCGAAAAAAAAAAAAAACAGGAAAAACGCGAAATGTCCGTAACCTTTACCCGGTAATAGTCACGTGATAA  
AGGTGCATTGGTCTAGCTGGCTGTTCTGGCCAACGCGACAGCGGGTTTCATACTTTTCACTAGAACAAAAAT  
CGGGGGAA

ATAATTCACCAAAAAACAGCAGAGCACGTCCTATATATATATATATATATATATATATATATATACATATATA  
TATACGAATATATTTATGACAGTCTAAATCGTTGCTCCTGTTCAATTTTAAAGCTCTTTTATAACTGCTGT  
GGCGCCAT

TTGATATATTATTGAGTTGTATTGCTGATTTGACCATATGAGTAAGCAGTATATAACGCGAGGTTCAATGG  
CCTCTTTACCATGAAAAAAAAAAAAAAAAAAAAAAAAAAGGTAAGGAAAAAGAGTATTTTCAATTCGTTTCT  
GAACATAT

TAACTTACTTTAAATAGCAAAATAGGAAAAGCTACGAGAACTGAAAAGTAAAAAAAAAAAAAAAAAAAAATA  
AAAAAAAAAGAAAAAAAAAGGAGAAACATGATTGCCAGTACTCGCAAGAACTAAGATAGAGAGAAAAAGGA  
CGATATAT

ATCCATTGATACGGCCACGCCCGTTAAAACGCTAAGATATATATATATATGTAGCTAAGATATATATATATGT  
ATATATTCGGTATTTAGTAGATATTTCTTAAGGCGATATTCGCCCGAGAGCTATTTACAGTTTTTTTTTT  
GCAGTCGT

TTAGCGGTTTTTTTTTTGGTTTTCTTAAGATTGGTTTTATGATTTTTTTTTTTTTCTTTTTCAAATTTTTTTA  
TTATTTTTTTCAATTTTTCTTTTTAAAAGGCTTGTGGTTGACTAGTCCTTTCTTTTTAGGGGTTGCTTTCTA  
TGAGAACG

TATTACGGTTTTTGATATATTATTGAGTTGTATTGCTGATTTGACCATATGAGTAAGCAGTATATAACGCGA  
GGTTCAATGGCCTCTTTACCATGAAAAAAAAAAAAAAAAAAAAAAAAAAGGTAAGGAAAAAGAGTATTTTCA  
ATTCGTTT

TTAAAATTTTCATTTAGTGGGATGTAAAAAAAAATTTAGTTCGCGCGTACAGTTTTTTCAACATTTGCCAT  
ATGATGTAGAATGGCGCTATCAAATCATCACTCTTATTACAGGTGAATCGCGCGCTAACACTTCAATTACA  
GACACATA

AGATAAAGGGGGCTTTGACGTATAAGTGTCCGGTATTTTTTTTTTTTTTTTATTGATTTTTTTTTTTCACTCTTAT  
TTTTTCCCTCATTTATTCATCATACTTTAAACGAACCTATTTCTTTTTCAAATCCTTATCTACCTATTTT  
TTTTTCTT

GCAGGAAATGAAAGATGAACCACCCATTACATTCGATTTTTTTTTTTAATTATATTTTTTGACTATTATTTAA  
TCATTA AAAACACATATATTTTATAAATTCGTAAGGTCGTTAGTTCTATCGTAAAAGTGAAAAAGTTTTGA  
GCCAGTTT

CGTATCATTGAAAACGAAAAAGAAATGTGGATTTTCTTTTTCAATTTTTTTTTTTTTTTCATGATTTTTTTG  
GGCGACGCAGAGATGAGATAAAAAAATTTTTCAACTGCTATTCTCAATCGAATTTTTTTTTGTTATCTCAC  
CTATTTGT

GAGGTTAGAATGAAAATAAAATTCGCCAGTAAATGCGTATCTTGGAGAAAATATCAATTTGTTATTTTGT  
TATATAAAAAATTA AAAAAAAAAAAAAAAAAAAAAAATACTCAAATACTCAAATACGTATACATTATACTGAAATA  
CTTCGCTT

CTGTATTTAGTACACAATAACGCCGACGAAAAATCTAATTAAGAAGGACACTATAAATAACAAACAATCGC  
GCGGAACGTCAAGCGTATATACTATATAAAAAAGAAAACAAAAAATCAATAACCCATTAAAGATACATAA  
TCAATAAA

TTTTTATTTCTTTTTTTTTTTTTTTTTTTTTTTTTTTTACGCCGATGCTCATCGCAGAAAATTTTTCTTCAG  
TTTATTTGTCTTATAAAAAGACTGTCTACGCTCAAATAACTTATACTTTTCTGTATCTCATTCAAATTAT  
TTTCTTGT

TCTTGTACTGCCTGCAATCTCTATTCTTCATTCATCACACATCTATTCAAACGCGTTAAAATTTTTTTGTT  
AGCCTATAAGTAAAACGCGTGCAGTGTATCCAATTTTACTGAATTAATTTCTTTACTCATTGGATGATATA  
TATCTTCT

GCAATCAATGATAAGTACAAGTCCAATCGGACTGATTCGTAAAAATTTTTGCAGACATTTTTGATATATA  
TTCAATTCATATTTTATCTCTTTTTTTTTTTTTTTTTTTTTTTCAGACGTGGAATGGTGGGAAAGCCAAAATGTCA  
CTGACCGC

AACACCGCACCGCGAAAAA AAAAAAAAAA CAGGAAAAACGCGAAATGTCCGTAAC TTTACCCGGTAATAGT  
CACGTGATAAAGGTGCATTGGTCTAGCTGGCTGTTCTGGCCAACGCGACAGCAGGGTTCATACTTTTCAGTA  
GAACAAAA

AACTGAAAAGTAAAAAAAAAAAAAAAAAATAAAAAAAAAAAGAAAAAAAAAGGAGAAACATGATTGCCAGTA  
CTCGCAAGAACTAAGATAGAGAGAAAAAGGACGATATATCAAGAAATAAAGGGAAGGTAATTCAGTAAG  
CACTGCTT

ACCCAAAAAAAAAAAAAAAAAGACATCAAATCTCTTTTTTTTTTTTTTTTTGTTAGTTCTGTTGCCGTATGCTATCTA  
CTCCTAAGGCTTTTTTCTACTACGGCAATCTATTACAATGTGCAATTAGGCTAAATGCTAAAAAAGAAA  
AAAAATC

AATGATGGGTCAAGGATCGTGCTTTTGTTCGTTGGTGGATCGGCCGTACGTGTTTAGTGAGGGTACTATTT  
AACTTACTTTAAATAGCAAAATAGGAAAAGCTACGAGAACTGAAAAGTAAAAAAAAAAAAAAAAAATAA  
AAAAAAA

TATCTTGCAGATCCATTGATACGGCCACGCCGTTAAAACGCTAAGATATATATATATATGTAGCTAAGATAT  
ATATATATGTATATATTCGGTATTTAGTAGATATTTCTTAAGGCGATATTCGCCCGAGAGCTATTTCA  
GTTTTTTT

TGCATTTTTCTTAAAGAAATATAACTTTTTTCTTGTACTGCCTGCAATCTCTATTCTTCATTCATCACACA  
TCTATTCAAACGCGTTAAAATTTTTTGTAGCCTATAAGTAAAACGCGTCGCGTGTATCCAATTTTACTG  
AATTAAT

TGTAAGTCTAATATGGTATTCTTAAAAAAAAAAAAAAAAAAAAAAAAAGCGTCTTAGAGGGAATATAAGAGAAA  
GAAGAGATAGCATAACACATGATTTATTTTTATTTTTGCGTTTTTTTTTTTTCTTAATTGTTTATCAATGT  
ATCTGTGA

AATCAATCTTAACGCATATGCCCTTGTGAGAGCCGTCCTTGAATAAGCATATTTGGAATGGGCATCGATT  
TAAAATTTTCATTTAGTGGGATGTAAAAAAAAATTTAGTTCGCGCGTACAGTTTTTCAACATTTGCCATA  
TGATGTAG

AGAAGGCCGATGAGGCCTTATGTAAGTCTAATATGGTATTCTTAAAAAAAAAAAAAAAAAAAAAAAAAGCGTCTT  
AGAGGGAATATAAGAGAAAAGAAGAGATAGCATAACACATGATTTATTTTTATTTTTGCGTTTTTTTTTTT  
TCTTAATT

CGAAATGTAACATAATCATGACATTTTTTAAAAGTTTTCAATGAAAAATGAAAGAGTAATGAACAAACATA  
TTTTTTTTATAAAATGCATAAAAACATATAGATATATATATATTTTACGTGGAAAAATGTTAAAACATTTGA  
TAAGAAA

CTTTTTTACGTTAAAATAGTGAAAAAGGAAAGGAGGAAAGAAAAACTAATATAATTAATTGTATTATAT  
ATGTACTTTTCATTTTGAATGTGAAAAATTCAGGCGGAAAAATGAAAAATCAACACTGCGCTTG  
TGAGAAA

ACGCGTCCCTTTGGAGAAGATCGATCCTTCTTTGGGTCTTTCAATTTGATTGGAAAAAAATATTTAAAA  
AATAGAAGAAAAATATAGAATATATAGAATATATAGAATCAACTACTGCAGTAGATAAATAAAGAAGACTA  
TTCATATT

ATTAGTGTTAATAGCGGTGACAGTAGTTTTATTGTATCTCACCTTTTTTTATGTATAATCATATAATGACT  
TAATTATTTTTGAAATGTTTCTTTTTTTTTTTTTTAGTTATAACCCTTTTTTACGGATTCTTACGTACTTATT  
TAATCTTT

TTATTGAAAATCCTTTGGAAATGCTATTGTGAGGTTAGAATGAAAATAAAATTCGCCAGTAAATGCGTATC  
TTGGAGAAAATATCAATTTGTTATTTTGTATATATAAAAAATTAATAAAAAAAAAAAAAAAAAAATACTCAAAT  
ACTCAAAT

TTAATTTGAAGTCGAGTACATCTCTTTTCAGTGAGTAACCTTATATATTTTTTGAAGTTAACATCCTTATTCTT  
TTTTTATATTTTTATTTTTTTTTATGTTTATTTTCTATTACTGATTTTCACAAAGAAAGGTAAAAAAAACA  
TACTTCAG

TATAAGTGTGCGTATTTTTTTTTTTTTTTTATTGATTTTTTTTTTCACTCTTATTTTTTCCCTCATTATTCAT  
CATAATTTAACGAACTCTATTTCTTTCAAATCCTTATCTACCTATTTTTTTTTTCTTTATTTTCTTTCC  
TCTGTGAG

ATGCAGACATTCTTCCGCTTTAAAAGTTGAAAATTCCTCAATGAAAAGGGTGTTCCTTGGCTTTACAAGCGC  
ATTAACATTTAATATTATATAATATTTATAATATACATGTTATTCCAATAGTAAAAAAAAAAAAAAAAAATG  
AAAATGAA

TTTTTTTTTTTTTTTTTTTTTTTTTTTATTATTTACAAGCGTCTATATATTTTCTATTATAGAATATTGTCATTTA  
TTACATTGGTTCATCTGTAAATCTCATCAAACGGTCTCGTATCGGCGAAGCAACTGTCCCAAACCTCATCT  
ACAATTTT

TTTTTTTTTTTTTTTTTTTTCAGTTTTTAAAATTAGTCCTGATCAAAAAGCCATCACGTGGATCCCCGAAAAAAAA  
CGGATCCGGGTAACCAGAAGTATTTTTTTTCAAGGGAATAAAAAGTTACCCTACCAAATAAAAAAATTCAG  
TAGGGTAA

CTTGGAGAAAATATCAATTTGTTATTTTGTATATATAAAAAATTAATAAAAAAAAAAAAAAAAAAATACTCAA  
TACTCAAATACGTATACATTATACTGAAATACTTCGCTTGTCTTTCGAATCTAAATCCTCTCTCTCTTCTGT  
CTCAAAT

CGTATATATGTATATACCATCTTTTTTTACGTTAAAATAGTGAAAAAGGAAAGGAGGAAAGAAAAACTAA  
TATAATTAATTGTATTATATATGTACTTTTCATTTTGAATGTGAAAAATTCAGGCGGAAAAAATTGAA  
AAAATCAA

ACTATCCATCCGTGTATTATTTCAAAGAGCGAAAAGAAGGCGCGTTCGCGTTCGACGCGCCTTTTTAGGCTAG  
AAAATAAACAGAAAACAAAAACAAAAAAGGCGAAAAACAAACGAAAAACAAACGACAGTAGA  
TAGAGGAG

TTTCTCTCCCCGATTGTAAATTTATTTCTCGTCTACTATAATAATTCACCAAAAAACAGCAGAGCACGTCC  
TATATATATATATATATATATATATATATATATACATATATATATACGAATATATTTATGACAGTCTAAATCG  
TTGCTCCT

GCGGCTGCTCGTATAAAATGACGCGGTTCGCGCGCCGTTTGACGTCCTATAGGAGAATGCCAAAAAGGGTGT  
TTTGCTGGAAAATATACATATATAAATATATAAAGAATAGTGAAACAATAGAAATATTAGTAATACAGC  
CATAGCAG

CGCATAACGAGCAAATCAATGATAAGTACAAGTCCAATCGGACTGATTTCGTAAAAATTTTTGCAGACATTT  
TTGATATATATTCAATTCATATTTTATCTCTTTTTTTTTTTTTTTTTTTTTTTCAGACGTGGAATGGTGGGAAAGC  
CAAATGT

TTTTTTTTTTTTTTTTTTTTTTTTTTTACGCCGATGCTCATCGCAGAAAATTTTTCTTCAGTTTATTTGTC  
TTATAAAAAGACTGTCTACGCTCAAATAACTTATACTTTTCTGTATCTCATTCAAATATTTTCTTGTCA  
ACAACCTG

CAAAAGGTTGTACCCCTTCCACAGATATATAATATATTCTAAGTAAAAAGAACGGATTATGAAAGAAAAC  
GCGCATAATATATATATATGTATGTTTTCTAATTTATATTAGCAACTAAATTAATTACATCAATACTATT  
TTTTTTTT

TAAATGGCATTCAATCCCTTCCGCGCCAGTATATTAGTTACTAATCATAACAGTTTCTTGTTCATTTTTT  
AGATTTTAATTAGCGGTTTTTTTTTTGGTTTTTCTTAAGATTGGTTTTATGATTTTTTTTTTTTTCTTTTTCAA  
ATTTTTTT

TTGTCTTTTTAAGTTCTTAATATTTATTTTTATTTTTGATTTTTTTTTTTTTTTTTTTTTTCCATTAGTG  
AATGACAGCAATGTATTAAGCTGCTGCCGCGCATACAAAATGTACTGCGTTAAATTAGATTAGCTTAAATT  
AGTGCTTG

AACAACAAGTAGCTCTTCTCTTGTGTTTTGTCCTTTTTGCAGTTTGCTTTTTATCCCTGTGATGAAAAAAAAA  
AACTAAAATTTTTTGGCGGCGCATCGAAAAATCTGTTACCCGACCCGTTATTGGTGATAATACCCATTTT  
TAACGCGA

AGGAGTGATGGTTTTCTTTATTTTTAAACCCTGTAAAATTTTTTTATTTTTTTATTTTTACTCTTATATATG  
TATATGTTTTGTGTTTTATTTCTGAATAAAAATTTATAAGAACCAAATTTAAAACCGTTAATAGCCACCCAAA  
ATTGAAGT

AGGAAGTCAATAAGCATGGTCTATTCTTTCTTTTATGTAGTTTATAATAGGCAACTTTAATGTTCCAGA  
AGACGCGTTTTCCATTACTTATTATACCCAAAAAAAAAATTTAAAAAAAAACAACCTTCGAACATGCAAACG  
CAAAGCGA

TAAAAAAAAAAAAAAAAAATAAAAAAAAAAGAAAAAAAAAGGAGAAACATGATTGCCAGTACTCGCAAGAA  
CTAAGATAGAGAGAAAAGGACGATATATCAAGAAATAAAAGGGAAGGTAATTCAGTAAGCACTGCTTAG  
CTGTCTGC

TATTTTATCTCTTTTTTTTTTTTTTTTTTTTTCAGACGTGGAATGGTGGGAAAGCCAAAATGTCAGTACCGCG  
GCTAAAAGTTAAAAAATACATGAGACGACATTCTTTTATGTATATATATTTACACATGTATACAAACAAAT  
ACACACGC

CCCTGTGATGAAAAAAAAAAAAACTAAAATTTTTTGC CGCGCATCGAAAAATCTGTTACCCGACCCGTT  
ATTGGTGATAATACCCATTTTTAACGCGATCACATATCATAAACTGCAGTGAGAGGGTCTGTTTACAGTAGT  
TATAGTAC

TCTTTTTCTTATTTCTACGCTATACAAAAAGTGTGCTTTTTTTCTTCTATTTTTTTTTTTCTTTAATGACTTT  
GTGTGTTTTATTACCCTTTAATTAATTACCAAAAAAAAAATAAACTACGTTTTTAATTTCTAATTTATCAA  
ATTTCTTT

GAAAATTCAGATCGCTTTATACGAGTAAGTATGCCAAATACACCAAATATACCAAAGCATTGATTGCGTAT  
ACTGAGAATACATATATATATATATATATATATATATATATATATATATATATATATATATATATATATAT  
AGTGGGAA

ATTCGATTTTTTTTTTAATTATATTTTTGACTATTATTTAATCATTAAAAACACATATATTTTATAAATTC  
GTAAGGTCGTTAGTTCTATCGTAAAAGTAAAAAGTTTTGAGCCAGTTTTCAAAAACCCGCGAGGATCCCAC  
TATGTATG

ACATTGACTCACTATCCATCCGTGTATTATTTCAAAGAGCGAAAAGAAGGCGCGTTCGCGTTCGACGCGCCTT  
TTTAGGCTAGAAAATAAACAGAAAACAAAAACAAAAACAAAAAAGGCGAAAAACAAACGAAAAACAAA  
CGACAGTA

AGTTTAATTTTTGGGTGGTAATGGCTGTGTGACTAGCTATAGAAAAGAAAAAATTTAAAAAAAAAAAAAAAA  
TCAAGTAGTTCTGCACTGCGACGTCCATTATAGCATTATGAATTGGTCCCTGATTTACGCATGCGATAAA  
CTATTTTT

AAAAAAAAAAAAAAGCGTCTTAGAGGGAATATAAGAGAAAAGAGATAGCATAACACATGATTTATTTTT  
TATTTTTGCGTTTTTTTTTTTTTTCTTAATTGTTTATCAATGTATCTGTGAGAGTATCTACATAAAAAAATA  
ACCATATG

TCTTTTTTTAGAAATCGCGTGGCTTGGTAACGCGATAATGACGCGACACAGCCATTAGTGTGAAATTTGAT  
TTTCTTGCCAAACTAGGTATAATATTTGTTACAAATTATTGATTTTAATATATATATCTCGGGTTCATTTTT  
TACGTCGG

TTAAAGAAATATAACTTTTTTCTTGTACTGCCTGCAATCTCTATTCTTCATTCATCACACATCTATTCAA  
CGCGTTAAAATTTTTTTGTTAGCCTATAAGTAAAACGCGTTCGCGTGTATCCAATTTTACTGAATTAATTC  
TTTACTCA

AAGATTATAAGGACTGCCAATAAAAAAGACTATTTGTGAATTTTTTTATAGATTTGTAAAGGTTAAAATA  
GAAGGCCGATGAGGCCTTATGTAAGTCTAATATGGTATTCTTAAAAAAAAAAAAAAAAAAAAAAGCGTCTTA  
GAGGGAAT



TTTTTTTTTTTTCTTTTTTTTTTTTTTTTTCTTTTTCTTTTTTTTTTTTTTTGAGCCTTTTCGAATCTAGA  
CTCTATGTGAGTCTATTCTCGATGGGGAGTATCGGAAATTGAATTTTAATTCGAATGACTTCTAATGCATC  
ACTACAGA

GGCTTTGACGTATAAGTGTGCGGTATTTTTTTTTTTTTTTATTGATTTTTTTTTTTCACTCTTATTTTTCCCTC  
ATTTATTCATCATAACATTTAACGAACTCTATTTCTTTTCAAATCCTTATCTACCTATTTTTTTTTCTTTA  
TTTTCTTT

TGCAGACATTTTTGATATATATTCAATTCATATTTTATCTCTTTTTTTTTTTTTTTTTTTTTCAGACGTGGAAT  
GGTGGGAAAGCCAAAATGTCACCTGACCGCGGCTAAAAGTTAAAAAATACATGAGACGACATTCTTTTATGT  
ATATATAT

TTAATGTGCGAAACAGTCCGTAAACAAACACATTCCCACAAAACACCGCACCGCGAAAAAACAACAG  
GAAAAACGCGAAATGTCGGTAACTTTACCCGGTAATAGTCACGTGATAAAGGTGCATTGGTCTAGCTGGC  
TGTTCTGG

GGACCAAGTGTGATGTGACGTTGTACTTGACATTCTAAGGCATCCTGCAACTGTTCTGTGGAGCTATTAA  
ATCTTTATAGTAAATTTTTTTTTTACTTTTTTTTTTTTTTTTTTTTTTTTTTTTATTATTTACAAGCGTCTATA  
TATTTTCT

GATGTAAAAAATTTTTAGTTTCGCGCGTACAGTTTTTCAACATTTGCCATATGATGTAGAATGGCGCTAT  
CAAATCATCACTCTTATTACAGGTGAATCGCGCGCTAACACTTCAATTACAGACACATACTCCTGAATGGG  
TGCTTTCA

AAATAGGAAAAGCTACGAGAACTGAAAAGTAAAAAATAAAAAATAAAAAAGAAAAAAG  
GAGAAACATGATTGCCAGTACTCGCAAGAACTAAGATAGAGAGAAAAAGGACGATATATCAAGAAATAAAA  
GGGAAGGT

ATAGCGGTGACAGTAGTTTTATTGTATCTCACCTTTTTTTATGTATAATCATATAATGACTTAATTATTTT  
TGAAATGTTTCTTTTTTTTTTTTTTAGTTATAACCCTTTTTTACGGATTCTTACGTACTTATTTAATCTTTCT  
AGTAGACA

CCTAAAAACCACCCAAAAAAGACATCAAATCTCTTTTTTTTTTTTTTTGTAGTTCTGTTGCCGT  
ATGCTATCTACTCCTAAGGCTTTTTTCTACTACGGCAATCTATTACAATGTGCAATTAGGCTAAATGCTA  
AAAAAGA

GTTTCAGAAAGAATAAAATAACAGACTATACAGTTTAATTATATATATATATATATATACGTGCATTTTTCT  
TAAAGAAATATAACTTTTTTCTTGTACTGCCTGCAATCTCTATTCTTCATTCATCACACATCTATTCAAAC  
GCGTTAAA

GTATAAATGACGCGGTGCGCGCCGTTTGTGACGTCCTATAGGAGAATGCCAAAAGGGTGTGTTTGTGGAA  
AATATACATATATAAATATATATAAAGAATAGTGAAACAATAGAAATATTAGTAATACAGCCATAGCAGTA  
GTAGTGAT

GTCATCGAACCTTTTTTAAGAGATAAAGGGGGCTTTGACGTATAAGTGTGCGGTATTTTTTTTTTTTTTTATT  
GATTTTTTTTTTCACTCTTATTTTTTCCCTCATTTATTTCATCATAACATTTAACGAACTCTATTTCTTTTCAA  
AATCCTTA

TCCTTTGGAAATGCTATTGTGAGGTTAGAATGAAAATAAAATTCGCCAGTAAATGCGTATCTTGGAGAAAA  
TATCAATTTGTTATTTTGTATATATAAAAAATTAATAAATAAATAAATAAATAAATAAATAAATAAATAAATAA  
GTATACAT

TCTATGTATAATATAACCAGATAAAAAATACACCTTCGTACAAGGTGCTAATAATGTTGAGAATTCGAAATT  
CCTTTTTAAAGGCGTATTCCGTATTGAATGATTGAAAATTTATTTCTTTTTTTATTTCTTTTTTTTTTTTT  
TTTTTTTT

CGACGACGCAGCGGCTGCTCGTATAAAATGACGCGGTGCGCGCCGTTTGACGTCCTATAGGAGAATGCCA  
AAAAGGTGTTTTGCTGGAAAATATACATATATAAATATATATAAAGAATAGTGAAACAATAGAAATATTA  
GTAATACA

ACACTTTTTTACTCGGAAATTTTCTCTCCCCGATTGTAAATTTATTTCTCGTCTACTATAATAATTCACCA  
AAAAACAGCAGAGCACGTCCTATATATATATATATATATATATATATATATACATATATATACGAATAT  
ATTTATGA

TCTGATACGCCTTTCCCTCCGCAGGAAATGAAAGATGAACCACCCATTACATTCGATTTTTTTTTTTAATTA  
TATTTTTGACTATTATTTAATCATTAAAAACACATATATTTTCATAAATTCGTAAGGTCGTTAGTTCTATCG  
TAAAAGTG

ATTTTTTTTTATAAAATGCATAAAAAACATATAGATATATATATATATTTACGTGGAAAAATGTTAAAACTATTG  
ATAAGAAAAACGCTCAAAACAAGTAGTAAGCAGGCTTTTTTTTTTTTTTGTCTGCTTGTTTTAGAGAACCTG  
TATATCAA

TTTATTTCTTTTTTATTTCTTTTTTTTTTTTTTTTTTTTTTTTTTTTTTACGCCGATGCTCATCGCAGAAAATT  
TTTCCTTCAGTTTATTTGTCTTATAAAAAGACTGTCCTACGCTCAAATAACTTATACTTTTCTGTATCTCA  
TTCAAATT

ATAAAAAAGACTATTTGTGAATTTTTTTTATAGATTTGTAAAGGTTAAAATAGAAGCCGATGAGGCCTTAT  
GTAAGTCTAATATGGTATTCTTAAAAAAAAAAAAAAAAAAAAAAAAAAGCGTCTTAGAGGGAATATAAGAGAAAAG  
AAGAGATA

GAGGGCTATATCATTACCGAACTTAAGTTTTCTATTGGAATATTATACTTTATAAACTAAATAATTACCCA  
TCTATGTTGTTTCCCAAGAATGTTTGCTGCCATATAATAAGAACAAAAAAAAAATAACAAAAAAAAAAGA  
AAAAAAA

TACATAAAACAGTTTAATTTTTGGGTGGTAATGGCTGTGTGACTAGCTATAGAAAGAAAAAATTAAAAAA  
AAAAAAAAAATCAAGTAGTTCCTGCACTGCGACGTCCATTATAGCATTATGAATTGGTCCCTGATTTACGC  
ATGCGATA

CTTTTTTAAGAGATAAAGGGGGCTTTGACGTATAAGTGTGCGGTATTTTTTTTTTTTTTTTATTGATTTTTTTT  
TCACTCTTATTTTTTCCCTCATTATTCATCATACATTTAACGAACTCTATTTCTTTTCAAATCCTTATC  
TACCTATT

TTTTTTTTTTTTGCACACCTTTAAACCTATAGAACTCCTTCATATAAAATGTACTAGTTATAAGATGACT  
TTTTATATTCAAATTAGAAGAAAACCTAACTAAAATTAATAAATAGCGGCTATTTAAAGGTATTAATAA  
GTGAGAAA

ATTTTTTTCATGTTTTTCTTTTCTGATACGCCTTTCCCTCCGCAGGAAATGAAAGATGAACCACCCATTACA  
TTCGATTTTTTTTTTAATTATATTTTTGACTATTATTTAATCATTAAAAACACATATATTTTCATAAATTCG  
TAAGGTCG

TCATCTCATTAAATGGCATTCCCTTCCGCGCCAGTATATTAGTTACTAATCATAACAGTTTCTTGT  
TCAATTTTTTAGATTTAATTAGCGGTTTTTTTTTGGTTTTTCTTAAGATTGGTTTTATGATTTTTTTTTT  
TCTTTTTT

CTTTAATTAGTTTAGGTATACTTTCCCTGCGAAGGTCTTGTGGAATATGTAGTAATCTCTACCCGCGTTTT  
TAGTTAATGCTGAATGGTTTTTGTGCTCCTTTTTTCTTAGAGTGACAGGCGCGGCAGCCCTTAACGCG  
GGTACCTG

GTGCCGCGCCATCATGGTCCGGTAACGGTCGTAGTGAATGACTCATATTTTTCCATCTCTTTTCGGCCTT  
GCCAAAAATGAAAAAAAAAAAAAAAAAAAAAAAAAATTAAAAACGATGTCCAGAATCACAACACTACAAC  
ATAGTTTT

CAGAACCGTCTTCCTTGTGCTGTTTATGATGTCTTTTGTCTCCTATTGTTTTCGAATTTTATTTTTTTTTTT  
TTTTTATTTTTTTTTATTTTTTTTTTTGTTTTATATAATTCCTCGCGCTGCCTTAATGATAATTCTTGATTACT  
AATTGTTT

CTGTTCTCGCGCGTTTTTTTTTTTTTTTTGCTTTTTTTGGTTCCTTTTCGCGGATATCGTATTATCGATATT  
ACAACAAAATGTTTGGAGATCTCCTTCGCTGTCTTTAAGTAAAAGGCTTTAACCGCTTATTTTTCTCTCT  
TTTTTTCC

TTCTTGTGCTGTTTATGATGTCTTTTGTCTCCTATTGTTTTCGAATTTTATTTTTTTTTTTTTTTTTATTTT  
TTTATTTTTTTTTTTGTTTTATATAATTCCTCGCGCTGCCTTAATGATAATTCTTGATTACTAATTGTTTCA  
TGACTTCT

GTCTTTTGTCTCCTATTGTTTTCGAATTTTATTTTTTTTTTTTTTTTTATTTTTTTATTTTTTTTTTTGTTTTAT  
ATAATTCCTCGCGCTGCCTTAATGATAATTCTTGATTACTAATTGTTTCATGACTTCTGGTGCTAAAGGG  
AAGGGGA

GTCTATTTTGGTGCCGCGGCCATCATGGTCCGGTAACGGTCGTAGTGAATGACTCATATTTTTCCATCTC  
TTTCGGCCTTGCCAAAAATGAAAAAAAAAAAAAAAAAAAAAAAAAAAAAAAAATTAACGATGTCCAGAATCA  
CAACTACA

AGCAACGAAACAGAACCGTCTTCCTTGTGCTGTTTATGATGTCTTTTGTCTCCTATTGTTTTCGAATTTTA  
TTTTTTTTTTTTTTTTATTTTTTTATTTTTTTTTGTTTTATATAATTCCTCGCGCTGCCTTAATGATAATTC  
TTGATTTA

TGTTTATGATGTCTTTTGTCTCCTATTGTTTTCGAATTTTATTTTTTTTTTTTTTTTTATTTTTTTATTTTTT  
TTTGTTTTATATAATTCCTCGCGCTGCCTTAATGATAATTCTTGATTACTAATTGTTTCATGACTTCTGG  
TGCTAAAG

GTGAGATGCCCAAGTGAGAATTTTTTTTTAAATAATGATGTACTTTAATACAATATATATATATATATATAT  
ATATATATATATATATATAAGGAATGATAACTCTATTTAAGTAGATTATGACATTGTAGTAGAAGAGGG  
CGTGCTAC

TCTTTTGCTTGAGCACAGAGGTGAGATGCCCAAGTGAGAATTTTTTTTTAAATAATGATGTACTTTAATACA  
ATATATATATATATATATATATATATATATATAAGGAATGATAACTCTATTTAAGTAGATTAT  
GACATTGT

CCGAAAGTTAAAGGGCAAAAAGCTCACATGACACGCTTGTTTTGGAAAACGTCATAGAAAACCACGTG  
AAAAAAAAAAAAAAAAAAAAAAAAAAGAAAAGAAAAGGGCAGCTGCCAACTAGTACACACTACACAG  
ATATTTAT

TACTTCATTCGTCTATTTTGGTGCCGCGGCCATCATGGTCCGGTAACGGTCGTAGTGAATGACTCATATT  
TTTCCATCTCTTTTCGGCCTTGCCAAAAATGAAAAAAAAAAAAAAAAAAAAAAAAAAAAAAAAATTAACGATG  
TCCAGAAT

AAAGGGCAAAAAGCTCACATGACACGCTTGTTTTGGAAAACGTCATAGAAAACCACGTGAAAAAAAAA  
AAAAAAAAAAAAAAAAAAGAAAAGAAAAGGGCAGCTGCCAACTAGTACACACTACACAGATATTTATGA  
AAAACACT

TTTTTTCTTTATTCTTTTTTCTCCTCTTTATGAATACAGATATTCAATTTTTTTGAATATCTGATTGTTTT  
TATTTTCATTTCAATTTTTTTTTTTTTTTCAATTTTTTTTATCCGATCGTTGCGCCAAGCTTCTATCGCTTA  
AAACAATG

TCCTATTGTTTTCGAATTTTATTTTTTTTTTTTTTTTTATTTTTTTATTTTTTTTTGTTTTATATAATTCCTC  
GCGCTGCCTTAATGATAATTCTTGATTACTAATTGTTTCATGACTTCTGGTGCTAAAGGGAAGGGGGAAA  
AGGGAAGC

GCTTGTATATACTTCATTCGTCTATTTTTGGTGCCGCGGCCATCATGGTCCGGTAACGGTCGTAGTGAAT  
GACTCATATTTTTCCATCTCTTTTCGGCCTTGCCAAAAAATGAAAAAAAAAAAAAAAAAAAAAAAAAATT  
AAAAACGA

CAAGTGAGAATTTTTTTAAATAATGATGTACTTTAATACAATATATATATATATATATATATATATATATATAT  
ATATATATATAAGGAATGATAACTCTATTTAAGTAGATTATGACATTGTAGTAGAAGAGGGCGTGCTACTT  
GCGCTCTG

GACTCTCCAACCAGAAAGTTAAAGGGCAAAAAAGCTCACATGACACGCTTGTTTTGGAAAACGTCATAGAA  
AAACCACGTGAAAAAAAAAAAAAAAAAAAAAAAAAAGAAAAAGAAAAGGGCAGCTGCCAACTAGTACA  
CACTACAC

TACGGGACAGCAGAGATAGGCTGTTCTCGCGCGTTTTTTTTTTTTTTTTGCTTTTTTTGGTTCCTTTTCGCG  
GATATCGTATTATCGATATTACAACAAAAATGTTTGGAGATCTCCTTCGCTGTCTTTAAGTAAAAGGCTTT  
AACCGCTT

TATTAGACATAGCAACGAAACAGAACCGTCTTTCCTTGTGCTGTTTATGATGTCTTTTGTCTCCTATTGTTT  
TCGAATTTTATTTTTTTTTTTTTTTTTTTTTTTTTTTTTTTTTTTTTTTTTGTTTTATATAATTCCTCGCGCTGCCTTA  
ATGATAAT

TTCTTTATAACTATCGTGTTTATTTTCTTAGTGGTGGTCTTTTTATTATTACCCGTTTTCTTCGGTAATAT  
TTTATAGTGAAAAATTTTGGTAAAAAAAAAAAAAAAAAGAAAAATTTTTTTTTTTTCAAATCTCATCTCATC  
TCTTAAAA

TCCCTGTGCATACGGGACAGCAGAGATAGGCTGTTCTCGCGCGTTTTTTTTTTTTTTTTGCTTTTTTTGGT  
TCCTTTTCGCGGATATCGTATTATCGATATTACAACAAAAATGTTTGGAGATCTCCTTCGCTGTCTTTAAGT  
AAAAGGCT

AAAAAAAAAAAAAAGGTGAAAGGAAGCGAGCATTAAATTTTTTATTTAATATGTAAGTGTGATATGTATT  
AACAAAGTATCTTTCATAATTTTTGACGAATATTTTTACTTCTTTTTTTACTATTGAAGGTTGGGCTGTGAT  
TCATCGCG

GAGCACAGAGGTGAGATGCCCAAGTGAGAATTTTTTTTTAAATAATGATGTACTTTAATACAATATATATAT  
ATATATATATATATATATATATATATAAGGAATGATAACTCTATTTAAGTAGATTATGACATTGTAG  
TAGAAGAG

CGGTCTTTTGGACTCTCCAACCAGAAAGTTAAAGGGCAAAAAAGCTCACATGACACGCTTGTTTTGGAAAA  
CGTCATAGAAAAACCACGTGAAAAAAAAAAAAAAAAAAAAAAAAAAGAAAAAGAAAAGGGCAGCTGCC  
AACTAGTA

GAGGCGAAATCGATCAATTAGTTGAACAATTAACCTAAAATCTAATATATATAAATATATATATATATATA  
TATAGGAAATATACGGCACGTTATACTAGAGATATTAACATCCCAACTCGGTTAATGGGTACAATAAAAA  
AAAGAGGG

CCGCGCGGGAATTCACATTGCAGTATGGACGGACATCCGGCCATCGCGCGGGCCCGGTATTTGATCTCC  
GTTTTAGAAGCACAGAAAAAATAATATGATGTTATGATGTTTAAATAGATGGATTCATATCGTCCGGGTAA  
AAACGCTT

TATTTTCTTAGTGGTGGTCTTTTTATTATTACCCGTTTTCTTCGGTAATATTTTATAGTGAAAAATTTTGG  
TAAAAAAAAAAAAAAAAAGAAAAATTTTTTTTTTTTCAAATCTCATCTCATCTCTTAAAAAGGTTTATTCTG  
TTTACTCA

CAGAGATAGGCTGTTCTCGCGCGTTTTTTTTTTTTTTTTGCTTTTTTTGGTTCCTTTTCGCGGATATCGTAT  
TATCGATATTACAACAAAAATGTTTGGAGATCTCCTTCGCTGTCTTTAAGTAAAAGGCTTTAACCGCTTAT  
TTTTCTCT



GTTTTGGAAAACGTCATAGAAAAACCACGTGAAAAAAAAAAAAAAAAAAAAAAAAAAAAAAAAAGAAAAAGAAAA  
GGGCAGCTGCCAACTAGTACACACTACACAGATATTTATGAAAAACACTAACTTCTCCTTTTGGAAGTGT  
GACGTACC

TGAACCTCAACAGCTACACATTCTTTTATAATCCTTAATATTCTATATATACATATATGAAAAATAGAAA  
ACGCGAAAACCTGTGCATTTTTTTTTTTAGGCGTTTTTATAATATACTGAAAATAAAAAGAGGCTCTTTAAAT  
GTTGACAC

TTTTTCACCTTTTTTGGAGTTTTTATTTATCTTGTATTCTTTTTTTCTATTATTTTAAAGGTTCAATTTCTAT  
CGACGGTTTTTTTTAATTATATATATATATATATATATATATGTATATAATGAATGTGTAATATTCCAAGTA  
TACGTACC

AAATATATATTTTTCGGAAGTCATATACATTAAATAAATTAACATTATTTTTAAAAATTAATAATAATA  
TTTTAGCAAATAGTTTTTACTTTTTTTTTAAATGCAAATAAGTTCACGTGATATTATTAATAATATTTTAC  
CCAAAAAT

TCTGCATGGCGCTTGTTATATACTTCATTCGTCTATTTTTGGTGCCGCGCCATCATGGTCCGGTAACGGT  
CGTAGTGAATGACTCATATTTTTCCATCTCTTTCGGCCTTGCCAAAAAATGAAAAAAAAAAAAAAAAAAAA  
AAAAAAAA

AAAAAAGATCGGGGTGTAATAATTCTATGCCAAGAAAAAATTAAAAAAATAAATAAATAAATAAATAA  
TTGCGCTCTTCACTCTTAAAAGACAAAAAGTATTAGGATGATAAAAAAATTCATAAAAAAATAAATTC  
TATGGCCT

CAATAGTGTCTCCTTCATGTACTGAGATACTGCTGCAAGCGAAATATCACGAATAATAATAAAAAAAAA  
AAAAAAAAAAAAAAAAAGATGTTTAAATGTTAACAACCTAACAGCAATAAAAAATAAATAAAGGTAGAAG  
ATTGCAAG

ATATAATAATTTTTGTTATCAAATATATATTTTTCGGAAGTCATATACATTAAATAAATTAACATTATTT  
TAAAAATTAATAATAATAATAATTTAGCAAATAGTTTTTACTTTTTTTTTAAATGCAAATAAGTTCACGTGA  
TATTATTA

TTTTGTTATCAAATATATATTTTTCGGAAGTCATATACATTAAATAAATTAACATTATTTTTAAAAATTA  
AAAAAATATATTTTAGCAAATAGTTTTTACTTTTTTTTTAAATGCAAATAAGTTCACGTGATATTATTAAT  
AATATTTT

TGACACGCTTGTTTTGGAAAACGTCATAGAAAAACCACGTGAAAAAAAAAAAAAAAAAAAAAAAAAAAAA  
AAAAGAAAAGGGCAGCTGCCAACTAGTACACACTACACAGATATTTATGAAAAACACTAACTTCTCCTTT  
TGGAAGTG

AAATATTGGGAGGTTTTAACTAATTTTTCCAGGATATTTCAACTTTTTATAAATCAAATTTTTTTTTACTTT  
TTTTTTTTGCTTTGCTATAGTATTTTAGAAAAGGACAAAAAATACGAAAAAGACAAAAACCATATAAAA  
AAATTGAT

AAATTTCTTCCAATTAACATCCCAGGCCTTGCTTCAATTTATCAATTGGTATATTAACCTTTCAACACATTT  
TGTTTTTGTTTTTATTTTTGTTTTTTTTATTTTTTTTTTTTTTTTCGCGTTTCGTGCTTTAATGAAACATGT  
GAAGTGTT

TGCCCCATTGATTCAAATGTCCATGCGCGTTGATTGATGTGTGATATATATATATATATATATATGTATATAG  
ATGTATATTATTATGTTTCAGAGGTGATTTTATCTTTGTACGCGTACCATTTTTGTAAAGTGACCTTGTTTT  
GACTTTTT

CGATTAATCTATTGTTTCAGCAGCTCTTCTCTACCCTGTCATTCTAGTATTTTTTTTTTTTTTTTTTTGGTTT  
TACTTTTTTTCTTCTGCTTTTTTTCTTGTACTTTTTTTCTAGTTTTTTTTCTTCCACTAAGCTTTT  
TCCTTGAT

ACTGAGATACTGCTGCAAGCGAAATATCACGAATAATAATATAAAAAAAAAAAAAAAAAAAAAAAAAAAGATG  
TTTAAATGTTAACAACCTAACAGCAATAAAAAATAAAAAATAAGGTAGAAGATTGCAAGAAAGAACTTTA  
CAATATTT

AGAATTATAAGAGGCGAAATCGATCAATTAGTTGAACAATTAACCTAAAAATCTAATATATATAAATATATA  
TATATATATATATAGGAAATATACGGCACGTTATACTAGAGATATTAACATCCCAACTCGGTTAATGGGT  
ACAATAAA

CATGAATGCTAAAAAAGAAATGACAAAAAAGAGAAAAAATAAATGAAACTACATAGTTAATTAATAAT  
AGAAGTATTTGTCAATAGTATGATAATGAAATCGATATTATGGAAGATATTAACCGCGCGCCGTATTAGTG  
TACACTAT

ATTGTTTCAGCAGCTCTTCTCTACCCTGTCATTCTAGTATTTTTTTTTTTTTTTTTTTGGTTTTACTTTTTTT  
TCTTCTTGCCTTTTTTTCTTGTTACTTTTTTTCTAGTTTTTTTTTCTTCCACTAAGCTTTTTCTTGATTT  
ATCCTTGG

AAGTTCCGCACTCCATCAAGTGAACCTCAACAGCTACACATTCTTTTATAATCCTTAATATTCTATATATA  
CATATATGAAAAATAGAAAACGCGAAAACCTTGTCATTTTTTTTTTTAGGCGTTTTTATAATATACTGAAAA  
TAAAAAGA

GGCTTCTTGTATATGATTCTAAAATAATGTGTGAAAAAATAAATAAAAAAAGAGGAAAAATAATAT  
AGAATAACTATTAAGTTTCATTAAAAAAACCATTTGAATATACGACCAAAAACGTTACGCTTTCATAAA  
GTGTGAAT

ATAGAAGTAAGGCGTTGCATTTCTTATAACTATCGTGTTTTATTTTCTTAGTGTTGGTTCTTTTATTATTA  
CCCCTTTTCTTCGGTAATATTTTATAGTGAAAAATTTTGGTAAAAAAAAAAAAAAAAAGAAAAATTTTTTT  
ATTTCAA

TTCGAATTTTATTTTTTTTTTTTTTTTTTTTTTTTTTTTTTTTTTTTTTTTTTTTTTTTTTTTTTTTTTT  
AATGATAATTTCTTGATTTACTAATTGTTTCATGACTTCTGGTGCTAAAGGGAAGGGGAAAAGGGAAGCGA  
AACTTCA

TACGTATGTAAAAAAGATCGGGGTGTAATAATCTATGCCAAGAAAAAATTAAAAACAAAATAAAAA  
AAAAAGAAACTTTCGGCTCTTCACTCTTAAAAGACAAAAAGTATTAGGATGATAAAAAAATTCATAAAAA  
AAAAAAT

CAATTAACATCCCAGGCCTTGCTTCAATTTATCAATTGGTATATTAACCTTTCAACACATTTTGTTTTTGTT  
TTTTTTTTTTTTTTTTTTTTTTTTTTTTTTTTTTTTTTTTTTTTTTTTTTTTTTTTTTTTTTTTTTTTTT  
GCAATGAC

TAACTCTTTTTCTAATAGGGGCAACTTACTTTTTGTTTTCTCATTGGCGAAAAAAGTAAGTAGAAATAAA  
TAAAAAATAATATTATAATGTGCTGTATATATAAATACAAATGCGAAAGCTAATGCAGATTTTGCCTAGT  
ACTCTCTA

ATAGAACCTTTTTTTATCTTCTTCACTTGTTCTGTTTTCTTTTTTTTTTTTTTTTTTTTTTTTTTTTCAAGTTCCA  
CGAAAAAATTTTCTCGTTTTCTTTAGTCACTCTTGTACATAAGGATTATCCGAACCCCGCCCGCGGAA  
TTAATTAG

ATGGAAGATATTAACCGCGCGCCGTATTAGTGTACACTATATTAACCTACATTTTGTCTTCTTACTGAATTT  
ATAAATTATGATTATATTATTACTATTATGACTACTGTATATATTTTTTTAGAATTAGCATCGGGAACC  
GATGAGCG

ACGTAGCCACAAAAAAGGTGAAAGGAAGCGAGCATTAAATTTTTTTTTTTTTTAAATATGTAAGTGT  
GATATGTATTAACAAAGTATCTTTCATAATTTTTGACGAATTTTTACTTCTTTTTTACTATTGAAGGTT  
GGGCTGTG

TGTATTCTTTTTTCTATTATTTAAAGGTTCAATTTCTATCGACGGTTTTTTAATTATATATATATATA  
TATATATATATGTATATAATGAATGTGTAATATTCCAAGTATACGTACCTTGGGTTTATATTTTTTAACTT  
GTATATTC

ATAGTGCGATATAGAACCTTTTTTATCTTCTTCACTTGGTCTGTTTTCTTTTTTTTTTTTTTTTTTTTT  
TCAAGTTCACGAAAAAATTTCTCGTTTTCTTTAGTCACTCTTGTACATAAGGATTATCCGAACCCG  
CCCCGCGG

TCTAATAGGGGCAACTTACTTTTTGTTTTCTCATTTGGCGAAAAAAGTAAGTAGAAATAAATAAAAAAATA  
ATATTATAATGTGCTGTATATATAAATACAAATGCGAAAGCTAATGCAGATTTTGCCTAGTACTCTCTAGA  
AATAGTAA

GGCGTTGCATTTTCTTATAACTATCGTGTATTTTTCTTAGTGGTGGTCTTTTTATTATTACCCGTTTTCT  
TCGGTAATATTTTATAGTAAAAATTTTGGTAAAAAAAAAAAAAAAAAGAAAAATTTTTTTTATTTCAAATC  
TCATCTCA

CGTCTCACTTCAATAGTGTCTCTTTCATGTACTGAGATACTGCTGCAAGCGAAATATCACGAATAATAATA  
TAAAAAAAAAAAAAAAAAAAAAAAAAAGATGTTTAAATGTTAAACAACCTAACAGCAATAAAAAATAAAAAA  
AAGGTAGA

TTATTTATCTTGTATTCTTTTTTCTATTATTTAAAGGTTCAATTTCTATCGACGGTTTTTTAATTATA  
TATATATATATATATATATGTATATAATGAATGTGTAATATTCCAAGTATACGTACCTTGGGTTTATAT  
TTTTTAAC

AACTATTTACTTAACTTTTAACTCGGGAAATATGTATCACTATACTAAAAACATTAATTTAATCAAAGAA  
AAATAAATTTAATGTATGTATCTATATATATATATATATATCACTTAAAACAGACAATAGCCATAATCAAC  
TGGGTTAT

GGGGTCTAGTCGACATGTTTGCTTGGTGTCTTAGCAGCTCTTATAGTTCTAATGCTATAACTAAGAAAGTA  
ATAATAATAATAAAAAAGCTTTATATAATGTTTTATTATGGAAGTTTCGTTTTTGTGGCGCGACGCGAT  
CAGCCAAA

TGCTGCAAGCGAAATATCACGAATAATAATATAAAAAAAAAAAAAAAAAAAAAAAAAAAGATGTTTAAATGTT  
AACAACTAACAGCAATAAAAAATAAAAAATAAGGTAGAAGATTGCAAGAAAGAACTTTACAATATTTTG  
TTTGGATG

AGGTTTCATGATGGAAACAACTATAAAGGATTGTCTTGTTCCTTTTTTTTTTTTTTTTTTTTTTTTTTT  
TATGACTAAATAAAGTAAATCATATGAGGTTTTATTTTTTATTTTCTGTTGATTTGGGTTACAGTATGGAAT  
GGGCATT

TTTTTTTTTTTTTTTTGGTTTTACTTTTTTTCTTCTTGCCTTTTTTCTTGTTACTTTTTTTCTAGTTTT  
TTTTCTTCCACTAAGCTTTTTCTTGATTTATCTTGGGTTCTTCTTTCTACTCCTTTAGATTTTTTTTT  
TATATATT

TTTTATTATTACCCGTTTTCTTCGGTAATATTTTATAGTAAAAATTTTGGTAAAAAAAAAAAAAAAAAGAAA  
AAATTTTTTTTTTAAATCTCATCTCATCTCTTAAAAAGGTTTATTCTGTTTACTCAAACCTTTCATCA  
AAAACAAA

TTTTTTTTTAAATAATGATGTACTTTAATACAATATATATATATATATATATATATATATATATATATAT  
AAGGAATGATAACTCTATTTAAGTAGATTATGACATTGTAGTAGAAGAGGGCGTGCTACTTGCGCTCTGTT  
TCTTCTTA

ACGATAAATTTCCCGTTTTCTTTTACTTTTTACTTTCATTTAATATAAATTCATATTTATTTCCCATGTACCA  
ATTAATTACTCATAAAAAGAACAGAAATAGAAAAAGTTGTATATAACAAGCCAAAAAAGAAAAA  
GGAAAAA





ATTATACGCGGGGATCCGGCGTCACAAGCCACGGCCCGTCCCGTCCGCGTGGTTTTTAATTCTGGCTCCGC  
GTAGTACATTTTGTAGCTTGCCTTTTTTCCGGCTTCTAGAAAACCTGGAAAAACCATAAGAAAAAATGGGA  
AGGGGAAA

GCAACTTACTTTTTGTTTTCTCATTGGCGAAAAAAGTAAGTAGAAATAAATAAAAAATAATATTATAAT  
GTGCTGTATATATAAATACAAATGCGAAAGCTAATGCAGATTTTGCCTAGTACTCTCTAGAAATAGTAATG  
TCCCTTTC

ATTCATCCTCGGCTTCTTGTATATGATTCTAAAATAATGTGTGAAAAAAAAAATAAATAAAAAAAGAGG  
AAAATAATATAGAATAACTATTAAGTTTCATTAAAAAAACCATTTGAATATACGACCAAAAACGTTACG  
CTTTCATA

TTTAATTCGGAAAAATAAAAAAAAAAAAAAAAAACATAAGGAAATTTTAATTAATAGTCTATCTACACATT  
TCCTAAAAGAAAATATTATTGCATTACTTTTTTGAAGATCTATAAAGGCACTGTCTTACTTTTTTAAATC  
TGACCCAC

CATCTACAAGCCCTATACCGAGGAAAGCGAATAGTCGCCATGCTAAACGCGCGGAACAAGGCCATATTTAT  
ATATTTAATGCTTTTAACTATTATTAGTTTTTCTCACCCAGGGCTGGTTTTCTTTACCCTGTGTGATGAAAG  
TGCGCGCC

AAATCTGTAACTTTTAAACTTCTGTTTCCGAACTCCTCATTTTTTCATGCATAAATATATAAATATATATA  
TATATATATATAAAGCATAACATTTTCACTACCATGGGGTATATGATCCTCCATTACGTATTCTAAAGTTTCG  
CGTTTTCT

CCATCATGGTCCGGTAACGGTTCGTAGTGAATGACTCATATTTTTCCATCTCTTTCCGGCCTTGCCAAAAAAT  
GAAAAAAAAAAAAAAAAAAAAAAAAAAAAAAAAATTAACACGATGTCCAGAATCACAACATAACATAGTTTTGC  
CTCTTACT

CTCCATCAAGTGAACCTCAACAGCTACACATTCTTTTATAATCCTTAATATTCTATATATACATATATGAA  
AAAATAGAAAACGCGAAAACCTTGTCAATTTTTTTTTTAGGCGTTTTTATAATATACTGAAAATAAAAAGAGG  
CTCTTTAA

TTTAGTGAAAAATACTGAACAATGAAATTTCAATATCGCATATAATAATTTTTGTTATCAAAATATATATT  
TTTCGGAAGTCATATACATTAATAATTAACACATTATTTTTTAAAAATTAAAAAATATATTTTAGCAAAT  
AGTTTTTA

ATGACAAAAAAGAGAAAAAATAAATAAATAAATAAATAAATAAATAAATAAATAAATAAATAAATAAATAAATA  
TGATAATGAAATCGATATTATGGAAGATATTAACCGCGCGCCGTATTAGTGTACACTATATTAACACTACAT  
TTTGCTTC

TTTATTTTTTTTTCTAGGAATAAAAAATGAAGAACGGGAAGAAAAGGAAAAATGAAAATGAAGAATATGAAG  
AGTAAACCTACTTAAAAAAAAAACCATACTTTAGTATTTAATGTAGCTACCACGCGTATTCGATACACTA  
TTATTTTT

AAAAAGGTGAAAGGAAGCGAGCATTAATTTTTTATTTAATATGTAACGTGTGATATGTATTAACAAAGTAT  
CTTTCATAATTTTTGACGAATATTTTTACTTCTTTTTTACTATTGAAGGTTGGGCTGTGATTTCATCGCGCA  
GAAAACAA

ACTGAGCAATAAACGTTTTCTTACCTTTTCCGGTCTTTTGGACTCTCCAACCAGAAAGTTAAAGGGCAAAA  
AAGCTCACATGACACGCTTGTTTTGGAAAACGTCATAGAAAAACCACGTGAAAAAAAAAAAAAAAAAAAAAA  
AAAAAAG

AAGATGACAAGGTAATGCATCATTCTATACGTGTCATTCTGAACGAGGCGCGCTTTCCTTTTTTCTTTTTG  
CTTTTTCTTTTTTTTTCTCTTGAACCTCGAGAAAAAATAAATAAAGAGATGGAGGAACGGGAAAAAGTTAG  
TTGTGGTG

TTCTAGTATTTTTTTTTTTTTTTTTTTTTGGTTTTACTTTTTTTTCTTCTTGCCTTTTTTTCTTGTTACTTTTT  
TTCTAGTTTTTTTTTCTTCCACTAAGCTTTTTCTTGATTTATCCTTGGGTTCTTCTTCTACTCCTTTAG  
ATTTTTTT

ATGGAAACAAACTATAAAGGATTGTCTTGTTCCTTTTTTTTTTTTTTTTTTTTTTTTTTTTTGTTTTTTATGACTAAA  
TAAAGTAAATCATATGAGGTTTTATTTTTTATTTTCGTTGATTTGGGTTACAGTATGGAAATGGGGCATTGG  
ACACAAGT

TTGTAAACAACGTCTCACTTCAATAGTGTCTCCTTCATGTACTGAGATACTGCTGCAAGCGAAATATCACG  
AATAATAATATAAAAAAAAAAAAAAAAAAAAAAAAAAAGATGTTTAAATGTTAACAACCTAACAGCAATAAAA  
AATAAAAA

TTTTCGTCAATCAATTTGTTGATATTTGTCTTTCAAACGCGGTTTTAACATATCGCGAACAACGGTATTCGG  
GTAACAGCCTATCACTATTTTTACCGGCGGCTATTTTTCTAAACCTAGTATATATACGCGAAAATTGGCT  
ACCTGCAA

CCCAGGCCTTGCTTCAATTTATCAATTGGTATATTAACCTTTCAACACATTTTTGTTTTGTTTTATTTTTG  
TTTTTTTTATTTTTTTTTTTTTTTTTTTCGCGTTTTCGTGCTTAAATGAAACATGTGAAGTGTTCGCAATGACTA  
AGTAGCCT

GCTTCAATTTATCAATTGGTATATTAACCTTTCAACACATTTTTGTTTTGTTTTATTTTTGTTTTTTTTAT  
TTTTTTTTTTTTTTTTTTCGCGTTTTCGTGCTTAAATGAAACATGTGAAGTGTTCGCAATGACTAAGTAGCCTCC  
ACAGATGA

GTGGTGGTTCTTTTATTATTACCCGTTTTCTTCGGTAATATTTTATAGTGAAAAATTTTGGTAAAAAAAA  
AAAAAAGAAAAATTTTTTTTTATTTCAAATCTCATCTCATCTCTTAAAAAGGTTTATTCTGTTTACTCAA  
CTCTTCAT

AAAATAAAAAATAAAATTTTTTTCTCCGATAATCAATTTTCTTAATTAATTAATTGCGTTACGATTCCGT  
TTTTTTACTTCTTTTATCTCATTATCTATCTAAGTTATTTAAAAAAGAAAGAACTTTTTATGAACTTTC  
CTCTTTTC

AGCTCTTCTCTACCCTGTCATTCTAGTATTTTTTTTTTTTTTTTTTTTTGGTTTTACTTTTTTTCTTCTTGCC  
TTTTTTCTTGTTACTTTTTTTCTAGTTTTTTTTCTTCCACTAAGCTTTTTCTTGATTTATCCTTGGGT  
TCTTCTTT

GTTCTTTTCTTTTTTTCTTTATTCTTTTTTCTCCTCTTTATGAATACAGATATTCAATTTTTTGAATATC  
TGATTGTTTTTATTTTCATTTCAATTTTTTTTTTTTTTCAATTTTTTTTATCCGATCGTTGCGCCAAGCTT  
CTATCGCT

TCATATACATTAATAAATAAAACATTATTTTTAAAAATTAATAAATAATATTTTTAGCAAATAGTTTTTAC  
TTTTTTTTAAATGCAAATAAGTTCACGTGATATTATTAATAATATTTTACCCAAAAATATGAGGGCATCG  
GAAAATTT

CACCAAAACCAAGAAAGTAGTTGACAAAAAATGAAAACCACTATTATTTAAATTACGGAAAAAAAAAAC  
CAATAAACAAAAACATAATAAAGAAATGAAAAAAGAATATTAGTAGAGCATACTGAATTGTTTTCAG  
AAAGAGAG

ATTGTTATTCCGATTAATCTATTGTTTCAGCAGCTCTTCTCTACCCTGTCATTCTAGTATTTTTTTTTTTTT  
TTTTTGGTTTTACTTTTTTTCTTCTTGCCTTTTTTTCTTGTTACTTTTTTTCTAGTTTTTTTTCTTCCA  
CTAAGCTT

AAAGTGGCATTGAAATTTAGCTTTTTTTTTATTTAGGAGAAACAATATATATATATATGTATATACGTATGT  
ATGATTCATATTTAATCGCATTTTTATTTTCATCTAAAACAATTACTTTTTTGATTATTTATAGAAAAA  
ACAACAA





CCGGTAACGGTCGTAGTGAATGACTCATATTTTTCCATCTCTTTCCGGCCTTGCCAAAAAATGAAAAAAAA  
AAAAAAAAAAAAAAAAAATTAAAAACGATGTCCAGAATCACAACATAACATAGTTTTGCCTCTTACTGG  
CTTGATTG

TTTTTAGTACGAGGTGTACGGACAAAAGATACTAACGGACAAAACGCGGTTGCAACTGAAATTTTTTTTTTC  
ACTATTTTCGTAGGGCACATTGGTGTAAATATATATATATACTCAAGGTTTCATCTCGTTTTTTTTTAATA  
TTCTTGTT

AGGTTTTAACTAATTTTTCCAGGATATTTCAACTTTTTATAAATCAAATTTTTTTTTTACTTTTTTTTTTGCT  
TTGCTATAGTATTTTAGAAAAGGACAAAAAATACGAAAAAAGACAAAAAACCATATAAAAAAATTGATTA  
GAAGAACT

TTTCTAATTATTCCGTTAGCGCCGCTTACTTTTTAATGTTCTTAAGATAAAAAAACATCATTAATATTATTA  
TTAAAAAATTCATATATATACCTATATCTATATGCACTATTTATGCTTCCACTTTTCTTTCTTTCTAAAT  
ACATCATT

GAATAATAATATAAAAAAAAAAAAAAAAAAAAAAAAAAAGATGTTTAAATGTTAACCAACCTAACAGCAATAAA  
AAATAAAAAATAAGGTAGAAGATTGCAAGAAAGAACTTTACAATATTTTGTGGATGCCCAACACCGGC  
GTCTTGTT

GGTAATGCATCATTCTATACGTGTCATTCTGAACGAGGCGCGCTTTCTTTTTTCTTTTTGCTTTTTCTTT  
TTTTTCTCTTGAACCTCGAGAAAAAATATAAAAGAGATGGAGGAACGGGAAAAAGTTAGTTGTGGTGAT  
AGGTGGCA

GAATATATTTAATGACGGGAAAAGAACACGGGAAACGCTACTATTGTTGTATAGTGCGATATAGAACCTTT  
TTTTATCTTCTTCACTTGTTCTGTTTTCTTTTTTTTTTTTTTTTTTTTTTTTTTTCAAGTTCACGAAAAAATT  
TCTCGTTT

AAATAAACCTTTCTCTTTTTTACGGCGACCATACTTTTTTTTTCTAATCCTTTTTCAAGTTTAAATCCA  
TGATTTAATATCTATTTATAACATAAATAATATAAGTAATGGTTAATGCATTGTTTCAAAAAAATAA  
AAAAAAA

ATCAATTGGTATATTAACCTTTCAACACATTTTGTTTTTGTTTTTATTTTTGTTTTTTTTTATTTTTTTTTT  
TTTTCGCGTTTTCGTGCTTAAATGAAACATGTGAAGTGTTCGCAATGACTAAGTAGCCTCCACAGATGATC  
AGCAGGTA

AGTTGTTCTTTACGTGCATCGATCATATAAGAAAAGGGAAAAAAGCCGTAAAGTAAAAAATAAAGAGCTT  
TCCATGGCTGGTTTTTTTTTCTTTTTTTTTTTTTTTTTTTGAAGACTACAGCAGGTATTACCCGGAGTGAAA  
AGGTTTCT

GGTTGCCATGGGACACAAAACGTAGCCACAAAAAAAAAAAAAAAAAGGTGAAAGGAAGCGAGCATTATTTT  
TTATTTTAAATATGTAACGTGATATGTATTAACAAAGTATCTTTCATAATTTTTGACGAATTTTTTACTT  
CTTTTTTA

GGACATCCGGCCATCGCGCGGGCCCGGTATTTGATCTCCGTTTTAGAAGCACAGAAAAAATAATATGA  
TGTTATGATGTTTAAATAGATGGATTCATATCGTCCGGTAAAAACGCTTTTGGAGAAATCAAGGAAAATCG  
CCGAGATC

CATTCTATACGTGTCATTCTGAACGAGGCGCGCTTTCTTTTTTCTTTTTGCTTTTTCTTTTTTTTTCTCT  
TGAACCTCGAGAAAAAATAAAGAGATGGAGGAACGGGAAAAAGTTAGTTGTGGTGATAGGTGGCAAG  
TGGTATTC

AGAAACCTGTATTCATCCTCGGCTTCTTGTATATGATTCTAAAATAATGTGTGAAAAAAAAAATAAATAA  
AAAAAAGAGGAAAATAATATAGAATAACTATTAAGTTTCATTAAAAAAACCATTTGAATATACGACCAA  
AAACGTTA

AAATAGTGACTTTAATTCGGAAAAATAAAAAAAAAAAAAAAAAACATAAGGAAATTTTAAATTAATAGTCTA  
TCTACACATTTCTAAAAGAAAATATTATTGCATTACTTTTTTTGAAGATCTATAAAGGGCACTGTCTTACT  
TTTTAAAA

TGGAAATGAGCCAAAAGATTCTTTTGCTTGAGCACAGAGGTGAGATGCCCAAGTGAGAATTTTTTTTTAAA  
TAATGATGTACTTTAATACAATATATATATATATATATATATATATATATATATAAAGGAATGATA  
ACTCTATT

AACATTAATTTAATCAAAGAAAAATAAATTTAATGTATGTATCTATATATATATATATATATATCACTTAAAA  
CAGACAATAGCCATAATCAACTGGGTTATTATTATACAATATTAAGGAAGAACGCATATTTGAAAAAAAA  
ATAAATG

TTGCAAAAATAAACTCTACTCACGCACACTGGAATGAATGGCAATATTCTTTTTTAGGTTAACCGGCCGG  
ACAGTAATATAGTAATCGTTTTGTACGTTTTTCAAGAAGCGACGCACAACACTGTTTTCCATTTTTTTTTTT  
TTTTTTCA

CGATCAATTAGTTGAACAATTAACCTAAAATCTAATATATATAAATATATATATATATATATATAGGAAAT  
ATACGGCACGTTATACTAGAGATATTAACATCCCAACTCGGTTAATGGGTACAATAAAAAAAAAAGAGGGAT  
TAATGTTT

AAAATAATGTGTGAAAAAAAAATAAATAAAAAAAAAAGAGGAAATAATATAGAATAACTATTAAGTTTCA  
TTAAAAAAAAACCATTTGAATATACGACCAAAAACGTTACGCTTTCATAAAGTGTGAATAAGCAAGGGAAC  
TATACTTG

TTTTCGGAAGTCATATACATTAAATAAATAAAACATTATTTTTAAAAATTAATAAATATATTTTTAGCAAA  
TAGTTTTTACTTTTTTTTTAAATGCAAAATAAGTTCACGTGATATTATTAATAATATTTTACCCAAAATAT  
GAGGCAT

GTAGTGAGGCGATTAGATGTCGTTTTTCATGTACAATAATGATATTATTTTTTTTTTTCAATTTTTAGTAT  
TTTACATGGCATTCTTACACTTTTATAAAGTATTATTTATATTACTAGTAGCAGTAAGTGATCGCCCTTTT  
TTTTAGCA

GTAGTCTAATGTTCTTTTTCTTTTTTTCTTTATTCTTTTTCTCTCTTTATGAATACAGATATTCAATTT  
TTTGAATATCTGATTGTTTTTATTTTCATTTCAATTTTTTTTTTTTTTTCAATTTTTTTTTATCCGATCGTTG  
CGCCAAGC

AGTTTTTTTTTTTTGTTTTACCATAACAAAGAGATGGAAAGTTATACTAGATAAAGATTTTTAAAAAATAT  
AAAAGAAAATAAAACGAAATTTATATTTTACACAGTGCATCTTGTCCCTCTCTTCTCGCTAAAACCTTAGT  
TTCTTCTT

ATTGTCTTGTTTCCTTTTTTTTTTTTTTTTTTTTTGTTTTTTATGACTAAATAAAGTAAATCATATGAGGT  
TTTATTTTTTATTTGTTGATTTGGGTTACAGTATGGAAATGGGGCATTTGACACAAGTTATTTTTATTCAT  
ATGTTTTA

ATAGAGAGCTTTTAAATTTTTATTTTTTTTCACTTGTATTTTTGACGGGCTATTAATTTTTAAATGAACTTT  
TCTACATGATGGAACATAAACATAAATATAGGTATAGATAAATTGTTCTTCTTTTTTTTTTTTTTTTTTTT  
AGAGAAAG

AGTTGTACAAAAATAGTGACTTTAATTCGGAAAAATAAAAAAAAAAAAAAAAAACATAAGGAAATTTTAAAT  
AAATAGTCTATCTACACATTTCTAAAAGAAAATATTATTGCATTACTTTTTTTGAAGATCTATAAAGGGCA  
CTGTCTTA

GGCAATATTCTTTTTTAGGTTAACCGGCCGGACAGTAATATAGTAATCGTTTTGTACGTTTTTCAAGAAGC  
GACGCACAACACTGTTTTCCATTTTTTTTTTTTTTTTTTTTTCAGTGATCATCGTCCATGAAAAAATTTTTTCAT  
TGTCTCTT

GGACACAAAAACGTAGCCACAAAAAAAAAAAAAAAAAGGTGAAAGGAAGCGAGCATTAAATTTTTTATTTAAT  
ATGTAAGTGTGATATGTATTAACAAAGTATCTTTCATAATTTTTGACGAATATTTTTACTTCTTTTTTACT  
ATTGAAGG

GTTTTAACATATCGCGAACACGGTATTCGGGTAACAGCCTATCACTATTTTTACCGGCGGCTATTTTTCC  
TAAACCTAGTATATATACGCGAAAATTGGCTACCTGCAAAATTCCAATAGTGGCGAATGTATTGGAATTAA  
TCTGCAAG

GCTTGGTGTCTTAGCAGCTCTTATAGTTCTAATGCTATAACTAAGAAAGTAATAATAATAATAATAAAAAAG  
CTTTATATAATGTTTTATTATGGAAGTTTTCGTTTTTGTGGCGCGACGCGATCAGCCAAAATCAGCGGAAAA  
ATTCGTCG

TAAAAAGAAAAAGCGAATATTTCAACACTGTGTTCTAAGAAAAGGCTCTATAGCTTTTTTTATTAGTTTT  
ATTAATTTGAAAAATGCCTTGTGTTTTATATATATATATGTGTGTATTTAGGGCAGCCGCGCCAACAG  
GGGTATG

ATTTTTTTTTTTTTTTTTTTTTTTTTTTTTTTTTTTTTTTTTTTTTTTTTTTTTTTTTTTTTTTTTTTTTTT  
CTTGATTTACTAATTGTTTTCATGACTTCTGGTGCTAAAGGGAAGGGGAAAAGGGAAGCGAAAACCTCAAG  
AGCAGAAC

TATACTTTTTCCCTGCATAATCATCCACTTTTTTTTTTTTTTTTTTTTTTTTTTTTTTTTTTTTTTTTTTTA  
TTGTATAATACATTTTTTACCCACTACTGCGGTTTTATTGTAATATTTTTGTGAGATTTTATGAATGCGTTCCA  
TCATCTAT

GAAATATCACGAATAATAATATAAAAAAAAAAAAAAAAAAAAAAAAAAAAAAAAAAGATGTTTAAATGTTAACACCTAA  
CAGCAATAAAAAATAAAAAATAAGGTAGAAGATTGCAAGAAAGAACTTTACAATATTTTGTGTTGGATGCC  
CAACACCG

TTAACTTTTTAACTCGGGAAATATGTATCACTATACTAAAAAACATTAATTTAATCAAAGAAAAATAAATTT  
AATGTATGTATCTATATATATATATATATATATATATATATATATATATATATATATATATATATATAT  
TTATACAA

GTGTCATTCTGAACGAGGCGCGCTTTTCTTTTTTCTTTTTGCTTTTTTCTTTTTTTTTTCTTCTTGAACCTCGAG  
AAAAAAAAATATAAAGAGATGGAGGAACGGGAAAAAGTTAGTTGTGGTGATAGGTGGCAAGTGGTATTCCG  
TAAGAACA

ATGAATACAGATATTCAATTTTTTGAATATCTGATTGTTTTTATTTTCATTTCAATTTTTTTTTTTTTTTTCA  
ATTTTTTTTTATCCGATCGTTGCGCCAAGCTTCTATCGCTTAAAACAATGACACTTCGCTGTGAAATGACAC  
AATGGCTT

TTGAATATTTGGAATGAGAAAGAAATATAGTTACATAATGTACAAAAAGAAGCAAGAAAGGAATATATAT  
ATATATATATATATATATATATATATATATATATATATATATATATATATATATATATATATATATATAT  
CCTCGAAA

GAAAAGAAATCTTTATTTACAAAAATTTCTCCCCACTTTTAAATGTAATTTTTCTTTATATAATATATAT  
ATATATATACATGAGTATCAATACAATATAACCTAATCTAGCTTTTTATCCAATGGACTTGACTATCATCA  
GTACTAGA

TCGTAGTGAATGACTCATATTTTTCCATCTCTTTTCGGCCTTGCCAAAAAATGAAAAAAAAAAAAAAAAAAAA  
AAAAAAAAATTAACGATGTCCAGAATCACAACATAGTTTTGCCTCTTACTGGCTTGATTGGA  
AGTTAGCT

AGAAATATAGTTACATAATGTACAAAAAGAAGCAAGAAAGGAATATATATATATATATATATATATATATAT  
ATATGTATATTGTTATTTAGAATATCTCTCTCTCTTTCGAGAATCTCTATATCTCTCGAAAAGAACTTTTAGC  
ATATTCAC



TGCTGCACGTGTAGTCTAATGTTCTTTTCTTTTTTTTTCTTTATTCTTTTTTCTCCTCTTTATGAATACAGA  
TATTTCAATTTTTTTGAATATCTGATTGTTTTTATTTTCATTTCAATTTTTTTTTTTTTTTCAATTTTTTTTTAT  
CCGATCGT

TTAGCAGCTCTTATAGTTCTAATGCTATAACTAAGAAAGTAATAATAATAATAATAAAAAAGCTTTATATAA  
TGTTTTTATTATGGAAGTTTCGTTTTTGTGGCGCGACGCGATCAGCCAAAATCAGCGGAAAAATTCGTGCGGA  
ACATTTTT

TCCCCGTTTTCTTTTACTTTTACTTTCATTTAATATAAATTCATATTTATTTCCCATGTACCAATTAATTACT  
CATAAAAAGAACAGAAATAGAAAAAAGTTGTATATAACAAGCCAAAAAAAAGAAAAAAAAGGAAAAAAA  
GAAAACAC

CAATCAGGTTGGGGTCTAGTCGACATGTTTGCTTGGTGTCTTAGCAGCTCTTATAGTTCTAATGCTATAAC  
TAAGAAAGTAATAATAATAATAATAAAAAAGCTTTATATAATGTTTTATTATGGAAGTTTCGTTTTTGTGGC  
GCGACGCG

GTTTTCAATCCACCAAAACCAAGAAAGTAGTTGACAAAAAATGAAAACCACTATTATTTAAATTACGGAA  
AAAAAAAACCAATAAACAAAAAACATAATAAAAGAAATGAAAAAAAAGAATATTAGTAGAGCATACTGAA  
TTGTTTTTC

AAAAGCAAGAGCAGCAAGAGCAGGACAAAAAGAAAAAATCTAACCATTAAAAACGGCGATATATATTGGGC  
ATAAAACCTATATAAAATAACAGCAATAATAAAATGCAAAATATAACATAGCACGGTATAGTTAGCTCAT  
ATATGTTT

TCGCCTTTCCTGCCCATTTGATTCAAATGTCCATGCGCGTTGATTGATGTGTGATATATATATATATATAT  
ATGTATATAGATGTATATTATTATGTTTACAGAGGTGATTTTATCTTTGTACGCGTACCATTTTTGTAAAGTG  
ACCTTGTT

GAAAATCCTACTCTGTAATAAAATAATCCCGGGTAATGGATTGGATTTTTCTATCAGGATCGTTTACGTA  
TATATAATACACTGTGCGAGTTTAGCGCGCTTACAGCCGCTACTTGTGGAGTCCTTTTTTTTTTTTTTTTT  
TTGGGGTT

TGAGTGTGCAAGAAACCTGTATTATCCTCGGCTTCTTGTATATGATTCTAAAATAATGTGTGAAAAAAA  
AATAAAATAAAAAAAGAGGAAAATAATATAGAATAACTATTAAGTTTCATTAAAAAAACCATTTGAAT  
ATACGACC

ATAACTACAGAAATATTGGGAGGTTTTAACTAATTTTTCCAGGATATTTCAACTTTTCATAAATCAAATTT  
TTTTTACTTTTTTTTTTGTCTTTGCTATAGTATTTTAGAAAAGGACAAAAAATACGAAAAAAGACAAAAA  
CCATATAA

AGTTTTTTTTTTAATGTTCTTCTCTCTCTTCTTCTGTTTTTTCATGGCAATAATTTTACTAGTTTTTCT  
TTTTTTTTTTTTTTTTTTTTCATTCTTTTTTCATTATTACTTAAGTTCTGTAAAGATATATGGAAGAGAAAATAA  
AAAGAATA

CCAGTCTTTTTGTCTCTTTTTTTTTTTTTCTTCTTTTTTTTTTTTTTTTTTTTTTTTTTTTGCAGCATTATGATAGAA  
CAATAGGGCTCAAGATCGCACCAAGGCTAACAGTAACGGTATACGCAATCGTAGTGAAAGTGATTTTCAAT  
CAAGCATC

CAGGACAAAAAGAAAAAATCTAACCATTAAAAACGGCGATATATATTGGGCATAAAACCTATATAAAATAA  
CAGCAATAATAAAATGCAAAATATAACATAGCACGGTATAGTTAGCTCATATATGTTTTAACGAGCCTTA  
CATTATAT

AAGATTTGAACCGCGCGGAATTCACATTGCAGTATGGACGGACATCCGGCCATCGCGCGGGGCCCGGTA  
TTTGATCTCCGTTTTAGAACACAGAAAAAATAATATGATGTTATGATGTTTAATAGATGGATTCATATC  
GTCCGGGT

ACCATTGACGACACTGCCTCCCAAATTTTAAAATTTGAGGGCAGAATATAAACTTTAAATGAAAATAGATA  
ATATTTATATATATTAACGTTATTACAATTATTTTTTATCATCTAGTACATCTCTGCGCATTTCCTCTTC  
TATATACA

CAGAAAATTCGTTTTCAATCCACCAAAACCAAGAAAGTAGTTGACAAAAAATGAAAACCACTATTATTTA  
AATTACGGAAAAAACAATAAACAAAAACATAATAAAAGAAATGAAAAAAGAATATTAGTAGA  
GCATACTG

CGGGCAAAGCGAGACGATGCAGTAATCAGCGGCAATGAACTACGTATGTAAAAAAGATCGGGGTGTAAA  
AATTCTATGCCAAGAAAAAATTAAAAAACAAATAAAAAAGAACTTGCGGCTCTTCACTCTTAAA  
AGACAAAA

CTCTTTTTTTTTTTTTTTTTTTTTTTTTCTCCTTCATTTTGACTTTTCCTTCTGTGTTAACATGATGAGTTT  
ATACGTGCATCCTAACTAGTAGAATGTATATATATTATATTATGATTATATATATAATTTTGATTAATA  
ACAATTAT

GGAATGAGAAAGAAATATAGTTACATAATGTACAAAAAGAAGCAAGAAAGGAATATATATATATATATAT  
ATATATATATATATGTATATTGTTATTTAGAATATCTCTCTCTCTCGAGAATCTCTATATCCTCGAAAA  
AACTTTTA

ATATGATTCTAAAATAATGTGTGAAAAAATAAAATAAAAAAAGAGGAAAATAATATAGAATAACTA  
TTAAGTTTCATTAAAAAAACCATTTGAATATACGACCAAAACGTTACGCTTTCATAAAGTGTGAATAA  
GCAAGGGA

ATCTATAGGGCATATACAAAAAAGGTAGGTGTAAAAGATAATAAAATACAACCCTATTAGCTTTGAT  
AAAAAATTAGTAGGGTTAGAATGTCATATGGTAGGGTGATATAAACGCGTGAACCTTACGCGTTTATATGT  
ACTAAGTT

ATTTTTAACTTGTATATTCTTTTACGATAAAATTTCTTCCAATTAACATCCCAGGCCTTGCTTCAATTTA  
TCAATTGGTATATTAACCTTTCAACACATTTTGTGTTTTGTTTTATTTTTGTTTTTTTTTTTTTTTTTT  
TTTCGCGT

TACCACATTGTTTCTAATTATTCCGTTAGCGCCGCTTACTTTTTAATGTTCTTAAGATAAAAAACATCATT  
AATATTATTATTAATAAATTCATATATATACCTATATCTATATGCACTATTTATGCTTCCACTTTTCTTT  
CTTTCTAA

TTTACGGCGACCATACTCTTTTTTCTAATCCTTTTCAAGTTTAAATCCATGATTTAATATCTATTTATA  
CATATAAATAATATAAGTAATGGTTAATGCATTGTTTCAAAAAAATAAAAAAAGGGAAGAAAT  
ATATATAA

AAATTTGAGGGCAGAATATAAACTTTAAATGAAAATAGATAATATTTATATATATTAACGTTATTACAATT  
ATTTTTTATCATCTAGTACATCTCTGCGCATTTCCTTCTATATACAGCTTAATATGTGCAAAACGCGA  
AGCAAGAA

AACAACCTTTTGAATATATTTAATGACGGGAAAAGAACACGGGAAACGCTACTATTGTTGTATAGTGCATA  
TAGAACCTTTTTTATCTTCTTCACTTGTTCTGTTTTCTTTTTTTTTTTTTTTTTTTTTTTTTTTCAAGTTCCAC  
GAAAAAT

ATAAAAAAGATGTTTAAATGTTAACCAACCTAACAGCAATAAAAAATAAAAT  
AAAGGTAGAAGATTGCAAGAAAGAACTTTACAATATTTGTTGGATGCCAACACCGGCGTCTTGGTGT  
TCTTCTAT

TATGTATAGCAGAATTATAAGAGGCGAAATCGATCAATTAGTTGAACAATTAACCTTAAATCTAATATATA  
TAAATATATATATATATATATAGGAAATATACGGCACGTTATACTAGAGATTTAAACATCCCAACTCG  
GTTAATGG

TTATAGTTCTAATGCTATAACTAAGAAAGTAATAATAATAATAATAAAAAAGCTTTATATAATGTTTTATTA  
TGGAAGTTTTCGTTTTTGTGGCGCGACGCGATCAGCCAAAATCAGCGGAAAAATTTCGTCGGAACATTTTTTT  
CTTTTTTG

TTTTTTTTTTTTTTTTCTCCTTCATTTTGACTTTTCCTTCTGTGTTAACATGATGAGTTTATACGTGCAT  
CCTAACTAGTAGAATGTATATATATTATATTATGATTATATATATAATTTTGATTAAAAATAACAATTATCT  
TAAGAAAA

AAATTTTTGTTGTGCACAAAAGTATTATTGTAATCTCCCGCCTTTGCTAAAGACGCGTAAGAAAAAAGT  
ACAAATAATGCCCTATAAAGAAAAAATTTAAATAAACGCGAACTTAGTTTGGACGTAATACTTCTCCTT  
CTCGGGCC

TTTCCTCTTTTTTACGGCGACCATACTCTTTTTTCTAATCCTTTTCAAGTTTAAATCCATGATTTAATA  
TCTATTTATACATATAAATAATATAAGTAATGGTTAATGCATTGTTTCAAAAAAAAAATAAAAAAAAAAG  
GGAAGAAA

GCAGCAAGAGCAGGACAAAAAGAAAAATCTAACCATTAACCGGCGATATATATTGGGCATAAACCTA  
TATAAATAACAGCAATAATAAATGCAAAATATAACATAGCACGGTATAGTTAGCTCATATATGTTTTA  
ACGAGCCT

CTTCTAAAAATAACGGAGTTTGAATCTCTAAATCTGTTTTAACTTCTTTTTACTATTATTTTTAGTCTTAG  
TATCTCATCTCATCTCAATTTCTATATCCACTATAAAATTTTTCACTCTTTCTGCGCGCCAATGTCCC  
CGCAACTA

TTGTCCCCGTTTCTAATGTTAACTCTTTTTCTAATAGGGGCAACTTACTTTTTGTTTTCTCATTGCGGAA  
AAAAAGTAAGTAGAAATAAATAAAAAAATAATATTATAATGTGCTGTATATATAAATACAAATGCGAAAGC  
TAATGCAG

TTACTACAAAACGATAAATTTCCCGTTTTCTTTTACTTTTACTTTCATTTAATATAATTCATATTTATTTT  
CCATGTACCAATTAATTACTCATAAAAAGAACAGAAATAGAAAAAGTTGTATATAACAAGCCAAAAA  
GAAAAAA

CCCCTGATTTCCCAAATTTTTTATGCATATACAAATGTTGAAAAGAAACGAATATTATTAGCAAGTAATAT  
ATAGTATATAGTATATATATATATTTATATATGTAAACATATAATGAATATATAAATTGGTATGTAAAGA  
GTTGCGAG

CAGTATGGACGGACATCCGGCCATCGCGCGGGGCCGGTATTTGATCTCCGTTTTAGAAGCACAGAAAA  
AATAATATGATGTTATGATGTTTAAATAGATGGATTCATATCGTCCGGTAAAAACGCTTTTGGAGAAATCA  
AGGAAAAT

TTCTGTCTCTGTTATATTTCCACATGTCATCATTTCAAATATATGTACTTTAAAGAAAAATAAATAAAAA  
TAAATTTTTTTCTCCCGATAATCAATTTTCTTAATTAATTAATTGCGTTACGATTCCGTTTTTTTACTTC  
TTTTATCT

TTTTTTTTTCCCTAATGCATACATGATTTTTACGTCTTTATATAAATACTGTTCTATTCTATTTCTAGCCTA  
GTTTAATTATAAATAATCTATAATGTTTTTTTATATATCCGCATATCTGTGAGCTTGGGTATACAGAAAA  
AAATGGCA

ATCTTTTCTTTATACTTTTCCCTGCATAATCATCCACTTTTTTTTTTTTTTTTTTTAATTCATTTTCAAG  
ATTTTAGACGTTGTATAATACATTTTACCCACTACTGCGGTTTATTGTAATATTTTGTGAGATTTTATGA  
ATGCGTTC

TGACTCATATTTTTCCATCTCTTTCCGGCCTTGCCAAAAAATGAAAAAAAAAAAAAAAAAAAAAAAAAAT  
TAAAAACGATGTCCAGAATCACAACATAGTTTTGCCTCTTACTGGCTTGATTGGAAGTTAGCTGT  
TAAATTTT

GGCACCCACCCATCGCATATCAGGAGAACTTCCTGTGCATACGGGACAGCAGAGATAGGCTGTTCTCGCG  
CGTTTTTTTTTTTTTTTTGCTTTTTTTGGTTCCTTCGCGGATATCGTATTATCGATATTACAACAAAAAT  
GTTTGGAG

TCAATTTCTATCGACGGTTTTTTAATTATATATATATATATATATATATATATGTATATAATGAATGTGTAA  
TATTCCAAGTATACGTACCTTGGGTTTATATTTTTTAACTTGTATATTCTTTTACGATAAAAATTTCTTCCA  
ATTAACAT

AACTTTTCATAAATCAAATTTTTTTTACTTTTTTTTTTGCTTTGCTATAGTATTTTAGAAAAGGACAAAAA  
AATACGAAAAAAGACAAAAACCATATAAAAAAATTGATTAGAAGAACTTATAATGGCATTGGCAAATTC  
AGACCTTT

AACTAATTTATCACCGCTAACGTTACGCGTTTGGCGTCTAAAAAAAAGAAGGAAAAAAAACCTATTTAT  
TCACTCTATTTTCCATATAAACGACATATAAATATTATACAGATGATGAAAGCCCACAAATTATGTTTGT  
AGCGTTCT

CCATCGCGCGCGGGCCCCGGTATTTGATCTCCGTTTTAGAAGCACAGAAAAAATAATATGATGTTATGATG  
TTTTAATAGATGGATTCATATCGTCCGGGTAAAAACGCTTTTTGGAGAAATCAAGGAAAATCGCCGAGATCAC  
TAGGAAAT

AGCCAAAGACAAGTTCGCGACTCCATCAAGTGAACCTCAACAGCTACACATTCTTTTATAATCCTTAATAT  
TCTATATATACATATATGAAAAAATAGAAAACGCGAAAACCTTGTCAATTTTTTTTTTAGGCGTTTTTATAAT  
ATACTGAA

ATCCTTAATATTCTATATATACATATATGAAAAAATAGAAAACGCGAAAACCTTGTCAATTTTTTTTTTAGGC  
GTTTTTATAATATACTGAAAATAAAAAGAGGCTCTTTAAATGTTGACACTCTACTCCAATATCAACTGTAA  
AAAATCTC

TACGTGCATCGATCATATAAGAAAAGGGAAAAAAGCCGTAAAGTAAAAAATAAAGAGCTTTCATGGCTG  
GTTTTTTTTCTTTTTTTTTTTTTTTTTTTGAAGACTACAGCAGGTATTACCCGGAGTAAAAAGGTTTTCTCA  
CACTAAAA

AAAAAACACATTTCTTAACAGATGGCTGAAAAATTTTTTTTTTTTTTTTTTTGGTTTTGCTTTGTATACACATG  
TATCTATTTTTTATAAAGATGAAATATATACGTCTAAGAGCTAAAATGAAAACTATACTAATCACTTATAT  
CTATTCTG

TTGTTACCCGACTTGTAGCTTCATTTTTTTCATTTTTTTTTTTTTTTTTTTTTATTTTTATTTTGTATTGTTCTT  
TGAAAGAATCATGCATGGAAGCAATAACTATTATACGGAAGTTATATACAAGAAATCATTATATAGTTACA  
GCATCATA

TACAATATTTTTGTTTGGATGCCAACACCGGCGTCTTGGTGTTCTTCTATAATATTTATTTTATTTATTTT  
TTATTTATATATGTACATATATATTCCTATTATCTATTAAGAAAGTAACTTAGTGTAATCTACCCTGT  
TCCAAGGC

ATGATAATGAAATCGATATTATGGAAGATATTAACCGCGCGCCGTATTAGTGTAACACTATATTAACCTACA  
TTTTGCTTCTTACTGAATTTATAAATTATGATTATATTATTACTATTATGACTACTGTATATATTTTTT  
TAGAATTA

GGGATCCGGCGTCACAAGCCACGGCCCCGTCCTCGCTGGTTTTTTAATTCTGGCTCCGCGTAGTACATT  
TTGTAGCTTGCCTTTTTTCCGGCTTCTAGAAAACCTGGAAAAACCATAAGAAAAAATGGGAAGGGGAAAA  
AAAAACCA

TATCTTATTGAAAAACACATTTCTTAACAGATGGCTGAAAAATTTTTTTTTTTTTTTTTTTGGTTTTGCTTTG  
TATACACATGTATCTATTTTTATAAAGATGAAATATATACGTCTAAGAGCTAAAATGAAAACTATACTAA  
TCACTTAT

GATGGCTGAAAAATTTTTTTTTTTTTTTTTTTGGTTTTGCTTTGTATACACATGTATCTATTTTTATAAAGATG  
AAATATATACGTCTAAGAGCTAAAATGAAAACTATACTAATCACTTATATCTATTCTGGTGATTCATCAT  
CTTCAGCT

GTGTTGAAACAAAAAATACAGTTGTTCTTTACGTGCATCGATCATATAAGAAAAGGGAAAAAAGCCGTAA  
AGTAAAAAATAAAGAGCTTCCATGGCTGGTTTTTTTTCTTTTTTTTTTTTTTTTTTTGAAGACTACAGCA  
GGTATTAC

TGGCATTAACTTTATTTGCCCACTTATATTTAGAGATCTTGAAATACTTTTTGTTACCCGACTTGTAGCTT  
CATTTTTTTCATTTTTTTTTTTTTTTTTTTTTATTTTTATTTTGTATTGTTCTTTGAAAGAATCATGCATGGAAG  
CAATAACT

AGAATATTGCGCTCGTGTAGTGTGAAACAAAAAATACAGTTGTTCTTTACGTGCATCGATCATATAAG  
AAAAGGGAAAAAAGCCGTAAAGTAAAAAATAAAGAGCTTCCATGGCTGGTTTTTTTTCTTTTTTTTTTT  
TTTTTTTTG

TATACTAAAAAACATTAATTTAATCAAAGAAAAATAAATTTAATGTATGTATCTATATATATATATATA  
TCACTTAAAAACAGACAATAGCCATAATCAACTGGGTATTATTATACAATATTAAGGAAGAACGCATATT  
TGAAAAAA

AAATTTTTTTTTTTTTTTTTTTGGTTTTGCTTTGTATACACATGTATCTATTTTTATAAAGATGAAATATATAC  
GTCTAAGAGCTAAAATGAAAACTATACTAATCACTTATATCTATTCTGGTGATTCATCATCTTCAGCTTC  
TGTATCCG

GAAGTGAAACGCGGGGACAACCATGATCTTTTTTGGAGTAGGATAATTTTTTATGTCGGTTTGATATATTAT  
AAAGCAAGTCATATATAATATCATACTGATTTTAAACCAAACGATAATCAATCAGAAAAAGAAAAATAAATA  
AAAATCTA

TTTGTTCCTCATTGGCGAAAAAAGTAAGTAGAAATAAATAAAAAATAATATTATAATGTGCTGTATA  
TATAAATACAAATGCGAAAGCTAATGCAGATTTTGCCTAGTACTCTCTAGAAATAGTAATGTCCCTTTCCA  
GCTCAACC

GATCATATAAGAAAAGGGAAAAAAGCCGTAAAGTAAAAAATAAAGAGCTTCCATGGCTGGTTTTTTTTTC  
TTTTTTTTTTTTTTTTTTGAAGACTACAGCAGGTATTACCCGGAGTGAAAAAGGTTTCTCACACTAAAATT  
TACGTGTT

GTTCTTTCCTCTGTGGTGGTCCAGTCTTTTGTCTCTTTTTTTTTTTTTCTTCTTTTTTTTTTTTTTTTTTT  
TTTGCAGCATTATGATAGAACAATAGGGCTCAAGATCGCACCAAGGCTAACAGTAACGGTATACGCAATCG  
TAGTGAAA

TTTAATTTTTATTTTTTTTCACTTGTATTTTTGACGGGCTATTAATTTTAAATGAAACTTTTCTACATGAT  
GGAACATAAACATAAATATAGGTATAGATAAATTGTTCTTCTTTTTTTTTTTTTTTTTTTCTTTAAGAGAAAGG  
TAAGTAAA

TTCTGTTTCCGAACCTCCTCATTTTTTCATGCATAAATATATAAATATATATATATATATAAAGCATAAC  
ATTTACAGTACCATGGGGTATATGATCCTCCATTACGTATTCTAAAGTTCGCGTTTTCTCACAATGCAAGT  
TTTTATAT

CTGTGGTGGTCCAGTCTTTTGTCTCTTTTTTTTTTTTTCTTCTTTTTTTTTTTTTTTTTTTTTTTTGCAGCAT  
TATGATAGAACAATAGGGCTCAAGATCGCACCAAGGCTAACAGTAACGGTATACGCAATCGTAGTGAAAGT  
GATTTTCA

TACCCTGTCATTCTAGTATTTTTTTTTTTTTTTTTTTGGTTTTACTTTTTTTCTTCTTGCCTTTTTTTTCTT  
GTTACTTTTTTTCTAGTTTTTTTTTCTTCCACTAAGCTTTTTCTTGATTTATCCTTGGGTTCTTCTTTCT  
ACTCCTTT

AAAAATATTTAAAATTGAGACCAAATAAAGATCCTGAATCATAATATATACGTGTGTACTTCACTTTCTATA  
GAGGAAAAAAGCTAAAAAATAAAGATGATAAAATAAACGAAAAAACCATAAAACGATCATGATAGA  
ATAATGTA

AAATCAAATTTTTTTTACTTTTTTTTTTGCTTTGCTATAGTATTTTAGAAAAGGACAAAAAATACGAAAA  
AAGACAAAAAACCATATAAAAAAATTGATTAGAAGAACTTATAATGGCATTGGCAAATTCAGACCTTTGC  
AAATACCA

CAATCAATCAATAACTACAGAAATATTGGGAGGTTTTAACTAATTTTTCCAGGATATTTCAACTTTTCATA  
AATCAAATTTTTTTTACTTTTTTTTTTGCTTTGCTATAGTATTTTAGAAAAGGACAAAAAATACGAAAA  
AGACAAAA

TTTATAAGAAATAGAGAGCTTTTAATTTTTATTTTTTTTTCACTTGTATTTTTGACGGGCTATTAATTTTAA  
ATGAAACTTTTCTACATGATGGAACATAAACATAAATATAGGTATAGATAAATTGTTCTTCTTTTTTTTTT  
TTTTTCTT

ATCGAACAAAGAAAAGCAAGAGCAGCAAGAGCAGGACAAAAAGAAAAAATCTAACCATTTAAAAACGGCGATA  
TATATTGGGCATAAACCTATATAAAATAACAGCAATAATAAAAAATGCAAAATATAACATAGCACGGTATA  
GTTAGCTC

GACATATCATGGTTGCCATGGGACACAAAAACGTAGCCACAAAAAATAAAGGTGAAAGGAAGCGAG  
CATTAATTTTTTATTTAATATGTAACGTGATATGTATTAACAAAGTATCTTTCATAATTTTTGACGAAT  
ATTTTTAC

AGGATATTTCAACTTTTCATAAATCAAATTTTTTTTTACTTTTTTTTTTGCTTTGCTATAGTATTTTAGAAA  
AGGACAAAAAATACGAAAAAAGACAAAAAACCATATAAAAAAATTGATTAGAAGAACTTATAATGGCATT  
GGCAAATT

GTTTAGTCAGCATCTACAAGCCCTATACCGAGGAAAGCGAATAGTCGCCATGCTAAACGCGCGGAACAAGG  
CCATATTTATATATTTAATGCTTTTTAACTATTATTAGTTTTTCTCACCCAGGGCTGGTTTTCTTACCCTGT  
GTGATGAA

GACCAACCCGATTTGTTAGGATCTTTTTCTTTATACTTTTTCCCTGCATAATCATCCACTTTTTTTTTTTTT  
TTTTTTAATTCATTTTCAAGATTTTAGACGTTGTATAATACATTTTTTACCCACTACTGCGGTTTATTGTAA  
TATTTTGT

TGATGTGTTCAATTTTTTTATTGATAAAAAATAGGGGAAAGTGTCTATATATTTTGCGTATAAAATTCTCTAC  
ATTTTTTTTTCTTTGTTTAGTATGTGTATTGAAACATTTTATTTATAGGTTAGAGAAACAAAAAATAA  
ACTGCAAT

TAATTTTTCCAGGATATTTCAACTTTTCATAAATCAAATTTTTTTTTACTTTTTTTTTTGCTTTGCTATAGT  
ATTTTAGAAAAGGACAAAAAATACGAAAAAAGACAAAAAACCATATAAAAAAATTGATTAGAAGAACTTA  
TAATGGCA

TCTGTTTTCTTTTTTTTTTTTTTTTTTTTTTTTCAAGTTCACGAAAAAATTTCTCGTTTTCTTTAGTCA  
CTCTTGTACATAAGGATTATCCGAACCCCGCCCGGAATTAATTAGTTGGCTAGATTATGCTTGGTA  
GAATGAAT

TAATCAAAGAAAAATAAATTTAATGTATGTATCTATATATATATATATATATCACTTAAAAACAGACAATAG  
CCATAATCAACTGGGTTATTATTATACAATATTAAGGAAGAACGCATATTTGAAAAAATAAATGGG  
TAATGAAT

TATTAAGGAAGAACGCATATTTGAAAAAATAAATGGGTAATGAATTTTAGCACAAATACTTCACAA  
AAGGAAATATACTAGTAGTAAATGTATATATTTATATGTTTATACAATGAATGGTACAAGAAATTTTGATA  
TTCTTGCT

CTGAAGTGTGTGGTCGGTAAAACAACAGCGTAGATGCTTTTTAAAAAATTGTAGTATCACAGTTATATGTA  
TAGCAAAGAAAAAGAGTCGCTCTAAAAAATAAAAAAATACTCCATAAAAAACAACAAAAAGAGACGGACGCG  
GTTAACGA

ATATTAACCTTTCAACACATTTTGTGTTTTGTTTTATTTTTGTTTTTTTTATTTTTTTTTTTTTTTTTTCGCGTT  
TCGTGCTTTAATGAAACATGTGAAGTGTTCGCAATGACTAAGTAGCCTCCACAGATGATCAGCAGGTATT  
GTACTTTA

AGTTGGTATATGCTGCACGTGTAGTCTAATGTTCTTTTCTTTTTTTTTCTTTATTCTTTTTTCTCCTCTTTA  
TGAATACAGATATTCAATTTTTTGAATATCTGATTGTTTTTATTTTCATTTCAATTTTTTTTTTTTTTCAA  
TTTTTTTT

TTCTTTTATAATCCTTAATATTCTATATATACATATATGAAAAATAGAAAACGCGAAAACCTTGTCAATTT  
TTTTTTAGGCGTTTTTATAATATACTGAAAATAAAAAGAGGCTCTTTAAATGTTGACACTCTACTCCAATA  
TCAACTGT

TATAATTATATGAGTTTTGAAAAAAGTACTGGGCATCATTTAAATAAGCGGGCTAAACTTTGTTTATGTT  
TAGGTTAACGATAGACATATTTATTTTTTTTTCTAGGAATAAAAATGAAGAACGGGAAGAAAAGGAAAAAT  
GAAAATGA

GCAGAATATAAACTTTAAATGAAAATAGATAATATTTATATATATTAACGTTATTACAATTATTTTTTATC  
ATCTAGTACATCTCTGCGCATTTTTCTCTTCTATATACAGCTTAATATGTGCGAAAACGCGAAGCAAGAAAAG  
AAAAGAAA

CACTTATATTTAGAGATCTTGAAATACTTTTTGTTACCCGACTTGTAGCTTCATTTTTTCTTTTTTTTTTT  
TTTTTTTTATTTTTATTTTGTATTGTTCTTTGAAAGAATCATGCATGGAAGCAATAACTATTATACGGAAG  
TTATATAC

TTGACAAAAAATGAAAACCACTATTATTTAAATTACGGAAAAAATAACCAATAAACAAAAACATAAT  
AAAAGAAATGAAAAAAGAATATTAGTAGAGCATACTGAATTGTTTTTCAGAAAGAGAGTGAAAGGTAACA  
AAAATTTA

ACACTGCCTCCCAAATTTTAAATTTGAGGGCAGAATATAAACTTTAAATGAAAATAGATAATATTTATAT  
ATATTAACGTTATTACAATTATTTTTTATCATCTAGTACATCTCTGCGCATTTTTCTCTTCTATATACAGC  
TTAATATG

CCAATACCCGCGGGCAGTAACCGCATCTTTGGAAATACCGGGTAATAATAAATGCCCGGGAAAAAAGAGCA  
TAAAACAGAGAGGCGATATAGGAATGAATATGTGCTATTTACGGAAGGGAAAAACACTTATTGTTTTTCTG  
AAATGTGA

ACTAGTTATTGTACTTCCCGCCTTTGCTAAAGACGCGTAAGAAAAAAGTACAAATAATGCCCTATAAAG  
AAAAAATTTAAATAAACGCGAAGTATTGTTTGGACGTAATACTTCTCCTTCTCGGGCCGGATATTCGTAT  
AGCTCGTA

CCATGCGCGTTGATTGATGTGTGATATATATATATATATATATATATATATATATATATATATATATAT  
AGGTGATTTTATCTTTGTACGCGTACCATTTTTGTAAAGTGACCTTGTTTTGACTTTTTAACGAGTAAAAA  
AACGAGTT

AGAAAAATCTAACCATTAACCGGCGATATATATTGGGCATAAAACCTATATAAAATAACAGCAATAAT  
AAAAATGCAAAATATAACATAGCACGGTATAGTTAGCTCATATATGTTTTAACGAGCCTTACATTATATCA  
TTTAATAC

CAAACCTTTTTTAACTCCAGAAAAGAAATTTCTTTATTTTCAAAAAATTTCTCCCACTTTTTAATGTAATT  
TTTTCTTTATATAATATATATATATATATATACATGAGTATCAATACAATATAACCTAATCTAGCTTTTTTATCC  
AATGGACT

TAAAAAAAAAAAAAGAGTAAGAAATTAACGTTACCACCTATGGGAAAGGCAGTAACTCACAAGCATTACGT  
ACATAATTCTGTTTTTTTTTTTTTTTTTATTTCATTTCTAGCACGCTATCGGGTTATTTTTTTTTTTGTAATAT  
ATAGTGAT

TTAAAATAAATATGTATAGCAGAATTATAAGAGGCGAAATCGATCAATTAGTTGAACAATTAACCTAAAAAT  
CTAATATATATAAATATATATATATATATATATAGGAAATATACGGCACGTTATACTAGAGATATTAACA  
TCCCAACT

TTTCACATGTTTTAGTGAAAAATACTGAACAATGAAATTTCAATATCGCATATAATAATTTTTGTTATCA  
AATATATATTTTTCGGAAGTCATATACATTAATAATTA AACATTATTTTTAAAAATTA AAAAAATATAT  
TTTAGCAA

TAGCAACTAGTTTAGCACAACATCCAACCAAGAGGTTTCTCGCGTATTTCTCTCATTTTTTTTACCCATTT  
TACAAATTTTTTTGCTATTTGAGCCATAGTACCCATTAATAGGTCTCGTCCATTCCCTTGTTTTTTTTT  
ATTGTTTC

ATCGCGAACAACGGTATTCGGGTAACAGCCTATCACTATTTTTACCGCGGCTATTTTTCTAAACCTAGT  
ATATATACGCGAAAATTGGCTACCTGCAAAATTC CAATAGTGGCGAATGTATTGGAATTAATCTGCAAGGA  
AAATAAGC

CCCTATACCGAGGAAAGCGAATAGTCGCCATGCTAAACGCGCGGAACAAGGCCATATTTATATATTTAATG  
CTTTTAACTATTATTAGTTTTTCTCACCCAGGGCTGGTTTTCTTTACCCTGTGTGATGAAAGTGC GCGCCTA  
AAGTTATG

CATTTCAAATATATGTACTTTAAAGAAAATAAAAATAAAAAATAAAATTTTTTTCTCCGATAATCAATTTT  
CTTAATTAATTAATTGCGTTACGATTCCGTTTTTTTTACTTCTTTTATCTCATTATCTATCTAAGTTATTTA  
AAAAAAG

GTATAAACAAAGCCAAAGACAAGTTCGCACTCCATCAAGTGAACCTCAACAGCTACACATTCTTTTATAA  
TCCTTAATATTCTATATATACATATATGAAAAAATAGAAAACGCGAAAACCTTGTCATTTTTTTTTTTAGGCG  
TTTTTATA

CCTCTAAAAA AAAAAAAAAA AACTCCATAAAAAACA AAAAAAGAGACGGACGCGGTTAACGAAGTAGTAACTT  
GATGAAAATGAATAAAAAAGAATAAAATTAACAAATAGAAAAGTTGAATCTTTTAAACTCAAAGTCGCCA  
TCGATCAA

CAGTTTTTTCGTTTCATCATCATCATCGTATTATTATTATTGTTATTATTATTATTATCATTACTTTTTATTA  
ATATTAACTATTTTTTTAGTATGATTTTCGGGTATATTTATTTTAATTAGATACTTTTAAACCGTTTCAAACA  
ATTAAGG

GGTGAAAGAAGATGCGCGTTTTATGGGGAGAAAACCCGTAGAAAACGCGAAAAGCCGCTGAAAATACAAAGG  
GAAAAGCCGCTCTCATTTCCTATTTTAGGAAAAGAAATGAGCGGGGTAAACGGAGATCGCTGCGGACGGAA  
GGCGCGAA

CATCCCACTTTTTTTTTTTTTTTTTTTTAAATTCATTTTCAAGATTTTAGACGTTGTATAATACATTTTTACC  
CACTACTGCGGTTTATTGTAATATTTTGTGAGATTTTATGAATGCGTTCCATCATCTATTTACTACAAAAC  
GATAAATT

AAAACCACGTGAAAAAAAAAAAAAAAAAAAAAAAAAAAAAGAAAAAGAAAAGGGCAGCTGCCAACTAGTAC  
ACACTACACAGATATTTATGAAAAACACTA ACTTCTCCTTTTGGAAGTGTGACGTACCTTCCCTTACCAA  
TGCGGACG

TGAAATTTAGCTTTTTTTTTTATTTAGGAGAAACAATATATATATATATATGTATATACGTATGTATGATTCATA  
TTTTAATCGCATTTTTTATTTTATCTAAAACAATTACTTTTTTGATTATTTATAGAAAAAACAACAATG  
ATACGTTT



ACGAAGTTAAAAAAAAAAAAACAAGAAAAAGAAACAAGATCAAAAGAAACGATAAAGGCTGGCTTATAAAAATA  
ATAGCATCGCGAACGATCAATAAGGGGCCCTGTTTATTTTTAACAAGTTTACATATTTTCGTTTTCTCTCT  
TAAGCTGA

GTTATATTTCCACATGTCATCATTTTCAAATATATGTACTTTAAAGAAAATAAAAATAAAAATTTTT  
TTCTCCCGATAATCAATTTTCTTAATTAATTAATTGCGTTACGATTCCGTTTTTTTTACTTCTTTTATCTCA  
TTATCTAT

AGGAATAAAATTAGAATTTTTTTTTGAATAATACGAAATAGAAAAGAAAAGGTATGAAAAGTGCGCATCAC  
GATTTATCATCCTTCTTTAGTGGGGATTTTTTTTTTTTTTATCTTTTTGTATGTTTTTCCAACCTTTTTTT  
TTTTTTGT

ACTGCATGGTTTTCTAGCTCTTTTTCACTTTTTTGAGGTTTTATTTATCTTGTATTCTTTTTTTCTATTAT  
TTTAAAGTTCAATTTCTATCGACGGTTTTTTTTAATTATATATATATATATATATATATATATATATATAT  
AATGTGTA

GGTATTAATACCTGTACATTTGAATATTTGGAATGAGAAAGAAATATAGTTACATAATGTACAAAAAGA  
AGCAAGAAAGGAATATATATATATATATATATATATATATATATATATATATATATATATATATATATAT  
CTCTTCGA

GGCCACTGCATCGCCTTTCCTGCCCATTTGATTCAAATGTCCATGCGCGTTGATTGATGTGTGATATATAT  
ATATATATATATATATATATAGATGTATATTATTATGTTTCCAGAGGTGATTTTATCTTTGTACGCGTACCATT  
TTGTAAAG

GAATACATCATATAATACGAATGACACAGGGGCACCCACCCATCGCATATCAGGAGAACTTCCCTGTGCAT  
ACGGGACAGCAGAGATAGGCTGTTCTCGCGCGTTTTTTTTTTTTTTTTTTGCTTTTTTTGGTTCCTTTCGCG  
ATATCGTA

GCTCGTGTAGTGTGAAACAAAAAATACAGTTGTTCTTTACGTGCATCGATCATATAAGAAAAGGGAAA  
AAAGCCGTAAAGTAAAAAATAAAGAGCTTTCATGGCTGGTTTTTTTTTTCTTTTTTTTTTTTTTTTTTTGAA  
GACTACAG

TCTTTATTTTCAAAAAATTTCTCCCCACTTTTAAATGTAATTTTTCTTTATATAATATATATATATATATAC  
ATGAGTATCAATACAATATAACCTAATCTAGCTTTTTTATCCAATGGACTTGACTATCATCAGTACTAGAAA  
GTGTCATT

TGGTCCGTAAAACAACAGCGTAGATGCTTTTTAAAAAATTTGTAGTATCACAGTTATATGTATAGCAAAGAA  
AAAGAGTCGCCTCTAAAAAATAAAAAAATCCATAAAAAACAACAAAAAGAGACGGACGCGTTAACGAAG  
TAGTAACT

ATTATAATTCATCTATAGGGCATATACAAAAAAGGTAGGTGTAAGATAATAAATACAACCCTAT  
TAGCTTTGATAAAAAATTAGTAGGGTTAGAATGTCATATGGTAGGGTGATATAAACGCGTGAACCTTACGC  
GTTTATAT

GTCCTTGCAAAAAATATTTAAATTTGAGACCAAATAAAGATCCTGAATCATAATATATACGTGTGTACTTC  
ACTTTCTATAGAGGAAAAAAGCTAAAAAATAAAAAAATGATAAAATAAACGAAAAAACCATAAAAACGA  
TCATGATA

CCAAATTTTAAATTTGAGGGCAGAATATAAACTTTAAATGAAAATAGATAATATTTATATATATTAACGT  
TATTACAATTTTTTTTATCATCTAGTACATCTCTGCGCATTTTTTCTTCTATATACAGCTTAATATGTC  
GAAAACGC

TCTCCTCTTTATGAATACAGATATTCAATTTTTTTGAATATCTGATTGTTTTTATTTTCATTTCAATTTTT  
TTTTTTTTCAATTTTTTTTTATCCGATCGTTGCGCCAAGCTTCTATCGTTAAAACAATGACACTTCGCTGT  
GAAATGAC

CTTCCTGTTTTTTCATGGCAATAATTTTGACTAGTTTTTCTTTTTTTTTTTTTTTTTTTTTCATTCTTTTTTCAT  
TATTACTTAAGTTCTGTAAAGATATATGGAAGAGAAAATAAAAAGAATAAAACCAAAGATAGTGGTACAAC  
TGACGTTA

CTGAAGTTGAAGTTGTACAAAAATAGTGACTTTAATTCGGAAAAATAAAAAAAAAAAAAAAAAACATAAGGA  
AATTTTAATTAATAGTCTATCTACACATTTCTTAAAGAAAATATTATTGCATTACTTTTTTTGAAGATCT  
ATAAAGGG

CTATCATTTTTTCTCGCCGTTTCTAGTAGAAAAGGGCAACTTTTACTTAAAAATCATAACAATTGACTTACT  
TTTTTTTTTTTTTACACAGATACCTTTTTTATTTTGAAGTACGCGCAGTTTGAAAGAGGAAGAGATAATCCTAT  
GATTACTC

GTAaaaaaATTTTTTTTTTGGAGGTTTTTGCTTCCATTTCTTTAGACTGAACTAATTTATTTTTTTTTATTAT  
TATTCAGTAATTTTTATATATTTATTTATGGACTTATTGAGGTGCTTTGGGGGTGATGACGTCCCCAGTGA  
GGCCCCCA

GTGTGTACTTCACTTTCTATAGAGGAAAAAAGCTAAAAAAAAAAAAAAAAATGATAAAATAAACGAAAAAAA  
CCATAAACGATCATGATAGAATAATGTACATTATTAAGAATGCTTCATTGATGACATGCAGTGCGAAAAAG  
AAAGGAAC

GATGCGCGTTTATGGGGAGAAAACCCGTAGAAAACGCGAAAAGCCGCTGAAAATACAAAGGGAAAAAGCCG  
CTCTCATTTCCTATTTTAGGAAAAGAAATGAGCGGGGTAAACGGAGATCGCTGCGGACGGAAGGCGCGAAAT  
ACCCACTG

CATAGTCTTCGTAAAAAATTTTTTTTTTGGAGGTTTTTGCTTCCATTTCTTTAGACTGAACTAATTTATTT  
TTTTTATTATTATTTCAGTAATTTTTATATATTTATTTATGGACTTATTGAGGTGCTTTGGGGGTGATGACG  
TCCCCAGT

TTGGTTTTATGAGTTTTTACCCCGTTCTTTACCACATTGTTTTCTAATTATTCCGTTAGCGCCGCTTACTT  
TTAATGTTCTTAAGATAAAAAAACATCATTAATATTATTATTAATAAATTCATATATATACCTATATCTAT  
ATGCACTA

AACAGAAATAGAAAAAGTTGTATATAACAAGCCAAAAAAGAAAAAAGAAAAAAGAAAAAAGAAAAACACA  
GCTTATTTCAAATTGCAATCTGCGTATTTGTAAGTAACGAATGATCTCACAGCATTGCTTTTTTTTTTTTT  
TTATATAT

ATTTGTTAGGATCTTTTTCTTTATACTTTTCCCTGCATAATCATCCACTTTTTTTTTTTTTTTTTTTAATT  
CATTTTCAAGATTTTAGACGTTGTATAATACATTTTTTACCCACTACTGCGGTTTATTGTAATATTTTGTGA  
GATTTTAT

AAGAAAGTAGTTGACAAAAAATGAAAACCACTATTATTTAAATTACGGAATAAATAAATAAATAAATAAATAA  
AAAACATAATAAAGAAATGAAAAAAGAATATTAGTAGAGCATACTGAATTGTTTTTCAGAAAGAGAGTG  
AAAGGTAA

AAAATTTCTTATCATGGTAGTGATCACAAATAGATCACATGATATATTTTTTATTTTTAATTTTTTTTTAAT  
TATAAAAATAAATTTTTCTTTAAATTAACAATAAATAAATAAATAAATAAATAAATAAATAAATAAATAAATAA  
AATAGAAA

TCACGTGTGCAGCATAGTGTGGTATATTGTTTTTTTATATTTTATTTTTTATTTTTTTTTTTTTTGCAGAAA  
ACAGTGTGTATTATATGCTTTAGATATGCTAAAAAATGAAAAAATGGAACAAAATATGTGTTTTT  
TTATTTAA

GTTTCATATTTTACGTGTGCAGCATAGTGTGGTATATTGTTTTTTTATATTTTATTTTTTATTTTTTTTTT  
TTTGCAGAAAACAGTGTGTATTATATGCTTTAGATATGCTAAAAAATGAAAAAATGGAACAAAAT  
ATGTGTTT

TGACGTACAAGTTCATCATTTCACGTGTGCAGCATAGTGTGGTATATTGTTTTTTTTATATTTTTATTTTTTA  
TTTTTTTTTTTTTTGCAGAAAACAGTGTGGTATTATATGCTTTAGATATGCTAAAAAAAATGAAAAAAAT  
GGAACAAA

AGCATAGTGTGGTATATTGTTTTTTTTATATTTTTATTTTTATTTTTTTTTTTTTTTTTTTTTTTTTTTGCAGAAAACAGTGTGG  
TATTATATGCTTTAGATATGCTAAAAAAAATGAAAAAAAATGGAACAAAATATGTGTTTTTTTTATTTAACG  
TTAAAATT

TTTTTTATATTTTTATTTTTATTTTTTTTTTTTTTTTTTTTTTTTTTTGCAGAAAACAGTGTGGTATTATATGCTTTAGATATG  
CTAAAAAAAATGAAAAAAAATGGAACAAAATATGTGTTTTTTTTATTTAACGTTAAAATTAAAGATTAAGTT  
ATTTATTC

GGTATATTGTTTTTTTTATATTTTTATTTTTATTTTTTTTTTTTTTTTTTTTTTTTTTTGCAGAAAACAGTGTGGTATTATATGCT  
TTTAGATATGCTAAAAAAAATGAAAAAAAATGGAACAAAATATGTGTTTTTTTTATTTAACGTTAAAATTAA  
AGATTAAG

TTTTTATGTTACCCGTCCAACGTTCTCACCCGGCTCCGCGCTATTTTTTTTTTTTTTTTTTTTTTTTTTTTTTTTTTTCA  
GACCCACACAAAATCCGCGTAGCCGAGATTGCTTATGTATGTTATCATATTGCCTGTTTGAGATATGCAGG  
ATCAGCAT

TTTATTTTTTTATTTTTTTTTTTTTTTTTTTTTTTTTTTGCAGAAAACAGTGTGGTATTATATGCTTTAGATATGCTAAAAAAA  
TGAAAAAAAATGGAACAAAATATGTGTTTTTTTTATTTAACGTTAAAATTAAAGATTAAGTTATTTATTTCGA  
CGTCAGCA

ATCATGGTAGTGATCACAAATAGATCACATGATATATTTTTTTATTTTTTAATTTTTTTTTTAATTATAAAAAATA  
ATTTTTTTCTTTAAATTAACAAAAATAAAAAATTGTTTTTTGTTGGTTAAGATTTCCGAAAATAGAAATA  
TTATTCAG

TTTTTTCAACGGCCGCTCCTTAAAGACCATCCGCATGCTAGAATTATATACTAATATGATTTTTGTAAAGAT  
AGGAATATTATAATTATAATTATATTTAATTTAATAAGAAAAGAAACGAAAAAAAAAAAAAAAAAATGGAATT  
AAAAAGTT

TGCACGTGGCTGCAGACACATTTTGTATGGAGGGAATGCTTGATTATATAAAGAGCTCTGTTTTTATGTTA  
CCCGTCCAACGTTCTCACCCGGCTCCGCGCTATTTTTTTTTTTTTTTTTTTTTTTTTTTTTTTTTTTTTCAGACCCACACAA  
AATCCGCG

TTTTGTATGGAGGGAATGCTTGATTATATAAAGAGCTCTGTTTTTATGTTACCCGTCCAACGTTCTCACCC  
GGCTCCGCGCTATTTTTTTTTTTTTTTTTTTTTTTTTTTTTTTTTTTTTCAGACCCACACAAAATCCGCGTAGCCGAGATTG  
CTTATGTA

TAGATCACATGATATATTTTTTTATTTTTTAATTTTTTTTTTAATTATAAAAAATAATTTTTTTCTTTAAATTA  
CAAAAATAAAAAATTGTTTTTTGTTGGTTAAGATTTCCGAAAATAGAAATATTATTCAGTTGAAAGACAAA  
AAACATA

TCTTAAAAGAATTTTTTTTTTTTTTTTTTCTGTCCTCCTAATATCTTTTATCTTTAATACTGTAGGGGCGCAAG  
TTTCTTTTTTTTTTTTTTTTTATGTTGCGTTTAGTTTTTCTCTTGGCAAAGTTTTTTCGCACCCCGATCTT  
TTTTTGCA

GATATATTTTTTTATTTTTTAATTTTTTTTTTAATTATAAAAAATAATTTTTTTCTTTAAATTAACAAAAATA  
AAATTGTTTTTTGTTGGTTAAGATTTCCGAAAATAGAAATATTATTCAGTTGAAAGACAAAAAACATAAA  
TATTTCTA

ATTTCCAGAAGAAAGTGACATCGATGAATGCACTCAAGAGATTTTTATGTGTTGTGAATATGTATATATTTA  
TTTAGAAAAAAAACAAAATCATATACCTTAGGCATCCCGTTCCCTCTTCATCATT  
TTGTCCCT

ACCCGTCCAACGTTCTCACCCGGCTCCGCGCTATTTTTTTTTTTTTTTTTTTTTTTTTTTTTTTTTTTTTCAGACCCACACA  
AAATCCGCGTAGCCGAGATTGCTTATGTATGTTATCATATTGCCTGTTTGAGATATGCAGGATCAGCATAG  
CATGTCTC

TGCAGACACATTTTGTATGGAGGGAATGCTTGATTATATAAAGAGCTCTGTTTTTATGTTACCCGTCCAAC  
GTTCTCACCCGGCTCCGCGCTATTTTTTTTTTTTTTTTTTTTTTTTTTTTTTTTTTTTTCAGACCCACACAAAATCCGCGTA  
GCCGAGAT

AAGAGCTCTGTTTTTATGTTACCCGTCCAACGTTCTCACCCGGCTCCGCGCTATTTTTTTTTTTTTTTTTTTTT  
TTTTTTTTTTCAGACCCACACAAAATCCGCGTAGCCGAGATTGCTTATGTATGTTATCATATTGCCTGTTTGA  
GATATGCA

TTTTGACATGTTTTTTCAACGGCCGCTCCTTAAAGACCATCCGCATGCTAGAATTATATACTAATATGATT  
TTGTAAAGATAGGAATATTATAATTATAATTATATTTAATTTAATAAGAAAAGAAACGAAAAAAAAAAAAAA  
AAATGGAA

TGATCACAAATAGATCACATGATATATTTTTTATTTTTAATTTTTTTTTAATTATAAAAATAATTTTTTTCT  
TTAAATTAACAATAAAAAATTTGTTTTTTGTTGGTTAAGATTTCCGAAAATAGAAATATTATTCAGTT  
GAAAGACA

GTGTCTTGCCTAGACAATCTAAAAAAGGCTGCACACCCATGCATCATTCTAAAAAAATTATTTTTTTTTCTT  
TTCATTTACTTTTTCGTTTTTTTTTTTTTTTTTTTTTTTTTTCAGTTTCGATTTCTTGGTCGGACGCGATGGCAAATTT  
TCATCGAG

ACCATAGATTTCTTAAAAGAATTTTTTTTTTTTTTTTTCTGTCCTCCTAATATCTTTTATCTTTAATACTGTA  
GGGGCGCAAGTTTCTTTTTTTTTTTTTTTTTTATGTTGCGTTTAGTTTTTCTTGGCAAAGTTTTTCGCA  
CCCCGATC

CAATTTATATCTGAGAAAGATTCTACACACAGATATATATATATATATATATATTATTGTATATATACATA  
CCTACATTATTTTTAAAGGCTTGCATGATGCTGTTATGTAAAAAATAAAAAAATCAGTGTAACATAA  
TAGACGTA

AAAAAAGGCTGCACACCCATGCATCATTCTAAAAAAATTATTTTTTTTTCTTTTCATTTACTTTTTCGTTTTT  
TTTTTTTTTTTTTTTTTTCAGTTTCGATTTCTTGGTCGGACGCGATGGCAAATTTTTTCATCGAGAGATTATCGTTA  
TAAAGGCC

CCGCATGCTAGAATTATATACTAATATGATTTTTGTAAAGATAGGAATATTATAATTATAATTATATTTAAT  
TTAATAAGAAAAGAAACGAAAAAAAAAAAAAATGGAATTA AAAAGTTTTGCCGTACATAAAATATTGAA  
AAGACTTT

TGATTATATAAAGAGCTCTGTTTTTATGTTACCCGTCCAACGTTCTCACCCGGCTCCGCGCTATTTTTTTTT  
TTTTTTTTTTTTTTTTTTTTCAGACCCACACAAAATCCGCGTAGCCGAGATTGCTTATGTATGTTATCATATT  
GCCTGTTT

GAAAGTGACATCGATGAATGCACTCAAGAGATTTTATGTGTTGTGAATATGTATATATTTATTTAGAAAAA  
AAAAAAAAAAAAAAAAACCAAATCATATACCTTAGGCATCCCGTTTCCCTCTTCATCATTTTTTGTCCCTTT  
ATATCAAT

TGACTGATATAAAATTTCTTATCATGGTAGTGATCACAAATAGATCACATGATATATTTTTTATTTTTAAT  
TTTTTTAATTATAAAAATAATTTTTTTCTTTAAATTAACAATAAAAAATTTGTTTTTTGTTGGTTAA  
GATTTCCG

ATTTTTTTTTTTTTTGCAGAAAACAGTGTGTTGATTATATGCTTTAGATATGCTAAAAAAATGAAAAAAA  
TGGAACAAAATATGTGTTTTTTTATTTAACGTTAAATTAAGATTAAGTTATTTATTCGACGTCAGCATC  
AAAAGTTT

ATTTTTTTTTTTTTTTTTCTGTCCTCCTAATATCTTTTATCTTTAATACTGTAGGGGCGCAAGTTTCTTTTTT  
TTTTTTTTTTTTTATGTTGCGTTTAGTTTTTCTCTTGGCAAAAGTTTTTTCGCACCCCGATCTTTTTTGCATA  
CGTAGTTC

CGTACCTCAGTAGAATCAATCAATTTATATCTGAGAAAGATTCTACACACAGATATATATATATATATATA  
TATTATTGTATATATACATACCTACATTATTTTTAAAGGCTTGCATGATGCTGTTATGTAAAAAAAAAAAA  
AAAAATC

ATTTTCAGCATTGGGGGCGGGTTGAGTATAGATACGAGAAGCGCCTATTTTCGTATGAGGTTTTTTTTTTCT  
ATTATTATGTATATTAGGCATATATATACATATATATATTTTTGCATACATATTCATTTTTAAAAAATGCA  
ACTGCTAC

TAGACAATCTAAAAAAGGCTGCACACCCATGCATCATTCTAAAAAATTATTTTTTTCTTTTCATTTACT  
TTTCGTTTTTTTTTTTTTTTTTTTTTTCAGTTCGATTTCTTGGTCGGACGCGATGGCAAATTTTTCATCGAGAG  
ATTATCGT

GGCCGCTCCTTAAAGACCATCCGCATGCTAGAAATTATATACTAATATGATTTTTGTAAAGATAGGAATATTA  
TAATTATAATTATATTTAATTTAATAAGAAAAGAAACGAAAAAAAAAAAAAAAAAATGGAATTA AAAAGTTTT  
GCCGTACA

TCTATCTAAACAGTGGTCAATGGATTCTTCGAGAGCTAAGACCATAGATTTCTTAAAAGAATTTTTTTTTT  
TTTTTCTGTCCTCCTAATATCTTTTATCTTTAATACTGTAGGGGCGCAAGTTTCTTTTTTTTTTTTTTTTT  
ATGTTGCG

TAGAATCAATCAATTTATATCTGAGAAAGATTCTACACACAGATATATATATATATATATATATATTATTGTA  
TATATACATACCTACATTATTTTTAAAGGCTTGCATGATGCTGTTATGTAAAAAAAAAAAAAAAAAATCAG  
TGTAACAT

GAGAGCTAAGACCATAGATTTCTTAAAAGAATTTTTTTTTTTTTTTTTCTGTCCTCCTAATATCTTTTATCTT  
TAATACTGTAGGGGCGCAAGTTTCTTTTTTTTTTTTTTTTTTATGTTGCGTTTAGTTTTTCTCTTGGCAAAA  
GTTTTTTCG

TAAAGACCATCCGCATGCTAGAAATTATATACTAATATGATTTTTGTAAAGATAGGAATATTATAATTATAAT  
TATATTTAATTTAATAAGAAAAGAAACGAAAAAAAAAAAAAAAAAATGGAATTA AAAAGTTTTGCCGTACATA  
AAATATTG

CACAAAGTGGTGACGTACAAGTTCATCATTTCACGTGTGCAGCATAGTGTGGTATATTGTTTTTTTATATT  
TTATTTTTTATTTTTTTTTTTTTTTTGCAGAAAACAGTGTGTATTATATGCTTTAGATATGCTAAAAAAAT  
GAAAAAA

TCGATGAATGCACTCAAGAGATTTTATGTGTTGTGAATATGTATATATTTATTTAGAAAAAAAAAAAAAAAA  
AAAAAACCAAATCATATACCTTAGGCATCCCGTTCCCTCTTCATCATTTTTTGTCCCTTTATATCAATTT  
TTTTAGAC

AGGGAATGCTTGATTATATAAAGAGCTCTGTTTTTATGTTACCCGTCCAACGTTCTCACCCGGCTCCGCGC  
TATTTTTTTTTTTTTTTTTTTTTTTTTTTTTCAGACCCACACAAAATCCGCGTAGCCGAGATTGCTTATGTATG  
TTATCATA

GATACGAGAAGCGCCTATTTTCGTATGAGGTTTTTTTTTTCTATTATTATGTATATTAGGCATATATATACA  
TATATATATTTTGCATACATATTCATTTTTAAAAAATGCAACTGCTACACGCTTTGAAAGATTCAATGAA  
AAGTTTTT

GCACACCCATGCATCATTCTAAAAAATTATTTTTTTCTTTTCATTTACTTTTCGTTTTTTTTTTTTTTTT  
TTTTTCAGTTCGATTTCTTGGTCGGACGCGATGGCAAATTTTTCATCGAGAGATTATCGTTATAAAGGCCTG  
TTGATTTT

CTTCTCATTTCATTTCTTTTAAAATTATTTTCAGTATAGTTATTATAATTAACATTGGAATAACATTAAT  
AATAATAATTTTTTAATAGTAATAATGATAATAATAATAATAAAAAATAAAGAATAAATTTAAAAACAAA  
AAAATTCT

CGTTCTCACCCGGCTCCGCGCTATTTTTTTTTTTTTTTTTTTTTTTTTTTTTTTTCAGACCCACACAAAATCCGCGT  
AGCCGAGATTGCTTATGTATGTTATCATATTGCCTGTTTGAGATATGCAGGATCAGCATAGCATGTCTCTA  
ACCAAATT

CAGGTGAAATGTGTCTTGCCTAGACAATCTAAAAAAGGCTGCACACCCATGCATCATTCTAAAAAAATTAT  
TTTTTTCTTTTCATTTACTTTTCGTTTTTTTTTTTTTTTTTTTTTTTCAGTTCGATTTCTTGGTCGGACGCGAT  
GGCAAATT

AAAAAAATTATTTTTTTCTTTTCATTTACTTTTCGTTTTTTTTTTTTTTTTTTTTTTTCAGTTCGATTTCTTGG  
TCGGACGCGATGGCAAATTTTTCATCGAGAGATTATCGTTATAAAGGCCTGTTGATTTTCAAAGAGATAGA  
AATCTTCT

ACAGTGAAATTGATCTCAGGATCATTAGTAATTTTTCTCACTATAAGAAAAAAAAAAAAACATATATTTTTG  
CTATGAATTATAATAAGTAAATATATACATATATATGTACAGAGAACTGACGAAGAAAAATAAATCACCCG  
TTAATGCT

ATACCTTGATGGCTGAACAGTAGTCAGAAAATTAAAAAAAAAAAAAAAAAAGCGCTTATTACGGCGTATACACG  
TAACTATATAGACGTAGATCATTGAATATTGATATGATATAATATTTTCCCGGGATTGCAGAATACTGAC  
ACGCCTTT

GAATTATATACTAATATGATTTTGTAAAGATAGGAATATTATAATTATAATTATATTTAATTTAATAAGAA  
AAGAAACGAAAAAAAAAAAAAAAAAATGGAATTAAGTTTGGCCGTACATAAAAATATTGAAAAGACTTTTA  
CATTAATG

TTTTTTTATAGTACTTTTTTTGTGACATCAAAATGAAGCACTAAATAATTATAGAAAATATTCAGCAAA  
AAAAAGAAAAACCTTCTTCTGAAAAAAAAAAAAAAAAAATTCAAAAAAGACACCTTTCTACCTTGGCAG  
TAAATTTT

AATCGCATTCTCTATCTAAACAGTGGTCAATGGATTCTTCGAGAGCTAAGACCATAGATTTCTTAAAAGAA  
TTTTTTTTTTTTTTTTCTGTCTCCTAATATCTTTTATCTTTAATACTGTAGGGGCGCAAGTTTCTTTTTTT  
TTTTTTTT

GGCTGAACAGTAGTCAGAAAATTAAAAAAAAAAAAAAAAAAGCGCTTATTACGGCGTATACACGTAACATATA  
GACGTAGATCATTGAATATTGATATGATATAATATTTTCCCGGGATTGCAGAATACTGACACGCCTTTTA  
TTTATCGT

TGAAAAATAGAAAGAAAAATACCCATTTTTTCAAGGAAAATAAAATTTATATATTACATACATTTCTATA  
AAACAGTTTAAATTCAAAAATATAAACAAAAACATAAAAAATAAGAAAAGTTCAAGTCTTCGTTATTTTCTG  
TTTGTGGA

GTTGAGTATAGATACGAGAAGCGCTATTTTCGTATGAGGTTTTTTTTTTCTATTATTATGTATATTAGGCA  
TATATATACATATATATATTTTGCATACATATTCATTTTTTAAAAAATGCAACTGCTACACGCTTTGAAAG  
ATTC AATG

AAGTGTATTGCTCAGTAAGTATTATCATCTATTAAGAAGAATAAAAAATTATCATGTATTTATTTACAAGT  
GCGTATCCTATATATATATATATACTTTTCGCGATAAAATTTTTTACC AATACCCTTCTTAACACCT  
GGCAAATT

TCTATCATTTGAATTGAATATATAATTATATACAGTGAGATATACCAATTGCAGTAACAAAATGGCAAATA  
TGTATATCAGTAATATAATTAGCATATAAAATAAAAAAAAAAATGCTTATTTGTACCCGCTGACTGCGT  
TTCCTTTT

ACATAAAATCTTTTTTATAGTATTACTTTTTTGTGACATCAAAATGAAGCACTAAATAATTATAGAAAAT  
ATTCAGCAAAAAAAAAAGAAAACCTTCTTCTGAAAAAAAAAAAAAAAAAATTCAAAAAAGACACCTTCT  
ACCTTGGC

CCGAGTAACAATTTTCAGCATTGGGGGCGGGTTGAGTATAGATACGAGAAGCGCCTATTTTCGTATGAGGTT  
TTTTTTTTCTATTATTATGTATATTAGGCATATATACATATATATATTTTTGCATACATATTCATTTTTA  
AAAAATG

TTTCACAAATTATCCATTCTACATAAAATCTTTTTTATAGTATTACTTTTTTGTGACATCAAAATGAAGC  
ACTAAATAATTATAGAAAATATTCAGCAAAAAAAAAAGAAAACCTTCTTCTGAAAAAAAAAAAAAAAAAAT  
TCAAAAA

TCCCTTTTTGCCACCCGCTAATACTTTTATTTCTGTTCAACTATATATACATATATATATATTTACATATT  
TTTACCTCCCTATCTCTATTGATAATAAAACAAATAAAAATCGTATATTTTTGTATATGTATTATCGTTTT  
GAGGAGCG

GAATTGAATATATAATTATATACAGTGAGATATACCAATTGCAGTAACAAAATGGCAAATATGTATATCAG  
TAATATAATTAGCATATAAAATAAAAAAAAAAAATGCTTATTTGTCACCCGCTGACTGCGTTTTCTTTTTGA  
ATTATAAA

GCAAGCACTACGTATCACGACAAACCAACAGCCGCGCGTTTTTATATTCGAAAGAGAATTCCTGTGCGTT  
ATTGAATAATAATAACAAAATTTCTCCACTTTTACCATATTACCACTCCCTTTTTTTCAAGTAAAAAAA  
AAAAAAA

TTGGGGGCGGGTTGAGTATAGATACGAGAAGCGCCTATTTTCGTATGAGGTTTTTTTTTTTTCTATTATTATGT  
ATATTAGGCATATATATACATATATATATTTTTGCATACATATTCATTTTTAAAAAATGCAACTGCTACAC  
GCTTTGAA

TTATTTTTAATTTTTTTAATTATAAAAAATAATTTTTTTCTTTAAATTAACAAAAATAAAAAATTGTTTT  
TTGTTGGTTAAGATTTCCGAAAATAGAAATATTATTCAGTTGAAAGACAAAAAACATAAATATTTCTATG  
AGCAAACA

TTCTATTTGAATATATAAAATTATATTCTCAATTTTCACGTATATATTCACCTCACAAATAATATCATTCC  
TTTTAAAAAATATGTATTATTGTATAATGTTTCAGCATAGTCGTTTTTTAAGCCCTTTTTTTTTAACTT  
AAAAACA

GAGAACCACAAAAAATTAAAAAACGTGAAAACGATGGTTTAACTTTTTTCGAATTTGGTATACGTGG  
AAAAACGAATGTATAGATGCATTTTTTAAAGAATATATATAAAATTTAGTAATTGTATTCCGCGAGCGGCGC  
AATAGGTG

TAATTTAGACATACCTTGATGGCTGAACAGTAGTCAGAAAATTAAAAAAAAAAAAAAAAAAGCGCTTATTACGG  
CGTATACACGTAACCTATATAGACGTAGATCATTGAATATTGATATGATATAAATTTTTCCCGGGATTGCA  
GAATACTG

AAAAGATACTTTTTTCTTCTTCTTCTACGTCTCCTTTTTTTTTTTAAGAAAATTAACCTTATACCACTA  
TTTTGTTGCAATTGATCAAGAAAAATACAATTGAAAAGGTTTTACATTTTTAATTTTTCTGCTCATCGC  
GCTTTTTT

CTCTACATATAAGTGTATTGCTCAGTAAGTATTATCATCTATTAAGAAGAATAAAAAATTATCATGTATTT  
ATTTACAAGTGCATCCTATATATATATATATATACTTTTCGCGATAAAATTTTTTACCAAATACCCTT  
CTTAACAC

AAAAAACACGTCCCAAAACAGTCCTTCTTTAACAGTCGGTACCAGTAATAAATACTGTGTTGTTTGTGTTG  
CCCACCGCTAAATAAACGAACGGCGAAAAAATAGGCGGCAAAAGGCGGGTGATTTCGAAAAGTATCGCGCG  
CGACGAGG

ATATATATAAAAAAAAAAAAAAGCAATGCTGTGAGATCATTTCGTTACTTACGAAATACGCAGATTGCAATTT  
GAAATAAGCTGTGTTTTCTTTTTTTTTCTTTTTTTTTCTTTTTTTTTGGCTTGTTATATACAACTTTTTTCT  
ATTTCTGT

TTTTTCTTTCTTCTTCTACGTCTCCTTTTTTTTTTTTTAAGAAAATTTAACTTATACCACTATTTTGTTGCG  
AATTGATCAAGAAAAAATACAATTGAAAAGGTTTTACATTTTTTAATTTTTCTGCTCATCGCGCTTTTTTAA  
AAGGATAA

TAACTTGTGTCAAATGCCCCATTTCCATACTGTAACCCAAATCAACGAAATAAAAAATAAACCTCATATG  
ATTTACTTTATTTAGTCATAAAAAAACAAAAAAGGAAACAAGACAATCCTTTATAG  
TTTGTTC

CCAGGAATGCTTTTACAAATTATCCATTCTACATAAAATCTTTTTTTATAGTATTACTTTTTTGTGACATC  
AAAATGAAGCACTAAATAATTATAGAAAATATTCAGCAAAAAAAGAAAAACCTTCTTCTGAAAAA  
AAAAA

CTAGGCTCTGATTTCCAGAAGAAAGTGACATCGATGAATGCACTCAAGAGATTTTATGTGTTGTGAATATG  
TATATATTTATTTAGAAAAAACCAAAATCATATACCTTAGGCATCCCGTTCCCTC  
TTCATCAT

TGGATTCTTCGAGAGCTAAGACCATAGATTTCTTAAAAGAATTTTTTTTTTTTTCTGTCCTCCTAATAT  
CTTTTATCTTTAATACTGTAGGGCGCAAGTTTCTTTTTTTTTTTTTTTTTATGTTGCGTTTAGTTTTCT  
CTTGCAA

AAAAAATGAAAAAATACCAGAAAAAATAACAAATCATATGCACTTCTTCATTAACGATTATGAAGAA  
GTCTTATTTCTAATAATAATTATTATTATTATTATTATTATTATTATTATTATTATTATTATTATTATTATAA  
TTTGTTC

CAGTGGTCAATGGATTCTTCGAGAGCTAAGACCATAGATTTCTTAAAAGAATTTTTTTTTTTTTCTGTC  
CTCCTAATATCTTTTATCTTTAATACTGTAGGGCGCAAGTTTCTTTTTTTTTTTTTTTTTATGTTGCGTT  
TAGTTTTT

CTGAGAAAGATTCTACACACAGATATATATATATATATATATATTATTGTATATATACATACCTACATTAT  
TTTTAAAGGCTTGCATGATGCTGTTATGTAAAAAATCAGTGTAACATAATAGACGTAAC  
ACGTTCAA

TTAAAATTATTTTCAGTATAGTTATTATAATTAACATTGGAATAACATTAATAATAATAATTTTTTAATAGT  
AATAATGATAATAATAATAATAAAAAATAAAGAATAAATTTAAAAACAAAAAATTTCTAATATTAATGAT  
GATAATAG

CTAATGCATGGCCGGCTGGCCACATAAAAGGAAAAACACTCGATGATGATAAAATATATATTAATAATACA  
ATTTTTTTATTTATTTATTTAATCATATGTATAGATATAGAAAAGGGCAGTAGAGAAAAGAGGAATAGAA  
AGGAGAGA

TCTTCAATATCAGGTGAAATGTGTCTTGCCTAGACAATCTAAAAAAGGCTGCACACCCATGCATCATTCTA  
AAAAAATTTTTTTCTTTTCACTTTTCGTTTTTTTTTTTTTTTTTTTTCAGTTCGATTTCTTGGT  
CGGACGCG

GAGATTATCTTGACTGATATAAAATTTCTTATCATGGTAGTGATCACAAATAGATCACATGATATATTTTT  
TATTTTTAATTTTTTTAATTATAAAAAATAATTTTTTTCTTTAAATTAACAAAAATAAAAAATTGTTTTT  
TGTTGGTT

ACTTTTGCCAATTTTTTGCACAAAGTGGTGACGTACAAGTTCATCATTTTCAGTGTGCAGCATAGTGTG  
GTATATTGTTTTTTATATTTTATTTTTATTTTTTTTTTTTTTGCAGAAAACAGTGTGTTGATTATATGCT  
TTAGATAT



AGCCAAAAAATAATAAAAAAGCATAATTGGAGGCAGTAAAGCATTATAGTCATACACAATAATAATA  
TAATAATAATAATAATAATAATAATAATAGTAGTAGTAGTAATGGTAATAAAAAAGTTAGAAAAGAAATTA  
GATACAGA

CCACCCGCTAATACTTTTATTTCTGTTCAACTATATATACATATATATATATTTACATATTTTTACCTCCC  
TATCTCTATTGATAATAAAACAAATAAAAAATCGTATATTTTTGTATATGTATTATCGTTTTGAGGAGCGAG  
AGCGAAAA

GACCGTACTTTGCACGTGGCTGCAGACACATTTTGTATGGAGGAATGCTTGATTATATAAAGAGCTCTGT  
TTTTATGTTACCCGTCCAACGTTCTCACCCGGCTCCGCGCTATTTTTTTTTTTTTTTTTTTTTTTTTCAG  
ACCCACAC

ATCATTAGTAATTTTTCTCACTATAAGAAAAAAAAAAAAACATATATTTTGCTATGAATTATAATAAGTAA  
ATATATACATATATATGTACAGAGAACTGACGAAGAAAATAAATCACCCGTTAATGCTTCTTAGGTGCTC  
TTGAAAGT

AATTTACAGGAAGATTTTCTTGAAAAATAGAAAGAAAAATACCCATTTTTTCAAGGAAAATAAAATTTAT  
ATATTACATACATTTCTATAAAACAGTTTAAATTCAAAAATATAAACAAAAACATAAAAAATAAGAAAAGTT  
CAAGTCTT

AAGATTTTCTTGAAAAATAGAAAGAAAAATACCCATTTTTTCAAGGAAAATAAAATTTATATATTACATA  
CATTTCTATAAAACAGTTTAAATTCAAAAATATAAACAAAAACATAAAAAATAAGAAAAGTTCAAGTCTTCG  
TTATTTTC

TAATGTACATATATATATAAAAAAAAAAAAAAGCAATGCTGTGAGATCATTGTTACTTACGAAATACGCAG  
ATTGCAATTTGAAATAAGCTGTGTTTTCTTTTTTTTTCTTTTTTTTTCTTTTTTTTTGGCTTGTTATATACA  
ACTTTTTT

TCAATGATTAATGAAATGATGCATATAAGTAGCGCTTTTTTAAATATTATAAGTTTGGATAAAAGTTACC  
AATTTTTTCGTAGGATATATATTTTAAAGGCACTATATTGAAAATATCATGCATGCTTATATAAAAGCTTT  
TTTTTTTC

GATAAAACATATGAATAAAATAAATTGTGTCAAATGCCCATTTCCATACTGTAACCCAAATCAACGAAAT  
AAAAAATAAAACCTCATATGATTTACTTTATTTAGTCATAAAAAAACAAAAAAGGA  
ACAAGAC

GCATCATTCTAAAAAATTATTTTTTTTTCTTTTCATTTACTTTTCGTTTTTTTTTTTTTTTTTTTTCAGTTC  
GATTTCTTGGTCGGACGCGATGGCAAATTTTTCATCGAGAGATTATCGTTATAAAGGCCTGTTGATTTTCA  
AAGAGATA

ATTTTTCTCACTATAAGAAAAAAAAAAAAACATATATTTTGCTATGAATTATAATAAGTAAATATATACAT  
ATATATGTACAGAGAACTGACGAAGAAAATAAATCACCCGTTAATGCTTCTTAGGTGCTCTTGAAAGTTT  
TTATAAAC

GACAGCGATTTCAACAGTTACTACTGTGCTTAATGCCCTTATTTGATAGTTAGTTCTTCTTATAATAAATA  
ATCATTGTATATTGATTATTCGTATAGTATGATATTTAATTGAAAAAATTTTTTTTTTTTTTAAGAATA  
TCATTCAA

GCCGCGCCGTTTTTATATTCGGAAAGAGAATTCTTGTCGTTATTGAATAATAATAACAAAATTTCTCCACT  
TTTCACCATATTACCACTCCCTTTTTTTCAAGTAAAAAAGAAATCTTATTGCTCCTTAAAA  
AAGGATTC

TAACACACCTATCAAAAAATTATTCAGCAATTCGAATCTCGTTAGTAAAATATATTCTTATTTTTTTTTTT  
TTTCTCTGATTGTATTATTTCTGGAGTTTTGACTTATTTTTTTTACCACATCGCGCTTTTCGTCCTTAAATCT  
CTCTGATA

CGAAAAATGACATTTTTAGTTTGTGTAAAATTAATTTGATAAATAAATGAATGAAAATGATCAATAATAAG  
CGAATAACTATATTTTTAATTACCTTATTTTTACAATATTTTTCACTTGCACCTTTATTTTTATTTTCAGCG  
CGCAGCTC

ATTTTTTGGCGACAAAGTGGTGACGTACAAGTTCATCATTTTCACGTGTGCAGCATAGTGTGGTATATTGTT  
TTTTTATATTTTTATTTTTTATTTTTTTTTTTTTTTTGCAGAAAACAGTGTGTATTATATGCTTTAGATATGC  
TAAAAAAA

AAAAAATTAAAAAACGTGAAAACGATGGTTTAACTTTTTCGAATTTGGTATACGTGGAAAACGAAT  
GTATAGATGCATTTTTAAAGAATATATATAAAATTTAGTAATTGTATTCCGCGAGCGGCGCAATAGGTGAT  
TTCATTTA

ATTATCATCTATTAAGAAGAATAAAAAATTATCATGTATTTATTTACAAGTGCATCCTATATATATATA  
TATATATACTTTTCGCGATAAAATTTTTTACCAAATACCCTTCTTAACACCTGGCAAATTACCCTTCAGAGC  
GTTTTCTC

CTCAGTAAGTATTATCATCTATTAAGAAGAATAAAAAATTATCATGTATTTATTTACAAGTGCATCCTA  
TATATATATATATATACTTTTCGCGATAAAATTTTTTACCAAATACCCTTCTTAACACCTGGCAAATTAC  
CCTTCAGA

ACTAATGCGTGAATACGCGCTGGCATGTCCCATTCATGCATACATATATTCGTAAACATACACATATTCA  
TAAAAATTTTCAGTTATATTATATTATAATCTTTTTTTAACTATACAGAGAAGATATTAAAAAAATGTAT  
CCAAAGTG

AGCACACGACGACCGTACTTTGCACGTGGCTGCAGACACATTTTGTATGGAGGGAATGCTTGATTATATAA  
AGAGCTCTGTTTTTATGTTACCCGTCCAACGTTCTCACCCGGCTCCGCGCTATTTTTTTTTTTTTTTTTT  
TTTTTTTC

CTACTGTGCTTAATGCCCTTATTTGATAGTTAGTTCTTCTTATAATAAATAATCATTGTATATTGATTATT  
CGTATAGTATGATATTTAATTGAAAAAAAATTTTTTTTTTTTTTTAAGAATATCATTCAAAGGCATCAATCA  
CAACCTTG

TAGTCAGAAAATTAAAAAAAGCGCTTATTACGGCGTATACACGTAACATATAGACGTAGATC  
ATTGAATATTGATATGATATAATTTTTCCCGGGATTGCAGAATACTGACACGCCTTTTATTTATCGTTC  
ATCGTGTA

TATAATTATATACAGTGAGATATACCAATTGCAGTAACAAAATGGCAAATATGTATATCAGTAATATAATT  
AGCATATAAAATAAAAAAATGCTTATTTGTACCCGCTGACTGCGTTTCTTTTGAATTATAAAAG  
GTTCCCTTA

CTGCACTCAGGACGGGCCAAGAAAGCATGTAGCGTGAAGAGAACTAATTATTAAGAAAAAAGAAAAAAA  
AAAAAAGAAAAAAGAAAAAGGAAAAAGATAAACCAATCATAAATCTTTACAGAAAGGGAGTA  
CTGAGAAG

TGATCTCAGGATCATTAGTAATTTTTCTCACTATAAGAAAAAACAATATATTTTTGCTATGAATTA  
TAATAAGTAAATATATACATATATATGTACAGAGAACTGACGAAGAAAATAAATCACCCGTTAATGCTTC  
TTAGGTGC

CCTCCATTTGACAGCGATTTCAACAGTTACTACTGTGCTTAATGCCCTTATTTGATAGTTAGTTCTTCTT  
ATAATAAATAATCATTGTATATTGATTATTCGTATAGTATGATATTTAATTGAAAAAAAATTTTTTTTTT  
TTTAAGAA

ATTTTGTTCGAATTGATCAAGAAAAAATACAATTGAAAAGTTTTTACATTTTTAATTTTTCTGCTCATCG  
CGCTTTTTTAAAGGATAAATAAACATTTCTTTAAAAAACATCTTCAATAAGAAAAATCGGTTAAAAAAC  
TTTTCTTC



ATTACTTTTTTACATAAAAAATTTCCCATCTCACGATCAAAAACAGGCATGAGAAAAAATCAAAATTTATA  
AAATTAATTTCTAATAAATTAAGTGAATGACATAAAATAAGAGGCTGCGACAGTCAATTTTTTCTTTTT  
TTTTTTTT

TTATCTTCCGTTTTGACATGTTTTTTCAACGGCCGCTCCTTAAAGACCATCCGCATGCTAGAATTATATAC  
TAATATGATTTTGTAAAGATAGGAATATTATAATTATAATTATATTTAATTTAATAAGAAAAGAAACGAAA  
AAAAAAA

AAAAAAAAAAAAAAAAAATCAGTGTAACATAATAGACGTAACACGTTCAATGACATGATAACTATATAT  
AGTAACGATAAAATGTAAATGGTAATAGATATAATTATATGAATATTTAAGTAATGCATTGATAAGTGATC  
AATTCATA

GACGGCCAAGAAAGCATGTAGCGTGAAGAGAACTAATTATTAAGAAAAAGAAAAAAAAAAAAAAAAAAAA  
AAAAAGAAAAGGAAAAAGGAAAAAGATAAACCAATCATACAATCTTTACAGAAAGGGAGTACTGAGAAGAA  
GGCCAAA

TTCATTTCTTTTAAAATTATTTTCAAGTATAGTTATTATAATTAACATTGGAATAACATTAATAATAATAATT  
TTTTAATAGTAATAATGATAATAATAATAAAAAATAAAGAATAAATTTAAAAACAAAAAAATTTCTAA  
TATTAATG

GATCCATGTGTCTATCATTTGAATTGAATATATAATTATATACAGTGAGATATACCAATTGCAGTAACAAA  
ATGGCAAATATGTATATCAGTAATATAATTAGCATATAAAATAAAAAAAAAAATGCTTATTTGTACCCG  
CTGACTGC

TAAGAGGAAAGTATTTGTACAAAACGAAAACTAAAGGCAAATATATATATAGATGTTGCCGCGCACCTTT  
TTTTTAATGAATATTTACACAAATATTGAAAATAAAAAACAAACAAATTTCAAATAACAACATGTAAGACCA  
AAAAAAA

TGTGTTTTCTTTTTTTTTCTTTTTTTTTCTTTTTTTTTGGCTTGTTATATACAACTTTTTTCTATTTCTGTT  
CTTTTTAGAAGTAATTAATTGGTACATAGGAAATAAATATGAATTATATTAATGAAGTAAAAGTAAAAGA  
AAACGGGG

ACGGCAAAAAATACTGTAAGGAAGTTGTCTATATATGTACATATGGATATTGCGGTATAATAAAAAAGCTT  
TAAATTATAAAGAAACCCGACTTTTATCACATATAATTATATTATAAAAAATAATGGCATCTGTATGAA  
CTCGCGAT

GTTGCACTATAGTAAAACTACAGTGAAATTGATCTCAGGATCATTAGTAATTTTTCTCACTATAAGAAAA  
AAAAAAAAACATATATTTTGTCTATGAATTATAATAAGTAAATATATACATATATATGTACAGAGAACTGA  
CGAAGAAA

CACTCAAGAGATTTTATGTGTTGTGAATATGTATATATTTATTTAGAAAAAAAAAAAAAAAAAAAAACAA  
AATCATATACCTTAGGCATCCCGTTTTCCCTCTTCATCATTTTTTTGTCCCTTTATATCAATTTTTTTAGACTT  
CATATAAT

TTTCTTTTTCTATCTCTATTTTCTTTCTTTTCTGTTCTTATAATAATAATAATAATAATAATAATAATA  
AGTAATAATAAAAAATAGTAATAAATAAAGATGGATTTCTTTAATTTGAATAATAATAATAATAATAATA  
ACTACTAC

TCTTATTCTTCTACATATAAGTGTATTGCTCAGTAAGTATTATCATCTATTAAGAAGAATAAAAAATTA  
TCATGATTTTATTTACAAGTGCATCCTATATATATATATATATACTTTTCGCGATAAAATTTTTTACC  
AAATACCC

AGTCTCTAAGATGCGCTTGAAAAATTTTTCATACGAAAAAAAAAAAAAAAAAAAAAAAAAAAAAACTCGCAA  
GAGTAATCTCAATAATAATTTCCGTCATTAGCGATTATAGCATGAAGGGAGGCCGAGAGGCCGCTTCTGCG  
GTATGATA

CAATTGATCAAGAAAAAATACAATTGAAAAGGTTTTACATTTTTTAATTTTTCTGCTCATCGCGCTTTTTTA  
AAAGGATAAATAAACATTTCTTTAAAAAACATCTTCAATAAGAAAAATCGGTTAAAAAACTTTTCTTCTC  
AAAGCATA

TAGCGCTTTTTTTAATATTATAAGTTTGGATAAAAAGTTACCAATTTTTTCGTAGGATATATATTTTTAAAGG  
CACTATATTGAAAATATCATGCATGCTTATATAAAAAGCTTTTTTTTTTCTATAGGGTGACATTTAGGAGCA  
ATAATTTT

AGCATAAATTAATTGAACGGTCCCTTTTTGCCACCCGCTAATACTTTTATTTCTGTTCAACTATATATACA  
TATATATATATTTACATATTTTTACCTCCCTATCTCTATTGATAATAAAACAAATAAAAATCGTATATTTT  
TGTATATG

GAGTTTGAAGAAAAAGTTGATATTGAAAAAAAAAAAAAAAAAGAGAACCAAAAAAAAATTAACAAACGTGAAA  
ACGATGGTTTAAACAACCTTTTTTCGAATTTGGTATACGTGGAAAAACGAATGTATAGATGCATTTTTAAAGA  
ATATATAT

CGTATGAGGTTTTTTTTTCTATTATTATGTATATTAGGCATATATATACATATATATATTTTTGCATACAT  
ATTCATTTTTAAAAAATGCAACTGCTACACGCTTTGAAAGATTCAATGAAAAGTTTTTCCGACGACCAGA  
ATTGGCTA

CGGCTCCGCGCTATTTTTTTTTTTTTTTTTTTTTTTTTTTTTTTTTCAGACCCACACAAAATCCGCGTAGCCGAGATT  
GCTTATGTATGTTATCATATTGCCTGTTTGGATATGCAGGATCAGCATAGCATGTCTCTAACCAAATTGT  
GGGTCAGT

ATACAAGAAATGATCTTAAATCATGCTCTTACCCGTTCTGTAAATAGTGAAAAATTTTCATCGCGAAGTA  
TGAACGAAAAAAAAAAAAAGAAAATAGATGAACTTTTAGCATTTAATTAGTGGCAAACGCCTACCCCTCCTT  
CCCCTTT

AGATGAGATGAGTCTCTAAGATGCGCTTGAAAAATTTTTTCATACGAAAAAAAAAAAAAAAAAAAAAAAAAAAA  
ACACTCGCAAGAGTAATCTCAATAATAATTTCCGTCATTAGCGATTATAGCATGAAGGGAGGCCGAGAGGC  
CGCTTCTG

TAGGGGAAAATATGGTCCGTTAACACACCTATCAAAAAATTATTAGCAATTCCAATCTCGTTAGTAAAAT  
ATATTCTTATTTTTTTTTTTTTTTTTCTCTGATTGTATTATTTCTGGAGTTTTGACTTATTTTTTTACCACATC  
GCGCTTTT

CCTCCTAATATCTTTTATCTTTAATACTGTAGGGGCGCAAGTTTCTTTTTTTTTTTTTTTTTTATGTTGCGT  
TTAGTTTTTCTCTTGGCAAAAGTTTTTCGCACCCCGATCTTTTTTTGCATACGTAGTTCACTGCCGCTGCT  
TACGGCAG

TTTTTTTCTTTTTTTTTCTTTTTTTGGCTTGTTATATACAACCTTTTTCTATTTCTGTTCTTTTTAGAA  
GTAATTAATTGGTACATAGGAAATAAATATGAATTATATTAATGAAGTAAAAGTAAAAGAAAACGGGGAA  
ATTTATCG

TCAACAGTTACTACTGTGCTTAATGCCCTTATTTGATAGTTAGTTCTTCTTATAATAAATAATCATTGTAT  
ATTGATTATTCGTATAGTATGATATTTAATTGAAAAAAAAATTTTTTTTTTTTTTAAGAATATCATTCAAAG  
GCATCAAT

AATAATTAAGAGATGAGATGAGTCTCTAAGATGCGCTTGAAAAATTTTTTCATACGAAAAAAAAAAAAAAAAAAAA  
AAAAAAAAAACACTCGCAAGAGTAATCTCAATAATAATTTCCGTCATTAGCGATTATAGCATGAAGGGAG  
GCCGAGAG

TGAATATTATTAATTTAGACATACCTTGATGGCTGAACAGTAGTCAGAAAATTAACAAAAAAAAAAAAAAAAAGCG  
CTTATTACGGCGTATACACGTAACCTATATAGACGTAGATCATTGAATATTGATATGATATAATATTTTCCC  
CGGGATTG

TTATATTCTCAATTTTCACGTATATATTCACCTCACAAATAATATCATTCCCTTTAAAAAAAATATGTATT  
ATTGTATAATGTTTCAGCATAGTCGTTTTTTAAGCCCTTTTTTTTAAACTTAAAAACAAATCAATGAGAT  
ATTGTATA

TTATAGTCATGCTTCTTCTTTTGAATATTACCGATATTAGTAGTTTATATTTGATATTTCTATCAGTATTA  
TTTAGATTTTTTTTTTTTTTTTTTAAATTGTTAATGCTTTTTCTTAGAACTTTCCAAAAACGAAAGGAAAATGG  
GACATTCA

GCAATATGGCTAATTACACACCTGGAGAAAAAATCAGATATGTATATATAAGAATATTATAACTGTATA  
TTAAAAATGATTAATAAAGAAAAAATGAATCGGGCGTTTAAATTGCTTATTATCTTGAAGAAGCGAAAG  
TACACTAT

CTCGAACTATAGCGATGACTAAAAGTGAAAAATTTCAAAGCCAAAAGAAAAAAAAAAAAAGAAAATATTAT  
TTCAGCGGCTAATAGTTACCCGCATCAAATAATATATCTCTGTACGGTAATGAAAATTTTTGAAATATGC  
GATGAGCT

TCTTTTATCTTTAATACTGTAGGGGCGCAAGTTTCTTTTTTTTTTTTTTTTTTATGTTGCGTTTTAGTTTTTC  
TCTTGGCAAAAGTTTTTCGCACCCCGATCTTTTTTTGCATACGTAGTTCACTGCCGCTGCTTACGGCAGCG  
TTTCACTT

GAATACGCGCTGGCATGTCCCATTCATGCATACATATATTCGTAAACATACACATATTCATAAAAAATTTT  
CAGTTATATTATATTATAATCTTTTTTTAACTATACAGAGAAGATATTAAAAAAAATGTATCCAAAGTGAG  
TTAAAAAA

CTAATATGATTTTTGTAAAGATAGGAATATTATAATTATAATTATATTTAATTTAATAAGAAAAGAAACGAA  
AAAAAAAAAAAAAATGGAATTAATAAGTTTTGCCGTACATAAAATATTGAAAAGACTTTTACATTAATGCT  
GGAACAAT

AATTGAACGGTCCCTTTTTGCCACCCGCTAATACTTTTATTTCTGTTCAACTATATATACATATATATATA  
TTTACATATTTTTACCTCCCTATCTCTATTGATAATAAAACAAATAAAAAATCGTATATTTTTGTATATGTA  
TTATCGTT

GCTGTTATGTAAAAAAAATCAGTGTAACATAATAGACGTAACACGTTCAATGACATGATAA  
TACTATATATAGTAACGATAAAATGTAAATGGTAATAGATATAATTATATGAATATTTAAGTAATGCATTG  
ATAAGTGA

TTCTTCTACGTCTCCTTTTTTTTTTTAAGAAAATTTAACTTATACCACTATTTTTGTTGCAATTGATCAA  
GAAAAATACAATTGAAAAGGTTTTACATTTTTAATTTTTCTGCTCATCGCGCTTTTTTAAAGGATAAAT  
AAACATTT

AGCCTGGTATCTAGGCTCTGATTTCCAGAAGAAAGTGACATCGATGAATGCACTCAAGAGATTTTTATGTGT  
TGTGAATATGTATATATTTATTTAGAAAAAAAAAAAAAAAAAAAAACCAAAATCATATACCTTAGGCATCC  
CGTTTTCC

TTTTTTTTCAGAACTTCTTTTTCTGATTCAAAAATTCATTAAGCATAACTAAAATGAAAATCAAACTTAT  
TAATATACAAAAATCTATATATTTCAAATGTAAATCGTATCAAACGTCACCTCTATATGTAATAAAAACC  
CAAAAAGT

AGTAAAACTACAGTGAAATTGATCTCAGGATCATTAGTAATTTTTCTCACTATAAGAAAAAAAAAAAAAC  
ATATATTTTGTATGAATTATAATAAGTAAATATATACATATATATGTACAGAGAACTGACGAAGAAAAAT  
AAATCACC

TTCAGTATAGTTATTATAATTAACATTGGAATAACATTAATAATAATAATTTTTTAAATAGTAATAATGATA  
ATAATAATAATAAAAAATAAAGAATAAATTTAAAAACAAAAAATTTCTAATATTAATGATGATAATAGTA  
GTAATACT

GAAAAATACCGAGTAATAAAAAGGTAAAAGGGCGTTAAATGCGCGCTTTTATGTTTGTATAAATAAACACG  
TTGATATTTTGTCTTATATAAACTTTATTCCAATAACCGCGACACCTTACCAAACACATATTATTACAACA  
CATTTTTTA

GAAGTTGTCTATATATGTACATATGGATATTGCGGTATAATAAAAAAGCTTTAAAATTATAAAGAAACCCG  
ACTTTTATCACATATAATTATATTATAAAAAAATAATGGCATCTGTATGAACTCGCGATTAAGCTCACTTT  
TTTCTAAT

TTGTGAATATGTATATATTTATTTAGAAAAAAAAAAAAAAAAAAAAAACCAAATCATATACCTTAGGCATC  
CCGTTTCCCTCTTCATCATTTTTGTCCCTTTATATCAATTTTTTTAGACTTCATATAATTTTGTATCAACT  
GTACCCTA

TTTTGCAGAAAACAGTGTGTATTATATGCTTTAGATATGCTAAAAAAAAATGAAAAAAAAATGGAACAAA  
TATGTGTTTTTTTTATTTAACGTTAAAATTAAGATTAAGTTATTTATTTCGACGTCAGCATCAAAAGTTTGA  
CCTTCAAC

TCTCCTTTTTTTTTTTAAGAAAATTTAACTTATACCACTATTTTTGTTTCGCAATTGATCAAGAAAAAATAC  
AATTGAAAAGGTTTACATTTTTTAATTTTTCTGCTCATCGCGCTTTTTTAAAAGGATAAATAAACATTTCT  
TTAAAAAA

CGTATCACGACAAACCAACAGCCGCGCGTTTTTATATTCGAAAGAGAATTCCTTGTCTTATTGAATAAT  
AATAACAAAATTTCTCCACTTTTACCATATTACCACTCCCTTTTTTTCAAGTAAAAAAAAAAAAAAAAAAG  
AATCTTAT

GTATATATTTATTTAGAAAAAAAAAAAAAAAAAAAAAACCAAATCATATACCTTAGGCATCCCGTTTCCCT  
CTTCATCATTTTTGTCCCTTTATATCAATTTTTTTAGACTTCATATAATTTTGTATCAACTGTACCCTACA  
TCCCTTGG

ATTTAGAAAAAAAAAAAAAAAAAAAAAACCAAATCATATACCTTAGGCATCCCGTTTCCCTCTTCATCATT  
TTTGTCCCTTTATATCAATTTTTTTAGACTTCATATAATTTTGTATCAACTGTACCCTACATCCCTTGGTA  
TTCAAAT

TTTCTACAAGATAAAACATATGAATAAAATAAATTGTGTCAAATGCCCATTTCCATACTGTAACCCAAA  
TCAACGAAATAAAAAATAAACCTCATATGATTTACTTTATTTAGTCATAAAAAAACAAAAAAAAAAAAAA  
AAAAAAG

TTCTTGAGGAAGACTTGCTTGAATATTACGAGACAGCTGAAGTAAGTTTGAATAATTAAGAGATGAGATGA  
GTCTCTAAGATGCGCTTGAAAAATTTTTCATACGAAAAAAAAAAAAAAAAAAAAAAAAAACACTCGCAAG  
AGTAATCT

GAAAATATAACCTCTTTGGGGAAAAGAGAAATAGATCCTTTCTCAAAAATTTAGAAAGGAAAAAAAAATCAA  
AATATAATAAATAGATTTTTTTTTAGGTTAATTTTTTGCCAATTTAGCTAGACTTTTTGAAAAGATCCAAA  
ATTTACTA

AGTGGGATAGAAATGAAATTCCTTTCTTTTAAATGGTATTAATAATTAATATATTAATAATTATATTGAT  
TCTATACATAAAACATTAGTGTGAAATTTTCGAAAATAATAATAGAAAGTAAAATCAAATGTAAAATTAA  
AAAAATGA

GTATAAGTACTCTATTAACATCGTTATTTTTCTCTTTTATTACTATTAATATTATTATATTTTGAAGATAG  
AAAAGACTAATATATATATAGTATAATTTTTAAAATTAATTCGGTACAAAAGGCAAAGAAATTGTCTTCT  
TACTTAAA

CCTCTTTGGGGAAAAGAGAAATAGATCCTTTCTCAAAAATTTAGAAAGGAAAAAAAAATCAAATATAATAA  
AATAGATTTTTTTTTAGGTTAATTTTTTGCCAATTTAGCTAGACTTTTTGAAAAGATCCAAAATTTACTAAA  
ATTGAATC

TTATACCACTATTTTTGTTTCGCAATTGATCAAGAAAAAATACAATTGAAAAGGTTTTACATTTTTTAATTTTT  
CTGCTCATCGCGCTTTTTTAAAAGGATAAATAAACATTTCTTTAAAAAACATCTTCAATAAGAAAAATCGG  
TTAAAAAA

TTTCAAATTTCTCGAACTATAGCGATGACTAAAAGTGAAAAATTTCAAAGCCAAAAGAAAAAAAAAAAAAAG  
AAAATATTATTTTCAGCGGCTAATAGTTACCCGCATCAAATAATATATCTCTGTACGGTAATGAAAATTTT  
TGAAATAT

GATACATTTTTTTGATCGTGTGATGAAAGTATTAACATAGCTTTAGGGTTCTTCCATTGGATATCCAAAATA  
GATATAAAGGTATATATATATATATATATATATATATGTTTTATAAAGCAAACCGAAAGCAAAAATATCTGT  
ATAACTTA

CAGAAGGAATCATTAGCTAAAAAGTTTATTATTAAAATCAGACATATATCTCATTATAATATTTTTTTTTT  
ATAATACCACCATTTGTTCTCATATAATACTGATAAATATCGCATCGAATGGAAAAGACAAATAGGAGGCC  
GCTATTGT

TAGAAAAAATTATAGAAGATTGAAACTGAGCAATATGGCTAATTACACACCTGGAGAAAAATCAGATAT  
GTATATATAAGAATATTATAATACTGTATATTTAAAAATGATTTAAAAATAAAGAAAAAATGAATCGGGCGTT  
TAATTGCT

GTCTACGTTCCTAATGCATGGCCGGCTGGCCACATAAAAGGAAAAACACTCGATGATGATAAATATATAT  
TAATAATACAATTTTTTTTTATTTATTTATTTAATCATATGTATAGATATAGAAAAAGGGCAGTAGAGAAAAG  
AGGAATAG

AGAAAAAATACAATTGAAAAGGTTTTACATTTTTTAATTTTTCTGCTCATCGCGCTTTTTTAAAAGGATAAA  
TAAACATTTCTTTAAAAAACATCTTCAATAAGAAAAATCGGTTAAAAAACTTTTCTTCTCAAAGCATACC  
TAATAACA

ATGTCAAACGCGTAGGAAAGCCAAGCTCAATTACGCGTCTCTTTTATTTTTAAACTATCAAATTGCCGCGC  
ATGCTAGATGAATAAGGAAAAAAAAAAGGGGACGGAAAACATTGCAACCAACACATTATTCTTTAGCGGCT  
TTTTGTGA

AATTATGATACTGCACTCAGGACGGGCCAAGAAAGCATGTAGCGTGAAGAGAACTAATTATTAAGAAAA  
AGAAAAAAAAAAAAAAAAAAAAAAAAAAGAAAAGGAAAAAGGAAAAAGATAAACCAATCATACAATCTTTACAG  
AAAGGGAG

TTACTAAATTAATTATGATACTGCACTCAGGACGGGCCAAGAAAGCATGTAGCGTGAAGAGAACTAATTA  
TTAAGAAAAAGAAAAAAAAAAAAAAAAAAAAAAAAAAGAAAAGGAAAAAGGAAAAAGATAAACCAATCATACA  
ATCTTTAC

TAACATTGGAATAACATTAATAATAATAATTTTTTAATAGTAATAATGATAATAATAATAATAAAAAATAAA  
AGAATAAATTTAAAAACAAAAAATTCTAATATTAATGATGATAATAGTAGTAATACTGGTGGTATTATA  
TATGTTGA

ATTAAGAAGAATAAAAAATTATCATGTATTTATTTACAAGTGCATCTATATATATATATATATATACT  
TTCGCGATAAAATTTTTTACCAAATACCCTTCTTAACACCTGGCAAATTACCCTTCAGAGCGTTTTCTCTA  
AATTGATA

ACTACGTTAAGAAAAATACCGAGTAATAAAAGGTAAAAGGGCGTTAAATGCGCGCTTTTATGTTTGTATAA  
ATAAAACACGTTGATATTTGTCTTATATAAACTTTATTCCAATAACCGCGACACCTTACCAAACACATAT  
TATTACAA

ATTTCAACGCTTGTTTAAACATGTGCTAGGTAAGCGAGTTTTTTACTTTTACTTCCAATAAATATATATAT  
ATATATACGTATACATGTATGGGCGGGCTACAACAAAATGAAATAAAAAGCGTCAGGATCATTGTTTTTTA  
CCATACTT



GACAAAAAAGAAAGAAAAGAAAAAGAAACAGTCTACAAATTCATTTGAATATATAAAAATTATATTCTCA  
ATTTTCACGTATATATTCACCTCACAAATAATATCATTCTTTAAAAAAAATATGTATTATTGTATAATG  
TTTCAGCA

TAATTACCCGTAATAAGGTTTGGAAAAGAAAAAGAGACCGCCTCGTTTCTTTTTCTTCGTGAAAAAGG  
CAATAAAAATTTTTATCACGTTTCTTTTTCTTGAAAATTTTTTTTTTTGATTTTTTTCTCTTCGATGACC  
TCCCATTG

TTTAGGGTTCTTCCATTGGATATCCAAAATAGATATAAAGGTATATATATATATATATATATATATGTT  
TATAAAGCAAACCGAAAGCAAAAATATCTGTATAAAGTTTACAAGGGAAGGGAAGAGAATGCATTGGTT  
AATAGGAA

AATGCAACACGAAGTTTGAaaaaaaGTTGATATTGAAAAAAAAAAAAAAAAAGAGAACCAAAAAAAAATTAAA  
AAACGTGAAAACGATGGTTTAAACAACTTTTTTTCGAATTTGGTATACGTGGAAAACGAATGTATAGATGCA  
TTTTTAAA

AAGAAAAAAAAAATACAACGATAGTTCTTTGTTTTCTTTAGGAAATATCTGAATAGAAAAGGCTTCAAC  
GACCAGAATTGAAAAAATAAATAGTATTAGCAAAGAAAAATATGATATTTTTTTTCAAAAAAAAAAAGAG  
TGTCCTTG

GGTTACCATTACTTACGATTTTTTTTTTTTTCTGTTATGAACCCTGTGCCCGAGGGGTTTTTCAGGCACATAGA  
TCAAAGTTCTACTCGTTTACCTGTAATCTTGGCGCGTTTAGGTCTCTTTTTTTTTCTTTTTTTTTCTTCT  
TTTTTCAT

TATAGTTTTTTTAGATCCAATTTTTTTTTGTTGGCCATCTTAATATTACTACAAATTATATTAaaaaaAGGT  
TTTTGTTAAATTTAGTAAAATTCGAAAACAAAATTCGATTTTGCCTGTGGATTAGTTTTTGTCTGTTTCA  
TGTACGGG

CTGTAGTTTCAGCCAAAAAATAATAAAAAAGCATAATTGGAGGCAGTAAAGCATTATAGTCATACACA  
ATAATAATAATAATAATAATAATAATAATAATAATAATAATAGTAGTAGTAATGGTAATAAAAAAGTTAGA  
AAAGAAAT

CAATTGAAAAGTTTTACATTTTTTAATTTTTCTGCTCATCGCGTTTTTTTAAAAGGATAAATAAACATTTT  
TTTTAAAAACATCTTCAATAAGAAAAATCGGTTAAAAAACTTTTTCTTCTCAAAGCATAACCTAATAACAAT  
ATAATCCC

TGAGTTTTTCAAAAAATAAATGAGGAAACACACACATGTGTCTAGCGTAAATATTCTTCAGTTATATAGTAA  
TTGTATTATATACTAAAATGAAAATCAGTAAGATTTTTTTTTTACAGGCCTTCTTGGCGTTAGTTTTTCCG  
GTTTTTCA

TTAAAAACAAAAAATTCTAATATTAATGATGATAATAGTAGTAATACTGGTGGTATTATATATGTTGAA  
GTGAACACGCATATCACTATAAACTATATATACATATATATAGATAGATAGATGCAAAAAATTTTTTT  
CCTTTTAG

TTTTTAATAGTAATAATGATAATAATAATAAAAAATAAAAGAATAAATTTAAAAACAAAAAATTCTA  
ATATTAATGATGATAATAGTAGTAATACTGGTGGTATTATATATGTTGAAGTGAACACGCATATCACTATA  
AACTATAT

CAAATGCCCCATTTCCATACTGTAACCCAAATCAACGAAATAAAAAATAAAACCTCATATGATTTACTTTA  
TTTAGTCATAAAAAACAAAAAAGGAAACAAGACAATCCTTTATAGTTTGTTCCTCA  
TCATGAAA

TTGCATAATTAATTTACAGGAAGATTTTCTTGAAAAATAGAAAGAAAAATACCCATTTTTTCAAGGAAAA  
TAAAATTTATATATTACATACATTTCTATAAAACAGTTTAAATTCAAAAATATAAACAAAAACATAAAAAAT  
AAGAAAAG

GAAAAGAGAAATAGATCCTTTCTCAAAAATTTAGAAAAGGAAAAAAAAATCAAAATATAATAAAAATAGATTTT  
TTTTAGGTTAATTTTTTTGCCAATTTAGCTAGACTTTTTGAAAAGATCCAAAATTTACTAAAATTGAATCTT  
TCTGGTAT

AAAGCATAATTGGAGGCAGTAAAGCATTATAGTCATACACAATAATAATAATAATAATAATAATAATA  
ATAATAATAGTAGTAGTAGTAATGGTAATAAAAAAGTTAGAAAAGAAATTAGATACAGATATTCGTAGTAA  
AGGCCACG

GCAAAAAACGAAAATGTAATGGAGTCATGCAAACATGACTAATAGTAACAAAAAAAAAAGATATAGTAGA  
ATTGAGTAAGTAAGTTCTATGTATATTGTTGTTATTTTTCTCTAAAAAAAAAAAAAAAAACTATGTAAAATTAG  
GAATTAAG

GAATTGGCTAGCAAAAAACGAAAATGTAATGGAGTCATGCAAACATGACTAATAGTAACAAAAAAAAAAG  
ATATAGTAGAATTGAGTAAGTAAGTTCTATGTATATTGTTGTTATTTTTCTCTAAAAAAAAAAAAAAAAACTAT  
GTAAAATT

ATAACATTAATAATAATAATTTTTTAATAGTAATAATGATAATAATAATAATAATAAAAAATAAAAGAATAAATT  
TAAAAACAAAAAAATTTCTAATATTAATGATGATAATAGTAGTAATACTGGTGGTATTATATATGTTGAAG  
TGAACACG

AAGACGCCTACTTAAACTGCAATGAATAGTCACCCATAGGTATAAGAAAAAAAAAAAAAAAAATAAAGAGTAC  
ATAATATACATACAACCTAAAATTTAAATGCATAGAAACCTAAGAAAAATATTTGTTATACCAAAAAAAT  
ACCACAAA

ATTAAACAAAGTACCCAGAGACAAAAAGAAAGAAAAGAAAAAGAAACAGTCTACAAATTTCTATTTGAA  
TATATAAAATTATATTCTCAATTTTCACGTATATATTCACCTCACAAATAATATCATTCTTTAAAAAAA  
ATATGTAT

AAGACCTGGCAGTGGAGGCATGACAGAGGATATCGCGAAACGATTGTTTAAAGAGTATATTATAAAGTTGAC  
TTGTTTCTTTATAATTATAATTATAATATATATATATATAGATTATTCACAGGAGAAATTGGGGGCACAAAT  
GAGGGGTA

CCTTTAAACTATTAAAGAAGCTGTTTCGCAACTCACAAAAAAATAAAAAATAAAGCAGAACGAAAAAAA  
AAAAAACAAAAAAACAGTTAACTATTCTAATTACTTAGAATCTTTAAAGTCTTACTGTAATTCGATCA  
GTGGAGAA

CTTAAACTGCAATGAATAGTCACCCATAGGTATAAGAAAAAAAAAAAAAAAAATAAAGAGTACATAATATACA  
TACAACCTAAAATTTAAATGCATAGAAACCTAAGAAAAATATTTGTTATACCAAAAAAATACCACAAATG  
ATACGTAA

CCTGGAAAAATGGGGAAATTTTCATGTACGTCTCCATCAATAGTCATTTTTAAATTTTAGGTTATTTTTGTGT  
TTGCATATATAAATGGTATATATATATATATATATATATATATATATATATATATATATATATATATAT  
AGATACAT

ACCACCCGGGTGTGGATGTGGATGCAAAAATAACAGTGAAATGAGTAATAACAATGGTCATAAACATGTGGT  
GTGCAATGTGTATCTTCGCGCGCGTGCTAAAAAAACGAATAACGGTGGTGATCCGCGGGCTTTCCACAC  
TGACGGGG

CGGTGATAGACGAGCTTCGCTTATAGTCATGCTTCTTCTTTTGAATATTACCGATATTAGTAGTTTATATT  
TGATATTTCTATCAGTATTATTTAGATTTTTTTTTTTTTTTTTTAATTGTTAATGCTTTTTCTTAGAACTTTT  
CAAAAACG

AAAGAAAAGAAAAAGAAACAGTCTACAAATTTCTATTTGAATATATAAAATTATATTCTCAATTTTCACGT  
ATATATTCACCTCACAAATAATATCATTCTTTAAAAAAATATGTATTATTGTATAATGTTTCAGCATA  
GTCGTTTT

GTTAGTTTATAAATAAAATTTTATATCACTATATGTGTGGTGAAAAGGAAGAGCAATCCTGCTAAAGCTTTT  
ATATCTAAACGCCAAAAAATAAAAAAAAAAAGGAAATGGGAGAAAAGTTTTTCAGCGCGCGAACTCGCGAAA  
AAACTTCC

TCATTATTACTAAGTAGTGCATCACCCTTGTCTAAATACCAAACGCAAAATATATATATTCTTACTTCAT  
AACGTTCAAATAAAGTTTTTTAGTTTAAAATAAAATAAAATAAAAAAAAAAAAAAAAAAAAAAAAAAAGAACCT  
TTTGTTTT

TTTATTCTTGCCATCCGTGTACGCTAGGAGAGGATTATTTAAAATAAGTGATATATACATATATATATATAT  
ATATATATATATAATACTAATTATTTTTATGTGATGTTGATCACGCGAAACGGTAAACGGCTCTGTTCCG  
GCTTTCTT

TATATCACTATATGTGTGGTGAAAAGGAAGAGCAATCCTGCTAAAGCTTTTATATCTAAACGCCAAAAAA  
TAAAAAAAAAAGGAAATGGGAGAAAAGTTTTTCAGCGCGCGAACTCGCGAAAAAACTTCTCTTTAGCAATG  
GTGACATA

AAAAAATTCGATTATAAAATAGTACAATGTCCAGAAGCTTGGTTTTTAAATAGTATATAATAAAGATAAAGA  
TAGATAGAGAACATAACTCTAAACTTTAAGAGTGAATTTTTTTTTTTTTTTAGTTTAGTTTTTTTTTTTTTTT  
TTTTTACA

CAACTCCGTGATCGCGGCCACGGGCCGTGCGCGGCTGTTAATTGAAGAAAAAAAAAATGAAGAACCACAA  
GGGGTGATCCATATAGGTGACTAGCATCATCCCCTGCGACGCGCGGCCCGGGCCAAAGGCGGGCAATG  
CGCGCTGC

AAATAAATTTTATATCACTATATGTGTGGTGAAAAGGAAGAGCAATCCTGCTAAAGCTTTTATATCTAAAC  
GCCAAAAAATAAAAAAAAAAAGGAAATGGGAGAAAAGTTTTTCAGCGCGCGAACTCGCGAAAAAACTTCTCT  
TTTAGCAA

CCATCCGTGTACGCTAGGAGAGGATTATTTAAAATAAGTGATATATACATATATATATATATATATATATAT  
ATAATACACTAATTATTTTTATGTGATGTTGATCACGCGAAACGGTAAACGGCTCTGTTCCGCGCTTTCTTTG  
TTTACATT

TAAGTAGTGCATCACCCTTGTCTAAATACCAAACGCAAAATATATATATATTCTTACTTCATAACGTTCAA  
ATAAAGTTTTTTAGTTTAAAATAAAATAAAATAAAAAAAAAAAAAAAAAAAAAAAAAAAGAACCTTTTGTTTTCG  
CCCAGTAT

TTACTATATTAATATCACGTCACACGACGCACAGTGAGAAGTGAAAAATTTTTTTTCAATCTGAAAAAAA  
AAAAAAAAAAAAAAAAAATTTATATAAACGAATGGTATCTCCATCACATTTCTTTTAGCCTCGCAACTTGT  
ACTTTTTCA

TAACCCGTAGTATTAGTTCCCATATAATTCCGACCGAGAAAGGTGCACCCACTTGTACATACAAATTGTAC  
ATATATATATATATATATATATATATATATATATATATATATATATATATATATATATATATATATATAT  
ACTCTGCG

CTGAAGCCAGTTTATTCTTGCCATCCGTGTACGCTAGGAGAGGATTATTTAAAATAAGTGATATATACATAT  
ATATATATATATATATATATAATACTAATTATTTTTATGTGATGTTGATCACGCGAAACGGTAAACGG  
CTCTGTTT

ATCGCGCGCCACGGGCCGTGCGCGGCTGTTAATTGAAGAAAAAAAAAATGAAGAACCACAAGGGGTGATCC  
ATATAGGTGACTAGCATCATCCCCTGCGACGCGCGGCCCGGGCCAAAGGCGGGCAATGCGCGCTGCTG  
ATTGGCCT

TAATTTAAAGCATATTCAATCATAATAAAAAAAAAAAGAGAATTATTAGGAAAAATAAAAAAAAATAA  
TATATAATATATGATGTAGAAAAAATCTTGAAATTTTTATCGATTGCAATAAAATGGAATTTAAAAAAGT  
GGGAAAGA

AATATCACGTCACACGACGCACAGTGAGAAGTGAAAAATTTTTTTTCAATCTGAAAAAAAAAAAAAAAAAAAA  
AAAAAAAAATTTATATAAACGAATGGTATCTCCATCACATTTCTTTTAGCCTCGCAACTTGTACTTTTCATC  
ACTTTTCT

CATATTCATCATAATAAAAAAAAAAAAAAGAGAATTATTAGGAAAAATAAAAAAAAATAATATATAATAT  
ATGATGTAGAAAAAATCTTGAAATTTTTATCGATTGGAATAAAATGGAATTTAAAAAAGTGGGAAAGAAA  
CAATGAGA

CACACGACGCACAGTGAGAAGTGAAAAATTTTTTTTCAATCTGAAAAAAAAAAAAAAAAAAAAAAAAAATT  
TATATAAACGAATGGTATCTCCATCACATTTCTTTTAGCCTCGCAACTTGTACTTTTCATCACTTTTCTTG  
TAATTTAG

ATTTACTTGTGTTAGTTTATAAATAAATTTTTATATCACTATATGTGTGGTGAAGGAAAGAGCAATCCTGC  
TAAAGCTTTTATATCTAAACGCCAAAAAATAAAAAAAAAAAGGAAATGGGAGAAAAGTTTTTCAGCGCGCGA  
ACTCGCGA

ATCACCCTTGTCTAAATACCAAACGCAAAATATATATATTCTTACTTCATAACGTTCAAATAAAGTTTT  
TAGTTTAAAAATAAAATAAAATAAAAAAAAAAAAAAAAAAAAAAAAAAAGAACCTTTTGTTCGCCCAGTATAT  
GGGTAAAT

CATAATAAAAAAAAAAAAAAGAGAATTATTAGGAAAAATAAAAAAAAATAATATATAATATATATGATGTAGA  
AAAAAATCTTGAAATTTTTATCGATTGGAATAAAATGGAATTTAAAAAAGTGGGAAAGAAACAATGAGAAT  
TCATAGGA

TGTTGTTGTATCATTATTACTAAGTAGTGCATCACCCTTGTCTAAATACCAAACGCAAAATATATATATT  
CTTACTTCATAACGTTCAAATAAAGTTTTTAGTTTAAAAATAAAATAAAATAAAAAAAAAAAAAAAAAAAAA  
AAAAGAAC

TCTTACTTCATAACGTTCAAATAAAGTTTTTAGTTTAAAAATAAAATAAAATAAAAAAAAAAAAAAAAAAAAA  
AAAAAGAACCTTTTGTTCGCCCAGTATATGGGTAAATTAACGGTTCCTTTTATTAGTCATTTTCAACTC  
TATACCAT

ATTATAAAATAGTACAATGTCCAGAAGCTTGGTTTTTAATAGTATATAATAAAGATAAAGATAGATAGAGA  
ACATAACTCTAACTTTAAGAGTGAATTTTTTTTTTTTTTAGTTTAGTTTTTTTTTTTTTTTTTTTACAAT  
AATGTATT

GTCTAAATACCAAACGCAAAATATATATATTCTTACTTCATAACGTTCAAATAAAGTTTTTAGTTTAAAA  
TAAATAAAATAAAAAAAAAAAAAAAAAAAAAAAAAAAGAACCTTTTGTTCGCCCAGTATATGGGTAAATTA  
ACGGTTCC

ACTTCATCATGATCATTAAATTTTATATTCATATTCATATTCGGTTATTTTTTTTTTTTTTTTATATTTTTTTTCAATG  
GTGTTTTTGTGTTTATTATATATATATATTTTTTTTATCTTTTATCTTGTGTAAGCACCCCTCATTAC  
TTGTATCG

TGCCTACTTCTACTTCTGGGAAAGGCATTTTTACTCGATCGCGTTAATATATGCATCAAGAAAAATAAAAA  
TAAACGCGAAGAGCTAAAAAAAAAAAAAGAAACCTACTATAAATAACCGATTAGAATCGAGTTTTTGTAT  
TGAAATGG

GTAAAAATTAACCTTCATCATGATCATTAAATTTTATATTCATATTCATATTCGGTTATTTTTTTTTTTTTTTTATATTT  
TTTTTCAATGGTGTTTTTGATGGTTTTTATTATATATATATATTTTTTTTATCTTTTATCTTGTGTAAGCAC  
CCCTCATT

ACAGTGAGAAGTGAAAAATTTTTTTTCAATCTGAAAAAAAAAAAAAAAAAAAAAAAAAATTTATATAAACG  
AATGGTATCTCCATCACATTTCTTTTAGCCTCGCAACTTGTACTTTTCATCACTTTTCTTGTAAATTTAGCA  
ATATCCCA





AAAAACGAAAAAAAAACATAACTAAATTTAAAGTGCAGCCCAACAATAACCCTGAAAAATCTAAATATCTTA  
GAATTTTTTTTATTTTATTATTATATATTATTATTATTCTTATGGTAAATAATGCCCTACTTTTCTTCTA  
AGGAAGTG

AATAAAGTTTTAGTTTTAAATAAAAATAAAAATAAAAAAAAAAAAAAAAAAAAAAAAAAAGAACCTTTTGTTTTT  
GCCAGTATATGGGTAAATTAACGGTTCCTTTTATTAGTCATTTTCAACTCTATACCATGCTCCAAAACGG  
CGTTCGGC

ATACGTGATTTGAAGTTTTTAAGTATCTGAAATACATACGCGCGGTATGCATATGTATTAGTTAAATTAC  
TCGAATGTCCTTTATATAATATTACATTTTTTACACACACATTCTTGAAGAAGAAATCCCGATCGTAAAAA  
AAACACCG

TCGTAGTTAGTTCTGAAATTTTTAGGGTGGTAATTTAAAGCATATTCAATCATAATAAAAAAAAAAAAAAGA  
GAATTATTAGGAAAAATAAAAAACAAAATAATATATAATATATGATGTAGAAAAAATCTTGAAATTTTTAT  
CGATTCTGA

TTTCTTATTTTTTAAAATCGATAGTTCTTCAGGATCTTGGTCCACATATATATATATATATATATACACTT  
ATATAAAATAAGACGTTTATTTAATCTTGTCTTACGAGTTCTTTTTTTTTCTTTTTTTATTTTCTAC  
TTTTGCAA

GTTATAGCTCTAACCCGTAGTATTAGTTCCCATATAATTCCGACCGAGAAAGGTGCACCCACTTGTCTATA  
CAAATTGTACATATATATATATATATATATATATATATATATATATATATATATATATATATATATATAT  
GCACGCGA

CTATATACTTTTCGTAGTTAGTTCTGAAATTTTTAGGGTGGTAATTTAAAGCATATTCAATCATAATAAAAA  
AAAAAAAAAGAGAATTATTAGGAAAAATAAAAAACAAAATAATATATAATATATGATGTAGAAAAAATCTTG  
AAATTTTT

AATATAGAAATTTTTAAAAAAAAAAACGAAAAAAAAACATAACTAAATTTAAAGTGCAGCCCAACAATAACC  
TGAAAAATCTAAATATCTTAGAATTTTTTTTATTTTATTATTATTATTCTTATGGTAAATA  
ATGCCCT

AAATTTTATTCTATGCTTTTCTCTCGATGAGATGAGCTGTGAAAAATTTTGAAAAAATAAAAAAAAAAAAA  
AAAAAAAAAAATTTGTTATCACCAATAACGAGAAACCTAACTCTAAACTTAGGGTCAAAGAACAGAACC  
CTAGGCTT

GGCTTGAAATATGGATGTCTTGCCTACTTCTACTTCTGGGAAAGGCATTTTTACTCGATCGCGTTAATATA  
TGCATCAAGAAAAATAAAAAATAAACGCGAAGAGCTAAAAAAAAAAAAAGAAAACCTACTATAAATAACCGA  
TTAGAATC

CAGATAGGAAACCCTATCTCCAGTGATAAACTTTAATTTTTTTTTCGTGCATATATATATATATACATATATA  
ATATAAACAAAATATCATGAATTTCTATCTAAAGTAGTGGGAAAAAATATGTCGTTAAAAATGGGTATAA  
TATCCAAG

CATATGCTCATCGGGAACCTTTTTAAGCAATAATAGATTTTAAAGTATGTAATGATACAAATAATAATATA  
TTTATATACGCATATATTTACATGTGCATATATGAAAAATAACCTAATTCACGTTACCCACCTTTTTTTTT  
AGCCTTTT

ACGTTTCTCAGTAAAAATTAACCTTCATCATGATCATTAATTTTCATATTCATATTCGGTTATTTTTTTTT  
TTTTTATTTTTTTTTCAATGGTGTTTTTGATGGTTTTTATTATATATATATATTTTTTTTTATCTTTTATCTT  
GTGTAAGC

CCTCTCGATGAGATGAGCTGTGAAAAATTTTGAAAAAATAAAAAAAAAAAAAAAAAAAAAAAAAAATTTGTTAT  
CACCAATAACGAGAAACCTAACTCTAAACTTAGGGTCAAAGAACAGAACCCTAGGCTTTGTATCCAGTTG  
AATCACTA

TTACTCGATCGCGTTAATATATGCATCAAGAAAATAAAAAATAAAACGCGAAGAGCTAAAAAAAAAAAAAGA  
AAACCTACTATAAATAACCGATTAGAATCGAGTTTTTGTATTGAAATGGCGGTAATAAGCGTTAAACCTCG  
ACGAAGAG

TTTTTTTTTTTTTTTTATATTTTTTTTTCAATGGTGTTTTTGATGGTTTTTATTATATATATATATTTTTTTA  
TCTTTTATCTTGTGTAAGCACCCCTCATTACTTGTATCGTGCATATACAAATACCAAACAAACTCTATAA  
TCATAGAA

AGAAAAATGGCAAATACTGTAAAATACTTAAACATTTAACTAAATTTTTATTCTATGCTTTTCCTCTCGATGA  
GATGAGCTGTGAAAAATTTTGAAAAAAAAAAAAAAAAAAAAAAAAAAAAAAAAATTTGTTATCACCAATAACG  
AGAAACCT

TAAAAATCTCCGGGGCTAGCTTTTGCCGGGGAACCCATCCCGAAAAAATTGCAAAAAAAAAAATAGCCGCC  
GACCGTTGGTGCCTATTCACGGAATGATAGAAAAATAGCCGCGCTGCTCGTCCTGGGTGACCTTTTGTATA  
TTGTATAA

CATAAAATGCTTCACGAACACCGTCATTGATCAAATAGGTTTATAATATTAATATACATTTATATAATCGG  
CGGTATTTATATCATCAAAAAAGTAGTTTTTTATTTTTATTTTTTCATTACTTTTCACTGTCTATGGATTT  
TCATTTCGT

TTGTTGCCACTTTTTAATGTGAACTAAAAAATAAAAAATGAATATAAGGTACGTCTCCAAAAGAAATGTAA  
ATATAGAAATTTTAAAAAAGGAAAAAAGGAAAAAAGGAAAAAAGGAAAAAAGGAAAAAAGGAAAAAAGG  
GAAAAATC

TTAGTTTAAAAATAAAATAAAATAAAAAAAAAAAAAAAAAAAAAAAAAAAGAACCTTTTGTTCGCCAGTATA  
TGGGTAAATTAACGGTTCCTTTTATTAGTCATTTTCAACTCTATACCATGCTCCAAAACGGCGTTCGGCAC  
AGGTTTTT

AAGTAAACAATATGTTTTTCATACGTGATTTGAAGTTTTTAAGTATCTGAAATACATACGCGCGCGTATGC  
ATATGTATTAGTTAAATTACTCGAATGTCCTTTATATAATATTACATTTTTTACACACACATTCTTGAAGAA  
GAAATCCC

AGCATGTAGTCAACAAAAAGGGAGTAAACATGCAGTGGCTCTATATATATAAATTATCGTAGAATAATTCA  
AAAAAATAAAAAACGAAAAATTCATTCTTCATCACTCATCAAAGGCACTATTTTCGTACATAACGCGGAG  
GCTCGTTA

CGCCAAAAAATAAAAAAAGGAAATGGGAGAAAAGTTTTTCAGCGCGGAACTCGCGAAAAAATTCCT  
CTTTAGCAATGGTGACATATAGATCTCAAGGTTCTCAATTTAAAGACCTTCTTTGTAGCTTTTGTGTGAT  
TTTTCTGG

AAGGTGCACCCACTTGTACATAAAATTGTACATATATATATATATATATATATATATATATATATATATATAT  
ATATTACCTGCAAGCAATTGCACGCGAGTACTCTGCGTGAGTCAAAGACTGTGGTAAAATGGTACCCA  
TCTGATGC

TTCATATTCATATTCGGTTATTTTTTTTTTTTTTTTTATATTTTTTTTTCAATGGTGTTTTTGATGGTTTTTAT  
TATATATATATATTTTTTTATCTTTTATCTTGTGTAAGCACCCCTCATTACTTGTATCGTGCATATACAA  
ATACCAA

TTTAGGGTGGTAATTTAAAGCATATTCATCATAATAAAAAAAAAAAAAAGAGAATTATTAGGAAAAATAAA  
AACAAAATAATATATAATATATGATGTAGAAAAAATCTTGAAATTTTTATCGATTGGAATAAAATGGAAT  
TTAAAAA

TGAAGTTTTTAAGTATCTGAAATACATACGCGCGCGTATGCATATGTATTAGTTAAATTAATCTCGAATGTCC  
TTTATATAATATTACATTTTTTACACACACATTCTTGAAGAAGAAATCCCGATCGTAAAAAAGAACCCGTC  
CTCCAAAT



TAATCTTGAGCAAATTGATCCTACATAAATCATGTGACTTATTTATTTAATTATTATTAAGTAAAAAGAT  
TTTCTATTTAAATTTATTAATTAATTTTTTTTTCTTAAATAATTATTTTATGTTTTTGTTCGGAAAAAGA  
AAAATATT

TGATCAAAAAAAAAAAGGAAAATCAAGCGCGGGTAATAACGGCACCATTAAATACTAGTAGTACTATATAG  
ATGGTATAAAGAAATGATTTAAAACAATACGATTATATGATATTTATACATCTGTTTCAGTTGAGCTTTTT  
TTCCATAG

ATAAAATAAAATAAAAAAAAAAAAAAAAAAAAAAAAAAAGAACCTTTTGTTCGCCAGTATATGGGTAAATT  
AACGGTTCCTTTTATTAGTCATTTTCAACTCTATACCATGCTCCAAAACGGCGTTCGGCACAGGTTTTTTA  
TTTTACCA

ACGGCGAAAGTGAAAGGTGCAAGTGGAAGAAAGGAAGGCTAAAGCAAAGTGTTCCTTATATATAATTTT  
ATGTACCAGAGGAAGCAAAGTACGAAAACATCAGTTGAAATCCAAAAAAAAAAGTTACGCGTTTCGCGT  
TTTGGTGC

TATTCGGTTATTTTTTTTTTTTTTATATTTTTTTTCAATGGTGTTCCTTATATATATA  
TATTTTTTTATCTTTTATCTTGTGTAAGCACCCCTCATTACTTGTATCGTGCATATACAAATACCAAACA  
AACTCTAT

GAAAAGGAAGAGCAATCCTGCTAAAGCTTTTATATCTAAACGCCAAAAAATAAAAAAAAAAAGGAAATGGG  
AGAAAAGTTTTTCAGCGCGGAACTCGCGAAAAAATTCCTCTTTAGCAATGGTGACATATAGATCTCAAGG  
TTCTCAAT

TGCCTGAAACTTTTTCGACCTTAGAATGGCAGAAAAATGGCAAATACTGTAAAATACTTAACATTTAACTA  
AATTTTATTCTATGCTTTTCTCTCGATGAGATGAGCTGTGAAAAATTTGAAAAAAAAAAAAAAAAAAAA  
AAAAAAA

TTACCAAAAAAAGTTCATCTTTCTTATTTTTAAAATCGATAGTTCTTCAGGATCTTGGTCACATATATAT  
ATATATATATATATACACTTATATAAAATAAGACGTTTATTTAATCTTGTTCCTTACGAGTTTCTTTTTT  
TTTTTTTT

ATTAAGAGAAAAAATTCGATTATAAAATAGTACAATGTCCAGAAGCTTGGTTTTTAATAGTATATAATA  
AAGATAAAGATAGATAGAGAACATAACTCTAAACTTTAAGAGTGAATTTTTTTTTTTTTTAGTTTAGTTTTT  
TTTTTTTT

AATATATTCATCGTCATATACGGAACATTCAGTTATACGCGAAAGTAAAAGTGAGAGCTTTTCAGGGTTA  
AAAGCTGGGCGTGTTCATGACGTATTTACCGAGGTCGTATTATCAAAGAAAATGAAAAAAAAAAAAAAAA  
AAAAAAA

AAAAAAAAAGAGAATTATTAGGAAAAATAAAAACAAATAATATATAATATATGATGTAGAAAAAATCTT  
GAAATTTTTATCGATTCGAATAAAATGGAATTTAAAAAGTGGGAAAGAAACAATGAGAATTCATAGGATA  
TAATGAAA

TATCAGAATTAGAGCCTTAAAAAAGCCGCAAGACAGGTTAAAAAGGAATAGAATTATCGTTCTCGAGATA  
GTTTTTATACAATACATATATATATATATATATATATATATTTACAAGAAAAGCATGGCTTATGTATTATACT  
TGCTTATG

ACATTTAACTAAATTTTATTCTATGCTTTTCTCTCGATGAGATGAGCTGTGAAAAATTTGAAAAAAAA  
AAAAAAAAAAAAAAAAAAAAATTTGTTATACCAATAACGAGAAACCTAACTCTAAACTTAGGGTCAAA  
GAACAGAA

AAAGTTCATCTTTCTTATTTTTAAAATCGATAGTTCTTCAGGATCTTGGTCACATATATATATATATATAT  
ATATACACTTATATAAAATAAGACGTTTATTTAATCTTGTTCCTTACGAGTTTCTTTTTTTTTCTTTTTT  
TATTTTCT

GGTTTTTAATAGTATATAATAAAGATAAAGATAGATAGAGAACATAACTCTAAACTTTAAGAGTGAATTTT  
TTTTTTTTTAGTTTAGTTTTTTTTTTTTTTTTTTTTTTTTTTTACAATAATGTATTGTTCTTGAAAATAACACAATC  
TGTTCAA

TTAGAATGGCAGAAAAATGGCAAATACTGTAAAATACTTAACTTTAACTAAATTTTATTCTATGCTTTTC  
CTCTCGATGAGATGAGCTGTGAAAAATTTTGAAAAAAAAAAAAAAAAAAAAAAAAAAAAAAAAAATTTGTTATC  
ACCAATAA

TTTTTGACAAGAGAACGTTCTGAAGCCAGTTTATTCTTGCCATCCGTGTACGCTAGGAGAGGATTATTAA  
AATAAGTGATATATACATATATATATATATATATATATAATACACTAATTATTTTATGTGATGTTGA  
TCACGCGA

GACCTTATAACACAACCTTCTTAGTATGGAAGTAATACATATATACATATATACATATATACATACATATA  
TATATATATATATATATATATACATCTTTTGAACCAATTCCCTATAGACTTGGTTGTAATTCGTTAGAAAG  
ATTTTCAT

CTTCGATGCATTTAGATAATTTTTGGAAACATTTTTTTTTCTTGATGTATATTTTTGTATTGTAGAAATCG  
CGCGTACTGTACTTGTATATCGCTTTATAAGCGCTTTAATTGATTGTTTCATGACGAGGATAGGCGGATAG  
GCGGAGGT

CTAATTTAAATAGCATGTAGTCAACAAAAAGGGAGTAAACATGCAGTGGCTCTATATATATAATTATCGTA  
GAATAATTCAAAAAAAAATAAAAAACGAAAAATTCATTCTTCATCACTCATCAAAGGCACTATTTTCGTCA  
TAACGCGG

GTGAGAGCTTTTCAGGGGTAAAAGCTGGGCGTGTTCATGACGTATTTACCGAGGTCGTATTATCAAAGA  
AAATGAAAAAAAAAAAAAAAAAAAAAAAAAGCGAAGAGGAAAAAGACAAACGAAAAACAAAACGAAATAACG  
CATTGTAT

TAACTGTATAGAAACGTTTCGTGGCGGAAAAACTACGTAAAAAGGCGGTATTTATCTATTATTTGGCCAAA  
AAAAAAAAAATACATACTACATATACATATACGCCATAAAAAATCTCTGCATCTATCTTATTTCCCAT  
ATTTGGAC

CGTAGAAGATCAATCAATTGAAGTTAAAAGGAGAAGTAATAATTATAGCATAATATATATTTTATAATGTA  
TAGGCATATTTATTTTTTATTTTTTTTTTATTTTCATGTTCTATTTAATGACGAATCACGAAGAAAATATATCT  
AAGAAAAG

TATTATCTTCCCATGCCGCTCCTGCGTGGGATTCCCTTTATTATAACTTTTAAGGTTTCTACCCACATATA  
TGCAATTTTTATCATGTTTTTCTTTTTTTTTTTTTTTTTTTTTTTTTTCTCTCTTTGTTGTGTTTTCGAGA  
AAAAGTTC

AAAAACATAACTAAATTTAAAGTGCAGCCCAACAATAACCTGAAAAATCTAAATATCTTAGAATTTTTTT  
ATTTTGATTATTATATATTATTATTATTCTTATGGTAAATAATGCCCTACTTTTTCTTCAAGGAAGTGAG  
TTACCACC

TCGGGAAAACCTTTTAAGCAATAATAGATTTTAAGTATGTAATGATACAAATAATAATATATTTATATACG  
CATATATTTACATGTGCATATATGAAAAATAACCTAATTCACGTTACCCACCTTTTTTTTTTAGCCTTTTCT  
TTATTTAT

CAAATACTGTAAAATACTTAACTTTAACTAAATTTTATTCTATGCTTTTCTCTCGATGAGATGAGCTGT  
GAAAAATTTTGAAAAAAAAAAAAAAAAAAAAAAAAAAAAAAAAAATTTGTTATCACCAATAACGAGAACTAA  
CTCTAAAA

AGCTAAGGGGAGCAGTTACGCAACTCCGTGATCGCGGCCACGGGCCGTGCGGCGGCTGTTAATTGAAGAAA  
AAAAAATGAAGAACCACAAGGGGTGATCCATATAGGTGACTAGCATCATCCCCTGCGACGCGCGGCCCGC  
CGGGCCAA

GCACCGTGCTAATAACGCGGGGATCAGCGGTTTCGATCCCGCTAGAGACCATTTTTTTTGAATTCAAATAAC  
GTCGTTTTATTTTTATATAAAAATAAAAATCAAAAAGAATTGCGCAAGCCCAGGAATCGAACCAGGGGGCCCA  
ACGATGGC

CATTACCGTCTGTTTTATTTACTGTCACCTTGATGAGCGACTAAAAAGATAGAACGCGGGTTTTTCGCGCA  
ATGTAACAAAGCTCCAGAAATTTTTTATAAATACTAATGTTATAGCAAAAAAATAAGGACCTTAAAGTCC  
TAAACTAA

TTAAAATCGATAGTTCCTTCAGGATCTTGGTCACATATATATATATATATATATATACACTTATATAAAAATA  
AGACGTTTTATTTAATCTTGTTCCTTACGAGTTTCTTTTTTTTTCTTTTTTATTTTCTACTTTTGAAGG  
AACAGTGA

CTCCTAATGCCTTCGATGCATTTAGATAATTTTTGGAAACATTTTTTTTTCTTGATGTATATTTTTTGTATT  
GTAGAAATCGCGCTACTGTACTTGTATATCGCTTTATAAGCGCTTTAATTGATTGTTTCATGACGAGGAT  
AGGCGGAT

GTATAAAAAGAAATAGACCAATATCAACATCAATTTTTATGTATTTTTTTTTTTTTCTTTTGGTATAGCATTGAT  
ATATTGAAATTTGTATATATTGCTGCGAACACTATTTAAAACAGGTTTTTTTTTTTTATTTTGGCAGTTTGAA  
ACCCTTTC

GTTGGTTAAGGCACCGTGCTAATAACGCGGGGATCAGCGGTTTCGATCCCGCTAGAGACCATTTTTTTTCAA  
TTCAAATAACGTCGTTTTATTTTTTATATAAAAATAAAAATCAAAAAGAATTGCGCAAGCCCAGGAATCGAAC  
CGGGGGCC

ATAATATTGAATATGCACTTTTACTATATTAATATCACGTCACACGACGCACAGTGAGAAGTGAAAAATTT  
TTTTTCAATCTGAAAAAAAAAAAAAAAAAAAAAAAAAATTTATATAAACGAATGGTATCTCCATCACATTT  
CTTTTAGC

GTGAAAAATTTTTTTTCAATCTGAAAAAAAAAAAAAAAAAAAAAAAAAATTTATATAAACGAATGGTATCT  
CCATCACATTTCTTTTAGCCTCGCAACTTGTACTTTTCATCACTTTTCTTGTAATTTAGCAATATCCCAAG  
ACAATCA

TTTATAAGAAACATCATGTGATGACATTTAAAAGTGGGAAAGAATACTACTAATATAAAACTATTTACTG  
GATATTTAGAATTTTTTTTTTTTTCTTCTTTATACGTAAAAGTTGTTCAAAAATTTTCATCGTTTTCTTTTT  
TTATGAAT

GAACTAAAAAATAAAAATGAATATAAGGTACGTCTCCAAAAGAAATGTAAATATAGAAATTTTAAAAAA  
AAAACGAAAAAAAAACATAACTAAATTTAAAGTGCAGCCCAACAATAACCCTGAAAAATCTAAATATCTTAG  
AATTTTTT

AGCAATCCTGCTAAAGCTTTTTATATCTAAACGCCAAAAAATAAAAAAAGGAAATGGGAGAAAAGTTT  
TCAGCGCGGCAACTCGCGAAAAAATTCCTCTTTAGCAATGGTGACATATAGATCTCAAGGTTCTCAATTA  
AAAGACCT

TTTTTAATGTGAACTAAAAAATAAAAATGAATATAAGGTACGTCTCCAAAAGAAATGTAAATATAGAAAT  
TTTTAAAAAAGAAACGAAAAAAAAACATAACTAAATTTAAAGTGCAGCCCAACAATAACCCTGAAAAATCTA  
AATATCTT

AAGGGAAAAAATGATTCAATATGTATATATTTATTCATGTATATGTATTTTGAATTAAAAAAAGCGTTT  
TATAAATACTCAATAAAGCCGTTGTATTTCTTTATTACTATCGAAATTCCTTGCTTTAAACATTTTCGCGCA  
TCGCCGGC

AATAACGCGGGGATCAGCGGTTTCGATCCCGCTAGAGACCATTTTTTTTGAATTCAAATAACGTCGTTTTATT  
TTTTATATAAAAATAAAAATCAAAAAGAATTGCGCAAGCCCAGGAATCGAACCAGGGGGCCCAACGATGGCAA  
CGTTGGAT

AGATGAGCTGTGAAAAATTTTGGAAAAAAAAAAAAAAAAAAAAAAAAAAAAAAAAAAAAAAAAAATTTGTTATCACCAATAAC  
GAGAAACCTAACTCTAAAACCTTAGGGTCAAAGAACAGAACCCTAGGCTTTGTATCCAGTTGAATCACTAAT  
TACGAAAG

AAATACAGAACTACAAAAGGCCAAAAAATAAAAAGAAAAGGTAATAAATTGAATGAATGTAGATATATAA  
ATATCAATAGAAATACGTACGCGGAATTATTTCTCTTTGTAACAAATTGATCAAAAAGCTTTGTATTTTTTT  
TTTTTTTA

CTAAATTTAAAGTGCAGCCCAACAATAACCCTGAAAAATCTAAATATCTTAGAATTTTTTTTATTTTGATTA  
TTATATATTATTATTATTCTTATGGTAAATAATGCCCTACTTTTTCTTCTAAGGAAGTGAGTTACCACCAA  
AATAAGGA

GCATAATATCTTAGATAGATGTCTCAAGAGACTATCCTAAATAATATTGAATATGCACTTTTACTATATTA  
ATATCACGTACACGACGCACAGTGAGAAGTGAAAAATTTTTTTTCAATCTGAAAAAAAAAAAAAAAAAAAA  
AAAAAAT

AAAGAACCCTCAGACTTTTTTACCATCCTTTAGCTTTACCTAATAATAATGAAATTTGTCTAAGTAACATAA  
AAAAAGGAGTAAAGAAAAAAAAAAAAAAAAAATAAGTAAATGAAATAAAATATAAAAAATTTCTTACTACGGTTA  
AAACAAAG

CTATGGATGTGGCTTGAAATATGGATGTCTTGCCTACTTCTACTTCTGGGAAAGGCATTTTTTACTCGATCG  
CGTTAATATATGCATCAAGAAAAATAAAAAATAAACGCGAAGAGCTAAAAAAAAAAAAAGAAACCTACTAT  
AAATAACC

AAAATACTTAACATTTAACTAAATTTTTATTCTATGCTTTTCTCTCGATGAGATGAGCTGTGAAAAATTTT  
GAAAAAAAAAAAAAAAAAAAAAAAAAAAAAAAAAATTTGTTATCACCAATAACGAGAAACCTAACTCTAAAAC  
TAGGGTCA

ACATTAGGTGACGTTTTCTCAGTAAAAATTAACCTTCATCATGATCATTAAATTTTCATATTCATATTCGGTTAT  
TTTTTTTTTTTTTTATATTTTTTTTTCAATGGTGTTTTTGATGGTTTTTATTATATATATATATTTTTTTTTAT  
CTTTTATC

CAAATTGATCCTACATAAATCATGTGACTTATTTATTTAATTATTATTAAGTAAAAAAGATTTTCTATTTA  
AATTTATTAATTAATTTTTTTTTCTTAAATAATTATTTTATGTTTTTGTTTTCCGAAAAAGAAAAATATTTT  
ACAAGAA

AAAAGCTCATCGCATTTTTTTCGGTCCTGATGTTAAAAATTTATTTTCGTTTATTAAAAAAAAAAAAAACATT  
ACTGAAACGTATAAAAGAAAAGTCTTAATCTATAAATATGGTTTTATCATAATTAGACTGTTTTACTCTGT  
CCATTGGT

TTTTGGATCAGTAACCGTTATTTGAGCATAACACAGGTTTTTAAATATATTATTATATATCATGGTATATG  
TGTAATAATTTTTTTGCTGACTGGTTTTGTTTTATTTATTTAGCTTTTTTAAAATTTTACTTTCTTTCTTTGTTA  
ATTTTTTC

TCAGACTTTTTTACCATCCTTTAGCTTTACCTAATAATAATGAAATTTGTCTAAGTAACATAAAAAAAGGAG  
TAAAGAAAAAAAAAAAAAATAAGTAAATGAAATAAAATATAAAAAATTTCTTACTACGGTTTTAAAACAAAGTG  
CTCTTCCG

AATATTATTACATATGCTCATCGGGAAAACCTTTTTAAGCAATAATAGATTTTAAGTATGTAATGATACAAA  
TAATAATATATTTATATACGCATATATTTACATGTGCATATATGAAAAATAACCTAATTCACGTTACCCAC  
CTTTTTTT

GCCTACTGTGTGCAAAGATATGTATTCGCTCGTTTCAGTGTTTTTTTTTAAAAATATGTATAGAATTTGTCATT  
ATCTGCGTTAAAAATAGTTATAAAGTATATACAATAACAATAAATGATAAAGAAATATGCAGTGAAAAGA  
AAAAATTA



TGCAAAGATATGTATTCGCTCGTTCAGTGTTTTTTTTTAAAAATATGTATAGAATTTGTCATTATCTGCGTTA  
AAAAATAGTTATAAAGTATATACAATAACAATAAATGATAAAGAAATATGCAGTGAAAAGAAAAAATTATG  
AAGCTTTT

CTAAAAAGATAGAACGCGGGTTTTTCGCGCAATGTAACAAAGCTCCAGAAATTTTTTATAAATACTAATGT  
TATAGCAAAAAAATAAGGACCTTAAAGTCGTAAACTAAATTGAAAAGCCCAAATCATTCAAATTCATAT  
CGTTGAAC

TAGATTGGTTGATGAAAAATCTTATCATAGGGCACCTTCCAGGTAAAAGATCTACTTACTATTAGTCAGTA  
CGTCCTTTTTTTCATTTGTTTATAATTTTTTTTTTTTTTTTTTTTTTTTTCTCCTCTCAATATTTTAGAAGTAAC  
ATGACAGA

TTTACGTAATTA AAAATCTCCGGGGCTAGCTTTTGCCGGGGAACCCATCCCGAAAAAATTGCAAAAAAAA  
AATAGCCGCCGACCGTTGGTCGCTATTACGGAATGATAGAAAAATAGCCGCGCTGCTCGTCCTGGGTGAC  
CTTTTGTA

TAAAAATCATATTTTAGACTCACTTGCTAGTAAACCGGTTGATGCTATTGTTAATATATAACGACAAATG  
TTCAAGCAATTATATAACCATTTTCTTCCATATTCACCTTAAACGAGGTCGCCTTTATTTTTTTTTTTTTTT  
TTTTTCAG

ATCTATGAAGTATGTCTACCACATAAAAAATGACCTTATAACACAACCTTCTTAGTATGGAAGTAATACATA  
TATACATATATACATATATACATACATATATATATATATATATATATATATATACATCTTTTGAACCAATTCC  
CTATAGAC

TATATCTAAACGCCAAAAAATAAAAAAAGGAAATGGGAGAAAAGTTTTTCAGCGCGGAACTCGCGAA  
AAAACCTCCTCTTTAGCAATGGTGACATATAGATCTCAAGGTTCTCAATTAAGACCTTCTTTGTAGCTT  
TTAGTGTG

TCATCGTATTCATAAAATGCTTACGAACACCGTCATTGATCAAATAGGTTTATAATATTAATATACATTT  
ATATAATCGGCGGTATTTATATCATCAAAAAAGTAGTTTTTTATTTTATTTTTTTCATTACTTTTCACTGT  
CTATGGAT

AGTATATAATAAAGATAAAGATAGATAGAGAACATAACTCTAAACTTTAAGAGTGAATTTTTTTTTTTTTAG  
TTTAGTTTTTTTTTTTTTTTTTTTTTACAATAATGTATTGTTCTTGAAAATAACACAATCTGTTCAAAGT  
GGACAGAA

ATTCATTTTTTCTTCATAGCAATATTTTTTTCTGTCCAAGTTTTATTTTTTTTCCATAATTTCTGATTTAC  
TACCATTGAAAATTATAAAGGAAAAATATTACGCGCTACCATTTAATAAGTAGAAACAACCTAAGTTCTCG  
AATGAGAT

ACATCATGTGATGACATTTAAAAAGTGGGAAAGAATACTACTAATATAAAACTATTTACTGGATATTTAGA  
ATTTTTTTTTTTTTCTTCTTTTATACGTAAAAGTTGTTCAAAAAATTTTCATCGTTTTCTTTTTTTATGAATCT  
TTGATTCT

TATCGCAAACCTAGAGACTGATGCCTTTACGAATGAAATTCATAAACCTTAAGAAATAACGGAAAAA  
AAAAAGCTTTTTTTTTTTTTGATAGTATAAATAGTTGATTATATGTAAGTGTATATTAATATTGTTACTAC  
TGGTCAAT

CTTGAACATTTGGCCCATACGTAGAAGATCAATCAATTGAAGTTAAAAAGGAGAAGTAATAATTATAGCA  
TAATATATATTCATAATGTATAGGCATATTTATTTTTTATTTTTTTTTATTTTCATGTTCTATTTAATGACGA  
ATCACGAA

ATGCAATTTTTATCATGTTTTCTCTTTTTTTTTTTTTTTTTTTTTTTTTCTCCTTTGTTGTGTTTTCGAG  
AAAAAGTTCAATTGTTTAAAGGAATTAAGCAAATTATATATATGCGACTGTTGGTTTCCAGTTCTAATCT  
GTACTCTT

GAAACGTTTCGTGGCGGAAAAAACTACGTAAAAAGGCGGTATTTATCTATTATTTGGCCAAAAAAAAAAAA  
AATACATACTACATATACATATACGCCATAAAAAATCTCTGCATCTATCTTATTTCCATTATTTGGACAA  
ATGCTTAC

ATCTGTCTCCGGTTATATATGTCTAAATAGAATTCGGGTAGCATTTTTATTTTTATCGCTTATAGGAAAAAG  
ATATTTGCATATATATATCTATATATCCTATATACATCTATATAGTTATTGTGTAAGGGGTTTTTATAAGG  
TCCGATAC

CATAAAAAATATCTGTCTCCGGTTATATATGTCTAAATAGAATTCGGGTAGCATTTTTATTTTTATCGCTTA  
TAGGAAAAAGATATTTGCATATATATATCTATATATCCTATATACATCTATATAGTTATTGTGTAAGGGGT  
TTTTATAA

TTTTTTCAATCTGAAAAAAAAAAAAAAAAAAAAAAAAAATTTATATAAACGAATGGTATCTCCATCACATT  
TCTTTTAGCCTCGCAACTTGTACTTTTCATCACTTTTCTTGTAATTTAGCAATATCCCAAGAACAATCATC  
GAAATGTC

TATCATGTTTTCTCTTTTTTTTTTTTTTTTTTTTTTTTTCTCTCTTTGTTGTGTTTTCGAGAAAAAGTTCA  
ATTGTTTTAAAGGAATTAAGCAAATTATATATATGCGACTGTTGGTTTCCAGTTCTAATCTGTACTCTTTT  
TTTTGAAT

AATTACTGGATAACTGTATAGAAACGTTTCGTGGCGGAAAAAACTACGTAAAAAGGCGGTATTTATCTATTA  
TTTGGCCAAAAAAAAAAAAAAAAAATACATACTACATATACATATACGCCATAAAAAATCTCTGCATCTATCTT  
ATTTCCCA

AGTATATATCCAAAGAATACCTTAAATAGAAAAGGAAAGATAATAAATACTAAACACTACTATATATTCAG  
GTAATAACAAAAATTATAACATTTTTTAAACTTTTTTTTTTTTTGAAAGTCCTTCTCGCTTTAGGATTTTTT  
CCCATTAA

TGATGAGCGACTAAAAAGATAGAACGCGGGTTTTTCGCGCAATGTAACAAAGCTCCAGAAATTTTTTATAA  
ATACTAATGTTATAGCAAAAAAATAAGGACCTTAAAGTCGTAAACTAAATTGAAAAGCCCAAATCATTCA  
AATTCTAT

AGGATTATTAATAAAGTATATATACATATATATATATATATATATATAAATACACTAATTATTTTA  
TGTGATGTTGATCACGCGAAACGGTAAACGGCTCTGTTTCGCGCTTTCTTTGTTTACATTTTAGTGAAGTAT  
TGTCAGA

TAAAAGAAAAGGTAATAAATTGAATGAATGTAGATATATAAATATCAATAGAAATACGTACGCGGAATTAT  
TTCTCTTTGTAACAAATTGATCAAAAGCTTTGTATTTTTTTTTTTTTTTAGCTCGGCTGCGCGCTATTACAG  
TAATTACA

TAAGAACATTTTTGCTTCTGGACAGACAGAACACGTAAAAAAGAAACACGAAATTACGACTAACTTTTCGC  
GTAGGGGTAAAATTACCTAATGCGCGTAATTAATAAAAAAAGCACAGCAGTGTAAATTGGAGCAATAGGAG  
AAAATGAC

CGTTTTATTATATTATCTTCCCATGCCGCTCCTGCGTGGGATTCCCTTTATTATAACTTTTTAAGGTTTCTA  
CCCACATATATGCAATTTTTATCATGTTTTTCTTTTTTTTTTTTTTTTTTTTTTTTTCTCTCTTTGTTGT  
GTTTTCGA

GAAAGTAAAAGTGAGAGCTTTTCAGGGGTTAAAAGCTGGGCGTGTTCCATGACGTATTTACCGAGGTCGTA  
TTATCAAAGAAAATGAAAAAAAAAAAAAAAAAAAAAAAAAGCGAAGAGGAAAAAGACAAACGAAAAACAAA  
CGAAATAA

TAAAAGGCAAAAATAAGAATATAATACTTCAGTAATGAGCCTTTTTTATTTCGGTCTTGTTACTTCTTTTTT  
ACTTCATTTTTTTTTTTTTTTTTTTGGATAGTAAATAATGCACTTTTGACTAGATCTTGAGTATTTAGTTGAA  
TTGAAATT

TGAAAAATTTTGAIAAAAAAAAAAAAAAAAAAAAAAAAAAAAAAAAAAAAAAAAAAATTTGTTATCACCAATAACGAGAAACCTA  
ACTCTAAAACCTTAGGGTCAAAGAACAGAACCCTAGGCTTTGTATCCAGTTGAATCACTAATTACGAAAGAA  
TGCTGGTG

TTTTTCTCATTGTTGTTGTATCATTATTAATACTAGTGCATCACCCTTGTCTAAATACCAAACGCAAAA  
TATATATATTCTTACTTCATAACGTTCAAAATAAAGTTTTTAGTTTAAAATAAAATAAAATAAAAAAAAAA  
AAAAAAAA

AAGAAACATCGCGTAATGCAACAGTGAGACACTTGCCGTCATATATAAGTTTTGGATCAGTAACCGTTAT  
TTGAGCATAACACAGTTTTTAAATATATTATTATATATCATGGTATATGTGTAAAATTTTTTTGCTGACT  
GGTTTTGT

TCATTATCATCGTTTTATCGACATTAGGTGACGTTTTCTCAGTAAAAATTAACCTCATCATGATCATTAAAT  
TCATATTCATATTCGTTATTTTTTTTTTTTTTTTTTATTTTTTTTTTCAATGGTGTTTTTGATGGTTTTTATT  
ATATATAT

ATTTTTATTAAAGGGAAAAAATGATTCAATATGTATATATTTATTCATGTATATGTATTTTGAATTA AAA  
AAAAACGTTTTATAAATACTCAATAAAGCCGTTGTATTTCTTTATTACTATCGAAATTCCTTGCTTTAAAC  
ATTTTCGCG

CAATCAATTGAAGTTAAAAGGAGAAGTAATAATTATAGCATAATATATATTCATAATGTATAGGCATATT  
TATTTTTTATTTTTTTTTTATTTTATGTTCTATTTAATGACGAATCACGAAGAAAATATATCTAAGAAAAGAT  
CTTTTGAA

CCTTGATCTTTTTCTTTTTTTTTTTTTTCAATTACGGATTATGCATATATAGGTGGGTATACGTACGTAAAA  
AACAAAAACACACATGTAGACATCTATATACGTTTTAAAAAAGCTTTAGATTCAGATCTTTGGGTTTTACAA  
AAAAAAA

AAGTGGAAGAAAGGAAGGCTAAAGCAAAAGTGTTCCTTATATATAATTTTATGTACCAGAGGAAGCAAAG  
TACGAAAACATCAGTTGAAATCCAAAAAAAAAAGTTACGCGTTTTCGCGTTTTGGTGCGTCGGATGGAGA  
AGAAAAAT

AAGTAATAAAAAAATTGCATTTTTATAAGAAACATCATGTGATGACATTTAAAAGTGGGAAAGAATACTAC  
TAATATAAAACTATTTACTGGATATTTAGAATTTTTTTTTTTTTTCTTCTTTATACGTAAAAGTTGTTCAAAA  
AATTTTAT

ATAATATCATTAATATGTTTTACCAAAAAAAGTTCATCTTTCTTATTTTTTAAAATCGATAGTTCTTTCAG  
GATCTTGGTTCATATATATATATATATATATATATACACTTATATAAAAATAAGACGTTTATTTAATCTTGTT  
TTCTTACG

AAAAAGCCGCAAGACAGGTTAAAAGGAATAGAATTATCGTTCTCGAGATAGTTTTTATAACAATACATATA  
TATATATATATATATATATATTTTACAAGAAAAGCATGGCTTATGTATTATACTTGCTTATGTACCAATATATA  
CATATATG

TTAGATAGATGTCTCAAGAGACTATCCTAAATAATATTGAATATGCACCTTTTACTATATTAATATCACGTC  
ACACGACGCACAGTGAGAAGTGAAAAATTTTTTTTTCAATCTGAAAAAAAAAAAAAAAAAAAAAAAAAATTT  
ATATAAAC

TTGGCCCATACGTAGAAGATCAATCAATTGAAGTTAAAAGGAGAAGTAATAATTATAGCATAATATATAT  
TCATAATGTATAGGCATATTTATTTTTTATTTTTTTTTTATTTTATGTTCTATTTAATGACGAATCACGAAGA  
AAATATAT

ATAGATAGAGAACATAACTCTAAACTTTAAGAGTGAATTTTTTTTTTTTTTAGTTTGTTTTTTTTTTTTTTT  
TTTTTTACAATAATGTATTGTTCTTGGAAAATAACACAATCTGTTCAAAGTGGACAGAAACCCTAAAACAA  
AAATAATA



CGTTTCATCGACATTAGGTGACGTTTCTCAGTAAAAATTAAC TTCATCATGATCATTAAATTTTCATATTCAT  
ATTCGGTTATTTTTTTTTTTTTTTTTTATATTTTTTTTTCAATGGTGTTTTTGATGGTTTTTATTATATATATAT  
ATTTTTTT

ATTAATGCATACATATCATAGTATAAAAAAGAAATAGACCAATATCAACATCAATTTTTATGTATTTTTTTTT  
TCTTTTGGTATAGCATTGATATATTGAAATTTGTATATATTGCTGCGAACACTATTTAAAACAGGTTTTTT  
TTTTATTT

TTTAGATAATTTTTGGAAACATTTTTTTTTCTTGATGTATATTTTTGTATTGTAGAAATCGCGGCTACTGT  
ACTTGTATATCGCTTTATAAGCGCTTTTAATTGATTGTTTCATGACGAGGATAGGCGGATAGGCGGAGGTAT  
GCCTCTTA

TTTTTCGTGCATATATATATATACATATATAATATAAAAACAAAATATCATGAATTTCTATCTAAAGTAGTG  
GGAAAAAATATGTCGTTAAAAATGGGTATAATATCCAAGCAAAGCTTTTGGCTTTTTTTTTCTTGAAATGA  
GTGAAGGG

AAAGATAAAGATAGATAGAGAACATAACTCTAACTTTAAGAGTGAATTTTTTTTTTTTTAGTTTAGTTTTT  
TTTTTTTTTTTTTTTTTACAATAATGTATTGTTCTTGGAAAATAACACAATCTGTTCAAAGTGGACAGAAAC  
CCTAAAAC

TCGTCGATCTAAAAGCTCATCGCATTTTTTTCGGTCCTGATGTTAAAAATTTATTTTCGTTTATTAAAAAAAA  
AAAAAACATTACTGAAACGTATAAAAAGAAAAGTCTTAATCTATAAATATGGTTTTATCATAATTAGACTGT  
TTTACTCT

TGTTGTATTACAGCTACTTCTCCTAATGCCTTCGATGCATTTAGATAATTTTTGGAAACATTTTTTTTTCT  
TGATGTATATTTTTGTATTGTAGAAATCGCGCGTACTGTACTTGTATATCGCTTTATAAGCGCTTTTAAT  
TGATTGTT

CTGAAAAAAAAAAAAAAAAAAAAAAAAAATTTATATAAACGAATGGTATCTCCATCACATTTCTTTTAGCC  
TCGCAACTTGTACTTTTCATCACTTTTCTTGTAAATTTAGCAATATCCCAAGAACAATCATCGAAATGTCCC  
GTCCACAA

AATAAAAATGAATATAAGGTACGTCTCCAAAAGAAATGTAAATATAGAAATTTAAAAAAAAAAACGAAAA  
AAAACATAACTAAATTTAAAGTGCAGCCCAACAATAACCCTGAAAAATCTAAATATCTTAGAATTTTTTTA  
TTTTGATT

AGTACAATGTCCAGAAGCTTGGTTTTTAATAGTATATAATAAAGATAAAGATAGATAGAGAACATAACTCT  
AAACTTTAAGAGTGAATTTTTTTTTTTTTTAGTTTAGTTTTTTTTTTTTTTTTTTTACAATAATGTATTGT  
TCTTGGAA

GGTGTGTATATTTACTTGTGTTAGTTTATAAATAAATTTTATATCACTATATGTGTGGTGAAAAGGAAGA  
GCAATCCTGCTAAAGCTTTTATATCTAAACGCCAAAAAATAAAAAAAAAAAGGAAATGGGAGAAAAGTTTT  
CAGCGCGC

CGTTCAGTGTTTTTTTTTAAAAATATGTATAGAATTTGTCATTATCTGCGTTAAAAAATAGTTATAAAGTATA  
TACAATAACAATAAATGATAAAGAAATATGCAGTGAAAAGAAAAAATTATGAAGCTTTTCCTTTTCAGTGTT  
TTCTACCC

CGCGGAATTATTTCTCTTTGTAACAAATTGATCAAAAGCTTTGTATTTTTTTTTTTTTTTAGCTCGGCTGCG  
CGCTATTACAGTAATTACATGTAAATAAATCTTCCAAAGAATACAAAAGAAGAGCTTACAGTAGCCAGTC  
AAAGTCGC

ATGGCTTCGCTAAGAACATTTTTGCTTCTGGACAGACAGAACACGTAAAAAAAGAAACACGAAATTACGAC  
TAACTTTCGCGTAGGGGTAAAATTACCTAATGCGCGTAATTAAAAAAAAAAAGCACAGCAGTGTAATTTGGA  
GCAATAGG

CCTTTGAATCCTTTTTGATGAAAAAAAAATAGAAAAAAAAAAAAAAAAAAAAAAAAAATGAAAGCAATATCGACTGTAT  
GTATATGCGCACCATAATTTTTCTATTAATAGTTTAAGCATAATTAGTGTACTTACTAAAAATAATGTAAC  
TTTGCTCT

CGGGGCTAGCTTTTGCCGGGGAACCCATCCCGAAAAAATTGCAAAAAAAAAAATAGCCGCCGACCGTTGGT  
CGCTATTCACGGAATGATAGAAAAATAGCCGCGCTGCTCGTCTGGGTGACCTTTTGTATATTGTATAAAG  
ATAAACAT

AAAAAATAGAAAAAAAAAAAAAAAAAAAAAAAAAATGAAAGCAATATCGACTGTATGTATATGCGCACCATAATTT  
TCCTATTAATAGTTTAAGCATAATTAGTGTACTTACTAAAAATAATGTAACCTTTGCTCTTTCACCAATAG  
ATGTTACT

GGAAATGGATTTTATTACTGAAATATGTAGAAATATTTAACTCGATAGATTTGATCATAACATATAATGCA  
AAATATATATATATATATATATATATATATATATATATATATATATATATGTGTGTGTGTGTGTGTGTGTGAAA  
CGTTCTTT

ACATATCATAGTATAAAAAGAAATAGACCAATATCAACATCAATTTTTATGTATTTTTTTTTTTTTTTTTGGTA  
TAGCATTGATATATTGAAATTTGTATATATTGCTGCGAACACTATTTAAACAGGTTTTTTTTTTTTTTTTTTG  
GCAGTTTG

AGATATTGTGTAATCGCCTCAAGTAAACAATATGTTTTTTCATACGTGATTTGAAGTTTTTAAGTATCTGAA  
ATACATACGCGCGGTATGCATATGTATTAGTTAAATTACTCGAATGTCCTTTATATAATATTACATTTTT  
ACACACAC

GGGAAATTTAAAAATGTAACGTTTAGCATTGATAGACATAGAATAAAAAATAAGTAACTATAAAAAAAGGA  
AAAAAAAATTGGGCAAAATAGGGATCATATTATAACTATTTATATACAGATTCGAAATATGAAGAAGAGA  
CTATGAAA

TGTATATTATTAAGGCAAAAATAAGAATATAATACTTCAGTAATGAGCCTTTTTTTATTCGGTCTTGTTA  
CTTCTTTTTTACTTCATTTTTTTTTTTTTTTTTTTGGATAGTAAATAATGCACCTTTTACTAGATCTTGAGTA  
TTTAGTTG

AAAAGCTGGGCGTGTTCATGACGTATTTACCGAGGTCGTATTATCAAAGAAAATGAAAAAAAAAAAAAAAA  
AAAAAAAAAGCGAAGAGGAAAAAGACAAACGAAAAACAAACGAAATAACGCATTGTATGCTGGGGCCTCA  
ATTGAACT

AATACATACGCGCGGTATGCATATGTATTAGTTAAATTACTCGAATGTCCTTTATATAATATTACATTTTT  
TACACACACATTTGAAAGAAGAAATCCCGATCGTAAAAAAAAACCCGTGCTCCAAATGGCCTTCAATCT  
TTTCGAAT

AGGAACCGCAGACATGATGTCCTCTTCTTTCAAATTACTGGATATATATATTATTATTATTGTTACCATTA  
ACGTTATTATTATTAATCTATTACTATTACATTACTTAAAAATAAATATGAAACAACGAAGAACAAAAAGA  
ATTATGAA

AGTAATGAGCCTTTTTTATTCGGTCTTGTTACTTCTTTTTTACTTTCATTTTTTTTTTTTTTTTTTTGGATAGT  
AAATAATGCACCTTTTACTAGATCTTGAGTATTTAGTTGAATTGAAATTAAGATACAGTGTATAAAAAATT  
ATACAAAA

ACTGAATCATTTGTTGCCACTTTTTAATGTGAACTAAAAAATAAAAAATGAATATAAGGTACGTCTCCAAA  
AGAAATGTAAATATAGAAATTTTTAAAAAAAAAAAAACGAAAAAAAAACATAACTAAATTTAAAGTGCAGCCCAA  
CAATAACC

AAAAAAAAGGTTAAGGATAAAGATAAGTAACTAATGGAATATATAAACAATAAGTAAGTAGATACTGT  
AAATAGAACACACGTTTTTTAATTTATTTTTTTTTTACATATCTTAATTTAATATAAATCAAAAAGCCCA  
AGCCTCAA



CCATGCCGCTCCTGCGTGGGATTCCCTTTATTATAACTTTTTAAGGTTTCTACCCACATATATGCAATTTTT  
ATCATGTTTTTCTCTTTTTTTTTTTTTTTTTTTTTTTTTTTTTTTTTTTTTCTCTCTTTGTTGTGTTTTCGAGAAAAAGTTCAA  
TTGTTTAA

ACTTATATGGAGCTAAGGGGAGCAGTTACGCAACTCCGTGATCGCGCGCCACGGGCCGTGCGCGGCTGTTA  
ATTGAAGAAAAAAAAAATGAAGAACCACAAGGGGTGATCCATATAGGTGACTAGCATCATCCCCTGCGACG  
CGCGGCC

AAGAAATGTAAATATAGAAATTTTAAAAAAAAAAACGAAAAAAAAACATAACTAAATTTAAAGTGCAGCCCA  
ACAATAACCCTGAAAAATCTAAATATCTTAGAATTTTTTTTTATTTTGATTATTATATATTATTATTATTCTT  
ATGGTAA

TTCAGGGGTTAAAAGCTGGGCGTGTTCATGACGTATTTACCGAGGTCGTATTATCAAAGAAAATGAAAA  
AAAAAAAAAAAAAAAAAAGCGAAGAGGAAAAAGACAAACGAAAAACAAAACGAAATAACGCATTGTATGC  
TGGGCCT

ACATCTGTTTTTCTTACTCTGTTTTTATTTTGTGGTAACCTTTGAATCCTTTTTGATGAAAAAATAGA  
AAAAAAAAAAAAAAAAAATGAAAGCAATATCGACTGTATGTATATGCGCACCATAATTTTCTTATTAATA  
GTTTAAGC

CAACAAAAGGGAGTAAACATGCAGTGGCTCTATATATATAATTATCGTAGAATAATTCAAAAAAAAAATA  
AAAAACGAAAAAATTCATTCTTCATCACTCATCAAAGGCACTATTTTCGTCATAACGCGGAGGCTCGTTACC  
ATGAGAGA

TAATCGCCTCAAGTAAACAATATGTTTTTCATACGTGATTTGAAGTTTTTAAGTATCTGAAATACATACGC  
GCGCGTATGCATATGTATTAGTTAAATTACTCGAATGTCCTTTATATAATATTACATTTTTTACACACACAT  
TCTTGAAG

TCTTCATAGCAATATTTTTTTCTGTCCAAGTTTTATTTTTTTTTCCATAATTTCTGATTTACTACCATTGAA  
AATTATAAAAGGAAAAATATTACGCGCTACCATTTAATAAGTAGAAACAATAAGTTCTCGAATGAGATGT  
TTGCACTG

GAAATACGTACGCGGAATTATTTCTCTTTGTAACAAATTGATCAAAGCTTTGTATTTTTTTTTTTTTTTAG  
CTCGGCTGCGCGCTATTACAGTAATTACATGTAAATAAACTATTTCAAAGAATACAAAAGAAGAGCTTACA  
GTAGCCAG

ACTGTCACCTTGATGAGCGACTAAAAAGATAGAACGCGGGTTTTTCGCGCAATGTAACAAAGCTCCAGAAA  
TTTTTTATAAATACTAATGTTATAGCAAAAAAATAAGGACCTTAAAGTCGTAAACTAAATTGAAAAGCCC  
AAATCATT

AATATAAGGTACGTCTCCAAAAGAAATGTAAATATAGAAATTTTAAAAAAAAAAACGAAAAAAACATAAC  
TAAATTTAAAGTGCAGCCCAACAATAACCCTGAAAAATCTAAATATCTTAGAATTTTTTTTTATTTTGATTAT  
TATATATT

TTGTTGGTAACCTTTGAATCCTTTTTGATGAAAAAATAGAAAAAATAAGGAAAGCAATA  
TCGACTGTATGTATATGCGCACCATAATTTTCTTATTAATAGTTTAAGCATAATTAGTGTACTTACTAAAA  
ATAATGTA

AAAATTGCATTTTATAAGAAACATCATGTGATGACATTTAAAAAGTGGGAAAGAATACTACTAATATAAAA  
CTATTTACTGGATATTTAGAATTTTTTTTTTTTTCTTCTTTATACGTAAAAGTTGTTCAAAAAATTTTCATCG  
TTTTCTTT

TTAGTATAATATGACAATAAAACATTATTGGGACTGAGAACGATTATATTTAAATTTAGTAAATACATACA  
TAACTACTTATAAAAAAAAAAAGAGAAATTTGCCATTTTCACGAGTATAAGCACAGATTGTACGAAACTAT  
TTCATATA

TCATCAGTTTTAGTAAAAACGAACAAAAACACAATAAAATATAAATCAATATATTTAGGTTTACTGGGTT  
CTTTAACAGTTGTATAATAGTTATTTTTTATTACAAAAATATAGGTTTTAATAAAAAAATAGGGTTCTA  
TTTGTTTT

GTAAAAAGATTTTCTATTTAAATTTATTAATTAATTTTTTTTTCTTAAATAATTATTTTATGTTTTGTTT  
TCCGAAAAAGAAAAATATTTCAACAAGAAGTATCAATATATTTCTTGCAAAAAATTGTTCCACCGAGAATTG  
ACAAAAA

CTTATCATAGGGCACCTTCCAGGTAAAAGATCTACTTACTATTAGTCAGTACGTCCTTTTTTTCATTTGTTT  
ATAATTTTTTTTTTTTTTTTTTTTTTTTTCTCCTCTCAATATTTTAGAAGTAACATGACAGAGCAACACGTTTA  
TTTTCTTA

TGTATTCGCTCGTTCAGTGTTTTTTTTAAAAATATGTATAGAATTTGTCATTATCTGCGTTAAAAAATAGTT  
ATAAAGTATATACAATAACAATAAATGATAAAGAAATATGCAGTGAAAAGAAAAAATTATGAAGCTTTTCC  
TTTCAGTG

AGTGCAGCCCAACAATAACCCTGAAAAATCTAAATATCTTAGAATTTTTTTTTATTTTGATTATTATATATTA  
TTATTATTTCTTATGGTAAATAATGCCCTACTTTTTCTTCTAAGGAAGTGAGTTACCACCAAAATAAGGAAA  
TATCGCCT

CTCAAAAAAAAAAAAAAAAAAATGACACATAGCTGAAGTGATAAACTTACTACACTGGTATAACGCTTATTA  
GAGGAAATCTAATAATAAACTGTTAGCTATAAATAGTATAACAATAACAATGAGCGCTAAAAGTATGACATA  
TTAAACAT

TGGCGAAAAAACTACGTAAAAAGGCGGTATTTATCTATTATTTGGCCAAAAAAAAAAAAAAAAATACATACT  
ACATATACATATACGCCATAAAAAATCTCTGCATCTATCTTATTTCCATTATTTGGACAAATGCTTACGT  
GCTAATGT

TTCTCTTTTTTTTTTTTTTTTTTTTTTTTTCTCTCTTTGTTGTGTTTTCGAGAAAAAGTTCAATTGTTTAAA  
AGGAATTAAGCAAATTATATATATGCGACTGTTGGTTTTCCAGTTCTAATCTGTACTCTTTTTTTTTGAATTT  
GCACTGTT

TACCGTAGAGATTCTTGCAACCTCGCTTAAACTCTCGCTTTTATATAATATTTCTCCTTATTGCGCGCTTC  
GTTGAAAATTTGCTAAACACGGGGTTAAGTTTAAAGTTTACAGGATTTATCCGGAAGTTTTGCGGACCC  
CACACAAT

ATTTTTTGCTCGTTTTATTATATTATCTTCCCATGCCGCTCCTGCGTGGGATTCCCTTTATTATAACTTTT  
AAGGTTTCTACCCACATATATGCAATTTTTATCATGTTTTTCTCTTTTTTTTTTTTTTTTTTTTTTTTTCTC  
TCTTTGTT

ATAAAAAAAAAAGGAAATGGGAGAAAAGTTTTAGCGCGCGAACTCGCGAAAAAATCCTCTTTAGCAAT  
GGTGACATATAGATCTCAAGGTTCTCAATTAAGACCTTCTTTGTAGCTTTTAGTGTGATTTTTCTGGTT  
TGAGAATA

CGCATTTTTTTCGGTCTGATGTTAAAAATTTATTTGTTTTATTAAAAAAAAAAAAAAATTACTGAAACGT  
ATAAAAGAAAAGTCTTAATCTATAAATATGGTTTTATCATAATTAGACTGTTTTACTCTGTCCATTGGTCA  
TTATAAAG

GAGTGAATTTTTTTTTTTAGTTTGTGTTTTTTTTTTTTTTTTTTTTTACAATAATGTATTGTTCTTGAAA  
ATAACACAATCTGTTCAAAGTGGACAGAAACCCTAAAACAAAAATAATAACGGGGAAGGAAAAAATAGCA  
AGTGAAC

TTTTGTATCGAAAAAGATTTTCAGGTTTTAGGTTTTATTTTTGTCTATTTTTAAATATATAATATAATAA  
AAAATAAATTGTGTCTAATATCCATAATTTGTACATTTAGATTATTTCTTTTGGTTCTTTATTCTGACCTA  
TATAGACT

AAATAAACGTTTCACCCTGGCAGATAGGAAACCCTATCTCCCAGTGATAAACTTTAATTTTTTTTTTCGTGCA  
TATATATATATACATATATAATATAAAAACAAAATATCATGAATTTCTATCTAAAGTAGTGGGAAAAAATAT  
GTCGTTAA

TGAATCTTGGTGTGTATTACAGCTACTTCTCCTAATGCCTTCGATGCATTTAGATAATTTTTGGAAACA  
TTTTTTTTCTTGATGTATATTTTTGTATTGTAGAAATCGCGCGTACTGTACTTGTATATCGCTTTATAAG  
CGCTTTTA

GTAACCGTTATTTGAGCATAACACAGGTTTTTAAATATATTATTATATATCATGGTATATGTGTAAAATTT  
TTTTGCTGACTGGTTTTGTTTTATTTATTTAGCTTTTTTAAAATTTTACTTTCTTCTTGTAAATTTTTCTG  
ATTGCTCT

TAAACTTTAAGAGTGAATTTTTTTTTTTTTAGTTTAGTTTTTTTTTTTTTTTTTTTTTACAATAATGTATTG  
TTCTTGGAAAATAACACAATCTGTTCAAAGTGGACAGAAACCCTAAAACAAAATAATAACGGGGAAGGAA  
AAAAATAG

CATTCTCTTTCATTTTCGGTAGTGAGATGGCAGTTCGAGGGGTTTTTTATTCGAGATAGTAACTTCTGGCT  
TTTTCGCTTTTATACAGCACAGCAGAAAAAAGCCGCCGAGGCGCGCGTTCATGCAATGGCTCAGTAA  
CCTCGTGA

CAGTTCGAGGGGTTTTTTATTCGAGATAGTAACTTCTGGCTTTTTCGCTTTTATACAGCACAGCAGAAAAA  
AAAGCCGCCGAGGCGCGCGTTCATGCAATGGCTCAGTAACCTCGTGATAGAAAAAGGGCAACAATATTG  
GGCTATTT

TGTTTTATTTACTGTACCTTGATGAGCGACTAAAAAGATAGAACGCGGGTTTTTCGCGCAATGTAACAAA  
GCTCCAGAAATTTTTTATAAATACTAATGTTATAGCAAAAAAATAAGGACCTTAAAGTCGTAACTAAAT  
TGAAAAGC

TATCGAGTAAGGTAGAAACATCTCTGTGATTAACATCGTACATATAAAATACCATATATAAAAGTATGTGG  
GAAAAGAAGCTTCAAAAAAAAAAAGTAAGTAGTAGTTAAAAATAAAATCTCAAAAGAGGGAAAAA  
AAGAGGGA

TAAAAAAGGAAAAAATAATGGGCAAAATAGGGATCATATTATAACTATTTATATACAGATTCGAAATA  
TGAAGAAGAGACTATGAAAGGTGGTGAATATCAATATTAATAAAAAATCAACAATGATTGAAAAACGG  
TAAAAGAT

CTGAATCTTTTTTCCGGCTGTCCTCTTACAGTTGAGTTACAATATTTTGCCAGAAATATTTACATTTTTT  
TACCCAATCTCTATAATAATTATTTAATTCCTAATCCGCTTCAGGCCGCGGTCGTTGAAGTGTATAGT  
TTATATTC

CATTTTCGGTAGTGAGATGGCAGTTCGAGGGGTTTTTTATTCGAGATAGTAACTTCTGGCTTTTTCGCTTTT  
ATACAGCACAGCAGAAAAAAGCCGCCGAGGCGCGCGTTCATGCAATGGCTCAGTAACCTCGTGATA  
GAAAAAGG

AAGTATCTGAAATACATACGCGCGGTATGCATATGTATTAGTTAAATTAATCGAATGTCTTTATATAAT  
ATTACATTTTTTACACACACATTCTTGAAGAAGAAATCCCGATCGTAAAAAACCACCGTGTCCAAATGG  
CCTTCAAT

TCCATAAATCTATCAGAATTAGAGCCTTAAAAAAGCCGCAAGACAGGTTAAAAAGGAATAGAATTATCGT  
TCTCGAGATAGTTTTTATACAATACATATATATATATATATATATATATTTACAAGAAAAGCATGGCTTAT  
GTATTATA

CTTTTTGATGAAAAAATAGAAAAAATAAATGAAAGCAATATCGACTGTATGTATATGCGC  
ACCATAATTTTCTATTAATAGTTTAAAGCATAATTAGTGTACTTACTAAAAATAATGTAACCTTTGCTCTTT  
GCACCAAT

ATAGTTATCATGTTTCTTATCCCCTCCACTGTAAAGTAAATGTATATTATTTAAAAGGCCAAAAATAAGAATA  
TAATACTTCAGTAATGAGCCTTTTTTATTCGGTCTTGTTACTTCTTTTTTACTTCATTTTTTTTTTTTTTTT  
TTGGATAG

ATATCAACATCAATTTTATGTATTTTTTTTTTCTTTTGGTATAGCATTGATATATTGAAATTTGTATATAT  
TGCTGCGAACACTATTTAAAACAGGTTTTTTTTTATTTTGGCAGTTTGAAACCCTTTCCTCTGATGACTT  
TAGTGTAG

ATTTATTTAATTATTATTAAGTAAAAAAGATTTTCTATTTAAATTTATTAATTAATTTTTTTTTTCTTAAATA  
ATTATTTTATGTTTTTGTTCGGAAAAAGAAAAATATTTCAACAAGAAGTATCAATATATTTCTTGCAAA  
AAATTGTT

ACAGCTACTTCTCCTAATGCCTTCGATGCATTTAGATAATTTTTGGAAACATTTTTTTTTTCTTGATGTATAT  
TTTTTGTATTGTAGAAATCGCGCTACTGTACTTGTATATCGCTTTATAAGCGCTTTTAATTGATTGTTCA  
TGACGAGG

TTCACGAACACCGTCATTGATCAAATAGGTTTATAATATTAATATACATTTATATAATCGGCGGTATTTAT  
ATCATCAAAAAAGTAGTTTTTTATTTTATTTTTTCTACTTTTCACTGTCTATGGATTTTCATTGCTAA  
AGGCATCA

TGAAAGGTGCAAGTGAAAGAAAGGAAGGCTAAAGCAAAAGTGTTTCTTATATATAATTTTTATGTACCAGA  
GGAAGCAAAGTACGAAAATCAGTTGAAATCCAAAAAAGTTACGCGTTTCGCGTTTTGGTGCCT  
CGGATGGA

GTGAAAAGGACGGCGAAAGTGAAAGGTGCAAGTGAAAGAAAGGAAGGCTAAAGCAAAAGTGTTTCTTAT  
ATATAATTTTATGTACCAGAGGAAGCAAAGTACGAAAATCAGTTGAAATCCAAAAAAGTTACG  
CGTTTTCGC

ACCTTAATTTAAAAGAACCCTCAGACTTTTTTACCATCCTTTAGCTTTACCTAATATAATGAAATTTGTCTA  
AGTAACATAAAAAAAGGAGTAAAGAAAAAATAAGTAAATGAAATAAAATATAAAAAATTTCTTA  
CTACGGTT

GTATCTACACTATCGCAAAGTACGAAAGTACGAAAGTACGAAAGTACGAAAGTACGAAAGTACGAAAGTACG  
GAAAAAAGCTTTTTTTTTTTTTTGTATAGTATAAATAGTTGATTATATGTAAGTGTATATTAATA  
TTGTTACT

TCATATAGATACATCTGTTTTTCTTACTCTGTTTTTATTTTGTGGTAACCTTTGAATCCTTTTTGATGA  
AAAAATAGAAAAAATAAATAAATAAATAAATAAATAAATAAATAAATAAATAAATAAATAAATAAATAA  
CCTATTAA

CGGCTGAAATTATGAAAGAAGAAGAACATCACTTTACACGGATCGCACGCCATAATTTTTTTTTTTTT  
TTTTCATATCTTCGACGTTTGCCACTGCCTTCTTTTTTCTTTTCTTTTTTGGCGGCCGGTGGCCAAACGCG  
CCAAAACC

AAAAAAGGAAAATCAAGCGCGGTAATAACGGCACCATTAAATACTAGTAGTACTATATAGATGGTATAAA  
GAAATGATTTAAAACAATACGATTATATGATATTTATACATCTGTTTCAGTTGAGCTTTTTTCCATAGAG  
CTGGTGGT

AGGTCATGAACTGAATCTTTTTTCCGGCTGTCCTTTACAGTTGAGTTACAATATTTTGCCAGAAATATT  
TACATTTTTTTACCCAATCTCTATAATAATTATTTAATTCCTAATCCGCTTCAGGCCCGGGTCTGTTGAA  
GTGCTATA

TATATTTAGGTTTACTGGGTTCTTTAACAGTTGTATAATAGTTATTTTTTATTACAAAAATATAGGTTTTA  
ATAAAAAAATAGGGTTCTATTTGTTTTACATTTATTGATTTGTTTTTCTGGCGATACCCTCGAAAAA  
GCCAGGCC

TCCATCCTTTTGTATCAAAAAAAAAAAGGAAAATCAAGCGCGGGTAATAACGGCACCATTAAATACTAGTAG  
TACTATATAGATGGTATAAAGAAATGATTTAAAACAATACGATTATATGATATTTATACATCTGTTTCAGT  
TGAGCTTT

TTGAAAAACGGTAAAAGATCATAAAAAAGCCCTCCAGGTAATATGTCAATAAGTAAATATACTTTATCGAA  
GGAAAGATCAAAAAAAAAAAAAAAAAAAAAATGCAAACGAACATAGCCAAAGGACCACAATATTAATCTGAC  
AATAAATT

TAACATGCATTCTATAAAAAATTAAAGAGAAAAAAATTCGATTATAAAATAGTACAATGTCCAGAAGCTTG  
GTTTTTAATAGTATATAATAAAGATAAAGATAGATAGAGAACATAACTCTAAACTTTAAGAGTGAATTTTT  
TTTTTTTA

CTTTTTTTTTTTTTTTTTTTTTTTTTTTTTTTTTGTGCTGCAAAGTTTCTTAAAGCCTTCGGGCTTACGAAATCCTT  
TATCGCCGAAAGGGGACCGCTTCGAAAAGTGGATATAAAAACAAGGTATTTATTTTTATAGACAATGACCAA  
ATGACAGG

TACCATCCTTTAGCTTTACCTAATATAATGAAATTTGTCTAAGTAACATAAAAAAAGGAGTAAAGAAAA  
AAAAAATAAGTAAATGAAATAAAATATAAAAAAATCTTACTACGGTTTAAAACAAAGTGCTCTTCCGCT  
AACGTTTC

ACTATCCTAAATAATATTGAATATGCACTTTTACTATATTAATATCACGTACACGACGCACAGTGAGAAG  
TGAAAAATTTTTTTCAATCTGAAAAAAAAAAAAAAAAAAAAAAAAAAAAATTTATATAAACGAATGGTATCTC  
CATCACAT

TATAAATCAATATATTTAGGTTTACTGGGTTCTTTAACAGTTGTATAATAGTTATTTTTTATTACAAAAAT  
ATAGGTTTTAATAAAAAAATAGGGTTCTATTTGTTTTACATTTATTGATTTGTTTTCTGGCGATACC  
CTCGAAAA

TCATTACTAGTTTTAACTGTATTTTTATTAAAGGGAAAAAATGATTCAATATGTATATATTTATTCATGT  
ATATGTATTTTGAATTAAAAAAACGTTTTATAAATACTCAATAAAGCCGTTGTATTTCTTTATTACTA  
TCGAAATT

ACGTCTCCAAAAGAAATGTAAATATAGAAATTTTAAAAAAAAAACGAAAAAAAAACATAACTAAATTTAAA  
GTGCAGCCCAACAATAACCCTGAAAAATCTAAATATCTTAGAATTTTTTTATTTTGATTATTATATATTAT  
TATTATTC

CACACACACAAAAAAGGTTAAGGATAAAGATAAGTAACTAATGGAATATATAAACAAATAAGTAAG  
TAGATACTGTAAATAGAACACACGTTTTTTAATTTATTTTTTTTTTTTACATATCTTAATTTAATATAAATC  
AAAAAGCC

CACAACCTCCTTAGTATGGAAGTAATACATATATACATATATACATATATACATACATATATATATATATA  
TATATATATATACATCTTTTGAACCAATTCCTTATAGACTTGGTTGTAATTCGTTAGAAAGATTTTCATTA  
ATTTTATT

TTTAACTGTATTTTTTATTAAAGGGAAAAAATGATTCAATATGTATATATTTATTCATGTATATGTATTT  
TGAATTAAAAAAACGTTTTATAAATACTCAATAAAGCCGTTGTATTTCTTTATTACTATCGAAATTC  
TGCTTTAA

GTCGTATATTAGGCTCTTTTTCTTTTTCTTTTACCAGACTTGGTTTTTTTTCTCTCTTTAGTAATTGTTTCT  
ATATATGGCTTATCAATTCTATATATTTTTTAACTTGAATATATGAATGACATCTTTAATAATCACATCTC  
GGCAAACG

TAAATCCTATTATATAGATACATCTGTTTTCTTACTCTGTTTTTATTTTGTGGTAACCTTTGAATCC  
TTTTTGATGAAAAAATAGAAAAAATAAATAAATAAATAAATAAATAAATAAATAAATAAATAAATAAATAA  
CCATAATT



TGCCTTTACGAATGAAATTCATAAACCTTAAGAAATAACGGAAAAAAAAAAAAAAAAAGCTTTTTTTTTTTTT  
GATAGTATAAATAGTTGATTATATGTAAGTGTATATTAATATTGTTACTACTGGTCAATCGTGATATTTAT  
GAACAACCT

AGATAAAAAAAAAAACTTTAACATGTCACTTTAAGCATGTATGTAATACGTCTATTAATTATATGTAACCTT  
TTATAACTATTTTTCATTTCTATGTGATCCATTTGCAGTTATGCACCTTTTTTTTTTTTTTCCGAATTGTGCTA  
TGTATATA

GAAGAAAACCAAATCCGGGATGAGTTGAAAGTCAAAAAGACTGTATATATAAATTTCAACTTTTGTAGAA  
GATGCAGAAAAAGAAAATGATATGGTATGCAGAAAAAGAAAATAAACCGCTATTATCCTCGCGGTTTGTCA  
TATAACAG

AGAATTATCGTTCTCGAGATAGTTTTTATAACAATACATATATATATATATATATATATATATATATATTTACAAGAAA  
GCATGGCTTATGTATTATACTTGCTTATGTACCAATATATACATATATGGCCTTATTAGGGCAACAAACGC  
CAAAAATA

TGCTGTTTTCCCGAACTTTGAAACACGATTAACCTTATTAGTACATTAATAATATTCTTTTTATTTTTTTA  
TATACATACATAAGCCTTTAATACCTTTAAAGCGGTAACGACTGCCTCTTGAACCTAAAATTATTCTTTTT  
TTTGGATA

TCTTTTTCTTTTACCAGACTTGGTTTTTTTTCTCTCTTTAGTAATTGTTTCTATATATGGCTTATCAATTCT  
ATATATTTTTTAACTTGAATATATGAATGACATCTTTAATAATCACATCTCGGCAAACGACTGATGAGTTC  
CACCTGCT

GGTTATATATGTCTAAATAGAATTCGGGTAGCATTTTTATTTTTTATCGCTTATAGGAAAAAGATATTTGCAT  
ATATATATCTATATATCCTATATACATCTATATAGTTATTGTGTAAGGGTTTTTATAAGGTCCGATACTT  
ACAGAGAT

TATGAAAGAAGAAGAACATCACTTTACACGGATCGCACGCCATAATTCTTTTTTTTTTTTTTTTTTTCATATC  
TTCGACGTTTGCCACTGCCTTCTCTTTTTCTTTCTTTTTTGGCGGCCGGTGGCCAAACGCGCCAAAACCGA  
AACGCTTA

AAAATCATTACGAGAGAATGATAAATTGTAACAGAATTTATAAATCCTATTCATATAGATACATCTGTTTT  
TCCTTACTCTGTTTTTATTTTTGTTGGTAACCTTTGAATCCTTTTTGATGAAAAAATAGAAAAA  
AAAAA

AATATTTTTTTCTGTCCAAGTTTTATTTTTTTTTCCATAATTTCTGATTTACTACCATTGAAAATTATAAAA  
GGAAAAATATTACGCGCTACCATTTAATAAGTAGAAACAATAAGTTCTCGAATGAGATGTTTGCCTGAT  
ACAGCGAG

AAAATGTAACGTTTAGCATTTGATAGACATAGAATAAAAAATAAGTAACTATAAAAAAAGGAAAAAAAAAAT  
TGGGCAAAATAGGGATCATATTATACTATTTATATACAGATTCGAAATATGAAGAAGAGACTATGAAAGG  
TGGGTGAA

AAATAGACCAATATCAACATCAATTTTTATGTATTTTTTTTTTTTTCTTTTGGTATAGCATTGATATATTGAAAT  
TTGTATATATTGCTGCGAACACTATTTAAAACAGGTTTTTTTTTTTTATTTTGGCAGTTTGAACCTTTTCT  
CTGATGAC

AACATAACTCTAACTTTAAGAGTGAATTTTTTTTTTTTTTAGTTTAGTTTTTTTTTTTTTTTTTTTTTACAA  
TAATGTATTGTTCTTGAAAATAACACAATCTGTTCAAAGTGGACAGAAACCCTAAAACAAAAATAATAAC  
GGGGAAGG

TTTCTTTTTTTTTTTTTTATGGAAAGGACCACTCTTACATAACTAGAATAGCATTAAAGAATCAGATTTAC  
AGATAATGATGTCATTATTAATATATATATATATATATATTGTCCTCCGTTCAAGTCGACAACCAATAAAA  
AATTTAAA

TGATAAGCATATTCAATTTTTCTTCATAGCAATATTTTTTTCTGTCCAAGTTTTATTTTTTTCCATAATT  
TCTGATTTACTACCATTGAAAATTATAAAAGGAAAAATATTACGCGCTACCATTTAATAAGTAGAAACAAC  
TAAGTTCT

ATAACCTAACCTAATTAATAGCATGTAGTCAACAAAAAGGGAGTAAACATGCAGTGGCTCTATATATAT  
AATTATCGTAGAATAATTCAAAAAAAAATAAAAAACGAAAAATTCATTCTTCATCACTCATCAAAGGCAC  
TATTTTCGT

AGTTCCATACGAAACTTTCATCTAATTTACCCGATGCTGGTTTTGTATCGAAAAAGATTTTCAGGTTTTAG  
GTTTTATTTTTTGTCTATTTTTTAAATATATAATATAATAAAAAATAAATTGTGTCTAATATCCATAATTTG  
TACATTTA

TCCTTCCTTTTTGGGTCATAAAATCGCTGGGATGGCCCTTGAAAAATTTTTTTCAGTGAAAAAAAAGAAT  
TTTCGAGAAAAAAAATTAGGAATTGTGCGTGGTCATTCAATACGGAGAATTAAGTAACACGCAACAA  
CTGCATTC

GAAATCAGTAAATAAACGTTTTACCCTGGCAGATAGGAAACCCTATCTCCAGTGATAAACTTTAATTTT  
TTTTCGTGCATATATATATACATATATAATATAAAAAAAAATATCATGAATTTCTATCTAAAGTAGTGG  
GAAAAAT

TTTTTTTTCCCGTAGTACCCTGGATCTGCCTAAATCGCGCTTCAGGAAAACCAGGGACCACCTATTTTTT  
TTATATTTTCATCATCTAAATTAAGTGTATACATATATGGATAAAGTCATTTTTGAGTTTACATAATCGTATG  
TTCGAGAG

AGTGAGATGGCAGTTCGAGGGGTTTTTTATTCGAGATAGTAACTTCTGGCTTTTCGCTTTTATACAGCACA  
GCAGAAAAAAAAGCCGCCGAGGCGCGCGCTTCATGCAATGGCTCAGTAACCTCGTGATAGAAAAAGGC  
ACAATAT

AAACTCTAATCATTACCGTCTGTTTTATTTACTGTACCTTGATGAGCGACTAAAAAGATAGAACGCGGGT  
TTTTCGCGCAATGTAACAAAGCTCCAGAAATTTTTTATAAATACTAATGTTATAGCAAAAAAATAAGGAC  
CTTAAAGT

GAAACTTTCATCTAATTTACCCGATGCTGGTTTTGTATCGAAAAAGATTTTCAGGTTTTAGGTTTTATTTT  
TTGTCTATTTTTTAAATATATAATATAATAAAAAATAAATTGTGTCTAATATCCATAATTTGTACATTTAGA  
TTATTTCT

ATTCTTAGGGTCGACTCCACCATTTCAACTTTAGTATAATATGACAATAAAACATTATTGGGACTGAGAAC  
GATTATATTAATAATAGTAAAATACATACATAACTACTTATAAAAAAAAAGAGAAATTTGCCATTTTCA  
CGAGTATA

ATAATACTTCAGTAATGAGCCTTTTTTATTCGGTCTTGTTACTTCTTTTTTACTTCATTTTTTTTTTTTTT  
TTTGGATAGTAAATAATGCACTTTTTGACTAGATCTTGAGTATTTAGTTGAATTGAAATTAAGATACAGTG  
TATAAAAA

TCCCATTTGCATAATATCATTAAATATGTTTTACCAAAAAAAGTTCATCTTTCTTATTTTTTAAATCGAT  
AGTTCTTCAGGATCTTGGTCACATATATATATATATATATATACACTTATATAAAATAAGACGTTTATT  
TAATCTTG

TTTCACAAGGAGATAAAAAAAAACCTTTAACATGTCACTTTAAGCATGTATGTAATACGTCTATTAATTA  
TATGTAACCTTTTATAACTATTTTCATTTCTATGTGATCCATTTGCAGTTATGCACCTTTTTTTTTTTTCCG  
AATTGTGC

TCGACTCCACCATTTCAACTTTAGTATAATATGACAATAAAACATTATTGGGACTGAGAACGATTATATTA  
AAATTAGTAAAATACATACATAACTACTTATAAAAAAAAAGAGAAATTTGCCATTTTCACGAGTATAAG  
CACAGATT

TAGCTTTACCTAATATAATGAAATTTGTCTAAGTAACATAAAAAAAAAAGGAGTAAAGAAAAAAAAAAAAAAAAATAA  
GTAAATGAAATAAAATATAAAAAAATTCCTACTACGGTTTAAAACAAAGTGCTCTTCCGCTAACGTTTCAA  
GTTTCTAA

TAGTAAAAAACGAACAAAAACACAATAAAATATAAATCAATATATTTAGGTTTACTGGGTTCTTTAACAGT  
TGTATAATAGTTATTTTTTTATTACAAAAATATAGGTTTAAATAAAAAAAAAATAGGGTTCTATTTGTTTAC  
ATTTATTG

ACCTTCTGTTGAGGAATATAGGTTTCTTGGAGTTTTGAAAGTTGTTTTATTTATAATGTTATTATTATTA  
TTATTATTATTATTATTATTATTATTATTATTATTATTATTATTATTATTATTATTATTATTATTATTATTATT  
ATCGTTAT

TCCTAATCCGCTTCAGGCCCGCGGTCGTTGAAGTGCTATAGTTTATATTCAGTACATTGTCTTTAATCTCT  
CAGTATTATTTTATCAATAGTAAATACTTCAAGTCCATCGCACGGCGTGGTGGTGATAAAGGGAAAATGCG  
CGCGGGAT

ATAATAACACTGACATAACGCTATAACGAAACAGCGTAACAAAATACTCTTTACATGGTTTATTTTTATAT  
ATTCATTTAACATTATCAAACTAACATTAAGTCCTTTATTTTATCAAAAACAAACGAAAAAAAAAAAAATGCGA  
GACAAATG

ATGACATTTAAAAAGTGGGAAAGAATACTACTAATATAAAACTATTTACTGGATATTTAGAATTTTTTTTT  
TTTCTTCTTTATACGTAAAAGTTGTTCAAAAAATTTATCGTTTTCTTTTTTTATGAATCTTTGATTCTTG  
TTGAAAAG

TTTCTTCTTTTTTTTACGATTTTTTGTCATGGGCATTTGTGACAATATATATTTTTTATTTCAGTTATATAAAT  
ATACTCTTTTTACAAAAGAAGGCCTAATATTATAGGAAATCAGCATTAAAAACATTATGTATTTCTTTTT  
TCAGCGGC

TTTCACTGCATCCTTCTTTTTGGGTCATAAAATCGCTGGGATGGCCCTTGAAAAATTTTTTTCAGTGAAAA  
AAAAAGAATTTTCGAGAAAAAAAAAAAAATTAGGAATTGTGCGTGGTCATTCAATACGGAGAATTAAGTAA  
CACGCAAC

AAAAGTGGGAAAGAATACTACTAATATAAAACTATTTACTGGATATTTAGAATTTTTTTTTTTTTTTCTTCTTT  
ATACGTAAAAGTTGTTCAAAAAATTTATCGTTTTCTTTTTTTATGAATCTTTGATTCTTGTGAAAAGAA  
TTTTCTAAA

TCAAATGAGCTGATAAGCATATTTCAATTTTTCTTCATAGCAATATTTTTTTCTGTCCAAGTTTTATTTTT  
TTCCATAATTTCTGATTTACTACCATTGAAAATTATAAAAGGAAAAATATTACGCGCTACCATTTAATAAG  
TAGAAACA

CCCTTGTTTTCTTTACGTAATTA AAAATCTCCGGGGCTAGCTTTTGCCGGGGAACCCATCCCGAAAAAATTG  
CAAAAAAAAAAATAGCCGCCGACCGTTGGTGCCTATTCACGGAATGATAGAAAAATAGCCGCGCTGCTCGT  
CCTGGGTG

CCGATGCTGGTTTTGTATCGAAAAAGATTTTCAGGTTTTAGGTTTTATTTTTGTCTATTTTTAAATATAT  
AATATAATAAAAAATAAATTGTGTCTAATATCCATAATTTGTACATTTAGATTATTTCTTTTGGTTCTTTA  
TTCTGACC

TACTTCATTTTTTTTTTTTTTTTTGGATAGTAAATAATGCACTTTTGACTAGATCTTGAGTATTTAGTTGA  
ATTGAAATTAAGATACAGTGTATAAAAAATTATACAAAAATAAAGGAACTTGTATATTGAAAATAGGAT  
TGCCAATA

TAAGTATAAAAAACGAGCGAGAAATTTTTGTTAAAGAATTGATATCATATTTTATAATTTACATAAACTAAAT  
AGGGAAAGAGTAGTATAGCGTGCATAAGTTTTGAAAAAAAAAACTATTCATACACTCATATATACTTTTTAT  
ATGGTCTT

CAATCTTTTATTAACAAGAGGGCGGTTTTCCAATTCTAAAGATGTATAAACAAAAATTCCTTATATAACTTAG  
GCGACACATAATATGCGCTTAAATAACATATAGTGAGTATATTATCAAAAAGCATTCAATTTTTTTTTATTT  
ATTAGTCC

TTTGCTTCTGGACAGACAGAACACGTAAAAAAGAAACACGAAATTACGACTAACTTTTCGCGTAGGGGTAA  
AATTACCTAATGCGCGTAATTAATAAAAAGCACAGCAGTGTAAATTGGAGCAATAGGAGAAAATGACCT  
GTAAAGGA

TTTCTTATGTTTCATCGTATTCATAAAATGCTTACGAACACCGTCATTGATCAAATAGGTTTATAATATTA  
ATATACATTTTATAATCGGCGGTATTTATATCATCAAAAAGTAGTTTTTTTTATTTTATTTTTCATTAC  
TTTTCACT

AATAGCTAATGGAAATGGATTTATTACTGAAATATGTAGAAATATTTAACTCGATAGATTTGATCATAAC  
ATATAATGCAAAATATATATATATATATATATATATATATATATATATATATATATATATATATATATAT  
TGTGTGTGTA

ACTCGTGGTGCTATATACTTTTCGTTAGTTCTGAAATTTTTAGGGTGGTAATTTAAAGCATATTCAATC  
ATAATAAAAAAAAAAAGAGAATTATTAGGAAAAATAAAAACAAATAATATATAATATATATGATGTAGAA  
AAAAATCT

CACGGGAAGTAGGGCCTGCACAAATTTTCGGTTCTTTTTTTTTCTATAGATAATGGTTATATGTTATATTTA  
CGGATATTTTACGTTTACTTTGTAAGAAAGAGCTAAAAAGATGTAAAGATATCACTTCGTTTTTTTTCCCT  
CAAAAAAT

GAGTACTTCTTACTTAACTCCCTGCGCCAATTCTGACTCTTATAATAAATAGCTCGAGACGTAAGTCC  
AAAATTGTAAAAAATAAATAAATAAATAAATAAATAAATAAATAAATAAATAAATAAATAAATAAATAAATAA  
CTTTGCGG

AAAGAGTGCTACTGAATCATTGTGTTGCCACTTTTTAATGTGAACTAAAAAATAAATAAATAAATAAATAA  
CGTCTCCAAAAGAAATGTAAATATAGAAATTTTAAAAAATAAATAAATAAATAAATAAATAAATAAATAA  
TGCAGCCC

AATGAAATTCATAAACCTTAAGAAATAACGGAAAAAAAAAAAAAGCTTTTTTTTTTTTTTGATAGTATAA  
ATAGTTGATTATATGTAAGTGTATATTAATATTGTTACTACTGGTCAATCGTGATATTTATGAACAACCTG  
GCGGAGCA

CTACATAAATCATGTGACTTATTTATTTAATTATTATTAAGTAAAAAGATTTTCTATTTAAATTTATTA  
TTAATTTTTTTTTCTTAAATAATTATTTTATGTTTTTGTTCGAAAAAGAAAAATATTTCAACAAGAAGT  
ATCAATAT

ACGGGCAGCCAAAAATACTGGGTGTTGTATATTTACTTGTGTTAGTTTATAAATAAATTTTATATCACTAT  
ATGTGTGGTAAAAGGAAGAGCAATCCTGCTAAAGCTTTTATATCTAAACGCCAAAAAATAAAAAAAAAA  
GGAAATGG

TCTTGGCCAGTTGGTTAAGGCACCGTGCTAATAACGCGGGATCAGCGGTTTCGATCCCCTAGAGACCAT  
TTTTTTGCAATTCAAATAACGTCGTTTTATTTTTTATATAAAAAATAAATAAATAAATAAATAAATAAATA  
GGAATCGA

TAGAAAAATAAATAACAGAACTACAAAAGGCAAAAAAATAAAAAGAAAGGTAATAAATTGAATGAATGT  
AGATATATAAATATCAATAGAAATACGTACGCGGAATTATTTCTCTTTGTAACAAATTGATCAAAAAGCTTT  
GTATTTTT

TCGTATATACGGAACATTAGTTATACGCGAAAGTAAAGTGAGAGCTTTTCAGGGGTTAAAAGCTGGGC  
GTGTTCCATGACGTTTACCGAGGTCGTATTATCAAAGAAATGAAAAAAAAAAAAAAAAAAAAAAAAAAGC  
GAAGAGGA

TCTTCAATTTTTCTATATGCATTTGAAACAGAAAAAAGATATAAAAAATACCAGCTATAACAAAAATCCAT  
GTAAATAAAATTACTGTATATTTTTTTTATGTAATCTAATCAAAAAAATTCACGTCTAATACTAGTCATAA  
ATGGAGTT

GTGTGCGGCATTTTTTTTTCCCGTAGTACCACTGGATCTGCCTAAATCGCGCTTCAGGAAAACCAGGGACCA  
CCCTATTTTTTTTATATTTTCATCATCTAAATTAAGTGTATACATATATGGATAAAAGTCATTTTGAGTTTACA  
TAATCGTA

GTAAGTTGACTTTTCACTGCATCCTTCCTTTTTGGGTCAAAAATCGCTGGGATGGCCCTTGAAAAATTTTT  
TCAGTGAAAAAAGAATTTTCGAGAAAAAATAAGGAATTGTGCGTGGTCATTCAATACGGAG  
AATTAAGT

TTTTTTAGCTACCTATATTCCACCATAACATCAATCATGCGGTTGCTGGTGTATTTACCAATAATGTTTAA  
TGTATATATATATATATATATATGGGGCCGTATACTTACATATAGTAGATGTCAAGCGTAGGCGCTTCCC  
TGCCGGCT

TGACTTGATAGTGAATTATGAGGATCTAGCGACAACACAGGCAGCGTCATAGTTGATGATCTTTTTTTTT  
TTTTTTTTTTTTTTTTGTGCTGCAAAGTTTCTTAAAGCCTTCGGGCTTACGAAATCCTTTATCGCCGAAA  
GGGGACCG

AGGATCTAGCGACAACACAGGCAGCGTCATAGTTGATGATCTTTTTTTTTTTTTTTTTTTTTTTTTTTTGTG  
CTGCAAAGTTTCTTAAAGCCTTCGGGCTTACGAAATCCTTTATCGCCGAAAGGGGACCGCTTCGAAAAGTG  
GATATAAA

ATAGTAGAACTTTCTTCCTTTTTTTCACGATTTTTTGCATGGGCATTTGTGACAATATATATTTTTTATT  
TTATATAAATAACTCCTTTTTCACAAAAGAAGGCCTAATATTATAGGAAATCAGCATTAAAAACATTATGT  
ATTTCTTT

AAAATAAAAAATAAAACGCGAAGAGCTAAAAAAGAAAACCTACTATAAATAACCGATTAGAATCG  
AGTTTTTGTATTGAAATGGCGGTAATAAGCGTTAAACCTCGACGAAGAGAGAAGATCCTACAGGAGGTAA  
AAACAGCT

CTGGATCTGCCTAAATCGCGCTTCAGGAAAACCAGGGACCACCTATTTTTTTTATATTTTCATCATCTAAAT  
TAAGTGTATACATATATGGATAAAAGTCATTTTGAGTTTACATAATCGTATGTTTCGAGAGAGGTCTTTCA  
AAAAATC

TTCTTACTCTGTTTTTATTTTTGTTGGTAACCTTTGAATCCTTTTTGATGAAAAAATAGAAAAA  
AAAAAATGAAAGCAATATCGACTGTATGTATATGCGCACCATAATTTTCTATTAATAGTTTAAGCAT  
AATTAGTG

CGTTGACTCCATTTTTGCTCGTTTTATTATATTATCTTCCCATGCCGCTCCTGCGTGGGATTCCCTTTAT  
TATAACTTTTAAGTTTTCTACCCACATATATGCAATTTTTTATCATGTTTTTCTTTTTTTTTTTTTTT  
TTTTTTT

TAAATATGTTTTACCAAAAAAAGTTCATCTTTCTTATTTTTAAAATCGATAGTTCTTCAGGATCTTGGTC  
ACATATATATATATATATATACACTTATATAAATAAGACGTTTATTTAATCTTGTTTTCTTACGAG  
TTTCTTTT

AATCGCTGGGATGGCCCTTGAAAAATTTTTTCAGTGAAAAAAGAATTTTCGAGAAAAAATAAAT  
TAGGAATTGTGCGTGGTCATTCAATACGGAGAATTAAGTAACACGCAACAACACTGCATTCTGCCTTAGTTGT  
CTCAAGGC

CTAAATCGCGCTTCAGGAAAACCAGGGACCACCTATTTTTTTTATATTTTCATCATCTAAATTAAGTGTATA  
CATATATGGATAAAAGTCATTTTGAGTTTACATAATCGTATGTTTCGAGAGAGGTCTTTTCAAAAAAATCAA  
GTTATCAA

AAAAAGGAATAGAATTATCGTTCTCGAGATAGTTTTTATAACAATACATATATATATATATATATATATATT  
TACAAGAAAAGCATGGCTTATGTATTATACTTGCTTATGTACCAATATATACATATATGGCCTTATTAGGG  
CAACAAAC

CTATAACGAAACAGCGTAACAAAATACTCTTTACATGGTTTATTTTTATATATTCATTTAACATTATCAAA  
ACTAACATTAAGTCCTTTATTTTATCAAAAACAAACGAAAAAAAAAATGCGAGACAAATGATCCAGTCATTT  
ATTGTCAA

ACATATGTACATATGACATACGTATTAGCCGCTGAGGACGCGGACGTATAAAAGGACAATACTTATATGGA  
GCTAAGGGGAGCAGTTACGCAACTCCGTGATCGCGGCCACGGGCCGTGCGCGGCTGTTAATTGAAGAAAA  
AAAAAATG

CACTTAGCCAATGAGCATGGGTTGCAGATAACTCATACCGAAAACATAATGACTTGATAGTGAATTATGA  
GGATCTAGCGACAACACAGGCAGCGTCATAGTTGATGATCTTTTTTTTTTTTTTTTTTTTTTTTTTTTTTGTGC  
TGCAAAGT

CATTTCAACTTTAGTATAATATGACAATAAAACATTATTGGGACTGAGAACGATTATATTTAAAATTAGTAA  
AATACATACATAACTACTTATAAAAAAAAAAAGAGAAATTTGCCATTTTCACGAGTATAAGCACAGATTGT  
ACGAAACT

TTTTGAAACATTTTTTTTTCTTGATGTATATTTTTTGTATTGTAGAAATCGCGGCTACTGTACTTGTATAT  
CGCTTTATAAGCGCTTTTAATTGATTGTTTATGACGAGGATAGGCGGATAGGCGGAGGTATGCCTCTTAAT  
ATTTATAA

GGTGGGTGAATATCAATATTTAAATAAAAATCAAACAATGATTGAAAAACGGTAAAAGATCATAAAAAGCC  
CTCCAGGTAATATGTCAATAAGTAAATATACTTTATCGAAGGAAAGATCAAAAAAAAAAAAAAAAAAAAAAT  
GCAAACGA

GCAAAAACAATATCGAGTAAGGTAGAAACATCTCTGTGATTAACATCGTACATATAAAATACCATATATAA  
AAGTATGTGGGAAAAGAAGCTTCAAAAAAAAAAAGTAAGTAGTAGGTTAAAAATAAAATCTCAAAAGAGGG  
AAAAAAA

ATAAECTTACTCTTCAATTTTTCTATATGCATTTGAAACAGAAAAAAGATATAAAAAATACCAGCTATAAC  
AAAAATCCATGTAAATAAAATTACTGTATATTTTTTTATGTAATCTAATCAAAAAAATTCACGTCTAATA  
CTAGTCAT

AAGAAATAACGGAAAAAAAAAAAAAAAAAGCTTTTTTTTTTTTTGATAGTATAAATAGTTGATTATATGTAAGT  
GTATATTAATATTGTTACTACTGGTCAATCGTGATATTTATGAACAACCTGGCGGAGCAAGGACAAGAATC  
CTCTCTTC

GATGAGACGAAGTATATATCCAAAAGAACCTTAAATAGAAAAGGAAAGATAATAAAATACTAAACACTACT  
ATATATTCAGGTAAAATACAAAATTATAACATTTTTTAAACTTTTTTTTTTTTTGAAAGTCCTTCTCGCTTT  
AGGATTTT

CATGTGACTTATTTATTTAATTATTATTAAGTAAAAAAGATTTTCTATTTAAATTTATTAATTAATTTTTT  
TTCTTAAATAATTATTTTATGTTTTTGTTCGAAAAAGAAAAATATTTCAACAAGAAGTATCAATATAT  
TTCTTGCA

CTGCTAATTGATAGTTATCATGTTTCTTATCCCCTCCACTGTAAAGTAAATGTATATTATTAAGGCAAA  
AATAAGAATATAACTTCAGTAATGAGCCTTTTTTATTCGGTCTTGTTACTTCTTTTTTACTTCATTTTTT  
TTTTTTTT

TATCAATATTAATAAAAATCAAACAATGATTGAAAAACGGTAAAAGATCATAAAAAGCCCTCCAGGTAA  
TATGTCAATAAGTAAATATACTTTATCGAAGGAAAGATCAAAAAAAAAAAAAAAAAAAAAATGCAAACGAAC  
ATAGCCAA

TTTGATTGTAGATTTTCTTTTTCTTTCTTTTTTTTTTTTTTTGACGACTCTGTAATACTCTATTTATTATTT  
AGTTTAGTTTTCTATTTAATATGATGGAATTCATAAAAAAAAAAATACACATAGCCATGCCAGGTAATTG  
CAGATCAA

TGATTTTTGGTAAGGGGACGTTCTAGAAACGTCTACTATTTTGGATGATTTACATAGTTTTAAAATAAAAA  
AGGCTCAATTTTACCTTCCGCGCATTCTATTTTTTTAATCTAAAACCTCAAATCTTACAGTCTCTCCTAG  
CCGCTTTC

TATGCTCAGCTAGATTGGTTGATGAAAAATCTTATCATAGGGCACCTTCCAGGTAAGATCTACTTACTA  
TTAGTCAGTACGTCCTTTTTTCATTTGTTTATAATTTTTTTTTTTTTTTTTTTTTTCTCCTCTCAATATTT  
TAGAAGTA

AATATCAATAGAAATACGTACGCGGAATTATTTCTCTTTGTAACAAATTGATCAAAAGCTTTGTATTTTTT  
TTTTTTTTAGCTCGGCTGCGCGCTATTACAGTAATTACATGTAAATAAACTATTCCAAAGAATACAAAAGA  
AGAGCTTA

TAATGTTGCATCATTACTAGTTTTAACTGTATTTTTATTAAAGGGAAAAAATGATTCAATATGTATATAT  
TTATTCATGTATATGTATTTTGAATTAATAAAAAACGTTTTATAAATACTCAATAAAGCCGTTGTATTTTT  
TTTATTAC

GGTAATAAATTGAATGAATGTAGATATATAAATATCAATAGAAATACGTACGCGGAATTATTTCTCTTTGT  
AACAAATTGATCAAAAGCTTTGTATTTTTTTTTTTTTTTAGCTCGGCTGCGCGCTATTACAGTAATTACATG  
TAAATAAA

TCTTAACGAATAATGTTGCATCATTACTAGTTTTAACTGTATTTTTATTAAAGGGAAAAAATGATTCAAT  
ATGTATATATTTATTCATGTATATGTATTTTGAATTAATAAAAAACGTTTTATAAATACTCAATAAAGCCG  
TTGTATTT

TTCAGCCTGTTCCATCCTTTTTGATCAAAAAAAAAAAGGAAAATCAAGCGCGGGTAATAACGGCACCATTAA  
ATACTAGTAGTACTATATAGATGGTATAAAGAAATGATTTAAAACAATACGATTATATGATATTTATACAT  
CTGTTTCA

AACTACGTAAAAAGGCGGTATTTATCTATTTTGGCCAAAAAAAAAAAAAAAAATACATACTACATATACAT  
ATACGCCATAAAAAATCTCTGCATCTATCTTATTTCCATTATTTGGACAAATGCTTACGTGCTAATGTCC  
TTACCCTC

AACGAGCGAGAAATTTTGTAAAGAATTGATATCATATTTTTATAATTTACATAAACTAAATAGGGAAAGAG  
TAGTATAGCGTGCATAAGTTTGAATAAAAAAACTATTTCATACACTCATATATACTTTTATATGGTCTTTT  
TTATATTC

AAGTTAAGGAGGACTTATGGAATGAATTCCTCTCTTCAATTAACGAAAAGTAAAATATATAGATAAAAAATC  
ACTGCATAGGGAAAAAACTTTAAATTTTAGGTATACTGAAGACAACAAAAAATACATAACTTAAAATAAA  
GGGCATT

TTCCCCTCAGTGTTATTTTTTTTTCACAAAGGAGATAAAAAAAAAAACTTTAACATGTCACTTAAGCATGTA  
TGTAATACGTCTATTAATTATATGTAACTTTTATAACTATTTTCATTTCTATGTGATCCATTTGCAGTTAT  
GCACCTTT

CTTTATATACCAATAGCAGCAACATCCGGCCCTTGTCTTTTACGTAATTAATAATCTCCGGGGCTAGCT  
TTTGCCGGGGAACCCATCCCGAAAAAATTGCAAAAAAAAAAATAGCCGCGACCGTTGGTGCCTATTCACG  
GAATGATA

AATTCGGGTAGCATTTTTATTTTTATCGCTTATAGGAAAAAGATATTTGCATATATATATCTATATATCCTA  
TATACATCTATATAGTTATTGTGTAAGGGTTTTTATAAGGTCCGATACTTACAGAGATTAATTTGTAAT  
AAAAGCAG

GTAAACCGGTTGATGCTATTGTTAATATATAACGACAAATGTTCAAGCAATTATATAACCATTTTCTTCCA  
TATTCACCTTAAACGAGGTCGCCTTTATTTTTTTTTTTTTTTTTTTTTTTTTCAGGGCATCGATCGGCCCGGAGTCG  
TCGCCTTC

ACGGGCCGTGCGCGGCTGTTAATTGAAGAAAAAAAAAATGAAGAACCACAAGGGGTGATCCATATAGGTGA  
CTAGCATCATCCCCTGCGACGCGCGGCCCGCCGGGCCAAAGGCGGGCAATGCGCGCTGCTGATTGGCCTCG  
AGGACAAC

TCTACTTACTATTAGTCAGTACGTCCTTTTTTTCATTTGTTTATAATTTTTTTTTTTTTTTTTTTTTTCTCC  
TCTCAATATTTTGAAGTAACATGACAGAGCAACACGTTTATTTTCTACATATAGTCATAAGTATAAAAA  
CGAGCGAG

GCTGGCTACTACAACGCTAAAAACAATAGCATTAAATAATAGTAATAGTAATAATAATAGTAATAATAATA  
AAAATAATAATAATAATCATAATAATAATAATCTACTCGGTAATGACATCAGTCAGATGGCCTTTTTACTC  
GATTACCC

AATCCAAAAAAAAAAGTTACGCGTTTTGCGTTTTGGTGCCTCGGATGGAGAAGAAAAATGCTAAATAATT  
AGATATTGAAGAATCAGCATAAGTTGTGCGAAAAAGGAAGAGAATACATAAAAAGAAAAAGGATATATAA  
GTAAAAATA

CAATTTTATGTATTTTTTTTTTTCTTTTTGGTATAGCATTGATATATTGAAATTTGTATATATTGCTGCGAAC  
ACTATTTAAACAGGTTTTTTTTTTATTTTGGCAGTTTGAAACCCTTCTCTGATGACTTTAGTGTAGTA  
AATGTAAA

AAATAAAAAATCAAACAATGATTGAAAAACGGTAAAAGATCATAAAAAGCCCTCCAGGTAATATGTCAATA  
AGTAAATATACTTTATCGAAGGAAAGATCAAAAAAAAAAAAAAAAAAAAAATGCAAACGAACATAGCCAAAG  
GACCACAA

TATTGATGAGGAATATAAAAAATGTAATTAGGCAAACCTACGCGCGAAAATATAAGAAGCAAAGATATAAAG  
TGTAGTATATTTGAATATTTACATGAACGAAACGGCGACGTATAATGGTAATCGGCTGGGAACTTCATTAA  
AAAGTCAA

CAAAGGGGGGGACCCCTGAGAAAACCTCTCCCGAAAAAAAAAAAAAGAAATATACCCACGCGTTCTTTACCC  
GGAAATAAATATCTTGATTTAGCCGCCGAGATTGTTATATATGCATCCAAGACCTCTGAATGGTGGCTAAT  
TAAGACAC

ATAAAATGGAATTTAAAAAAGTGGGAAAGAAACAATGAGAATTCATAGGATATAATGAAAGGTAAATGCTT  
TAAAAAAAAAATTAAGAGGGGAAAATAAAAAGTAGAAAAGCAAATAAAAAACAAAACATGGAATAAAAGTAACT  
TCAAAAAA

ATGCCTTCTACACTTAGCCAATGAGCATGGGTTGCAGATAACTCATAACGAAAACATAATGACTTGATAG  
TGAATTATGAGGATCTAGCGACAACACAGGCAGCGTCATAGTTGATGATCTTTTTTTTTTTTTTTTTTTTT  
TTTTTTGT

GGTAGAAACATCTCTGTGATTAAACATCGTACATATAAATACCATATATAAAAAGTATGTGGGAAAAGAACG  
TTCAAAAAAAAAAAGTAAGTAGTGGTTAAAAATAAAATCTCAAAAGAGGGAAAAAAAAAAAAAGAGGGATA  
ATTTTGGC

TGGCATCTCTAAAGAGTGCTACTGAATCATTGTTGCCACTTTTTAATGTGAACTAAAAAATAAAAAATGA  
ATATAAGGTACGTCTCCAAAAGAAATGTAATATAGAAATTTTAAAAAAAAAAAAACGAAAAAAAAACATAACT  
AAATTTAA

ATCCTTCGCTTAATATTTGATACGACTTTTTTGGATTTCCATTATTATTATTTGTTACTATTATTATTTATC  
ATTTGGGTTTTCGGTTTTTTGTAATAATTTCTTTTTTTTTTTTTGGCTCTATTTCACTAAGACATCGTATAT  
ATGCCAGG



ACAGAATTTATAAATCCTATTCATATAGATACATCTGTTTTTCTTACTCTGTTTTTATTTTGTGGTAAC  
CTTTGAATCCTTTTTGATGAAAAAATAGAAAAAATGAAAAAATGAAAGCAATATCGACTGTATG  
TATATGCG

ACCCACATATATGCAATTTTTATCATGTTTTTCTCTTTTTTTTTTTTTTTTTTTTTTTTTCTCTCTTTGTTG  
TGTTTTCGAGAAAAAGTTCAATTGTTTTAAAGGAATTAAGCAAATTATATATATGCGACTGTTGGTTTCCA  
GTTCTAAT

TGGGAATCCAGGGAAATTTAAAAATGTAACGTTTAGCATTGATAGACATAGAATAAAAAATAAGTAACTAT  
AAAAAAGGAAAAAATTTGGGCAAATAGGGATCATATTATAACTATTTATATACAGATTCGAAATAT  
GAAGAAGA

TAAAAACAGGAAAAAAGATAGATCTAGAGCTTACGAATCTATTTATTAGTTTCAACGCGCTATATTATTT  
CGCGAGAACCAGTAATTCTCTATTTAAAGCACTCTATTGCCTATCACAAAGTGCTCTGTTGTGTGTTGTT  
TTCAATGT

ACCTATATCCACCATAACATCAATCATGCGGTTGCTGGTGTATTTACCAATAATGTTTAAATGTATATATA  
TATATATATATATGGGGCCGTATACTTACATATAGTAGATGTCAAGCGTAGGCGCTTCCCCTGCCGGCTGT  
GAGGGCGC

AACTTTTGCTACCTTAATTAAGAACCCTCAGACTTTTTACCATCCTTTAGCTTTACCTAATATAATGA  
AATTTGTCTAAGTAACATAAAAAAAGGAGTAAAGAAAAAATAAGTAAATGAAATAAAATATAAA  
AAAATTCT

AGTACATCGCAGGAACCGCAGACATGATGTCCTCTTCTTTCAAATTAAGTATATATATATTATTATTATT  
GTTACCATTAACGTTATTATTATTAACCTATTACTATTACATTAACCTAAAAATAAATATGAAACAACGAAG  
AACAAAA

GAAGAACATCACTTTACACGGATCGCACGCCATAATCTTTTTTTTTTTTTTTTTTTCATATCTTCGACGTTT  
GCCACTGCCTTCTCTTTTTCTTTCTTTTTTGGCGGCCGGTGGCCAAACGCGCCAAAACCGAAACGCTTATA  
AAATGTAG

AGGCTCTTTTTCTTTTTCTTTTACCAGACTTGGTTTTTTTTCTCTCTTTAGTAATTGTTTCTATATATGGCT  
TATCAATTCATATATTTTTTAACTTGAATATATGAATGACATCTTTAATAATCACATCTCGGCAAACGAC  
TGATGAGT

TAAAAACACATAGAAAATAAAAAACAGAACTACAAAAGGCAAAAAAATAAAAAGAAAAGGTAATAAATT  
GAATGAATGTAGATATATAAATATCAATAGAAATACGTACGCGGAATTTTCTCTTTGTAACAAATTGAT  
CAAAAGCT

AACATCCGGCCCTTGTTTTCTTTACGTAATTAAAAAATCTCCGGGGCTAGCTTTTGCCGGGGAACCCATCCC  
GAAAAAATTGCAAAAAAATAGCCGCCGACCGTTGGTGCCTATTCACGGAATGATAGAAAATAGCCG  
CGCTGCTC

GTTGCATCTGTACCGTAGAGATTCTTGCAACCTCGCTTAAACTCTCGCTTTTATATAAATTTTCTCCTTAT  
TGCGCGCTTCGTTGAAAATTCGCTAAACACGGGGTTAAGTTTAAAGTTTACAGGATTTATCCGGAAGTTT  
TCGCGGAC

CCTGCGTGGGATTCCCTTTATTATAACTTTTTAAGGTTTCTACCCACATATATGCAATTTTTATCATGTTTT  
TCTTTTTTTTTTTTTTTTTTTTTTTTTTTTTTCTCTCTTTGTTGTGTTTTTCGAGAAAAAGTTCAATTGTTTAAA  
GGAATTAA

GAACAAAGAAAAGAAACATCGCGTAATGCAACAGTGAGACACTTGCCGTCATATATAAGGTTTTGGATCAG  
TAACCGTTATTTGAGCATAACACAGTTTTTAAATATATTATTATATATCATGGTATATGTGTAATAATTTT  
TTTGCTGA

GTGACGCTAATATTATGTACCGCCCTTCCCCACACACACAAAAAAAAAAGGTTAAGGATAAAGATAAGTAA  
ACTAATGGAATATATAAAACAAATAAGTAAGTAGATACTGTAAATAGAACACACGTTTTTTAATTTATTTTT  
TTTTTTAC

TTATAACTTTTTAAGGTTTCTACCCACATATATGCAATTTTTATCATGTTTTTCTCTTTTTTTTTTTTTTTT  
TTTTTTTTCTCTCTTTGTTGTGTTTTTCGAGAAAAAGTTCAATTGTTTAAAAGGAATTAAGCAAATTATATA  
TATGCGAC

TACACTTCAAACGGTTGGTGAACAAAAAAAAAAAAAGAACCATCCTAAAATACTGTTATTATTACTAAA  
TAGTGCTAAATAATACATATGCCTTGATTTTTATTTCCGAAATTTTTTGTGTTTGTCAATTTAGGCTCTATTA  
GCTTCTTC

TAGTCCAGGTAAGTCTGCTATTTGATTGTAGATTTTTCTTTTTCTTTTTCTTTTTTTTTTTTTTTGACGACTCTG  
TAATACTCTATTTATTATTTAGTTTAGTTTTCTATTTAATATGATGGAATTCATAAAAAAAAAAAAAATACAC  
ATAGCCAT

CCAAGCCAGCTGCTGTTTTCCCGAACTTTGAAACACGATTAACTTATTAGTACATTAATAATATTCTT  
TTATTTTTTATATACATACATAAGCCTTTAATACCTTTAAAGCGGTAACGACTGCCTCTTGAACCTAAAAAT  
TATTCTTT

ATGCATCAAGAAAATAAAAAATAAAACGCGAAGAGCTAAAAAAAAAAAAAGAAAACCTACTATAAATAACCG  
ATTAGAATCGAGTTTTTGTATTGAAATGGCGGTAATAAGCGTTAAACCTCGACGAAGAGAGAAGATCCTAC  
AGGAGGTA

ATAACGATAAGCTGGCTACTACAACGCTAAAAACAATAGCATTAAATAATAGTAATAGTAATAATAATAGT  
AATAATAATAAAAAATAATAATAATAATCATAATAATAATAATCTACTCGGTAATGACATCAGTCAGATGGC  
CTTTTTAC

TTTCTACCCTGTGCTCTTTGTTGGCGGCTTTATTGATGAGGAATATAAAAAATGTAATTAGGCAAACCTACG  
CGCGAAAATATAAGAAGCAAAGATATAAAGTGATAGTATATTTGAATATTTACATGAACGAAACGGCGACGT  
ATAATGGT

AAAATTTTTTTTCATTCATTAACATGTGAAGGCAACATTCATCGATCTCCATCCCTACTGTCAAAAAATATAA  
GTATATATATATATATTTATATAGTCTATATATATATAGTCCCACTCTCAAATAATATAACCTTTTACA  
AACCTGTC

CTTTTTAAGCAATAATAGATTTTAAGTATGTAATGATACAAATAATAATATATTTATATACGCATATATTTA  
CATGTGCATATATGAAAAATAACCTAATTCACGTTACCCACCTTTTTTTTTTAGCCTTTTCTTTATTTATAT  
ATGTATCC

TGTTTTTATTTTGTGGTAACCTTTGAATCCTTTTTGATGAAAAAATAGAAAAAAAAAAAAAAAAAAAAAAT  
GAAAGCAATATCGACTGTATGTATATGCGCACCATAATTTTCTATTAATAGTTTAAAGCATAATTAGTGTA  
CTTACTAA

TCCTACAAGCGCTATAACATATGAAATATACATTAGTTCGAATATTAACCTTTGGGAGGTAATTACAATTCCT  
ATCCGCTTTATATAATTTAGTGGAACCTGGCACGCCGCTCGGAAAAATTGGACTTCAAATTACCCCGCGCGG  
AGATTTGC

ACTCTTCTCATTTTTAAGTTCATTCTTTTCATTTTCGGTAGTGAGATGGCAGTTCGAGGGGTTTTTTTATT  
CGAGATAGTAACTTCTGGCTTTTCGCTTTTATACAGCACAGCAGAAAAAAAAAAGCCGCCGAGGCGCGCGG  
TTCATGCA

TTTCTTTTTTTTTTTCAATTACGGATTATGCATATATAGGTGGGTATACGTACGTAAAAAACAAAAACA  
CACATGTAGACATCTATATACGTTTTAAAAAAGCTTTAGATTTCAGATCTTTGGGTTTTACAAAAAAAACG  
GACAAAAT

CATATAGTCATAAGTATAAAAAACGAGCGAGAAATTTTGTAAAGAATTGATATCATATTTTATAATTTACA  
TAAACTAAATAGGGAAAGAGTAGTATAGCGTGCATAAGTTTGAAAAAAAAAACTATTTCATACACTCATAT  
ATACTTTT

TTGTTGATTGTCATCAGTTTTAGTAAAAACGAACAAAAACACAATAAAATATAAATCAATATATTTAGGT  
TTACTGGGTTCTTTAACAGTTGTATAATAGTTATTTTTTTATTACAAAAATATAGGTTTTAATAAAAAAAAA  
TAGGGTTC

AAAAAGATTTTCAGGTTTTAGGTTTTATTTTTTGTCTATTTTTTAAATATATAATATAATAAAAAATAAATT  
GTGTCTAATATCCATAATTTGTACATTTAGATTATTTCTTTTGGTTCTTTATTCTGACCTATATAGACTAC  
TCAACACA

GGCTTTTCCGCGTATAAGAAATAATAACACTGACATAACGCTATAACGAAACAGCGTAACAAAATACTCTT  
TACATGGTTTTATTTTTATATATTCATTTAACATTATCAAACTAACATTAAGTCCTTTATTTATCAAAACA  
AACGAAAA

AGTCATTGATTACACTTCAAACGGTTGGTGAAACAAAAAAAAAAAAAGAACCATCCTAAAATACTGTTAT  
TATTACTAAATAGTGCTAAATAATACATATGCCTTGATTTTTATTTCCGAAATTTTTTGTGTTTGTCAATTTA  
GGCTCTAT

CCCCTAATTAAGGTGTTTTATATAAECTTACTCTTCAATTTTTCTATATGCATTTGAAACAGAAAAAAGAT  
ATAAAAAATACCAGCTATAACAAAAATCCATGTAAATAAAATTACTGTATATTTTTTTATGTAATCTAATCA  
AAAAAAT

GTTGCCTTTCTTCCCCTCAGTGTTATTTTTTTTCAAGGAGATAAAAAAAAAAACTTTAACATGTCACTT  
TAAGCATGTATGTAATACGTCTATTAATTATATGTAACCTTTTATAACTATTTTCATTTCTATGTGATCCAT  
TTGCAGTT

ACAGACAAAACAACTATCATCTTAACGAATAATGTTGCATCATTACTAGTTTTAACTGTATTTTTATTAA  
AGGGAAAAAATGATTCAATATGTATATATTTATTCATGTATATGTATTTTGAATTAATAAAAAACGTTTT  
ATAAATAC

TAGTTCTTCAGGATCTTGGTCCACATATATATATATATATATATACACTTATATAAAATAAGACGTTTTAT  
TTAATCTTGTGTTTTCTTACGAGTTTCTTTTTTTTTCTTTTTTTATTTTCTACTTTTGCAAGGAACAGTGACC  
TTGCCAAT

ACGGTTGGTGAAACAAAAAAAAAAAAAGAACCATCCTAAAATACTGTTATTATTACTAAATAGTGCTAAA  
TAATACATATGCCTTGATTTTTATTTCCGAAATTTTTTGTGTTTGTCAATTTAGGCTCTATTAGCTTCTTCAT  
CAGGTTCA

ATTCCTTTTATTATAACTTTTTAAGGTTTCTACCCACATATATGCAATTTTTATCATGTTTTTCTTTTTT  
TTTTTTTTTTTTTTTTTCTCTCTTTGTTGTGTTTTTCGAGAAAAAGTTCAATTGTTTAAAGGAATTAAGC  
AAATTATA

TAATATAATGAAATTTGTCTAAGTAACATAAAAAAAGGAGTAAAGAAAAAAAAAAAAATAAGTAAATGAAA  
TAAATATAAAAAAATCTTACTACGGTTTAAACAAAGTGCTCTTCCGCTAACGTTTCAAGTTTCTAAAG  
AATCGTTA

TTGGAACGCGAAAAAACAAAACAGACGCGAGAACGCGACGCGAAAAATATATTTTTCCGTTTTTTTTTTT  
TTTCGGAACAAAGATAACGCGTTAAACCTGTGGATGTAATAAGGATCTGAAACACTGACTAAAACGCGTC  
CTCATTTA

ATTTTGGTCATTGGAACGCGAAAAAACAAAACAGACGCGAGAACGCGACGCGAAAAATATATTTTTCCGT  
TTTTTTTTTTTTTTCGGAACAAAGATAACGCGTTAAACCTGTGGATGTAATAAGGATCTGAAACACTGACT  
AAAACGCG

GTCTCCTTCGTCAAAGACGACCACTTTCCATTTTGGTCATTGGAACGCGAAAAACAAAACAGACGCGAG  
AACGCGACGCGAAAAATATATTTTTCCGTTTTTTTTTTTTTTTTTCGGAACAAAGATAACGCGTTAAACCTG  
TGGATGTA

AGAGGTTTTCGTCTCCTTCGTCAAAGACGACCACTTTCCATTTTGGTCATTGGAACGCGAAAAACAAA  
CAGACGCGAGAACGCGACGCGAAAAATATATTTTTCCGTTTTTTTTTTTTTTTTTCGGAACAAAGATAACGCG  
TTAAACCT

AAAAAACAAAACAGACGCGAGAACGCGACGCGAAAAATATATTTTTCCGTTTTTTTTTTTTTTTTTCGGAACA  
AAGATAACGCGTTAAACCTGTGGATGTAATAAGGATCTGAAACACTGACTAAAACGCGTCCTCATTTAAA  
ATCAAAA

CCACTTTCCATTTTGGTCATTGGAACGCGAAAAACAAAACAGACGCGAGAACGCGACGCGAAAAATAT  
ATTTTTCCGTTTTTTTTTTTTTTTTTCGGAACAAAGATAACGCGTTAAACCTGTGGATGTAATAAGGATCTGA  
AACACTGA

GAAAAAATGGATAAAAAACAAAAAACAACAAAAAACAACAAAAAACAACAAAAAACAACAAAAAACAACAAAA  
ACTTTTAATTTTAAATTATTAGGTTTTTCAATTTTTTATGGTTTTTTGTGTAAAATGCAATGAACGAAT  
CCATTTTT

TCAAAGACGACCACTTTCCATTTTGGTCATTGGAACGCGAAAAACAAAACAGACGCGAGAACGCGACGCG  
GAAAAATATATTTTTCCGTTTTTTTTTTTTTTTTTCGGAACAAAGATAACGCGTTAAACCTGTGGATGTAAT  
AAGGATCT

GATAAAAAACAAAAAACAACAAAAAACAACAAAAAACAACAAAAAACAACAAAAAACAACAAAAAACAACAAAA  
TTTTTAATTATTAGGTTTTTCAATTTTTTATGGTTTTTTGTGTAAAATGCAATGAACGAATCCATTTTTTA  
TTTTGCAA

ACAGACGCGAGAACGCGACGCGAAAAATATATTTTTCCGTTTTTTTTTTTTTTTTTCGGAACAAAGATAACGC  
GTTAAACCTGTGGATGTAATAAGGATCTGAAACACTGACTAAAACGCGTCCTCATTTAAAATCAAAAAAT  
TACTTCTT

TGGAACAAATGAAAAAATGGATAAAAAACAAAAAACAACAAAAAACAACAAAAAACAACAAAAAACAACAAAA  
AGGATGATTAACCTTTAATTTTTTAAATTATTAGGTTTTTCAATTTTTTATGGTTTTTTGTGTAAAATGCA  
ATGAACGA

TTACGCTAAAATAATAGTTTATTTTATTTTTTGAATATTTTTTATTTATATACGTATATATAGACTATTAT  
TTATCTTTTAAATGATTATTAAGATTTTTATTAAAAAAATTCGCTCCTCTTTAATGCCTTTATGCAGTT  
TTTTTTTC

CAAAAAAACAACAAAAAACAACAAAAAACAACAAAAAACAACAAAAAACAACAAAAAACAACAAAAAACAACAAAA  
TTAGGTTTTTCAATTTTTTATGGTTTTTTGTGTAAAATGCAATGAACGAATCCATTTTTTATTTTGAAGT  
GTGAGAGG

ATCGATAGATCAATTTTTTTCTTTTCTTTTCCCATCCTTTACGCTAAAATAATAGTTTATTTTATTTTT  
TGAATATTTTTTATTTATATACGTATATATAGACTATTATTTATCTTTTAAATGATTATTAAGATTTTTTATT  
AAAAAAA

ACGTTTTAGAAAGAGGTTTTCGTCTCCTTCGTCAAAGACGACCACTTTCCATTTTGGTCATTGGAACGCGA  
AAAAACAAAACAGACGCGAGAACGCGACGCGAAAAATATATTTTTCCGTTTTTTTTTTTTTTTTTCGGAACAA  
AGATAACG

CAATTTTTTTCTTTTCTTTTCCCATCCTTTACGCTAAAATAATAGTTTATTTTATTTTTTGAATATTTTT  
TTATTTATATACGTATATATAGACTATTATTTATCTTTTAAATGATTATTAAGATTTTTTATTAAAAAAAT  
TCGCTCCT

ATTAACTGATGGAACAAATGAAAAAATGGATAAAAAACAAAAAAAAAAAAAAAAAAAAA  
GCTTTGCTGGAGGATGATTAACTTTTAATTTTTTTAATTATTAGGTTTTTCAATTTTTTATGTTTTTTGT  
GTAAAATG

GGAATCAAAGATCTATAAATTTTATATTCATGAGCACATGTAGTTTTTTTTTTTTTAGTTTTAAATATAAG  
AAAAAGATAGTATATATATATATATATACATATACATATAAAAAGGAAAGTAAGCTTATACAATACACA  
AATAAATT

ATTGAAAAATAGTACAAATAAGTCACATGATGATATTTGATTTTTATTATATTTTTAAAAAAGTAAAAA  
TAAAAAGTAGTTTTATTTTTAAAAAATAAAATTTAAATATTAGTGTATTTGATTTCCGAAAGTTAAAAAG  
AAATAGTA

GAAAAGAGAAAGGGAACACTTCTAATTTATCTTTAAAATTATATATATATATATATATATATGTGTGTTTG  
TATACTCTGTGGGTATTTCCGTGTATATGGTTAATAATAGTAGTATCTTGTGAGTTTTTTTTATGTTTTTC  
TTCGCGCG

AAATCCCATTAATTAATAAAGAATTGTAACCTTATTTAAAAAATAAGTACATAACAATAAAAAA  
AAAGATAATAATTTTGAATTTATTGCTAGACATTCTTACGTTTATTGTGTTTCATGTTAACAAAAACACATG  
CCCGCGGT

ATCTATAAATTTTATATTCATGAGCACATGTAGTTTTTTTTTTTTTAGTTTTAAATATAAGAAAAAGATA  
GTATATATATATATATATATACATATACATATAAAAAGGAAAGTAAGCTTATACAATACACAAATAAATTCA  
TATCAAAG

TTTTATTATACCCTTTTTTCTCTCTTTACTGTACAGAAGATGCGTCACTAATTCAAAAAAAAAAAAAAAA  
AAAAAATATAAAAAAGAAAGATTTTGGAGAAGCTATATCCTTTTGTGACATACAATAGAGAACTTGTTCC  
TGTTGGTA

CTTTTCTCTTTCCCATCCTTTACGCTAAAATAATAGTTTATTTTTATTTTTGAATATTTTTATTTATAT  
ACGTATATATAGACTATTATTTATCTTTTAATGATTATTAAGATTTTTATTAATAAATAATTCGCTCCTCT  
TTTAATGC

TCCCCATCCTTTACGCTAAAATAATAGTTTATTTTTATTTTTGAATATTTTTATTTATATACGTATATAT  
AGACTATTATTTATCTTTTAATGATTATTAAGATTTTTATTAATAAATAATTCGCTCCTCTTTTAATGCCT  
TTATGCAG

TCTCTTTGATTTAACTGATGGAACAAATGAAAAAATGGATAAAAAACAAAAAAAAAAAAAAAAAAAAA  
AAAAAACAGCTTTGCTGGAGGATGATTAACTTTTAATTTTTTTAATTATTAGGTTTTTCAATTTTTTAT  
GGTTTTTT

ATAATAGTTTATTTTTATTTTTGAATATTTTTATTTATATACGTATATATAGACTATTATTTATCTTTTA  
ATGATTATTAAGATTTTTATTAATAAATAATTCGCTCCTCTTTTAATGCCTTTATGCAGTTTTTTTTTCCC  
ATTCGATA

CTCTCTCCCAACGTTTTAGAAAGGTTTTTCGTCTCCTTCGTCAAAGACGACCACTTTCCCATTTTGGTCAT  
TGGAACGCGAAAAACAAAACAGACGCGGAGACGCGGAAAAATATATTTTTCCGTTTTTTTTTTTTTT  
TTCGGAAC

TTTATATTCATGAGCACATGTAGTTTTTTTTTTTTTAGTTTTAAATATAAGAAAAAGATAGTATATATAT  
ATATATATATACATATACATATAAAAAGGAAAGTAAGCTTATACAATACACAAATAAATTCATATCAAAGAA  
TAATGAAC

AAAGCTATTCATTGAAAAAATAGTACAAATAAGTCACATGATGATATTTGATTTTTATTATATTTTTAAAA  
AAGTAAAAAATAAAAAGTAGTTTTATTTTTAAAAAATAAAATTTAAATATTAGTGTATTTGATTTCCGAA  
GTTAAAAA

CCAGGATAATTTTCAGGACACGTGTTTTCGAAAGGTTTGTTCGCTCCGAAAAAATCAAAAAAACAAAAACG  
GGAAATAACAATAACGACAAAAATGGAAAAAAAAAAAAATTTTAGACGCGGCGCTTGCACCCCGCATTATAA  
GTGGTGTG

GAACGCGACGCGAAAAAATATATTTTTCCGTTTTTTTTTTTTTTTTTCGGAACAAAGATAACGCGTTAAACCT  
GTGGATGTAATAAGGATCTGAAACACTGACTAAAACGCGTCCTCATTTAAAATCAAAAAATTACTTCTTCT  
CCTCCCTT

CGTACGTCATCACTACGGGAAACCAAAAAAAAAAAAAAGAAAAACAGTACAAAAAGGTTTACTTTACCCATA  
GTTAGTATACGTAGATTTTATACACGCACTATTTTTCTTATATACAGGAGATGGGTGGCCACAGAACCCGC  
GCCTAGCC

TAAATCGCATTTCTTTTCGTCCACATTTGCAAACAAAACTTTTCAATAATAATTTTATAAATAGTATCAAT  
ATATATATATATATATATATTTATTTGTTTACTTTTTCTATCAGTGTTCATTTTTTATTAAACAATGT  
TTGATTTT

CACACCTTTATGAGAAGCGAATTTTTTTTTTTTTTTTTGGTTTTAAATATATATATATACATATATATAGATAT  
AGATATACACATGTATAGATGTATTCTAGTTATGCTTATACCTAGAAGTATCAGACCAGATCATACTGG  
TATAGAGC

GAATTGTAACCTTATTTAAAAAATAAGTACATAACAATAAAAAAAGATAATAATTTTGAATT  
TATTGCTAGACATTCTTACGTTTATTGTGTTTATGTTAACAACACATGCCCGCGTTATTATCGCTTT  
TTAATTGC

TAGTTTTTTTTTTTTTAGTTTTAAATATAAGAAAAAGATAGTATATATATATATATATATACATATACAT  
ATAAAAGGAAAGTAAGCTTATACAATACACAAATAAATTCATATCAAAGAATAATGAACCGCAATATTCAG  
AAACACAG

TTTCAGGACACGTGTTTTCGAAAGGTTTGTTCGCTCCGAAAAAATCAAAAAAACAAAAACGGGAAATAACA  
ATAACGACAAAAATGGAAAAAAAAAAAAATTTTAGACGCGGCGCTTGCACCCCGCATTATAAGTGGTGTGCC  
GACGGACG

GGTGAACCTCTCGAGCATAACATTACCTTACGTGTGTTAGTGTACTATATTATATATATATATATATATATAT  
TATAAAGGGAGGAGTTTTTAATTATAATTGTAATTTTCTGATTTTTTTCTGCATTATACAGTTTTTTCCGATT  
TTAAACGA

ATTTTTTATTTTCTCTTTTCGTATTAACTGATGGAACAAATGAAAAAATGGATAAAAAAACAAAAA  
AAAAAACAAAAAAGAGCTTTGCTGGAGGATGATTAACTTTTAATTTTTTTAATTATTAGGTTTTTC  
AATTTTTT

AAATATAAGCTAAATCGCATTTCTTTTCGTCCACATTTGCAAACAAAACTTTTCAATAATAATTTTATAAA  
TAGTATCAATATATATATATATATATATATATTTTTATTTGTTTACTTTTTCTATCAGTGTTCATTTTTTAT  
TAAACAAT

CCTCTGACGAAGGTGGTAGAGAACAAGAAAATGAATAACATTATATCATATTCCTATATATATATATATATAT  
ATATATATATATATATATAACGGTGGAAAATCCCGGCGATATTACAGATAAACATTACACCCGCATGAATGT  
GAGCCACT

CCCTTTTTTTCTCTCTTTACTGTACAGAAGATGCGTCACTAATTCAAAAAAAAAAAAAAAAAAAAAATAT  
AAAAAGAAAGATTTTGGAGAAGCTATATCCTTTTTGTGACATACAATAGAGAACTTGTCTGTTGGTAAG  
ATATCTCA

GCAAAAGATAATAGTGTATCACACCTTTATGAGAAGCGAATTTTTTTTTTTTTTTTTGGTTTTAAATATATAT  
ATATACATATATATAGATATAGATATACACATGTATAGATGTATTCTAGTTATGCTTATACCTAGAAGTGA  
TCAGACCA

GAAAATTGTTCAAAGTTTTTATTTTTATTTTTCTCTTTCTGATTAAACTGATGGAACAAATGAAAAAATGG  
ATAAAAAACAAAAAACAACAAAAAACAACAGCTTTGCTGGAGGATGATTAACTTTTAATTT  
TTTTAATT

AACATATTATCACGTGCAGCCAGGATAATTTTCAGGACACGTGTTTCGAAAGGTTTGTGCTCCGAAAA  
ATCAAAAAACAAAAACGGGAAATAACAATAACGACAAAAATGGAAAAAATTTTAGACGCGG  
GCTTGCAC

CACTACGGGAAACAAAAAAGAAAAACAGTACAAAAAGGTTTACTTTACCCATAGTTAGTATAC  
GTAGATTTTATACACGCACTATTTTTCTTATATACAGGAGATGGGTGGCCACAGAACCCGCGCCTAGCCTA  
TTTTCTTC

GACAATAAAAAGGAATTTGACAGCACAAAAGAGAAAAAATACTATACATAAAATTTTTTACATATGAAT  
TGCTTAGAGTAAAATAGGCATTTTTTCATATCTTCTTCCCAATTATTAATTAGCAAAAAATTGAATAAAAA  
AAGCAGGT

ATTTTTATTTTTGAATATTTTTATTTATATACGTATATATAGACTATTATTTATCTTTAATGATTATTA  
AGATTTTTATTAATAAATTCGCTCCTCTTTAATGCCTTTATGCAGTTTTTTTTTCCATTGATATT  
TCTATGTT

TGAGCACATGTAGTTTTTTTTTTTTAGTTTTAAATATAAGAAAAAGATAGTATATATATATATATAT  
ACATATACATATAAAAGGAAAGTAAGCTTATACAATACACAAATAAATTCATATCAAAGAATAATGAACCG  
CAATATTC

AAGGTTTGTGCTCCGAAAAATCAAAAAACAAAAACGGGAAATAACAATAACGACAAAAATGGAAAA  
AAAAAATTTTAGACGCGGCGCTTGCACCCCGCATTATAAGTGGTGTGCCGACGGACGGTCAACCCCTT  
CAGGGGC

ATTATTGATGCTAATACGGGTTTTTATGAAAAAAGGATAACAACTTATATAAACTTATATAAAAA  
ATATACAATAAATGATCTACAAAGGGTAGGAAATAAAAAATAAGGGAGAAAAAATACATGCGTAAGTA  
CATTAAAA

AGGAATTTGACAGCACAAAAGAGAAAAAATACTATACATAAAATTTTTTACATATGAATTGCTTAGAGT  
AAAATAGGCATTTTTTCATATCTTCTTCCCAATTATTAATTAGCAAAAAATTGAATAAAAAAAGCAGGTGG  
TTTAAGAA

GTACAATGAATTCAAAACATGAAAATTGTTCAAAGTTTTTATTTTTATTTTTCTCTTTCTGATTAAACTGAT  
GGAACAAATGAAAAAATGGATAAAAAACAAAAAACAACAAAAAACAACAGCTTTGCTGGA  
GGATGATT

CCACATTTGCAACAAAACCTTTTCAATAATAATTTTATAAATAGTATCAATATATATATATATATATAT  
TTATTTGTTTACTTTTTCTATCAGTGTTTTCAATTTTTTATTAAACAATGTTTGATTTTTTAAATCGCAAT  
TTAATACC

AATTAAGAAAGAAATTGTAACCTTATTTAAAAAATAAGTACATAACAATAAAAAAAGATAATA  
ATTTTGAATTTATTGCTAGACATTCTTACGTTTATTGTGTTTATGTTAACAACACATGCCCGCGGTTA  
TTATCGCT

TGCTTTCATCCCTCTGACGAAGGTGGTAGAGAACAAGAAATGAATAACATTATATCATATTCCTATATAT  
ATATATATATATATATATATATATATATATATATATATATATATATATATATATATATATATATATAT  
GCATGAAT

TAGTACAAATAAGTCACATGATGATATTTGATTTTATTATATTTTTAAAAAAGTAAAAAATAAAAGTAG  
TTTATTTTTAAAAAATAAATTTAAATATTAGTGTATTTGATTTCCGAAAGTTAAAAAAGAAATAGTAAG  
AAATATAT

ATATTTAATACTAGATGTATATACGTTGTGTGTATGCGCTACTATAGTATAGCTTAACTGTTTTATTATAC  
CCTTTTTTCTCTCTTTACTGTACAGAAGATGCGTCACTAATTCAAAAAAAAAAAAAAAAAAAAAAAAATATA  
AAAAAGAA

ATAGTGTATCACACCTTTATGAGAAGCGAATTTTTTTTTTTTTTTGGTTTTAAATATATATATATACATAT  
ATATAGATATAGATATACACATGTATAGATGTATTCTAGTTATGCTTATACCTAGAACTGATCAGACCAGA  
TCATACCT

CGTGATCGTATCCATTGAGCTTTTTCTTTCTCTCTCTTTTTTTTTTTCTTGTTACATATTCCTATATATAT  
GTATATATATCTATATATATATATATATATATATATATATATATATATATATATATATATATATATATAT  
TTTTTTTT

CTAATACGGGTTTTTTATGAAAAAAAAAAGGATAACAACTTATATAAACTTATATAAAAAACATATACAATA  
AATGATCTACAAAGGGTAGGAAATAAAAAATAAGGGAGAAAAAAAAAATACATGCGTAAGTACATTTAAAT  
ACAGGAAA

TTTAGAGAAGGGAATCAAAGATCTATAAATTTTTATATTCATGAGCACATGTAGTTTTTTTTTTTTTAGTTT  
TAAATATAAGAAAAAAGATAGTATATATATATATATATATATATATATATATATATATATATATATATAT  
ACAATACA

TGATGATAATGTACAATGAATTCAAAACATGAAAATTGTTCAAAGTTTTTATTTTTATTTTTCTCTTTGTA  
TTAAACTGATGGAACAAATGAAAAAATGGATAAAAAAACAAAAAAAAAAAAAAAAAAAAAAAAAAAAAACAG  
CTTTGCTG

CACGTGCAGCCAGGATAATTTTCAGGACACGTGTTTCGAAAGGTTTGTGCTCCGAAAAAATCAAAAAA  
ACAAAAACGGGAAATAACAATAACGACAAAAATGGAAAAAAAAAAAAATTTTAGACGCGGCGCTTGCACCC  
CGCATTAT

TTATTGCTTATGATGATAATGTACAATGAATTCAAAACATGAAAATTGTTCAAAGTTTTTATTTTTATTTT  
CTCTTTGCTATTAACCTGATGGAACAAATGAAAAAATGGATAAAAAAACAAAAAAAAAAAAAAAAAAAAA  
AAAAAAC

CGTGTTCGAAAGGTTTGTGCTCCGAAAAAATCAAAAAAACAAAAACGGGAAATAACAATAACGACAA  
AAATGAAAAAATAAATTTTAGACGCGGCGCTTGCACCCCGCATTATAAGTGGTGTGCCGACGGACGGT  
CAACCCCT

TGTATGCGCTACTATAGTATAGCTTAACTGTTTTATTATACCCTTTTTTTCTCTCTTTACTGTACAGAAGA  
TGCGTCACTAATTCAAAAAAAAAAAAAAAAAAAAAAAAATATAAAAAAGAAAGATTTTGGAGAAGCTATATCC  
TTTTGTGA

TTCAAACATGAAAATTGTTCAAAGTTTTTATTTTTATTTTTCTCTTTGCTATTAACCTGATGGAACAAATG  
AAAAAATGGATAAAAAAACAAAAAAAAAAAAAAAAAAAAAACAACAGCTTTGCTGGAGGATGATTA  
CTTTTAAT

ATGATATTTGATTTTTATTATATTTTTAAAAAAGTAAAAAATAAAAAGTAGTTTATTTTTAAAAAATAAAA  
TTTTAAATATTAGTGTATTTGATTTCCGAAAGTTAAAAAAGAAATAGTAAGAAATATATATTTTCATTGAAT  
GGATATAT

TCACATCATGAAATATAAGCTAAATCGCATTCTTTTTCGTCCACATTTGCAAAACAAAACCTTTTCAATAATA  
ATTTTATAAATAGTATCAATATATATATATATATATATATATATATATATATATATATATATATATATAT  
AATTTTTT

TATATATATATTTATTTGTTTACTTTTTCTATCAGTGTTTTCAATTTTTTATTAAACAATGTTTGATTTTT  
TAAATCGCAATTTAATACCTAAATATAAAAAATGTTATTATATTGCAAAACCCATCAACCTTGAAAAAA  
GTAGAAAC



AAAAAAAAACAAAAAAAAAACAGCTTTGCTGGAGGATGATTAACTTTTAATTTTTTTAATTATTAGGTTTTT  
CAATTTTTTATGGTTTTTTGTGTAAAATGCAATGAACGAATCCATTTTTTATTTTGCAAGTGTGAGAGGCC  
TTTATAAG

ATTTTATTATATTTTTAAAAAAGTAAAAATAAAAAGTAGTTTTATTTTTAAAAAATAAAATTTAAAATAT  
TAGTGTATTTGATTTCCGAAAGTTAAAAAAGAAATAGTAAGAAATATATATTTTCATTGAATGGATATATGA  
AACGTTTA

ATACGTTGTGTGTATGCGCTACTATAGTATAGCTTAACTGTTTTATTATACCCTTTTTTTTCTCTCTTTACT  
GTACAGAAGATGCGTCACTAATTCAAAAAAAAAAAAAAAAAAAAAAAAAATATAAAAAAGAAAGATTTTGGAGA  
AGCTATAT

ACTATAGTATAGCTTAACTGTTTTATTATACCCTTTTTTTTCTCTCTTTACTGTACAGAAGATGCGTCACTA  
ATTCAAAAAAAAAAAAAAAAAAAAAAAAAATATAAAAAAGAAAGATTTTGGAGAAGCTATATCCTTTTGTGACA  
TACAATAG

TTCTTTTCGTCACATTTGCAAACAAAACTTTTCAATAATAATTTTATAAATAGTATCAATATATATATAT  
ATATATATATTTATTTGTTTACTTTTTCTATCAGTGTTCATTTTTTATTAAACAATGTTTGATTTTTT  
AAATCGCA

CTTATTTAAAAAATAAGTACATAACAATAAAAAAAGATAATAATTTTGAATTTATTGCTAGA  
CATTCTTACGTTTATTGTGTTTATGTTAACAAAAACACATGCCCGCGTTATTATCGCTTTTTAATTGCTT  
TCTTAAAA

TCTTGCGTTACTATGGTGGTATTATTGATGCTAATACGGGTTTTTTATGAAAAAAGGATAACAACTT  
ATATAAECTTATATAAAAAACATATACAATAAATGATCTACAAAGGGTAGGAAATAAAAAATAAGGGAGAAA  
AAAAATA

AAGTCACATGATGATATTTGATTTTATTATATTTTTAAAAAAGTAAAAAATAAAAAAGTAGTTTTTTTTA  
AAAAATAAAATTTAAATATTAGTGTATTTGATTTCCGAAAGTTAAAAAAGAAATAGTAAGAAATATATAT  
TTCATTGA

TTGAATTGAAATCGATAGATCAATTTTTTTCTTTTCTTTTCCCATCCTTTACGCTAAAATAATAGTTTA  
TTTTATTTTTTTGAATATTTTTTATTTATATACGTATATATAGACTATTATTTATCTTTTAATGATTATTAA  
GATTTTTTA

TCATATATACTTTTACTGACACCTTTTCGTCACTATTTTTTTGTTTAACTTTTTTTTTGGAAGTACTAAAATT  
ATATGCTCGTAATTATTGAGTATCAAAAAAAAAAAAAAAAAAATGCTGTGACACCCCTTCAATGTGGTG  
TCTATACA

CAGCACAAAAGAGAAAAAATACTATAACATAAAATTTTTTACATATGAATTGCTTAGAGTAAAATAGGCA  
TTTTTCATATCTTCTTCCCAATTATTAATTAGCAAAAATTTGAATAAAAAAAGCAGGTGGTTTTAAGAATT  
GCGCAGGG

ATGTAATTATCTCTCTCCCAACGTTTTTAGAAGAGGTTTTTCGTCTCCTTCGTCAAAGACGACCCTTTCCCA  
TTTTGGTCATTGGAACGCGAAAAACAAAACAGACGCGGAGAACGCGACGCGAAAAAATATATTTTTTCCGTT  
TTTTTTTT

CCGACAGGGTAACATATTATCACGTGCAGCCAGGATAATTTTTCAGGACACGTGTTTCGAAAGGTTTGTGCG  
CTCCGAAAAATCAAAAAAACAAAAACGGGAAATAACAATAACGACAAAAATGAAAAAATAAATTT  
TAGACGCG

GCGCGTACATGATACGAGACGACAAGATATGAAAAGATAATAGTGTATCACACCTTTATGAGAAGCGAA  
TTTTTTTTTTTTTTTTGGTTTTAAATATATATATATACATATATATAGATATAGATATACACATGTATAGATG  
TATTCTAG

CTAGATGTATATACGTTGTGTGTATGCGCTACTATAGTATAGCTTAACTGTTTTATTATACCCTTTTTTTTC  
TCTCTTTACTGTACAGAAGATGCGTCACTAATTCAAAAAAAAAAAAAAAAAAAAAAAAATATAAAAAAGAAAG  
ATTTTTGGA

AAGTCCTAGATAATCATCTTTTGTATTTTTTTTTCTTCCTTTTATTAGTATGTATACATATATATTACTTTT  
TATATTCTTTATAGCGCATTTTTAAACACCTTTCTGAAAAAATGCTGAGATTTTTGATGCTAATCGAAAGAT  
TAAAAAAA

CAAAGTTTTTATTTTTTATTCTCTTTCTGATTAACTGATGGAACAAATGAAAAAATGGATAAAAAAAC  
AAAAAAAAAAAAAAAAAACAAAAAAAAAACAGCTTTGCTGGAGGATGATTAACTTTTAATTTTTTTAATTAT  
TAGGTTTT

AGGTGGTAGAGAACAAGAAAATGAATAACATTATATCATATTCCTATATATATATATATATATATATATAT  
ATCATATAACGGTGGAAAATCCCGGCGATATTACAGATAAACATTACACCCGCATGAATGTGAGCCACTAC  
TATATTAT

AGCCACTTAGACAGAGAGAAAACGAAGTGAGAAGAGGCTAGTATTTTTATATCTTAAAAAAAAAAAAAAAAAC  
AAAAAAAAAAAAAAAAACATAAATATTTGTATCTTATTGCTTATGATGATAATGTACAATGAATTCAAAAATGA  
AAATTGTT

TCGAGCATACATTACCTTACGTGTGTTAGTGTACTATATTATATATATATATATATATATATATAAAGGGA  
GGAGTTTTTAATTATAATTGTAATTTCTGATTTTTTTCTGCATTATACAGTTTTTTCCGATTTTAAACGACT  
TTATTTAA

TAAACATATAAAAAGTACGATTAGTTGGTGTGGTTATATAAGTCATAAAATAATTATCATATTAAAAAATTG  
AAAAATAAAAAACTACTCTTTTTTATTTCAATAGTTCTCGTTATTAGTAGGTCGTCTTTAAAAGATTAC  
CCTTTCAG

AGCTTAACTGTTTTATTATACCCTTTTTTTCTCTTTACTGTACAGAAGATGCGTCACTAATTCAAAAAA  
AAAAAAAAAAAAAAAAAATATAAAAAAGAAAGATTTTGGAGAAGCTATATCCTTTTGTGACATACAATAGAG  
AAACTTGT

AGAGTAGAAAATTTTCATAACGAATCTCTTCTATTCTTATGTACCGTTCCGCCAAATTTTTTCATGAAAAAA  
TTTGGGAAAAAGAAAAAATAGTATATAAAGTAAAAAGATGCGCAAGCCCGGAATCGAACCGG  
GGGCCCAA

GCTCCGAAAAAATCAAAAAAACAAAAACGGGAAATAACAATAACGACAAAAATGGAAAAAATAATTT  
TTAGACGCGGCGCTTGCACCCCGCATTATAAGTGGTGTGCCGACGGACGGTCAACCCCTTTCAGGGGGCCC  
CCTATCTT

GAGAAAAAATACTATACATAAAATTTTTTACATATGAATTGCTTAGAGTAAAATAGGCATTTTTTCATAT  
CTTCTTCCCAATTATTAATTAGCAAAAAATTGAATAAAAAAAGCAGGTGGTTTAAAGAATTGCGCAGGGAG  
AAGAAAGA

ATAATTACTAATATTTAATACTAGATGTATATACGTTGTGTGTATGCGCTACTATAGTATAGCTTAACTGT  
TTTATTATACCCTTTTTTTCTCTTTACTGTACAGAAGATGCGTCACTAATTCAAAAAAAAAAAAAAAAAAAA  
AAAAATA

GGTCTTAGATGACAATAAAAAGGAATTTGACAGCACAAAAGAGAAAAAATACTATACATAAAATTTTTT  
ACATATGAATTGCTTAGAGTAAAATAGGCATTTTTTCATATCTTCTTCCCAATTATTAATTAGCAAAAAAT  
TGAATAAA

AGGGAACACTTCTAATTTATCTTTAAAATTATATATATATATATATATATATATATATATATATATATATATAT  
GGGTATTTCCGTGTATATGGTTAATAATAGTAGTATCTTGTCTAGTTTTTTTTTATGTTTTTTCTTCGCGCGTC  
AACTTTCT

GAAAATAAAAAAGCCAATGAGAACAATATTTTGTGTCGTTTTTTTTATTTTCGCTTCAATTCTCTATACAC  
GTACGTCATCACTACGGGAAACCAAAAAAAAAAAAAAAAAAGAAAACAGTACAAAAAGGTTTACTTTACCCATAG  
TTAGTATA

ATTTTTAAAAAAGTAAAAATAAAAAAGTAGTTTATTTTTAAAAAATAAAATTTAAAATATTAGTGTATTT  
GATTTCCGAAAGTTAAAAAAGAAATAGTAAGAAATATATATTTTCATTGAATGGATATATGAAACGTTTACT  
GGTGGAAG

TCCAATGGTTGGTGAACCTCTCGAGCATAACATTACCTTACGTGTGTTAGTGTACTATATTATATATATATA  
TATGTATATATATAAAGGGAGGAGTTTTTAATTATAAATTGTAATTTTCGTATTTTTTCTGCATTATACAGTT  
TTTTCCGA

AAACAAAACTTTTCAATAATAATTTTATAAATAGTATCAATATATATATATATATATATATATATTTATTTGTTT  
ACTTTTTCTATCAGTGTTCATTTTTTATTAAACAATGTTTGATTTTTTAAATCGCAATTTAATACCTA  
AATATAAA

TTCCATGTTCTCATATATACTTTTACTGACACCTTTTCGTCACTATTTTTTGTTTAACTTTTTTTTTGGAAAG  
TACTAAAATTATATGCTCGTAATTATTGAGTATCAAAAAAAAAAAAAAAAAAATTGCTGTGACACCCCTT  
CAATGTGG

ATCCATTGAGCTTTTTCTTCTCTCTCTTTTTTTTTTCTTGTTACATATTCCTATATATATATGTATATATAT  
CTATATATATATATATATATATATATATATATATATATATATATATATATATATATATATATATATATAT  
GCCTGCG

TTTTTTATGAAAAAAAAAGGATAACAACTTATATAAACTTATATAAAAAACATATAACAATAAATGATCTAC  
AAAGGGTAGGAAATAAAAAATAAGGGAGAAAAAAAAAATACATGCGTAAGTACATTTAAATTTACAGGAAAA  
TCTTACTT

CTTTAAAATTATATATATATATATATATATATATATATATATATATATATATATATATATATATATATATAT  
TTAATAATAGTAGTATCTTGTGCACTTTTTTTTATGTTTTTCTTCGCGCGTCAACTTTCTACCAAGAGAAAA  
ACAATATA

ACCCTACTGCTTTAGAGAAGGGAATCAAAGATCTATAAATTTTATATTCATGAGCACATGTAGTTTTTTTTT  
TTTTTAGTTTTAAATATAAGAAAAAGATAGTATATATATATATATATATATATATATATATATATATATATA  
GTAAGCTT

GACAAGATATGCAAAAGATAATAGTGTATCACACCTTTATGAGAAGCGAATTTTTTTTTTTTTTTGGTTTT  
AAATATATATATATATATATATATATATATATATATATATATATATATATATATATATATATATATATATA  
CTAGAACT

TTTTTTATTTTCGCTTCAATTCTCTATACACGTACGTCATCACTACGGGAAACCAAAAAAAAAAAAAAAAAAGAA  
AACAGTACAAAAAGGTTTACTTTACCCATAGTTAGTATACGTAGATTTTATACACGCACTATTTTTCTTAT  
ATACAGGA

GGAATGGGCGTCCGCTCCACCGTGGTCAAAGACAGGGGCAAAGAGCTCCTAGGTCTATATATATATATCTATA  
TACATATTTATATATATTATTAGAACTTTACAATATAGTATATATACCATTTCATTGTTTAAAGTTTCGGGTAAT  
ACTTTTTT

ACAGAGAGAAAACGAAGTGAGAAGAGGCTAGTATTTTTATATCTTAAAAAAAAAAAAAAAACAAAAAAAAAA  
AAACATAAATATTTGTATCTTATTGCTTATGATGATAATGTACAATGAATTCAAAACATGAAAATTGTTCA  
AAGTTTTT

GTGTAAAATAGAAAATAAAAAAGCCAATGAGAACAATATTTTGTGTCGTTTTTTTTATTTTCGCTTCAATT  
CTCTATACACGTACGTCATCACTACGGGAAACCAAAAAAAAAAAAAAAAAAGAAAACAGTACAAAAAGGTTTACT  
TTACCCAT

TGAAAAAAAAAATGTGAAAGAGAGTAGAAAATTTTCATAACGAATCTCTTCTATTCTTATGTACCGTTCCG  
CCAAATTTTTTCATGAAAAAATTTGGGAAAAAGAAAAAAAAAAAAAAAAATAGTATATAAAGTAAAAAAGATGCG  
CAAGCCCG

AATGATATCCGGCTTTTCTTATAGGGAATAGTGGTGAAAGTTACGTAAATATATACATATAGAGCGGAAT  
GGTACTGCATATTTTTATTATTTTTTTTTTTTGAATATATATAAAGCATCGTCGCTTAAGACTAAACCTTCG  
AGGATCTG

AACTTACACGAATAGGATAACATGTATGCTAGCAGAATATATATGAAAGAAAAAAATTATTGATGCCTTT  
AACTTATACTATTATACTATATTATGTTATATTATATTATTAGTTTTATAGATATATTGAGATATGTTGA  
ATATGATG

ATTACCAATTAGACATGCTGCTTGCAACAAGAAAATGCACGCGTAACAAAATATATATATATATATATATA  
TATATGTATGTCCATACGGGTTTTTCGTTTTGTTGTGGTTGTAACAGCACAACAAAATGCTACACGGTGGC  
AAATTGGA

ACAATATGGAAAATCCACAGAAAGCTATTCATTGAAAAAATAGTACAAATAAGTCACATGATGATATTTGA  
TTTTATTATATTTTTAAAAAAGTAAAAAATAAAAAAGTAGTTTTATTTTTAAAAAATAAAATTTAAATATT  
AGTGTATT

CTATGGTGGTATTATTGATGCTAATACGGGTTTTTTATGAAAAAAAAAAGGATAACAACTTATATAAACTT  
ATATAAAAAATATACAATAAATGATCTACAAAGGGTAGGAAATAAAAAATAAGGGAGAAAAAAAAAATACA  
TGCGTAAG

CTCTCTTTACTGTACAGAAGATGCGTCACTAATTCAAAAAAAAAAAAAAAAAAAAAAAAAATATAAAAAAGAAA  
GATTTTGGAGAAGCTATATCCTTTTGTGACATACAATAGAGAACTTGTTCTGTTGGTAAGATATCTCATC  
TGAATAC

TCGCTTCAATTCTCTATACACGTACGTCATCACTACGGGAAACCAAAAAAAAAAAAAAAAAAGAAAACAGTACAA  
AAAGGTTTACTTTACCCATAGTTAGTATACGTAGATTTTATACACGCACTATTTTTCTTATATACAGGAGA  
TGGGTGGC

ACACCCCTGGGTGGAACAAGTCCTAGATAATCATCTTTTGTATTTTTTTTTCTTCTTTTATTAGTATG  
TATACATATATATTACTTTTTATATTCTTTATAGCGCATTTTAAACACCTTTCTGAAAAATGCTGAGATT  
TTTGATGC

GCTTATTTTTTTAATTCTTATGAAAAAAAAAATGTGAAAGAGAGTAGAAAATTTTCATAACGAATCTCTTC  
TATTCTTATGTACCGTTCCGCCAAATTTTTTCATGAAAAAATTTGGGAAAAAGAAAAAAAAAAAAAAAAATAGTA  
TATAAAGT

TCAAATTGGTAAATCCCATTAATTAAAAAAGAATTGTAACCTTATTTAAAAAAAAAAAAATAGTACATAACAA  
TAAAAAAAAAAAAAGATAATAATTTTTGAATTTATTGCTAGACATTCTTACGTTTATTGTGTTTCATGTTAACA  
AAAACACA

TCAGCGCCAAACAATATGGAAAATCCACAGAAAGCTATTCATTGAAAAAATAGTACAAATAAGTCACATGA  
TGATATTTGATTTTATTATATTTTTAAAAAAGTAAAAAATAAAAAAGTAGTTTTATTTTTAAAAAATAAAAT  
TTAAAATA

TCCGCTCCACCGTGGTCAAAGACAGGGGCAAAGAGCTCCTAGGTCTATATATATATCTATATACATATTTA  
TATATATTATTAGAACTTTACAATATAGTATATACCATTTCATTGTTTAAAGTTTCGGGTAATACTTTTTTTTT  
TCCTTGTC

TGATTCACAACCATTTTAGATGTCTGCAGCTTTTTTTTTTTTTGATTTTTTTACTAATTTTAGTGCGATTTT  
AGAATAACTCTTGGATTAATAAATAAAAAAATACAATTATCACTCAGATTTTGAAGCAATCTGATAAAA  
ATTGCAGC

TAGCAGAATATATATGAAAGAAAAAAATTATTGATGCCTTTAACTTATACTATTATACTATATTATGTTA  
TATTATATTATTAGTTTTATAGATATATTGAGATATGTTGAATATGATGACGAGGATGGTGGTTTAAAGTGT  
ATGGATTG

AACGAAGTGAGAAGAGGCTAGTATTTTTATATCTTAAAAAAAAAAAAAAAAAAAAAACAATAAAT  
ATTTGTATCTTATTGCTTATGATGATAATGTACAATGAATTCAAAACATGAAAATTGTTCAAAGTTTTTAT  
TTTTATTT

TCATGATGGTAGCCACTTAGACAGAGAGAAAACGAAGTGAGAAGAGGCTAGTATTTTTATATCTTAAAAA  
AAAAAAAAACAATAAATTTTGTATCTTATTGCTTATGATGATAATGTACAATGAATT  
CAAACAT

ATTGGAGCTAACCCCTACTGCTTTAGAGAAGGGAATCAAAGATCTATAAATTTTTATATTCATGAGCACATGT  
AGTTTTTTTTTTTTTAGTTTTAAATATAAGAAAAAAGATAGTATATATATATATATATATACATATACATA  
TAAAAGGA

ATATCATATCTCATGATGGTAGCCACTTAGACAGAGAGAAAACGAAGTGAGAAGAGGCTAGTATTTTTATA  
TCTTAAAAAAAAAAAAAAAAAAAAAACAATAAATTTTGTATCTTATTGCTTATGATGATAATGT  
ACAATGAA

TGGCTGATTACGGATCACGTTCAAATTGGTAAATCCCATTAATTAAAAAAGAATTGTAACCTTATTTAAAA  
AAAAAATAGTACATAACAATAAAAAAAAAAAGATAATAATTTTGAATTTATTGCTAGACATTCTTACGT  
TTATTGTG

AGGGAGGGATAATCGATCCCCAAATGGACAATACGATGTAACACCGTTATATAATTAATAAATGTATATAT  
GTAACCTTTTTTTGAAAAAATAAATGGTAATTTATTAATATTTGGACCGGTCAACAATCTCAGATATA  
GTTGAAAA

GAAGAGGCTAGTATTTTTATATCTTAAAAAAAAAAAAAAAAAAAAAACAATAAATTTTGTATCT  
TATTGCTTATGATGATAATGTACAATGAATTCAAAACATGAAAATTGTTCAAAGTTTTTATTTTTATTTTC  
TCTTTCGT

CGGATCACGTTCAAATTGGTAAATCCCATTAATTAAAAAAGAATTGTAACCTTATTTAAAAAAAAAATAG  
TACATAACAATAAAAAAAAAAAGATAATAATTTTGAATTTATTGCTAGACATTCTTACGTTTATTGTGTT  
CATGTTAA

ATTTTCATAACGAATCTCTTCTATTCTTATGTACCGTTCCGCCAAATTTTTTCATGAAAAAATTTGGGAAAA  
AGAAAAAAAAAAAAAATAGTATATAAAGTAAAAAAGATGCGCAAGCCCGGAATCGAACCGGGGGCCCAACG  
ATGGCAAC

AAATCCACAGAAAGCTATTCATTGAAAAAATAGTACAAATAAGTCACATGATGATATTTGATTTTATTATA  
TTTTTAAAAAAGTAAAAAATAAAGTAGTTTTATTTTTAAAAAATAAATTTAAATATTAGTGTATTTG  
ATTTCCGA

AATTCAAAAAAAAAAAAAAAAAAAAAATATAAAAAAGAAAGATTTTGGAGAAGCTATATCCTTTTTGTGAC  
ATACAATAGAGAACTTGTTCTGTTGGTAAGATATCTCATCTGAAATACAACAAGGAAAACCAAAGCCAT  
TTTTTCAT

AAAAAAAAACAGCTTTGCTGGAGGATGATTAACTTTTAATTTTTTTAATTATTAGGTTTTTCAATTTTTTA  
TGGTTTTTTGTGTAATAATGCAATGAACGAATCCATTTTTTATTTTGAAGTGTGAGAGGCCTTTATAAGGA  
AGACTCGG

AATAAAAAAAGGGAGGGATAATCGATCCCCAAATGGACAATACGATGTAACACCGTTATATAATTAATAA  
ATGTATATATGTAACCTTTTTTTGAAAAAATAAATGGTAATTTATTAATATTTGGACCGGTCAACAAT  
CTCAGATA

TTGAATATTTTTTATTTATATACGTATATATAGACTATTATTTATCTTTTAAATGATTATTAAGATTTTTTAT  
TAAAAAAAAAATTCGCTCCTCTTTTAAATGCCTTTATGCAGTTTTTTTTTTCCATTTCGATATTTCTATGTTCCG  
GGTTCAGC

GATACGAGACGACAAGATATGCAAAAGATAATAGTGTATCACACCTTTATGAGAAGCGAATTTTTTTTTTT  
TTTTTGGTTTAAATATATATATATATACATATATATAGATATAGATATACACATGTATAGATGTATTCTAGTT  
ATGCTTAT

CAGCTTTAAATTACCAATTAGACATGCTGCTTGCAACAAGAAAATGCACGCGTAACAAAATATATATATA  
TATATATATATATATGTATGTCCATACGGGTTTTTCGTTTTGTGGTTGTAACAGCACAAACAAAATGCT  
ACACGGTG

TATATAAAAACATATAACAATAAATGATCTACAAAGGGTAGGAAATAAAAAATAAGGGAGAAAAAAAATAC  
ATGCGTAAGTACATTAATAATTACAGGAAAAATCTTACTTTAGTTCTGATATTTACCATCGCGATACACCA  
ACCCATA

TTCTACTTTTTATATCCCGTTTTGGCTGATTACGGATCACGTTCAAATTGGTAAATCCCATTAATTAAAAAAG  
AATTGTAACCTTATTTAAAAAATAAGTACATAACAATAAAAAAATAAGATAATAATTTTGAATTT  
ATTGCTAG

TTGTGTCGTTTTTTTTTATTTTCGCTTCAATTCTCTATACACGTACGTCATCACTACGGGAAACCAAAAA  
AAAAAAGAAAACAGTACAAAAGGTTTACTTTACCCATAGTTAGTATACGTAGATTTTATACACGCACTA  
TTTTTCTT

GTCTTCCAGGGAAAAAAAAAAAAAAAAAAGAAAGCCAAAATAAGGAGCCTTGAAATGTGTATCTGATAT  
ATATAATGTGTATGTAAATATCTATTTAATTAGCCATTGGGATTTCAACTTCTTGTGTTGAAACAGAAGGAC  
GGATAAAA

CTTTTCTTTCTCTCTCTTTTTTTTTTTCTTGTTACATATTCCTATATATATATGTATATATATCTATATATAT  
ATATATCCCAGCGTATATGACTGCACAAGACGCAATTTTCTTGAACGGTTTTTTCTTTTCAGCACTGCGAA  
AGAGAGAG

AATGTGAAAGAGAGTAGAAAATTTTCATAACGAATCTCTTCTATTCTTATGTACCGTTCCGCCAAATTTTT  
CATGAAAAAATTTGGGAAAAAGAAAAAAAAAAAAAAAAAATAGTATATAAAGTAAAAAGATGCGCAAGCCCGGA  
ATCGAACC

AGACATGCTGCTTGCAACAAGAAAATGCACGCGTAACAAAATATATATATATATATATATATATATATATATAT  
TCCATACGGGTTTTTCGTTTTGTGGTTGTAACAGCACAAACAAAATGCTACACGGTGGCAAATTTGAAA  
AAGAGACT

TATTTAGAGATGCTTTCATCCCTCTGACGAAGGTGGTAGAGAACAAGAAAATGAATAACATTATATCATAT  
TCCTATATATATATATATATATATATATATATATATATATATATATATATATATATATATATATATATAT  
CATTACAC

AATCGATCCCCAAATGGACAATACGATGTAACACCGTTATATAATTAATAAATGTATATATGTAACATTTT  
TTTGAAAAAATAAAAATGGTAATTTATTAATAATTTGGACCGGTCAACAATCTCAGATATAGTTGAAAAA  
TCTTTAAT

GAACTTCCATAGACATTGAAAAATAACGAAAGAATAAAAAAATCTTTTTTTTTTTTTTGATATAAATAC  
AGTTGACTATATAAACAATATCAATACTATAAGCCTATATTTGATCAAGACGACATTATTTAGGTGCATC  
AACAACGG

CTTTACTAATGAACTTCCATAGACATTGAAAAATAACGAAAGAATAAAAAAATCTTTTTTTTTTTTTTG  
ATATAAATACAGTTGACTATATAAACAATATCAATACTATAAGCCTATATTTGATCAAGACGACATTATT  
TAGGTGCA

CGTGGTCAAAGACAGGGGCAAAGAGCTCCTAGGTCTATATATATATCTATATACATATTTATATATATTAT  
TAGAACTTTACAATATAGTATATACCATTTCATTGTTTAAAGTTTCGGGTAATACTTTTTTTTTTCCTTGTTCAT  
AACCCCAA

CTTTAATACATTCCATGTTCTCATATATACTTTTACTGACACCTTTTCGTCACTATTTTTTGTTTAACTTTT  
TTTTTGGAAAGTACTAAAATTATATGCTCGTAATTATTGAGTATCAAAAAAAAAAAAAAAAAAAATTGCTGT  
GACACCCC

GTCTAGCACTTGAGTATACCTCTATATGCTGTGTAAAATAGAAAATAAAAAAGCCAATGAGAACAATATTT  
TGTGTCGTTTTTTTTTATTTTCGCTTCAATTCTCTATACACGTACGTCATCACTACGGGAAACCAAAAAA  
AAAAAGA

TTAATTCTTATGAAAAAAAAAATGTGAAAGAGAGTAGAAAATTTTCATAACGAATCTCTTCTATTCTTATG  
TACCGTTCCGCCAAATTTTTCATGAAAAAATTTGGGAAAAAGAAAAAAAAAAAAAAAAAATAGTATATAAAGTAA  
AAAAGATG

GATGTATGTTTTTCTTTATGTAGAGCTTGGCAGCTTTAAAATTACCAATTAGACATGCTGCTTGCAACAAG  
AAAATGCACGCGTAACAAAATATATATATATATATATATATATATATATATGTATGTCCATACGGGTTTTTCGTTTT  
GTTGTGGT

CCATTTTAGATGTCTGCAGCTTTTTTTTTTTTTGATTTTTTTACTAATTTTAGTGCGATTTTAGAATAACTC  
TTGGATTAATAAATAAAAAAAAAATACAATTATCACTCAGATTTTGAAGCAATCTGATAAAAATTGCAGCAT  
ATTATTAT

CCACGGCCTAATCTCTGTAAGGATTGTATTTTTATTTTTATTTATTTATTATTTAGATTTTCTAAAAATAA  
AAAAAATCATACTACTATTTTGATTACTACTATGTAATTTATCTTTGAAAACAACCATGAAAACTCAA  
TTTTACAC

AAGTCAAAAAATAGTTTTTGGGATATATCTTGTGATCAAATGCTTTGCAAAAGGGTAAAACAGCGTTTACA  
ATAGGATAGCCAAAAGTAAAAAAAAAAAAAAAAAAAAAAAAAAGAAGGAAGTTAGTATCGAGCTCAAACAATTT  
TAGTTTTG

TTTTTCTTTGTTCTTTACGTTTGATTCTATTTCAACCATAATTTATTTTTTTCGTTATTTAATAATTACTAA  
TATTTAATACTAGATGTATATACGTTGTGTGTATGCGCTACTATAGTATAGCTTAACTGTTTTATTATACC  
CTTTTTTT

TGAGAAGCGAATTTTTTTTTTTTTTGGTTTTAAATATATATATATACATATATATAGATATAGATATACAC  
ATGTATAGATGTATTCTAGTTATGCTTATACCTAGAACTGATCAGACCAGATCATACTGGTATAGAGCTT  
AATCGATA

ACTCCACTCCACGGCCTAATCTCTGTAAGGATTGTATTTTTATTTTTATTTATTTATTATTTAGATTTT  
CTAAAAATAAAAAAAAAATCATACTACTATTTTGATTACTACTATGTAATTTATCTTTGAAAACAACCATG  
AAAACTC

ATATCCCGTTTTGGCTGATTACGGATCACGTTCAAATTGGTAAATCCCATTAATTAATAAAGAATTGTAACC  
TTATTTAAAAAAAAAATAGTACATAACAATAAAAAAAAAAAGATAATAATTTTGAATTTATTGCTAGAC  
ATTCTTAC

TCCGCAAGAATGATTCAACAACATTTTAGATGTCTGCAGCTTTTTTTTTTTTTGATTTTTTTACTAATTTTA  
GTGCGATTTTGAATAACTCTTGGATTAATAAATAAAAAAAAAATACAATTATCACTCAGATTTTGAAGCAA  
TCTGATAA

TAATCATCTTTTGTATTTTTTTTTCTTCTTTTATTAGTATGTATACATATATATTACTTTTTTATATTCTTT  
ATAGCGCATTTTAAACACCTTTCTGAAAAAATGCTGAGATTTTTGATGCTAATCGAAAGATTAATAAAGG  
TCTATAGA

CCATTCTATTTAAACATATAAAAAGTACGATTAGTTGGTGTGGTTATATAAGTCATAAAAATAATTATCATAT  
TAAAAAATTGAAAAATAAAAACTACTCTTTTTTATTTCAATAGTTCTCGTTATTAGTAGGTCGTGCTCTT  
AAAAGATT

CGAGTATGACGTCTTCCAGGGAAAAAAAAAAAAAAAAAAAAAGAAAGCCAAAATAAGGAGCCTTGAAATGTG  
TATCTGATATATAATGTGTATGTAAATATCTATTTAATTAGCCATTGGGATTTCAACTTCTTGTGTTGAA  
ACAGAAGG

CGAAAAATATATTTTTCCGTTTTTTTTTTTTTTTTCGGAACAAAGATAACGCGTTAAAACCTGTGGATGTAA  
TAAGGATCTGAAACACTGACTAAAACGCGTCCTCATTTAAAATCAAAAAATTACTTCTTCTCCTCCCTTAC  
GGTGCCCT

TTTTTTTTGGTTTTGTGTACGTATCCCACCGTACTTACCATCTTCTCTCCTTTATATATATATATATATATGT  
ATATTTTCAGTGTATATACATACATTCTTATACAATACCGTATAAGAACGTATGTATGTATGTATGATTTT  
CTCACATT

AAAAAAATAGTACATAACAATAAAAAAAAAAAAAAGATAATAATTTTGAATTTATTGCTAGACATTCTTACG  
TTTATTGTGTTTCATGTTAACAAAAACACATGCCCGCGTTATTATCGCTTTTTAATTGCTTTCTTAAAAAG  
AGTCGGTT

CTCATATGCAGCGGTACATGATACGAGACGACAAGATATGCAAAAGATAATAGTGTATCACACCTTTAT  
GAGAAGCGAATTTTTTTTTTTTTTTTTGGTTTTAAATATATATATATACATATATATAGATATAGATATACACA  
TGTATAGA

AGACATTGAAAAATAACGAAAGAATAAAAAAAAAAATCTTTTTTTTTTTTTGATATAAATACAGTTGACTAT  
ATAAACATATATCAATACTATAAGCCTATATTTGATCAAGACGACATTATTTAGGTGCATCAACAACGGAA  
AAGAACT

GAATAGGATAACATGTATGCTAGCAGAATATATATGAAAGAAAAAATTATTGATGCCTTTAACTTATAC  
TATTATACTATATTATGTTATATTATATTATTAGTTTTATAGATATATTGAGATATGTTGAATATGATGAC  
GAGGATGG

TCGATTTTGCAATTTTTGGAAATTAATTGTGTAGCTTTTTCTTCTCTTAATTGGTGGCAGTTTTTATATATT  
CAGTTTGAATACCTTTTTTTTTTTTTTTTTTTTTCTTCGCTTTTCGCATCTCATCGCTGGAAGTGGTGCTC  
TTTTACAG

TATATATATATATATATATATATTTTTATTTGTTTACTTTTTCTATCAGTGTTTTCAATTTTTTATTAACAATG  
TTTGATTTTTTAAATCGCAATTTAATACCTAAATATAAAAAATGTTATTATATTGCAAAAACCCATCAACC  
TTGAAAAA

AAAGTACGATTAGTTGGTGTGGTTATATAAGTCATAAAAATAATTATCATATTTAAAAAATTGAAAAATAAAA  
AACTACTCTTTTTTATTTCAATAGTTCTCGTTATTAGTAGGTCGTGCTCTTAAAAGATTACCCTTTCAGTA  
GATGGTAA

TCTATATGCTGTGTAATAAGAAAATAAAAAAGCCAATGAGAACAATATTTTGTGTGCTTTTTTTTTATTTT  
CGCTTCAATTCTTATACACGTACGTACACTACGGGAAACCAAAAAAAAAAAAAAGAAAACAGTACAAA  
AAGTTTTA

GAACAATATTTTGTGTGCTTTTTTTTTATTTTCGCTTCAATTCTCTATACACGTACGTACACTACGGGAA  
ACCAAAAAAAAAAAAAAGAAAACAGTACAAAAAGGTTTACTTTACCCATAGTTAGTATACGTAGATTTTTAT  
ACACGCAC

CGAATCTCTTCTATTCTTATGTACCGTTCCGCCAAATTTTTTCATGAAAAAATTTGGGAAAAAGAAAAAAA  
AAAAAATAGTATATAAAGTAAAAAGATGCGCAAGCCCGGAATCGAACCGGGGGCCCAACGATGGCAACGT  
TGGATTTT







TTTTACTGACACCTTTCGTCACTATTTTTTTGTTAACTTTTTTTTTTGGAAAGTACTAAAATTATATGCTCGT  
AATTATTGAGTATCAAAAAAAAAAAAAAAAAAAAAAATTGCTGTGACACCCCTTCAATGTGGTGTCTATACACC  
TGGTACT

ATATATATATATATATATATATATGTGTGTTTGTATACTCTGTGGGTATTTCCGTGTATATGGTTAATAATAG  
TAGTATCTTGTGAGTTTTTTTTTATGTTTTTCTTCGCGCGTCAACTTTCTACCAAGAGAAAAACAATATAAG  
GTCTCCTT

GCAATTTGAGATAGAACAACTCTTCATACTCGTATTTGCAATTTTTGGAAATTAATTGTGTAGCTTTTTCT  
TCTCTTAATTGGTGGCAGTTTTTATATATTCAGTTTAGAATACCCTTTTTTTTTTTTTTTTTTTCTTCGCT  
TTTCGCAT

TGTACAGAAGATGCGTCACTAATTCAAAAAAAAAAAAAAAAAAAAAAAAATATAAAAAAGAAAGATTTTGGAG  
AAGCTATATCCTTTTGTGACATACAATAGAGAACTTGTCTGTTGGTAAGATATCTCATCTGAAATACAA  
CAAGGAAA

TCTAATTTATCTTTAAAATTATATATATATATATATATATATATATGTGTGTTTGTATACTCTGTGGGTATTTCC  
GTGTATATGGTTAATAATAGTAGTATCTTGTGAGTTTTTTTTTATGTTTTTCTTCGCGCGTCAACTTTCTAC  
CAAGAGAA

AATGGAATTACTTTAATACATTCCATGTTCTCATATATACTTTTACTGACACCTTTCGTCACTATTTTTTTG  
TTTTAACTTTTTTTTTTGGAAAGTACTAAAATTATATGCTCGTAATTATTGAGTATCAAAAAAAAAAAAAAAAA  
AAATTGCT

GTGGACATCTGTATATTGTGTTAGTGTGTGTTTATCGAGGTTACAAATATAAAAAATCTTGTGATATATGTC  
TTTTAAAGATACTCTTTTTGAAGCTCATCGCATTTTTTTTTTTTTTTTTTTTCATTTTAAAATTTTTACCGGT  
TTCTCGGG

AAAAAGTGAAAAATAAACAGAATGTGATAACGGTAAAAGAAAATCAAAAATAAACAAAAAAAAATACATAT  
ATAACTATTATTCATGATAGTAAACAGGTGAATTAAGATATTTAGTACAATTGTCTATTACCCCAATAGGC  
ATAATCCT

TCTTTTTTTTTTTTATTACAGAATATCTTCAAGTTTTTTTTGTATCTTTTTGTATTATTATTAACCTCTTTAT  
AATATTTGTCTTATAAAATCCTATCATAACATGACTATGGCTTGGCCTAGACTCGGGTGCCATCTTTTTTA  
ATGCGACT

AGGGCATTAAAGCTTATTTTTTTAATTCTTATGAAAAAAAAAATGTGAAAGAGAGTAGAAAATTTTCATAAC  
GAATCTCTTCTATTCTTATGTACCGTTCGCCAAATTTTTTCATGAAAAAATTTGGGAAAAAGAAAAAAAA  
AAAAATAG

AACCAAAAAAAAAAAAAAGAAAACAGTACAAAAAGGTTTACTTTACCCATAGTTAGTATACGTAGATTTTA  
TACACGCACTATTTTTCTTATATACAGGAGATGGGTGGCCACAGAACCCGCGCCTAGCCTATTTCTTTCTT  
CTTAGACC

GTAAAAAATAAAAAAAAAATAACCATGGAATATGTTTCTAAGAATTCGCAATCCTTGTTTATATAACTATAGC  
TTTTTTTTATGTTATAAGAAAACATTTATTCTTTAACCAAAAGGAAAAAGGTAACAACCCCACTTACCCCT  
CTGTCAAT

TGTGATCAAATGCTTTGCAAAAGGGTAAAACAGCGTTTACAATAGGATAGCCAAAAGTAAAAAAAAAAAA  
AAAAAAAAAGAAGGAAGTTAGTATCGAGCTCAAACAATTTTAGTTTTGCTGGACATATTTTCAGTTTCAT  
TACTGTAT

AAGAGCGAAAAAAGTAAAAATAAACAGAATGTGATAACGGTAAAAGAAAATCAAAAATAAACAAAA  
AAATACATATATAACTATTATTCATGATAGTAAACAGGTGAATTAAGATATTTAGTACAATTGTCTATTAC  
CCCAATAG

TGAGTATACCTCTATATGCTGTGTAAAATAGAAAATAAAAAAGCCAATGAGAACAATATTTTGTGTCGTTT  
TTTTTATTTTCGCTTCAATTCTCTATACACGTACGTCATCACTACGGGAAACCAAAAAAAAAAAAAAGAAA  
ACAGTACA

GAGCCGCCCATGCGGAATCATGTCTCCGCGCAGAGGACTCATTAGTTTCCGTTTCGCGGTGATTAGTACTCG  
CGAAAAGAGAAAAAGAAAAATAGTAGGAACATTTTCGCAATTGATCAAAATGTAAACAGTGCAGTAAAGAAT  
GGGACCAT

CGGCAAGATCATTGGAGCTAACCCCTACTGCTTTAGAGAAGGGAATCAAAGATCTATAAATTTTATATTTCAT  
GAGCACATGTAGTTTTTTTTTTTTTTAGTTTTAAATATAAGAAAAAAGATAGTATATATATATATATATA  
CATATAACA

ACCAACTGTTTCGTGATCGTCATCCATTGAGCTTTTCTTCTCTCTCTTTTTTTTTTTCTTGTACATATTC  
CTATATATATGTATATATATCTATATATATATATATATATATATATATATATATATATATATATATATAT  
TGAACGGT

TTAGTGTGTGTTTATCGAGGTTACAAATATAAAAAATCTTGTGATATATGTCTTTTAAAGATACTCTTTTTG  
AAGCTCATCGCATTTTTTTTTTTTTTTTTTTTCATTTTAAATTTTTTACCAGTTTCTCGGGTAAACAGCTCTAA  
ATGAAATC

TCAATTTTTTTATTAACAATGTTTGATTTTTTAAATCGCAATTTAATACCTAAATATAAAAAATGTTATTA  
TATTGCAAAAACCCATCAACCTTGAAAAAAGTAGAAACGTTTTATTTAATTCTATCAATACATCATAAAA  
TACGAACG

CAAAAACATCATCCTTATCATAATCACCCCTTCCAACGATAGCGGTAATGAAAAGAATTGACTTTTTTTTTT  
TTTTTTTTTTCATTTTCTTCTCCTCACCGAAAATAATTATTCTTAATCTGATGGATTTCATCGCAAACGGTT  
GGATGAGT

CAGTTCTTCGACCAACTGTTTCGTGATCGTCATCCATTGAGCTTTTCTTCTCTCTTTTTTTTTTTCTTG  
TTACATATTCCTATATATATGTATATATATCTATATATATATATATATATATATATATATATATATATAT  
GCAATTTT

TTATCTCCTCTTAATGCCTTAAGTCAAAAAATAGTTTTTGGGATATATCTTGTGATCAAATGCTTTGCAAA  
AGGGTAAAACAGCGTTTACAATAGGATAGCCAAAAGTAAAAAAAAAAAAAAAAAAAAAAAAAAGAAGGAAGTTA  
GTATCGAG

ACTGAAACAGCCATTCTATTTAAACATATAAAAGTACGATTAGTTGGTGTGGTTATATAAGTCATAAAATA  
ATTATCATATTAAAAAATTGAAAAATAAAAACTACTTTTTTTATTTCAATAGTTCTCGTTATTAGTAGG  
TCGTGCTC

TTCTTTACGTTTGATTCTATTTCAACCATAATTTATTTTTTCGTTATTTAATAATTACTAATATTTAATAC  
TAGATGTATATACGTTGTGTGTATGCGCTACTATAGTATAGCTTAACTGTTTTATTATACCTTTTTTTTTCT  
CTCTTTAC

CTATTCTTATGTACCGTTCCGCCAAATTTTTTCATGAAAAAATTTGGGAAAAAGAAAAAAAAAAAAAATAGT  
ATATAAAGTAAAAAAGATGCGCAAGCCCGGAATCGAACCGGGGGCCCAACGATGGCAACGTTGGATTTTAC  
CACTAAAC

TCTCTATACACGTACGTCATCACTACGGGAAACCAAAAAAAAAAAAAAGAAAACAGTACAAAAAGGTTTAC  
TTTACCCATAGTTAGTATACGTAGATTTTATACACGCACTATTTTTCTTATATACAGGAGATGGGTGGCCA  
CAGAACCC

TATATGACCCTGTATTTAATGTACGCGGTTAAAAAATTTTTATATTTTTTAAATAAGTATCAACTTGGATAA  
TATGATCTTGCCCGCAAGGTGGTTTTATATGAATAATTACTTTTTTTTTTTTTTTTTTTTTTTTTTTTTTTT  
TTTTAATT

TGTATTTAATGTACGCGGTTAAAAAATTTTTATATTTTTTAAATAAGTATCAACTTGGATAATATGATCTTG  
CCCGCAAGGTGGTTTTATATGAATAATTACTTTTTTTTTTTTTTTTTTTTTTTTTTTTTTTTTTTAATTGA  
ACAATAGA

GTACGCGGTTAAAAAATTTTTATATTTTTTAAATAAGTATCAACTTGGATAATATGATCTTGCCCGCAAGGT  
GGTTTTATATGAATAATTACTTTTTTTTTTTTTTTTTTTTTTTTTTTTTTTTTTTAATTGAACAATAGATG  
CAGAGGAA

GCTCTTCCTGTATATGACCCTGTATTTAATGTACGCGGTTAAAAAATTTTTATATTTTTTAAATAAGTATCA  
ACTTGGATAATATGATCTTGCCCGCAAGGTGGTTTTATATGAATAATTACTTTTTTTTTTTTTTTTTTTTT  
TTTTTTTT

ATACATGTATCTTTTTGGTTGGTTAATTTATCTAAACAGTTTTTATATATATATATGTATATATATATATAT  
ATACACAGTATTAATATTCTTTCCTTGAGATTACTCTCTATAAAAAAAAAAAAAAAAAAAGCTTTTAAAAAA  
AAAAAAC

CTTTTTGGTTGGTTAATTTATCTAAACAGTTTTTATATATATATATGTATATATATATATATATATACACAGTA  
TTAATATTCTTTCCTTGAGATTACTCTCTATAAAAAAAAAAAAAAAAAAAGCTTTTAAAAAACTC  
AAAAAAG

ATGCCGCGCGCGCAATTGCTCATGATATAATAATAGCTAATAATATGATAATATGATAATAATAGATAAG  
ATTACTGATAACATTATTTTAGTATTCAAAGCGTATTACATATATATAGTCGAGTAAATACTTTTTTTTC  
AATGGGGA

GTATATAACAGGGCACTTTCGGCAGTGAATCAATAGGAGGCGTATAAGAAAAGCCAATTAGTACCTATATA  
TATATATATATATATATATATATATATATATATATATATATATATATATATATATATATATATATATAT  
CCAAGAAA

GGGCACTTTCGGCAGTGAATCAATAGGAGGCGTATAAGAAAAGCCAATTAGTACCTATATATATATATATA  
TATATATATATATATATATATATATATATATATATATATATATATATATATATATATATATATATATATA  
TCTATAAT

GGCAGTGAATCAATAGGAGGCGTATAAGAAAAGCCAATTAGTACCTATATATATATATATATATATATATA  
TATATATATATATATATATATATATATATATATATATATATATATATATATATATATATATATATATATA  
AGACACAA

AATAGGTAAAAATAATAAAAATACATGTATCTTTTTGGTTGGTTAATTTATCTAAACAGTTTTTATATATAT  
ATGTATATATATATATATATATATATATATATATATATATATATATATATATATATATATATATATATA  
AAAAAAA

AAAAAATTTTTATATTTTTTAAATAAGTATCAACTTGGATAATATGATCTTGCCCGCAAGGTGGTTTTATAT  
GAATAATTACTTTTTTTTTTTTTTTTTTTTTTTTTTTTTTTTTTTAATTGAACAATAGATGCAGAGGAATG  
CTCCAAA

GCTATCTCAAATGCCGCGCGCGCAATTGCTCATGATATAATAATAGCTAATAATATGATAATATGATAAT  
AATAGATAAGATTACTGATAACATTATTTTAGTATTCAAAGCGTATTACATATATATATAGTCGAGTAAATA  
CTTTTTTT

TATATACCGTATATCGGTTCTTTCCAATTTTTTTTTTTTTTTTTTTTTTTTTTTTTTTTTTTGGTTGTAAT  
ATTAAGAATAAACATTTATCTGATATGTAATTGCATTTATAAATGTACAGTACCGCATTTAAAGTTTG  
CTGATAAT

AACAAAAAAAATTGAAAAGTAACTACAATTGCTACTAGTTATTATTGGCCAAGTCATAAAGGGACCTTG  
TCTCGATTTTATATACCGTATATCGGTTCTTTCCAATTTTTTTTTTTTTTTTTTTTTTTTTTTTTTTTTTT  
GGTTGTAA

AATAAGTATCAACTTGGATAATATGATCTTGCCCGCAAGGTGGTTTTATATGAATAATTACTTTTTTTTTTT  
TTTTTTTTTTTTTTTTTTTTTTTTTTTTTTTTTTTTTAATTGAACAATAGATGCAGAGGAATGCTCCAAAATTTATTTCTTG  
ACAATAT

CAATAGGAGGCGTATAAGAAAAGCCAATTAGTACCTATATATATATATATATATATATATATATATATATATA  
TTCCTTTATTATAATTCCTATCAGCGATTTTTGCATCACACCCAAGAAAAATCTATAATAGAGACACAAAA  
AAATGAAC

TTATTATTGGCCAAGTCATAAAGGGACCTTGTCTCGATTTTTATATACCGTATATCGGTTCTTTCCAATTTT  
TTTTTTTTTTTTTTTTTTTTTTTTTTTTTTTTTTTTGGTTGTAATATTTAAAAGAATAAACATTTATCTGATATGTA  
ATTGCATT

TTTCCAATTTTTTTTTTTTTTTTTTTTTTTTTTTTTTTTTTTTTGGTTGTAATATTTAAAAGAATAAACATTTA  
TCTGATATGTAATTGCATTTATAAAATGTACAGTACCGCATTTAAAGTTTGCTGATAATTAATCTAGAAT  
TTTATACC

TATGATTGTCGTATATAACAGGGCACTTTCCGGCAGTGAATCAATAGGAGGCGTATAAGAAAAGCCAATTAG  
TACCTATATATATATATATATATATATATATATATATATATATATATATTTCTTTATTATAATTCCTATCAGCGATTT  
TGCATCAC

CCAAGTCATAAAGGGACCTTGTCTCGATTTTTATATACCGTATATCGGTTCTTTCCAATTTTTTTTTTTTTTT  
TTTTTTTTTTTTTTTTTTTTTTTTTTTTTTTTTTTTGGTTGTAATATTTAAAAGAATAAACATTTATCTGATATGTAATTGCATTTA  
TAAAATGT

ATATCGGTTCTTTCCAATTTTTTTTTTTTTTTTTTTTTTTTTTTTTTTTTTTTTGGTTGTAATATTTAAAAGAA  
TAAACATTTATCTGATATGTAATTGCATTTATAAAATGTACAGTACCGCATTTAAAGTTTGCTGATAATTA  
AATCTAGA

ACTCCACTTTGCTTCTATAGTCCTATCTATTGTTCTTTTTATTCCCTAGCATAACCTTATTGTATTGTTCTT  
TTTTTTTTTCTTTTTCTTTTTTTTTTTTTTTTTTTTTTTTTTTTTTTTTTTCACATCTTTTTCCACGGCCGCTCAA  
GGGTCTC

AATAATAAAAAATACATGTATCTTTTTGGTTGGTTAATTTATCTAAACAGTTTTATATATATATATGTATATAT  
ATATATATATATACACAGTATTAATATTCTTTCCTTGAGATTACTCTCTATAAAAAAAAAAAAAAAAAAAAAAGC  
TTTTAAAA

GATTAAGTTTGCTATCTCAAATGCCGCGCGCGGAATTGCTCATGATATAATAATAGCTAATAATATGATA  
ATATGATAATAATAGATAAGATTACTGATAACATTATTTTAGTATTCAAAGCGTATTACATATATATAGT  
CGAGTAAA

GGTTAATTTATCTAAACAGTTTTATATATATATATGTATATATATATATATATATATACACAGTATTAATATTCT  
TTCCTTGAGATTACTCTCTATAAAAAAAAAAAAAAAAAAAAAAGCTTTTTAAAAAAAAAAAAAACTCAAAAAAGAA  
AGAATATT

GTCTCGATTTTTATATACCGTATATCGGTTCTTTCCAATTTTTTTTTTTTTTTTTTTTTTTTTTTTTTTTTTTT  
TGGTTGTAATATTTAAAAGAATAAACATTTATCTGATATGTAATTGCATTTATAAAATGTACAGTACCGCAT  
TTAAAGTT

ATATGATCTTGCCCGCAAGGTGGTTTTATATGAATAATTACTTTTTTTTTTTTTTTTTTTTTTTTTTTTTTTTTTT  
TTTTTAATTGAACAATAGATGCAGAGGAATGCTCCAAAATTTATTTCTTGAACAATATTACAAGAGGCAG  
ATATATAC

GCTTCTATAGTCCTATCTATTGTTCTTTTTATTCCCTAGCATAACCTTATTGTATTGTTCTTTTTCTTTTTCT  
TTTTTTCTTTTTTTTTTTTTTTTTTTTTTTTTTTTTTTTTTTCACATCTTTTTCCACGGCCGCTCAAAGGGGTCTCAC  
ACTGGATT

TTGTCAGTATTATTATTGGCCAAGTCATAAAGGGACCTTGTCTCGATTTTATATACCGTATATCGGTTCT  
TTCCAATTTTTTTTTTTTTTTTTTTTTTTTTTTTTTTTTTTTTTTTTTTTTTTTTTTTTTTTTTTTTTTTTTTTT  
CTGATATG

ATTCAAAATGCCTACTTACCGCATTGTATGTGGGAGAATGAACATATCTGTAATTGTATTATATAAAAGTA  
GTTAGTTTTTTTTTTTTTTTTTTTTTTTTTTTTTTTTTTTTTTTTTTTTTTTTTTTTTTTTTTTTTTTTTTTT  
ATTTTGAA

AATTGGATGTAACAAAAAATTGAAAAGTAACTACAATTGTCTAGTATTATTATTGGCCAAGTCATAA  
AGGGACCTTGTCTCGATTTTATATACCGTATATCGGTTCTTTCCAATTTTTTTTTTTTTTTTTTTTTTTTT  
TTTTTTTT

CACCGCAGTTATTTATGATCATTTTGAACGGGAAGTATGGATGAATCTTTTTTTTTTTTTTTTTTATAGCAC  
GCAACTGAAAAAAGAAAAATTTTTCATCTTCGCTCGACGTTTCTTTGTAGTACTCATCTCTTT  
TTATATAA

CTGTTGGACGGTTGTCCGCGGAGTTTGAACCTCGCATCCTTCAATAACTTATTTTTTTTCTCAATCTTCG  
ATATTAGACATTTTTTTTTTCTATGCCTCCCTTTTCCAAGTAATGTTTTTTTTTTTTTTTTTTTTTTAG  
CTCCTCTC

AACTTGGATAATATGATCTTGCCCGCAAGGTGGTTTTATATGAATAATTACTTTTTTTTTTTTTTTTTTTT  
TTTTTTTTTTTTTTAATTGAACAATAGATGCAGAGGAATGCTCCAAAATTTATTTCTTGAACAATATTA  
CAAGAGGC

TATATTTTTAAATAAGTATCAACTTGGATAATATGATCTTGCCCGCAAGGTGGTTTTATATGAATAATTAC  
TTTTTTTTTTTTTTTTTTTTTTTTTTTTTTTTTTTTTTAATTGAACAATAGATGCAGAGGAATGCTCCAAAAT  
TATTTCTT

AAGGGACCTTGTCTCGATTTTATATACCGTATATCGGTTCTTTCCAATTTTTTTTTTTTTTTTTTTTTTT  
TTTTTTTTTTTTTGGTTGTAATATTAAGAATAAACATTTATCTGATATGTAATTGCATTTATAAAATGTAC  
AGTACCGC

GTTGTCCGCGGAGTTTGAACCTCGCATCCTTCAATAACTTATTTTTTTCTCAATCTTCGATATTAGACA  
TTTTTTTTTTTCTATGCCTCCCTTTTCCAAGTAATGTTTTTTTTTTTTTTTTTTTTTTAGCTCCTCTCAC  
AAAAGTAC

TCTTTTCTTTTTGTCTTGTCTTTCTTTCTTATTTATATATATATATATATATATAAATACTACTA  
TGTTATATTACATTATATTATTATCACATAATTATTACGTTTCATCGTGCCGAAACGTCACCTCCACGGT  
TTGGATCT

ATTTATGATCATTTTGAACGGGAAGTATGGATGAATCTTTTTTTTTTTTTTTTTTATAGCACGCAACTGAAA  
AAAAAAGAAAAATTTTTCATCTTCGCTCGACGTTTCTTTTGTAGTACTCATCTCTTTTTATATAAAG  
ATTAATTA

CCTACTTACCGCATTGTATGTGGGAGAATGAACATATCTGTAATTGTATTATATAAAAGTAGTTAGTTTTT  
TTTTTTTTTTTTTTTTTTTTTTTTTTTTTTTTTTTTATGTGTAATGCAAATACAAAAGAAGTGCAGGCATTTT  
TTCACTCG

GGTGTGAAAGCTCTTCTGTATATGACCCTGTATTTAATGTACGCGGTTAAAAAATTTTTATATTTTTTAA  
ATAAGTATCAACTTGGATAATATGATCTTGCCCGCAAGGTGGTTTTATATGAATAATTACTTTTTTTTTTT  
TTTTTTTT

TCCTATCTATTGTTCTTTTTATTCTAGCATAACCTTATTGTATTGTTCTTTTTCTTTTTCTTTTTCTTT  
TTTTTTTTTTTTTTTTTTTTTTTTTTTTTTTCCACGCGCTCAAAGGGGTCTCACACTGGATTAA  
AAGCTGAA

GCTATTGGTAACCATGAAGTGTAAGGCGACGCAGGAGAGATGAAAAGAATGAAATTTAAAAGAAATCCAAAA  
AAAAAAAAAAAAAAAAAAAAAGAAAAGAAAAGAAAAGGGGAATAACACAGCCGCGGGTAACATGAAGCGG  
CGCGAGCG

CCACGATTAGACTCCACTTTGCTTCTATAGTCCTATCTATTGTTCTTTTTATTCCCTAGCATAACCTTATTG  
TATTGTTCTTTTTCTTTTTCTTTTTCTTTTTTTTTTTTTTTTTTTTTTTTTTTTTTTTTCACATCTTTTTCCACG  
GCCGCTCA

AACGGAATAAGAGGAAAAGACCTTTTATCTATTCAAATTGTTTCCCTTAGGTATATATATATATATATATA  
TATATATATATTTTTCCCTGTATATATCTATGTAAATGACGAAAACGCATGACATTTTAAAACCTACCCCGG  
GTTTGACC

ACCATGAAGTGTAAGGCGACGCAGGAGAGATGAAAAGAATGAAATTTAAAAGAAATCCAAAAAAAAAAAA  
AAAAAAAAAGAAAAGAAAAGAAAAGGGGAATAACACAGCCGCGGGTAACATGAAGCGGCGGAGCGAT  
ACTTCCGT

TGACCTGTACACTAATTTAAACACTTTTTATCCATTTTTTTTTCGTATAAGCATATTTTACATCTTTATATAT  
ATTTATTTTTTTTTTTTTTTTTTTTTTTGGTAGAATAGATTACATATACAACTTTTTTCATAATGTCAAACCTATAG  
AGTTTTAT

AAAAAGAAAGAACGGAATAAGAGGAAAAGACCTTTTATCTATTCAAATTGTTTCCCTTAGGTATATATATA  
TATATATATATATATATATATTTTTCCCTGTATATATCTATGTAAATGACGAAAACGCATGACATTTTAAAA  
CCTACCCC

GAGGAAAAGACCTTTTATCTATTCAAATTGTTTCCCTTAGGTATATATATATATATATATATATATATATA  
TTTTCCCTGTATATATCTATGTAAATGACGAAAACGCATGACATTTTAAAACCTACCCCGGTTTGACCAC  
AACCACC

CTGTGTGACGGATTAAGTTTGCTATCTCAAATGCCGCGCGCGGAATTGCTCATGATATAATAATAGCTAA  
TAATATGATAATATGATAATAATAGATAAGATTACTGATAACATTATTTTAGTATTTCAAAGCGTATTACA  
TATATATA

GTAAATCAGTAAAAAAAAAATTAACAGTTTTTTTTTTTTCATTTTTTTTTTTTTATTCTTATTTATGTATGA  
TACTTTATTATTATTTCTTTAATTATTTATTTATTTAACTAACACGATGAGCACTTTTAACTGCAATGGT  
TAAACTGT

GACTTAAGATCTGTTGGACGGTTGTCCGCGGAGTTCGAACCTCGCATCCTTCAATAACTTATTTTTTTCC  
TCAATCTTCGATATTAGACATTTTTTTTTTTTCTATGCCTCCCTTTTCCAAGTAATGTTTTTTTTTTTTTTTT  
TTTTTTTT

GTAAC TACAATTGTC ACTAGTTATTATTGGCCAAGTCATAAAGGGACCTTGTCTCGATTTTATATAACCGTA  
TATCGTTCTTTCCAATTTTTTTTTTTTTTTTTTTTTTTTTTTTTTTTTTTGGTTGTAATATTTAAAAGAAT  
AAACATTT

TGTTCTTTTTTATTCCCTAGCATAACCTTATTGTATTGTTCTTTTTCTTTTTCTTTTTCTTTTTTTTTTTTT  
TTTTTTTTTTTTTTTTTTCACATCTTTTTCCACGGCCGCTCAAAGGGGTCTCACACTGGATTAAAAGCTGAAA  
CAAGAAAT

TGTTGAAAAAATAAGTATTTGAAAACGAAAAATAGTTTGTATGTTTGTATATAAGTTGTTATTATCAAA  
AATTAGAGGGAAAAAGTAACTAAATATATATTTAAAAAAAAAAAAAAAAAATAAATGTATGTTGGAATGAAATA  
GCGTAGTA

CACATTGTTATATATGTATCTATAAAGCGAAATTTTTTAAAATTAATTGATTAATTAATATTTTGTATCTA  
AAGTGTTCATACTATATTATTTACTTAGATTATACATAATTTAAAAAAAAAAAAAACTTTTTTCTTTGTTT  
TCATTTTG





ATAGCCCATACACCGCAGTTATTTATGATCATTTTCGAACGGGAAGTATGGATGAATCTTTTTTTTTTTTTTT  
TTTATAGCACGCAACTGAAAAAAAAAAAAAGAAAAATTTTTTCATCTTCGCTCGACGTTTCTTTTGTAGTAC  
TCATCTCT

ACGCTATATACTAAATAACAATAAGAAAAAGAAAAAGAACACAATATAGGAAAGCGTTCTAATTAACTAA  
AGAAAAAAAAAAAAATAAAAAAAAAAATAAAAAAGGTAACATAAAAGGACAAAAAACATAACAGCTGTTTA  
TAAAGTAC

CAAATTAGCTATTATTTCTCATTTGGTGATAATAATATATACATACATATATATATATATATAAATATA  
TAGGTATATATATAAATAACCTAAGACAAGTTAAATGAGTATAAAAAACCTTGAACGTAAATGAAAAAAAA  
AAAAATAC

TGCTCGCATAATGTTACCCGTTTATACCTCTATACGATTATTAAGGGAGGGTAATACTTTCTCAATTTTTT  
TTTTTTCAGTTTTTAATATTATTTCTTAAGATTTTTTCGGTGGCGTTTCGCGACAACCTACGAGAAAAAA  
AAAAAGAG

TGAATAATTACTTTTTTTTTTTTTTTTTTTTTTTTTTTTTTTTTTTTTTTTTAATTGAACAATAGATGCAGAGGAAT  
GCTCCAAAATTTATTTCTTGAACAATATTACAAGAGGCAGATATATACTTTTCTTATTTCCCTTAGTAA  
AGAATGAT

AAAAAAAAAAAAAAAAAAAAATAAACAAATGAGCAACCCATCAAATACCAAGAACAAGAATTTAATATAAT  
ATATAGTTATTAATTTAAATGTATATATGCAGTTCTGCTCTTATTTTGTGACCAATTTCTTTAAGTCATC  
CAAACCGA

GTTAGTATTATTATTATTATTATTATTATTATTATTATTATTATTATTATTATTATTATTATTATTATTATTAT  
TATTATATTATTATTAATACTAAATATTGACTGCTTTACGCACTAGATTGTGCGGGTAACGAATATTT  
TTTGAAAA

ACCAAGATGGATTCAAATGCCTACTTACCGCATTGTATGTGGGAGAATGAACATATCTGTAATTGTATTA  
TATAAAGTAGTTAGTTTTTTTTTTTTTTTTTTTTTTTTTTTTTTTTTTTTTATGTGTAATGCAAATACAAAAAG  
AACTGCAG

TTTTTTGCCACCACGATTAGACTCCACTTTGCTTCTATAGTCCATCTATTGTTCTTTTTTATTCTAGCAT  
AACCTTATTGTATTGTTCTTTTTCTTTTTCTTTTTCTTTTTTTTTTTTTTTTTTTTTTTTTTTTTTTTTCACATC  
TTTTTCCA

TGAAAAGAATGAAATTTAAAGAAATCCAAAAAAAAAAAAAAAAAAAAAAAAAAAAAGAAAAAGAAAGAAAAAGGGG  
GAATAACACAGCCGCGGTAACATGAAGCGGCGGAGCGATACTTCCGTGTTAAGTGATATCCATCTTTCT  
GCGGGTAA

GCCCGCAAGGTGGTTTTATATGAATAATTACTTTTTTTTTTTTTTTTTTTTTTTTTTTTTTTTTTTTTTAAATTG  
ACAATAGATGCAGAGGAATGCTCCAAAATTTATTTCTTGAACAATATTACAAGAGGCAGATATATACTT  
TTCCTTAT

ACTAATTAACAACACTTTTATCCATTTTTTTTCGTATAAGCATATTTTACATCTTTATATATATTTATTTTT  
TTTTTTTTTTATTTTGGTAGAATAGATTACATATACAACTTTTTCATAATGTCAAACATAGAGTTTTATTT  
CACATAAC

GTTTTTTTTTTTTTTTTTTGTACAGATTAGAAACCATACAGTGTAACCATTATATAGGTCAATTAATATAT  
TTATAGATCATCTGTCAATTTTTTTTTTATTTTTTTTTTGCAAAGCTCCCTTTTTCTGAAACCAACAACAA  
AATATAAA

CCCGCCTCTTAAATAAAAAACAATTACCACTGCAAAAATGTTCTTCAAACGCGTTTATTATATAATGAAAA  
AGAAATTCAAATTTTTTCGCGTTTGAATTTATGCTAAACAAATAACTCGAGGAGGGACGCGTCGAGAAAA  
TCGCGTCT

CCAGCTGTAAAAAACAGCAGATATCGCATAAAAAAATGGCCAGCTATAGAATAAAATTAGCCCAGCTATA  
TTTTTATAGCGTCTTTTGATGACGCGAAAAGTAGACTTCGCGTAACACGAAAATGCTGGTGCAGGTGGAT  
TTTTTTGG

CTCCTGTCGTTTTCTTTTTTTCATTTCTTTTTTCGCCAGCGGGAAGTACGCGGAAAACAAGAAACAAAAA  
AAAATAAAAAAATAAAAAATAAACAGAACTAAAATCTGATGATGAAATTGATATTC AATTGGAGAAAGA  
AGAAAGAT

TCTACCACTTTTTTTTTTTCATTTTTTAAAGTGTTATACTTAGTTATGCTCTAGGATAATGAACTACTTTTT  
TTTTTTTTTTTTTACTGTTATCATAAATATATATACCTTATTGTTGTTTGAACCGTCGGTTAATTCCTTA  
TCAAGGTT

GCAGGAGAGATGAAAAGAATGAAATTTAAAGAAATCCAAAAAAAAAAAAAAAAAAAAAAAAAAGAAAAAGAAA  
GAAAAAGGGGAATAACACAGCCGCGGTAACATGAAGCGGCGGAGCGATACTTCCGTGTTAAGTGATAT  
CCATCTTT

AGTAGAAGAGTTATGTTACAAATGTTGATATATATATATATATATATATATATATATATATATATATATGTATGGACATTTGT  
GATGAAAATATATCTTGAACAAGCGCGATTAAGTTCATAATAAAAAATCACAGAAAATTTTTTCAGGTCGCG  
GGCGTTCT

GCATTGTATGTGGGAGAATGAACATATCTGTAATTGTATTATATAAAAGTAGTTAGTTTTTTTTTTTTTTTT  
TTTTTTTTTTTTTTTTTATGTGTAATGCAAATACAAAAGAAGTGCAGGCATTTTGAAAGTTCACCTCGTA  
TAGGAAAC

TCATGGGAACATAGCCCATACACCGCAGTTATTTATGATCATTTTGAACGGGAAGTATGGATGAATCTTTTT  
TTTTTTTTTTTTTATAGCACGCAACTGAAAAAAAAAAAAAGAAAAATTTTTTCATCTTCGCTCGACGTTTCT  
TTTGTAGT

AGTAAAAATAATAGGTAAAAATAATAAAAAATACATGTATCTTTTTGGTTGGTTAATTTATCTAAACAGTT  
TTATATATATATGTATATATATATATATATATATACACAGTATTAATATTCTTTCCTTGAGATTACTCTCTAT  
AAAAAAA

AATCAAAAATCAAATTAGCTATTATTTCTCATTGTTGGTATAATAATATATACATACATATATATATATATA  
TATAAATATATAGGTATATATAAATAACCTAAGACAAGTTAAATGAGTATAAAAAACCTTGAACGTAAA  
TGAAAAAA

AGTTATAGTTACATTGTTATATATGTATCTATAAAGCGAAATTTTTTAAAATTAATTGATTAATTAATAT  
TTTGTATCTAAAGTGTTCATACTATATTATTTACTTAGATTATACATAATTAATAAAAAAAAAAAAACTTTTT  
TTCCTTGT

TATTCAAAAGGTGTTGAAAGCTTTCCTGTATATGACCCTGTATTTAATGTACGCGGTTAAAAATTTTT  
ATATTTTTAAATAAGTATCAACTTGGATAATATGATCTTGCCCGCAAGGTGGTTTTATATGAATAATTACT  
TTTTTTTT

AATAAGTATTTGAAAACGAAAAAATAGTTTGTATGTTTGTATATAAGTTGTTATTATCAAAAATTAGAGGG  
AAAAAGTAACTAAATATATATTAATAAAAAAAAAAAAAAAAAAATAAATGTATGTTGGAATGAAATAGCGTAGTAA  
GATAAAGG

ATTGCAGTTTTCTTTTCTTTTTGTCCTTGTCTTTCTTTTCTTCTATTTATATATATATATATATATATATATAT  
AATACTACTATGTTATATTACATTATATTATATCACAATAATTATTACGTTTCATCGTGCCGAAACGTCAC  
CTCCCAG

CACTCTGTACAGCTATATACTAAATAACAATAAGAAAAAGAAAAAGAACACAATATAGGAAAGCGTTCT  
AATTAAGTAAAGAAAAAATAAAAAAATAAAAAAAGGTAAGTAAAGGACAAAAACATAA  
CAGCTGTT

TGACAGAAAACCAAAGCAAGCCGATTTTCAGGTTAACCCCTTTATTAAAATAAAAAAAAAAAGCATGCATAA  
CACTAATAATATATTATTAAGCAATCTATATTATTTAAATTATCCGAAATTACTTTTATTACA  
TTATGACA

ATCATCTTTGAAGGCTTGTGCTGATCGAACGAAGCAAATCCTACGAGTAAATACATAAGCGTATACATATA  
TATATATATATATATATATATATATATATGTATATATATATATGTGTGTGTGTGTAATTGTGTGTATTCAA  
CTGAACTA

AATATATGAGAAAAAGTTGTTTTCACTTTGTGTTTCGAAAAATAAGTATTTGAAAACGAAAAATAGTTTG  
TATGTTTGTATATAAGTTGTTATTATCAAAAATTAGAGGGAAAAAGTAACTAAATATATATTA  
AAAAAAT

AAGCAACCTATGACCTGTACACTAATTAACACTTTTATCCATTTTTTTTTTCGTATAAGCATATTTTACAT  
CTTTATATATATTTATTTTTTTTTTTTTTTTTTTTTTTTGGTAGAATAGATTACATATACAACCTTTT  
CATAATGT  
CAAATAT

GTAGTATTATCTGTGTGACGGATTAAGTTTGCTATCTCAAATGCCGCGCGCGAATTGCTCATGATATAA  
TAATAGCTAATAATATGATAATATGATAATAATAGATAAGATTACTGATAACATTATTTTAGTATTCAAAA  
GCGTATTA

GTGAACATATTGCTCGCATAATGTTACCCGTTTATACCTCTATACGATTATTAAGGGAGGGTAATACTTTT  
TCAATTTTTTTTTTTTTTTCAGTTTTTAATATTATTTCTTAAGATTTTTTCGGTGGCGTTTTCGCGACA  
ACTTAC  
GAGAAAA

CAAGGAATTTGTAAATCAGTAAAAAAAAAATTAACAGTTTTTTTTTTTTTTCATTTTTTTTTTTTTTATTCTTAT  
TTATGTATGATACTTTATTATTATTTCTCTTAATTATTTATTTATTTAACTAACACGATGAGCACTTTTAA  
CTGCAATG

AGCTTCGTTGTCATGGGAACATAGCCCATACACCGCAGTTATTTATGATCATTTTGAACGGGAAGTATGGA  
TGAATCTTTTTTTTTTTTTTTTTTATAGCACGCAACTGAAAAAAAAAAAAAGAAAAATTTTTTCATCTTCGCT  
CGACGTTT

TGGTTTTATATGAATAATTACTTTTTTTTTTTTTTTTTTTTTTTTTTTTTTTTTTTTTTAAATTGAACAATAGAT  
GCAGAGGAATGCTCCAAAATTTATTTCTTGAACAATATTACAAGAGGCAGATATATACTTTTCTTATTT  
CCCTTAGT

GTTACATCTGTACGGCATTCCAGCTGTAAAAAACAGCAGATATCGCATAAAAAAATGGCCAGCTATAGA  
ATAAAATTAGCCCAGCTATATTTTATAGCGTCTTTTGTATGACGCGAAAAGTAGACTTCGCGTAACACGAA  
AAATGCTG

TAAATAAAAAACAATTACCACTGCAAAAATGTTCTTCAAACGCGTTTATTATATAATGAAAAAGAAATTC  
AAATTTTTCGCGTTTTGAAAATTTATGCTAAACAAATAACTCGAGGAGGGACGCGTTCGAGAAAATCGCGTCTTT  
CTACTCTC

TTTATATATATATGTATATATATATATATATATATACACAGTATTAATATTCTTTCTTGGAGATTACTCTCTA  
TAAAAAAAAAAAAAAAAAAGCTTTTAAAAAAAAAAAAACTCAAAAAAGAAAGAATATTCAAAGAAAGTTT  
CATCTTGT

CTACACGATGCTCCTGTGCTTTCTTTTTTTTCAATTTCTTTTTTTCGCCAGCGGGAAGTACGCGGAAAA  
CAAGAAACAAAAAATAAAAAAATAAAAAAATAAACAGAACTAAAATCTGATGATGAAATTGATATTC  
AAT  
TGGAGAAA

TTTTTTTTTTTTTTTATAGCACGCAACTGAAAAAAAAAAAAAGAAAAATTTTTTCATCTTCGCTCGACGTTT  
CTC  
TTTTGTAGTACTCATCTCTTTTTTATATAAAGATTAATTAGTTATTGTGCTTTTCTTTCTTTTAA  
AATGTTTC

ATTATATTCTAGCTTCGTTGTCATGGGAACATAGCCCATACACCGCAGTTATTTATGATCATTTTCGAACGG  
GAAGTATGGATGAATCTTTTTTTTTTTTTTTTTTATAGCACGCAACTGAAAAAAAAAAAAAGAAAAATTTT  
CATCTTCG

CGATGCATAATTGGCATCTAGCCCCAATGACGATACACTAATATATATATATATATATATATCTATATATC  
TGCAAGAAATAAGCGTGTGTAGTAAGTAAAAGGAAAAATAGAAATTTTGTCTCAAAAATAACGGTCCCATT  
TTGATACA

TTTCTGTAGGGTTTTTTTTTTTTTTTTTTGTACAGATTAGAAACCATACAGTGTAAACCATTATATAGGTCA  
ATTAATATATTTATAGATCATCCTGTCAATTTTTTTTTTATTTTTTTTTTGCAAAGCTCCCTTTTTCTGAAA  
CCAACAAC

TATTTTAAATAATCAAAAATCAAATTAGCTATTATTTCTCATTTGGTGATAATAATATATACATACATATA  
TATATATATATATAAATATATAGGTATATATATAAATAACCTAAGACAAGTTAAATGAGTATAAAAAACCT  
TGAACGTA

CCAGTCAGCGACATCTGTCTTTTTTTAATTACTATTGCTGTGTACTTATAGAGTCGGTGGCATTATTTTTA  
TTTTTAGTATTTTTTTATACGTGCGTATTCTATTGTTCAATTTTTTTACCAATTTTTTTTTTATTTTTATAT  
TTTGTTC

CATTTCTTTTTTCGCCAGCGGGAAGTACGCGGAAACAAGAAACAAAAAAAAAATAAAAAATAAAAAAT  
AAAACAGAACTAAAATCTGATGATGAAATTGATATTCAATTGGAGAAAGAAGAAAGATCTTGTTTAATTT  
GAAATAAA

ATAAGAAAAAGAAAAAGAAGCACAAATATAGGAAAGCGTCTAATTAACTAAAGAAAAAAAAAAAAATAAAAA  
AAAAATAAAAAAAGGTAACATAAAAAGGACAAAAACATAACAGCTGTTTATAAAGTACTTTATACGTAAG  
AACTACT

TTATTAATAAAAAAAAAAAGCATGCATAACACTAATAATATATTATTAATAAAAAAGCCAATCTATATT  
ATTTAAATTATCCGAAATTACTTTTTATTACATTATGACATTCTATAGTCTATGCAAGCGGATCAAAAAAC  
ATTCCATC

CTCGCAACAACCAAGATGGATTCAAAATGCCTACTTACCGCATTGTATGTGGGAGAATGAACATATCTGT  
AATTGTATTATATAAAGTAGTTAGTTTTTTTTTTTTTTTTTTTTTTTTTTTTTTTTTTTATGTGTAATGCAA  
ATACAAAA

AAAAAGTTGTTTTCACTTTGTGTTTCGAAAAATAAGTATTTGAAAACGAAAAATAGTTTGTATGTTTGTA  
TATAAGTTGTTATTATCAAAAATTAGAGGGAAAAAGTAACTAAATATATATTAATAAAAAAAAAAAAAATAA  
ATGTATGT

ATATTCAACAATTGCAGTTTTCTTTTCTTTTTGTCTTTGTCTTTCTTTCTTTCTATTTATATATATATATAT  
ATATATATATAATACTACTATGTTATATTACATTATATTATTATCACAAATAATTATTACGTTTCATCGTGCC  
GAAACGTC

CAAAGCCGCGCGTTCCTCGGAAAAAAAAAAGGAAGGCCACGCTATTGGTAACCATGAAGTGAAGGCGACG  
CAGGAGAGATGAAAAGAATGAAATTAAGAAATCAAAAAAAAAAAAAAAAAAAAAAAAAAAGAAAAAGAAAG  
AAAAAGGG

TTAATTAATATTTTGTATCTAAAGTGTTTCATACTATATTATTTACTTAGATTATACATAATTAATAAAAA  
AAAAACTTTTTTCTTTGTTTTTCAATTTGTTTTTATTATTAATATTAATAAAAAAGTGTCCATAACATCAAT  
GTTTTTTT

TTAAGATCTTCACTCTGTACACGCTATATACTAAATAACAATAAGAAAAAGAAAAAGAAGCACAAATATAGG  
AAAGCGTTCTAATTAACATAAGAAAAAATAAAAAAATAAAAAAAGGTAACATAAAAAGGACA  
AAAAACAT



GCGAGAATATTTTTTTGCCACCACGATTAGACTCCACTTTGCTTCTATAGTCTTATCTATTGTTCTTTTTA  
TTCCTAGCATAACCTTATTGTATTGTTCTTTTTCTTTTTCTTTTTCTTTTTTTTTTTTTTTTTTTTTTTTT  
TTTTTACA

TAACTTATTGTATTGTTCTTTTTCTTTTTCTTTTTCTTTTTTTTTTTTTTTTTTTTTTTTTTTTTTTT  
CTTTTTCCACGGCCGCTCAAAGGGGTCTCACACTGGATTAAGCTGAAAACAAGAAATGGCTCTTTTCGAT  
AAGGTTGC

TAAAAAAACTTTGGAAGCGTGCACACTCAGTCTTAAATCTGCCCTATACTACCGAAGATAAATACATGAA  
CTACACGTATCATATAACATCATATCTTTTTTTTTTTTTTTTTTTTTTTTTTTTTTCTAGGCTTTTACTAATA  
GGGCCTTA

TTTTTTTTTCATTTTTTAAAGTGTTATACTTAGTTATGCTCTAGGATAATGAACTACTTTTTTTTTTTTTT  
TTTACTGTTATCATAAATATATATACCTTATTGTTGTTTGAACCGTCGGTTAATTCCTTATCAAGGTTCC  
CCAAGTTC

TTTTTTAATTACTATTGCTGTGTACTTATAGAGTCGGTGGCATTATTTTTATTTTTAGTATTTTTTATAC  
GTGCGTATTCTATTGTTCATTTTTTTACCAATTTTTTTTTTTTTTTTTTATTTTTATTTTTGTTTCTTGCGT  
GGAGTT  
TTTACAGG

ATTATTTCTCATTTGGTGATAATAATATATACATACATATATATATATATAAATATATAGGTATATA  
TATAAATAACCTAAGACAAGTTAAATGAGTATAAAAAACCTTGAACGTAAATGAAAAAAAAAAAAATACTA  
GTAAATTG

GCTATTATCCTTGTTCCTTTCAAGGACTGCAGTAGAAGAGTTATGTTACAAATGTTGATATATATATATAT  
ATATATATATATATATGTATGGACATTTGTGATGAAAATATATCTTGAACAAGCGGATTAAGGTCATAAT  
AAAAATC

ATCGAATTTACGTAGCCCAATCTACCACTTTTTTTTTTTCATTTTTTAAAGTGTTATACTTAGTTATGCTCT  
AGGATAATGAACTACTTTTTTTTTTTTTTTTTTACTGTTATCATAAATATATATACCTTATTGTTGTTTGC  
AACCGTCG

CATATTTTTTCCAGTCACTATCATCATCATATTTTTGTATATATACATTTATTATATAAATATCATAAC  
CAATTTTTGCCAAAGAACACCGTTTCCCTCTTCGCGTTGACCACAGTAATTGCAGAAACGACAAAAAAA  
ACAAAAA

CCAGAGCCAGAATTGGATGTAACAAAAAATTTGAAAAGTAACTACAATTGTCAGTTATTATTGGC  
CAAGTCATAAAGGGACCTTGTCTCGATTTTATATACCGTATATCGGTTCTTTCCAATTTTTTTTTTTTTT  
TTTTTTTT

TTTTTTTTGTACAGATTAGAAACCATACAGTGTAACCATTATATAGGTCAATTAATATATTTATAGATCA  
TCCTGTCAATTTTTTTTTTTTTTTTTTTTTGCAAAGCTCCCTTTTTCTGAAACCAACAACAAATATAAAAA  
AAAAATGA

CATCCTTATAATTATATTCTAGCTTCGTTGTCATGGGAACATAGCCCATACACCGCAGTTATTTATGATCA  
TTTCGAACGGGAAGTATGGATGAATCTTTTTTTTTTTTTTTTTTATAGCACGCAACTGAAAAAAAAAAAAAG  
AAAAATTT

CAAGGACTGCAGTAGAAGAGTTATGTTACAAATGTTGATATATATATATATATATATATATATATATATAT  
GGACATTTGTGATGAAAATATATCTTGAACAAGCGGATTAAGGTCATAATAAAAAATCACAGAAAATTTT  
TCAGGTCG

ATTTTGAACGGGAAGTATGGATGAATCTTTTTTTTTTTTTTTTTTATAGCACGCAACTGAAAAAAAAAAAA  
GAAAATTTTTTCTCTTCGCTCGACGTTTCTTTTGTAGTACTCATCTCTTTTTTATATAAAGATTAATTAGT  
TATTGTCG

ATGAATCTTTTTTTTTTTTTTTTTTATAGCACGCAACTGAAAAAAAAAAAAAGAAAAATTTTTTCATCTTCGC  
TCGACGTTTTCTTTGTAGTACTCATCTCTTTTTATATAAAGATTAATTAGTTATTGTCGCTTTGCTTTTCC  
TTCTTTAA

TTTTTTTTTTTTTTTTTTTTTTTTTTTTTTTTTTGGTTGTAATATTAAGAATAAACATTTATCTGATATGT  
AATTGCATTTATAAATGTACAGTACCGCATTAAAGTTTGCTGATAATTAATCTAGAATTTTATACCTA  
GGATCATC

TTATGTTACAAATGTTGATATATATATATATATATATATATATATATATATGTATGGACATTTGTGATGAAAATA  
TATCTTGAACAAGCGGATTAAGGTCATAATAAAAAATCACAGAAAATTTTTTCAGGTCGCGGGCGTTCTCT  
CACCCGGC

ATTTCCCTTCCGAGTCACTTATTTTTTTTTTTCTTCTGAAAAATTAATTAGATTAATTTCAATTAATATCA  
TTTCCGCTTATCTGACTTCTTTCATTTTTTTTTCTCTATATTTTCGCGTTTACTAGGAAAGAAAAGGAAAAA  
AATTTTTT

TTAAAAAAAAAAAAAACTTTTTTCTTGTGTTTTCATTTTGTGTTTTATTATTAATATTAAAAAAGTGTCC  
ATAACATCAATGTTTTTTTTTACCTTTGATTAGTTTTTCATTGGCGAAACCATAATCCCGGTTCCATTCCCA  
TCATAACT

TCACGGCATTCCAGCTGTAAAAAACAGCAGATATCGCATAAAAAAATGGCCAGCTATAGAATAAAATTAG  
CCCAGCTATATTTTTATAGCGTCTTTTGATGACGCGAAAAGTAGACTTCGCGTAACACGAAAAATGCTGGT  
GCAGGTGG

AGAAGAAAAACAAAGAAGCCTCGCAACAAACCAAGATGGATTCAAAATGCCTACTTACCGCATTGTATGT  
GGGAGAATGAACATATCTGTAATTGTATTATATAAAGTAGTTAGTTTTTTTTTTTTTTTTTTTTTTTTTTT  
TTTTTTTA

AACACTTCAGAAAAATATTCTGCTACTATTCCTTACTTTACTATAAGAATTTTGTGTTTCCAAAAAAAAA  
ATATAAAAAAATAATCATACTCTATTACTATGGCTAACGTAGAAAAACCAACGATTGTTCCAGGCTTTCC  
CGTTGTTG

CCTCGCATCCTTCAATAACTTATTTTTTCTCAATCTTCGATATTAGACATTTTTTTTTTCTATGCCTC  
CCTTTTCCAAGTAATGTTTTTTTTTTTTTTTTTTTTTTTTTTAGCTCCTCTCACAAAAGTACTGAGGACTGAAA  
TGTA AAAA

AAAAAAAAAAAAAAAAAAAAAGAAAAAGAAAGAAAAAGGGGGAATAACACAGCCGCGGGTAACATGAAGCG  
GCGCGAGCGATACTTCCGTGTTAAGTGATATCCATCTTTCTGCGGGTAATAAGTCTAGTCAAGTCCGCTGT  
ATTTTTTC

GAAATCCAAAAAAAAAAAAAAAAAAAAAGAAAAAGAAAGAAAAAGGGGGAATAACACAGCCGCGGGTA  
ACATGAAGCGGCGGAGCGATACTTCCGTGTTAAGTGATATCCATCTTTCTGCGGGTAATAAGTCTAGTCA  
AGTCCGCT

GCTGAGAGGAAACACTGCTAAAGCAACCTATGACCTGTACACTAATTAACACTTTTTATCCATTTTTTTT  
CGTATAAGCATATTTTACATCTTTATATATATTTATTTTTTTTTTTTTTTTTTTTTTTGGTAGAATAGATTACAT  
ATACA ACT

TATAAAGCGAAATTTTTTAAAATTAATTGATTAATTAATATTTTGTATCTAAAGTGTTTCATACTATATTAT  
TTACTTAGATTATACATAATTAAAAAAAAAAAAAAACTTTTTTCTTGTGTTTTCATTTTGTGTTTTATTATTA  
AATATTA A

TTCTATGTAACATATTTTTTCCAGTCACTATCATCATCATCATATTTTGTATATATACATTTATTATATAA  
AATATCATACCAATTTTTGCCAAGAACACCGTTTTCCCTCTTCGCGTTGACCACAGTAATTGCAGAAACGA  
CAAAAAA



ACTAGTAGTAATAGTAGTCAGATACAAAAATTCATGTAACATATTTTTTCCAGTCACTATCATCATCATC  
ATATTTTGTATATATACATTTATTATATAAAATATCATACCAATTTTTGCCAAAGAACACCGTTTTCCCTCT  
TCGCGTTG

CCTTTTATCTATTCAAATTGTTTCCCTTAGGTATATATATATATATATATATATATATATATTTTTCCCTGT  
ATATATCTATGTAAATGACGAAAACGCATGACATTTTAAAACCTACCCCGGGTTTGACCACAACCCACCGT  
TCATCTAA

ATTCTAGCATAACCTTATTGTATTGTTCTTTTTCTTTTTCTTTTTCTTTTTTTTTTTTTTTTTTTTTTTTT  
TTTTTACATCTTTTTCCACGGCCGCTCAAAGGGGTCTCACACTGGATTAAGCTGAAAACAAGAAATGG  
CTCTTTTCG

GTTGGAATAACGCGAAAAGAAGGGTACGGCGTAATCACCCACACGGCTTGTATTTTTTTTCGGAGAACTAA  
GTCATAGACGTAATGCTAATTTTTCCGTCTAGCCGATGTTTATGCGGCTTTTATTTTTTTTTTTTTTTTT  
TCTCATCT

GAAGAAAAAAAAAACTGATATAGAACCCTAAAAATGTTTCGGCTTTTAAAATACAAATATGTACAGGTGTTAA  
TGTCTAAATAATGATAATCCAAACGCGATAATTTTTTTTTTTCGCGTTTGTTTTTGTTTCAGAAGAATAAGTA  
AACACTTC

TTATTATTATTATTATTATTATTATTATTATTATTATTATTATTATTATTATTATTATTATTATTATTATATTA  
TTATTAATACTAAATATTGACACTGCTTTACGCACTAGATTGTGCGGGTAACTGAATATTTTTTGAAAATG  
AAGAAAA

ATATAAGTTGTTATTATCAAAAATTAGAGGGAAAAAGTAACTAAATATATATTAATAAAAAAAAAAAAAATA  
AATGTATGTTGGAATGAAATAGCGTAGTAAGGATAAAGGTGTAATAGATATATATTTATAAGAAATAATCCG  
GTGTCTTC

TGTACTTATAGAGTCGGTGGCATTATTTTTATTTTTAGTATTTTTTATACGTGCGTATTCTATTGTTTCAT  
TTTTTACCAATTTTTTTTTTTTTATTTTTATTTTTGTTTCTTGCGTGGAGTTTTTACAGGAAGTTAATCACA  
ACAGAGGG

TTCTTTTTCGATTATACCAACAGAAAATTTTGGAGGAAAAACAATGTAGCTGTATAAATATATATATATA  
TATATGTATGTATACTTATTTATTTATATATATATATACAAAAGGCTACCAAAAAGATTAGCCGCCGAGGTA  
CATCGTGA

TGCAAAAAAAAAATTTTTTGTCAATTTCTTCGAATCAACTCAATGAAATTTGAAAAATAGCAGAAAATAAGT  
TGATAAGATCGCAATGTAATATATATATATATATATATATATTACAATTCGTGAACTGGCACAAGGAAAAG  
CGTGTAAAT

TTCGGTAACTAGGGGATAAGGGGCTTCGTCTACACGATGCTCCTGTCGTTTTTTTTTTTCAATTTCTTTTT  
TCGCCCAGCGGGAAGTACGCGGAAAACAAGAAACAAAAAAAAAATAAAAAAAAAATAAAAAATAAACAGAAAC  
TAAAATCT

TATATATATATATACACAGTATTAATATTCTTTCTTGAGATTACTCTCTATAAAAAAAAAAAAAAAAAAAG  
CTTTTAAAAAAAAAAAACTCAAAAAAGAAAGAATATTCAAAGAAAGTTTCATCTTGTGAGTTGAAATGA  
ATAGTTTA

TTCTCAAAAATGTAGCGTCGCTAAAATGGTTTTCTCTACCTTTAGTTTTACGCCAGATTTTTACTAGACGC  
GTTTTAGTTTACTTTTTCTACCCTGTTGTTTTTTTTTTTTTTTTTTTTCGCACCAAATTTTTCAACCGTTCCA  
TGGAAGCC

AATAGGTATAAAGGAGTTGAAATTAATAATAATAATAAATAATGATATAAAAAATTATAAGTTTCTCCTTT  
CGGAACTAAAAATAATATTAATAATAATATATAAATATTATATCTTTTTTATAATATAACATAGATACGA  
GTTTTTAT

GTCATAATTTGTAGTATTATCTGTGTGACGGATTAAGTTTGCTATCTCAAATGCCGCGCGCGGAATTGCT  
CATGATATAATAATAGCTAATAATATGATAATATGATAATAATAGATAAGATTACTGATAACATTATTTTA  
GTATTCAA

TTATTATCAAAAATTAGAGGGAAAAAGTAACTAAATATATATTAATAAAAAAAAAAAAAAAAAATAAATGTATGTT  
GGAATGAAATAGCGTAGTAAGGATAAAGGTGTAATAGATATATATTATAAGAAATAATCCGGTGTCTTCCT  
GGTGACGG

GGCCCATGCCTTCGTTACCTTGAATGGTATGTAAAGTGATAAAAAATATACACGTATATATATATATATAT  
ATATATATAAGTACGTGAGATCTATTTGTATAATATAATGCTAATAAAATAGTATCAACGATACTGTTGAT  
AAAGGTAA

CTGAAAGAGTCTTTGACAAAATTCCAGCCATTTTTTCAACCTTTTTTTTTATCCGTATATATTAAGGTATGC  
TATATGTGTATTTTCCAATGTTTAGTTTTTATAATAATACTTCTTCAGCATCAAATATGCTTGCTTATGTA  
AAAATACA

GTATTGTTCTTTTTCTTTTTCTTTTTCTTTTTTTTTTTTTTTTTTTTTTTTTTTTTTTTTTTTTTTTCCAC  
GGCCGCTCAAAGGGGTCTCACACTGGATTAAGGCTGAAAACAAGAAATGGCTCTTTTCGATAAGGTTGCAA  
CATTTTGA

TTATACATAATTAATAAAAAAAAAAACTTTTTTCTTGTGTTTTTCATTTTGTTTTTATTATTAATATTTAAA  
AAAAGTGTCCATAACATCAATGTTTTTTTTTACCTTTGATTAGTTTTTCATTGGCGAAACCATAATCCCCGT  
TCCATTCC

TCTTCGAAAACGTGATGAGAATTCTTCATTATTTTTTTTTTTTTCTTCTTTTATTATTTTTTATGTTTATTCCA  
TATATACACTTATAATTTTTTTTTTTGCGATTAATATAAGTTTGCCTGGATACACGAACATATATATGATT  
AAAATGGT

AAATTAATAATAATAATAATAATGATATAAAAATTATAAGTTTCTCCTTTTCGGAACATAATAATATT  
AATAATAATATATAAATATTATATCTTTTTTATAATATAACATAGATACGAGTTTTTATGTTTCTTTGGCA  
ATAGCTTT

GTTTAACATATTTCTGTAGGGTTTTTTTTTTTTTTTTTGTACAGATTAGAAACCATACAGTGTAACCATT  
ATATAGGTCAATTAATATATTTATAGATCATCCTGTCAATTTTTTTTTTATTTTTTTTTGCAAAGCTCCCTT  
TTTCTGA

GGTTACCTGGCTGATTTAGGGTTATATGTACTATTATTAGTATTATTATTGTTAGTATTATTATTATTATT  
ATTATTATTATTATTATTATTATTATTATTATTATTATTATTATTATTATTATTATTATTATTATTAACT  
AAATATTG

AGAAGGAAGCGACACATTTGTGATGCTTTGAGGTCAGTAATGTAATATATATATATATATATATATATATA  
TATTATATAGTGTAACCTGCTCTTATTTATCTTGTCTATTCGAACCAACAAAAAGGCTGCAGTGGAATC  
TGTTTCATG

CTGATTTAGGGTTATATGTACTATTATTAGTATTATTATTGTTAGTATTATTATTATTATTATTATTATTA  
TTATTATTATTATTATTATTATTATTATTATTATTATTATTATTATTATTATTATTATTATTATTAACTAAATATTGAC  
ACTGCTTT

TATATATATATATATATGTTATATTATTGTTAATTAATATTATTATGCGTATTTTCTTTTTCTTTATTAG  
TATAGTATTAATGACAGTAATAATAATAATAATAGTAACAATATCTTTTTTTTTTTTTTTCAGTGAGCTTTTA  
TTTTTTTT

ACACATAAGCAAAAAAAAAAAAAAAAAAAAAAAAAATAAACAAATGAGCAACCCATCAAATACCAAGAACAAGAAT  
TTAATATAATATATAGTTATTAATTTAAATGTATATATGCAGTTCTGCTCTTATTTTGTGACCAATTTCT  
TTAAGTCA

CCAAAAGCAAGCCGATTTTCAGGTTAACCCCTTTATTAAAATAAAAAAAAAAAGCATGCATAAACACTAATAAT  
ATATTATTAAGCAATCTATATTATTTAAATTATCCGAAATTACTTTTATTACATTATGACATT  
CTATAGTC

AGCTGACGATCCAGTCAGCGACATCTGTCTTTTTTTAATTACTATTGCTGTGTACTTATAGAGTCGGTGGC  
ATTTATTTTATTTTATAGTATTTTTTATACGTGCGTATTCTATTGTTCAATTTTTTACCATTTTTTTTTT  
ATTTTTAT

ATTCATAACCAACAGAAAATTTGGAGGAAAACAATGTAGCTGTATAAATATATATATATATATATATATGATG  
TATACTTATTTATTTATATATATATACAAAAGGCTACCAAAAAGATTAGCCGCCGAGGTACATCGTGAGG  
AGTGATAT

TTCTTCATTATTTTTTTTTTTCTTCTTTTATTATTTTTTATGTTTATTCCATATATACACTTATAATTTTT  
TTTTTTCGATTAATAAGTTTGCCTGGATACACGAACATATATATGATTAATAATGGTTGTCTCGAACAA  
AAAAATTC

GGTCATCTAAAGAGGCGCATTTCTCAAAAATGTAGCGTCGCTAAAATGGTTTTCTCTACCTTTAGTTTTAC  
GCCAGATTTTACTAGACGCGTTTTAGTTTACTTTTTCTACCTGTTTCGTTTTTTTTTTTTTTTTTTCGCAC  
CAAATTTT

TAGTATTAATAATACCCTTACTGGTTAAAATGGAATACAGCTCATCCATTTAAAAAAAAAAAAAAAAATAGA  
ATAACAATAATTAAGCAGAAAAATGTTAACGAATATAATAAATCGATTTGTCCATTTTCATAAATTTTTT  
TTTTGTAT

TAAAAGGCGAAGAAGGAAGCGACACATTTGTGATGCTTTGAGGTCAGTAATGTAATATATATATATATATA  
TATATATATATATATATATAGTGTAACTGCTCTTATTTATCTTGTCTATTTCGAACCCAACAAAAAGGCTGC  
AGTGGGAA

TGGGAGAATGAACATATCTGTAATTGTATTATATAAAAGTAGTTAGTTTTTTTTTTTTTTTTTTTTTTTTT  
TTTTTTTTTATGTGTAATGCAAATACAAAAGAAGTGCAGGCATTTTGAAAGTTCACCTCGTATAGGAACTT  
TGATAGAG

CGAAGAAGTTGGTTACCTGGCTGATTTAGGGTTATATGTACTATTATTAGTATTATTATTGTTAGTATTAT  
TATTATTATTATTATTATTATTATTATTATTATTATTATTATTATTATTATTATTATTATTATTATTATTAT  
TATTAATA

AATTACCCTTACTGGTTAAAATGGAATACAGCTCATCCATTTAAAAAAAAAAAAAAAAATAGAATAACAATAA  
TTAAGCAGAAAAATGTTAACGAATATAATAAATCGATTTGTCCATTTTCATAAATTTTTTTTTTTGTATTA  
TTTCATTA

GGAAGGCCACGCTATTGGTAACCATGAAGTGTAAGGCGACGCAGGAGAGATGAAAAGAATGAAATTAAG  
AAATCCAAAAAAAAAAAAAAAAAAAAAAAAAAGAAAAGAAAAGGGGGAATAACACAGCCGCGGGTAA  
CATGAAGC

TATGTATATATATATATATATATACACAGTATTAATATTCTTTCTTGAGATTACTCTATAAAAAAAAAA  
AAAAAAAAAGCTTTTAAAAAAAAAAAAAACTCAAAAAAGAAAAGAAATATTCAAAGAAAGTTTCATCTTGTC  
GTTGAAAT

ACTATTGCTGTGTACTTATAGAGTCGGTGGCATTATTTTTATTTTTTAGTATTTTTTATACGTGCGTATTC  
TATTGTTCAATTTTTTACCATTTTTTTTTTTATTTTTATTTTTGTTTCTTGCGTGGAGTTTTTACAGGAA  
GTTAATCA

ACAAAGAAGCCTCGCAACAAACCAAGATGGATTCAAATGCCTACTTACCGCATTGTATGTGGGAGAATGA  
ACATATCTGTAATTGTATTATATAAAAGTAGTTAGTTTTTTTTTTTTTTTTTTTTTTTTTTTTTTTTTATG  
TGTAATGC

GATGCAGCAAAGTAAAAATAATAGGTAAAAATAATAAAAAATACATGTATCTTTTTGGTTGGTTAATTTAT  
CTAACAGTTTTTATATATATATGTATATATATATATATATATACACAGTATTAATATTCTTTCCTTGAGAT  
TACTCTCT

GCCGATTTTCAGGTTAACCCTTTTATTAAAAATAAAAAAAAAAAGCATGCATAACACTAATAATATATTATTA  
AAAAAAGCCAATCTATATTATTTAAATTATCCGAAATTACTTTTTATTACATTATGACATTCTATAGTCTA  
TGCAAGCG

AACTCGCCTGCACTCCGAAACGAAATGCGATACAGTACGTGTCATGCGGTTAGTATATATACATATATATA  
TATATATATATATTCAAATAAATTATAACGTATTAATAATATGTGAAAAAAGAGGGAGAGTTAGATAGGA  
TCAGTTGG

TTTTTTCAACCTTTTTTTTTATCCGTATATATTAAGGTATGCTATATGTGTATTTTTCCAATGTTTAGTTTT  
ATAATAATACTTCTTCAGCATCAAATATGCTTGCTTATGTAAAAATAACAATCAAGTTTTGTCCCTTGCTTG  
CGCGAAGA

CTTTTTCGGGACGTATTCTCGGGAAATAAGCAGGTCCAGATCCGCGTAGCATGAATGGGGCGCCAAAACAG  
TCGCGGGTAACGAAAGAGCGCAACCACGCGTATATCCGGGCCGGTGAGGGGCAACGCGCATTGTCCCGGG  
GCGATATA

TTGTTCCCCCAAGGACTGCAGTAGAAGAGTTATGTTACAAATGTTGATATATATATATATATATATATAT  
ATATATGTATGGACATTTGTGATGAAAATATATCTTGAACAAGCGCGATTAAGGTCATAATAAAAAATCAC  
AGAAAATT

TGATAAACGTGAAGGGAGTGTATATCTACCGACATAAAGATAGAGATCTTTTTTTTTCTTTATTTTTTT  
TTTTGATTTTTTTTTTTGATTTTTCTTGATATTAGTTTTTAGAAGTCCTTTGACGGGGCAGCCGGAGAATAT  
ATACCAAC

AAAAACGCGTTAAACTTGCATTCCAATTTATCAAAAAGTTTGCCAGGACATATAGGATATAAATGCATTG  
CGAAGTAAACACTTCTCAAAAAATTAATAAAAAAAAAAAAAAAAAATAAACTAACGTATTCATTCTTTTACT  
TTAGTGGA

CGGAGTGCTTGAAGAAAAAATACTGATATAGAACCATAAATGTTTCGGCTTTTAAATACAAATATGTA  
CAGGTGTTAATGTCTAAATAATGATAATCAAACGCGATAATTTTTTTTTTCGCGTTTGTGTTTTGTTTCAGA  
AGAATAAG

GTAGAAATTAATAGTACTCTAAAAAGAAAGAACGGAATAAGAGGAAAAGACCTTTTATCTATTCAAATTGT  
TTCCCTTAGGTATATATATATATATATATATATATATATATATATATATTTTTCCCTGTATATATCTATGTAAATGACGA  
AAACGCAT

TAAGGCGGCAGACTTAAGATCTGTTGGACGGTTGTCCGCGGAGTTTGAACCTCGCATCCTTCAATAACTT  
ATTTTTTTCTCAATCTTCGATATTAGACATTTTTTTTTTTCTATGCCTCCCTTTTCCAAGTAATGTTTTT  
TTTTTTTT

TTATTATAGTTCTATCTTCATGTTTTTTAGAGGTTTTTTTTTAAATGAGTTTATTAAATTAATTTTTGAATG  
TTATTTTTGAATAAAAAATATAAAAAATAATATTAATAATTTTTTCATTAAGTCTCATGATATCAGTGCA  
TTAGAAAA

CCAATATATGCATGGGCTGAGATAGAGGTACAAGGAATTTGTAAATCAGTAAAAAAAAAATAAACAGTTT  
TTTTTTTTCATTTTTTTTTTTTTATTCTTATTTATGTATGATACTTTATTATTATTTCTCTTAATTATTTAT  
TTATTTAA

CCAGTACGCCAATAAAGTGTGTCGCGCAGAATAGATCTTCATGTAATTCCTTTTTCCCTTTTATGCAATCT  
ATAATGTTAATCAGCGTAGATCACTATATACGCTTTTTTTTTTTTTTTTTTTCAGCTCCGATTAGAGAGCAAAA  
GAGATGTA

ACTTTCTCTTTTTTTTTTTCACACGCGTTTGCAACATGCCCGTATTACATGAGCTTATTTGACTTTAGATGGT  
TTTCAGTTCTTTTTTTTTTTTTTTTTTTTTTTTTTTTTCAGTAGATTAATGCGAAGAGTTAAATCACCAATTCAAAGA  
TGGCAGAT

ATAAAAAGCATTACCGTACGCATCGTGTTGCAAATAGCATATACATATATATATATATATATATATACATAT  
AACGTATACGTTAGAAAAATTTGAATACACACATTCATTTATCCTATTATTATCATTTCATTCTTACCCG  
CTCCCCGC

CTCCAATTGGGCGAGAATATTTTTTTTGCCACCACGATTAGACTCCACTTTGCTTCTATAGTCTATCTATT  
GTTCTTTTTTATTCTAGCATAACCTTATTGTATTGTTCTTTTTCTTTTTCTTTTTCTTTTTTTTTTTTTTT  
TTTTTTTT

GATAGAGGTACAAGGAATTTGTAAATCAGTAAAAAAAAAATTAACAGTTTTTTTTTTTTTTCATTTTTTTTTT  
TTATTCTTATTTATGTATGATACTTTATTATTATTTCTCTTAATTATTTATTTATTTAACTAACACGATGA  
GCACTTTT

TCTATCTTCATGTTTTTTAGAGGTTTTTTTTTAAATGAGTTTATTTAAATTAATTTTTGAATGTTATTTTTGA  
ATAAAAAATATAAAAAAATAATATTAATAATTTTTTCATTAAGTCTCATGATATCAGTGCATTAGAAAATC  
TTTTGGTT

AATTTTTTTAAATTAATTGATTAATTAATATTTTGTATCTAAAGTGTTTCATACTATATTATTTACTTAGAT  
TATACATAATTAAAAAAAAAAAAAAATTTTTCTTGTTTTTCATTTTGTTTTTATTATTAATATTAATAA  
AAAGTGTC

AAAGTGTTTCATACTATATTATTTACTTAGATTATACATAATTAAAAAAAAAAAAAAATTTTTCTTGT  
TTCATTTTGTTTTTATTATTAATATTAAAAAAAGTGCCATAACATCAATGTTTTTTTTTACCTTTGATT  
AGTTTTCA

AAAAAGGTGAGCGCTATATAGATTTAGTAATTTACATGTTACAGAAGCAAAAAGCAAATATATATATATATTT  
TTTATCATATTAGTTTTTATCCTCAGTAGTACTACTGAAATAATAATCTCAGATTTTTTTTTTTTTTCACTTGC  
CGAGGGAC

TAATGATATAAAAAATTATAAGTTTCTCCTTTTCGGAACATAAAAAATAATATTAATAATAATATATAAATATT  
ATATCTTTTTTATAATATAACATAGATACGAGTTTTTATGTTCTTTGGCAATAGCTTTTCGTGACTTGTT  
TTAAATAC

AAGGCTTGTGCTGATCGAACGAAGCAAATCCTACGAGTAAATACATAAGCGTATACATATATATATATATA  
TATATATATATATATATATATGTATATATATATATGTGTGTGTGTGTAATTGTGTGTATTCAACTGAACATG  
AAGAGTCT

AAAGGAGTTGAAATTAAAAAATAATAATAAATAATGATATAAAAAATTATAAGTTTCTCCTTTTCGGAACAAA  
AAATAATATTAATAATAATATATAAATATTATATCTTTTTTATAATATAACATAGATACGAGTTTTTATGT  
TCCTTTGG

GCAGCAACAACGATGCATAATTGGCATCTAGCCCCAATGACGATACACTAATATATATATATATATATATA  
TCTATATATCTGCAAGAAATAAGCGTGTGTAGTAAGTAAAAGGAAAAATAGAAATTTTTGCTCAAAAATAA  
CGGTCCCA

TGCTACTTTCCCGGTTCTCCCTTTATTATAAACACTTCAGAAAAATATTCTGCTACTATTTCTTACTTTAC  
TATAAGAATTTTGTTCACAAAAAATAAATAAATAAATAAATAAATAAATAAATAAATAAATAAATAAATAA  
AGAAAAAC

TTTATACCTCTATACGATTATTAAGGGAGGGTAATACTTTCTCAATTTTTTTTTTTTTTTCAGTTTTTAATATT  
ATTTCTTAAAGATTTTTTCGGTGGCGTTTCGCGACAACCTTACGAGAAAAAATAAAGAGGAGACTTGAAGA  
AAGAGTGTC

GAAAAAGAAGCACAATATAGGAAAGCGTTCTAATTAACATAAGAAAAAATAAAAAAAAAATAAAA  
AAAAGGTAACATAAAAGGACAAAAACATAACAGCTGTTTATAAAGTACTTTATACGTAAGAACTACTGG  
CACTATTC

TCCGCGTAGCATGAATGGGGCGCCAAAACAGTCGCGGGTAACGAAAGAGCGCAACCACGCGTATATTCGG  
GCCGGTGAGGGGCAACGCGCATTGTCCCGGGCGATATAATCCATGTACCGGAACCCGCACTTTTTTCGACT  
TTCTTTCC

AGTTAAGAAAAAGTCTAAAAATGGTTTTTTTTTCATCCAAAATATTAATTTTTACTTTTTATTACATACA  
TTTTAACTAATATACACATTTTAGCAGATGCGCGCACCTGCGTTGTTACCACAACCTTTATGAGGCCGCG  
GACAGCAT

AACTATTCTTTTTATGAATTGACAGAAAACAAAAGCAAGCCGATTTTCAGGTTAACCTTTATTAAAATA  
AAAAAAAAAAGCATGCATAACACTAATAATATATTATTAATAAAGCCAATCTATATTATTTAAATTAT  
CCGAAATT

TTAATATGAGAAAAAGGTGAGCGCTATATAGATTTAGTAATTTACATGTTACAGAAGCAAAAAGCAAATAT  
ATATATATTTTTTATCATATTAGTTTTTATCCTCAGTAGTACTACTGAAATAATAATCTCAGATTTTTTTT  
TTTCACTT

AAATTCCTAAAGTTATAGTTTACATTGTTATATATGTATCTATAAAGCGAAATTTTTTAAAATTAATTGAT  
TAATTAATATTTTTGTATCTAAAGTGTTCACTATATTTACTTTAGATTATACATAATTAATAAAAAA  
AAAATTTT

TTGGATTTTCGTTTATTAGCTGTTTAAACATATTTCTGTAGGGTTTTTTTTTTTTTTTTTGTACAGATTAGAA  
ACCATACAGTGTAACCATTATATAGGTCAATTAATATATTTATAGATCATCCTGTCAATTTTTTTTTTATT  
TTTTTTTTG

CAAACAGGCGTATGATTGTCGTATATAACAGGGCACTTTTCGGCAGTGAATCAATAGGAGGCGTATAAGAAA  
AGCCAATTAGTACCTATATATATATATATATATATATATATATATATATATATATATATATATATATAT  
CAGCGATT

CGAGTCACTTATTTTTTTTTTTCTTCTGAAAAAATTAATTAGATTAATTTCAATTAATATCATTTCCGCTTA  
TCTGACTTCTTTTCAATTTTTTTTTTCTTATATTTTCGCGTTTACTAGGAAAGAAAAGGAAAAAATTTTTCC  
CCTCCATC

CATGGGCTGAGATAGAGGTACAAGGAATTTGTAAATCAGTAAAAAATAAATTAACAGTTTTTTTTTTTTCA  
TTTTTTTTTTTTTATTCTTATTTATGTATGATACTTTATTATTATTTCTCTTAATTATTTATTTAATTA  
AACACGAT

CAGGTAAGTCTAATTTATTTAAAAAATCCACGAGCATATAGATTTATAACAATAATAATAATTAATATTC  
ATCAATTTTTTAGTAAATTCATATATTTTACTCCTACTCTATGATTTTTCAGTAAGTCTACTAGTCGATT  
ACCCGTCG

TTTCTTGAAATCTTCGAAAACGATGAGAATTTCTTATTATTTTTTTTTTTCTTCTTTTATTATTTTTTAT  
GTTTATTCCATATACACTTATAATTTTTTTTTTTGCGATTAATAAGTTTGCCTGGATACACGAACAT  
ATATATGA

CGCGAAAAGAAGGGTACGGCGTAATCACCCACACGGCTTGTATTTTTTTTCGGAGAATAAGTCATAGACG  
TAATGCTAATTTTTCCGTCTAGCCGATGTTTATGCGGCTTTTATTTTTTTTTTTTTTTTTTTCTCATCTTT  
GTTCTTCC

CACTCCGAAACGAAATGCGATACAGTACGTGTCATGCGGTTAGTATATATACATATATATATATATATATA  
TATTCAAATAAATTATAACGTATTAATAATATGTAAAAAAGAGGGAGAGTTAGATAGGATCAGTTGGTC  
AACTCATG

ATTTTATGCGTGGGTGACTTCAATTTGGCGCCCGTTGAGATTATCTAAAAAATGCTTTTATTTATTTAAG  
CGCTTTTTGTTTTGACGAATGTATTTATGTTTTTGTATATATATGAGCGTTTTTTTTTTTCCAGATTTAACT  
AGTTTTCT

GTCGCGCAGAATAGATCTTCATGTAATTCCTTTTTCCCTTTTATGCAATCTATAATGTTAATCAGCGTAGA  
TCACTATATACGCTTTTTTTTTTTTTTTTTTTCAGCTCCGATTAGAGAGCAAAAGAGATGTAACATCGATCCTG  
CTATAATT

TTTACTTAGATTATACATAATTAATAAAAAAAAAAAAAAATTTTTTTCCTTGTTTTTCATTTTGTTTTTATTATT  
AAATATTAATAAAGTGTCCATAACATCAATGTTTTTTTTTACCTTGATTAGTTTTTCATTGGCGAAACCA  
TAATCCCC

GTTATATGTACTATTATTAGTATTATTATTGTTAGTATTATTATTATTATTATTATTATTATTATTATTATT  
TATTATTATTATTATTATTATTATTATTATTATTATTATTATTATTATTATAATACTAAATATTGACTGCTTTAC  
GCACTAGA

GCATTTTTAAAGAATAAATATTACTTTTTTCGAAATCTGGTGTTTAAATATTTTTAAGAAAGTTAAAAAAT  
AAGGAATATTTGATAAACAAAAAATAGCCTTTATATATCCATTTTTGTTTATGTATTCCTTTTTTTTA  
TTTTCTTA

AGCACGTTTGTTAAGATCTTCACTCTGTACACGCTATATACTAAATAACAATAAGAAAAAGAAAAAGAAGC  
ACAATATAGGAAAGCGTTCTAATTAACATAAGAAAAAATAAATAAATAAATAAATAAATAAATAAATAAATA  
AAAAAGGA

AGAGGCGCATTTCTCAAAAATGTAGCGTCGCTAAAATGGTTTTCTCTACCTTTAGTTTTACGCCAGATTTT  
TACTAGACGCGTTTTAGTTTACTTTTTCTACCCTGTTTCGTTTTTTTTTTTTTTTTTTCGCACCAATTTTTT  
AACCGTTC

AAATTAGAGGGAAAAAGTAACTAAATATATATTAATAAAAAAAAAAAAAAATAAATGTATGTTGGAATGAAAT  
AGCGTAGTAAGGATAAAGGTGTAATAGATATATATTATAAGAAATAATCCGGTGTCTTCCCTGGTGACGGTT  
GGTTCACC

CACATGCAGTAATAGGTATAAAAGGAGTTGAAATTAATAATAATAATAATAATAATGATATAAAAAATTATAAG  
TTTCTCCTTTTCGGAATAAATAAATAATAATAATAATAATAATAATAATAATAATAATAATAATAATAATA  
ATAGATAC

AAGCAACGCGACCGTTCGTGGGTTCAAACCCACCTCGAGCACTTTCTCTTTTTTTTTTTCACACGCGTTTGCA  
ACATGCCCGTATTACATGAGCTTATTTGACTTTAGATGGTTTTTCAGTTCTTTTTTTTTTTTTTTTTTTTT  
CAGTAGAT

GTCGTGTAAGTGTGCGCCCGAACTTGATTCCCCCGGACTAATTAGAAGTTCCGAGAACGCGCGCAAGC  
CGTCCCGCGCGTAGAAGGCTAAAAGCAGCCGGAGGAAAAAATAACGCAATGTGGGCTCCCTTTCCCT  
TGTGCGGC

AACCATAGATGGTCATCTAAAGAGGCGCATTTCTCAAAAATGTAGCGTCGCTAAAATGGTTTTCTCTACCT  
TTAGTTTTACGCCAGATTTTTACTAGACGCGTTTTAGTTTACTTTTTCTACCCTGTTTCGTTTTTTTTTTTT  
TTTTTCGC

TTTTATGAATTGACAGAAAACAAAAGCAAGCCGATTTTTCAGGTTAACCTTTTATTAATAAAAAAAAAAAAA  
GCATGCATAACTAATAATATATTATTAATAAATAAATAAATAAATAAATAAATAAATAAATAAATAAATA  
TTTTATTA

ACTGGTTAAATGGAATACAGCTCATCCATTTAAAAAATAAATAAATAAATAAATAAATAAATAAATAAATA  
AAAATGTTAACGAATATAATAAATCGATTTGTCCATTTTCATAAATTTTTTTTTTGTATTATTTTCATTATC  
TGTGCCTC

GTGTCGGCCCGGAACTTGATTCCCCCGGACTAATTAGAAGTTCCGAGAACGCGCGCAAGCCGTCCCGCGC  
GTAGAAGGCTAAAAAGCAGCCGGAGGAAAAAATAACGCAAATGTGGGCTCCCCTTCCCCTGTGCGGCCA  
CGTCGTGC

CATACGTATGGTATACAGTATCAAAAGTAGCAGAATTTGTCTTCATTATGATATATATATATATATGTACA  
TATATATAGGGTGCTAAAAAGTATTCTTTTTTGCTATTATTATTGCTTAAATCGCCGACCTTTTTTCCCATTG  
TCACGAGA

GTATACAGTATCAAAAGTAGCAGAATTTGTCTTCATTATGATATATATATATATATATGTACATATATATAGG  
GTGCTAAAAAGTATTCTTTTTTGCTATTATTATTGCTTAAATCGCCGACCTTTTTTCCCATTGTACAGAGA  
ATAATTGT

TAAAAAGGCTTTAATATGAGAAAAAGGTGAGCGCTATATAGATTTAGTAATTTACATGTTACAGAAGCAAA  
AAGCAAATATATATATATATTTTTTATCATATTAGTTTTTATCCTCAGTAGTACTACTGAAATAATAATCTCA  
GATTTTTT

AAACGTGTAGTATTATTATTATTATTCTATTTCCCTTTCCGTTTTTATTATTTATATATATATATATATATA  
TATATATTTGGGTGTTTATATTTAGGTAGGGCATAAGGATTTACTGTTCGGCATGAACCTACTTGAACAAAA  
AAATAAAA

TTTTTTTTTTATTTTTTTTTTGCAAAGCTCCCTTTTTCTGAAACCAACAACAAAATATAAAAAAAAAAATGAT  
AAGCAGGATTTTTCTTTTAATAATTCCTTAAAATTAACAAAGCTGAAGCCCTTACAACAAAGTAAGT  
CAAACCCA

GATTTTATTTTCTCAATGTGCTCGTGTAAGTGTGCGCCCGGAACTTGATTCCCCCGGACTAATTAGAAG  
TTCCGAGAACGCGCGCAAGCCGTCCCGCGCTAGAAGGCTAAAAAGCAGCCGGAGGAAAAAATAACGCA  
AATGTGGG

TAATAATAAATAATGATATAAAAATTATAAGTTTTCTCCTTTTCGGAACATAAATAAATAAATAAATA  
TATAAATATTATATCTTTTTTATAATATAACATAGATACGAGTTTTTATGTTTCTTTGGCAATAGCTTTTC  
GTGACTTG

AATAAAGTGTGTCGCGCAGAATAGATCTTCATGTAATTCCTTTTTTCCCTTTTATGCAATCTATAATGTTAA  
TCAGCGTAGATCACTATATACGCTTTTTTTTTTTTTTTTTTTCAGCTCCGATTAGAGAGCAAAAGAGATGTAAC  
ATCGATCC

ACCTTGCTTAATCATCTTTGAAGGCTTGTGCTGATCGAACGAAGCAAATCCTACGAGTAAATACATAAGCG  
TATACATATATATATATATATATATATATATATATATATATATATATATATATATATATATATATATATAT  
GTGTATTTC

ACACCTTTGGAGCACGTTTTGTTAAGATCTTCACTCTGTACACGCTATATACTAAATAACAATAAGAAAAAG  
AAAAAGAAGCACAATATAGGAAAGCGTTCTAATTAACATAAGAAAAAATAAATAAATAAATAAATAAATAA  
AAAGGTAA

AAAATAGTTTGTATGTTTGTATATAAGTTGTTATTATCAAAAATTAGAGGGAAAAAGTAACTAAATATATA  
TTAAAAAATAAATAAATAAATAAATAAATAAATAAATAAATAAATAAATAAATAAATAAATAAATAAATAAATA  
ATATTATA

GTATGTTTGTATATAAGTTGTTATTATCAAAAATTAGAGGGAAAAAGTAACTAAATATATATATTAATAA  
AAAAAATAAATAAATAAATAAATAAATAAATAAATAAATAAATAAATAAATAAATAAATAAATAAATAAATA  
AAATAATC

TTCCGCCAGCGGGAAGTACGCGGAAAAACAAGAAACAAAAAATAAATAAATAAATAAATAAATAAATAAATA  
CTAAAATCTGATGATGAAATTGATATTTCAATTGGAGAAAGAAGAAAGATCTTGTTTAATTTGAAATAAAG  
CAAGAAGA



AATATAATGGACACATAAGCAAAAAAAAAAAAAAAAAAAAAAAAAAATAAACAAATGAGCAACCCATCAAATACCAAG  
AACAAAGAATTTAATATAATATATAGTTATTTAAATTTAAATGTATATATGCAGTTCTGCTCTTATTTTGTG  
ACCAATTT

CTATTATTAGTATTATTATTGTTAGTATTATTATTATTATTATTATTATTATTATTATTATTATTATTATTATT  
ATTATTATTATTATTATTATTATTATTATTATTAATACTAAATATTGACTGCTTTACGCTAGATT  
GTGCGGGT

ACTGAAGTGCAGCTGACGATCCAGTCAGCGACATCTGTCTTTTTTTAATTACTATTGCTGTGTACTTATAG  
AGTCGGTGGCATTATTTTTATTTTTAGTATTTTTTATACGTGCGTATTCTATTGTTCATTTTTTTACCAA  
TTTTTTTT

AAGCCAATTAGTACCTATATATATATATATATATATATATATATATATATATATATATATATATATATATAT  
TCAGCGATTTTTGCATCACACCAAGAAAAATCTATAATAGAGACACAAAAAATGAACGTAACGAAAT  
GCTCTATT

AATGTTGATATATATATATATATATATATATATATATATATATATATATATATATATATATATATATATAT  
AAGCGGATTAAGGTCATAATAAAAAATCACAGAAAATTTTTTCAGGTCGCGGGCGTTCTCTCACCCGGCCG  
CCCAAAGT

GAAGGGAGTGTATATCTACCGACATAAAGATAGAGATCTTTTTTTTTCTTTATTTTTTTTTTTGATTTT  
TTTTTTGATTTTCTTGATATTAGTTTTTAGAAGTCCTTTGACGGGCAGCCGGAGAATATATACCAACGG  
CATTCTAT

CGATCGAGTAATCGAATTTACGTAGCCCAATCTACCACTTTTTTTTTCTTTTTTAAAGTGTATACTTA  
GTTATGCTCTAGGATAATGAACTACTTTTTTTTTTTTTTTTTACTGTTATCATAAATATATATACCTTAT  
TGTTGTTT

AGTAAACAACCAATATATGCATGGGCTGAGATAGAGGTACAAGGAATTTGTAAATCAGTAAAAAAAAAAAA  
TTAACAGTTTTTTTTTTTTCTTTTTTTTTTTTATTCTTATTTATGTATGATACTTTATTATTATTTCTCTT  
AATTATTT

AAGCAAATTGCAAAGCCGCGGCTTCCCGGAAAAAAAAAAGGAAGCCACGCTATTGGTAACCATGAAGTG  
TAAGGCGACGCAGGAGATGAAAAGAATGAAATTTAAAGAAATCAAAAAAAAAAAAAAAAAAAAAAAAAAAG  
AAAAAGAA

GTAATCACCCACACGGCTTGTATTTTTTTTCGGAGAATAAGTCATAGACGTAATGCTAATTTTTCCGTCT  
AGCCGATGTTTATGCGGCTTTTATTTTTTTTTTTTTTTTTTTCTCATCTTTGTTCTTCCGGTTTCCAAGAT  
GTCTCACA

GATACAAAATTCTATGTAACATATTTTTCCAGTCACTATCATCATCATATTTTGTATATATACATT  
TATTATATAAAATATCATACCAATTTTTGCCAAGAACACCGTTTTCCCTCTTTCGCGTTGACCACAGTAATT  
GCAGAAAC

CACAATATAGGAAAGCGTTCTAATTAATAAGAAAAAAAAAAAAAAAAAAAAAAAAAATAAAAAAAAAAAGGTAAC  
TAAAAAGGACAAAAACATAACAGCTGTTTATAAAGTACTTTATACGTAAGAACTACTGGCACTATTCAT  
TCCAATAA

TATATATATATATATATATATATATATATATATATATATATATATATATATATATATATATATATATATAT  
AAGGTCATAATAAAAAATCACAGAAAATTTTTTCAGGTCGCGGGCGTTCTCTCACCCGGCCGCCAAAGTAT  
TATATGAA

GGCCGTTGATATTTTCGCGATGGTATGCCGAAAAAGGAAATAACGCAGATTGCGCGTAGTAACGAATGGATT  
TGACGCGTTTTCTTCGATGAAAAGTGGGAAATAATAATAAAAAATTTCTTGTGACGACGAACTTGGCGCAA  
ACAAATGA

TTTAATTGCTTGCAAAAGGTCACATGCTTATAATCAACTTTTTTAAAAATTTAAAATACTTTTTTATTTTT  
TATTTTTAAACATAAATGAAATAATTTATTTATTGTTTATGATTACCGAAACATAAAACCTGCTCAAGAAA  
AAGAACT

TACGCTAGATGTTTCGAACCACCCAGGTACACTGTCATTATTAGTAGTACATATATATATATATATATAT  
AATTATCATTAAAAGGAGATATATTACTGATAATCAAAATAGTAAAACTACATCCGGAGTATGACAGTC  
CAACGATT

TAATCAGCGAAAAAATGGCGAGGTGAAAAAATCGATGAGATGAAAAATTTTTTACTAGTAAAGGCGTA  
TTGATGATATATTAGCAGCTAAAGTATAGCAAGGTTTGTCAATTTGAAGCAGTCCGCGTGTTCACATGA  
GCGTCATT

GTGGGTAAATGATATATAAATTTTTATAAAAACTCTTGGCCAAGAAAAAAGACTATGTCTAAACG  
TAACGTTATCATTATTATTAAATCATTTTAATGTTTTATAAGTTTTGTTTTTCATTTTCATACCCTTAAG  
AGCATTG

TGAGAACAGTAATATATGAGAAAAAGTTGTTTTCACTTTGTGTTTCGAAAAATAAGTATTTGAAAACGAAA  
AAATAGTTTGTATGTTTGTATATAAGTTGTTATTATCAAAAATTAGAGGGAAAAAGTAACTAAATATATAT  
TAAAAAA

ATAGTAGTCAGATACAAAAATTCATGTAACATATTTTTTCCAGTCACTATCATCATCATATTTTTGTA  
TATATACATTTATTATATAAAATATCATACCAATTTTTGCCAAAGAACACCGTTTTCCCTCTTCGCGTTGAC  
CACAGTAA

GCATATAAAGTATTCAAAAAGGTGTTGAAAGCTCTTCCTGTATATGACCCTGTATTTAATGTACGCGTTA  
AAAAATTTTTTATATTTTTAAATAAGTATCAACTTGATAATATGATCTTGCCCGCAAGGTGGTTTTATATG  
AATAATTA

TGATTTTCATTTCCCGCCTCTTAAATAAAAAACAATTACCACTGCAAAAATGTTCTTCAAACGCGTTTATTAT  
ATAATGAAAAAGAAATTCAAATTTTTTCGCGTTTTGAAAATTTATGCTAAACAAATAACTCGAGGAGGGACGC  
GTCGAGAA

AGGGAAAGAGCGAAGAAGTTGGTTACCTGGCTGATTTAGGGTTATATGTACTATTATTAGTATTATTATTG  
TTAGTATTATTATTATTATTATTATTATTATTATTATTATTATTATTATTATTATTATTATTATTATTATT  
ATTATATT

CATTTATTTTTATTTTTTAGTATTTTTTTATACGTGCGTATTCTATTGTTTCATTTTTTTTACCAATTTTTTTT  
TATTTTTATATTTTGTTCCTTGCGTGGAGTTTTTACAGGAAGTTAATCACAACAGAGGGTTCAATCTCCAA  
GGCATAAA

TTCTTCGACTTTCTTGAAATCTTCGAAAACGATGAGAATTTTCATTATTTTTTTTTTTCTTCTTTTTAT  
TATTTTTTATGTTTATCCATATATACACTTATAATTTTTTTTTTTTTGCGATTAATATAAGTTTGCCTGGAT  
ACACGAAC

ACAAAACCTTACAAATAAATGATTAATTTTAGACAATATTTTTTTTTTTTTTTTTATTATGTATATAGTTAA  
CATGTATAAAGTAATAGCAGATTCTCTCTAAAAATATAACATAACATTTTCATTTCAATTCGTAATAATAA  
TTTTTTAT

GAGTCGGTGGCATTATTTTTATTTTTTAGTATTTTTTTATACGTGCGTATTCTATTGTTTCATTTTTTTTACCA  
ATTTTTTTTTTATTTTTATATTTTGTTCCTTGCGTGGAGTTTTTACAGGAAGTTAATCACAACAGAGGGTT  
CAATCTCC

AATTTTTTTGTCATTTCTTCGAATCAACTCAATGAAATTTGAAAAATAGCAGAAAATAAGTTGATAAGATC  
GCAATGTAATATATATATATATATATATATATTACAATTCGTGAACTGGCACAAGGAAAAGCGTGAATTA  
AAAATGTT

GAAAAAGTAACTAAATATATATATTAATAAAAAAAAAAAAAAAAAATAAATGTATGTTGGAATGAAATAGCGTAGTAA  
GGATAAAGGTGTAATAGATATATATTTATAAGAAATAATCCGGTGTCTTCTGGTGACGGTTGGTTCACCGG  
GTCTCACA

CGAGTTCGAACCTCGCATCCTTCAATAACTTATTTTTTCTCAATCTTCGATATTAGACATTTTTTTTTT  
CCTATGCCTCCCTTTTCCAAGTAATGTTTTTTTTTTTTTTTTTTTTTTTTTTAGCTCCTCTCACAAAAGTACTG  
AGGACTGA

TGTGGTTCATGCTGAGAGGAAACACTGCTAAAGCAACCTATGACCTGTACACTAATTAAAACACTTTTATC  
CATTTTTTTTCGTATAAGCATATTTTACATCTTTATATATATTTATTTTTTTTTTTTTTTTTTTTTTTGGTAGAA  
TAGATTAC

TATCAAATAGTAAAAAACTTTGGAAGCGTGCACACTCAGTCTTAAATCTGCCCTATACTACCGAAGATA  
AATACATGAACTACACGTATCATATAACATCATATCCTTTTTTTTTTTTTTTTTTTTTTTTTCTAGGCTTTT  
ACTAATAC

AGTGCTACATAAAAACGCGTTAAACTTGCATTCCAATTTATCAAAAAGTTTGCCAGGACATATAGGATAT  
AAATGCATTGCGAAGTAAACACTTCTCAAAAATTAATAAAAAAAAAAAAAAAAAATAAACTAACGTATTAC  
TTCTTTTA

ATCTTTTCTCCACATGCAGTAATAGGTATAAAAGGAGTTGAAATTAATAATAATAATAATAATGATATAA  
AAATTATAAGTTTCTCCTTTTCGGAATAATAATAATAATAATAATAATAATAATAATAATAATAATAATA  
ATAATATA

GAAAGCGTTCTAATTAACTAAAGAAAAAAAAAAAAAAAAATAAAAAAAAAATAAAAAAAAAAGGTAACAAAAAGGAC  
AAAAACATAACAGCTGTTTATAAAGTACTTTATACGTAAGAACTACTGGCACTATTCATTCCAATAAAA  
GGACAGGT

CATACATATATATATATATATATATATATGTTATATTATTGTTAATTAATATTATTATGCGTATTTTCTTT  
TCTTTATTAGTATAGTATTAATGACAGTAATAATAATAATAATAATAATAATAATAATAATAATAATAATA  
TGAGCTTT

GTTCAAGAGATGATAACGTGAAGGGAGTGTATATCTACCGACATAAAGATAGAGATCTTTTTTTTTTCT  
TTATTTTTTTTTTTGATTTTTTTTTTTGATTTTCTTGATATTAGTTTTTAGAAGTCCTTTGACGGGCAGC  
CGGAGAAT

AACATATCTGTAATTGTATTATATAAAAGTAGTTAGTTTTTTTTTTTTTTTTTTTTTTTTTTTTTTTTTAT  
GTGTAATGCAAATACAAAAGAACTGCAGGCATTTTGAAAGTTCCTCGTATAGGAACTTTGATAGAGAG  
GCAATTCC

AGTATTATGTGTCATAATTTGTAGTATTATCTGTGTGACGGATTAAGTTTGCTATCTCAAATGCCGCGCGC  
GCGAATTGCTCATGATATAATAATAGCTAATAATATGATAATATGATAATAATAGATAAGATTACTGATAA  
CATTATTT

TACCCTGTTTTTCTTTGTCGTTTTCTTCTATAATGAACAATTTACTTTACGGTCTTTAATCGATTTTAATG  
ATTAGTTGGCTTTTGGCTACATATGTAATAATTACATATAATATAATGGACACATAAGCAAAAAAAAAAAAA  
AAAAAAA

TTTATTAGCTGTTTAAACATATTTCTGTAGGGTTTTTTTTTTTTTTTTTTGTACAGATTAGAAACCATACAGT  
GTAACCATTATATAGGTCAATTAATATATTTATAGATCATCCTGTCAATTTTTTTTTTATTTTTTTTTTGCA  
AAGCTCCC

GTTTCGAACCACCCAGGTACACTGTCATTATTAGTAGTACATATATATATATATATATAAATTATCATT  
TAAAAGGAGATATATTACTGATAATCAAATAGTAAAACTACATCCGGAGTATGACAGTCCAACGATTAT  
GTAGTATA

GGTGGCCTTCTTCGGTAACTAGGGGATAAGGGGCTTCGTCTACACGATGCTCCTGTGCTTTCTTTTTTTC  
ATTTCTTTTTTCGCCAGCGGGAAGTACGCGGAAAACAAGAAACAAAAAAAATAAAAAATAAAAAATA  
AAACAGAA

AATTACTTTTTGAAAAGGAAAAATATTCAGGTTTGTGTTTTTATGTAAGTTGTATGATTTGATATACATA  
TATATATATATAATATATATATTGTACATGTGTTTTTCCGGGGAAGAATGGATTATCCGGAGGTGTGAATA  
AAATGATG

TTTGTCTTGTCTTTCTTTCTTATTTATATATATATATATATATATAAATACTACTATGTTATATTA  
CATTATATTATTATCACAATAATTATTACGTTTCATCGTGCCGAAACGTCACCTCCCACGGTTTGGATCTAT  
TGAAAGAG

CTTTGACAAAATTCCAGCCATTTTTTCAACCTTTTTTTTTATCCGTATATATTAAGGTATGCTATATGTGTA  
TTTTCCAATGTTTAGTTTTTATAATAATACTTCTTCAGCATCAAATATGCTTGCTTATGTAAAAATACAAT  
CAAGTTTT

TTCAATAACTTATTTTTTCTCAATCTTCGATATTAGACATTTTTTTTTTCTATGCCTCCCTTTTCCAA  
GTAATGTTTTTTTTTTTTTTTTTTTTTTTTTTAGCTCCTCTCACAAAAGTACTGAGGACTGAAATGTAAAACT  
AATAACAC

TCGGGTGACTTCAATTTGGCGCCCGTTGAGATTATCTAAAAATGCTTTTTATTTATTTAAGCGCTTTTTGT  
TTTGACGAATGTATTTATGTTTTTGTATATATATGAGCGTTTTTTTTTTCCAGATTTAACTAGTTTTCTTT  
TTCACCTG

TTAAAGTTTTTTTTTCCAGTTCTTTTTTCCCATCGTTTTTTTTTCTAGAAGCCGGGTTTTTACCCTCAA  
AAAATTTCTAAAAAGATCTGTCAATCATTAAGTTTTGCTTTTTTCGGCTTTTAAGCCATGCTTTCAGGCA  
AAAATTAA

ACTGTCCTCCGTTCTGTAAAATTCACGCTCTTAGTCCCTTTTCATAATTCCTTAACTTTTTGCGTACAAAA  
TGATATGTTTATTATATTTTTCTTTTTTTTTTTTTTCAAATTTTTTCTTTTTCTTGAAAAATTTTTCAAATTG  
GAAAGCTC

ACTAGAAAAGGTTCAAGAGATGATAACGTGAAGGGAGTGTATATCTACCGACATAAAGATAGAGATCTT  
TTTTTTTCTTTATTTTTTTTTTTTTGATTTTTTTTTTTGATTTTCTTGATATTAGTTTTTAGAAGTCCTTTG  
ACGGGGCA

TGCCGCGCGTTTGAAAGGAAACTGATCTGAAAGTGATTTATGATGCCAAAAAAAAAAAAAAAAATCTTTTGAA  
GTACAATGTATGTATGCATGAGTTTATAAAAAATGATGTAAAGTGCGGAATAGTAGTACTGCTAATGAGAA  
AAACACGG

AGGGTACGGCGTAATCACCCACACGGCTTGTATTTTTTTCGGAGAATAAGTCATAGACGTAATGCTAAT  
TTTTCCGTCTAGCCGATGTTTATGCGGCTTTTATTTTTTTTTTTTTTTTTTTCTCATCTTTGTTCTTCCGG  
TTTCCAAG

CTAAAATGGTTTTCTCTACCTTTAGTTTTACGCCAGATTTTTACTAGACGCGTTTTAGTTTACTTTTTCT  
ACCCTGTTTCGTTTTTTTTTTTTTTTTTTCGCACCAAATTTTTCAACCGTTCCATGGAAGCCGGGATCGACCGT  
CCTACACT

ACTGAAGCCGTTATTATAGTTCTATCTTCATGTTTTTAGAGGTTTTTTTTTAAATGAGTTTATTAAATTA  
ATTTTGAATGTTATTTTTGAATAAAAAATATAAAAAATAATATTAATAATTTTTTCATTAAGTCTCATGA  
TATCAGTG

ACGAGGCCCTATAAAAAGCATTACCGTCACGCATCGTGTTGCAAATAGCATATACATATATATATATATAT  
ATATACATATAACGTATACGTTAGAAAAATTTGAATACACACATTCATTTATCCTATTATTATCATTTTTCA  
TTCTTACC

TTCGTTACCTTGGAAATGGTATGTAAAGTGATAAAAAATATACACGTATATATATATATATATATATATATATAA  
GTACGTGAGATCTATTTGTATAATATAATGCTAATAAAATAGTATCAACGATACTGTTGATAAAGGTAAGT  
CGATACCT

AACTGCATTACTTTTTTCGGGACGTATTCTCGGGAAATAAGCAGGTCCAGATCCGCGTAGCATGAATGGGGC  
GCCAAAACAGTCGCGGGTAACGAAAGAGCGCAACCACGCGTATATTCCGGGCCGGTGAGGGGCAACGCGCA  
TTGTCCCG

TAATTTATTTAAAAAAATCCACGAGCATATAGATTTATAACAATAATAATAATTAATATTCATCAATTTTT  
TAGTAAATTCATATATTTTTACTCCTACTCTATGTATTTTTAGTAAGTCTACTAGTCGTATTACCCGTCGGT  
TTCAAGGG

AACAGAAAATTTTGGAGGAAAACAATGTAGCTGTATAAATATATATATATATATATATATGTATGTATACTTATT  
TATTTATATATATATACAAAAGGCTACCAAAAAGATTAGCCGCCGAGGTACATCGTGAGGAGTGATATTC  
TGGGGAAA

AGGAAAAAAGAAAAGAAAAAAATTTGGGAAGAATGGGGATAAAAAAGATTTGTAACATTATAAACAAAA  
ATAAGAAATAATTGTTTTTACGTACTTATTGTAAATAAAACAAAGGGATAACGGACAAAAAGGCATCGTTTT  
CTTTTTGTA

GAAACATGAAGATGCAGCAAAGTAAAAATAATAGGTAAAAATAATAAAAAATACATGTATCTTTTTGGTTG  
GTTAATTTATCTAAACAGTTTTTATATATATATGTATATATATATATATATATACACAGTATTAATATTCCT  
TCCTTGAG

GACATTCCCGGATTTTTATTTTCTCAATGTGCTCGTGTAAGTGTGCGCCCGGAACTTGATTCCCCCGGAC  
TAATTAGAAGTTCCGAGAACGCGCGCAAGCCGTCCCGCGCTAGAAGGCTAAAAAGCAGCCGGAGGAAAA  
AAATAACG

TGTAGCGTCGCTAAAATGGTTTTCTCTACCTTTAGTTTTACGCCAGATTTTTACTAGACGCGTTTTAGTTTT  
ACTTTTTCTACCTGTTTCGTTTTTTTTTTTTTTTTTTTTTTCGCACCAAATTTTTCAACCGTTCATGGAAGCCGG  
GATCGACC

ATATTTGATTATCATCGCCGCTGGTCACCGCATTTTTAAAGAATAAATATTACTTTTTTTCGAAATCTGGT  
GTTTTAATATTTTTAAGAAAGTTAAAAATAAGGAATATTTGATAAACAAAAAAATTTAGCCTTTATATA  
TCCATTTT

CTTACCGCGCCATTTTCGGAACTGCATTACTTTTTTCGGGACGTATTCTCGGGAAATAAGCAGGTCCAGAT  
CCGCGTAGCATGAATGGGGCGCAAAAACAGTCGCGGGTAACGAAAGAGCGCAACCACGCGTATATTCCGGG  
CCGGTGAG

TGCACACTCAGTCTTAAATCTGCCCTATACTACCGAAGATAAATACATGAACTACACGTATCATATAACAT  
CATATCCTTTTTTTTTTTTTTTTTTTTTTTTTCTAGGCTTTTACTAATACAAGGGCCTTAGCCATTCGCTAA  
ACGTAATG

CCCATTCTTGCCAGTACGCCAATAAAGTGTGTCGCGCAGAATAGATCTTCATGTAATTCCTTTTTCCCTTT  
TATGCAATCTATAATGTTAATCAGCGTAGATCACTATATACGCTTTTTTTTTTTTTTTTTTTCAGCTCCGATTA  
GAGAGCAA

CTGATCGAACGAAGCAAATCCTACGAGTAAATACATAAGCGTATACATATATATATATATATATATATATA  
TATATATATGTATATATATATATGTGTGTGTGTGTAATTGTGTGTATTCAACTGAACTATGAAGAGTCTTT  
GACCTCTT

TGTTTTTAGAGGTTTTTTTTTAAATGAGTTTATTTAAATTTAAATTTTGAATGTTATTTTTGAATAAAAAATAT  
AAAAAAATAATATTAATAATTTTTTCATTAAGTCTCATGATATCAGTGCATTAGAAAATCTTTTGGTTCC  
ACTTTTCC

AGAGTAAGTATGGTCAGCAGAACAAAAAGAGTTCCTACATTTATACGAAGGTAAAATTGTAAAAACATG  
AATGCGGCCTATCCGGCTCGAAAATTGTTCTCATATATATATAAAAAAATCACGTGGTGCAAAAAA  
TTTTTTTG

AGGCCTTTAAAAGCAACGCGACCGTCGTGGGTTCAAACCCACCTCGAGCACTTTCTCTTTTTTTTTTACA  
CGCGTTTGCAACATGCCCGTATTACATGAGCTTATTTGACTTTAGATGGTTTTTCAGTTCTTTTTTTTTTT  
TTTTTTTT

GGAAGTATGGATGAATCTTTTTTTTTTTTTTTTTTATAGCACGCAACTGAAAAAAAAAAAAAGAAAAATTTT  
TCATCTTCGCTCGACGTTTCTTTTGTAGTACTCATCTCTTTTTATATAAAGATTAATTAGTTATTGTCGCT  
TTGCTTTT

ATAAAAAAAAAAAAAAAAAAGCTTTTAAAAAAAAAAAAACTCAAAAAAGAAAGAATATTCAAAGAAAGTT  
TCATCTTGTGAGTTGAAATGAATAGTTTATTGTGGAAATTATAACAATAAAGTTAGCTAAAAGCGAAAGT  
GTCGATGA

ACAACTGCGCATATTGCTAAGAACTGCACTGAAGGCATGAATTGTCTATTCCGTTAGAAATATAATTATTT  
ACGAAAGCATCGCGCAGACGCAATTTTTTTAACATTTTTTTTTTTTTCAAGTACTCTGGAAAAGTTTTTCATG  
AAGATCAT

GCAAGTAATAGCAGCAACAACGATGCATAATTGGCATCTAGCCCCAATGACGATACACTAATATATATATA  
TATATATATATCTATATATCTGCAAGAAATAAGCGTGTGTAGTAAGTAAAAGGAAAAATAGAAATTTTTGC  
TCAAAAAT

CTGATGAGAATTCTTCATTATTTTTTTTTTTTTCTTCTTTTATTATTTTTTATGTTTATTCCATATATACACT  
TATAATTTTTTTTTTTGCGATTAATATAAGTTTGCCTGGATACACGAACATATATATGATTAATAATGGTTG  
TCTCGAAC

TGTACGACCTGTTGGAATAACGCGAAAAGAAGGGTACGGCGTAATCACCCACACGGCTTGTATTTTTTTT  
GGAGAACTAAGTCATAGACGTAATGCTAATTTTTCCGTCTAGCCGATGTTTATGCGGCTTTTATTTTTTTT  
TTTTTTTT

GATATATAAATTTTTATAAAAACCTTTGGCCAAGAAAAAAAAAAAAAGACTATGTCTAAACGTAACGTTATC  
ATTATTATTAATCATTTTAATGTTTTATAAGTTTTGTTTTTCATTTATACCCTTTAAGGAGCATTGGC  
ATTGTGTG

CCATTTTTTTTTCGTATAAGCATATTTTACATCTTTATATATATTTATTTTTTTTTTTTTTTTTTTTTTTT  
ATAGATTACATATACAACCTTTTTTATAATGTCAAACCTATAGAGTTTTATTTTACATAACGGAAGAAGCCTA  
TTGGAGCC

ACATCTGTCTTTTTTTAATTACTATTGCTGTGTACTTATAGAGTCGGTGGCATTATTTTTATTTTTTAGTAT  
TTTTTTATACGTGCGTATTCTATTGTTCATTTTTTTTACCAATTTTTTTTTTTTTTTTTTATTTTTGTTTCTT  
GCGTGGAG

TGTATTACCATAAAAAGGCTTTAATATGAGAAAAGGTGAGCGCTATATAGATTTAGTAATTTACATGTTA  
CAGAAGCAAAAAGCAAATATATATATATTTTTTATCATATTAGTTTTTATCCTCAGTAGTACTACTGAAAT  
AATAATCT

GATATTAGACATTTTTTTTTTCTATGCCTCCCTTTTCCAAGTAATGTTTTTTTTTTTTTTTTTTTTTTTA  
GCTCCTCTCACAAAAGTACTGAGGACTGAAATGTAAAACTAATAACACAATAGAAATAATCATATGATGA  
TATAGAAA

AAACGTATGTGGCCCATGCCTTCGTTACCTTGAATGGTATGTAAAGTGATAAAAAATATACACGTATATAT  
ATATATATATATATATAAGTACGTGAGATCTATTTGTATAATATAATGCTAATAAATAGTATCAACGA  
TACTGTTG

TGGTCTCCCGGAAACATGAAGATGCAGCAAAGTAAAAATAATAGGTAAAAATAATAAAAAATACATGTATC  
TTTTTGGTTGGTTAATTTATCTAAACAGTTTTATATATATATGTATATATATATATATATATACACAGTAT  
TAATATTC

ATTTTCGCGATGGTATGCCGAAAAAGGAAATAACGCAGATTGCGCGTAGTAACGAATGGATTTGACGCGTTT  
CCTTCGATGAAAAGTGGGAAATAATAAAAAAATTCTTGTCTAGACGAAACTTGGCGCAAAACAAATGATT  
TCTTTACC

AATTACATATAATATAATGGACACATAAGCAAAAAAAAAAAAAAAAAAAAAATAAACAAATGAGCAACCCATC  
AAATACCAAGAACAAGAATTTAATATAATATATAGTTATTAATAATTTAAATGTATATATGCAGTTCTGCTC  
TTATTTTG

TGACCAAGGTGAAATTAGCAGGCAGTTTGAACAAAACCTTACAAATAAATGATTAATTTTAGACAATATTTT  
TTTTTTTTTTTTTATTATGTATATAGTTAACATGTATAAAGTAATAGCAGATTCTCTCTAAAAATATAACA  
TAACATTT

AATTAATTGATTAATTAATATTTTTGTATCTAAAGTGTTTCATACTATATTATTTACTTAGATTATACATAAT  
TAAAAAAAAAAAAAACTTTTTTCTTTGTTTTTCATTTTGTTTTTATTATTAAATATTAAAAAAAGTGTCCA  
TAACATCA

TGCCCGTTCAAAACTATTCTTTTTATGAATTGACAGAAAACCAAAAGCAAGCCGATTTTCAGGTTAACCCTT  
TATTAATAAAAAAAAAAAGCATGCATAACACTAATAATATATTATTAATAAAGCAATCTATATTA  
TTTAAATT

TAATTGTATTATATAAAAAGTAGTTAGTTTTTTTTTTTTTTTTTTTTTTTTTTTTTTTTTTTTTATGTGTAATGCA  
AATACAAAAGAAGTGCAGGCATTTTGAAAGTTCCTCGTATAGGAACTTTGATAGAGAGGCAATTCCTT  
ACTTTCGT

GTCTTAAATCTGCCCTATACTACCGAAGATAAATACATGAACTACACGTATCATATAACATCATATCCTTT  
TTTTTTTTTTTTTTTTTTTTTTTTCTAGGCTTTTACTAATACAAGGGCCTTAGCCATTCGCTAAACGTAATGAA  
CGATATTG

TGTTATACTTAGTTATGCTCTAGGATAATGAACTACTTTTTTTTTTTTTTTTTTTTTTTACTGTTATCATAAATAT  
ATATACCTTATTGTTGTTTGAACCGTCGGTTAATTCCTTATCAAGGTTCCCAAGTTCGGATCATTACCA  
TCAATTTT

TTTTCTTTTTCTTTTTCTTTTTTTTTTTTTTTTTTTTTTTTTTTTTTTTTTTTACATCTTTTTCCACGGCCGCTCAA  
AGGGGTCTCACACTGGATTAAGCTGAAAACAAGAAATGGCTCTTTCGATAAGGTTGCAACATTTTGATT  
ACTACGTT

AACAGAGTGTTACGCCAACATACTAAACCAGAGAAGTAAACGTTTTACTTATATATAATAGTATTCGTAA  
ATTTATAAAAATCAAAAACCAATATAAGCCTGGTTAAAAAAAAAAAAAAGATCAGTATCGTAAAGTCGTAA  
AGTTAGGT

TTTTTATAAAAACTCTTGGCCAAGAAAAAAAAAAAAAAGACTATGTCTAAACGTAACGTTATCATTATTATTA  
AATCATTTTAATGTTTTATAAGTTTTGTTTTTCATTTTCATACCTTTAAGGAGCATTTGGCATTGTGTGCG  
CCCTGAAG

TTACCGTACGCATCGTGTTGCAAATAGCATATACATATATATATATATATATATACATATAACGTATACG  
TTAGAAAAATTTGAATACACACATTCATTTATCCTATTATTATCATTTTCATTCTTACCCGCTCCCGCTT  
TCATCCGG

ATATAAAGTAGTTAGTTTTTTTTTTTTTTTTTTTTTTTTTTTTTTTTTTTTTATGTGTAATGCAAAATACAAAA  
GAACTGCAGGCATTTTGAAAGTTCCTCGTATAGGAACTTTGATAGAGAGGCAATTCCTTACTTTTCGTTA  
TTCCTTTC

ATATAATCTTACTGTCCTCCGTTCTGTAAAATTCACGCTCTTAGTCCCTTTTCATAATTCCTTAACTTTTT  
GCGTACAAAATGATATGTTTATTATATTTTTCTTTTTTTTTTTTTTCAAATTTTTCTTTTTCTTGAAAAAT  
TTTCAAAT

TGCAAAAGGTCACATGCTTATAATCAACTTTTTTAAAAATTTAAAATACTTTTTTATTTTTTATTTTTAAA  
CATAAATGAAATAATTTATTTATTGTTTATGATTACCGAAACATAAAACCTGCTCAAGAAAAAGAACTGT  
TTTGTCTT

AAAAATATTCTGCTACTATTCTTACTTTACTATAAGAATTTTGTTTTCCAAAAAATAAATAAAAA  
AATAATCATACTCTATTACTATGGCTAACGTAGAAAACCAAACGATTGTTTCAGGCTTTCCCGTTGTTGAC  
TTGAATTC

TTTTTTAAAGTGTTATACTTAGTTATGCTCTAGGATAATGAACTACTTTTTTTTTTTTTTTTTTACTGTTA  
TCATAAATATATATACCTTATTGTTGTTTGCAACCGTCGGTTAATTCCTTATCAAGGTTCCCAAGTTCGG  
ATCATTAC

CTAGGGGTAGAATTACTTTTTGAAAAGGAAAAATATTCAGGTTTGTGTTTTTATGTAAGTTGTATGATTT  
GATATACATATATATATATATAATATATATTGTACATGTGTTTTTCCGGGGAAGAATGGATTATCCGGA  
GGTGTGAA

CAGGTCCAGATCCGCGTAGCATGAATGGGGCGCCAAAACAGTCGCGGGTAACGAAAGAGCGCAACCACGCG  
TATATTCCGGGCCGGTGAGGGCAACGCGCATTGTCCCGGGCGATATAATCCATGTACCGGAACCCGCAC  
TTTTTCGA

ATCCTGTCAATTTTTTTTTTATTTTTTTTTTGCAAAGCTCCCTTTTTCTGAAACCAACAACAAAATATAAAA  
AAAAATGATAAGCAGGATTTTTCTTTTAATAATTCCTTAAAATTAAC TAACAAGCTGAAGCCCTTACAA  
CAAAGTAA

CACCTCGAGCACTTTCTTTTTTTTTTACACGCGTTTTGCAACATGCCCGTATTACATGAGCTTATTTGAC  
TTTAGATGGTTTTTCAGTTCTTTTTTTTTTTTTTTTTTTTTTTCAGTAGATTAATGCGAAGAGTTAAATCACC  
AATTCAAA

TTGCTGGTGTTGGCGCTACCATTGTTTTTTTTGTTTTATGAGTTACGTTTACAAAAGTTCTTAACATTTACT  
GTACGATAATATACTAAGGTGAAATACTAAAGTAAAATAAAATAAGAGAAAGAAAAAAAAAAAAAAAAAGAA  
AAAAGTAA

TTGAAAAAGACTACAAAAGAAATCAAGTCGATCGAGTAATCGAATTTACGTAGCCCAATCTACCACTTT  
TTTTTTTCATTTTTTAAAGTGTTATACTTAGTTATGCTCTAGGATAATGAACTACTTTTTTTTTTTTTTTTT  
TTACTGTT

TATTATTATTATTATTATTATTATTATTATTATTATTATTATTATTATTATTATTATTATTATTATTATT  
TAAATATTGACACTGCTTTACGCACTAGATTGTGCGGGTAACTGAATATTTTTTGAAGAAAAA  
AATTCGA

TGTCATTTCTCATAACTACTTTATCACGTTAGAAATTACTTATTATTATTAAATTAATACAAAATTTAGTA  
ACCAAATAAATAAATAAATATGTATATTTAAATTTTAAAAAAAAAATCCTATAGAGCAAAGGATTTTC  
CATTATAA

ATGCACCTAAAACCTCGCCTGCACTCCGAAACGAAATGCGATACAGTACGTGTCATGCGGTTAGTATATATA  
CATATATATATATATATATATATTTCAAATAAATTATAACGTATTAATAATATGTGAAAAAGAGGGAGAG  
TTAGATAG

GGTTTTTTTTTAAATGAGTTTATTTAAATTAATTTTTGAATGTTATTTTTGAATAAAAAATATAAAAAAATA  
ATATTAATAATTTTTTCACTGCTCATGATATCAGTGCATTAGAAAATCTTTTGGTTCCACTTTTCCTA  
TAAAAATA



GAAAAAAAAAAGCACCTATTGCATATAAAGTATTCAAAAAGGTGTTGAAAGCTCTTCCTGTATATGACCCT  
GTATTTAATGTACGCGGTTAAAAAATTTTTATATTTTTTAAATAAGTATCAACTTGGATAATATGATCTTGC  
CCGCAAGG

TATGTTCCAGGATATGAAATGAAATACCTTTTGTTCACCTTTTAAATAATTTAATGTTATATATACAAC  
TTATCGTATCATATTCGCAATTACATTATACAAGAATGAGTTTTTTTTTTTTTCGCGGACAAAAGAAGAACAT  
GTCAACGC

TCCTTATTTTTTTTGAGAAAAAATGCTTGAGAAAAAATGCTTGAGAAAAGATGTATTTTTTTTTTATTTCGTTA  
GCATTTTTCCAGATATCGTTGAACATTGCTAGAATACTATCAAACCCGACTTTCCCTTCACCGCGTTATC  
ACTAAAAC

TAAAACCTGCATTCCAATTTATCAAAAAGTTTGCCAGGACATATAGGATATAAATGCATTGCGAAGTAAAA  
CACTTCTCAAAAAATTAATAAAAAAAAAAAAAAAAAATAAACTAACGTATTCATTCTTTTACTTTAGTGGAGA  
GAATAACG

CCGTTTTTTTTGACATTAAGTTTTCTTAATGCCGCGCGTTTTGAAAGGAAACTGATCTGAAAGTGATTTAT  
GATGCCAAAAAAAAAAAAAAAAATCTTTTGAAGTACAATGTATGTATGCATGAGTTTATAAAAAATGATGTAA  
AGTGCGGA

CGACATAAAGATAGAGATCTTTTTTTTTTCTTTTATTTTTTTTTTTTTGATTTTTTTTTTTGATTTTCTTGATA  
TTAGTTTTTAGAAGTCCTTTGACGGGGCAGCCGGAGAATATATACCAACGGCATTCTATTGTCTTTTTTTT  
TTCCTTCC

TTTTTTTTTACACGCGTTTGCAACATGCCCGTATTACATGAGCTTATTTGACTTTAGATGGTTTTTTCAGTTCT  
TTTTTTTTTTTTTTTTTTTTTTTTCAGTAGATTAATGCGAAGAGTTAAATCACCAATTCAAAGATGGCAGATGG  
ACCACCTT

GTTTTTGCTTCCGTTTTTTTTGACATTAAGTTTTCTTAATGCCGCGCGTTTTGAAAGGAAACTGATCTGAA  
AGTGATTTATGATGCCAAAAAAAAAAAAAAAAATCTTTTGAAGTACAATGTATGTATGCATGAGTTTATAAAA  
AATGATGT

TATATAGGTCAATTAATATATTTATAGATCATCCTGTCAATTTTTTTTTTATTTTTTTTTTGCAAAGCTCCCT  
TTTTCTGAAACCAACAACAAAATATAAAAAAAAAAATGATAAGCAGGATTTTTTCTTTTAATAATTCCTTA  
AAATTAAC

GGTATCAAGCAGTAAACAACCAATATATGCATGGGCTGAGATAGAGGTACAAGGAATTTGTAAATCAGTA  
AAAAAAAAAATTAACAGTTTTTTTTTTTTTCATTTTTTTTTTTTTATTCTTATTTATGTATGATACTTTATTAT  
TATTTCTC

AGAATTGACGTATAACTTCTTTTGAAAGTCTTTGAAATTACATGGTAGTACATACATATATATATATATAT  
ATATATGTTATATTATTGTTAATTAATATTATTATGCGTATTTTTCTTTTTCTTTATTAGTATAGTATTA  
TGACAGTA

ATTTTTTTTTTCTTCTGAAAAAATTAATTAGATTAATTTCAATTAATATCATTTCGCTTATCTGACTTCT  
TTCATTTTTTTTTCTATATTTTCGCGTTTACTAGGAAAGAAAAGGAAAAAATTTTTCCCCCTCCATCTG  
TCCCAAAT

TACGCCAACATACTAAACCAGAGAAGTAAACGTTTTACTTATATATAATAGTATTCGTAAATTTATAAAA  
ATCAAAAAACCAATATAAGCCTGGTTAAAAAAAAAAAAAGATCAGTATCGTAAAGTCGTAAAGTTAGGTCA  
TTGTTTTT

CTTTTTTTTTATCCGTATATATTAAGGTATGCTATATGTGTATTTTTCCAATGTTTAGTTTTTATAATAATAC  
TTCTTCAGCATCAAAATATGCTTGCTTATGTAAAAATACAATCAAGTTTTGTCCCTTGCTTGCGCGAAGATG  
AAAACCTC

ATTCACGCTCTTAGTCCCTTTTCATAATTCCTTAACTTTTTGCGTACAAAATGATATGTTTATTATATTTT  
TCTTTTTTTTTTTTTCAAATTTTTCTTTTTCTTGAAAAATTTTTCAAATTGGAAAGCTCATCTCTCTTGAA  
TGTATAAT

CATGGTAGTACATACATATATATATATATATATATATATGTTATATTATTGTTAATTAATATTATTATGCGT  
ATTTTCCTTTTCTTTATTAGTATAGTATTAATGACAGTAATAATAATAATAATAGTAACAATATCTCTTTT  
TTTTTTTC

TTTGGAAGCGTGCACACTCAGTCTTAAATCTGCCCTATACTACCGAAGATAAATACATGAACTACACGTAT  
CATATAACATCATATCCTTTTTTTTTTTTTTTTTTTTTTTTTCTAGGCTTTTACTAATACAAGGGCCTTAGC  
CATTGCT

TGTACTGCTGAAAAAAAAAAAAAAAAAGAAAAAAAAAGAAAAGATATCTTGGTTTGAATAAGTAAAATTAA  
TAGAATCCAGTTTCCAGTGATCGGTACAGGCTAAATAATAAATATCTCTACTTTTTATTATTCTTTTCGTT  
TTCTTGTG

TAAATGAGGGAAAAATGCAAATAATCTTGAATGATACTCAAACTTTTGATTTATTGTAATTTCTTTCTGA  
ACCATATTTATTACATTCAAACTTTTTTTTTTTTTGCTTTTATAAAAAAAAAATACTTATAAGAAAAGAGAA  
AGAAAATG

GAGTACCGGGAGTATTATGTGTCATAATTTGTAGTATTATCTGTGTGACGGATTAAGTTTGCTATCTCAA  
TGCCGCGCGCGAATTGCTCATGATATAATAATAGCTAATAATATGATAATATGATAATAATAGATAAGA  
TTACTGAT

ACTATTAAGTTACGCTAGATGTTTCGAACCACCCAGGTCACACTGTCATTATTAGTAGTACATATATATAT  
ATATATATATAATTATCATTTAAAAGGAGATATATTACTGATAATCAAATAGTAAAACTACATCCGGAG  
TATGACAG

TTACAAATCGACGAGGCCCTATAAAAAGCATTACCGTCACGCATCGTGTTGCAAATAGCATATACATATAT  
ATATATATATATATACATATAACGTATACGTTAGAAAAATTTGAATACACACATTCATTTATCCTATTATT  
ATCATTTT

TACTATATTATTTACTTAGATTATACATAATTAAAAAAAAAAAAAACTTTTTTCTTGTTTTCATTTTGT  
TTTTATTATTAATATTAAAAAAGTGTCATAACATCAATGTTTTTTTTTACCTTTGATTAGTTTTTCATT  
GGCGAAAC

TTTTACGAACGGGTTTCCATAGACATTGAAAATGAACGAACAAAATAAAATAAATAAAAACTACTTTTTT  
TTGATGATATAAATACCGTAGATTATATAAATGTATATTAATATTATAAACCTATTTGATCAATGACAGTG  
TTCGTGAA

TGGTCAGCAGAACAAAAAGAGTTCCTACATTTATACGAAGGTAATAATTGTAAAAAACATGAATGCGGCCT  
ATCCGGCTCGAAAATTGTTCTCATATATATTAATAAAAAATCACGTGGTGCAAAAAAAATTTTTTTGTC  
ATTTCTTC

GTTCTGTAAAATTCACGCTCTTAGTCCCTTTTCATAATTCCTTAACTTTTTGCGTACAAAATGATATGTTT  
ATTATATTTTTCTTTTTTTTTTTTTCAAATTTTTCTTTTTCTTGAAAAATTTTTCAAATTGGAAAGCTCAT  
CTCTCTTG

CAATTACCACTGCAAAAATGTTCTTCAAACGCGTTTATTATATAATGAAAAAGAAATTCAAATTTTTCGCG  
TTTGAAAATTTATGCTAAACAAATAACTCGAGGAGGGACGCGTCGAGAAAATCGCGTCTTTCTACTCTCAC  
AGTGCTTG

GAACACGAATACTAGTAGTAATAGTAGTCAGATACAAAATTCATGTAACATATTTTTTCCAGTCACTAT  
CATCATCATATTTTTGTATATATACATTTATTATATAAAATATCATACCAATTTTTGCCAAAGAACACC  
GTTTCCCT

GTTCAAACCCACCTCGAGCACTTTCTCTTTTTTTTTTTCACACGCGTTTGCAACATGCCCGTATTACATGAG  
CTTATTTGACTTTAGATGGTTTTTCAGTTCTTTTTTTTTTTTTTTTTTTTTTTTTTTTTTTTTTTTTCAGTAGATTAATGCGAAGAG  
TTAAATCA

CCTGTACCTGCTTTTTGTTATCGTTGTACATCCATGCACACGCTCATATATATATATATATATATATATATATG  
TATATGTACATATACCGCTTACCACCTACCGTGAAGTATATGTAAGGGTCTTCGCACCCGGATATCCCTTG  
TGGGATCT

AATGCAAAATCTAGGGGTAGAATTACTTTTTGAAAAGGAAAAATATTAGGTTTGTGTTTTTATGTAAGT  
TGTATGATTTGATATACATATATATATATATAAATATATATTGTACATGTGTTTTTCCGGGAAGAATGG  
ATTATCCG

AAAATTATAAGTTTCTCCTTTTCGGAACAAAAATAATATTAATAATAATATATAAATATTATATCTTTTT  
TATAATATAACATAGATACGAGTTTTTATGTTCTTTGGCAATAGCTTTTCGTGACTTGTTTTAAATACAA  
GGCATATA

GAAAATGCCCGGAGATCTAATATTAACGAAAAACTGAAATAAAAGCAACGCTTATACATATACATGCAT  
GCATTAATATATGTATATATATCGGTACGTATAGATTGTAATAATTACTTACTACTAAAGGCAGTATGAA  
AGACGCC

GCTCATCCATTTAAAAAATAAATAAGAATAACAATAATTAAGCAGAAAAATGTTAACGAATATAAT  
AAATCGATTTGTCCATTTTCATAAATTTTTTTTTGTATTATTTTATTATCTGTGCCTCAAAGCATTAACT  
TTTTCTTG

ATTAGCATTATGTCATTTCTCATAACTACTTTATCACGTTAGAAATTACTTATTATTATTAATTAATACA  
AAATTTAGTAACCAAATAAATAAATAAATATGTATATTTAAATTTAAAAAATAATCCTATAGAGCAA  
AAGGATTT

TAGTGGTGTACGGAGTGCTTGAAGAAAAAATACTGATATAGAACCACAAAAATGTTTCGGCTTTTTAAATA  
CAAATATGTACAGGTGTTAATGTCTAAATAATGATAATCCAAACGCGATAATTTTTTTTTTTCGCGTTTTGTTT  
TTGTTTTCA

TGCTACTATTTCTTACTTTACTATAAGAATTTTGTTTTCCAAAAAATAAATAAATAAATAATCATA  
CTCTATTACTATGGCTAACGTAGAAAACCAAACGATTGTTTCAGGCTTTCCCGTTGTTGACTTGAATTCGT  
GCTTTTTCT

GGATGCACCTTCTGAAAGAGTCTTTGACAAAATTCAGCCATTTTTTCAACCTTTTTTTTTATCCGTATATAT  
TAAGGTATGCTATATGTGTATTTTCCAATGTTTAGTTTTTATAATAATACTTCTTCAGCATCAAATATGCT  
TGCTTATG

GCGTTCCCGGAAAAAAGGAAGGCCACGCTATTGGTAACCATGAAGTGTAAGGCGACGCAGGAGAGAT  
GAAAAGAATGAAATTAAGGAAATCCAAAAAATAAATAAATAAATAAATAAATAAATAAATAAATAAATAAATAA  
ATAACAC

TGTTTTTGCTTCTTATGGATTGGATGTTATAACAGTAGAAGTAATTTTAGGATAAATTTAAATAAAAAATA  
TATTAATAAATAAATAAATAAATAAATAAATAAATAAATAAATAAATAAATAAATAAATAAATAAATAAATAAATA  
ATACGTCT

TGTAGTGTACTTTAAACATTTTTTATCTTCATAGCAATAATAAGCCTTTTACCACCCATAAACCATAA  
AGTAGACCCAAACATTTTTAAAAAATTTTACGTTATAATTTTTCTTTGTCGTTTTTTCTGAGCGCGCAA  
AGTAGCGG

ATGTACTCAGTCTAATCTACTTTGATTTAATTTAATTCAAGTTATATAAATCTATTCTTTTTCCCTTTAATT  
TTAATATTTAATTTCAATCCTTTTTCTTATTTTTCTATTTTTGCTTTTTTTTTTTTTTTTTTCCATATTCTC  
AGGCCACG

ATATTGCTAAGAAGTGCCTGCAAGGCATGAATTGTCTATTCCGTTAGAAATATAATTATTTACGAAAGCAT  
CGCGCAGACGCAATTTTTTTAACATTTTTTTTTTTTTCAAGTACTCTGGAAAAGTTTTTCATGAAGATCATGA  
ATACGTTA

TATACACAGTATTAATATTCTTTCCCTTGAGATTACTCTCTATAAAAAAAAAAAAAAAAAAAGCTTTTAAAAA  
AAAAAAAAACTCAAAAAAGAAAGAATATTCAAAGAAAGTTTCATCTTGTTCAGTTGAAATGAATAGTTTATT  
GTGGAAAT

TACAAAGAAGTTTTCACTAAAAGTTGTTCGCGATTGTATACATATATGCGTATATATACAATTCTACATGTTT  
TATATTTATTCCATTATATTCTCGTTAAATTTTTAACTTTAAATTAAGAGGGCAAAGAGGCCAGCGGGAGT  
TAATTTTT

AATTTTACAACCGAGTAAATATCTTATAATCATTAAAATTATTAACTATTATACAATTTTTTTTTACTTTA  
CTTTAATTTTTATATACCCATATAAATAATAATATTAATTATAACCAAAGGAAGTGATTTTCATTATGCTTG  
AGTAGAGG

CGCCTATATAGATTTAGTAATTTACATGTTACAGAAGCAAAAAGCAAATATATATATATTTTTTTATCATAT  
TAGTTTTTATCCTCAGTAGTACTACTGAAATAATAATCTCAGATTTTTTTTTTTTTCACTTGCCGAGGGACCT  
TGTCTTAA

TGCTCACTTAGTGCTGCAGGTAAATTCCGTTTTTTTTTCCAAATTAATATTTATGAACGTTATGATGTCAAGT  
TTTTTCAAGAAGTAATTATCCGCGAAAAAAGAATATAAAAAATACAAATGTGCATAGATCCTCACATAGT  
ATACAAT

TGCCCTATACTACCGAAGATAAATACATGAACTACACGTATCATATAACATCATATCCTTTTTTTTTTTTTT  
TTTTTTTTTTTTCTAGGCTTTTACTAATAACAAGGGCCTTAGCCATTTCGCTAAACGTAATGAACGATATTGAA  
GCAAATGA

CACATGCTTATAATCAACTTTTTTAAAAATTTAAAATACTTTTTTATTTTTTATTTTTTAAACATAAATGAA  
ATAATTTATTTATTGTTTATGATTACCGAAACATAAAACCTGCTCAAGAAAAAGAACTGTTTTGTCTTGG  
GAAAAAA

GAAACTATGTTTAAATTGAAATAACATTCATCAGCAAAATTAATAAACTAAATAAAATAAATAAATAAATA  
AATAAATAAATAAATAAATAAATAAATAAATAAATAAATAAATAAATAAATAAATAAATAAATAAATAAATA  
TTTAGACT

ACATTTCTTTTAAATCAGCGAAAAAATGGCGAGGTGAAAAAATCGATGAGATGAAAAATTTTTTACTAG  
TAAAGGCGTATTGATGATATATTAGCAGCTAAAGTATAGCAAGGTTTGTCAATTTGAAGCAGTCCGCGTGT  
TTTACAAT

AGATATTATTGAGTACCGGGAGTATTATGTGTCATAATTTGTAGTATTATCTGTGTGACGGATTAAGTTTG  
CTATCTCAAATGCCGCGCGCGGAATTGCTCATGATATAATAATAGCTAATAATATGATAATATGATAATA  
ATAGATAA

CCCGCATTAGTAATTGCCCGCTTTTCTTTTCTTCCGCGGGTGGGCCCCATAAATAGAAAAAAGAAAGA  
AAGCGTTTAAATAAATAGAGTGAGCGGATTTCTATTATCTGAAAACCGGGTTATAATGCACGTGATATGCA  
CGTGGGAG

CAAATAAATGATTAATTTTAGACAATATTTTTTTTTTTTTTTTTTATTATGTATATAGTTAACATGTATAAA  
GTAATAGCAGATTCTCTCTAAAAATATAACATAACATTTCAATTCGACTAAATAATTTTTTATAT  
AACAGATA

CGGTCGAGAAAATCGCGTCTTTCTACTCTCACAGTGCTTGCATACGTATGGTATACAGTATCAAAGTAGC  
AGAATTTGTCTTCATTATGATATATATATATATATGTACATATATATAGGGTGCTAAAAAGTATTCTTTTT  
GCTATTAT

TGAAAAAAGTTCGCTTCTTAACCATATTAGAAATCTAGAAGAAATAAAAAAATCTGGCATTAGATATATA  
TTTTGACTGTAGGCCTTCTGTATATTATATAATACTACTAATAACATCAAATGTTTGTGACTTTTCGGGTA  
ACCGGGCT

ACATATGTAAAATTACATATAATATAATGGACACATAAGCAAAAAAAAAAAAAAAAAAAAAAATAAACAAATGA  
GCAACCCATCAAATACCAAGAACAAGAATTTAATATAATATATAGTTATTAATTTAAATGTATATATGC  
AGTTCTGC

GTAAC TATTCTGTGGTTCATGCTGAGAGGAAACACTGCTAAAGCAACCTATGACCTGTACACTAATTA  
CACTTTTATCCATTTTTTTTTTCGTATAAGCATATTTTACATCTTTATATATATTTATTTTTTTTTTTTT  
TTTGGTAG

ACACATTCTTGTACATCTGTACGGCATTCCAGCTGTAAAAACCAGCAGATATCGCATAAAAAAATGGC  
CAGCTATAGAATAAAAATTAGCCCAGCTATATTTTTATAGCGTCTTTTGATGACGCGAAAAGTAGACTTCG  
GTAACACG

ACAGTGTATTAGTGCTACATAAAACGCGTTAAACTTGCATTCCAATTTATCAAAAAGTTTGCCAGGACA  
TATAGGATATAAATGCATTGCGAAGTAAACACTTCTCAAAAAATTA  
ACGTATTC

TTTGTACACGAGAATTGACGTATAACTTCTTTTGAAGTCTTTGAAATTACATGGTAGTACATACATATAT  
ATATATATATATATATGTTATATTATTGTTAATTAATATTATTATGCGTATTTTCCTTTCTTTATTAGT  
ATAGTATT

AGTCTGAATAATAGAATGAGTTACATACGTAAACGTGTAGTATTATTATTATTATTCTATTTCCCTTTCCGT  
TTTTATTATTTATATATATATATATATATATATATATATTTGGGTGTTTATATTTAGGTAGGCATAAGGATT  
TACTGTCTG

TATACTAAGGTGAAATACTAAAGTAAAATAAAATAAGAGAAAGAAAAAAAAAAAAAAAAAGAAAAAGTAAT  
GATGATGTTCCATAATTGCAGAATTAATAACTACTTAATAACTTCTCAAATTTGGCGAAGGCGGTACGGTC  
TGTTTTAC

AATTCCTATTGTTGTTGGAGGTTATTTGGGCGCTTTGGTGGCTATACTATCGGTGCCTATATATAATATC  
GGTAATTTAAAAATTTGTATATAAAAAATATAAGTATGATAGAGGTAACATAAACTGGTCCTATGCACAA  
TTGAAAAA

GATATCGCATAAAAAAATGGCCAGCTATAGAATAAAATTAGCCCAGCTATATTTTTATAGCGTCTTTTGAT  
GACGCGAAAAGTAGACTTCGCGTAACACGAAAAATGCTGGTGCAGGTGGATTTTTTTGGCAGATACTACGG  
TCAATTCT

ATTTGGTGATAATAATATATACATACATATATATATATATAAATATATAGGTATATATATAAATAAC  
CTAAGACAAGTTAAATGAGTATAAAAAACCTTGAACGTAAATGAAAAAAAAAAAAATACTAGTAAATTGAC  
AACATAAA

TCCACAGAAAAAATTCCTAAAGTTATAGTTTACATTGTTATATATGTATCTATAAAGCGAAATTTTTTAAA  
ATTAATTGATTAATTAATTTTTGTATCTAAAGTGTTCATACTATATTATTTACTTAGATTATACATAATT  
AAAAAAA

AAAATCGCTGAATTCACAGAAGAAGGCATTGATCCGTCCTACTTATTTGAATAATTAATAAGGAAAAAAGA  
TACGTTTTTATATAGATTATATAAAGATTTTTGTATTATTCAAACGAACAAAACAAAAAGGGGAAGT  
GGAAAAA

ACTTAAGATTGGTGGCCTTCTTCGGTAACTAGGGGATAAGGGGCTTCGTCTACACGATGCTCCTGTCTGTT  
TCTTTTTTTTCAATTTCTTTTTTCGCCAGCGGGAAGTACGCGGAAAACAAGAAACAAAAAATAAAAAA  
ATAAAAAA



TAAGCAAAGTTTAAAGTTTTTTTTTCCAGTTCTTTTTCCCATCGTTTTTTTTCTAGAAAGCCGGGTTTT  
TCACCGTCAAAAAATTTCTAAAAAAGATCTGTCAATCATTAAGTTTTGCTTTTTTCGGCTTTTAAGCCATG  
CTTTCAGG

CCTTTTTTTGACAAATTTGAAAATAAATATAAAAAAGGGCCATAAAATATTGAGTTAAAATTGACGATTTTT  
TTTATAGAAATGACTTGAATTTACGATTTAAAATAAAAAATATACCTGGCATATAACTAACTATACAAATCA  
TCATCTTC

TCATATCTACCGACATAAAGATAGAGATCTTTTTTTTTTCTTTATTTTTTTTTTTTTGATTTTTTTTTTTGAT  
TTTTCTTGATATTAGTTTTTGAAGTCCTTTGACGGGGCAGCCGGAGAATATATACCAACGGCATTCTATTG  
TCTTTTTT

GTGATAATATTAGTGGTGTACGGAGTGCTTGAAGAAAAAAAAAACTGATATAGAACCACAAAAATGTTCCGGC  
TTTTAAAATACAAATATGTACAGGTGTTAATGTCTAAATAATGATAATCCAAACGCGATAATTTTTTTTTTC  
GCGTTTGT

TTTACTTTACGGTCTTTAATCGATTTTAAATGATTAGTTGGGCTTTTGGCTACATATGTAAAATTACATATA  
ATATAATGGACACATAAGCAAAAAAAAAAAAAAAAAAAAAATAAACAAATGAGCAACCCATCAAAATACCAAGA  
ACAAAGAA

TCGAGAACACAATTTTACAACCGAGTAAATATCTTATAATCATTAAAATTATTAACTATTATACAATTTTT  
TTTTACTTTTACTTTAATTTTTTATATACCCATATAAATAATAATATTAATTATAACCAAAGGAAGTGATTC  
ATTATGCT

GGACATTTTTCACTATACGTTGATGCAGTAGTGAACATATTGCTCGCATAATGTTACCCGTTTATACCTCT  
ATACGATTATTAAGGGAGGGTAATACTTTCTCAATTTTTTTTTTTTTTTCAGTTTTTAATATTATTTCTTAAG  
ATTTTTTCG

TTAAAAAAAAAAAAAAAAATAGAATAACAATAATTAAGCAGAAAAATGTTAACGAATATAATAAATCGATTT  
GTCCATTTTTCATAAATTTTTTTTTTTGTATTATTTTATTATCTGTGCCTCAAAGCATTAACTTTTCTTGCG  
TCAGAGAG

GAATTATAAAACAACCTGCGCATATTGCTAAGAACTGCACTGAAGGCATGAATTGTCTATTCCGTTAGAAAT  
ATAATTATTTACGAAAGCATCGCGCAGACGCAATTTTTTTAACATTTTTTTTTTTTTCAAGTACTCTGGAAA  
AGTTTTCA

TTAATATCAAAGTCTGAATAATAGAATGAGTTACATACGTAAACGTGTAGTATTATTATTATTATTCTATT  
TCCTTTCCGTTTTTTATTATTATATATATATATATATATATATATATATATTTGGGTGTTTATATTTAGGTAGG  
CATAAGGA

ATTTTTTTTTTCTATGCCTCCCTTTTCCAAGTAATGTTTTTTTTTTTTTTTTTTTTTTTTTTAGCTCCTCTCA  
CAAAAGTACTGAGGACTGAAATGTAAAACTAATAACACAATAGAAATAATCATATGATGATATAGAAAAG  
AAGAGAGG

CCATTTTCGGAAACTGCATTACTTTTTTCGGGACGTATTCTCGGGAAATAAGCAGGTCCAGATCCGCGTAGCA  
TGAATGGGGCGCCAAAACAGTCGCGGGTAACGAAAGAGCGCAACCACGCGTATATTCCGGGCCGGTGAGGG  
GCAACGCG

AAGAAAAAAAAATCTTCAATACAGTGTATTAGTGCTACATAAAAAACGCGTTAAAACCTTGCAATTTCAATTTA  
TCAAAAAGTTTCCAGGACATATAGGATATAAATGCATTGCGAAGTAAAACACTTCTCAAAAAATTA  
AAAAAA

GGGTTTCCATAGACATTGAAAATGAACGAACAAAATAAAATAAATAAAAAACTACTTTTTTTTTGATGATAT  
AAATACCGTAGATTATATAAATGTATATTAATATTATAAACCTATTTGATCAATGACAGTGTTTCGTGAAGC  
ATTTTATG

GTAGACATGACCACTTGGAGAAGTATTGGTTCTGGCCCAATAATGGAATTTTGAGAATGAATATTTTCGCG  
TATATATTTTAATTAAGGGTTTATATACATAAAAAGATATATCTAATGATCTGATCTGAGTCCCGACTTTTT  
ATATGTGC

TGTCTTCAACTAAAAGGCGAAGAAGGAAGCGACACATTTGTGATGCTTTGAGGTGAGTAATGTAATATATA  
TATATATATATATATATATATATTATATAGTGTAACTGCTCTTATTTATCTTGTCTATTTCGAACCCAACA  
AAAAGGCT

CTTGCCATGTAATAATAGATGTCCAAAAATTTTCATCTGCCATTTTTTTTTATTTTCCCGTTCGTTCACTTGCT  
CTAGTTTTTTTTTTTTTTTTTTTTTTCAATACTCGGATTTGAAAATGTTAATGGGAGTGGCGCTAAAAACCTTC  
ATCTGTAG

AGAATAAATATTACTTTTTTCGAAATCTGGTGTAAATATTTTAAAGAAAGTTAAAAAATAAGGAATATT  
TGATAAACAAAAAAATTAGCCTTTATATATCCATTTTTGTTTATGTATTCCTTTTTTATTTTCTTATG  
TGTTTGGG

AGGTAAATAACCTATCGTCTATGACTCAGTCTAATCTACTTTGATTTAATTTAATTTCAAGTTATATAAAT  
CTATTCTTTTCCCTTTAATTTTAAATTTTTAATTTCAATCCTTTTCTTATTTTCTATTTTGTCTTTTTTT  
TTTCTTTT

GGTCTTTAATCGATTTTAAATGATTAGTTGGGCTTTTGGCTACATATGTAATAATACATATAATATAATGGA  
CACATAAGCAAAAAAAAAAAAAAAAAAAAAAAAAAATAACAAATGAGCAACCCATCAAATACCAAGAACAAGAATT  
TAATATAA

ATTTCTTTTTCTTTTTTTCAAAGAGGTCATATTTATCACCAACTATATATTTTTTTGAAGAAAAGATATCA  
TTACAACGATAAGTAGTTACAATATTTTTTTTATTTAGTTTAAATAATGAGTAAATGACGTCGCATTTCT  
TCGCTTTT

ATATTTGCCATTTGAATTTTTTTTCGGCGCTTTTCTTTTTTTTTTTTTTTTTTTTTTTAGCTTGAATTATCGA  
TGAATGATGAAATGACTCTTAATGAACTTCGAAGTTATATATACAGCCACTTTTTTTGTTTAGAAAGAAAAG  
TATAATTA

TAATTTAACATCAAAGGAATCTATGGTGTGGCCGTTGATATTTTCGCGATGGTATGCCGAAAAAGGAAATA  
ACGCAGATTGCGCGTAGTAACGAATGGATTTGACGCGTTTCTTCGATGAAAAGTGGGAAATAATAATAAA  
AAATTCCT

TACCGAAGATAAATACATGAACTACACGTATCATATAACATCATATCCTTTTTTTTTTTTTTTTTTTTTTT  
TCTAGGCTTTTACTAATAACAAGGCCTTAGCCATTGCTAAACGTAATGAACGATATTGAAGCAAATGAAG  
TAAAACAA

AAAAAAAAAAAAAAAAAGAAAAAAAAAGAAAAAGATATCTTGGTTTGAATAAGTAAATTAATAGAATCCAG  
TTTCCAGTGATCGGTACAGGCTAAATAATAAATATCTCTACTTTTTATTTATTCTTTTTCGTTTTCTTGTGTT  
CAGGATAG

AATCTTCAATACAGTGTATTAGTGCTACATAAAAACGCGTTAAAACCTTGCAATTCCAATTTATCAAAAAGTT  
TGCCAGGACATATAGGATATAAATGCATTGCGAAGTAAAACACTTCTCAAAAAATTAAAAAAAAAAAAAAAA  
AATAAAC

GAAATCAAGTCGATCGAGTAATCGAATTTACGTAGCCCAATCTACCACTTTTTTTTTTTCATTTTTTAAAGT  
GTTATACTTAGTTATGCTCTAGGATAATGAACTACTTTTTTTTTTTTTTTTTTTACTGTTATCATAAATATA  
TATACCTT

GTGAGCAAAACGAAGAGAGAAAAAATTTTTCTTAAAAGTTTTTTTTTCAATTTGTGAGCTTATTCTTCTT  
TTCTATATATTCTTGATATCTTAGATTATACATATTATTCTTACATTTACGATTGCCCTTTTGGTGT  
TAGCATTC



ATGGAATACAGCTCATCCATTTAAAAAAAAAAAAAAAAATAGAATAACAATAATTAAGCAGAAAAAATGTTAA  
CGAATATAATAAATCGATTTGTCCATTTTCATAAATTTTTTTTTTTGTATTATTTTCATTATCTGTGCCTCAA  
AGCATTAA

TTAGTCCCTTTTCATAATTCCTTAACTTTTTGCGTACAAAATGATATGTTTATTATATTTTTCTTTTTTTT  
TTTTCAAATTTTTCTTTTTCTTGAAAAATTTTTCAAATTGGAAAGCTCATCTCTCTTGAATGTATAATAC  
TTTCTTCC

AAAAAAAAAAGCATGCATAACACTAATAATATATTATTAAAAAAAAAAGCCAATCTATATTATTTAAATTA  
TCCGAAATTACTTTTTATTACATTATGACATTCTATAGTCTATGCAAGCGGATCAAAAAACCATTCCATCTT  
GGTGCCAC

AAAAATAGATAAAAACAATGAGATAATATTTATTAACCTTCTACGTAAATAAAAAGTTACATAAGGATCAACC  
TTTTTTCTTTATTTCTTTTTTTTTTTTTTTTTTTTTTTTCAATTTCAACTAACATAACAGTAAGCA  
GTGCTTTT

GGAAC TTGATTCCCCCGGACTAATTAGAAGTTCCGAGAACGCGCGCAAGCCGTCCC GCGCGTAGAAGGCT  
AAAAAGCAGCCGGAGGAAAAAAAAATAACGCAAATGTGGGCTCCCCTTCCCCTGTGCGGCCACGTCGTGCCT  
CCCCACCA

GTGCACGCAATATGTTCCAGGATATGAAATGAAATACCTTTTGTTCACCTTTTAAATAATTTAATGTTAT  
ATATACAAC TTTATCGTATCATATTCGCAATTACATTATAACAAGAATGAGTTTTTTTTTTTTTCGCGGACAAA  
AGAAGAAC

TCAAAAGGAATCTATGGTGTGGCCGTTGATATTTGCGGATGGTATGCCGAAAAAGGAAATAACGCAGATTG  
CGCGTAGTAACGAATGGATTTGACGCGTTTCTTCGATGAAAAGTGGGAAATAATAATAAAAAATTTCTTGT  
CAGACGAA

CTCAACACTGAGGAGAACACAAAAAATAGTGGAATGTGATAGTTTGAATAAGGATATTAGTTTATACT  
CTAATATACAAATATAAAAGTTGTTTCTTTTTCTTTTTTTTTTTTTTTTTTTGGACTTGTCTTCGTTTTTATTA  
CATACATG

GAAAAAGTACAAAAATGATAAAAGGCAAAAAAGATGAGAAGTTTTTTTTTTGTGATAAAATTAATTATTTAAA  
AAATACACACGTAGTTAAAATTAACAGCGGGGAGGAAACCTTAAGAGAAAGAGAAACAAAAAAGAAA  
GGAAACAA

TGCCATATTATATTACAGAGAACAGAGTGTTACGCCAACATACTAAACCAGAGAAGTAAAACGTTTTACTTT  
ATATATAATAGTATTCGTAAATTTATAAAAAATCAAAAAACCAATATAAGCCTGGTTAAAAAAGAAAAAGA  
TCAGTATC

GGGAAATAAGCAGGTCCAGATCCGCGTAGCATGAATGGGGCGCCAAAACAGTCGCGGGTAACGAAAGAGCG  
CAACCACGCGTATATTCCGGGCCGGTGAGGGGCAACGCGCATTGTCCC GGGGCGATATAATCCATGTACCG  
GAACCCGC

GAAGGGAGGGGTTTTTGGCTTCCGTTTTTTTTGACATTAAGTTTTTCTTAATGCCGCGCGTTTGAAGGAAA  
CTGATCTGAAAGTGATTTATGATGCCAAAAAATCTTTTTGAAGTACAATGTATGTATGCATGA  
GTTTTATAA

TTACTTTTTTCGAAATCTGGTGTTTAAATATTTTTAAGAAAGTTAAAAATAAGGAATATTTGATAAACAA  
AAAAAATTAGCCTTTATATATCCATTTTTGTTTATGTATTCCTTTTTTTATTTTCTTATGTGTTTGGGAT  
TTACTGTC

TTGTTGCTATGTCCTTGTACAAACGTATGTGGCCCATGCCTTCGTTACCTTGAATGGTATGTAAAGTGAT  
AAAAATATACACGTATATATATATATATATATATAAGTACGTGAGATCTATTTGTATAATATAATGC  
TAATAAAA

CGCCAAAACAGTCGCGGGTAACGAAAGAGCGCAACCACGCGTATATTCCGGGCCGGTGAGGGGCAACGCGC  
ATTGTCCCGGGCGATATAATCCATGTACCGGAACCCGCACTTTTTCGACTTTCTTTCCCTTTTCTGTGTC  
TCCTATTG

TATACGATTATTAAGGGAGGGTAATACTTTCTCAATTTTTTTTTTTTTTTCAGTTTTTAATATTATTTCTTAA  
GATTTTTTCGGTGGCGTTTTTCGCGACAACCTACGAGAAAAAAAAAAAAAAAAAGAGGAGACTTGAAGAAAGAGTGCAA  
AGGGATAG

TCTATGGTGTGGCCGTTGATATTTTCGCGATGGTATGCCGAAAAAGGAAATAACGCAGATTGCGCGTAGTAA  
CGAATGGATTTGACGCGTTTTCTTTCGATGAAAAGTGGGAAATAATAATAAAAAATTCTTGTGACGACGAAAC  
TTGGCGCA

ATGAATGGGGCGCCAAAACAGTCGCGGGTAACGAAAGAGCGCAACCACGCGTATATTCCGGGCCGGTGAGG  
GGCAACGCGCATTGTCCCGGGCGATATAATCCATGTACCGGAACCCGCACTTTTTCGACTTTCTTTCCCT  
TTTTCTG

GGCTTTTGGAGTGAGCAAAACGAAGAGAGAAAAAATTTTTTCTTAAAAGTTTTTTTTTTCATTTTGTGAGCT  
TATTCTTCTTTTCTATATATTCTTGATATCTTAGATTATACATATTATTCTTCTTACATTTACGATTGCC  
TTTTGGTG

TATTTTTTTTCTCAATCTTCGATATTAGACATTTTTTTTTTTTCTATGCCTCCCTTTTCCAAGTAATGTTTT  
TTTTTTTTTTTTTTTTTTTTTAGCTCCTCTCACAAAAGTACTGAGGACTGAAATGTAAAACTAATAACACAA  
TAGAAATA

GTGGCAAATCAAAGCGTAAGGAGATAAGAAAAACAAAAAGGGCTACATTTTAGAATAATTTGAATCATAT  
GTAGAAAAGCTTGTAATAAGAAACCGTCATATTCTTTTTTTTTTTTTTTGACCGCGTATGAATCAGTAATTT  
ATTTCAAT

TATTACAGAGAACAGAGTGTTACGCCAACATACTAAACCAGAGAAGTAAAACGTTTTACTTATATATAATA  
GTATTCGTAAATTTATAAAAATCAAAAAACCAATATAAGCCTGGTTAAAAAAAAAAAAAAAAAGATCAGTATCGT  
AAAGTCGT

CCCAACGTTGGGCCTAGGCCCTTACCGCGCCATTTTCGAAACTGCATTACTTTTTTCGGGACGTATTCTCG  
GGAAATAAGCAGGTCCAGATCCGCGTAGCATGAATGGGGCGCCAAAACAGTCGCGGGTAACGAAAGAGCGC  
AACCACGC

ACGCTATAGAATGCACCTAAAACCTCGCCTGCACTCCGAAACGAAATGCGATACAGTACGTGTCATGCGGTT  
AGTATATATACATATATATATATATATATATATATTCAAATAAATTATAACGTATTAATAATATGTGAAAA  
AGAGGGAG

TTGGCATCTAGCCCCAATGACGATACACTAATATATATATATATATATATATATATCTATATATCTGCAAGAAAT  
AAGCGTGTGTAGTAAGTAAAGGAAAAATAGAAATTTTTGCTCAAAAATAACGGTCCCATTTTGATACAAT  
GTTTTTGG

GAAATTAGCAGGCAGTTTGAACAAAACCTTACAAATAAATGATTAATTTTAGACAATTTTTTTTTTTTTTT  
TTTATTATGTATATAGTTAACATGTATAAAGTAATAGCAGATTCTCTCTAAAAATATAACATAACATTTCA  
TTTCAATT

TGCAGTGGTCATTTGAAAATGGTCATTAATTTAAACAAGTAATATGAGAGGAATGAGAGGGAAATAAATAA  
CTGAAAGATAAAGGAGATAAGGAAAAAAAAAAAAAAAAAAAAAAAAAAGGGAACCTTTAGTTAGTAATAATA  
GAGTTTTT

TATTTCTACTCCAGCATTCTAGTTAAGAAAAAGTCTAAAAATGGTTTTTTTTTTCATCCAAAATATTAATTTT  
ACTTTTATTACATACAACTTTTTAACTAATATACACATTTTAGCAGATGCGCGCACCTGCGTTGTTACCA  
CAACTCTT

CCAGCATTCTAGTTAAGAAAAAGTCTAAAAATGGTTTTTTTTTCATCCAAAATATTAATTTTTACTTTTTATTA  
CATACAACTTTTTAACTAATATACACATTTTAGCAGATGCGCGCACCTGCGTTGTTACCACAACCTTTAT  
GAGGCCCG

GGAGAACTGTCCGCAGCAGCCCGCGGCTTCTGTCCTTATTCGCCCATTTTTTTTTTGATTTTCGACTTTTTTC  
ACTCTGGCTAGTTTTATTACGCATATTTGTATATATATATACGCATAAATTTCTGAAATGGATTACCTGGT  
TTATCAGA

AAGATAATTCTGGTCTCCCGGAAACATGAAGATGCAGCAAAGTAAAAATAATAGGTAAAAATAATAAAAA  
TACATGTATCTTTTTGGTTGGTTAATTTATCTAAACAGTTTTATATATATATGTATATATATATATATATA  
TACACAGT

ATTGAAATTTAAATTTGACATAAGCAAAGTTTAAAGTTTTTTTTTTCCAGTTCTTTTTTCCCATCGTTTTT  
TTTTCTAGAAGCCGGTTTTTACCAGTCAAAAAATTTCTAAAAAAGATCTGTCAATCATTAAGTTTTGCT  
TTTTCGGC

TTTTGGATAAACTTTTTCTACTGTTCTTTTTGAACTGGATTTGAATTTTATATCGATCATCTTGCCATGTA  
ATAATAGATGTCCAAAATTTTCATCTGCCATTTTTTTATTTTTCCCGTTCGTTCACTTGCTCTAGTTTTTTT  
TTTTTTTTT

TTGGACTGAACCCGCATTAGTAATTGCCCGCTTTTTCTTTTTCTTCCGCGGGTGGGCCCCATAAATAGAAAA  
AAAAGAAAGAAAGCGTTTAAATAAATAGAGTGAGCGGATTTCTATTATCTGAAAACCGGGTTATAATGCAC  
GTGATATG

ATCTTAAGCGGAAGGGAGGGGTTTTTGCTTCCGTTTTTTTTGACATTAAGTTTCTTAATGCCGCGCGTT  
TGAAAGGAACTGATCTGAAAGTGATTTATGATGCCAAAAAAAAAAAAAAAAATCTTTTGAAGTACAATGTAT  
GTATGCAT

TGTACGATAATATACTAAGGTGAAATACTAAAGTAAAATAAAAATAAGAGAAAGAAAAAAAAAAAAAAAAAGA  
AAAAAGTAATGATGATGTTCCATAATTGCAGAATTAATAACTACTTAATAACTTCTCAAATTGGCGAAGGC  
GCGTACGG

ATAGAATGAGTTACATACGTAAACGTGTAGTATTATTATTATTATTCTATTTCCCTTTCCGTTTTTATTATT  
TATATATATATATATATATATATATATATTTGGGTGTTTATATTTAGGTAGGGCATAAGGATTTACTGTCGGC  
ATGAACCT

AACTATATATTTTTTTGAAGAAAAGATATCATTACAACGATAAGTAGTTACAATATTTTTTTTTATTAGTT  
TAAAATAATGAGTAAATGACGTCGCATTTCTTCGCTTTTTGTTATTTTTATTCTCCTCTCATTTTTTGAGGAG  
AATGTTAC

AGGAGAAATAGTAGAAATTAATAGTACTCTAAAAAGAAAGAACGGAATAAGAGGAAAAGACCTTTTATCTA  
TTCAAATTGTTCCCTTAGGTATATATATATATATATATATATATATATATATATTTTTCCCTGTATATATCTATG  
TAAATGAC

GTTATTTGGGCGCTTTGGTGGGCTATACTATCGGTGCCTATATATAATATCGGTAATTTAAAAATTTGTAT  
ATAAAAAAATATAAGTATGATAGAGGTAACATAAACTGGTCCTATGCACAATTGAAAAATCTATGACAAAA  
ACTAAATG

TTGGAGGTCTCCATTGTGAATGTTCTCACTCGATTTTTTAAAGTGTCTATTTAGTGTATTATGCCGTGAATG  
CGCAAGATATATACGTATACTTAAGAATGTAGTTTATATTTGACAATTTTTTTTCAGCTCATCGCATTTTTT  
TTTCTAAA

TTTTTTTTTTTTTTTTTTTTTTTTTTTTTAATTGAACAATAGATGCAGAGGAATGCTCCAAAATTTATTTCCCT  
GAACAATATTACAAGAGGCAGATATATACTTTTTCTTATTTCCCTTAGTAAAGAATGATGCATGTATACTA  
TTACAAAT

CCGGTTCTCCCTTTATTATAAACACTTCAGAAAAATATTCTGCTACTATTCCTTACTTTACTATAAGAATT  
TTGTTTTCCAAAAAATAATAAAAAATAATCATACTCTATTACTATGGCTAACGTAGAAAAACCA  
AACGATTG

AGAAACCGTCATATTCTTTTTTTTTTTTTGACCGCGTATGAATCAGTAATTTATTTTCATTTTGAATTACAT  
CATTATAAAAAGTTCTTAGTAATATATGCATTGGGTATACAATCACGTGTACTATCAAATAAAGAAATGAA  
AATACGGA

GGCCTAGGCCCTTACCGCGCCATTTTCGGAACTGCATTACTTTTTTCGGGACGTATTCTCGGGAAATAAGC  
AGGTCCAGATCCGCGTAGCATGAATGGGGCGCCAAAACAGTCGCGGGTAACGAAAGAGCGCAACCACGCGT  
ATATTCCG

TGCAAAAATGTTCTTCAAACGCGTTTATTATATAATGAAAAAGAAATCAAATTTTTTCGCGTTTGAAAATT  
TATGCTAAACAAATAACTCGAGGAGGGACGCGTCGAGAAAATCGCGTCTTTCTACTCTCACAGTGCTTGCA  
TACGTATG

TAGTAACTACATATTCAACAATTGCAGTTTTCTTTTCTTTTTGTCTTTGTCTTTTCTTTTCTATTTATAT  
ATATATATATATATATAATACTACTATGTTATATTACATTATATTATTATCACAAATAATTATTACGT  
TCATCGTG

GGCCTTGAAAAATAGCCTGTAAATGAGGGAAAAATGCAATAATCTTGAATGATACTCAAACCTTTTGAT  
TTATTGTAATTTCTTTCTGAACCATATTTATTACATTCAAACCTTTTTTTTTTTGCCTTTTATAAAAAAA  
ATACTTAT

TTAAGGGAGGGTAATACTTTCTCAATTTTTTTTTTTTTTTCAGTTTTTAATATTATTTCTTAAAGATTTTTCGG  
TGGCGTTTCGCGACAACCTTACGAGAAAAAAAAAAAAAGAGGAGACTTGAAGAAAGAGTGCAAAGGGATAGCG  
GGATTCTA

AAAAAGTAGATGCCATATTATATTACAGAGAACAGAGTGTTACGCCAACATACTAAACCAGAGAAGTAAAA  
CGTTTTACTTATATAAATAGTATTCGTAAATTTATAAAAAATCAAAAAACCAATATAAGCCTGGTTAAAAA  
AAAAAAA

GACAATATTTTTTTTTTTTTTTTTTATTATGTATATAGTTAACATGTATAAAGTAATAGCAGATTCTCTCTA  
AAAATATAACATAACATTTCAATTCATTCGTAATAAATAATTTTTTATATAACAGATACATAAGATATTT  
ATATAGAG

GTAATATATTATATAAAATATTTTGATACCCTGTACCTGCTTTTTGTTATCGTTGTACATCCATGCACACG  
CTCATATATATATATATATATATATATATATATATATATATATATATATATATATATATATATATAT  
GTAAGGGT

TTATCGTTATTTCTTTATTTTTTTTTTTTTTTCGAAAAGATCGACCTAAGACGCGTTTGCAAAAAAAAACCA  
TTTACTTACTGCGGGTAAAATATTAAGAAACTTAGGCGTTAGCCAAGAACCATAAGAAAATAAAAAATA  
AAAAAGGT

ATATTCCTTTTTTTTTTTTTTGGACCGGTATGAATCAGTAATTTATTTTCATTTTGAATTACATCATTATAAAA  
AGTTCTTAGTAATATATGCATTGGGTATACAATCACGTGTACTATCAAATAAAGAAATGAAAATACGGATA  
TACCTCTG

CCTTTTTCTTTTTTTTTTTTTTTTTTTTTTTTTTTTTTTCACATCTTTTTCCACGGCCGCTCAAAGGGGTCTCA  
CACTGGATTAAGCTGAAAACAAGAAATGGCTCTTTTCGATAAGGTTGCAACATTTTGATTACTACGTTGA  
TTAGAATA

TCGCGAATGGACGAAATTGTATGCAAAGAAGAAACCCGAGTGATCATTTCTGTATAAGTTTTCTCAACTGA  
ATATATAAATATATATCATTACTATGCTGCTGCTGCTGCAAAAAAAAAAAAAATTTACGATAAATGCAAAAA  
CCATAGAT



GAAGTTAAAAGTGCACGCAATATGTTCCAGGATATGAAATGAAATACCTTTTGTTCACCTTTTAAATAAT  
TTAATGTTATATATACAACCTTTATCGTATCATATTCGCAATTACATTATACAAGAATGAGTTTTTTTTTTT  
CGCGGACA

ATTTGAAAATGGTCATTAAATTAACAAGTAATATGAGAGGAATGAGAGGGAAAATAAATAACTGAAAGATA  
AAGGAGATAAGGAAAAAAAAAAAAAAAAAAAAAAAAAAGGGAACCTTAGTTAGTAATAATAGAGTTTTTGG  
ACTGATCA

TTGCAGAAAAGAACAAACCAATATTTTAAATAATCAAAAATCAAATTAGCTATTATTTCTCATTGTTGGTGATA  
ATAATATATACATACATATATATATATATAAATATATAGGTATATATATAAATAACCTAAGACAAGT  
TAAATGAG

AATCACGTGGTGCAAAAAAAAAATTTTTTGTCTTTCTTCGAATCAACTCAATGAAATTTGAAAAATAGCA  
GAAAATAAGTTGATAAGATCGCAATGTAATATATATATATATATATATATTACAATTCGTGAACCTGGCA  
CAAGGAAA

TGGCGCTACCATTGTTTTTTTTGTTTTATGAGTTACGTTTACAAAAGTTCTTAACATTTACTGTACGATAAT  
ATACTAAGGTGAAATACTAAAGTAAAATAAATAAGAGAAAAGAAAAAAAAAAAAAAAAAGAAAAAGTAATG  
ATGATGTT

CTATGCAACTTGATTTTTGTTTTCTTGGCCTGAGCCATTACCCTTATTATTATCGTTATTTCTTTATTTT  
TTTCTTTTTTCGCAAAGATCGACCTAAGACGCGTTTGCAAAAAAAAAACCATTTACTTACTGCGGGTAAAAT  
ATTAAGA

TTTGACTAACAAGCAAATTGCAAAGCCGCGGCGTTCCCGGAAAAAAAAAGGAAGGCCACGCTATTGGTAA  
CCATGAAGTGTAAGGCGACGCAGGAGAGATGAAAAGAATGAAATTTAAAAGAAATCCAAAAAAAAAAAAAAAA  
AAAAAAA

CATAACTACTTTATCACGTTAGAAATTTACTTATTATTATTAAATTAATACAAAATTTAGTAACCAAATAAA  
TATAAATAAATATGTATATTTAAATTTTAAAAAAAAAATCCTATAGAGCAAAAGGATTTTCCATTATAATA  
TTAGCTGT

TAATTAATATATTATTATGCGTATTTTCTTTTTCTTTATTAGTATAGTATTAATGACAGTAATAATAAAT  
AATAGTAACAATATCTCTTTTTTTTTTTTTCAGTGAGCTTTTATTTTTTTTTTTCATTGCTCTTCTTTTGGCCTC  
TTTTGTTT

TTGGATGCCGTTGAAAAAGACTACAAAAGAAATCAAGTCGATCGAGTAATCGAATTTACGTAGCCCAAT  
CTACCACTTTTTTTTTTCATTTTTTAAAGTGTTATACTTAGTTATGCTCTAGGATAATGAACTACTTTTTT  
TTTTTTTT

GGAAATATTGATTCTTATAGTGTTATAAGTGATAATATACGTTTATGTAAATAATATCTTTTTTACAACGT  
TCAAAGTGCCCTTTTTTCTTTTTTCGATATTCTGTATATTTATTACGATTTTTTTTTTTTTTTCAGATATTT  
ATTTTTGC

TATTATTATTAATTAATACAAAATTTAGTAACCAAATAAATAAATAAATATGTATATTTAAATTTTAA  
AAAAAATCCTATAGAGCAAAAGGATTTTCCATTATAATATTAGCTGTACACCTCTTCCGCATTTTTTGA  
GGGTGGTT

ATGAAAATTTGTTTTTGTCTTCTTATGGATTGGATGTTATAACAGTAGAAGTAATTTTAGGATAATTTTAA  
ATAAATAAATATTAATAATAATAACTAATAATAAATGAGAATAAATGTTGATAAATGAGGGATA  
AGGTCTAT

TCCAGACATGATCTTAAGCGGAAGGGAGGGTTTTTGTCTCCGTTTTTTTTGACATTAAGTTTTCTTAAT  
GCCGCGGTTTTGAAAGGAACTGATCTGAAAGTGATTTATGATGCCAAAAAAAAAAAAAAAAATCTTTTGAAG  
TACAATGT

GGTCAAGAAAATGATATACAAAATGGGTTCAAAAAAATTTTTATCGAATATTTTCTGTAAATAATATTGT  
TTCTTTTAGAAAAATTTGGTTTTCTATAATATATTTATTCTCCATGTTTTAATTTTCTCAGCTATTAATG  
TTCAACTT

GATTTAGTAATTTACATGTTACAGAAGCAAAAAGCAAATATATATATATTTTTTATCATATTAGTTTTTAT  
CCTCAGTAGTACTACTGAAATAATAATCTCAGATTTTTTTTTTTTTTCACTTGCCGAGGGACCTTGTCCTAAGT  
GGCAAAGA

CGATTTAAATAGCGATGATAAAGTGCAAGTTCATAAGCAAACAGCGACCGTAAAATGGGATAAAAAAAGAA  
AAAAATATGTTAATACTCAAGGTATTGATAACAAGAAATATATTATTGGTGAAAGTGGCCAAAAAATCGCG  
GCAAGCTT

TCACGATCCAAGCACTATTTGCCATTTTTGTGCCCTTTCAAATTATTCTTTTTTATCGCATTGTCATTCTG  
GTACTATTAAGTAAAATTAAGATTGAGGAAAATTTTTGGTAAAAACGACAACACTGCAGGACTCGAACC  
TGCGCGGG

AATACTTATTCATCCTTATAATTATATTCTAGCTTCGTTGTCATGGGAACATAGCCCATACACCGCAGTTA  
TTTATGATCATTTCGAACGGGAAGTATGGATGAATCTTTTTTTTTTTTTTTTTATAGCACGCAACTGAAAA  
AAAAAAA

CTTCATTTTTACAAAATCTGGTGTAATCCTCGATTCCATTGTGATTTAAAAATAATTAATTACTGTATAAG  
ATTCTATATAGACAATTAATTGAAAATAGTATTACTTCTTTAACTCGCTTAGGATTTTTTTTTATTTTTCT  
CTCTTTTC

ATGGCTTAATATGAAAACCTTTGTTTTTGCTTCTTATGGATTGGATGTTATAACAGTAGAAGTAATTTTAGG  
ATAATTTTAAATAAAAAATAATATTAATAATAATAATAACTAATAATAAATGAGAATAAAATGTTGATAA  
ATGAGGGA

TATCAAAAAGGTCTTAAATGTTCTTCGGACTTTCTTGAAATCTTCGAAAACCTGATGAGAATTTCTTCATTAT  
TTTTTTTTTTCTTCTTTTATTATTTTTTATGTTTATTCCATATATACACTTATAATTTTTTTTTTTGCGAT  
TAATATAA

TCAATTTGGCGCCCGTTGAGATTATCTAAAAATGCTTTTTATTTATTTAAGCGCTTTTTGTTTTGACGAAT  
GTATTTATGTTTTTGTATATATATGAGCGTTTTTTTTTTCCAGATTTAACTAGTTTTCTTTTTCACCTGTA  
TGCACACC

GTCCTTGACAAAACGTATGTGGCCCATGCCTTCGTTACCTTGGAAATGGTATGTAAAGTATAAAAAATATAC  
ACGTATATATATATATATATATATAAGTACGTGAGATCTATTTGTATAATATAATGCTAATAAAAAATA  
GTATCAAC

ATCATCGCCCGCTGGTCACCGCATTTTTAAAGAATAAATATTACTTTTTTCGAAATCTGGTGTTTAAATAT  
TTTTAAGAAAGTTAAAAAATAAGGAATATTTGATAAACAAAAAATTTAGCCTTTATATATCCATTTTTG  
TTTATGTA

TGTCATTTTCGTACTAGATTAAGGGAAAATTGTATCGTAAATAAGTAATAAAGTTAATGAAAATTCGGAAA  
CAAAAATGGATAGATATTAACAGTGAACAAATGAAAAATTTTCAGAAAAAAGAATTAATAAAAAAAGGG  
AAAAATA

AATTACAATAACTATATATTATTTGTCTCTTTTTTTTTATTAGTATTAATAATTACCGTTACTGGTTAAAA  
TGGAATACAGCTCATCCATTTAAAAAATAAATAAGTAATAAATAAATAAATAAATAAATAAATAAATAAATA  
GAATATAA

AAATTTGACATAAGCAAAGTTTAAAGTTTTTTTTTTCCAGTTCTTTTTTCCATCGTTTTTTTTCTAGAA  
GCCGGTTTTTACCAGTCAAAAATTTCTAAAAAAGATCTGTCAATCATTAAAGTTTTGCTTTTTTCGGCTT  
TTAAGCCA

TCTATTGGATAGTCAATGACACATTCGTGACCGAACCAATGAGATATTATTGAGTACCGGGAGTATTATGTG  
TCATAATTTGTAGTATTATCTGTGTGACGGATTAAGTTTGTCTATCTCAAATGCCGCGCGCGGAATTGCTC  
ATGATATA

TTTAATTGAAATAACATTCATCAGCAAAATTAATAAACTAAATAAAATAAAATAAAATAAAATAAA  
TAAATAAAATAAAATAAAATAAAATAATATACGATCATAAAATAAAATAAACTCAAGCTTTTTAGACTTG  
ACTAGCTA

AGGCTATAAATCCTTATTTTTTTGAGAAAAAATGCTTGAGAAAAAATGCTTGAGAAAAGATGTATTTTTTT  
TTATTCGTTAGCATTTTTCCAGATATCGTTGAACATTGCTAGAATACTATCAAACCCGACTTTCCCTTCA  
CCGCGTTA

CCTTACTTTACTATAAGAATTTTTGTTTTCCAAAAAAAAAATAAAAAAAAAATAATCATACTCTATTACT  
ATGGCTAACGTAGAAAAACCAACGATTGTTCCAGGCTTTCCCGTTGTTGACTTGAATTCGTGCTTTTCTAA  
CGGCTTCA

TTTAAACATTTTTTTATCTTCATAGCAATAATATAAGCCTTTTTACCACCCATAAACCATAAAGTAGACCCA  
AACATTTTTAAAAAATTTTACGTTATAATTTTTCTTTGTCTGTTTTTTCTGAGCGCGCAAAGTAGCGGTG  
AAATTTTG

GACACATTTGTGATGCTTTGAGGTCAGTAATGTAATATATATATATATATATATATATATATATATTATATAG  
TGTAAGTCTCTTATTTATCTTGTCTATTTCGAACCCAACAAAAAGGCTGCAGTGGGAATCTGTTTATGTG  
GCTGTATC

ACGTATTCTCGGGAAATAAGCAGGTCCAGATCCGCGTAGCATGAATGGGGCGCCAAAACAGTCGCGGGTAA  
CGAAAGAGCGCAACCACGCGTATATTCCGGGCCGGTGAGGGGCAACGCGCATTGTCCCGGGCGATATAAT  
CCATGTAC

AACCAGCCC GCGAGCAATAAATCCGAAGAGAAGTGCATAATATTTTAGTCTATTTAATACATTTGACGTTA  
TTTGATCTTCACGTTGTTTTATATATATATATATCAAGTATGCTATAACGCTAAAAAAAATGCTCATAATA  
CTATGCAA

AAAAATGTGACAAGAAAAAAGTGGTGACAAAAAAGACAAAATAATTATTTCAGAGATGATAAACTTAAAGCA  
AAACTTGGTAACAAACTTTTATTAAAAACAAAATATGTATTCTTTTTTTCATTTTCATTTTTTTTTTACTGTT  
TTTTTGTT

AATAATATATACATACATATATATATATATATAAATATATAGGTATATATATAAATAACCTAAGACAAG  
TTAAATGAGTATAAAAAACCTTGAACGTAAATGAAAAAAAAAAAAATACTAGTAAATTGACAACATAAAAG  
ACAAAAAT

TGTCTTGAATACTGAAGCCGTTATTATAGTTCTATCTTCATGTTTTTTAGAGGTTTTTTTTTAAATGAGTTTA  
TTAAAATTAATTTTTGAATGTTATTTTTTGAATAAAAAATAAAAAAAAAATAATTAATAATTTTTTCATTA  
CTGCTCAT

ACATACATATATATATATATATATAAATATATAGGTATATATATAAATAACCTAAGACAAGTTAAATGAGT  
ATAAAAAACCTTGAACGTAAATGAAAAAAAAAAAAATACTAGTAAATTGACAACATAAAAGACAAAAATA  
ATGAAAGA

AGGAGAACACAAAAAATAGTGGAATGTGATAGTTTGAATAAGGATATTAGTTTATACTCTAATATACA  
AATATAAAAGTTGTTTCTTTTTTCTTTTTTTTTTTTTGGACTTGTCTTCGTTTTTATTACATACATGCA  
TGCGCTTA

CTTTTTTTCAAAGAGGTCATATTTATCACCAACTATATATTTTTTTGAAGAAAAGATATCATTACAACGAT  
AAGTAGTTACAATATTTTTTTTTATTTAGTTTAAATAATGAGTAAATGACGTCGCATTTCTTCGCTTTTTGT  
TATTTTTA



AACTCTTGGCCAAGAAAAAAAAAAAAAGACTATGTCTAAACGTAACGTTATCATTATTATTAATCATTTTA  
ATGTTTTATAAGTTTTGTTTTTCATTTTCATACCCTTTAAGGAGCATTGGCATTGTGTGCGCCCTGAAGGC  
TAAATAAG

GACGTGGAACATAAATTAATATAACGAACTCTAAGGAAAAATACGTAGCATAATAACGCATATAACTAACA  
ATTTGGATAACTATCCATAAAAAAAAAAAAAATAGTCACATAATACGAACATTAATATCCTTTTTTTGTTACA  
TTTTCTTC

TAATGAAAATGGGAAAAAGAGTCAGAGCTATGACCAAGGTGAAATTAGCAGGCAGTTTGAACAAAACCTTAC  
AAATAAATGATTAATTTTAGACAATATTTTTTTTTTTTTTTTTTTTATTATGTATATAGTTAACATGTATAAAG  
TAATAGCA

TCATATAACATCATATCCTTTTTTTTTTTTTTTTTTTTTTTTTCTAGGCTTTTACTAATACAAGGGCCTTAG  
CCATTCGCTAAACGTAATGAACGATATTGAAGCAAATGAAGTAAAACAATGTGGAAAGCAAATAAATAATG  
GTTATAGT

AAAAAATGGCCAGCTATAGAATAAAATTAGCCCAGCTATATTTTTATAGCGTCTTTTGATGACGCGAAAA  
GTAGACTTCGCGTAACACGAAAAATGCTGGTGCAGGTGGATTTTTTTGGCAGATACTACGGTCAATTCTCC  
GCTCGAAG

GGTAAAATTGTAAAAACATGAATGCGGCCTATCCGGCTCGAAAATTGTTCTCATATATATTAAAAAAAA  
ATCACGTGGTGCAAAAAAAATTTTTTTGTCATTTCTTGAATCAACTCAATGAAATTTGAAAAATAGCAG  
AAAATAAG

TACAGTTACATATAAAAAAAGGTGTTTTGAGTTAGTTAGTATTATATATTAATTTTCTTGAGGGGTGGT  
ATTATTAAGAATTAATTTCAATATTACTATTAATTACACTAAGGTGCCGGGTATTATTGACGTTTTT  
TTTTCTT

TGTAGAAAAGCTTGTAAATAAGAAACCGTCATATTCCTTTTTTTTTTTTTGACCGCGTATGAATCAGTAATT  
TATTTTCATTTTGAATTACATCATTATAAAAAGTTCTTAGTAATATATGCATTGGGTATACAATCACGTGTA  
CTATCAA

TGAAAAGGAAAAATATTCAGGTTTGTTGTTTTATGTAAGTTGTATGATTTGATATACATATATATATATA  
TATAATATATATTGTACATGTGTTTTCCGGGAAGAATGGATTATCCGGAGGTGTGAATAAAATGATGAC  
GATTATAG

CCATTGTGAATGTTCTCACTCGATTTTTTAAGTGTCTATTTAGTGTATTATGCCGTGAATGCGCAAGATAT  
ATACGTATACTTAAGAATGTAGTTTATATTTGACAATTTTTTTTCAGCTCATCGCATTTTTTTTTCTAAATT  
CTTTACCT

AATCGCGTCTTTCTACTCTCACAGTGCTTGCATACGTATGGTATACAGTATCAAAAAGTAGCAGAATTTGTC  
TTCATTATGATATATATATATATATGTACATATATATAGGGTGCTAAAAAGTATTCTTTTTGCTATTATTA  
TTGCTTAA

TGAAATACTAAAGTAAAATAAAATAAGAGAAAGAAAAAAAAAAAAAAAAAGAAAAAGTAATGATGATGTTTC  
CATAATTGCAGAATTAATAACTACTTAATAACTTCTCAAATTGGCGAAGGCGGTACGGTCTGGTTTTACCG  
TGCCTTAG

ACCGTCGTGGGTTCAAACCCACCTCGAGCACTTTCTCTTTTTTTTTTACACGCGTTTGCAACATGCCCGT  
ATTACATGAGCTTATTTGACTTTAGATGGTTTTTCAGTTCTTTTTTTTTTTTTTTTTTTTTTTTTCAGTAGATTA  
ATGCGAAG

AGTTATGCTCTAGGATAATGAACTACTTTTTTTTTTTTTTTTTTTACTGTTATCATAAATATATATACCTTA  
TTGTTGTTTGAACCGTCGGTTAATTCCTTATCAAGGTTCCCAAGTTCCGGATCATTACCATCAATTTCCA  
ACATTTTC

TTTGAAAGTCTTTGAAATTACATGGTAGTACATACATATATATATATATATATATATATATGTTATATTATTGTT  
AATTAATATTATTATGCGTATTTTCCTTTTCTTTATTAGTATAGTATTAATGACAGTAATAATAATAATA  
ATAGTAAC

ATCCATGATCATGATTTACGACGCGAGATGTTTCGCGCCTCACTTTGAAGAATGCCAAATATAAAAAGTATA  
AATATGGGAACATTCTTATTTGTGAAGCTGCTGTAAAACCTTATATGTAGCTTCTACAATCGCGATGTGC  
TCAGCATC

TTTTTTTTTTTTTTTTATTATGTATATAGTTAACATGTATAAAGTAATAGCAGATTCTCTCTAAAAATATAAC  
ATAACATTTTCATTTCAATTCGTAATAAATAAATTTTTATATAACAGATACATAAGATATTTATATAGAGGA  
AAACGAAA

GATGTTAATAACGCGCCGGCAAGAGCGAAAGTGAGTAAGTGATTTTTTCGTTTAAATGAATTTATTATCGCAT  
GACTTGCAGTATAGAAAATAGTTATAAGAGTGCTGAAAAAAAAAAGAAGTACAGAAGTTTTTCGTTTCTTTG  
AAAGTCGC

AATAATAGTATCAAAAATAATGATAGTCATAATAAAAATAATAATAATAATAATAACAATAATAATAA  
TAATGATAATAATAATAGTATCGAAAATAATGATAGTAATAGTAATAATAAACATGATCATGGTAGTCGCA  
GTAATACT

ACTGGCAAAGTTACAAATCGACGAGGCCCTATAAAAAGCATTACCGTCACGCATCGTGTGCAAATAGCAT  
ATACATATATATATATATATATACATATAACGTATACGTTAGAAAAATTTGAATACACACATTCATTTA  
TCCTATTA

AAAATAAAAATAAAAAGGTAATGAGGAATTAGATGCAAAGAGATATAGATATAAACACACACACACAAAT  
ATATATTTATATACATATGTATGGTGATATATATTTCAAAAAAAAAAAGTACAGTAACTTAGAACTATTAG  
TGGGACGG

ACCAGAACTCTCGATTGAGGCGAAGAAGGCGGAGAAAAAGCCGGTAAAAAAAAAAGCGGAATCAATCAG  
CACAATCAGAGGCGTCAAGAAGCGGCGGGGATAATGCTTTTTTCCCGTGGCGTTTACATTTTTTGTTCGG  
CGGAAAGC

TAATGAACAATTTACTTTACGGTCTTTAATCGATTTTAAATGATTAGTTGGGCTTTTGGCTACATATGTAAA  
ATTACATATAATATAATGGACACATAAGCAAAAAAAAAAAAAAAAAAATAACAAATGAGCAACCCATCA  
AATACCAA

TAATTAACTAAAGAAAAAAAAAATAAAAAAAAAAATAAAAAAAAAAGGTAACTAAAAAGGACAAAAACATA  
ACAGCTGTTTATAAAGTACTTTTATACGTAAGAACTACTGGCACTATTCATTCCAATAAAAGGACAGGTAT  
AAAGTGTC

TTACATGTATCCATATACTGAAAAATAGATAAAAACAATGAGATAATATTTATTAACCTTCTACGTAAATAAA  
AAGTTACATAAGGATCAACCTTTTTTTCTTTATTTTCTTTTTTTTTTTTTTTTTTTTCAATTTCAATAAAA  
CTAAGACA

CGATTTTTTAAAGTGTCTATTTAGTGTATTATGCCGTGAATGCGCAAGATATATACGTATACTTAAGAATGT  
AGTTTATATTTGACAATTTTTTTCAGCTCATCGCATTTTTTTTTTCTAAATTCCTTACCTCTCGTGCTCCGT  
GACTAGGA

TGGAAAAAGAAAAGGTAAAATTTTTTTGAAATTTGGTTAAACAAGGATAGAAAAGTAAAAAATGGTAAATTTT  
TTTTTTTGGAGTTTCTAGTTGAGGTTTTTATAATTATATTATTATTAACAGAGTTTGATTTCTTAGTCAA  
TATTCTGG

TATCGTACCAAACGAGATGTTTGCAGAAAGAACAACCAATATTTTAAATAATCAAAAATCAAATTAGCTA  
TTATTTCTCATTTGGTGATAATAATATATACATACATATATATATATATATAAATATATAGGTATATAT  
ATAAATAA

ATGTAACGTCAACCAGCCCGGAGCAATAAATCCGAAGAGAAGTGCATAATATTTTAGTCTATTTAATACA  
TTTGACGTTATTTGATCTTCACGTTGTTTATATATATATATATCAAGTATGCTATAACGCTAAAAAAAAT  
GCTCATAA

TTTCACTGGATACAAAGAAGTTTCACTAAAAGTTGTGCGGATTGTATACATATATGCGTATATATACAATT  
CTACATGTTTTATATTTATTCCATTATATTCTCGTTAAATTTTAACTTTAAATTAAGAGGGCAAAGAGGCC  
CAGCGGGA

CAAACGCCAATTTTACGAACGGGTTTCCATAGACATTGAAAATGAACGAACAAAATAAAATAAATAAAAA  
CTACTTTTTTTTTGATGATATAAATACCGTAGATTATATAAATGTATATTAATATTATAAACCTATTTGATC  
AATGACAG

TTTTTAAGAAAGTTAAAAAATAAGGAATATTTGATAAACAAAAAAAATTAGCCTTTATATATCCATTTTT  
GTTTATGTATTCTTTTTTTTTATTTTCTTATGTGTTTGGGATTTACTGTGCGAGTCTTTTCAAATTTTCCGG  
GCTAAACC

GTCCAAAATTTTCATCTGCCATTTTTTTTTATTTTCCCGTTCGTTCACTTGCTCTAGTTTTTTTTTTTTTTTT  
TTTCAATACTCGGATTTGAAAATGTTAATGGGAGTGGCGCTAAAAACCTTCATCTGTAGTTGAATGCTATG  
ACATGAGC

TGCATAATCATGTATTACCATAAAAAGGCTTTAATATGAGAAAAAGGTGAGCGCTATATAGATTTAGTAAT  
TTACATGTTACAGAAGCAAAAAGCAAATATATATATATTTTTTTATCATATTAGTTTTTTATCCTCAGTAGTA  
CTACTGAA

TTTTTTTTTTGCAAAGCTCCCTTTTTCTGAAACCAACAACAAAATATAAAAAAAAATGATAAGCAGGATT  
TTTTCTTTTAATAATTCCTTAAAATTAAC TAACAAGCTGAAGCCCTTACAACAAAGTAAGTCAAACCCAAT  
TCACAAAA

CCCGGAAAATTGTAGTGGTGCAAGAAGGGAAAAGAATGATGGCGAAAAATGCACGCGCGTAAATAATGATT  
TGTCGAGTCCTATTGACCACAAAACCCGCGGAAACCTAGTTAGCCCAAAGGAAATGGATAGCATATGAAA  
AACGAAAC

TTTGGCCCGAAAGATAATTCTGGTCTCCCGGAAACATGAAGATGCAGCAAAGTAAAAATAATAGGTAAAA  
ATAATAAAAATACATGTATCTTTTTGGTTGGTTAATTTATCTAAACAGTTTTTATATATATATGTATATATA  
TATATATA

ACTACAAAAGAAATCAAGTCGATCGAGTAATCGAATTTACGTAGCCCAATCTACCACTTTTTTTTTTTCAT  
TTTTTAAAGTGTATATACTTAGTTATGCTCTAGGATAATGAACTACTTTTTTTTTTTTTTTTTTACTGTTAT  
CATAAATA

GTGTAGATGAACTAGAAAAGGTTCAAGAGATGATAAACGTGAAGGGAGTGTATATCTACCGACATAAAGA  
TAGAGATCTTTTTTTTTTCTTTATTTTTTTTTTTTTGATTTTTTTTTTTGATTTTCTTGATATTAGTTTTTATG  
AAGTCCTT

AGTCTTTTTTTTTTTCAAATATTCATCATCAAAGGTTACGAAATCTTTTGAGCTATCTTAAACATTCGTTCT  
TTTTATCAAATTTCAATTAATACTTATTTTTTTCAAAAAAATTGCCTCTCCCGGTTTTTAAATCATTATTT  
TTTTCGAT

TTTTTTCCAAATTAATATTTATGAACGTTATGATGTCAAGTTTTTTTCAAGAAGTAATTATCCGCGAAAAAA  
AGAATATAAAAAATACAAATGTGCATAGATCCTCACATAGTATACAAC TAAAAAGCAAACAAAAGAACATC  
CTCAAATG

TTCCATTGCTTTTTCCATTTTTGCCC GTTCAAAC TATTCTTTTTATGAATTGACAGAAAACCAAAGCAAG  
CCGATTTTCAGGTTAACCTTTATTAATAAAAAAAGCATGCATAACACTAATAATATATTATTA  
AAAAAAGC

TTTCCTTGAGATTACTCTCTATAAAAAAAAAAAAAAAAAAAGCTTTTAAAAAAAAAAAAAACTCAAAAAAAGA  
AAGAATATTTCAAAGAAAGTTTCATCTTGTGTCAGTTGAAATGAATAGTTTATTGTGGAAATTATAACAATAAA  
AGTTAGCT

ATCGTTTTGTGCGAATACATTTTCATTTTGTTCCTGCGTAAGAAGTATGCATAGTAAAATTAGCGTAGATA  
TAGTTTTTTTGAGGTATATACTTATTTCATAGCTTATAAATATTTACAGTGTGTAAGTCTAGTAAAAACAAA  
AGAGGTCA

ACGCTTGGAAGATTTGAAAGCCCATTCTTGCCAGTACGCCAATAAAGTGTGTCGCGCAGAATAGATCTTCA  
TGTAATTCCTTTTTCCCTTTTATGCAATCTATAATGTTAATCAGCGTAGATCACTATATACGCTTTTTTTTT  
TTTTTTTTT

CAAATCTCCTTTGGACTGAACCCGCATTAGTAATTGCCCGCTTTTCTTTTCTTCCGCGGGTGGGCCCCATA  
AATAGAAAAAAAAAAGAAAGAAAGCGTTTAAATAAATAGAGTGAGCGGATTTCTATTATCTGAAAACCGGGT  
TATAATGC

AAAATATTTATGCAGTGGTCATTTGAAAATGGTCATTAATTAACAAGTAATATGAGAGGAATGAGAGGG  
AAATAAATAACTGAAAGATAAAGGAGATAAGGAAAAAAAAAAAAAAAAAAAAAAAAAAGGGAACTTTAGTT  
AGTAATAA

GAGAAAAAAAAAAAAATTTCAAGGGCCCAGCAATCTCAAATGGAGTCAATTGTGTCAAGTCTTTTTTTTTTTT  
TTTCATCGTTATCTCACTTTTTTATTGCTTATCTTAAGATAATTTAGCTGATATACTATATAGAATAGCCGA  
AGTGTCAG

TATCGATCATCTTGCCATGTAATAATAGATGTCCAAAAATTTTCATCTGCCATTTTTTTTATTTTCCCGTTCG  
TTCACTTGCTCTAGTTTTTTTTTTTTTTTTTTTCAATACTCGGATTTGAAAATGTTAATGGGAGTGGCGCT  
AAAAACCT

TTTTGTATCTTGAGATGGCGTATTTCTACTCCAGCATTCTAGTTAAGAAAAAGTCTAAAAATGGTTTTTTTT  
CATCCAAAATATTAATTTTTACTTTTTATTACATACAACTTTTTAAACTAATATACACATTTTAGCAGATGC  
GCGCACCT

TAATACCGTAATGATAGCAGTTTATTGTAGAAAAACCATGTTATTACCCTTCCCTTTTTTATTTCTTTTTCGC  
GTTGCAAATCACATATAACGAGGTGGCTTGTATTTGTCAAACCAAAAAAAAAAATGAAAATCGAAAATGG  
AAAAACAG

AACTAGTACCTGTCATTCACGACATGTGAACAAATAAAAAACATTTATTTAAAAATTTTATGTATTCAAATA  
TTTTCGGGAAAGAGATAAAAAGTAACGACACTTAAAAATTTAAAAAATCACAATACTTTATTTACTCAGTCT  
TTTGATCA

AAGAAAAAAAAAAAAATAAAAAAAAAATAAAAAAAGGTAACAAAAAGGACAAAAACATAACAGCTGTTT  
ATAAAGTACTTTTATACGTAAGAACTACTGGCACTATTCATTCCAATAAAAGGACAGGTATAAAGTGTCTG  
CTTATCTT

GATATGAAATGAAATACCTTTTGTTCACCTTTTAAATAATTTAATGTTATATATACAACCTTTATCGTATC  
ATATTCGCAATTACATTATACAAGAATGAGTTTTTTTTTTTTTCGCGGACAAAAGAAGAACATGTCAACGCCA  
ACCCCTA

AACTAAAATGTCCAGACATGATCTTAAGCGGAAGGGAGGGGTTTTTGTCTCCGTTTTTTTTGACATTAAG  
TTTTCTTAATGCCGCGCTTTGAAAGGAACTGATCTGAAAGTGATTTATGATGCCAAAAAAAAAAAAAAAA  
TCTTTTGA

CGAAATGCGATACAGTACGTGTCATGCGGTTAGTATATATACATATATATATATATATATATATATTCAAATA  
AATTATAACGTATTAATAATATGTGAAAAAAGAGGGAGAGTTAGATAGGATCAGTTGGTCAACTCATGGT  
AGTATTCG

AAGATGGCCAGGCTAGTTAAATCTATTATACAATAATTATTGGTTATATATTTAAAAAACAGAAACATTTT  
TTGCTTTAAAAGCACGCCATAGTATTGCTTTTAAATATTGTGATCTGCGTCCTTTTTTTTTCTCAGGAAAAA  
AAATTTTA

CATTTTTGATAACTAGTACCTGTCATTCACGACATGTGAACAAATAAAAAACATTTATTTAAAAATTTTATG  
TATTCAAATATTTTCGGGAAAGAGATAAAAAGTAACGACACTTAAAAATTTAAAAAATCACAATACTTTATT  
TACTCAGT

ATGATAGCAGTTTATTGTAGAAAAACCATGTTATTACCCTTCCCTTTTTTATTTCTTTTCGCGTTGCAAATC  
ACATATAACGAGGTGGCTTGTATTTGTCAAACCAAAAAAAAAAATGAAAATCGAAAAATGGAAAAACAGAG  
AGAGAAAC

TGATAAGAGATTCTAAGAAAGTGGCAAATCAAAGCGTAAGGAGATAAGAAAAACAAAAAGGGCTACATTT  
TAGAATAATTTGAATCATATGTAGAAAAGCTTGTAAATAAGAAACCGTCATATTCTTTTTTTTTTTTTGAC  
CGCGTATG

AGCGATGATAAAGTGCAAGTTCATAAGCAAACAGCGACCGTAAAATGGGATAAAAAAAGAAAAAATATGT  
TAATACTCAAGGTATTGATAACAAGAAATATATTATTGGTGAAAGTGGCCAAAAAATCGCGGCAAGCTTCA  
GGTCTGGT

CTTAAGCATGTATCAAATAGTAAAAAAACTTTGGAAGCGTGCACACTCAGTCTTAAATCTGCCCTATACT  
ACGAAGATAAATACATGAACCTACACGTATCATATAACATCATATCCTTTTTTTTTTTTTTTTTTTTTTT  
CTAGGCTT

CCAATCATTTTGCTACTTTCCCGGTTCTCCCTTTATTATAAAACACTTCAGAAAAATATTCTGCTACTATTC  
CTTACTTTACTATAAGAATTTTGTTCACAAAAAATAAATAAAAAAATAATCATACTCTATTACTA  
TGGCTAAC

GCTAGGTGGAATTCGCGCTGAAACAGATCACAATGAAGATCTAAGAATACAGAAACAATAAAGGTTAATGC  
CCAGTTTTACATTTTTTTTTTTTCACTTTCACTTTGCTAGCGAGCGATGCGATTGAGAAAAAATAGAAA  
ATTTTTTC

TTTATAGATCATCCTGTCAATTTTTTTTTTTATTTTTTTTTTGCAAAGCTCCCTTTTTCTGAAACCAACA  
AAATATAAAAAAATGATAAGCAGGATTTTTCTTTTAATAATTCCTTAAATTAACCTAACAAGCTGAA  
GCCCTTAC

CCAGAGTATCTTTACCCACATTCAATATGAGGTGTCAGCCATAATTATTTACATGATAAATACTGATATT  
TTTTCTTTTTCGCGATATATTGAAAAGAAAAAATGCGAGGTGATTCCTCATCGCATGTATTCATTTT  
AACGACAT

ATTATAGAAAGTATTTGTCCTACAAAAAAGGTTGGAGATAAAATTAATGCATTTTTTCATTAGATATATAT  
ATATATTCATATATATTGTTTAAAGTTACCATTTTGTATGTTTTCTTTGACCTTACTATGCAACCAATGCA  
GGTGGTGG

AAAAGCGTAAGGAGATAAGAAAAACAAAAAGGGCTACATTTTAGAATAAATTTGAATCATATGTAGAAAAGC  
TTGTAAATAAGAAACCGTCATATTCTTTTTTTTTTTTTGACCGCGTATGAATCAGTAATTTATTTTCAATTT  
GAATTACA

CAGTCGCTTTTAATTTAACATCAAAGGAATCTATGGTGTGGCCGTTGATATTTTCGCGATGGTATGCCGAA  
AAAGGAAATAACGCAGATTGCGCGTAGTAACGAATGGATTTGACGCGTTTCTTCGATGAAAAGTGGGAA  
TAATAATA

ACGTATAGTTGATGATTAGAAACGAGCTTTTTTATGCCATCGTCATCTATATATATATTTGTATCACTTT  
AATAGTTATTTTAAATATTTGATAACAACCTTTCTAATAGTATTGTTATGGAAGGTTTGTGCTGGAGGAA  
AAAAAGAA

TTCTTACGCGTTGCGTGTA AACATCCTCTCATTCAAGACAGGGTTTTCTAAAAGCAATAGGGGTAGTTTA  
ATAATTCTTATATAATCATCATATACACTATTTTTAGTTCTTAATTCTTTAATACAACTTATTAATGTGC  
TCTCCATT

TTTTCCGCGATTAATTCGCCGAGAATACGACAAAAAAGATAAACATCAGAAAATTCTATTATTAGATT  
AGATTTTATATTAGATAATGAATTAATACAGGTAATAATTATAGAGAGGAAATAAAAATAAACAGATAAGT  
TATTTACA

CAAATTTTCTACCTCTTCGTTAAACCTTCTTCGCTTGTACTTATATTATTATGTTGGCTTTTCAAGTTTA  
TATATTTTTAAAGGAAAAAATAACTTTTTTCATTTTTTCGTTATAAACAGAACC GTTATACATATTGAGAT  
GGTTAAGG

GGCTTATCTGCCACAGTTTAATTTTTTTTTTAATTTTATTTCTTTTTTTTTTTATTTAACTAGAACTGGCTA  
AAAATAAGCAACGGTCCGTGTAGATTACTGTTTCGAACGAGGAACAACCTGAAGGAAAAGTTTTTTATTTTC  
CGCGAAGT

ATTACGCTTTTCTACCAACATTTGCCACCCTTGGAAACCAGAAGAGAATATACATCATTCCGGGGTTGCCCTGC  
CCATTTATATCGTATATTGTGATGATATACCTTTTTTTTTTTTTTTTCGCTGCGTTTTTTTTTCTCGACACGTG  
TCGAAGAA

TTTCTCCATATTTTTGCGGCCCAACTTGTTGCAGAATTGAAAACCTTGTATAATACTAATAATAATTTATAA  
TAATAACAATAATAATTTATAACAATAATAACAATGCCAAACAATTTATATGGGTAACCAGTTTTTGGTAC  
TGTTTGCC

ATTCAAATTGTTTTCCCTTAGGTATATATATATATATATATATATATATATATATATATTTTTCCCTGTATATATCTAT  
GTAAATGACGAAAACGCATGACATTTTAAAACCTACCCCGGGTTTGACCACAACCCACCGTTCATCTAATA  
TTAACCCG

GATTTGAAAGCCCATTCTTGCCAGTACGCCAATAAAGTGTGTGCGCGCAGAATAGATCTTCATGTAATTCCT  
TTTTCCCTTTTATGCAATCTATAATGTTAATCAGCGTAGATCACTATATACGCTTTTTTTTTTTTTTTTTTCA  
GCTCCGAT

TCTTGTTTTCCCTTCATTTTACAAAATCTGGTGTAATCCTCGATTCCATTGTGATTTAAAAATAATTAATT  
ACTGTATAAGATTCTATATAGACAATTAATTGAAAATAGTATTACTTCTTTAACTCGCTTAGGATTTTTTT  
TATTTTTT

GTTTTTTAATAAAAAAAGAAGCAGTTACAGGCGCATTACAAAGTTTGAGAAGAAAGGAAAAATGTCATTTG  
GTTATATAAATTTTTTTTCTTAATGGAGATTGAGGCAGCAATAAAATGTGGGATGAAAAAAAAAAAAAAG  
GCACTTGA

AATTC CAGAAGAAGGCATTGATCCGTCCACTTATTTGAATAATTAATAAAGGAAAAAAGATACGTTTTTTA  
TATAGATTATATAAAGATTTTGTATTATTCAAACGAACAAAACAAAACAAAAAGGGGAAGTGGAAAAAAT  
TAGCAGTT

ACATTCGTGACCGAACAAATGAGATATTATTGAGTACCGGGAGTATTATGTGTCATAATTTGTAGTATTATC  
TGTGTGACGGATTAAGTTTGTCTATCTCAAATGCCGCGCGCGCAATTGCTCATGATATAATAATAGCTAAT  
AATATGAT

TATATGTACTAACATATGTACTAAACAGAAACACAATATGAATTACAAC TAATACTATATTATTTGTCTCC  
TTTTTTTATTAGTATTA AAAATTACCGTTACTGGTTAAAATGGAATACAGCTCATCCATTTAAAAA  
AAAAATAG

GCACGCGGTAAATAATGATTTGTGCGAGTCTATTGACCACAAAACCCGCGGAAACCTAGTTAGCCCAAAA  
GGAAATGGATAGCATATGAAAACGAAACGAAACGTCTTTTTGCACGGCAGAAAGAGCTTAGTAGGACCCG  
GGACAAAT

TCCGCGTCCGCTAATTCGCGCGGCTTGCCACTTAACCCCGTCCAGTTAATTTGCCAAGCAGCGGCCGCACG  
TTGGAACGTTTTTCGCCGATTTATTTATTATTATTATACATGTTGACGTTGGTGCCCTTTTGTATATACTG  
GAGCCTAA

TATATATGTTATATTATTGTTAATTAATATTATTATGCGTATTTTCCTTTTCTTTATTAGTATAGTATTA  
ATGACAGTAATAATAATAATAATAGTAACAATATCTCTTTTTTTTTTTTTCAGTGAGCTTTTATTTTTTTTTT  
ATTGCTCT

TCTAATAGGGCGTGTTTCAAAATTTTATGCGTCCGGTGACTTCAATTTGGCGCCCGTTGAGATTATCTAAAA  
AATGCTTTTTATTTATTTAAGCGCTTTTTGTTTTGACGAATGTATTTATGTTTTGTATATATATGAGCGTT  
TTTTTTTT

GAAATTACTAAAAAAGAAAAAAGAACGGGGGTGTAATAATTTGTAGTTCATTATTGCAATTATAT  
ATCTATATCTATATATGTATATAACATTAACATGTGCATGTACACACGTAATCGCGCGTGTACATGTCTAT  
ATGTGTTA

AACTTTTTAAGTTGAGAACTAAAAAGCAGTATTGTTTTCGAATATGTATTATTTTTTTTTTATTTTTTTTTT  
TACTCGTTATCAATATATATATATACATGTATATTACTAAAAGAATGAGAAAATAAGATAGGATCCTG  
GAAGGGGG

AATCTAAAGAGAAATTAATAAAGAAAAAAGAACGGGGGTGTAATAATTTGTAGTTCATTATT  
GCAATTATATATCTATATCTATATATGTATATAACATTAACATGTGCATGTACACACGTAATCGCGCGTGT  
ACATGTCT

CTTCCGGCAGAACTTCGAAAGTGAAAAAAGAAAAAAGAACGGGGGTGTAATAATTTGTAGTTCATTATT  
ACTATTAATAAATCGTTTAGAAATGATTCATTTATAAAATTCGTTACTTGCGGTCATTGGCAATAGATTCA  
GCTGCGGT

TCGATGAGCTCTTCCGGCAGAACTTCGAAAGTGAAAAAAGAAAAAAGAACGGGGGTGTAATAATTTGTAG  
CTACTTATATACTATTAATAAATCGTTTAGAAATGATTCATTTATAAAATTCGTTACTTGCGGTCATTGGC  
AATAGATT

TATTCTGATAAATCTAAAGAGAAATTAATAAAGAAAAAAGAACGGGGGTGTAATAATTTGTAG  
GTTCAATTATTGCAATTATATATCTATATCTATATATGTATATAACATTAACATGTGCATGTACACACGTA  
TCGCGCGT

TTCTTGGCCGTCGATGAGCTCTTCCGGCAGAACTTCGAAAGTGAAAAAAGAAAAAAGAACGGGGGTGTA  
AATATTAATACTACTTATATACTATTAATAAATCGTTTAGAAATGATTCATTTATAAAATTCGTTACTTGC  
GGTCATTG

AAATAGCTTCTCTTTGTGGCCGGGGCGCGGGGGGACGAGGCAAAAAGCAAAGAAAAGCAAAAAAATAAA  
AAAAAAACAAAAAACAGGGGTATGAGAAAAGACACGCTTTTCCACGCGCAGCAAAAAGGAAAAGGAA  
AAGGAAAC

TGTAAATGTTTCTTGGCCGTCGATGAGCTCTTCCGGCAGAACTTCGAAAGTGAAAAAAGAAAAAAGAAC  
AAATAATAATAATTAATACTACTTATATACTATTAATAAATCGTTTAGAAATGATTCATTTATAAAATTC  
CGTTACTT

CCTTTTCAAAGGAGCATGATACCAATAATTTATATTGCCTTACGCCTCTTATTTTTTATATCCTCTTTTT  
AGATTTTATTAATTTTTTTTTTTTTTATTTATATACATATAATGTGCCCTGCTTTTTTACAACCATACGTTTT  
GTTTTTTA

TCGACGAGGAACTTTTTAAGTTGAGAACTAAAAAGCAGTATTGTTTTCGAATATGTATTATTTTTTTTTA  
TTTTTTTTTACTCGTTATCAATATATATATATACATGTATATTACTAAAAGAATGAGAAAATAAGA  
TAGGATCC

AAAAAAGAAAAAAAAAAGAACGGGGGTGTAATAATTTGTAGTTCATTATTGCAATTATATATCTATATCT  
ATATATGTATATAACATTAACATGTGCATGTACACACGTAATCGCGCGTGTACATGTCTATATGTGTTACT  
TGA ACTAT

AAATTTCCGGCATTGAACTTGATTCTAAATGCTACATACAATTACGCGCGCTGTTTTGATATACACACACAT  
ATATATATATATACATTGTGTAAAGAAAAATTCAAAGCTTAGTAAAACATACAGATCATGGAGAAAAAAAA  
AAACCGAA

CTACATACAATTACGCGCGCTGTTTTGATATACACACACATATATATATATATACATTGTGTAAAGAAAAAT  
TCAAAGCTTAGTAAAACATACAGATCATGGAGAAAAAAAAAAAAACCGAATACTTGTGTTACCAGAAGGATC  
CACTGACT

AAAACATCGCTCTTCAGGGAAATCTTACGCGCTATTTTTACAGTCGCGCGGGTCTTAACCATAATTTTT  
TACCGCTGCAAATATTTGAATGCTATAAGAGCAGATAAAAAATAGATTATAGAAATTAACCTGTTAAACA  
ATTATCCA

CTCTTTGTGGCCGGGGCGCGGGGGGACGAGGCAAAAAGCAAAGAAAAGCAAAAAAATAAAAAAAAAACA  
AAAAACAGGGGTATGAGAAAAAGACACGCTTTTCCACGCGCAGCAAAAAGGAAAAGGAAAAGGAACTC  
TTTATTAT

ATTGAACTTGATTCTAAATGCTACATACAATTACGCGCGCTGTTTTGATATACACACACATATATATATAT  
ATACATTGTGTAAAGAAAAATTCAAAGCTTAGTAAAACATACAGATCATGGAGAAAAAAAAAAAAACCGAATA  
CTTGTGTT

CCGGGGCGCGGGGGGACGAGGCAAAAAGCAAAGAAAAGCAAAAAAATAAAAAAAAAACAAAAAACAGG  
GGTATGAGAAAAAGACACGCTTTTCCACGCGCAGCAAAAAGGAAAAGGAAAAGGAACTCTTTATTATTG  
GACCTTAA

ACAGTAACCTAATTGCTCAAATTTTGAGAGTTAAAGGAAAGAATAAAATATATAAATGATACGTTTATACC  
CGTAAAAAAAAAAAAATATAAAACAAAAAAGGATCTCATAAGACGATTTGTTGGGATATGTCCACATCTT  
TCGGCTAT

CACGTGAACCACAGTAACCTAATTGCTCAAATTTTGAGAGTTAAAGGAAAGAATAAAATATATAAATGATA  
CGTTTATACCCGCTAAAAAAAAAAAAATATAAAACAAAAAAGGATCTCATAAGACGATTTGTTGGGATATG  
TCCACATC

ATAACCCTGACATTACATTTAGGGAATAATCGCCCCAATATAGGTTACAAAACATTAATATATATGTAAAT  
ATATGTGCGGTATATATATATATATATATATAAAGGGAAAATTAATATTCTATCATTAAAGTGAAGAA  
GAAAGGTG

AGGAGCATGATACCAATAATTTATATTGCCTTACGCCTCTTATTTTTTATATCCTCTTTTTAGATTTTATT  
AATTTTTTTTTTTTTATTTATATACATATAATGTGCCCTGCTTTTTTACAACCATACGTTTTTTTTGTTTTTAA  
TTTCTTGC

TGAAGCAACTCAAGCGCAATGAGAAAAGTACTATACAAATATGTAAAAAATTGCTACCAAAAAAAAAAAAA  
AAAAAATTTAAAAACTCTGATAATATAGTAAAAATTATTGGTACATTGTGAATTAATTTATGCGTTTTGC  
CCTCAAAT

AACTTCGAAAGTAAAAAAAAAAAAAAAAAAAAAAAAATAATAATAATTAATACTACTTATATACTATTAAAA  
AATCGTTTAGAAATGATTCATTTATAAAATTCGTTACTTGCGGTCAATTGGCAATAGATTCAGCTGCGGTT  
TCCCAAAG

TTGATACAGTATAACCCTGACATTACATTTAGGGAATAATCGCCCCAATATAGGTTACAAAACATTAATAT  
ATATGTAAATATATGTGCGGTATATATATATATATATATAAAGGGAAAATTAATATTCTATCATTAA  
AAGTGAAG



AGACATATCTTTTAAATGTTAAAACATCGCTCTTCAGGGAAATCTTACGCGCTATTTTTACAGTCGCGC  
GGGTCTTAACCATAATTTTTTACCGCTGCAAATATTTGAATGCTATAAGAGCAGATAAAAAATAGATTATA  
GAAATTAA

AACTTGATCATCGACGAGGAACTTTTTAAGTTGAGAACTAAAAAGCAGTATTGTTTTCGAATATGTATTA  
TTTTTTTTTATTTTTTTTATTACTCGTTATCAATATATATATATACATGTATATTATTACTAAAAGAATGA  
GAAAATAA

ACACTTGAATCACGTGAACCACAGTAACCTAATTGCTCAAATTTTGAGAGTTAAAGGAAAGAATAAAATAT  
ATAAATGATACGTTTATACCCGCTAAAAAAAAAAAAATATAAAACAAAAAAGGATCTCATAAGACGATTTG  
TTGGGATA

GCTCGGTGGCAAATAGCTTCTCTTTGTGGCCGGGGCGCGGGGGGACGAGGCAAAAAGCAAAGAAAAGCAA  
AAAAATAAAAAAAAAAAAACAAAAAACAGGGGTATGAGAAAAAGACACGCTTTTCCACGCGCAGCAAAAAG  
GAAAAAGG

TTGTGCCAGGCGGCAAAAAGACCCCTACGGAGGCGTTGTAAAAAGGCAAAAATTAACGCGAATTTGTATAG  
TGCATCTAAAAAATAATTAAGTATAAAAAATAGATAAAGGAAATCAAGTGTCTTTTTTTTTTTTTTTGGT  
TTATTGTT

TTTAAATGTTAAAACATCGCTCTTCAGGGAAATCTTACGCGCTATTTTTACAGTCGCGCGGGTCTTAAC  
CATAATTTTTTACCGCTGCAAATATTTGAATGCTATAAGAGCAGATAAAAAATAGATTATAGAAATTAACC  
TGTTAAAA

GAAATCTTACGCGCTATTTTTACAGTCGCGCGGGTCTTAACCATAATTTTTTACCGCTGCAAATATTTGAA  
TGCTATAAGAGCAGATAAAAAATAGATTATAGAAATTAACCTGTTAAAACAATTATCCAAAATGTAGTAAG  
TATTTATC

GTTGAGAACTAAAAAGCAGTATTGTTTTCGAATATGTATTATTTTTTTTTTTTTTTTTTTTTTATTACTCGTTAT  
CAATATATATATATACATGTATATTATTACTAAAAGAATGAGAAAATAAGATAGGATCCTGGAAGGGGGAT  
CAGGTAAA

AAAAAGCAGTATTGTTTTCGAATATGTATTATTTTTTTTTTTTTTTTTTTTTTATTACTCGTTATCAATATATAT  
ATATACATGTATATTATTACTAAAAGAATGAGAAAATAAGATAGGATCCTGGAAGGGGGATCAGGTAAAGA  
TATAAAGT

TCTATTTTTTTTTTTTTTTTTTTTTTTTTTTTCGACCTCATCTCATCGCGCTTTCCATTCATCATATTGTACGA  
AAACAAAGCACAAATCGTAATAAAAAGACATCCTGATAATTAGCAAAGGGCTAACCATATAGTCTAAGTTTA  
GTAGTTCA

CATTACATTTAGGGAATAATCGCCCCAATATAGGTTACAAAACATTAATATATATATGTAATATATATGTGCGC  
GTATATATATATATATATATATATAAAGGGAAAATTAATATTCTATCATTAAAGTGAAGAAGAAAGGTGGA  
TTTAAATT

GCTCTTCAGGGAAATCTTACGCGCTATTTTTACAGTCGCGCGGGTCTTAACCATAATTTTTTACCGCTGCA  
AATATTTGAATGCTATAAGAGCAGATAAAAAATAGATTATAGAAATTAACCTGTTAAAACAATTATCCAAA  
ATGTAGTA

ATAACTTTTATGTAAAATGTTTCTTGGCCGTCGATGAGCTCTTCCGGCAGAACTTCGAAAGTGAAAAAAA  
AAAAAAAAAAAAATAATAATAATATTAATACTACTTATATACTATTAAAAAATCGTTTAGAAATGATTCAT  
TTATAAAA

ATTCTAAATGCTACATACAATTACGCGCGCTGTTTTGATATACACACACATATATATATATATACATTGTG  
TAAGAAAAATTCAAAGCTTAGTAAAACATACAGATCATGGAGAAAAAAAAAAAAACCGAATACTTGTGTTAC  
CAGAAGGA

ACAACAAATAAAATGAAGGATCTATGGATAAGTGGATGTTTCTATTTTTTTTTTTTTTTTTTTTTTTTTTTTTTTTTTTTTCG  
ACCTCATCTCATCGCGCTTTCCATTTCATCATATTGTACGAAAACAAAGCACAAATCGTAATAAAAGACATCC  
TGATAATT

AGGGAATAATCGCCCCAATATAGGTTACAAAACATTAATATATATGTAAATATATGTGCGCGTATATATAT  
ATATATATATATAAAAGGGAAAATTAATATTCTATCATTAAAGTGAAGAAGAAAGGTGGATTTAAATTCC  
AAGTCTTT

ACTTTAGCAATTGATACAGTATAACCCTGACATTACATTTAGGGAATAATCGCCCCAATATAGGTTACAAA  
ACATTAATATATATGTAAATATATGTGCGCGTATATATATATATATATAAAAGGGAAAATTAATAT  
TCTATCAT

TCTATGGATAAGTGGATGTTTCTATTTTTTTTTTTTTTTTTTTTTTTTTTTTTTTTTTTTTCGACCTCATCTCATCGCGCTTT  
CCATTTCATCATATTGTACGAAAACAAAGCACAAATCGTAATAAAAGACATCCTGATAATTAGCAAAGGGCTA  
ACCATAAT

AATGAAATAGGCCGTCTACGGCCGTCTACGGCCTATTCCATTGCTAAAAATTTGAATCGTATAAAGGGATA  
TTACCCGGAAAAGAAACGCATTAACAAAAAAAAAAAAAAAAAAAAAAAAACGAAAAAGTGGTTAAGTGATTGACTG  
ACCCTTGA

TTATATTGCCTTACGCCTCTTATTTTTTATATCCTCTTTTTTAGATTTTATTAATTTTTTTTTTTTTATTTATA  
TACATATAATGTGCCCTGCTTTTTTACAACCATACGTTTTTTGTTTTTTAATTTTCTTGCATTTTAAACTG  
AATAGTGA

CGGCAAAAAGACCCCTACGGAGGCGTTGTA AAAAGGCAAAAATTAACGCGAATTTGTATAGTGCATCTAAA  
AAAAATAATTAAGTATAAAAATAGATAAAGGAAATCAAGTGTTCCTTTTTTTTTTTTTTTGGTTTATTGTTG  
ACACTGGT

AGGAGGTTTTCTTTTTCAAAGGAGCATGATACCAATAATTTATATTGCCTTACGCCTCTTATTTTTTATA  
TCCTCTTTTTTAGATTTTATTAATTTTTTTTTTTTTATTTATATACATATAATGTGCCCTGCTTTTTTACAACCA  
TACGTTTT

AAAATTTCTATGAAACATCAAATTAATCACGTGCTTTTTTAAAAATATAAATTTAATTTCTATTTCTATTT  
CAATATTTTATTAATAAAAAATTTGAAAAATATATAAAAATTGTAGCAGTATTAGATTTCCGAAAAGAAAA  
AAAGGTTT

ATTGCCATCCTTGTGCCAGGCGGCAAAAAGACCCCTACGGAGGCGTTGTA AAAAGGCAAAAATTAACGCGA  
ATTTGTATAGTGCATCTAAAAAATAATTAAGTATAAAAATAGATAAAGGAAATCAAGTGTTCCTTTTTTT  
TTTTTTTTG

TACCAATAATTTATATTGCCTTACGCCTCTTATTTTTTATATCCTCTTTTTAGATTTTATTAATTTTTTTTT  
TTTATTTATATACATATAATGTGCCCTGCTTTTTTACAACCATACGTTTTTTGTTTTTTAATTTTCTTGCAT  
TTTAAAC

GAGAAAAGTACTATACAAATATGTAAAAAATTGCTACCAAAAAAAAAAAAAAAAAAATTTAAAACTCTGA  
TAATATAGTAAAAATTATTGGTACATTGTGAATTAATTTATGCGTTTGCCCTCAAATCCTTTTCTATAT  
CGTCCAAT

GATGTGCATATAATGTATATACATACATTTAGCATATGTAATACATTCGTACATGTATAGAAATATATGTT  
TATATATATATATATATATATATGTATATACGAACTCGGTTTAAACGCATAGTTGGTAAAAGATTTAATGTA  
GATAAAAA

AATTAATCACGTGCTTTTTTAAAAAATATAAATTTAATTTCTATTTCAATATTTATTAATAAAAA  
ATTTGAAAAATATATAAAAATTGTAGCAGTATTAGATTTCCGAAAAGAAAAAAGGTTTCAAGAAAAGGAA  
AAGAAAA

TTACGCCTCTTATTTTTTATATCCTCTTTTTAGATTTTATTAATTTTTTTTTTTTTATTTATATACATATAAT  
GTGCCCTGCTTTTTACAACCATACGTTTTTTGTTTTTAAATTTTCTTGCATTTTAAAACCTGAATAGTGACC  
TGGGTATT

CAAGCGCAATGAGAAAAGTGA CTATACAAATATGTAAAAAATTGCTACCAAAAAAAAAAAAAAAAAAATTTA  
AAAACCTGATAATATAGTAAAAATTATTGGTACATTGTGAATTTAAATTTTATGCGTTTTGCCCTCAAATCC  
TTTTCTAT

ACTATACAAATATGTAAAAAATTGCTACCAAAAAAAAAAAAAAAAAAATTTAAAACCTCTGATAATATAGTA  
AAAATTATTGGTACATTGTGAATTTAAATTTTATGCGTTTTGCCCTCAAATCCTTTTTCTATATCGTCCAATTT  
TGAGTCAA

GATTGATCTCAGACATATCTTTTTAAATGTTAAAACCTCATCGCTCTTCAGGGAAATCTTACGCGCTATTTTT  
ACAGTCGCGCGGGTCTTAACCATAATTTTTTACCGCTGCAAATATTTGAATGCTATAAGAGCAGATAAAAA  
ATAGATTA

CTTTTTATAACGTTTTCTTTCTTTTTTTTTTCTTTCTTACATAGTATTCAACTGTATATTTAACATGTTTTA  
CGTATTTTTTAAGAAAAAATTACTAAACGCGATAATATTAAGCAAATATTTATCTCATAGTTCTCGAACTCA  
TTTTATTTT

ACATACATTTAGCATATGTAATACATTCGTACATGTATAGAAATATATGTTTATATATATATATATATATA  
TATGTATATACGAACTCGGTTTTAACGCATAGTTGGTAAAAGATTTAATGTAGATAAAAAACACATAAGTTT  
TATACGCA

TAGGTAGCTGGTAAAAAAGCGATTGATCTCAGACATATCTTTTTAAATGTTAAAACCTCATCGCTCTTCAGGG  
AAATCTTACGCGCTATTTTTTACAGTCGCGCGGGTCTTAACCATAATTTTTTACCGCTGCAAATATTTGAAT  
GCTATAAG

CTTTATCAGCAATGAAATAGGCCGTCTACGGCCGTCTACGGCCTATTCCATTGCTAAAAATTTGAATCGTA  
TAAAGGGATATTACCCGGAAAAAGAAACGCATTAAAAAAAAAAAAAAAAAAAAAAACGAAAAAGTGGTTAAG  
TGATTGAC

ATTATTAGGAGATGTGCATATAATGTATATACATACATTTAGCATATGTAATACATTCGTACATGTATAGA  
AATATATGTTTATATATATATATATATATATATATGTATATACGAACTCGGTTTTAACGCATAGTTGGTAAAAG  
ATTTAATG

TGTTGACTAATAAAATCAATACCAAACCTGACAACAAATAAAATGAAGGATCTATGGATAAGTGGATGTTTT  
CTATTTTTTTTTTTTTTTTTTTTTTTTTTTTTTTCGACCTCATCTCATCGCGCTTTCCATTCATCATATTGTACGAA  
AACAAAGC

CACGTTGACGTGCTTCTTAGTCCTTGTTCCCTTTTTTTTTTTGTTAGGTTAACCATTTATTTTCTAAACGG  
GAAATAAGCAGGCGGGGAGCTGAATATAATTAACTTTTCGCGTCATGGTTAGTGACGCGTCACTTCAAACGC  
GGGTAACA

TAAAATCAATACCAAACCTGACAACAAATAAAATGAAGGATCTATGGATAAGTGGATGTTTTCTATTTTTTTT  
TTTTTTTTTTTTTTTTTTTTTTCGACCTCATCTCATCGCGCTTTCCATTCATCATATTGTACGAAAACAAAGCAC  
AATCGTAA

TGAAACATCAAATTAATCACGTGCTTTTTAAAAAATATAAATTTAATTTTCAATTTTCTATTTCAATATTTAT  
TAAATAAAAAATTTGAAAAATATATAAAAAATTGTAGCAGTATTAGATTTCCGAAAAGAAAAAAGGTTTCA  
AGAAAAGG

AACTAAAAAAGGAATGAAAAAAAAAAAAAAAAAAGTTCAAAAATAGTAACAGATATCTTTTCGAAAAAGTTAAA  
AACTGGTAAAAAATTTTGAATAGAGTATATAAAAACTAATAAATATGTTTAGTTATCATACACCATAGAAT  
AACTACTA



AAAAAAAAAGAACGGGGGTGTAATAATTTGTAGTTCATTATTGCAATTATATATCTATATCTATATATGTAT  
ATAACATTAACATGTGCATGTACACACGTAATCGCGCGTGTACATGTCTATATGTGTTACTTGAACATATA  
TGTTTTGA

CAGATGGATACAGAATAGGAATCCTAAATATAAACACTATATTTATTTATTTTTTTTCGAATAAAAGTCATG  
TTAGCAATATTTATATAGTTGATTTTTCTGCATTTATTATATAATTGGCGGCATAGTAACATCAAAAAAA  
AAAAAAA

ATCGGTTAAGGTTATAAAGTTAGGTAGCTGGTAAAAAAGCGATTGATCTCAGACATATCTTTTAAATGTTA  
AAACTCATCGCTCTTCAGGGAAATCTTACGCGCTATTTTTACAGTCGCGCGGGTCTTAACCATAATTTTT  
ACCGCTGC

GTTATAAAGTTAGGTAGCTGGTAAAAAAGCGATTGATCTCAGACATATCTTTTAAATGTTAAAACTCATCG  
CTCTTCAGGGAAATCTTACGCGCTATTTTTACAGTCGCGCGGGTCTTAACCATAATTTTTTACCGCTGCAA  
ATATTTGA

GGACTCTCAAAAAAATGTATTAATAAATAAAAGAACTTAAATATAGACTTTTTATTTCGCATGCATATAA  
AAATAATTAATTAATAAATAACTGTAAAAAAGTAATAAATAAATATCTCCTCCGACGACAT  
AGCCTATT

TCGCCATAAGAGGAGGTTTTCTTTTTCAAAGGAGCATGATACCAATAATTTATATTGCCTTACGCCTCTT  
ATTTTTTATATCCTCTTTTTAGATTTTATTAATTTTTTTTTTTTTATTTATATACATATAATGTGCCCTGCTT  
TTTACAAC

AGCAATGTGCACACTTGAATCACGTGAACCACAGTAACCTAATTGCTCAAATTTTGAGAGTTAAAGGAAAG  
AATAAAATATATAAATGATACGTTTATACCCGCTAAAAAAAAAAAAATATAAAACAAAAAAGGATCTCATA  
AGACGATT

TTCTTCCATCTTTTTAATCTTTGTTTCCTTTTTTTACATCATATTACTTCTACCTACTCTACTCTATTCTA  
ATTTCAATTGATTTTTTTTTATTTTATTTTTTTTTTTGTTAATAAAAGAAGAAAAAAGTTAAAAACGAATAA  
GAGGCTGT

GGGTTTTTTTTCTTTGCAATTTTTTTTTCTGTTCTCCTAAAGCATAACAAATAAATCCTTTTTTTTTATTTT  
TATTTATTTTGTATTTATCATCTATATAGCAATAATACTTTGTTTTTATTCGTATTTACACTTTTTCT  
TTTTCTT

TCCTTGTTCTCTTTTTTTTTTTGTTAGGTTAACCATTTATTTCTTAAACGGGAAATAAGCAGGCGGGGAGC  
TGAATATAATTAACCTTTCGCGTCATGGTTAGTGACGCGTCACTTCAAACGCGGGTAACAAAATCAAGTTGT  
TTTTAGCC

AAAAAATGTATTAATAAATAAAAGAACTTAAATATAGACTTTTTATTTCGCATGCATATAAAAAATAATTA  
TTAATAAATAACTGTAAAAAAGTAATAAATAAATATCTCCTCCGACGACATAGCCTATTTG  
GCAGCCTT

TCTTTTTTTTTTTGTTAGGTTAACCATTTATTTCTTAAACGGGAAATAAGCAGGCGGGGAGCTGAATATAAT  
TAACCTTTCGCGTCATGGTTAGTGACGCGTCACTTCAAACGCGGGTAACAAAATCAAGTTGTTTTTAGCCGC  
CGAAGGTA

GCAACAAACCGCGAAAAAGCATAAGAAACATAAAAAAATATAAAAAAAGGAGATAATAATAAGATGTGA  
AGGATTTGAATTAGTGAAAAATGATAAGTCTACACTATTATTATTAACGAAATGCAATTTCTTTTATTT  
TCTTTTAT

TTGCCCTTAAACGTATACGAGGTATTCATTAATGTGTGTTGTAAGTATTTAGATTGACATCTATAAGAGAG  
ATGAACATATATATATATATATATATATATATACATGCATATTTACTATAAACGCGGGTTTATTCTGCCAGG  
CAAAGGCA

ACCCCTACGGAGGCGTTGTAAAAAGGCAAAAATTAACGCGAATTTGTATAGTGCATCTAAAAAATAATT  
AAGTATAAAAATAGATAAAGGAAATCAAGTGTTCCTTTTTTTTTTTTTTTGGTTTATTGTTTGACACTGGTGA  
TTTGCTTA

ATTAIAAAAAAAAAAAAAAAAAAAGGCAAAAAGTGGTTAAGTGATTGACTGACCCTTGATAGTTTTGTAC  
AATTATACACTCGTTCTGATTAIAAACTTGTTTATAIAAATCTTTTTAAAGAAAGAGAAGATCGTGTTTA  
TTGCTTTT

TTACGCGCGCTGTTTTGATATACACACACATATATATATATATACATTGTGTAAGAAAAATTCAAAGCTTA  
GTAAACATACAGATCATGGAGAAAAAAAAAAAAACCGAATACTTGTGTTACCAGAAGGATCCACTGACTGG  
ACTTGGGT

ACAGCTAAAACAGAGACAAAACACTGCATGCCTCTTCTCCCCTTTATTATCACCTTTAAAAAGATAAAAAA  
GAACTGGAAAAAGGTAAAAAAAAAAAAAAAAAATTAATAAATACGAATACGTTTTCTCATGACCATTGTA  
CTAGTAAT

GGTATTCATTAATGTGTGTTGTAAGTATTTAGATTGACATCTATAAGAGAGATGAACATATATATATATAT  
ATATATATATATACATGCATATTTACTATAAACGCGGTTTATTCTGCCAGGCAAAGGCAATTTGCTTTTTGT  
TCGCCAGG

AGTGGATGTTTTCTATTTTTTTTTTTTTTTTTTTTTTTTTTTTTTCGACCTCATCTCATCGCGCTTTCCATT  
CATCA  
TATTGTACGAAACAAAGCACAAATCGTAATAAAGACATCTGATAATTAGCAAAGGGCTAACATAATAG  
TCTAAGTT

GAACTGAATCTTTATCAGCAATGAAATAGGCCGTCTACGGCCGTCTACGGCCTATTCCATTGCTAAAAAT  
TTGAATCGTATAAAGGGATATTACCCGGAAAAGAAACGCATTAIAAAAAAAAAAAAAAAAAAAGCAAAA  
AGTGGTTA

GATCCTTGCGGGGTCTTGCCTATTCTTTTTTGGTACTAATAAATCAATACCAAACCTGACAACAAATAA  
AATGAAGGATCTATGGATAAGTGGATGTTTCTATTTTTTTTTTTTTTTTTTTTTTTTTTCGACCTCATCTCA  
TCGCGCTT

GCGCTATTTTTTACAGTCGCGCGGGTCTTAACATAATTTTTTACCCTGCAAAATTTTGAATGCTATAAGA  
GCAGATAAAAAATAGATTATAGAAATTAACCTGTTAAACAATTATCCAAATGTAGTAAGTATTTATCTT  
ACGTAAAA

AGGCGTTGTAAAAAGGCAAAAATTAACGCGAATTTGTATAGTGCATCTAAAAAATAATTAAGTATAAAA  
ATAGATAAAGGAAATCAAGTGTTCCTTTTTTTTTTTTTTTGGTTTATTGTTTGACACTGGTGAATTTGCTTAA  
CAGCGCTT

TAAACACTATATTTATTTATTTTTTTCGAATAAAGTCATGTTAGCAATATTTATATAGTTGATTTTCCTG  
CATTATATATAATTGGCGGCATAGTAACATCAIAAAAAAAAAAAAAAAAAAATTCAAATTGCACTACTTAT  
AGCAGTAG

TATTTTTTATATCCTCTTTTTTAGATTTTATTAATTTTTTTTTTTTTTATTTATATACATATAATGTGCCCTGCT  
TTTTACAACCATACGTTTTTTGTTTTTTAATTTCTTGCATTTTAAACTGAATAGTGACCTGGGTATTAT  
ACTACAGT

GGAATGAAAAAAAAAAAAAAAAAGTTCAAAAATAGTAACAGATATCTTTCGAAAAAGTTAAAACTGGTAAA  
AAATTTTGAATAGAGTATATAAIAAATAAATAATGTTTAGTTATCATAACCATAGAATAACTACTAGA  
GATATTAT

AAGAACAAATAGGCTACACAGGACTCTCAIAAAAAAAAAATGTATTAATAAATAAAGAACTTAAATATAGACT  
TTTTATTTCGCATGCATATAIAAATAATTAATTAATAAATAACTGTAAAAACTAGAATAAIAAAGTAATA  
AATATCTC

ATCCTCTTTTTAGATTTTATTAATTTTTTTTTTTTTTTATTTATATACATATAATGTGCCCTGCTTTTTTACAACC  
ATACGTTTTTTGTTTTTTAATTTTCTTGCATTTTAAAACCTGAATAGTGACCTGGGTATTATACTACAGTTG  
AAATTGCT

TCAAAATGCAGCACCAATTGCAAATAACGACATTGATAATAATTTACAGTCTTTTTATTTTGATAATAGCA  
ACTAAAAAGGAATGAAAAAAAAAAAAAAAAAAGTTCAAAATAGTAACAGATATCTTTTCGAAAAAGTTAAAA  
ACTGGTAA

GGGTCTTGCCTATTCTTTTTTGTGACTAATAAAATCAATACCAAACCTGACAACAAATAAAATGAAGGAT  
CTATGGATAAGTGGATGTTTCTATTTTTTTTTTTTTTTTTTTTTTTTTTTTTTTTTTTCGACCTCATCTCATCGCGCTTTC  
CATTCATC

TCTTTATTCTCTTTTTATAACGTTTTCTTTCTTTTTTTTTTCTTCTTACATAGTATTCAACTGTATATTTA  
ACATGTTTTACGTATTTTAAAGAAAAATTACTAAACGCGATAATATTAAGCAAATATTTATCTCATAGTT  
CTCGAACT

CGCCCCAATATAGGTTACAAAACATTAATATATATGTAAATATATGTGCGCGTATATATATATATATATAT  
ATATAAAGGGAAAATTAATATTCTATCATTAAGTGAAGAAGAAAGGTGGATTTAAATTCCAAGTCTTTTC  
AATTGTTC

TTTTTACATCATATTACTTCTACTCTACTCTATTCTAATTTCAATTGATTTTTTTTTTATTTTTATTTTT  
TTTTTTGTTAATAAAAGAAGAAAAAACTTAAAAACGAATAAGAGGCTGTCTTTGTTCCGTAGTATATGCCT  
ATTTCTT

GCCGTCTACGGCCTATTCCATTGCTAAAAATTTGAATCGTATAAAGGGATATTACCCGAAAAGAAACGCA  
TTAAAAAAAAAAAAAAAAAAAAAACAGAAAAAGTGGTTAAGTGATTGACTGACCCTTGATAGTTTTGTACA  
ATTATACA

AAAACGTAGGCAACCATAACAAATTTCCGGCATTGAACTTGATTCTAAATGCTACATACAATTACGCGCGCT  
GTTTTGATATACACACATATATATATATATACATTGTGTAAGAAAAATTCAAAGCTTAGTAAAAACATAC  
AGATCATG

ATATCTTTTCGAAAAAGTTAAAAACTGGTAAAAATTTGAATAGAGTATATAAAAACTAATAAATATGTTT  
AGTTATCATAACCATAGAATAACTACTAGAGATATTATTTTCAATTTTCGTTTTTCATTTTTTTTTATTTTTTT  
CTTTTCAA

GAAATGGCTCATTATTAGGAGATGTGCATATAATGTATATACATACATTTAGCATATGTAATACATTCGTA  
CATGTATAGAAATATATGTTTATATATATATATATATATATATATGTATATACGAACTCGGTTTAAACGCATAG  
TTGGTAAA

GCACCAATTGCAAATAACGACATTGATAATAATTTACAGTCTTTTTATTTTGATAATAGCAACTAAAAAAG  
GAATGAAAAAAAAAAAAAAAAAAGTTCAAAATAGTAACAGATATCTTTTCGAAAAAGTTAAAAACTGGTAAAA  
AATTTTGA

CCTGACAAAAAAAAAAAAAATTAATTTTGGCCTGGAAAAATCTTCTCCTTAAATACAAAAAGATTCTTTTT  
TATAGAATGTCATAATTCACGAACAGTTAAAAAATATAAACACACAACGTAACACAGATGCCGGGTTACG  
ATATCCGA

ATCTGCATCTAAGAACAAATAGGCTACACAGGACTCTCAAAAAAAAAATGTATTAATAAATAAAAGAACTTA  
AATATAGACTTTTTTATTCGCATGCATATAAAAAATAATTAATTAATAAATAACTGTAAAAACTAGAATAAT  
AAAAGTAA

CCGCAATACTGAAATGGCTCATTATTAGGAGATGTGCATATAATGTATATACATACATTTAGCATATGTAA  
TACATTCGTACATGTATAGAAATATATGTTTATATATATATATATATATATATGTATATACGAACTCGGTT  
TAACGCAT

TCTACACTATTATTATTAACGAAATGCAATTTTCCTTTATTTTCTTTTATTACTATTATCATTACTATTAT  
TATTAGTATTATTATTTTTTTTACTTATTTTTTATATTAACCTATGTTAAATTACTATATTATTATTTTTGTCT  
AACTCTAT

ATTGCTACCAAAAAAAAAAAAAAAAAAATTTAAAACTCTGATAATATAGTAAAAATTATTGGTACATTGTG  
AATTAATTTTATGCGTTTGCCTCAAATCCTTTTCTATATCGTCCAATTTTGAGTCAATGTTCTCAATTG  
TGATACCA

AAATGAAGGATCTATGGATAAGTGGATGTTTCTATTTTTTTTTTTTTTTTTTTTTTTTTTTTTTTTTTTTCGACCTCATCTC  
ATCGCGCTTTCATTCCATCATATTGTACGAAAACAAAGCACAATCGTAATAAAAGACATCCTGATAATTAG  
CAAAGGGC

ACTCAAATAATCAAAATGCAGCACCAATTGCAAATAACGACATTGATAATAATTTACAGTCTTTTTATTTT  
GATAATAGCAACTAAAAAAGGAATGAAAAAAAAAAAAAAAAAAGTTCAAAAATAGTAACAGATATCTTTCGAA  
AAAGTTAA

CCATACACCCATAAGCCTTAACCGCAGCCCTCCTCTCCCCTAAACGTTTCTTTTTCTTTTTCCATTTTTT  
TTTTTTTTTTAGTTTTACTTTCTTTTTATTTCGAAAAATCTTTTCTATATTTTTTCAAGGGTAACCTCATCG  
CCATGCAA

TTCTCTCCATTTCTTCCATCTTTTTTAATCTTTGTTTCTTTTTTTTACATCATATTACTTCTACCTACTCTA  
CTCTATTCTAATTTCAATTGATTTTTTTTTATTTTATTTTTTTTTTTTTGTTAATAAAAGAAGAAAAAACTTAA  
AAACGAAT

TATGTAAAAAATTGCTACCAAAAAAAAAAAAAAAAAAATTTAAAACTCTGATAATATAGTAAAAATTATTG  
GTACATTGTGAATTTAAATTTTATGCGTTTGCCTCAAATCCTTTTCTATATCGTCCAATTTTGAGTCAATG  
TTCTCAAT

CTTTTTATTTTGATAATAGCAACTAAAAAAGGAATGAAAAAAAAAAAAAAAAAAGTTCAAAAATAGTAACAGA  
TATCTTTTCGAAAAAGTTAAAACTGGTAAAAAATTTTGAATAGAGTATATAAAAACTAATAAATATGTTTA  
GTTATCAT

TTTTTAATCTTTGTTTCTTTTTTTTACATCATATTACTTCTACCTACTCTACTCTATTCTAATTTCAATTG  
ATTTTTTTTTATTTTATTTTTTTTTTTTTGTTAATAAAAGAAGAAAAAACTTAAAAACGAATAAGAGGCTGTCT  
TTGTTCCG

TGATAATAGCAACTAAAAAAGGAATGAAAAAAAAAAAAAAAAAAGTTCAAAAATAGTAACAGATATCTTTCGA  
AAAAGTTAAAACTGGTAAAAAATTTTGAATAGAGTATATAAAAACTAATAAATATGTTTAGTTATCATA  
ACCATAGA

ACATTGATGATCTTTATTCTCTTTTTATAACGTTTTCTTTCTTTTTTTTTCTTTCTTACATAGTATTCAAC  
TGTATATTTAACATGTTTTACGTATTTTTAAGAAAAAATTACTAAACGCGATAATATTAAGCAAATATTTA  
TCTCATAG

TCCCTTTAGTGCAACAAACCGCGAAAAAGCATAAGAAACATAAAAAAAAAATATAAAAAAAGGAGATAATAA  
TAAGATGTGAAGGATTTGAATTAGTGAAAAATGATAAGTCTACACTATTATTATTAACGAAATGCAATTT  
TCCTTTAT

AGGCTACACAGGACTCTCAAAAAAAAAATGTATTAATAAATAAAAGAACTTAAATATAGACTTTTTATTTCGC  
ATGCATATAAAAAATAATTAATTAATAAATAACTGTAAAAAAGTAGAATAATAAAAGTAATAAATATCTCCT  
CCGACGAC

AAATGATAAGTCTACACTATTATTATTAACGAAATGCAATTTTCCTTTATTTTCTTTTATTACTATTATCA  
TTACTATTATTATTAGTATTATTATTTTTTTTACTTATTTTTTATATTAACCTATGTTAAATTACTATATTAT  
TATTTTGT



TCCTATAAAATATTTAAAAAGAACCAAAAAAAAAATGGATAGAAGAATGCTTGAGGCAATAATAATGATTAT  
CTATTTTATATATACATACATAATCATTTAAGTTTTTTTTTTTAAAGATATTTTCGATTTAGCCGAATCTGCT  
CAATGCCT

ATATTAAACTAAAATTTCTATGAAACATCAAATTAATCACGTGCTTTTTAAAAATATAAATTTAATTTCA  
TTTTCTATTTCAATATTTATTAATAAAAAATTTGAAAAATATATAAAAAATTTGTAGCAGTATTAGATTTCC  
GAAAAGAA

CTCTGCTATTTTGTGACGTTCAATTTTAATTGACGCGAAAAAGAAAAATAAGAAGGGCAAAAAGAAAAAG  
CGCAGCGGGTAGCAAATTTGGAATCGCATAAAAAGAAAAAATATCAAAGAAAAAGAGTCATCTCAA  
CATATGTC

GAAATGCAATTTTCTTTTATTTTCTTTTATTACTATTATCATTACTATTATTATTAGTATTATTATTTTT  
TACTTATTTTTATATTAACATGTTAAATTACTATATTATTATTTTGTCTAACTCTATATTGAGGCTGTC  
TTTCGTTG

TATTA AAAAGAACCAAAAAAAAAATGGATAGAAGAATGCTTGAGGCAATAATAATGATTATCTATTTTATA  
TATACATACATAATCATTTAAGTTTTTTTTTTTAAAGATATTTTCGATTTAGCCGAATCTGCTCAATGCCTCT  
TCGATGAC

GAACGATGAATGCATATACATATGTCGCGACTCCTTTTTTTTCCATTATAGCGGCATCGCTTTATTTTCGCGT  
TTTAATTCATTTTCTTTTTTCTTCATTTCTTTCTGCATATGCAAACGCGGCAAGAAGTGCCACGGATCCG  
AAGAAAC

AATGAGATCTACTTTAGCAATTGATACAGTATAACCCTGACATTACATTTAGGGAATAATCGCCCCAATAT  
AGGTTACAAAACATTAATATATATGTAAATATATGTGCGCGTATATATATATATATATAAAGGGA  
AAATTAAT

CGTTTTCTTTTTCTTATCGGTTTTATCCGGGTAATAAATTCAGCATATAGAAAAATTTTTCTATTTT  
CTTTTTCTTTTTCATTTTTCTTTTTCTCAGAAAATTTTTTTTTCTAATGCTGGAATGAGATGAGTTAGAAA  
ATTTTTCA

TCTGTGGAAAAC TCAAATAATCAAATGCAGCACCAATTGCAAATAACGACATTGATAATAATTTACAGTC  
TTTTTATTTTGATAATAGCAACTAAAAAGGAATGAAAAAAAAAAAAAAAAAGTTCAAATAAGTAACAGAT  
ATCTTTTCG

CTTTTTTTTTCTTCTTACATAGTATTCAACTGTATATTTAACATGTTTTACGTATTTTTAAGAAAAAATT  
ACTAAACGCGATAATATTAAGCAAATATTTATCTCATAGTTCTCGAACTCATTTATTTCCCATTGATGCCA  
TGAAAACC

AATTTACAGTCTTTTTATTTTGATAATAGCAACTAAAAAGGAATGAAAAAAAAAAAAAAAAAGTTCAAATA  
TAGTAACAGATATCTTTTCGAAAAGTTAAAAACTGGTAAAAATTTTGAATAGAGTATATAAAAACTAATA  
AATATGTT

GTTTTAAGGGTAATAGGAAATATCACGCTACCTGACAAAAAAAAAAAAAAAAATTAATTTTGGCCTGGAAAATT  
CTTCTCCTTAAATACAAAAGATTCTTTTTTATAGAATGTCATAATTCACGAACAGTTAAAAAATATAAA  
CACACAAC

AACGCGTTTTAGACTCACCCTATTTTACTGTCTAAATATTTTTAATGGATATTTATATTAACCATTAT  
CTTGGTTGGTTCCCTAACATCTTGATCATCGAGAAAAAAAAAAAAAAAAAGGACATGAAAAATTCTGACAAT  
GAAAAAAA

GTGAAAAAAAAAAAAAAAAAAAAAAAAATAATAATAATATTAATACTACTTATATACTATTAAAAAATCGTTTTAG  
AAATGATTCATTTATAAATTCGTTACTTGCGGTCATTGGCAATAGATTCAGCTGCGGTTCTCCCAAAGAC  
AACGCATT

CATTGATAATAATTTACAGTCTTTTTATTTTGATAATAGCAACTAAAAAAGGAATGAAAAAAAAAAAAAAAA  
AGTTCAAAAATAGTAACAGATATCTTTGAAAAAGTTAAAAACTGGTAAAAAATTTTGAATAGAGTATATA  
AAAACATA

CTTTGCAATTTTTTTTTTCGTTCTCCTAAAGCATAACAAAATAAATCCTTTTTTTTTATTTTCTATTTATTTT  
GTTATTTATCATCTATATAGCAATAATACTTTGTTTTTATTCGTATTTTACACTTTTTCTTTTTCTTTAT  
GCAGGCAG

AACTTCTATTGTTAAAGTAGACAATTGTATCGTTTTCTTTTTCTTATCGGTTTTATCCGGTAATAAATTCA  
GCATATAGAAAAATTTTTTCAATTTCTATTTTCTTTTTCTTTTTCTTTTTCTTTTTCTCAGAAAATTTTTTT  
TTCTAATG

ATTTATTTATTTTTTTTTCGAATAAAAAGTCATGTTAGCAATATTTATATAGTTGATTTTCTGCATTTATTAT  
ATAATTGGCGGCATAGTAACATCAAAAAAAAAAAAAAAAAAACATTCAAATTGCACTACTTATAGCAGTAGCA  
TCTATAAA

CACTGTAAAAAATTTCTAATTATCGGTTAAGGTTATAAAGTTAGGTAGCTGGTAAAAAAGCGATTGATCTCA  
GACATATCTTTTAAATGTTAAACTCATCGCTCTTCAGGGAAATCTTACGCGCTATTTTTACAGTCGCGCG  
GGTCTTAA

ATTTTTGAGAGTTAAAGGAAAGAATAAAAATATATAAATGATACGTTTTATACCCGCTAAAAAATAAATA  
AAACAAAAAAGGATCTCATAAGACGATTTGTTGGGATATGTCCACATCTTTCGGCTATATACTACATTTA  
GCTGTTTT

ATTGTTTTTCGAATATGTATTATTTTTTTTTTTTTTTTTTATTACTCGTTATCAATATATATATATACATGT  
ATATTACTATAAAGAATGAGAAAATAAGATAGGATCTTGAAGGGGGATCAGGTAAAGATATAAAGTGA  
GATGAAGA

ACGTATACGAGGTATTCATTAATGTGTGTTGTAAGTATTTAGATTGACATCTATAAGAGAGATGAACATAT  
ATATATATATATATATATATATATACATGCATATTTACTATAAACGCGGTTTATTCTGCCAGGCAAAGGCAAT  
TTGCTTTT

ATTAAGAATTTCTATAAAAATATTAAGAAGCAAAAAAAAAAATGGATAGAAGAATGCTTGAGGCAATAA  
TAATGATTATCTATTTTATATATACATAACATAATCATTTAAGTTTTTTTTTTTAAAGATATTTTCGATTTAGC  
CGAATCTG

ACTAATTATATATCACTACTAAAAAAGCCAGAAAAAGAAAAAAGTAAAATAGAAAATAGAAAATAGAAA  
ATAGAAAATAGAAAATTAATAAAGAGCATTTTAAAATTAAGTCTACAAAGTAATACTTGGCATATTGCT  
TAACTCCT

AAAAAAAAAAAAAAAAACAGAAAAAGTGGTTAAGTGATTGACTGACCCTTGATAGTTTTGTACAATTATACAC  
TCGTTCTGATTAAAAACCTGTTTATAAAAATCTTTTTAAAAGAAAGAGAAGATCGTGTATTGCTTTTTCT  
CAAAAAGA

GTTAAAGTAGACAATTGTATCGTTTTCTTTTTCTTATCGGTTTTATCCGGTAATAAATTCAGCATATAGAA  
AAATTTTTCAATTTCTATTTTCTTTTTCTTTTTCTTTTTCTTTTTCTCAGAAAATTTTTTTTTCTAATGCT  
GGAATGAG

AAGAAAAAGAATGAAGTGAAGCAAAAAAAAAAAAAAGATAAAAATGAAAAACAAAAACGGAGGGTA  
TAATCACATGCAGATATAATTTTCGAAATACATTATAGAAATATAATGTGTCACTTATCCTCTTCATTGT  
GGTTATCC

ATTACCCGAAAAGAAACGCATTAAAAAAAAAAAAAAAAAAAAAAAGAAAAAGTGGTTAAGTGATTGACT  
GACCCTTGATAGTTTTGTACAATTATACACTCGTTCTGATTAAAAACCTGTTTATAAAAATCTTTTTAAAA  
GAAAGAGA

AGAAGCCAAAAAACGTAGGCAACCATAACAAATTTCCGGCATTGAACTTGATTCTAAATGCTACATACAAT  
TACGCGCGCTGTTTTGATATACACACACATATATATATATATACATTGTGTAAGAAAAATTCAAAGCTTAG  
TAAAACAT

AACCGCAGCCCTCCTCTCCCCTAAACGTTTCTTTTTCTTTTTCCATTTTTTTTTTTTTTTTTAGTTTTACTT  
TCTTTTTATTTCGGAAAAATCTTTTCTATATTTTTCAAGGGTAACCTCATCGCCATGCAATTAATCACATAG  
ACTCCTTA

AAAAGGCCAAAAATTAACGCGAATTTGTATAGTGCATCTAAAAAAAATAATTAAGTATAAAAAATAGATAAAG  
GAAATCAAGTGTTCCTTTTTTTTTTTTTTTGGTTTATTGTTTGACACTGGTGATTTGCTTAACCAGCGCCTCC  
AGCTTCGC

CGAAAACGAAAACATTTGATCAGATAAGTGATCTGCAAATAAGATATAATAAAAAGTAACAGTTATTTATTT  
AATTA AAAACGCAAATATGTAGTAATACGTGGGACATATAAATTTTCATGAATTA AAAAAAAAAAAAAATGAAAT  
TCAGATTG

TTGTTTCCTTTTTTTTACATCATATTACTTCTACCTACTCTACTCTATTCTAATTTCAATTGATTTTTTTTTA  
TTTTATTTTTTTTTTTGTTAATAAAAAGAAGAAAAAACTTAAAAACGAATAAGAGGCTGTCTTTGTTCCGTA  
GTATATGC

ATTTTTTTTTTTTCATATAAAGAGCTTGC GCGCGTGTTGTTGTTGCTATCCATTTCCATTAGGAACATTTT  
TGGATATTATTTTTT CAGACCCGTAATATACTTAACACATATACCACTAAAGGCCAAAAGAAAGAGAGATCTG  
AAGTGAGA

CAGAGACAAAACACTGCATGCCTCTTCTCCCCTTTATTATCACCTTTAAAAAAGATAAAAAAAGAAACTGGAA  
AAAAGGTAAAAA AAAAAAAAAAAAAATTAATAAATACGAATACGTTTTCTCATGACCATTGTACTAGTAATCA  
CAACCATG

TGGTTTTATTTTTTTTTTTGAATTTTTATTTTCGTGACGTGCTTTTTTTTTCCGTTTTTTGGTTTTAATGCC  
CAAAATAAATAATCCCCTTTTGTATACGTTTTTCTTTGCCTGCCTTTTTATTTCTCAGTGCATTGCCCCTT  
TCTTTCGC

CAGAATAGGAATCCTAAATATAAACACTATATTTATTTATTTTTTTTTCGAATAAAAGTCATGTTAGCAATAT  
TTATATAGTTGATTTTCTGCATTTATTATATAATTGGCGGCATAGTAACATCAAAAAAAAAAAAAAAAAAAC  
ATTCAAAT

TTTCAACTCAATAACTTTTTATGTAAAATGTTTCTTGGCCGTCGATGAGCTCTTCCGGCAGAACTTCGAAAG  
TGAAAAAAAAAAAAAAAAAAAAAAAAAATAATAAATATTAATACTACTTATATACTATTA AAAAAATCGTTTAGA  
AATGATTC

CAATATATGAGAACGATGAATGCATATACATATGTCGCGACTCCTTTTTTTCCATTATAGCGGCATCGCTT  
TATTTTCGCGTTTTAATTCATTTTTCTTTTTCTTCATTTCTTTCTGCATATGCAAACGCGGCAAGAAGTGCC  
CACGGATC

GAGAGTACATTTGCCCTTAAACGTATACGAGGTATTCATTAATGTGTGTTGTAAGTATTTAGATTGACATC  
TATAAGAGAGATGAACATATATATATATATATATATATATATACATGCATATTTACTATAAACGCGGTTTA  
TTCTGCCA

AACC AAAAAAAAAAATGGATAGAAGAATGCTTGAGGCAATAATAATGATTATCTATTTTTATATATACATACA  
TAATCATTTAAGTTTTTTTTTTTTAAAGATATTTTCGATTTAGCCGAATCTGCTCAATGCCTCTTCGATGACAT  
CCTTGTGG

TTTCAAAGAAAAATGCCTCCAACGCGTTTTAGACTCACCCTATTTTTACTGTCTAAATATTTTTAATGGAT  
ATTTATATTA AAACCATTTCTTGGTTGGTTCCCTAACATCTTGATCATCGAGAAAAAAAAAAAAAAAAAAGG  
ACATGAAA

TTTCCCCGCCCATACACCCCATAAGCCTTAACCGCAGCCCTCCTCTCCCCTAAACGTTTCTTTTTCTTTT  
TCCATTTTTTTTTTTTTTTTTTTAGTTTTACTTTCTTTTTATTTCGGAAAAATCTTTTCTATATTTTTCAAGGGT  
AACCTCAT

CGAGAAAAAAAAAAAAAAAAAGGACATGAAAAATTCTGACAATGAAAAAAAAAGAAATTAAGACTCATAATT  
ATTTATTGATAAGGCGAAGACGTAGCAACTATATGTACGTAGAAGTCAATGGCAATCGCGATAAAGCTGTG  
CATTAATG

ATAAAGGGATATTACCCGGAAAAAGAACGCATTAAAAAAAAAAAAAAAAAAAAAAAAAAGAAAAAGTGGTTAA  
GTGATTGACTGACCCTTGATAGTTTTGTACAATTATACACTCGTTCTGATTAAAAACCTGTTTATAAAAAAT  
CTTTTTTAA

ACAAAAGAAAATGGTGCCCTAAATATCTTTCAGATGAAAACTAATTATATATCACTACTAAAAAAGCCA  
GAAAAAGAAAAAAGTAAAATAGAAAATAGAAAATAGAAAATAGAAAATAGAAAATAGAAAATTAAGAGCAT  
TTTTAAAAT

CATTAAGAATGTAGTGATGAGTACTGTAAGTGGTTTTATTTTTTTTTTTGAATTTTTATTTTCGTGACGTG  
CTTTTTTTTCCGTTTTTGGTTTTAATGCCCAAATAAAAATAATCCCCTTTTGTATACGTTTTTCTTTGCC  
TGCCTTTT

CACAAATAATTCCCTTTAGTGCAACAAACCGCGAAAAAGCATAAGAAACATAAAAAAAAAATATAAAAAAAG  
GAGATAATAATAAGATGTGAAGGATTTGAATTAGTGGAAAAATGATAAGTCTACACTATTATTATTAACGA  
AATGCAAT

CTGGGTAAGACTACCTACGACCAGTCATGGATTAGATTAGTAATAGTTTACGCTAATATTAATTTGTTTAA  
CAAATAAGTAGTCAAAAAAAGAAAAAAAAAAAAAAAAAAAAAAAAAAGAAAAGGTGACATTATGCAGAACATATT  
TTATCGAT

GAAGAAGGGTCTGGGTAAGACTACCTACGACCAGTCATGGATTAGATTAGTAATAGTTTACGCTAATATTA  
AATTGTTTTAACAACTAAGTAGTCAAAAAAAGAAAAAAAAAAAAAAAAAAAAAAAAAAGAAAAGGTGACATTATGC  
AGAACATA

TAATAATAGTAATAACAGTAGTAATAGTAATAATAGTAACAATAATAATAATAATAATAATAATAATAATA  
ATAACAATAATAATAATATTAATAATATTAATAATGTCAATACTAATGCAGGGAACGGTAACAATCCAAT  
AGATTCCA

ATCCTAAATATAAACACTATATTTATTTATTTTTTTTTCGAATAAAAAGTCATGTTAGCAATATTTATATAGTT  
GATTTTCTGCATTTATTATATAAATTGGCGGCATAGTAACATCAAAAAAAGAAAAAAAAAATTCAAATTTG  
CACTACTT

AAGGATTTGAATTAGTGGAAAAATGATAAGTCTACACTATTATTATTAACGAAATGCAATTTTCTTTTATT  
TTCTTTTATTACTATTATCATTACTATTATTATTAGTATTATTATTTTTTTACTTATTTTTATATTAACAT  
ATGTTAAA

TACAGTCGCGCGGGTCTTAACCATAATTTTTTACCCTGCAAAATTTTGAATGCTATAAGAGCAGATAAAAA  
AATAGATTATAGAAATTAACCTGTTAAAACAATTATCCAAAATGTAGTAAGTATTTATCTTACGTAAAAAG  
TTCGATGC

TTTTTTTTTTTTTTTTTTTTTCGACCTCATCTCATCGCGCTTTCCATTCATCATATTGTACGAAAACAAAGCA  
CAATCGTAATAAAAGACATCCTGATAATTAGCAAAGGGCTAACATAATAGTCTAAGTTTAGTAGTTCAA  
TGTTTGTT

CAATTTTAATTGACGCGAAAAAGAAAAATAAGAAGGGCAAAAAGAAAAAGCGCAGCGGGTAGCAAATTTG  
GAATCGCATAAAAAGAAAAAATATCAAAGAAAAAGAGTCATCTCAAACATATGTCTGCAGATACTTC  
ATTATCAG

GCTGAAGAAGAGCCGATTTTACCCCAGTCGTATTGTTGGTAGCCTACATAGAGTCGTACGCGTTAGTTAGT  
GTACCAAAAAAAAAAAAAAAAAAATACTCAAAGTATTCAAATATTTGACGAAAAATGGCACATACCTGCAT  
CTAACCTG

TTTAAACAAAACGTATATATGCGCTAAAAGCAGTATAATCATTATTTGTTGTTGTTATTATTATTATTATT  
GTTATTATTATTATTATTATTATTATTATTGAGATTAATATTACCATCTCTCTGTTTTCTTTTCTTTCCCTTCT  
AGCATATA

AATGTTTTGTTGACATGCACTTGAAGCAACTCAAGCGCAATGAGAAAAGTACTATACAAATATGTAAAAA  
TTGCTACCAAAAAAAAAAAAAAAAAAATTTAAAACTCTGATAATATAGTAAAAATTATTGGTACATTGTGA  
ATTAATAAT

AAAAAGTTAAAAACTGGTAAAAAATTTTGAATAGAGTATATAAAAACTAATAAATATGTTTAGTTATCATA  
CACCATAGAATAACTACTAGAGATATTATTTCAATTTTCGTTTTTCATTTTTTTTTTTTTTTTTCTTTTCAATA  
AGGTAACA

TTATAGGAGGATCTGCATCTAAGAACAAATAGGCTACACAGGACTCTCAAAAAAAAAATGTATTAATAAATA  
AAAGAACTTAAATATAGACTTTTTTATTCGCATGCATATAAAAAATAATTAATTAATAAATAACTGTAAAAA  
CTAGAATA

AATGTGTGTTGTAAGTATTTAGATTGACATCTATAAGAGAGATGAACATATATATATATATATATATATAT  
ATACATGCATATTTACTATAAACGCGGTTTTATTCTGCCAGGCAAAGGCAATTTGCTTTTTGTTCCGCGGCT  
CAATGATA

AAAAAAAAAATTAATTTTGGCCTGGAAAATTTCTTCTCCTTAAATACAAAAAGATTCTTTTTTATAGAATGT  
CATAATTCACGAACAGTTAAAAAATATAAACACACAACGTAACACAGATGCCGGTTACGATATCCGAAA  
AAGTTGAT

GAATAAAATATATAAATGATACGTTTATACCCGCTAAAAAAAAAAAAATATAAAACAAAAAAGGATCTCAT  
AAGACGATTTGTTGGGATATGTCCACATCTTTCCGGCTATATACTACATTTAGCTGTTTCCCGTTTTCTTTGT  
ATTATTCC

AAATTCATGTGTTTTAAGGGTAATAGGAAATATCACGCTACCTGACAAAAAAAAAAAAAATTAATTTTGGC  
CTGAAAATTTCTTCTCCTTAAATACAAAAAGATTCTTTTTTATAGAATGTCATAATTCACGAACAGTTAAA  
AAAATATA

AGCCGATTTTACCCCAGTCGTATTGTTGGTAGCCTACATAGAGTCGTACGCGTTAGTTAGTGTACCAAAAA  
AAAAAAAAAAAAAATACTCAAAGTATTCAAATATTTGACGAAAAATGGCACATACCTGCATCTAACCTGAA  
CAGCTTGT

CAGATAAGTGATCTGCAAATAAGATATAATAAAAAGTAACAGTTATTTATTTAATTAAAAAACGCAAATATGT  
AGTAATACGTGGGACATATAAATTTTCATGAATTAAAAAAAAAAAAAATGAAATTCAGATTGAAAATAATGGGG  
ATATAAAA

TTGTGACGTTCAATTTTAAATTGACGCGAAAAAGAAAAAATAAGAAGGGCAAAAAAGAAAAAGCGCAGCGGGT  
AGCAAATTTGGAATCGCATAAAAAAGAAAAAATAATCAAAGAAAAAGAGTCATCTCAAACATATGTCTG  
CAGATACT

CTGTCAACTTTTTGAACATGATTAAGTTTCTTATAAAATATTA AAAAGAACCAAAAAAAAAATGGATAG  
AAGAATGCTTGAGGCAATAATAATGATTATCTATTTTATATATACATACATAATCATTTAAGTTTTTTTTT  
TAAAGATA

TTAACTTTTCGCGTCATGGTTAGTGACGCGTCACTTCAAACGCGGGTAACAAAATCAAGTTGTTTTTAGCCG  
CCGAAGGTAATTGTATCCATAATGAAGGCTAGATTAACCAATAATTTGTAGTGACAAAATTTATAGTCAG  
TAGCAGGT

TTTGAATCGTATAAAGGGATATTACCCGGAAAAGAAACGCATTAAAAAAAAAAAAAAAAAAAAAAAAACAGAAA  
AAGTGGTTAAGTGATTGACTGACCCTTGATAGTTTTGTACAATTATACACTCGTTCTGATTAAAACTTGT  
TTATAAAA

GGCGAACTCATCTGTGGAAAACCAATAATCAAAATGCAGCACCAATTGCAAATAACGACATTGATAATA  
ATTTACAGTCTTTTTATTTTGATAATAGCAACTAAAAAGGAATGAAAAAAAAAAAAAAAAAAGTTCAAAAA  
AGTAACAG

AATTCTAATTATCGGTTAAGGTTATAAAGTTAGGTAGCTGGTAAAAAGCGATTGATCTCAGACATATCTT  
TTAAATGTTAAACTCATCGCTCTTCAGGGAAATCTTACGCGCTATTTTTACAGTCGCGGGTCTTAACC  
ATAATTTT

TGACGCGAAAAAGAAAAATAAGAAGGGCAAAAAGAAAAAGCGCAGCGGGTAGCAAATTTGGAATCGCATA  
AAAAGAAAAAAAATATCAAAGAAAAAGAGTCATCTCAAACATATGTCTGCAGATACTTCATTATCAGCT  
TTGAAAAC

ACAATTGTATCGTTTTCTTTTTCTTATCGGTTTTATCCGGGTAATAAATTCAGCATATAGAAAAATTTTTCA  
TTTCTATTTTCTTTTTCTTTTCATTTTTCTTTTTCTCAGAAAATTTTTTTTTCTAATGCTGGAATGAGAT  
GAGTTAGA

GACACTTTATAAAAAATAAAGGAAAAGTAAAATATAATGCTGAAAATATAGTTGCCTTAAAATGCCATTGA  
TATGATTTTTTTTTAACCTTAAATCTATTGGCCTATAATATTCGCGGCAAAATGAGCATTGAAAATCAGT  
AATAGAAT

CGTGAGCAACAACCTTGATCATCGACGAGGAACTTTTTAAGTTGAGAACTAAAAAGCAGTATTGTTTTCGA  
ATATGTATTATTTTTTTTTTATTACTCGTTATCAATATATATATATACATGTATATTACT  
AAAAGAAT

TTTCAACTTTTTCTATAATTTTCATGCATACATAAATCTGATATCGAAATAAAAATTACATTACACGGTAA  
AAAAATGTTTTCAAAGCTTTTGATCGTAAGCGATTGAAAAATATAACGAATACTCCGATACGGGGAGTC  
GAACCCCG

ATAATAACAATAATAATAGTAATAACAGTAGTAATAGTAATAATAGTAACAATAATAATAATAATAAT  
AATAATAATAATAACAATAATAATAATATTAATAATATTAATAATGTCAATACTAATGCAGGGAACGGTAA  
CAATCCAA

AAAAAAAAAAGTTCAAAAATAGTAACAGATATCTTTGAAAAAGTTAAAAACTGGTAAAAAATTTTGAA  
TAGAGTATATAAAAACTAATAAATATGTTTAGTTATCATAACCATAGAATAACTACTAGAGATATTATTT  
CATTTTCG

ATGTGTCACACCTCGATCGGCAACGTGAATTGGTTACCGTCTATTTAGTAATCAGTACAGAGATATTGAAG  
ATGCCGCTATTTTTTTTTTTTTTATATTTCCGCCGATTTTTATTCTGTGTAGTCGGGTAATGGATGCTATT  
TGTATGCG

TAGGTTACAAAACATTAATATATATGTAAATATATGTGCGCGTATATATATATATATATAAAGGG  
AAAATTAATATTCTATCATTAAAGTGAAGAAGAAAGGTGGATTTAAATTCCAAGCTTTTTCAATTGTTCTA  
AACGTTCA

TATTGTTGGTAGCCTACATAGAGTCGTACGCGTTAGTTAGTGTACCAAAAAAAAAAAAAAAAAAATACTCAA  
AGTATTCAAAATATTTGACGAAAAATGGCACATACCTGCATCTAACCTGAACAGCTTGTTGGACATGTTTT  
AAAATTTT

GTAAAAAGAGAAACCCGAACAGGACAGAGCGTACATTTTTTATATACCTGTTCTTTTTGTGCTTGTAGACGT  
ATATCGTATTATTAATTAAGTAAACCTAATTTGAACCATCGAGATAAAAAAAAAAAAAAACGGAGCACT  
TTTTTGCT

TGAAAATGGAGGAAAAAAAAAAGACGAAATCCAAAAGGCTAAGGAAACGGGTAACCCGTGGTACCCGGGG  
CAGAATCAAACCTTATAATTACTAAAGATATACCATATATTACGATCCCTGCGCCCGGCGTGCTCCACATTA  
AGTAAATG

AAAGATAGAGGAACTGAATTCTTTATCAGCAATGAAATAGGCCGTCTACGGCCGTCTACGGCCTATTCCAT  
TGCTAAAAATTTGAATCGTATAAAGGGATATTACCCGGAAAAGAAACGCATTAIAAAAAAAAAAAAAAAAAA  
AAACAGAA

TTGAGCGACAGCTGAAGAAGAGCCGATTTTACCCAGTCGTATTGTTGGTAGCCTACATAGAGTCGTACGC  
GTTAGTTAGTGTACCAAAAAAAAAAAAAAAAAAATACTCAAAGTATTCAAATATTTGACGAAAAATGGCAC  
ATACCTGC

ATCTGCAAATAAGATATAATAAAAAGTAACAGTTATTTATTTAATTAIAAACGCAAATATGTAGTAATACGT  
GGGACATATAAATTTTATGAATTAIAAAAAAAAAAATGAAATTCAGATTGAAAATAATGGGGATATAIAIAA  
AGTGGACA

AAAAAATTTTTGTTCAAIAAATATAGGAAATTTTAGAAAACGAATGTTGAATGCGTTATAAATAATACAGA  
ATGTACGTGTATATAIAAATATAATAIAIAAATGCAAGAGTTATGGCTTTGTAATAAIAATGATATCAIA  
AAATTACC

ATGCGTAATGACATTGATGATCTTTTATTCTCTTTTTATAACGTTTTCTTTCTTTTTTTTTCTTTCTTACAT  
AGTATTCAACTGTATATTTAACATGTTTTACGTATTTTTAAGAAAAAATTAATAACGCGATAATATTAAG  
CAAATATT

TCGCTGAACCGGTTTTTTTTCTTTGCAATTTTTTTTTCTGTTCTCCTAAAGCATAACAAATAAATCCTTTT  
TTTTATTTTTCTATTTATTTTGTATTTATCATCTATATAGCAATAATATACTTTGTTTTTATTCGTATTTT  
ACACTTTT

TTGCTAAAAATTTGAATCGTATAAAGGGATATTACCCGGAAAAGAAACGCATTAIAAAAAAAAAAAAAAAAAA  
AAAACAGAAAAAGTGGTTAAGTGATTGACTGACCCTTGATAGTTTTGTACAATTATACACTCGTTCTGATT  
AAAACTT

GTAGTGATGAGTACTGTAAGTGGTTTTATTTTTTTTTTTGAATTTTTATTTTCGTGACGTGCTTTTTTTTTT  
CGTTTTTGGTTTTAATGCCCAIAAATAAATAATCCCCTTTTGTATACGTTTTTCTTTGCCTGCCTTTTTTA  
TTTTCTCAG

TAATTTTTTTTTTTTTATTTATATACATATAATGTGCCCTGCTTTTTTACAACCATACGTTTTTTGTTTTTAA  
TTTTCTTGCATTTTTAAIACTGAATAGTGACCTGGGTATTATACTACAGTTGAAATGCTCTCGTGAGGTAC  
ATACTTGA

TTTATTATCACCTTTAIAAAGATAIAAIAAAGAACTGGAAAAAGGTAAAAAAAAAAAAAAAAAATTAIAATA  
AATACGAATACGTTTTTCTCATGACCATTGTACTAGTAATCAIAACCATGATACTTGAATAACTTTTTCTGTT  
TTGTGCTG

ATATATTCIAIAAAAAAAAAAIAIAAIAIAAATAAIAACGTGATAIAACATTAATGAACAATGTATTTACA  
TTCTTAAGCATAGGTGAGAAATTACCTTCTTTACTTTTTTTTTTTTTTTTTGGTGATATTGTATATTAIAAT  
ATATAGTA

GATACCATAACGAAATAIACTTATGTGTAATTTCAACTTTTTCTATAATTTTCATGCATACATAIAATCTGA  
TATCGAAATAIAAATACATTACACGGTAAAAAAAAATGTTTTCAAAGCTTTTGATCGTAAGCGATTGIAIA  
AATATAAC

TCATATAIAACCAIAAGAACTTTTTATACTTTTTAIAATATGCTAIAACTATAGAAATTTAATGAACAAGCCCGCT  
AAATTCACATTTTTCTTTTTGTTGTTGATATTTTTTATTTTTATTTTTTTTTTCAITTTAAGTTTTCCCT  
CACAGCAT

ATGACGAGAAGTAAAAAGAGAAACCCGAACAGGACAGAGCGTACATTTTTTATATACCTGTTCTTTTGTGC  
TTGTAGACGTATATCGTATTATTAATTTAAAAGTAAACCTAATTTGAACCATCGAGATAAAAAAAAAAAAA  
ACGGAGCA

ATATACATTGATGCGTAATGACATTGATGATCTTTATTCTCTTTTTATAACGTTTTCTTTCTTTTTTTTTTC  
CTTCTTACATAGTATTCAACTGTATATTTAACATGTTTTACGTATTTTAAAGAAAAAATTACTAAACGCGA  
TAATATTA

CTTTTCAAGTTCGCCATAAGAGGAGGTTTTCTTTTTCAAAGGAGCATGATACCAATAATTTATATTGCCT  
TACGCCTCTTATTTTTTATATCCTCTTTTTAGATTTTATTAATTTTTTTTTTTTTATTTATATACATATAATG  
TGCCCTGC

TTACCTTCCAGCATTTTTTCAAATGTGTTACACGCCCCTGTAACGTTTATATATAAATATTTTAATATTTA  
ACTTAGCTTATGCATATATAGTTAAAAGGGATAATAACAATAAGAATAAAAAACACAACTGCTGAGATAA  
GAAAAGGA

AAGTGAAGGCAGGTGCCTAAGATTGGGTGGGAAAGTAAATTTACATATAGTTTTTTCTAGGAAAAAATAA  
AAATAATGAAGGAAGGTATACTTATATAAGCGCTGTTTATCGAAACAGACGAGAATAAAAAATGGTTTTAA  
AAAAATCA

GACTGATTCAATATTAATACTAAAATTTCTATGAAACATCAAATTAATCACGTGCTTTTTTAAAAAATATAAA  
TTTTAATTTCATTTTCTATTTCAATATTTATTAATAAAAAATTTGAAAAATATATAAAAAATTTGTAGCAGTA  
TTAGATTT

AATTAACGCGAATTTGTATAGTGCATCTAAAAAAAATAATTAAGTATAAAAAATAGATAAAGGAAATCAAGT  
GTTTCTTTTTTTTTTTTTTTGGTTTTATTGTTTGACACTGGTGATTTGCTTAACCAGCGCCTCCAGCTTCGCGT  
TCGTGAGA

TAGAACCTTAAAAACAGTATTGGTAATTGCAATAGCACCAACCGTAAGTGAGCTAAACTAGTGAAAGATT  
TTCTAAATCATAACGCGCGGAATTCAGTTAATATATTACGTAGTCATCCCTCATCATAGAAGTGTTTTTT  
TTTTTTGC

TCTTGATCATCGAGAAAAAAAAAAAAAAAAAAGGACATGAAAAATTTCTGACAATGAAAAAAAAAGAAATTAAG  
ACTCATAATTATTTATTGATAAGGCGAAGACGTAGCAACTATATGTACGTAGAAGTCAATGGCAATCGCGA  
TAAAGCTG

TGCATATACATATGTCGCGACTCCTTTTTTTCCATTATAGCGGCATCGCTTTATTTTCGCGTTTTAATTCAT  
TTTCTTTTTTCTTCATTTCTTTCTGCATATGCAAACGCGCAAGAAGTGCCACGGATCCGAAGAAAACCT  
AATACATT

TTTGAAACTCTTTAACAAAAGTGTATATATGCGCTAAAAGCAGTATAATCATTATTTGTTGTTGTTATTAT  
TATTATTATTGTTATTATTATTATTATTATTATTATTATTATTATTATTATTATTATTATTATTATTATTATT  
TTTCCCTT

CAAATAACGACATTGATAATAATTTACAGTCTTTTTATTTTGATAATAGCAACTAAAAAAGGAATGAAAA  
AAAAAAAAAAGTTCAAAAATAGTAACAGATATCTTTTCGAAAAAGTTAAAAACTGGTAAAAAATTTTGAAT  
AGAGTATA

TGTCCTTCAGCAAAAAGAAAAAGCAGTTGGGCTCCTGTACGCCATATATACTTTTATATGCGGTTTTTACCCC  
GGAAATCGCGTTTATTAATGTCAATGCGCGATTTCTATTATGGGTTGAAAAAGTTGCACTTCTGTTCTTTT  
CCAAACGA

TATTATTAACGAAATGCAATTTTCTTTATTTTCTTTTATTACTATTATCATTACTATTATTATTATTATTATT  
ATTATTTTTTACTTATTTTTATATTAACATATGTTAAATTAATTAATTAATTAATTAATTAATTAATTAAT  
TGAGGCTG



TAATGGTCTCAAAGAAATAAAAGAAAAGGAAGAAGAAGTAATTGTAATATCAAACGGTTTTTTTATAGTAT  
ATTCTTCTTATTCTATATTTATATATCAATGTTTTATAATAAGATGTTTATTTCATAGCATATCTGGTGGAT  
CGTCTCTA

ACAGATAAAATCTAACAAGGATATATTCAAAAAAAAAAAAACAAAAAATAATAACGTGATAAACAT  
TAATGAACAATGTATTTACATTCTTAAGCATAGGTGAGAAATTACCTTCTTTACTTTTTTTTTTTTTTTTTT  
GTGATATT

TGTATAATAGGTGCCATCTGGACACTTTATAAAAAATAAAGGAAAAGTAAAATATAATGCTGAAAATATAG  
TTGCCTTAAATGCCATTGATATGATTTTTTTTTTAAACCTTAAATCTATTGGCCTATAATATTCGCGGCAA  
ATGAGCAT

ATATTACTTCTACCTACTCTACTCTATTCTAATTTCAATTGATTTTTTTTTTATTTTATTTTTTTTTTTGTTA  
ATAAAGAAGAAAAAACTTAAAAACGAATAAGAGGCTGTCTTTGTTCCGTAGTATATGCCTATTTCTTCT  
AGAAGTTT

ACTTACAACCAAAAAATTTTTGTTCAAAAAATATAGGAAATTTTAGAAAACGAATGTTGAATGCGTTATAA  
ATAATACAGAATGTACGTGTATATAAAAAATAAATAAAAAAATGCAAGAGTTATGGCTTTGTAATAAAAT  
TGATATCA

AGGACAGAGCGTACATTTTTTATATACCTGTTCTTTTGTGCTTGTAGACGTATATCGTATTATTAATTA  
AAGTAAACCTAATTTGAACCATCGAGATAAAAAAAAAAAAAACGGAGCACTTTTTTGCTCATACAAGCAA  
ACCGCATT

GTGAGGTTGGCGTGAGCAACAACCTTGATCATCGACGAGGAACTTTTTAAGTTGAGAACTAAAAAGCAGTA  
TTGTTTTCGAATATGTATTATTTTTTTTTTATTTTTTTTATTACTCGTTATCAATATATATATATACATGA  
TATTATTA

AAATATTCCACACAAATCTATGCACATTACATTCTAGAATAAATTAATAAATAAAAAATATATACATATATA  
TTAATATGTATATATGTATGAATATAGTTTTTCATTACAAAATAAGGCTTACTGTAGAGCATGTTGGAAATA  
TTCAGGAT

TCACCACACACGAAAACGAAAACATTTGATCAGATAAGTGATCTGCAAATAAGATATAATAAAAGTAACAG  
TTATTTATTTAATTAAAAACGCAAATATGTAGTAATACGTGGGACATATAAATTTTCATGAATTAAAAAAA  
AAAATGAA

ATTTTGCCTTGTATAATAGGTGCCATCTGGACACTTTATAAAAAATAAAGGAAAAGTAAAATATAATGCT  
GAAAATATAGTTGCCTTAAATGCCATTGATATGATTTTTTTTTTAAACCTTAAATCTATTGGCCTATAATAT  
TCGCGGCA

TATCACTACTAAAAAAGCCAGAAAAAGAAAAAAGTAAAATAGAAAATAGAAAATAGAAAATAGAAAAAT  
AGAAATTAATAAAGAGCATTAAAAATTAAGTCTACAAAGTAATACTTGGCATATTGCTTAACTCCTCA  
CGCAGAGC

ATTAGTGAAAAATGATAAGTCTACACTATTATTATTAACGAAATGCAATTTTCCTTTATTTTCTTTTATT  
ACTATTATCATTACTATTATTATTAGTATTATTATTTTTTTTACTTATTTTTATATTAAACTATGTTAAATT  
ACTATATT

TTAAAGGAAAGAATAAAATATATAAATGATACGTTTATACCCGCTAAAAAAAAAAAAATATAAAACAAAAA  
AGGATCTCATAAGACGATTTGTTGGGATATGTCCACATCTTTCGGCTATATACTACATTTAGCTGTTTCCC  
GTTTCTTT

CAAAGAACTTTTTATACTTTTTAAATATGCTAAACTATAGAAATTTAATGAACAAGCCCGCTAAATTCACAT  
TTTTCTTTTTGTTGTTGATATTTTTTTTATTTTTTATTTTTTTTTTCAATTTAAGTTTTCCCTCACAGCATAT  
CCTTGAAG

ACATCAGAACCCGGTGTAGAAATGCAAGGTATAATCAGCAAAAAAAAAAAAAAAAAATGTGTAAAAAAAAAAGGT  
CGGTTACCAGCTTTACTAAATGTTTTCTATTGAATAAAATCATAGAATTCATAAGTGACTGTGACATTTT  
CCACCCAG

ACCCAGTCGTATTGTTGGTAGCCTACATAGAGTCGTACGCGTTAGTTAGTGTACCAAAAAAAAAAAAAAAAA  
AAATACTCAAAGTATTCAAATATTTGACGAAAAATGGCACATACCTGCATCTAACCTGAACAGCTTGTTG  
GACATGTT

AAATGCCTCCAACGCGTTTTAGACTCACCCTATTTTTACTGTCTAAATATTTTTAATGGATATTTATATTA  
AAACCATTATCTTGGTTGGTTCCCTAACATCTTGATCATCGAGAAAAAAAAAAAAAAAAAAGGACATGAAAA  
TTCTGACA

ACGGGGGTGTAATAATTTGTAGTTCATTATTGCAATTATATATCTATATCTATATATGTATATAACATTAA  
CATGTGCATGTACACACGTAATCGCGCGTGTACATGTCTATATGTGTTACTTGAACATACTGTTTTGACG  
TGTATGTT

GTAAGTATTTAGATTGACATCTATAAGAGAGATGAACATATATATATATATATATATATATACATGCAT  
ATTTACTATAAACGCGGTTTTATTCTGCCAGGCAAAGGCAATTTGCTTTTTGTTCCGCGGCTCAATGATAAC  
GTTGATGA

ATCGAAAAATGGCTTGGTGAGAAGAAGGGTCTGGGTAAGACTACCTACGACCAGTCATGGATTAGATTAGT  
AATAGTTTACGCTAATATTAATTTGTTTAACTAAGTAGTCAAAAAAAAAAGAAAAAAAAAAAAAAAAA  
AAGAAAAG

AAATATCTTTCAGATGAAAACTAATTATATATCACTACTAAAAAAGCCAGAAAAAGAAAAAAGTAAAA  
TAGAAAATAGAAAATAGAAAATAGAAAATAGAAATTAATTAAGAGCATTTTAAAATTAAGTCTACAAA  
GTAATACT

ATACATTCGTACATGTATAGAAATATATGTTTATATATATATATATATATATATATATATATATACGAACTCGGT  
TTAACGCATAGTTGGTAAAAGATTTAATGTAGATAAAAAACACATAAGTTTTATACGCACGTAATCATGAC  
TATCGCTA

TTTTTTTTCTTCTCCTCATTCTTCCATCTTTTTTAATCTTTGTTTCCTTTTTTTTACATCATATTACTTCT  
ACCTACTCTACTCTATTCTAATTTCAATTGATTTTTTTTTTTTTTTTTTTTTTTTTTTGTTAATAAAGAAGA  
AAAAACTT

AGGAAAAAAAAAAAAAGAAAGCTGAAGAAAAGTATCTCAAGATATTTTCAGTAAATTTTTTTTTTTTTTTGAA  
TTTTCCGTTTAAATATTAAGACCTTAAATCGATAAGTTATGTATCTGTATATACAGGGTGTACTCAATTT  
AGCAATAA

TTTTTTTTCGTTCTCCTAAAGCATAACAAAATAAATCCTTTTTTTTTATTTTCTATTTATTTTGTATTTTATC  
ATCTATATAGCAATAATACTTTGTTTTTATTCGTATTTTACACTTTTTCTTTTTCTTTATGCAGGCAGTG  
TAATTCAT

TGACTCTTCTATTTTTTTTTTTTTCATATAAAGAGCTTGCAGCGTGTGTTGTTGTTTCGCTATCCATTTCCATTA  
GGAACATTTTTGGATATTATTTTTTTCAGACCCGTAATATACTTAACACATATACCACTAAAGGCAAAAGAAA  
GAGAGATC

CTCCTCTCCCTAAACGTTTCTTTTTCTTTTTCCATTTTTTTTTTTTTTTTTTGTATTTTACTTTCTTTTTTATT  
CGGAAAAATCTTTTCTATATTTTTTCAAGGGTAACCTCATCGCCATGCAATTAATCACATAGACTCCTTAAG  
TAACAATG

TCTAACAAGGATATATTCAAAAAAAAAAAAAAACAACAAAAAATAATAACGTGATAAACATTAATGAACAA  
TGTATTTACATTTAAGCATAGGTGAGAAATTACCTTCTTTACTTTTTTTTTTTTTTTTTTTGGTGATATTGT  
ATATTA

GCTGTTGTGTGTAATAGATTGAACGCGTTGGGAATGTAAAACGCGATTAAGAATTTCTGATTTAACGCAG  
GTGCTAGGTTATTAATAGTTTCTTACGCGGATATGTAGGTTCAAGGCTCTATGTACGTATGGAGGAATAGC  
AAAAAAG

TGTTTACGCGTTTTATCCCATTATATGGCACCCAAATCAAATTTAAAAAGAAAAAACGCGTAAACAGTGTC  
GGGTAAGTTCATCCTCTGTTACTTTAATTGCTTCTTTTTTTGAAATTCTAAGTAAACGCGTCATTTTGATC  
CTCAGGAC

CTTATCTACATTTCAAAGAAAAATGCCTCCAACGCGTTTTAGACTCACCCTATTTTACTGTCTAAATATT  
TTTAATGGATATTTATATTAACCATTATCTTGGTTGGTTCCCTAACATCTTGATCATCGAGAAAAAAA  
AAAAAAA

CTAAACGTTTCTTTTTCTTTTTCCATTTTTTTTTTTTTTTTTTAGTTTTACTTTCTTTTTATTTCGGAAAAATC  
TTTTCTATATTTTTCAAGGGTAACCTCATCGCCATGCAATTAATCACATAGACTCCTTAAGTAACAATGGC  
AAGCGAT

CTCGTGACATACAGATAAAATCTAACCAAGGATATATTCAAAAAAAAAAAAACAAAACAAAAAATAATAACG  
TGATAAACATTAATGAACAATGTATTTACATTCTTAAGCATAGGTGAGAAATTACCTTCTTTACTTTTTTT  
TTTTTTTT

GCCTATTCCATTGCTAAAAATTTGAATCGTATAAAGGGATATTACCCGAAAAGAAACGCATTAAAAAAA  
AAAAAAAAAAAAACAGAAAAAGTGGTTAAGTGATTGACTGACCCTTGATAGTTTTGTACAATTATACACT  
CGTTCTGA

AGAGAAATATGAAAAGCAAGAATATAAAAAATAGAACAGGAGCACTTAGTTCGGTTTTTTGCCATCATGTTT  
AATATATATATATATATATATATATATATATATATATATATATATATGTGCGTGCGTGTGTGTGTGTGTGTACAT  
GTATGCGG

TCTTATCGGTTTTATCCGGGTAATAAATTCAGCATATAGAAAAATTTTTCTATTTCTTTTTCTTTCTTT  
TCATTTTTCTTTTTCTCAGAAAATTTTTTTTTCTAATGCTGGAATGAGATGAGTTAGAAAATTTTTCACT  
TTAAACT

TTCTATAATTTTCATGCATACATAAATCTGATATCGAAATAAAAAATTACATTACACGGTAAAAAAATGTT  
TTCAAAGCTTTTGATCGTAAGCGATTGAAAAATATAACGAATACTCCGATACGGGGAGTCGAACCCCGGT  
CTCCACGG

TGTTCAAAAAATATAGGAAATTTTAGAAAACGAATGTTGAATGCGTTATAAATAATACAGAATGTACGTGT  
ATATAAAAAATATAATAAAAAAATGCAAGAGTTATGGCTTTGTAATAAAATTGATATCAAAAAATTACCCA  
AATAAACT

AAACCCAGGAAATATTCCACACAAATCTATGCACATTACATTCTAGAATAAATTAATAAATAAAAAATATA  
TACATATATATTAATATGTATATATGTATGAATATAGTTTTTCATTACAAAATAAGGCTTACTGTAGAGCAT  
GTTGGAAA

AAACAGATAGAAAAAGTATAACCCTAGAATCGAAATCAAAAAATTAGAAAATAAACGTATTGGAATTTTGTG  
CAATTATCATATTAATAACAAAAACAATAAAAAAATCAAAAAAGCTTTGAACTTTCTTTAATTTTTTTCT  
AATTTTCT

AACCATTTATTTCTTAAACGGGAAATAAGCAGGCGGGGAGCTGAATATAATTAACTTTCGCGTCATGGTTA  
GTGACGCGTCACTTCAAACGCGGGTAACAAAATCAAGTTGTTTTTAGCCGCCGAAGGTAATTGTATCCATA  
ATGAAGGC

AAAGCAAAGTAAGAAAAAGAATGAAGTGAAGGCAAAAAAAAAAAAAAGATAAAAAATGAAAAACAAAAA  
ACGGAGGGTATAATCACATGCAGATATAATTTTCGGAAATACATTATAGAAATATAATGTGTCACTTATCC  
TCTTCATT

CAGATGAAAACTAATTATATATCACTACTAAAAAAGCCAGAAAAAGAAAAAAGTAAAATAGAAAATAG  
AAAATAGAAAATAGAAAATAGAAATTAATAAGAGCATTAAAAATTAAGTCTACAAAGTAATACTTG  
GCATATTG

TTGTATAAAGTATACAAGATTGTAAAAATGATTGAAGTATTTTTATATATGTATATTACCTATAAAATTTT  
TTATATTACGTACCGAAGGGGTTTTTTTTAATGCTAAAGCGATTTCATCTTGCTGTAGGTATATTTTTAAATC  
ATCTGGAA

GTGCCATCTGGACACTTTATAAAAAATAAAGGAAAAAGTAAAATATAATGCTGAAAATATAGTTGCCTTAAA  
ATGCCATTGATATGATTTTTTTTTAACCTTAAATCTATTGGCCTATAATATTCGCGGCAAAATGAGCATT  
GAAAATCA

TAGGTTCCGGGTGACGTGAAGATAACGAAAAATGAGTAAAAATTATCTTCTAATTATACATTAGTATTAGCG  
TGAAAATGTACACATATACATATATATATATATATATACTTGAAGGTCTGAAGGAGTTTCAAATGCT  
TCTACTCC

TCTACAACTGGTCCTTAAGATGTTTTATTGAAGACATCATTTTTTATTTTTTTAAGCAGAACGTGCTGTG  
CTCTCCCTTTTGGGCCTTTTACGATTTTCAAAAAATTGGTCTCTAGCGGGATCGAACCCTGATCCCCG  
CGTTATTA

ATAATCGTGGTCGGAACGTGCAATATATGAGAACGATGAATGCATATACATATGTCGCGACTCCTTTTTTT  
CCATTATAGCGGCATCGCTTTATTTTCGCGTTTTAATTCATTTTCTTTTTCTTCATTTCTTCTGCATATG  
CAAACGCG

GGGGACGAGGCAAAAAGCAAAGAAAAGCAAAAAAATAAAAAAACAACAAAAACAGGGGTATGAGAA  
AAAGACACGCTTTTCCACGCGCAGCAAAAAGGAAAAGGAAAAGGAAACTCTTTATTATTGGACCTTAAAC  
CTGAAAAC

GCATTTTTTCAAATGTGTTTACACGCCCTGTAACGTTTATATATAAATATTTTAATATTTAACTTAGCTTA  
TGCATATATAGTTAAAAGGGATAATAACAATAAGAATAAAAAACACAACTGCTGAGATAAGAAAAGGAAG  
CGAATAGT

ACCTTGAAGACTATATTTCTTTTCATCACGTGCTATAAAAAATAATTATAATTTAAATTTTTTAATATAAAT  
ATATAAATTAATAAGTAAAAGTAAAAAAGAAATTAAGAAAAATAGTTTTTGTTCGGAAGATGTAAA  
ATAGGTTG

CTATATTTCTTTTCATCACGTGCTATAAAAAATAATTATAATTTAAATTTTTTAATATAAATATATAAATTA  
AAAATAGAAAAGTAAAAAAGAAATTAAGAAAAATAGTTTTTGTTCGGAAGATGTAAAATAGGTTGAA  
AGTTAGAA

AATGCCTTCGCTTGTATTACGCAAAAAAAAAAAAAAAAAATAAATAAAAAAAAAAAAAAAAAAAAAAAAAAATAGGTATAAA  
TCGTTGGTTCTTTTATGCACAATTATTTAACTATAGTTATCTATTTACGTAAAGGCTTCTATTTTTCTTAA  
TCTACAAG

GCATGTAACAATGCCTTCGCTTGTATTACGCAAAAAAAAAAAAAAAAAATAAATAAAAAAAAAAAAAAAAAAAAAAAAAAAT  
AAGGTATAAATCGTTGGTTCTTTTATGCACAATTATTTAACTATAGTTATCTATTTACGTAAAGGCTTCTA  
TTTTCT

CTTGTATTACGCAAAAAAAAAAAAAAAAAATAAATAAAAAAAAAAAAAAAAAAAAAAAAAAATAGGTATAAATCGTTGGTTT  
TTTTATGCACAATTATTTAACTATAGTTATCTATTTACGTAAAGGCTTCTATTTTTCTTATCTACAAGAA  
ATTGCATG

GCAAAAAAAAAAAAAAAAAATAAATAAAAAAAAAAAAAAAAAAAAAAAAAAATAGGTATAAATCGTTGGTTCTTTTATGCAC  
AATTTTTAACTATAGTTATCTATTTACGTAAAGGCTTCTATTTTTCTTATCTACAAGAAATTGCATGAA  
GTTTAATT

CCTCACTTCAGCGGCTAAAAAAAAAAAAAAAAACACCCGAGTATTAGTGAATATAGATATATATATATATATATA  
TATATATATAGGGGGCCGATAAAAAAGAAGCTTGCAATATTACGCAGATCAGGGATTTACTAAAAGAAAAG  
TAATAAAG

GTATAATATAACCTTGAAGACTATATTTCTTTTCATCACGTGCTATAAAAAATAATTATAATTTAAATTTTT  
TAATATAAATATATAAATTAATAATAGAAAAGTAAAAAAGAAATTAAGAAAAAATAGTTTTTGTTCG  
AAGATGTA

CTATTCTCTCGAGCTCAGTTTTGGGTTTTGGCATGTAAACAATGCCTTCGCTTGTATTACGCAAAAAAAAA  
AAAAATAAATAAAAAAAAAAAAAAAAAAATAAGGTATAAATCGTTGGTCTTTTATGCACAATTATTTAAC  
TATAGTTA

GAGCTCAGTTTTGGGTTTTGGCATGTAAACAATGCCTTCGCTTGTATTACGCAAAAAAAAAAAAAAAAAATAAAT  
AAAAAAAAAAAAAAAAAATAAGGTATAAATCGTTGGTCTTTTATGCACAATTATTTAACTATAGTTATC  
TATTTACG

GATCTGTCCTTACGCGTAATAATTACAAGAAGGTGAGAAAATTGCCTTTTTTTTGCTAATTTTTTTTTTTTTG  
GTACCATATTCAATAATTGATGCTAAATTATAAATTGATTTTTATTGTTTTCTCTTTCTACAATTAATCT  
CTTTTTCT

CCCAAAAAAAAAAAGTACTCGCTTCTTTCCATGTCCGCTTCATATATATATACACATACTAATCAAACCTCT  
ATGTATACATAGAATAAAAAAGAAGCACTATATTTATTTTATAAAAAAAAAAAAAAAAAAATAACAAAAAAG  
TGCAACAT

CTTTAACCTTCCGAGCTATTGATTTTTGATCCTCACTTCAGCGGCTAAAAAAAAAAAAAAAAACACCCGAGTA  
TTAGTGAATATAGATATATATATATATATATATATATATATAGGGGGCCGATAAAAAAGAAGCTTGCAATATT  
ACGCAGAT

ACGCACACGCGCACGCATCCACATTCACTTTTCACTTATAAAATTTCTTCTCTCTAGTTTTATATACGTTGT  
ATTAGAAATATAAAATATGACAATAGTACACTTTGTAGGCTCTCTTTTTTTTTTTTTTTTTTTTTTTCTTATA  
TATTTTTT

CCGAGCTATTGATTTTTGATCCTCACTTCAGCGGCTAAAAAAAAAAAAAAAAACACCCGAGTATTAGTGAATA  
TAGATATATATATATATATATATATATAGGGGGCCGATAAAAAAGAAGCTTGCAATATTACGCAGATCA  
GGGATTTA

ATATAACCTGTATAATATAACCTTGAAGACTATATTTCTTTTCATCACGTGCTATAAAAAATAATTATAAT  
TTAAATTTTTTAATATAAATATATAAATTAATAATAGAAAAGTAAAAAAGAAATTAAGAAAAAATAGTTT  
TTGTTTTT

GTAAAAATAATATATAAACCTGTATAATATAACCTTGAAGACTATATTTCTTTTCATCACGTGCTATAAAAA  
TAATTATAATTTAAATTTTTTAATATAAATATATAAATTAATAATAGAAAAGTAAAAAAGAAATTAAGAA  
AAAATAGT

TTGGGTTTTGGCATGTAAACAATGCCTTCGCTTGTATTACGCAAAAAAAAAAAAAAAAAATAAATAAAAAAAAA  
AAAAAAAAATAAGGTATAAATCGTTGGTCTTTTATGCACAATTATTTAACTATAGTTATCTATTTACGTA  
AAGGCTTC

GCACACGCACACGCGCACGCATCCACATTCACTTTTCACTTATAAAATTTCTTCTCTCTAGTTTTTA  
TATACGTTGTATTAGAAATATAAAATATGACAATAGTACACTTTGTAGGCTCTCTTTTTTTTTTTTTTTTTT  
TTTTCTTA

TTTCATCACGTGCTATAAAAAATAATTATAATTTAAATTTTTTAATATAAATATATAAATTAATAATAGAAA  
GTAAAAAAGAAATTAAGAAAAAATAGTTTTTGTTCGGAAGATGTAAATAGGTTGAAAGTTAGAAAT  
TAGTATTA

GATTTTTGATCCTCACTTCAGCGGCTAAAAAAAAAAAAAAAAACACCCGAGTATTAGTGAATATAGATATATA  
TATATATATATATATATATAGGGGGCCGATAAAAAAGAAGCTTGCAATATTACGCAGATCAGGGATTTACT  
AAAAGAAA

ACTAGACAGAGCGCATAAAAAAGCCTAATCCCTTTTCCGTCTGTATACTTGTGCTCCCTTATAAAAAAAA  
TTAAAAATTAAAAAATAAAAAATAAGAATAGTGTATAAAATTATTTTTGCTTTGATTTTAGTTTATTTATTT  
ACTTTCTA

CGTTCGTCAACTATTCTCTCGAGCTCAGTTTTGGGTTTTGGCATGTAAACAATGCCTTCGCTTGTATTACG  
CAAAAAAAAAAAAAATAAATAAAAAAAAAAAAAAAAAAAAAATAAGGTATAAATCGTTGGTCTTTTATGCACA  
ATTATTTA

AAAGCCTAATCCCTTTTCCGTCTGTATACTTGTGCTCCCTTATAAAAAAAATTA AAAAATTA AAAAATAAAA  
ATAAGAATAGTGTATAAAATTATTTTTGCTTTGATTTTAGTTTATTTATTTACTTTCTAAATACAGTAGGT  
TAAATAAG

GCGGCTAAAAAAAAAAAAAAAAACACCCGAGTATTAGTGAATATAGATATATATATATATATATATATATA  
GGGGGGCCGATAAAAAAGAAGCTTGCAATATTACGCAGATCAGGGATTTACTAAAAGAAAAGTAATAAAGGA  
CTGCTGCT

TGCTATAAAAAATAATTATAATTTAAATTTTTTAAATATAAATATATAAATTA AAAAATAGAAAAGTAAAAAAG  
AAATTAAGAAAATAAGTTTTTGTTCGGAAGATGTAAAATAGGTTGAAAGTTAGAAATTAGTATTATA  
ATAGCAA

GCGCATAAAAAAGCCTAATCCCTTTTCCGTCTGTATACTTGTGCTCCCTTATAAAAAAAATTA AAAAATTA  
AAAAATAAAAAATAAGAATAGTGTATAAAATTATTTTTGCTTTGATTTTAGTTTATTTATTTACTTTCTAAA  
TACAGTAG

CCCTTTTCCGTCTGTATACTTGTGCTCCCTTATAAAAAAAATTA AAAAATTA AAAAATAAAAAATAAGAATAG  
TGTATAAAATTATTTTTGCTTTGATTTTAGTTTATTTATTTACTTTCTAAATACAGTAGGTTAAATAAGGA  
TCGGTTTC

AGACTTTTTCCGATCTAAATAATGCATATAACCGTATCTTTTTTATATGAACCTAGTTTTGCTGTATAAGA  
GCCGAGAAAAAATATAGGAAAATATAGGAAAATATGCAAAATAGAAACACGAATTTTTTTTTTTGTTAGAG  
AAAAAAG

TACGCGTAATAATTACAAGAAGGTGAGAAAATTGCCTTTTTTTGCTAATTTTTTTTTTTTTTGGTACCATATT  
CAATAATTGATGCTAAATTATAAATTGATTTTATTGTTTTCTCTTTCTTACAATTAATCTTTTTCTGG  
CTTTATGA

GAGTAATAAAAAAATTCTAAAAAAAAAACGCTTAAATCGAGGTGGAATATATAAACTTAAGTACGCATATA  
CTCTAGTTCAGTTTAAAAATTAGCTGTTTTTTTTAAAAAAAAAATTCTCTTTCTTTACAAAATGTTCTTAA  
ATGTATGT

TCACTTATAAAATTTCTTCTCTCTAGTTTTATATACGTTGTATTAGAAATATAAAATATGACAATAGTACA  
CTTTGTAGGCTCTCTTTTTTTTTTTTTTTTTTTTTTTCTTATATATTTTTTTTACAATGACCACGGTTTGTACA  
CCTGGGGC

GATACACGGTCCAATGGATAAACATTTTTTATCAACACTATGATATATAAATATAATAGTTTTTTCGTATAT  
ATATTCCTTTTTTTGGTCAATTTTTGAAATTTTCGTAGAAAAGGGAGAGACAAAACACATTATATCAATGA  
AAACGTAC

GCACGCATCCACATTCACTTTCACTTATAAAATTTCTTCTCTCTAGTTTTATATACGTTGTATTAGAAATA  
TAAATATGACAATAGTACACTTTGTAGGCTCTCTTTTTTTTTTTTTTTTTTTTTTTCTTATATATTTTTTTA  
CAATGACC

ACACTTTTATGATCTGTCCCTTACGCGTAATAATTACAAGAAGGTGAGAAAATTGCCTTTTTTTTGTCAATTT  
TTTTTTTTTGGTACCATATTCAATAATTGATGCTAAATTATAAATTGATTTTATTGTTTTCTCTTTCTCA  
CAATTAAT

CTTACGGCTTCAAAAAAGCACCGAACTAATCGAGAAAGCTTATAATATCGGTATACATTTGAATGTATTT  
TAACTATTTCTATATCAAAAAAAAAAAAAAAAAAATTGTATATTTTTTCGTTATTCTCTAATTCGTATCACATT  
TTATCCCT

TTATAGATCCCCCAAAAAAAAAAAGTACTCGCTTCTTTCCATGTCCGCTTCATATATATATACACATACTA  
ATCAAACCTCTATGTATACATAGAATAAAAAAGAAGAACTATATTTATTTTCATAAAAAAAAAAAAAAAAAATA  
ACAAAAA

ATGAATAGCAGAGTAATAAAAAAATTCTAAAAAAAAAACGCTTAAATCGAGGTGGAATATATAAACTTAAG  
TACGCATATACTCTAGTTCAGTTTAAAAATTAGCTGTTTTTTTTAAAAAAAAAAATTCTCTTTCTTTACAAA  
ATGTTCTT

AGTTTAATTTTTGGGTGGTAATGGCTGTGTGACTAGCTATAGAAAGAAAAAATTAATAAAAAAAAAAAAA  
TCAAGTAGTTCCTGCACTGCGACGTCCATTATAGCATTATAAATTGGTCCCTGATTTACGCATGCGATAAA  
CTATTTTT

TCGAAAAGACAGCGAGAAGGGACACTGGAAAAATGGCATAAAACTTTTTCAAGGTTATTATTAGTAAGTTTT  
TTTATTATATGATATATATATATAAAAAATGAAATAAATTATTTCTTGATGGAGCCACTTATTTTTCTTA  
TACCACCG

ATCCAGCTTCCGTTTCGTCAACTATTCTCTCGAGCTCAGTTTTGGGTTTTGGCATGTAAACAATGCCTTCGC  
TTGTATTACGCAAAAAAAAAAAAAATAAATAAAAAAAAAAAAAAAAAAAAAAATAAGGTATAAATCGTTGGTTCT  
TTTATGCA

AAAAATAAATAAAAAAAAAAAAAAAAAAAAAATAAGGTATAAATCGTTGGTTCTTTTTATGCACAATTATTTAA  
CTATAGTTATCTATTTTACGTAAAGGCTTCTATTTTTTCTTATCTACAAGAAATTGCATGAAGTTTAATTTT  
TTTTGTCA

AACGTACAGCACTTTAATTAATATAGACGTCTCTCTATGATTTTTTTTTAAATATTGTATATTTTTGTTTATA  
TCTATATATCAGTATGCGCGCATACTTAGTAAAAGTATAAAAAGCCATTTGCTGCTTCATCGAATATTTTG  
GCTTTTCGT

CGGATGTAAAAGAAAACAGTACTAGACAGAGCGCATAAAAAAGCCTAATCCCTTTTCCGTCTGTATACTT  
GTGCTCCCTTATAAAAAAATTAATAAATAAAAAATAAAAAATAAGAATAGTGTATAAATATTTTTTGCTT  
TGATTTTA

ATTATATTCAATGAATAGCAGAGTAATAAAAAAATTCTAAAAAAAAAACGCTTAAATCGAGGTGGAATATA  
TAACTTAAAGTACGCATATACTCTAGTTCAGTTTAAAAATTAGCTGTTTTTTTTAAAAAAAAAAATTCTCTT  
TCTTTACA

GAGAAATGAAATTAGATCATAAATTAACCTAACAAGGAGAATATATATACGTACATATATATATATATA  
TATATAAGTTATTGTAATTGAGAAAAAATAAACATCATATAAACTTCCGTTTTAATGAACGGGGGAAAA  
TCCATGAT

TTGCCCTTTTTCTATCACGAGGTTACTGAGCCATTGCATGAACGCGCGCGCCTCGGCGGCTTTTTTTTCTA  
CTCTATAAAGCGAAAAGCCAGAAGTTACTATCTCGAATAAAAAACCCCTCGAACTGCCATCTCATTACCG  
AAAATGAA

GACACTGGAAAAATGGCATAAAACTTTTTCAAGGTTATTATTAGTAAGTTTTTTTTATTATATGATATATATA  
TATATAAAAATGAAATAAATTATTTCTTGATGGAGCCACTTATTTTTCTTATACCACCGGCGGCGCTTGTA  
GTCCTTCT

TCTGTATACTTGTGCTCCCTTATAAAAAAATTAAAAATTAAAAATAAAAAATAAGAATAGTGTATAAAAT  
TATTTTTGCTTTGATTTTAGTTTTATTTATTTACTTTCTAAATACAGTAGTTAAATAAGGATCGGTTTCTT  
GAAGAAAT

AGCGAGAAGGGACTGGAAAAATGGCATAAACTTTTCAAGGTTATTATTAGTAAGTTTTTTTTATTATAT  
GATATATATATATATAAAAAATGAAATAAATTATTTCTTGATGGAGCCACTTATTTTTCTTATACCACCGG  
GGCGCTTG

TAAAGGATTTGGTCTGTAAGTCCATTTTTTCATTTTTTCAAATTAATAGTTTTTTTCGGAATATACATATAC  
ATTTTTTTACATACACATAAAAAATATTTCTCTCCCTTTTACGTTTCATCCGCAATCGATAAAAAATGCATTT  
TATATACA

TCTTAACAACCTTTAACCTTCCGAGCTATTGATTTTTGATCCTCACTTCAGCGGCTAAAAAAAAAAAAAAC  
ACCCCGAGTATTAGTGAATATAGATATATATATATATATATATATATAGGGGGCCGATAAAAAAGAAC  
TTGCAATA

TCCATTTTTTCATTTTTTCAAATTAATAGTTTTTTTCGGAATATACATATACATTTTTTTACATACACATAA  
AAATATTTCTCTCCCTTTTACGTTTCATCCGCAATCGATAAAAAATGCATTTTATATACATGAAATGGCGAA  
TTCTTTTTT

AAAAAGAACAACAAAAATAAGTAAAATAATATATAAACCTGTATAATATAACCTTGAAGACTATATTTCTT  
TTCATCACGTGCTATAAAAAATAATTATAATTTAAATTTTTTAATATAAATATATAAATTAAAAAATAGAAAG  
TAAAAAA

TTTAGTTTAGTGCAGCCACATACTACTTTTTTCTTTTTGTTTTTTTTTTTTTATATTTCAAAGGTTAAACT  
CGCTTAGACTATGTCTATAATATAAAAAAATAAGCTCTATTCCGTTTCTTTTATTCTATTTGATATTT  
CATCACAC

AGAAAACAGTACTAGACAGAGCGCATAAAAAAGCCTAATCCCTTTTCCGTCTGTATACTTGTGCTCCCTT  
ATAAAAAAATTAAAAATTAAAAAATAAAAAATAAGAATAGTGTATAAAATTATTTTTGCTTTGATTTTAGT  
TTATTTAT

ACATTCACCTTTCACCTTATAAAATTTCTTCTCTCTAGTTTTATATACGTTGTATTAGAAATATAAAATATGA  
CAATAGTACACTTTGTAGGCTCTCTTTTTTTTTTTTTTTTTTTTTTTCTTATATATTTTTTTACAATGACCAC  
GGTTTGTA

GTTCTTAATATTATATTCAATGAATAGCAGAGTAATAAAAAAATTCTAAAAAAAACGCTTAAATCGAG  
GTGGAATATATAAACTTAAGTACGCATATACTCTAGTTTCAGTTTAAAAATTAGCTGTTTTTTTTAAAAAAA  
AAATTCTC

AATTTCTTCTCTCTAGTTTTATATACGTTGTATTAGAAATATAAAATATGACAATAGTACACTTTGTAGGC  
TCTCTTTTTTTTTTTTTTTTTTTTTTTTTTTCTTATATATTTTTTTACAATGACCACGGTTTTGTACACCTGGGGCTG  
CAATTTTG

CTTCAAAAATTCTAATTTAGCCTCGAAATTGAGAAATGAAATTAGATCATAAATTAACCTCTAACAAAGGAG  
AATATATATACGTACATATATATATATATATATAAGTTATTGTAATTGAGAAAAAATAAACATCATAT  
AAAACCTC

TGGTATGATTCAATACAGAATGCCAAGGGAAACGTACAGCACTTTAATTAATATAGACGTCTCTCTATGAT  
TTTTTTAAATATTGTATATTTTTGTTTATATCTATATATCAGTATGCGCGCATACTTAGTAAAAGTATAAA  
AAGCCATT

TTGATGATTGAGGATGAAATACACTTTTTATGATCTGTCTTACGCGTAATAATTACAAGAAGGTGAGAAAA  
TTGCCTTTTTTTGCTAATTTTTTTTTTTTTTGGTACCATATTCAATAATTGATGCTAAATTATAAATTGATTT  
TATTGTTT



AAATGGCATAAAACTTTTCAAGGTTATTATTAGTAAGTTTTTTTTATTATATGATATATATATATATAAAAA  
TGAAATAAATTATTTCTTGATGGAGCCACTTATTTTTCTTATACCACCGGCGGCGCTTGTAGTCCTTCTCC  
CTGACGTT

AGTATTTGGCTTTTATTTTTTTTTTTTTTCATTTTCTTACTCGCGCTTTTCTTTATTAAGGGCTTTCTCAATT  
AGATGTTAATAATGTCATAAGGCATCGTTATTCCGCTTTATATTGGTAACTCAGCAGTGGTCATTGCCTTC  
GTTTCACGA

AACTTTTTCTCTCCCGGAGAACAAAGTAAGTGGAAAAAATTATACTAATAACAATCTAAAAATGTTTATTA  
GCTAGGATTATACACATAAATATATATATATGTGTGTGTCTATATTTACATATACTAGACCGCAAAAAAAA  
CATAAGGG

AATGCATATAACCGTATCTTTTTTATATGAACCTAGTTTTGCTGTATAAGAGCCGAGAAAAAATATAGGA  
AAATATAGGAAAATATGCAAAATAGAAACACGAATTTTTTTTTTTGTTAGAGAAAAAAGAGATAAGCCCTG  
TAGGGGCT

ACCTCACGGTTTTAGTTTAGTGCAGCCACATACTACTTTTTTCTTTTTGTTTTTTTTTTTTTATATTTCAA  
AGGTTAAACTCGCTTAGACTATGTCTATAATAAAAAAAAAAATAGCTCTATTCCGTTTTCTTTTATTCTAT  
TTGATATT

GAAAGAAAAAATTAATAAAAAAAAAAAAAAAAAAATCAAGTAGTTCCTGCACTGCGACGTCCATTATAGCATTAT  
AAATTGGTCCCTGATTTACGCATGCGATAAACTATTTTTAGCGCAGCCGCATATTATCCGAGAATAAECTTC  
CGACATAA

ACAAAAATAAGTAAAATAATATATAAACCTGTATAATATAACCTTGAAGACTATATTTCTTTTCATCACGT  
GCTATAAAAAATAATTATAATTTAAATTTTTTAATATAAATATATAAATTAATAATAGAAAGTAAAAAAGA  
AATTAAG

TACATAAAACAGTTTAATTTTTGGGTGGTAATGGCTGTGTGACTAGCTATAGAAAGAAAAAATTAATAAAA  
AAAAAAAAAATCAAGTAGTTCCTGCACTGCGACGTCCATTATAGCATTATAAATGGTCCCTGATTTACGC  
ATGCGATA

ATATCTAAATACCTCACGGTTTTAGTTTAGTGCAGCCACATACTACTTTTTTCTTTTTGTTTTTTTTTTTT  
TATATTTCAAAGGTTAAACTCGCTTAGACTATGTCTATAATAAAAAAAAAAATAGCTCTATTCCGTTTTCT  
TTTATTCT

CCAATGGATAAACATTTTTTATCAACACTATGATATATAAATATAATAGTTTTTTCGTATATATATTCCTTT  
TTTTGGTCAATTTTTGAAATTTTCGTAGAAAAGGGAGAGACAAAACACATTATATCAATGAAAACGTACAA  
AAAGTAGA

CTGGCTGGGGTTCCACCTCAAAGAGCCACGCTCTGCTTTTTTTCTATCTGTTTGTGTCATATCTATCTGTC  
TATTTATCTATATATATATTTTTTTTTATATAAAACTATAAAGAATTCTTGATGTATGCCCTTAGGTTGGGCA  
GCTTTTCA

TTCCACCTCAAAGAGCCACGCTCTGCTTTTTTTCTATCTGTTTGTGTCATATCTATCTGTCTATTTATCTA  
TATATATATTTTTTTATATAAAACTATAAAGAATTCTTGATGTATGCCCTTAGGTTGGGCAGCTTTTCAAC  
CTTAGACT

TCTTAATGTATAAAGGATTTGGTCTGTAAGTCCATTTTTTCATTTTTTCAAATTAATAGTTTTTTTCGGAAT  
ATACATATACATTTTTTTACATACATAAAAAATTTCTCTCCCTTTTACGTTTCATCCGCAATCGATAA  
AAATGCAT

TGCAGCCACATACTACTTTTTTCTTTTTGTTTTTTTTTTTTTATATTTCAAAGGTTAAACTCGCTTAGACT  
ATGTCTATAATAAAAAAAAAAATAGCTCTATTCCGTTTTCTTTTATTCTATTTGATATTTCCATCACACTT  
TCATCTTA

TAAAAAAAAAAAAAAAAAAAAAATAAGGTATAAATCGTTGGTTCCTTTTATGCACAATTATTTAACTATAGTTAT  
CTATTTACGTAAAGGCTTCTATTTTTCTTATCTACAAGAAATTGCATGAAGTTTAATTTTTTTTTGTCCAC  
TTTGATCT

TGGGTGGTAATGGCTGTGTGACTAGCTATAGAAAAGAAAAAATTAATAAAAAAAAAAAAAAAAAATCAAGTAGTT  
CCTGCACTGCGACGTCCATTATAGCATTATAAATTGGTCCCTGATTTACGCATGCGATAAACTATTTTTAG  
CGCAGCCG

CAAAAAGCACCGAAACTAATCGAGAAAGCTTATAATATCGGTATACATTTGAATGTATTTAACTATTTTC  
TATATCAAAAAAAAAAAAAAAAAAATTGTATATTTTTCTGTTATTCTCTAATTCGTATCACATTTTATCCCTAA  
GGGAATCT

CAAAATAAACAACTTTTTCTCTCCCGGAGAACAAAGTAAGTGGAAAAAATTATACTAATAACAATCTAAAA  
ATGTTTATTAGCTAGGATTATACACATAAATATATATATATGTGTGTGTCTATATTTACATATACTAGACC  
GCAAAAA

AGGATGAAATACACTTTTTATGATCTGTCCTTACGCGTAATAATTACAAGAAGGTGAGAAAATTGCCTTTTT  
TTGCTAATTTTTTTTTTTTTTGGTACCATATTCAATAATTGATGCTAAATTATAAATTGATTTTATTGTTTTCT  
CTCTTTCC

AACTGAAAAGCGATGAAGAGATGATCATATGATACACGGTCCAATGGATAAACATTTTTTATCAACACTAT  
GATATATAAATATAATAGTTTTTCTGATATATATATTCCTTTTTTTGGTCAATTTTTGAAATTTCTGAGAAA  
AGGGAGAG

TGTGCTCCCTTATAAAAAAAAAATTAATAATTAATAAATAAATAAAGAATAGTGTATAAAATTATTTTTGCT  
TTGATTTTAGTTTATTTATTTACTTTCTAAATACAGTAGGTTAAATAAGGATCGGTTTCTTGAAGAAATTG  
TAACAAGA

AGAGTATGTACGGATGTAAAAGAAAACAGTACTAGACAGAGCGCATAAAAAAGCCTAATCCCTTTTCCGT  
CTGTATACTTGTGCTCCCTTATAAAAAAAAAATTAATAATTAATAAATAAATAAAGAATAGTGTATAAAATT  
ATTTTTGC

TATGACTCTTTTCGAAAAGACAGCGAGAAGGGACACTGGAAAAATGGCATAAAACTTTTCAAGGTTATTATT  
AGTAAGTTTTTTTTTATTATATGATATATATATATAAATAAATAAATAAATAAATAAATAAATAAATAAATAA  
ATTTTTCT

AAGAGCCACGCTCTGCTTTTTTTCTATCTGTTTGTGTCATATCTATCTGTCTATTTATCTATATATATATT  
TTTTTATATAAACTATAAAGAATTCTTGATGTATGCCCTTAGGTTGGGCAGCTTTTCAACCTTAGACTTG  
ATGCTAAC

GTCAAAAGTTTTTTTTGGCCATATGCAGTAAAACTTACCCTTCAAATTGCAAAACCATTAGTTTTATTATA  
TTTTTTTTTTTTTTCTTTTCATTGAAGTATACACGAAATCCCATACGCAAATAAACAGTCGTTGTATCATCAA  
TTTCGGCT

CTCTTGTAATTACCTCATCTCATTATCAAGAAGCAAAATTTAACTATGTATTTTGACCTTATTTTTGTAC  
TCCACTTTTTTTTTTAGTTTTTTTTTAGTTATTTTTTAATTTTTGAAGTAACGGCGATGAGGTGAAGTTTTT  
TTTAACT

CAATACAGAATGCCAAGGGAAACGTACAGCACTTTAATTAATATAGACGTCTCTCTATGATTTTTTTAAAT  
ATTGTATATTTTTGTTTATATCTATATATCAGTATGCGCGCATACTTAGTAAAAGTATAAAAAGCCATTTG  
CTGCTTCA

TTTTATTTTTTTTTTTTCAATTTCTTACTCGCGCTTTTCTTTATTAAGGGCTTTCTCAATTAGATGTTAAT  
AATGTCATAAGGCATCGTTATTCCGCTTTATATTGGTAACTCAGCAGTGGTCATTGCCTTCGTTCCAGGACC  
CTCCCTTA

AATTAATAAAAAAAAAAAAAAAAAAATCAAGTAGTTCCTGCACTGCGACGTCCATTATAGCATTATAAATTGGTCC  
CTGATTTACGCATGCGATAAACTATTTTTAGCGCAGCCGCATATTATCCGAGAATAAATTCCGACATAAGA  
AAATTCGC

TACCTCATCTCATTATCAAGAAGCAAAATTTAACTATGTATTTTGACCTTATTTTTGTACTCCACTTTTT  
TTTTTTAGTTTTTTTTTAGTTATTTTTTAATTTTGAAGTAACGGCGATGAGGTGAAGTTTTTTTTAACTGA  
AAAAGAAG

GATGTGTGATGTTCCTTAATATTATATTCAATGAATAGCAGAGTAATAAAAAAAAAATTCTAAAAAAAAAACGC  
TTAAATCGAGGTGGAATATATAAACTTAAGTACGCATATACTCTAGTTCAGTTTTAAAAATTAGCTGTTTTT  
TTAAAAA

TGCCAAGGGAAACGTACAGCACTTTAATTAATATAGACGTCTCTCTATGATTTTTTTTTAAATATTGTATATT  
TTTGTATATATCTATATATCAGTATGCGCGCATACTTAGTAAAAGTATAAAAAGCCATTTGCTGCTTCATC  
GAATATTT

TTATATCAATGAAAACGTACAAAAAGTAGATAAAGTCAGTGCTTAAACACGTCTTTTCTTAAAAATACTT  
TATTATTTTTTATTTTTATTGAGAGGGTGGTTTTAAAAATAGAAATAGAGAGAGAGGTACATACATAAACATAC  
GCGCACAA

ATACTACTTTTTTCTTTTTGTTTTTTTTTTTTTATATTTCAAAGGTTAAACTCGCTTAGACTATGTCTATAA  
TATAAAAAAAAAAATAGCTCTATTCCGTTTTCTTTTATTCTATTTGATATTTCCATCACACTTTCATCTTAAT  
CACGGATG

ATCCGCATACGCACACGCACACGCACACGCGCACGCATCCACATTCACTTTCACTTATAAAATTTCTTCTC  
TCTAGTTTTATATACGTTGTATTAGAAATATAAAATATGACAATAGTACACTTTGTAGGCTCTCTTTTTTT  
TTTTTTTT

AAGATGAATGTCTCTTTGTTAATTTAGCTAGAGTTTTCTTATTTATTTTTTTTTATTTACACTAATTTCAAT  
CTTTTTCGTTATATTTAGATATTATTAATAATTATTATTATGGAAAAATTTCTTAAAAGGATAGACAGAGG  
GACGCCGT

ATGATGAACCATGAAGAGCATGGTTAGATTGCTGCCAATTTTTTTTTCTTATTTTCGTCATTTTTTTTATCAAG  
ATTTTCCAGTTTTTTTTTTTTTTTTTGGCATTGCTTACTATACGCGAGGGAGGTTCAATTGACACTTTCCGCT  
ACGGCGAT

CATAAGGAGGAAAAAGAAAATTTAAAAGAAAAAAAAAAAAAGAAATAAAAAAGAAAACGGTACTGGATATTGA  
GATAAATTTTCTTCAATTAAGATAATAAACATGTTATATAAAATCAGACAAAATAATATGTAAATTTTT  
AACGTATT

ATTAGAGGCATCTCCGACAATCAGAAGAACACTTCTTGTTATTATAATTACCCATATATTTTTTTTTTTTT  
CAAATTGACTACTAGGAAAAAGTGACAATTTATAGTAAAACCTGGCTAGAAAAACCTACAAGAAAAACAAA  
CCAGGTTA

GAAGTCTTCGACTTAATAAAACTAGCTCTTCAGAGGAAAAAGTGATTACCCTCGTACTTTTCATTTTATA  
TATATATATATATATATATGTACCTATATATTCTTCTTATTATGGCTTTTCTAATTTCTTGCAAGATTCT  
TTGACAGC

TCTAATTTAGCCTCGAAATTGAGAAATGAAATTAGATCATAAATTAACCTAACAAGGAGAATATATATA  
CGTACATATATATATATATATATAAAGTTATTGTAATTGAGAAAAAATAAACATCATATAAACTTCCG  
TTTTAATG

ACCGTATCTTTTTTATATGAACCTAGTTTTGCTGTATAAGAGCCGAGAAAAAATATAGGAAAATATAGGA  
AAATATGCAAAATAGAAACACGAATTTTTTTTTTTGTTAGAGAAAAAAGAGATAAGCCCTGTAGGGGCTCG  
AACCCTA

ACTAGCTATAGAAAGAAAAAATTAATAAAAAAAAAAAAAAAAAATCAAGTAGTTCCTGCACTGCGACGTCCATT  
ATAGCATTATAAATTGGTCCCTGATTTACGCATGCGATAAACTATTTTTAGCGCAGCCGCATATTATCCGA  
GAATAACT

CCTCGAAATTGAGAAATGAAATTAGATCATAAATTAACCTCTAACAAAGGAGAATATATATACGTACATATA  
TATATATATATATAAAGTTATTGTAATTGAGAAAAAATAAACATCATATAAACTTCCGTTTTAATGAA  
CGGGGGAA

TTTTATATGAACCTAGTTTTGCTGTATAAGAGCCGAGAAAAAATATAGGAAAATATAGGAAAATATGCAA  
AATAGAAACACGAATTTTTTTTTTTGTTAGAGAAAAAAGAGATAAGCCCTGTAGGGGCTCGAACCCCTAAC  
CTTATGAT

TGATTCTTTTTTCCCTTTTTCTCAATATTCGCAGGTTATTTTTCTTTTATATATATACATTGTTTGTATCT  
TTTTTTGATTACCATACTTACTATTTTTATATTAGTCATATTAGATGTCACTTTTATATTATCTAAACAAT  
TCAAACCT

ATAATTATAATTTAAATTTTTTAATATAAATATATAAATTAATAATAGAAAGTAAAAAAGAAATTAAGA  
AAAAATAGTTTTTGTTCGAAAGATGTAATAAGGTTGAAAGTTAGAAATTAGTATTATAATAGCAAAAA  
AAATTTAA

GGTTACTGAGCCATTGCATGAACGCGCGCCTCGGCGGCTTTTTTTTTCTACTCTATAAAAGCGAAAAGCC  
AGAAGTTACTATCTCGAATAAAAAACCCCTCGAACTGCCATCTCATTACCGAAAATGAAAGAAAATGAACT  
TAAAAATG

TTGCATATTACTTACGGCTTCAAAAAAGCACCGAACTAATCGAGAAAGCTTATAATATCGGTATACATTT  
GAATGTATTTTAACTATTTCTATATCAAAAAAAAAAAAAAAAAAATTGTATATTTTTCGTTATTCTCTAATTC  
GTATCACA

CCATTGCATGAACGCGCGCCTCGGCGGCTTTTTTTTTCTACTCTATAAAAGCGAAAAGCCAGAAGTTACT  
ATCTCGAATAAAAAACCCCTCGAACTGCCATCTCATTACCGAAAATGAAAGAAAATGAACTTAAAAATGAG  
AAAAGTGT

CGATGAAGAGATGATCATATGATACACGGTCCAATGGATAAACATTTTTTATCAACACTATGATATATAAA  
TATAATAGTTTTTTCGTATATATATTCTTTTTTTGGTCAATTTTTGAAATTTTTCGTAGAAAAGGGAGAGAC  
AAAACACA

ACTTTAATTAATATAGACGTCTCTCTATGATTTTTTTAAATATTGTATATTTTTGTTTATATCTATATATC  
AGTATGCGCGCATACTTAGTAAAAGTATAAAAAGCCATTTGCTGCTTCATCGAATATTTTTGGCTTTTCGTTG  
TACAAAGC

TTTGGACGGCGCGCCGACACATTTTGCTGTTTTCCACTCCGCGGGGATTAAAGACGCCAGTTCGTGCAGCG  
CGACCGCTAATCGATTACGCCGTGCTTGTCTGCATGCTTGTGTGATTTCGCGCTTGTCTATCGTCCACGAGC  
GCGCCCGA

TTATGTTGATATCCAGCTTCCGTTTCGTCAACTATTCTCTCGAGCTCAGTTTTGGGTTTTGGCATGTAAACA  
ATGCCTTCGCTTGTATTACGCAAAAAAAAAAAAAAAAAATAAATAAAAAAAAAAAAAAAAAAATAAGGTATAAAT  
CGTTGGTT

TTTTTGGCCATATGCAGTAAAAACTTACCCTTCAAATTGCAAAACCATTAGTTTTATTATATTTTTTTTTTT  
TTTCTTTTCATTGAAGTATACACGAAATCCCATACGCAATAAACAGTCGTTGTATCATCAATTTCCGGCTGT  
CTGGATGG

AAAAGTACTCGCTTCTTTCCATGTCCGCTTCATATATATATACACATACTAATCAAACCTCTATGTATACAT  
AGAATAAAAAGAAGAACACTATATTTATTTTATAAAAAAAAAAAAAAAAAATAACAAAAAAGTGAACATTT  
ATCAAAAG

TTAAAAGAAAAAAAAAAGAAATAAAAAAAAAAGAAAACGGTACTGGATATTGAGATAAAATTTTCCTTCAATTA  
AGATAATAAACATGTTATATAAAATCAGACAAAATAATATGTAAATTTTAAACGTATTATAATCTTAAAA  
AGTTTTATT

CATTAGACAGAGACTTTTTCCGATCTAAATAATGCATATAACCGTATCTTTTTTATATGAACCTAGTTTTG  
CTGTATAAGAGCCGAGAAAAAATATAGGAAAATATAGGAAAATATGCAAAATAGAAACACGAATTTTTTT  
TTTGTTAG

AAAATTCTAAAAAAAAAACGCTTAAATCGAGGTGGAATATATAAACTTAAGTACGCATATACTCTAGTTCA  
GTTTAAAAATTAGCTGTTTTTTTTAAAAAAAAAAATCTCTTTCTTTACAAAATGTTCTTAAATGTATGTAT  
GTGTGTGT

TATAAAAAAATTTAAAAATTTAAAAATAAAAATAAGAATAGTGTATAAAATTTATTTTTGCTTTGATTTTAG  
TTTATTTATTTACTTTCTAAATACAGTAGGTTAAATAAGGATCGGTTTCTTGAAGAAATTGTAACAAGACT  
CAGAATAA

TTTTTTTTGTGACATATTTAAATTTGCGAAATTTGCAAACGAAAATATAAATATATATGAATGTTAATAAATAA  
ATTATTTAATTGATGATTGAGGATGAAATACACTTTTTATGATCTGTCTTACGCGTAATAATTACAAGAAG  
GTGAGAAA

TTGAACTTTAAGTATTTGGCTTTTTATTTTTTTTTTTTTTCATTTTCTTACTCGCGCTTTTCTTTATTAAGGGC  
TTTCTCAATTAGATGTTAATAATGTCATAAGGCATCGTTATTCCGCTTTATATTGGTAACTCAGCAGTGGT  
CATTGCCT

CGATCTAAATAATGCATATAACCGTATCTTTTTTATATGAACCTAGTTTTGCTGTATAAGAGCCGAGAAAA  
AAATATAGGAAAATATAGGAAAATATGCAAAATAGAAACACGAATTTTTTTTTTTGTTAGAGAAAAAAGAG  
ATAAGCCC

ATGTCCGCTTCATATATATATACACATACTAATCAAACCTCTATGTATACATAGAATAAAAAAGAAGCACT  
ATATTTATTTTCATAAAAAAAAAAAAAAAAAAATAACAAAAAAGTGCAACATTTATCAAAAGCTCAGTGTGCGT  
TATGCTTC

GTGCATTGGCATTAGAGGCATCTCCGACAATCAGAAGAACACTTCTTGTTATTATAATTACCCATATATTT  
TTTTTTTTTTCAAATTGACTACTAGGAAAAAGTGACAATTTATAGTAAACTGGCTAGAAAAACCTACAAG  
AAAAACAA

ATAAATCGCTTGATTCTTTTTTCCCTTTTTCTCAATATTCGCAGGTTATTTTTCCCTTTATATATATACATT  
GTTTGTATCTTTTTTTGATTACCATACTTACTATTTTTATATTAGTCATATTAGATGTCACTTTTTATATTA  
TCTAAACA

GGTCTGTAAGTCCATTTTTTCATTTTTTCAAATTAATAGTTTTTTTCGGAATATAACATATACATTTTTTTAC  
ATACACATAAAATATTTCTCTCCCTTTTACGTTTCATCCGCAATCGATAAAATGCATTTTATATACATG  
AAATGGCG

CTCTTCGACTACTTTCTGCAAGTAAATCATTGGAAGTGCAGACAATATAATGACAAAAGACGATAAGTTAC  
TTCTATTAATTGAACTTTAAGTATTTGGCTTTTTATTTTTTTTTTTTTTCATTTTCTTACTCGCGCTTTTCTTT  
ATTAAGGG

TGGCTGTGTGACTAGCTATAGAAAGAAAAAATTTAAAAAAAAAAAAAAAAAATCAAGTAGTTCCTGCACTGC  
GACGTCCATTATAGCATTATAAATTGGTCCCTGATTTACGCATGCGATAAACTATTTTTAGCGCAGCCGCA  
TATTATCC

GACTTAATAAAACTAGCTCTTCAGAGGAAAAAGTGATTACCCTCGTACTTTTTCATTTTCATATATATATATA  
TATATATATATGTACCTATATATTCTTCTTATTATGGCTTTTCTAATTTCTTGAAGATTCTTTGACAGCTC  
CATCTTTC

CTCTGCTTTTTTCTATCTGTTTGTGTCATATCTATCTGTCTATTTATCTATATATATATTTTTTTATATA  
AAACTATAAAGAATTCTTGATGTATGCCCTTAGGTTGGGCAGCTTTTCAACCTTAGACTTGATGCTAACGC  
CGCTCTGT

ATGATCATATGATACACGGTCCAATGGATAAACATTTTTTATCAACACTATGATATATAAATATAATAGTT  
TTTTCGTATATATATTCCTTTTTTTGGTCAATTTTTGAAATTTTCGTAGAAAAGGGAGAGACAAAACACATT  
ATATCAAT

CATTATCAAGAAGCAAAATTTTAACTATGTATTTTTGACCTTATTTTTGTACTCCACTTTTTTTTTTTAGTT  
TTTTTTAGTTATTTTTTAATTTTGAAGTAACGGCGATGAGGTGAAGTTTTTTTTTAACTGAAAAAGAAGAT  
CGAATGCA

AACATTTTTTATCAACACTATGATATATAAATATAATAGTTTTTTCGTATATATATTCCTTTTTTTGGTCAA  
TTTTTGAATTTTCGTAGAAAAGGGAGAGACAAAACACATTATATCAATGAAAACGTACAAAAGTAGATA  
AAGTCAGT

CTTGATAATTCTGTGGGCGCTTTTTTTGTGACATATTAATAATTGCGAAATTGCAAACGAAAATATAAATAT  
ATATGAATGTTAATAAATAAATTATTTAATTGATGATTGAGGATGAAATACACTTTTATGATCTGTCCTTA  
CGCGTAAT

AACTAGCTCTTCAGAGGAAAAAGTGATTACCCTCGTACTTTTCATTTTCATATATATATATATATATATATA  
TGTACCTATATATTCCTTATTATGGCTTTTCTAATTCCTGCAAGATTCTTTCGACAGCTCCATCTTTCGT  
TTGGTGAA

AAATTAGGGACTTCAAAAATTCTAATTTAGCCTCGAAATTGAGAAATGAAATTAGATCATAAATTAACTCT  
AACAAAGGAGAATATATATACGTACATATATATATATATATATAAGTTATTGTAATTGAGAAAAAATA  
AACATCAT

TTAATAAATAAATTATTTAATTGATGATTGAGGATGAAATACACTTTTATGATCTGTCCTTACGCGTAATA  
ATTACAAGAAGGTGAGAAAATTGCCTTTTTTTGCTAATTTTTTTTTTTGGTACCATATTCAATAATTGAT  
GCTAAATT

TTTCCTTTTGTTTTTTTTTTTTTATATTTCAAAGTTAAACTCGCTTAGACTATGTCTATAATATAAAAAAA  
AAATAGCTCTATTCCGTTTCTTTTATTCTATTTGATATTTCCATCACACTTTCATCTTAATCACGGATGTA  
TACTGATA

AGTTTTCTGTGCCTAAAATAGCCCAACATTGTTGCCCTTTTTCTATCACGAGGTTACTGAGCCATTGCATGA  
ACGCGCGCGCCTCGGCGGCTTTTTTTTCTACTCTATAAAAGCGAAAAGCCAGAAGTTACTATCTCGAATAA  
AAAACCC

GACACATAAGAAACAGATTTTTTACGAATTGAAAAGGCAAAATTCAAAAATTAGGACTAGGCGATATAGA  
TTTGTATATAATTTTTATATAAAAGGAAATATGTACATCATTTTTCTTTCCTGTTAGGCGAGCTGTTTCAAGTT  
CTTTTTTT

TGAAAATATGGAAAGTACAAGTTTTTAGTTGAGAAGGGTTTAAAGAAAGTTTTGAAAATGATCTAAAAAAT  
ATAAAAGCAATCAAAGAAATAAAAGCTGGAAAAATGCGTAATAACCGAAGTGACTAAAATTTCTTTACGCG  
CAAATAA

AGCTTACCCGCTTCCCCACACATTTTGGTAGTATCTGTCCTCTTGTTATTGTTACTGTAATTGTGTATATA  
TGTTCTCGCGTGTGTCTTATTTACTTATTTAGTTATTATATATATGGGTCTGCAAGGTAGAGGCGCGCTT  
GTTCAACA

TAGCTCGGCTGCACCATTCTAAACGCGGGGGAGTTTCTTTTTTTTTTTTTTTTTCAGCCTTTTCTTCGTAAG  
CAAAGTATCCCACGTAAGGTTCTTATACTAACACATATGTACTGTAAAGGTAAAATTACTTCTATTTT  
TTCTACTG

GAATCTGAATTTATAGATCCCCCAAAAAAAAAAAGTACTCGCTTCTTTCCATGTCCGCTTCATATATATAT  
ACACATACTAATCAAACCTCTATGTATACATAGAATAAAAAAGAAGAACTATATTTATTTTCATAAAAAAAAA  
AAAAAAAA

ATTTTATACCATTCCCTACTGAAGTATGTAATTCAAAATATATATATGTATATGTATATGTACATATATATG  
TATATACTATCTTAAACAACCTTTAACCTTCCGAGCTATTGATTTTTTGATCCTCACTTCAGCGGCTAAAAAA  
AAAAAAAA

CCCAACATTGTTGCCCTTTTTCTATCACGAGGTTACTGAGCCATTGCATGAACGCGCGCGCCTCGGCGGCT  
TTTTTTTTCTACTCTATAAAAGCGAAAAGCCAGAAGTTACTATCTCGAATAAAAAACCCCTCGAACTGCCAT  
CTCATTAC

CATAACAAATTTGCATATTACTTACGGCTTCAAAAAAGCACCGAACTAATCGAGAAAGCTTATAATATCG  
GTATACATTTGAATGTATTTTAACTATTTCTATATCAAAAAAAAAAAAAAAAAAATTGTATATTTTTTCGTTAT  
TCTCTAAT

TGCAAACGAAAATATAAATATATATGAATGTTAATAAATAAATTATTTAATTGATGATTGAGGATGAAATA  
CACTTTTATGATCTGTCTTACGCGTAATAATTACAAGAAGGTGAGAAAATTGCCTTTTTTTTGCTAATTTT  
TTTTTTTT

TACGGTGTTTTTTATGATCCCAGATGTTCAAAAAAATCAATAATTATCAATTAATCGTGTACTTTAATAAT  
CCATATATGAATCATTTAGGTAATTAGCTCTTTTTTGCTTGAAAAATTCATCCATTCGGCTCGCGTTGTCT  
AAAAAAAA

ACTGTAAGCACACAGAGCTATGGGATGTGTGGCAATGACTGTATATATATGTATATATATATATATATATA  
TATATATATTTATTTATTTATTTATTTAAAAATATAGCTACGTATGCGCCAGTTGTTTTTATCAGCTTTGCT  
TCTGGCCA

TTTTTAATGAACTGTAAGCACACAGAGCTATGGGATGTGTGGCAATGACTGTATATATATGTATATATATA  
TATATATATATATATATATATTTATTTATTTATTTATTTAAAAATATAGCTACGTATGCGCCAGTTGTTTTTAT  
CAGCTTTG

ATATTTTTTTGTTTTTAATGAACTGTAAGCACACAGAGCTATGGGATGTGTGGCAATGACTGTATATATATG  
TATATATATATATATATATATATATATATTTATTTATTTATTTATTTATTTAAAAATATAGCTACGTATGCGCCAG  
TTGTTTTT

CACAGAGCTATGGGATGTGTGGCAATGACTGTATATATATGTATATATATATATATATATATATATATATT  
TATTTATTTATTTATTTAAAAATATAGCTACGTATGCGCCAGTTGTTTTTATCAGCTTTGCTTCTGGCCACA  
TTTCAACC

AATACAAAGGAGAGTAAAGATGTGAAAATGAATTA AAAAGGAAAAGTATTATGCATATATATATATATATAT  
ATATATATATATTTATATATTTTATACACATAGAATTATTTTACAGTAAAGGATGCTACACCACCCCGGGCT  
AACTTTAT

ATACAATACATGTCATTTTTTAACAATGATGCAAATAACTTTTTAAGGCCTTAACACTCTACATAATATGCTA  
AAAACATTA AAAAAAAAAAAAAAGGAAAATAAAAAAAAAAAAAAAAAAAAAAAAAAAAAACGGGAGATTAACCGAATAGC  
AAACTCTT

CCGAACTCTTATACAATACATGTCATTTTTTAACAATGATGCAAATAACTTTTTAAGGCCTTAACACTCTACA  
TAATATGCTAAAAACATTA AAAAAAAAAAAAAAGGAAAATAAAAAAAAAAAAAAAAAAAAAAAAAAAAAACGGGAGATTA  
ACCGAATA

TGTCATTTTTTAACAATGATGCAAATAACTTTTTAAGGCCTTAACACTCTACATAATATGCTAAAAACATTAA  
AAAAAAAAAAAAAGGAAAATAAAAAAAAAAAAAAAAAAAAAAAAAAAAAACGGGAGATTAACCGAATAGCAAACCTTAA  
ACTATGAA







AAATTGCTTTGGATGACCAGATCCAAAACAGACATAAGCATTTCGTATAATTGGTACATAGGTATATATCAA  
ATAAAAATATGCATTATTCTAAAAAAAAAAAAAAAAAAAAAAAAAAAAAAAAAATCAAAAATGTCTCTCTAAAG  
GGTGATTA

CTTTTTTTATTGTACTCCAGTATGGACCTCTTAGGTGAGTGATCTTATTAATAAAAAAAAAAAAAAAAAATAAAA  
AAATATGAAAAAAAAAAGAAAATTAAAAACATAACAAATTTTATGACAGGAATAAAAACATAAAAAAAAAATGAA  
AAGCAAAA

TCGCGACTCGATAACGACGTGAGAAACGATTTTTTTTTCTTTTTACCCTATTTTTGTGCGTCCTTTTTTC  
AATTATAGCTTTTTTTTTTATTTTTTTTTTTTTCTCGTACTGTTTCACTGACAAAAGTTTTTTTTTCAAGAAA  
AATTTTCG

CTTCTATTATTTCTTTTTTTTTCTTTTTGTTTGTAATTGTTTTTATTTTTTTTTTTTTGCGCGAAACTTTGC  
TATATTGGGTAACGCGTAAAATACTTTTTATTATTGCAGTAAGGCGGAAGGGTCTTCCCCTTGCATGTTA  
AATAGCAT

TTTCATTATATAACCTCTATATTACATCAAAAAGATGGAAAAATATAAAAAAATTAATAAAAAAAAAAAGAA  
ATTTTTTCCAAAAGAGTATATTTATATGTATGTATAACATGTAGGGAAAATAAGAACTTTATTAATAGTAA  
AAAAGCAT

CGATAATATGTTTCTGAACCTCGCATTTTTTTTAATGATTTTTTATGACCTCTTATATATTCTTTTCATTATAT  
AACCTCTATATTACATCAAAAAGATGGAAAAATATAAAAAAATTAATAAAAAAAAAAAGAAATTTTTTCAA  
AAGAGTAT

AAAAAATTGAAAAATCATAAATTAATAAAAAAAAAAATCAATTGAATTTTTTTTTTTCATGATTACGTTTT  
GACATTTTTCTTTTTTTTTCTTATTACGATTTACCTTTTTTATTTATTTTTTTTCATTTTAGTATTTTA  
TTCTTCGT

GCTGATATGTTTATTTACATCACAGTGCCCTTATGATCAGGAACTGTTTAAAAACTTTTTTTTTTTTTTTTT  
TTTTTTTTTAAAATCTAAATATGTTGCTTGAATTATAAATACAATAACGGGAAAACATATGATGTGTCAT  
GTTCAAAA

ATAACGACGTGAGAAACGATTTTTTTTTCTTTTTACCCTATTTTTGTGCGTCCTTTTTCAATTATAGCT  
TTTTTTTTTATTTTTTTTTTTTTCTCGTACTGTTTCACTGACAAAAGTTTTTTTTTCAAGAAAATTTTCGAT  
GCCGCGTT

GTCATCTGAGAAATTGCTTTGGATGACCAGATCCAAAACAGACATAAGCATTTCGTATAATTGGTACATAGG  
TATATATCAAAATAAAAATATGCATTATTCTAAAAAAAAAAAAAAAAAAAAAAAAAAAAAAAAAATCAAAAATGT  
CTCTCTAA

AATACAAAAACTATTTTCTTTTCGGAAGGCAAAAACAAAAATTATAATAAAAAATAAAAATATGTATAATA  
TAATTTTTATCTTCTAACTTTTTATTTATTGAATTTTTTATATAGTAAATATAACACGTGATATATTTGAAA  
TGTGATTA

ACTACCATAAAAAAAAAATTGAAAAATCATAAATTAATAAAAAAAAAAATCAATTGAATTTTTTTTTTTCATG  
ATTACGTTTTGACATTTTTCTTTTTTTTTCTTATTACGATTTACCTTTTTTATTTATTTTTTTTCATTT  
TAGTATTT

TTAAGGCCTTAACACTCTACATAATATGCTAAAAACATTAATAAAAAAAAAAAGGAAAATAAAAAAAAAAAAA  
AAAAAAAAAACGGGAGATTAACCGAATAGCAAACCTTAAACTATGAAAAGGCAATCAATCCACTGTTTT  
CTTTTTCC

CACTTATTGAAGTCCACATAGATACACACAGATAAACATATATATATATTATGTATATATATATATATATA  
TATATATATATATATGTATATATCAACGCCATACCATTATCATTATCAATAAGTTTGCAGGGCGGGTACC  
CTCCCTCG



TGAACAAAAATAGTGTCTCCAGTAAGGCTTAAATGTATATTGATTTTCTATATATATATATATATATA  
TATATATTTATGAAATAAACCATATAATTATAAGTAGTAGCTTGGAAAAACGCCAAAGTTGTACTTGAAT  
GAGGTTTT

AATAAAAAATATGCATTATTCTAAAAAAAAAAAAAAAAAAAAAAAAAAAAAAAAATCAAAAATGTCTCTCTAAA  
GGGTGATTATAAAAAACTTGGTTTGGGCAAGTTTTTAGCCTCCCTTGGACCATTAGTGGCGAAAGTGGAGC  
CTGCATAA

TAACCTCTATATTACATCAAAAAGATGGAAAAATATAAAAAAATTAAAAAAAAAAAAAAAAAAGAAATTTTTTCCA  
AAAGAGTATATTTATATGTATGTATACATGTAGGGAAAATAAGAACTTTATTAATAGTAAAAAGCATAT  
ATACTTTA

CGCATTTTTTTAATGATTTTTTATGACCTCTTATATATTCTTTTCATTATATAACCTCTATATTACATCAAA  
AGATGGAAAAATATAAAAAAATTAAAAAAAAAAAAAAAAAAGAAATTTTTTCCAAAAGAGTATATTTATATGTAT  
GTATACAT

TAAGTTCTTTTAAGTATCACATTACAATAACAAAAGTCAACTACCATAAAAAAAAAATTGAAAAATCATAA  
ATTAAAAAAAAAAAAAATCAATTGAATTTTTTTTTTTCATGATTACGTTTTGACATTTTTCTTTTTTTTTCT  
TCTTATTA

ATTACGTAAACGATAATATGTTTCTGAACTCGCATTTTTTTAATGATTTTTTATGACCTCTTATATATTCT  
TTCATTATATAACCTCTATATTACATCAAAAAGATGGAAAAATATAAAAAAATTAAAAAAAAAAAAAAAAAAGAA  
TTTTTTCC

ATTACATCAAAAAGATGGAAAAATATAAAAAAATTAAAAAAAAAAAAAAAAAAGAAATTTTTTCCAAAAGAGTATA  
TTTATATGTATGTATACATGTAGGGAAAATAAGAACTTTATTAATAGTAAAAAGCATATATACTTTATT  
ATTAACTC

TTTCTGACGGCATCGAAGAGCCGAACTCTTATACAATACATGTCATTTTTAACAATGATGCAAATAACTTT  
TAAGGCCTTAACACTCTACATAATATGCTAAAAACATTAAAAAAAAAAAAAAAAAAGGAAAATAAAAAAAAAAAA  
AAAAAAA

CGGTTTCCATATTGGAACGGCACCTTCCTTTTTTGGAAGTCACGTTTCTGCAGCGCGTTTTCTTTTTTTTTT  
TTTTTTTTTTTTTTTTTTTTCGGTTTTTTTTCGCACGTTTCTTTTTTGGTGAGCGAGAAAGCTCGTTGCCTCC  
TAATATAA

TTATATATTCTTTTCATTATATAACCTCTATATTACATCAAAAAGATGGAAAAATATAAAAAAATTAAAAAA  
AAAAAAGAAATTTTTTCCAAAAGAGTATATTTATATGTATGTATACATGTAGGGAAAATAAGAACTTTA  
TTAATAGT

ATTGGAACGGCACCTTCCTTTTTTGGAAGTCACGTTTCTGCAGCGCGTTTTCTTTTTTTTTTTTTTTTTT  
TTTTTTTTTTTTTTTTTTTTCGGTTTTTTTTCGCACGTTTCTTTTTTGGTGAGCGAGAAAGCTCGTTGCCTCCTAATATAAAG  
GATGAGAT

GTATATATCAAATAAAAAATATGCATTATTCTAAAAAAAAAAAAAAAAAAAAAAAAAAAAAAAAATCAAAAATG  
TCTCTCTAAAGGGTATTATAAAAAACTTGGTTTGGGCAAGTTTTTAGCCTCCCTTGGACCATTAGTGGCG  
AAAGTGGA

ACTATTTTCTTTTCGGAAGGCAAAAACAAAAATTATAATAAAAAATAAAAAATATGTATAATATAATTTTTAT  
CTTCTAACTTTTTATTATTGAATTTTTATATAGTAAATATAACACGTGATATATTTGAAATGTGATTATA  
TTATATAT

CTATCCCTCGGATTATAGACTGTGAATATTGCATATGCAACTTTGACTCAAATTTTTCCAAAATTTGATAT  
ATATATATATATATATATGTTTGTATGTATATATATATATACGTATATATATCATATATACGAAAAGTAGA  
AAAAAAA

TCTTTAACTGGAAAAAAAAAGCTTTCACGACTCAAAGAAAAAAAAAAAAAAAAATTTTTTTAGGGTAAAAAAAAAA  
CTAAGGGCTAATATGAAAAATACAAAGTTATGTTACTTTAAAATGAGGTTTGAAGAAGGAGAAAGACAA  
AAAAGCAG

TGAAAAAAGTTCATGTTTTGTTATTTCTTTCTCACATACTTTATAAAAAAGATAATTTTTTTAAAAAAA  
AAAAAATACAAGTGAACATTATCAAATAAAAAGCATTATAGCGCCACATGCGATGAACCTGAGCTTTTA  
TCTTCATT

TTAGAGCATAAGAAAAAATGTGAACAAAAATAGTGTCTCCAGTAAGGCTTAAATGTATATTGATTTTC  
TATATATATATATATATATATATATATATATATATATATATATATATATATATATATATATATATAT  
GCCAAAGT

ATTACAATAACAAAACCTGCAACTACCATAAAAAAAATTTGAAAAATCATAAATTAATAAAAAAATCAA  
TTGAATTTTTTTTTTTCATGATTACGTTTTGACATTTTTCTTTTTTTTTCTCTTATTACGATTTACCTTT  
TTTATTTA

TAATGATTTTTTATGACCTCTTATATATTCTTTTATTATATAACCTCTATATTACATCAAAGATGGAAAA  
ATATAAAAAAATTAATAAAAAAAGAAATTTTTTCCAAAAGAGTATATTTATATGTATGTATACATGT  
AGGGAAAA

AGTCCACATAGATACACACAGATAAACATATATATATATATATATATATATATATATATATATATATA  
TATATGTATATATCAACGCCCATACCATTATCATTATCAATAAGTTTGCAGGGCGGTACCCTCCCTCGTG  
CTATTATA

TGAGTGCCTGCGGTTTTCCATATTGGAACGGCACCTTCCTTTTTTGGAAAGTCACGTTCTGCAGCGGTTTC  
TTTTTTTTTTTTTTTTTTTTTTTTTTTTTTTTTTTTTTTTTTCGGTTTTTTTTTCGCACGTTTCTTTTTGGT  
GAGCGAGAAAGCT  
CGTTGCCT

GAAGTGTAAAAACTTTTTTTTTTTTTTTTTTTTTTTTTTTTTTTTTTTTTTTTTTAAATCTAAATATGTTGCTT  
GAATTATAAA  
TACAATAACGGGAAAACATATGATGTGTGTCATGTTCAAAAAGCTTTGAATAGGTGTCTTCCATCAAAGGGT  
CACAGGAA

TTTTTTATTCTTTCACAGCGTTTTTTTCGACGGAGGAGGGAAAAAATAATTTGATTTAAGGCATCAAATGC  
GCGACATCATATACCTTTGTCCGCTGTTATCATACCTTGAACCTCTACATTTAGCCTAGCGCGCGCAAAA  
AGAAAAAA

TTACCCGTCCTGCACAATCATGAGTGCCTGCGGTTTTCCATATTGGAACGGCACCTTCCTTTTTTGGAAAGTC  
ACGTTCTGCAGCGGTTTTTTTTTTTTTTTTTTTTTTTTTTTTTTTTTTTTTTTTTTCGGTTTTTTTTTCGCACG  
TTTCT  
TTTTGGTG

CACCTTCCTTTTTTGGAAAGTCACGTTCTGCAGCGGTTTTTTTTTTTTTTTTTTTTTTTTTTTTTTTTTTTT  
TTTTTTTTTTTTTTTTTTTTTTTTTTTTTTTTTTTTTTTTTTCGGTTTTTTTTGGTGGAGCGAGAAAGCTCGTT  
GCCTCCTAATATAAAGGATGAGATGA  
GATGAGCA

TTTTGGAAAGCTAAGGATAAAAAACAATTCTTTTATTAGATGTATTTTTTTCATCGTATTAGGTGTAATATA  
TATATATATGTATATATATATATATATATAATATATATATGTAGTATACACACGTGGACGACCATTAACGAAT  
GTTGTATA

AAAATCGATGGGCTGGGAAAACGCGTCATCAATTCAACCGAATAAGGAAAATAAGCCACTTCACGCGGTT  
CGCGATATTTGTCCAGCCTTTTTTCCGAAAAAAAAAATAAATAAATAAATGAAACGGACAGGAATTG  
AACCTGCA

CGTCAAGTGAGAAGAGTTTTGGCCTTCGCTTCAGTTAGATCTTCTATTATTTCTTTTTTTTTTTTTTTTT  
TTTTTTTTTTTTTTTTTTTTTTTTTTTTTTTTTTTTTTTTTTCGGTTTTTTTTGGTGGAGCGAGAAAGCTCGTT  
GCCTCCTAATATAAAGGATGAGATGA  
GATGAGCA

TTCCTTTTTTTTCTTTTTGTTTGTAAATTGTTTTTATTTTTTTTTTTTGC GCGAAACTTTGCTATATTGGGT  
AACGCGTAAAATACTTTTTATTATTGCAGTAAGGCGGAAGGGTCTTCCCCTTGCATGTTAAATAGCATA  
ATGGCACC

AGTCGCCAAAAAATCGATGGGCTGGGAAAACGCGTCATCAATTCAACCGAATAAGGAAAACTAAGCCACT  
TCACGCGTTTCGCGATATTTGTCCAGCCTCTTTTTCCGAAAAAAAAAAAAATTAATAATAAAATGAAACGG  
ACAGGAAT

ACCTTAAGTTTTAGTAGGCAGGACAATTTCAAGTGTGTGTAATAATATATTTATATTTATATATTTAAATAT  
ACTAAATAAAAAATAACTATCATCGTTGTGATGCAAAAAAAAAAAAAATGAACAGAAAATAATAGTGAT  
GTGAATGG

ATAATATGCTAAAAACATTAATAAAAAAAAAAAGGAAAATAAAAAAAAAAAAAAAAAAAAAACGGGAGATT  
AACCGAATAGCAAACCTTAAACTATGAAAAGGCAATCAATCCACTGTTTTCTTTTTCCATTTCTTCTAGC  
CTATTTGA

AGAAGGCGATCACTTATTGAAGTCCACATAGATACACACAGATAAACATATATATATATTATGTATATATATA  
TATATATATATATATATATATATATATATATATATATATATATATATATATATATATATATATATATATAT  
GGCGGGTA

TTATTAGTTACTTTTTTTTATTGTACTCCAGTATGGACCTCTTAGGTGAGTGATCTTATTAATAAAAAATAAA  
AAAAATAAAAAATATGAAAAAAAAAAGAAAATTAAAAACTAAACAAATTTTATGACAGGAATAAAAACTAT  
AAAAATG

GCAGACATGACCCTTTTCTCGATATGTTTTTCTGTGATTTTTTTTTTTCAATTGTTGAAATAACCTGTAT  
TGTTCAACTACTGGACAATTGTTCTGATATATATATATATATATAATTTTCAATGAAAAAAAAAAAAAAG  
AAAGAAA

GGCCTTCGCTTCAGTTAGATCTTCTATTATTTCTTTTTTTTTCTTTTTGTTTGTAAATTGTTTTTATTTTT  
TTTTTTGC GCGAAACTTTGCTATATTGGGTAACGCGTAAAATACTTTTTATTATTGCAGTAAGGCGGAAGG  
GTCTTCCC

TAGTGTCACTCCAGTAAGGCTTAAATGTATATTGATTTTCTATATATATATATATATATATATATATATTTA  
TGAAATAAACCATATAATTATAAGTAGTAGCTTGGAAAACGCCAAAGTTGACTTAGAATGAGGTTTTAA  
AAAAAAT

ACCCACTTGTTTTACCGCAGAGGGCCCTTTTTTTGTTTACCGTCGCAAAAAAAAAACGCGAAGAATACGCG  
TTGGTCGTTAAATTTGTGGTACGCGTAAAACGCTATTTGGTATCCTCTTTAGGGACGCGCCATTGTCT  
ATACGGTA

TATTGAATAGTGATGTTATGACCTTTTTTTTTACGCCTTTTTTTTTTTTTTTTTTTTTTTTTAATTTATCTC  
ACTTTTCCCTTCTATTTTATGTACTAACAGATAATTTTATAATGATTTTCATGTATTTTTTGGTTCAGAATTT  
TGACAAGG

TGCATTATTCTAAAAAAAAAAAAAAAAAAAAAAAAAAAAAAAAATCAAAAATGTCTCTCTAAAGGGTGATTAT  
AAAAAATTTGGTTTGGGCAAGTTTTTAGCCTCCCTTGGACCATTAGTGGCGAAAGTGGAGCCTGCATAAGA  
GTGACTGA

TAATTTCCGTAATACAAAAACTATTTTCTTTTCGGAAGGCAAAAACAAAAATTAATAATAAAAAATAAAAA  
ATGTATAATATAATTTTTATCTTCTAACTTTTTATTTATTGAATTTTTATATAGTAAATATAACACGTGAT  
ATATTTGA

CATCACTTTTCTATACTTTCTCTTCCCCGCGTGTTCCTGACACCAACAATATATGCCATAATACACGTA  
ACATTTTTTTATAAAAAGAAAAGGTAAGTGATATATATAAAATAGCGCCATGAGTAGGAAACTTTTCTGTT  
ACTGCAGA

AAAAAATCAATTGAATTTTTTTTTTTCATGATTACGTTTTGACATTTTTCTTTTTTTTTCTCTTATTAC  
GATTTACCTTTTTTATTTATTTTTTTTCATTTTAGTATTTTATTCTTCGTTATTTATGTATAGAAATTTTCA  
TTTTCATT

TTATGACCTCTTATATATTCTTTTCATTATATAACCTCTATATTACATCAAAAGATGGAAAAATATAAAAA  
ATTAATAAAAAAAAAAAAAAGAAATTTTTTCCAAAAGAGTATATTTATATGTATGTATACATGTAGGGAAATA  
AGAAACTT

AATACAATTTTTTTTTTATTCTTCACAGCGTTTTTTTCGACGGAGGAGGGAAAAAATAATTGTATTTAAGG  
CATCAATGCGCGACATCATATACCTTTGTCCGCTGTTATCATACCTTGAACCTCTACATTTTCAGCCTAGC  
GCGCGCAA

TTTTTGGGCTACATTATTCTTGAAAAAGTTCATGTTTTGTTATTTCTTTCTCACATACTTTATAAAAA  
GATAATTTTTTTAAAAAATAACAAGTGAACATTATCAAATAAAAAGCATTATAGCGCCACAT  
GCGATGAA

AATTAAGGAAAAGTATTATGCATATATATATATATATATATATATATATATATATATTTTTATATATTTATACACAT  
AGAATTATTTTACAGTAAAGGATGCTACACCACCCGGGCTAACTTTATGGCTTCTACTATTTTCAGGTTCC  
CTTTTCGCG

TTTCATTTTCGGTAGTGAGATGGCAGTTCGAGGGGTTTTTTATTCAAATAATAACTTCTGGCTTTTTCGCT  
TTTATATAGCAGAAAAAAGCCGTCGAGGCGCGCGGTTTCATGCAATGGCTCAGTAACCTCGGGATAGAA  
AAAGGGCA

TTTACCGCAGAGGGCCCTTTTTTTGTTTACCGTCGCAAAAAAACGCGAAGAATACGCGTTGGTCGTTA  
AATTTTGTGGTACGCGTAAACTGCTATTTGGTATCCTCTTTAGGGACGCGCCATTGTCTATACGGTAAT  
ATAGGGCT

TCGGCTATTACGTCAAGTGAGAAGAGTTTTGGCCTTCGCTTCAGTTAGATCTTCTATTATTTCTTTTTTT  
TCTTTTTGTTTGAATTGTTTTTTATTTTTTTTTTTTGCGCGAACTTTGCTATATTGGGTAACGCGTAAAA  
TACTTTTT

AATGATTAATGCTGATATGTTTATTTACATCACAGTGCCCTTATGATCAGGAAGTGTAAACTTTTTTT  
TTTTTTTTTTTTTTTTTTTTTAAAATCTAAATATGTTGCTTGAATTATAAATACAATAACGGGAAAACATAT  
GATGTGTC

TTTTTACCCTATTTTTGTGCGTCCTTTTTCAATTATAGCTTTTTTTTTTTTTTTTTTTTTCTCGTACTG  
TTTCACTGACAAAAGTTTTTTTTTCAAGAAAAATTTTCGATGCCGCTTCTCTGTGTGCAACGGATGGATG  
GTAGATGG

CTTTGACTCAAATTTTTCCAAAATTTGATATATATATATATATATATATATATGTTTGTATGTATATATATAT  
ACGTATATATATCATATATACGAAAAGTAGAAAAAAGGTGATATTTTCGCTCGTGAAAAGCTAATGCC  
ACAGCTTG

TAGTTTTTTTTTTTTTTTTTTTTTTTTTTTTTTTATTTTGTATGGCATACTAACTATACAAATATTTATATGTACATTTAT  
ACAGTAACCTATTATTTACCGATATTCACCGGTATTTTACTTTAATAGATGCTGGTAATAACGAAAAAAT  
TGATAACT

GAAAATAGGAAAAAATTTGTCATCTGAGAAATTGCTTTGGATGACCAGATCCAAAACAGACATAAGCAT  
TCGTATAATTGGTACATAGGTATATATCAAATAAAAATATGCATTATTCTAAAAAATAAAAAAAAAAAAA  
AAAAAAA

GGCTGGGAAAACGCGTCATCAATTCACCGAATAAGGAAAACTAAGCCACTTCACGCGGTTTCGCGATATTT  
GTCCAGCCTCTTTTTCCGAAAAAATAAATAATAAAAATGAAACGGACAGGAATTGAACCTGCAAC  
CCTTCGAT

ATCAAATTTGACCTTAAGTTTTAGTAGGCAGGACAATTTTCAGTGTTTGTAAAAATATATTTATATTTATAT  
ATTTAAATATACTAAATAAAAAATAATACTATCATCGTTGTGATGCAAAAAAAAAAAAAAAAAATGAACAGAAAA  
TAATAGTG

CATTTTTCTGTAATTTCCGTAATACAAAAACTATTTTCTTTTCGGAAGGCAAAAAACAAAAATTATAATAA  
AAATAAAAAATATGTATAATATAATTTTTATCTTCTAACTTTTTATTATTGAATTTTTATATAGTAAATAT  
AACACGTG

TTCACAGCGTTTTTTTCGACGGAGGAGGGAAAAAAAAAAATTGTATTTAAGGCATCAAATGCGCGACATCAT  
ATACCTTTGTCCGCTGTTATCATACCTTGAACCTCTACATTTTCAGCCTAGCGCGCGCAAAAAGAAAAAAAA  
ATCATAAG

AAATAAAAGAAAATCGACATAATGCACCTCAGTATAAATTGTAAAATATAACATAAATCAAAGAAAAACGA  
GAAAACGATATGATTATCCGATACCGACAAATTCTCATGTTATTTTTTTTTTTTTTTTTTTTTTTTTTTT  
ATTTTTCT

CCTGGGTTATCTGCGGGAGTGAACAATGATAATACAAAGGAGAGTAAAGATGTGAAAATGAATTTAAAAGGA  
AAAGTATTATGCATATATATATATATATATATATATATATATATATATATATATATATATATATATATAT  
ACAGTAAA

TGATGTTATGACCTTTTTTTTTTACGCCTTTTTTTTTTTTTTTTTTTTTTTTTTTAATTTATCTCACTTTTCCCT  
TCTATTTTATGTACTAACAGATAATTTTATAATGATTTTCATGTATTTTTGGTTGAGAATTTTGACAAGGCA  
ACTCTTGA

AAAAGAAGACTAACTAAGAGAAGAAACATACTTCAAAAAAAAAAAAAAAAAAGAAAAACAACAAAAAACGTATA  
AAATGAAATAAATTTGAAACCGCTTTTTTTCCTTTTTTTTTTTTTTTACTTTGTTTGACCTCCCCTAACTCT  
TTCTTTTT

CCATCGAAATAGTCGCCAAAAAATCGATGGGCTGGGAAAACGCGTCATCAATTC AACCGAATAAGGAAAA  
CTAAGCCACTTCACGCGGTTTCGCGATATTTGTCCAGCCTTTTTTCCGAAAAAAAAAAAAATTAATAATAA  
AATGAAAC

TGACGAAAGAAGACACGTGCGCTAAACGCGTAATGAATCGCAATATACGAAAAGCTAAACGGGTTTTTTCAG  
AATCCTCTTACCCAGCCTTGATAATAGTTTTGGCCGAAAAAAAAAAAAAGAAAGAAAAAATTGAAATTT  
CGCGATCC

CCTGTGGTAGACCCACTTGTTTTACCGCAGAGGGCCCTTTTTTTGTTTACCGTCGCAAAAAAAAAAACGCGA  
AGAATACGCGTTGGTCGTTAAATTTGTGGTACGCGTAAACTGCTATTTGGTATCCTCTTTAGGGACGCG  
CCCATTGT

TGAATTGGATATCAAATTTGACCTTAAGTTTTAGTAGGCAGGACAATTTTCAGTGTTTGTAAAAATATATTT  
ATATTTATATATTTAAATATACTAAATAAAAAATAATACTATCATCGTTGTGATGCAAAAAAAAAAAAAAAAA  
GAACAGAA

ATACCAAGCTTTTTGGAAAGCTAAGGATAAAAAACAATTCCTTTTCATTAGATGTATTTTTTTCATCGTATTAG  
GTGTAATATATATATATATATATATATATATATATATATAATATATATATATATATATATATATATATAT  
ATTAACGA

AGAAAAGAAAGGGCTAAAAACCTCGCCCCAGTGCATAATAAAAGTAAAAAAAAAAAAAATCAAACTTTATT  
GGGATAAAATAAAAAATCAGAAAAACCTTATATATGTATATGTAGTTAAATGAAGCCAGTTTTTTTTCGTCT  
GGTTTTGTT

GAAGAGTTTTGGCCTTCGCTTCAGTTAGATCTTCTATTATTTCTTTTTTTTTCTTTTTGTTTGTAAATTGTT  
TTTTATTTTTTTTTTTGCGCGAAACTTTGCTATATTGGGTAACGCGTAAATACTTTTTATTATTGCAGTA  
AGGCGGAA



TAAGTATCACATTACAATAACAAAACCTGCAACTACCATAAAAAAAAAAATTGAAAAATCATAAATTA  
AAAAAATCAATTGAATTTTTTTTTTTTCATGATTACGTTTTGACATTTTCTTTTTTTTTCTCTTATTACG  
ATTTACCT

TGCACAATCATGAGTGCCTGCGGTTCCATATTGGAACGGCACCTTCTTTTTTTGGAAGTCACGTTCTGC  
AGCGGTTTTCTTTTTTTTTTTTTTTTTTTTTTTTTTTTATTTTTCGGTTTTTTTCGCACGTTTTCTTTTTGGTGAG  
CGAGAAAG

GGGATGATCATATGATGGGCGCTATCCTCATCGCGACTCGATAACGACGTGAGAAACGATTTTTTTTTTCT  
TTTTACCATTATTTTTGTGCGTCTTTTTCAATTATAGCTTTTTTTTTTTTTTTTTTTTTCTCGTACTGT  
TTCCTGA

ACGAAACTGGTAAGTTCTTTTAAGTATCACATTACAATAACAAAACCTGCAACTACCATAAAAAAAAAAATTGA  
AAAATCATAAATTA  
AAAAAATCAATTGAATTTTTTTTTTTTCATGATTACGTTTTGACATTTTCT  
TTTTTTTT

CAAAATTAACATTTTTCTGTAATTTCCGTAATACAAAAACTATTTTTCTTTTCGGAAGGCAAAAACAAA  
ATTATAATAAAAAATAAAATATGTATAATATAATTTTTATCTTCTAACTTTTTATTTATTGAATTTTTATA  
TAGTAAAT

CTGAAAACGCCATCGAAATAGTCGCCAAAAAATCGATGGGCTGGGAAAACGCGTCATCAATTCACCGA  
ATAAGGAAAACCTAAGCCACTTCACGCGGTTTCGCGATATTTGTCCAGCCTCTTTTTCCGAAAAAAAAA  
TAAATAAT

GTCATGCTCACCTTAAGTTCTCAACCTTTTAGTTTTTTTTTTTTTTTTTTTTTTTTTTTTTTATTTTGTATGGCATACT  
AACTATACAAATATTTATATGTACATTTATACAGTAACCTATTATTTACCGATATTCACCGGATTTTTACT  
TTAATAGA

TGAAAAAAAAAAGCTCAGTCGCGCGTGGCCTTTCTCTATGGAGATTTCTCAAACGATATTAATCCTGTA  
TATCTCTATTAATTTAGTTAATACATACAGATATATCGTCGCTTTTATTTTTTTTTTTTTCAAATACTTCTT  
CTTCCTAA

TTGACACCGCGCGCAAATGTTAGAAGTTCAAATGAAGCCTAAGTATCAGCCTAATTGAAGTTTTTTTTTTG  
ATCACTCCAATAGGCAAATCTATAGATATATAAAAAATATAGACAAGACTTTTTTTTTTACATTGCCAGTTTT  
CTTTTTTC

GAATGAAGAAGAGAGCTGAAAACAATGCTCAAAGAAGACTAACTAAGAGAAGAAACATACTTCAAAAAA  
AAAAAAGAAAAACAACAAAAAACGTATAAAATGAAATAAATTCGAACCGCTTTTTTTCTTTTTTTTT  
TTTTTACT

TTTTGGAAGTCACGTTCTGCAGCGGTTTTCTTTTTTTTTTTTTTTTTTTTTTTTTTTTTTTTTTTTTTTTT  
CGCACGTTTTCTTTTTGGTGAGCGAGAAAGCTCGTTGCCTCCTAATATAAAGGATGAGATGAGATGAGCAGT  
GCCGCAA

TTTCGGAAGGCAAAAACAAAAATTATAATAAAAAATAAAAAATATGTATAATATAATTTTTATCTTCTAACTT  
TTTATTTATTGAATTTTTATATAGTAAATATAACACGTGATATATTTGAAATGTGATTATATTATATATAT  
TGATGTTT

GAGAGCCAAGTCTTTCTTTATAATGCATAGCAATAAATAGTCATATATATATATATATATATATATATATG  
TACATATATATGAACATATATATGAACAAATAAATGATAATGGTATGTGATAGTCATTATTAACGATTAAG  
CGTTTTTC

CACGTTCTGCAGCGGTTTTCTTTTTTTTTTTTTTTTTTTTTTTTTTTTTTTTTTTTTTTTTTTTTTTTT  
TTTTGGTGAGCGAGAAAGCTCGTTGCCTCCTAATATAAAGGATGAGATGAGATGAGCAGTCCCGAAATG  
AGGGATGT

TAACGCACTGATTACGTAAACGATAATATGTTCCCTGAACTCGCATTNTTTTTAATGATTTTTTATGACCTCT  
TATATATTCTTTTCATTATATAACCTCTATATTACATCAAAAGATGGAAAAATATAAAAAAATTAAAAAA  
AAAAAGA

GAAAAAAAAGCTTTTCACGACTCAAAGAAAAAATTTTTTAGGGTAAAAAACTAAGGGCTA  
ATATGAAAAATACAAAGTTATGTTACTTTAAAATGAGGTTTGGAAAGAAGGAGAAAGACAAAAAGCAGGG  
CACATGTC

CGCGCATAACATGCGTATTCATATTTCCCTTTTGCATTTGTCTTCTTCGGTTTTCTGGTAGAATTTCCCTT  
AATGGGAGAGTAGTAACAATGCAAAAAATGAAGAAAATTGAGAAAAACAAAAAGAAAAA  
AAAAA

ATAACCTGTATTGTTCAACTGGACAATTGTTCTGATATATATATATATAATTTTTCAATGAAAAA  
AAAAAAGAAAGAAAATTAGAAGCTAGAAAGAAATAAGGAAAAGGAAAAGCAAACAACAATAGGAAAA  
AAAAGCAT

CTATACTTTCTCTTCCCCGCGTGTTCCTGACACCAACAATATATGCCATAATACACGTAACATTTTTTT  
ATAAAAAGAAAAGGTAAGTGATATATATAAAATAGCGCCATGAGTAGGAAACTTTTCTGTTACTGCAGATA  
TGTGCCAG

TTTTTTACTTTTGCCATCTTATACTCATCCTAATCATCTGTTTCATTTTCCTTCTATTTCTTTTTTTTT  
TTTTTTTTTTTTTTTTTTTTCAGTTTTTCGAAGAACTGCCTTTTTTGAATTTGTAAGACGAAGTGAAGTAT  
TCAGGAGT

ATCGGTTATAACTGCCGATACCCGTATCTTTTGTGTTTGATTCAAGGAATACTTATTTAGAGTAGAAAGAA  
TATATTTACTTAGATAAATAATGTATAATATATAAAAAAATCAAAAAACAGGAAAAAATCATG  
AGTGAGTG

ACATTATTCTTGAAAAAGTTCATGTTTTGTTATTTCTTTCTCACATACTTTATAAAAAAGATAATTTTT  
TTAAAAAATACAAAGTGAACATTATCAAATAAAAAGCATTATAGCGCCACATGCGATGAACC  
TGAGCTTT

GTACAAAGATAAATAAAAGAAAATCGACATAATGCACCTCAGTATAAATTGTAATAATAACATAAATCAA  
AGAAAAACGAGAAAACGATATGATTATCCGATACCGACAAATTCTCATGTTTATTTTTTTTTTTTTTTTT  
TTTTTTTT

GATATGTTTTCTGTGATTTTTTTTTTTCAATTGTTTCGAAATAACCTGTATTGTTCAACTGGACAATTG  
TTCTGATATATATATATATAATTTTTCAATGAAAAAAGAAAAGAAAATTAGAAGCTAGA  
AAGAAATA

TAACTAAGAGAAGAAACATACTTCAAAAAAAGAAAAACAACAAAAAACGTATAAATGAAATA  
AATTTGAAACCGCTTTTTTTCTTTTTTTTTTTTACTTTGTTTGACCTCCCCTAATCTTTCTTTTTAC  
CTTCACAA

CCTAAACGCGTAATGAATCGCAATATACGAAAAGCTAAACGGGTTTTTCAGAATCCTCTTACCCAGCCTTG  
GATAATAGTTTTGGCCGAAAAAAGAAAAGAAAATTTGAAATTTTCGCGATCCGAACAACAATG  
AACAGAAA

TCCAGTAAGGCTTAAATGTATATTGATTTTCTATATATATATATATATATATATATATTTTTATGAAATAAAC  
CATATAATTATAAGTAGTAGCTTGGAAAAACGCCAAAGTTGTAAGTGAATGAGGTTTTAAAAAATTA  
TAAAAA

GCCGAGGTATTTAGAGCATAAGAAAAATGTGAACAAAAATAGTGTCATCTCCAGTAAGGCTTAAATGTAT  
ATTGATTTCTATATATATATATATATATATATATATTTTTATGAAATAAACCATATAATTATAAGTAGTAG  
TTGAAAA



TAAATGTATATACTGATTGTTGAAAAAAAAAAAAAGCTCAGTCGCGCGTGGCCTTTCTCTATGGAGATTTCT  
CAAACGATATTAATCCTGTATATCTCTATTAATTTAGTTAATACATACAGATATATCGTCGCTTTTATTT  
TTTTTTTT

AAATTTACAGTCATGCTCACCCCTTAAGTTCTCAACCTTTTAGTTTTTTTTTTTTTTTTTTTTTTTTTTTATTTTGT  
ATGGCATACTAACTATACAAATATTTATATGTACATTTATACAGTAACCTATTATTTACCGATATTCACCG  
GTATTTTA

AAATCATGTGTTACCCGTCCTGCACAATCATGAGTGCCTGCGGTTTCCATATTGGAACGGCACCTTCCTTT  
TTTGAAGTCACGTTCCCTGCAGCGGTTTCTTTTTTTTTTTTTTTTTTTTTTTTTTTTTTTTATTTTTCGGTTTTTTTC  
GCACGTTT

AGATTTTTGCCTATAAAGTTTAAAATACTTCCCGCTATTTGTATATATGCATATCTTTATATTATGAAAG  
ATATTTTTTTTATTTACTTTTAGTCCGTATACTTTTATTTTGTGTTTGTAGACAATCTCGAAGAACAAAAA  
AAAAGATA

CATGATAACCAAAATAGTCTTAACAAAATACATATAAGTAAATAATGCTAAATAAAAAAGCAAAAAATA  
AAATTTATATCACACTTGTA AACCTTTAAATGATCTTCTTTTTTACCTGTTTTATTCACTTGTTTTTTTT  
TTTCTGAG

GGGCTAAAAACCTCGCCCCAGTGCATAATAAAGTAAAAAAAAAAAAATCAAACCTTTATTGGGATAAAAT  
AAAAATCAGAAAAACCTTATATATGTATATGTAGTTAAATGAAGCCAGTTTTTTTCGTCTGGTTTGTTC  
AGCCTATA

ATTCACAATAGGAAAAAAAAAATGGGTTTGGTGACTGCAGTAAAGACGTGCTAAAAAAAAAAAAAGTTGTTT  
TTATCTGAACCTTAAATATATCATTTATGAGTGTATATATTATACAAACGCAATAACAGTGGCTCCCGCCC  
TCCACCTC

CGTCGCAAAAAAAAAACGCGAAGAATACGCGTTGGTCGTTAAATTTTTGTGGTACGCGTAAACTGCTATTT  
GGTATCCTCTTTAGGGACGCGCCATTGTCTATACGGTAATATAGGGCTTTCTTCATTACCTGCTTGCGTC  
AATTAGCT

CAAAGGATGCTCCCGTTGTGTGATTGAAAACGGAAC TAAGCTTTACTAATCAACAATATTA ACTTTATAA  
TAGATTCATATATGCGGTACATATATTATATACAATTTTTCTACACAAGAATGCTTAATAAAGATACGAT  
AATTTTTT

ATGGCGCAAGTACTTATTGTGACCTTTGGGGTACCGTTACCGTCAGTTTTCTTCAGCTAAGGCGCGCGCGC  
CAGATAACTAAAAAAAAATATAGTTGCTGCTTAAAAACAATACACCCGTACTCTCTTGCCTGTAAAAACC  
TCGAAGGA

ACTGCCGATACCCGTATCTTTTGTGTTTGATTCAAGGAATACTTATTTAGAGTAGAAAAGAATATATTTACT  
TAGATAACTTAATGTATAATATATAAAAAAATCAAAAAACAGGAAAAAAAAAATCATGAGTGTGAGTGGC  
ACTTTTAA

CCCTTTTCTCGATATGTTTTTCTGTGATTTTTTTTTTTTCAATTGTTTCGAAATAACCTGTATTGTTCAATAC  
TGGACAATTGTTCTGATATATATATATATATAATTTTTCAATGAAAAAAAAAAAAAAAAAAGAAAGAAAATT  
AGAAGCTA

AAGTTTTTCATTTTGTGGGGTCTTTAACTGGAAAAAAAAAGCTTTTACGACTCAAAGAAAAAAAAAAAAAAT  
TTTTTTAGGGTAAAAAAAAACTAAGGGCTAATATGAAAAATACAAAGTTATGTTACTTTAAAATGAGGTT  
TGGAAGAA

CTAAGGATAAAAAACAATTCCTTTTCATTAGATGTATTTTTTTCATCGTATTAGGTGTAATATATATATATATG  
TATATATATATATATATAATATATATGTAGTATACACACGTGGACGACCATTAACGAATGTTGTATATG  
CTTATGCG

ATAACTAATTGTGTGCGTTGCGCGGGGTTGTGTGGCTCAAAAAGATCTGTTTTTGTATTAGCAATTTTTTA  
TTTCCCTTTTTAAATGAATTTTTTTCTTTCTGTTTCGAGACAAGGCCTTTTGCAAAAAAAAAAAGTAA  
AAAAGTGA

TATTCTACGAAAACGAGATGTATTGAATAGTGATGTTATGACCTTTTTTTTTACGCCTTTTTTTTTTTTT  
TTTTTTTTTTAATTTATCTCACTTTTCCCTTCTATTTTATGTACTAACAGATAATTTTATAATGATTTTCA  
GTATTTTT

ACATAAATCAAAGAAAAACGAGAAAACGATATGATTATCCGATACCGACAAATTCTCATGTTTATTTTTTT  
TTTTTTTTTTTTTTTTTTTTAATTTTTCTTGGGCCTTTACATTGAGTACAGGGCATAAGTGCGAGGAGTT  
ACCAGACG

CACTTATGCAAATGATTAATGCTGATATGTTTATTTACATCACAGTGCCCTTATGATCAGGAACTGTTTAA  
AAACTTTTTTTTTTTTTTTTTTTTTTTTTTTAAAATCTAAATATGTTGCTTGAATTATAAATACAATAACGG  
GAAAACAT

AAAACTTTTTTTTTTTTTTTTTTTTTTTTTTTTAAAATCTAAATATGTTGCTTGAATTATAAATACAATAACG  
GGAAAACATATGATGTGTCATGTTCAAAAAGCTTTGAATAGGTGTCTTCCATCAAAAAGGGTCACAGGAACA  
TGAATTTT

GTGTGCGTTGCGCGGGGTTGTGTGGCTCAAAAAGATCTGTTTTTGTATTAGCAATTTTTTATTTCCCTTTT  
TAAATGAATTTTTTTCTTTCTGTTTCGAGACAAGGCCTTTTGCAAAAAAAAAAAGTAAAAAGTGAAA  
TTTGATAG

TCCACAGATAGTGCTACTTTAGTAAACGTTACATCAAAAAGGTAGTATTAATTAATAAAAAAAAAAAGCCA  
ATAATTTGCGCAAGCTTTGCTCTACATAATAAAAATACAATTAGGATAGAAATGAATATTTTTTTAGCGG  
CAGTTTTA

GCACTAGAACATGGCGCAAGTACTTATTGTGACCTTTGGGGTACCGTTACCGTCAGTTTTCTTCAGCTAAG  
GCGCGCGGCCAGATAACTAAAAAAAAATATAGTTGCTGCTTAAAAACAATACACCCGTACTCTCTTGCC  
TGTAATAA

AGATAGTTATAAATCTATGATTGTATGGTTTCTTTGACATATTTATAGTTAATATATATATATATATGTGT  
TTAATTTTATAAAAATTCATCGTTTATATTCGATTATTTTTTATATGTCAACCTTTTTTTAAGAAATGTT  
CATATTTA

AAACGAGATGTATTGAATAGTGATGTTATGACCTTTTTTTTTACGCCTTTTTTTTTTTTTTTTTTTTTTT  
AATTTATCTCACTTTTCCCTTCTATTTTATGTACTAACAGATAATTTTATAATGATTTTCAATGATTTTGG  
TTCAGAAT

GGAAAAAAAAAATGGGTTTGGTGACTGCAGTAAAGACGTGCTAAAAAAAAAAGTTGTTTTTATCTGAAC  
CTTAAATATATCATTTATGAGTGTATATATTATACAAACGCAATAACAGTGGCTCCCGCCCTCCACCTCCG  
CCTGCTAC

AATATGAAATCAAATTAACATTTTTCTGTAATTTCCGTAATACAAAAACTATTTTCTTTTCGGAAGGC  
AAAAACAAAATTATAATAAAAATAAAAATATGTATAATATAATTTTTATCTTCTAACTTTTTATTTATTG  
AATTTTTA

TTTTTTTTCAATTGTTTCAAATAACCTGTATTGTTCAACTGGACAATTGTTCTGATATATATATATATA  
TATAATTTTCAATGAAAAAAAAAAAAAAAAAGAAAGAAATTAGAAGCTAGAAAGAAATAAGGAAAAGGAAA  
AGCAAACA

AATTCAGGTTAATTTCTAAAACTATATTGCAATCTTTTAAATATATGTATACACGTTTATTACCACGTATA  
CATATCCATATATATATATATATATATACATACTATTTATGATAAATTTTTAACAAGCAAACCCATTATTA  
AATGCTAT

TTAGTAGGCAGGACAATTTTCAGTGTTTGTAAAAATATATTTATATTTATATATTTAAATATACTAAATAAA  
AATAATACTATCATCGTTGTGATGCAAAAAAAAAAAAAAAAAATGAACAGAAAATAATAGTGATGTGAATGGTT  
TCGTGCCA

GAGAGCTGAAAAAATGCTCAAAAAGAGACTAACTAAGAGAAGAAACATACTTCAAAAAAAAAAAAAAAAAAGAA  
AAACAACAAAAAACGTATAAAATGAAATAAATTTCGAACCGCTTTTTTTCCTTTTTTTTTTTTTTACTTT  
GTTTGACC

TCTTGCTTACCCTATTCTCGCCGAGAGCTGTACAAGATATTTTTTACTTTTGCCATCTTATACTCATCCT  
AATCATCTGTTTCATTTTCCTTCTATTTCTTTTTTTTTTTTTTTTTTTTTTTTTTTTTTTTCAGTTTTCGAAG  
AAACTGCC

TTTTTTTCATGATTACGTTTTGACATTTTTCTTTTTTTTTCTCTTATTACGATTTACCTTTTTTATTTAT  
TTTTTTCATTTTAGTATTTTATTCTTCGTTATTTATGTATAGAAATTTTCATTTTCATTTAGATTCAGATT  
TGGTTATC

AAAGAAAAAAAAAAAAAAGTAAATTTCCACCTTACCCGTTTTTTTTAATGGAACAGTGATTGTTACGACAT  
TGAGATTTTAGATTTATATAATCACATACATATTAATAGTTAATGCACCTTAATTCTTTTGCACCTTCAT  
GTTCTATA

TGTAATGTGACACAATTTTGTCTATTGCGGAAACTGCAGCATAGTCAGTGTAATAATCGTACTGTTGCTTTT  
TCATTTTTTTTTTTTTTTTTTTTTTTTTCTCATATAGAAAACTGTTATTGAATGTTTTGACTAGTCTCATGA  
AATAAACA

CCTTTTTTACTTTTTGGGCTACATTATTCTTGAAAAAGTTCATGTTTTGTTATTTCTTTCTCACATACTT  
TATAAAAAAAGATAATTTTTTTAAAAAATAAATAACAAGTGAACATTATCAAATAAAAAAGCATTAT  
AGCGCCAC

CAAACCTTATGCCATTTCTATCATGATAACCAAAAATAGTCTTAACAAAATACATATAAGTAAATAATGCTA  
AATAAAAAAGCAAAAAAATAAATTTTATATCACACTTGTAAAACCTTTAAATGATCTTCTTTTTTACCTGT  
TTTATTCA

AGATTTTGTATCGGCTATTACGTCAAGTGAGAAGAGTTTTGGCCTTCGCTTCAGTTAGATCTTCTATTATT  
TCCTTTTTTTTTCTTTTTGTTTGAATTGTTTTTATTTTTTTTTTTTTGCGCGAACTTTGCTATATTGGGTA  
ACGCGTAA

GTTCAATTCTCTTTTCATTTTCGGTAGTGAGATGGCAGTTCGAGGGGTTTTTTATTCAAATAATAACTTCTG  
GCTTTTCGCTTTTATATAGCAGAAAAAAGCCGTCGAGGCGCGCGTTCATGCAATGGCTCAGTAACCT  
CGGGATAG

CCCTTAAGTTCTCAACCTTTTAGTTTTTTTTTTTTTTTTTTTTTTTTTTTTTTTATTTTGTATGGCATACTAACTATA  
ATATTTATATGTACATTTTATACAGTAACCTATTATTTACCGATATTCACCGGTATTTTACTTTAATAGATG  
CTGGTAAT

ATAAAAAATCATTAGATCCACATTACTAATTATTGAATATGGACAATAATATCAAATATATTATTATCAAAT  
TGATTATTTTGTGACGCGGCGTCAAATTTAATCGCGTCTGACGAATGAGCGGGTAATAAACTGTCTTTTT  
TTCATGAA

TCTGTGATTTTTTTTTTTCAATTGTTTCGAAATAACCTGTATTGTTCAATACTGGACAATTGTTCTGATATA  
TATATATATATAATTTTCAATGAAAAAAAAAAAAAAAAAGAAAGAAATTAGAAGCTAGAAAGAAATAAG  
GAAAAGGA

GTTGCTTTGTATTGAGCTGTATAAAATCATTAGATCCACATTACTAATTATTGAATATGGACAATAATAT  
CAAATATATTATTATCAAATTGATTATTTTGTGACGCGGCGTCAAATTTAATCGCGTCTGACGAATGAGC  
GGTAATA









TTTCTCAAAAACCTCATGGTTTCTCCATCACCCATTTTTTCATTTTCATTTGCCGGGCGGAAAAAAAAAAGGA  
AAAAAAAAAAAAAAAAAAAAATAAATGAACACATGGAAATAAGTCAAGGATTAGCGGATATGTAGTTCAGTC  
CGGTTAT

TCTTCCCCGCGTGTTCCTCGTACACCAACAATATATGCCATAATACACGTAACATTTTTTTATAAAAAGAA  
AAGGTAAGTGATATATATAAAATAGCGCCATGAGTAGGAAACTTTTCTGTACTGCAGATATGTGCCAGAC  
TGGCTCAG

TTTTTCATACTGGTAATTCAGAGAGCCAAGTCTTTCTTTATAATGCATAGCAATAAATAGTCATATATATA  
TATATATATATATATATATGTACATATATATGAACATATATATGAACAAATAAATGATAATGGTATGTGAT  
AGTCATTA

TATTTCCCTTTTGCATTTGTCTTCTTCGGTTTTCTGGTAGAATTTCCCTTAATGGGAGAGTAGTAACAAT  
GCAAAAATGAAGAAAATTGAGAAAAACAAAAAGAAAAAAAAAAAAAAAAAAAAAAAAAGAGAGCTATGTA  
GGTTGATT

AACAATGCTCAAAAGAAGACTAACTAAGAGAAGAAACATACTTCAAAAAAAAAAAAAAAAAAGAAAAACAACAAA  
AAAACGTATAAAATGAAATAAATTTCGAACCGCTTTTTTTCTTTTTTTTTTTTTTACTTTGTTTGACCTC  
CCCTAACT

TTCTTCCGTCCCGTGCCTGAGGGGGCGCGGCCATTTCGGTTTTTGCAATATGACCTGTGGGCCAAAAATCG  
AAAAAAAAAAAAAAAAAATAAGAGGCGGCTGCGGAATTTTATAAGACAAGCGCAGGGCCAAAGAAAAATAATAAT  
TGACGTGG

GAACCGTACACGCTTTTAGCCAAAAAAAAAAGAAAGGTAGAATATAAAATAAAAACTCGTATTTTCGTATTA  
AGACAAATATACAGAAATACAAATGAGATCATAAACGAACTAAAATAGGAAAATGAAAAAAAAAAAAAAAAAG  
ATTAGCGA

CAAAAACAAAATTATAATAAAAAATAAAAAATATGTATAATATAATTTTTATCTTCTAACTTTTTATTTATT  
GAATTTTTATATAGTAAATATAACACGTGATATATTTGAAATGTGATTATATTATATATATTGATGTTTAC  
ATATTTTT

AAAAGCTCAGTCGCGCGTGGCCTTTCTCTATGGAGATTTCTCAACGATATTAATCCTGTATATCTCTATT  
AATTTAGTTAATACATACACGATATATCGTCGCTTTTATTTTTTTTTTTTCAAATACTTCTTCTTCTTAAA  
GAGTTAAA

AGAATCATTCTTTTTTTTTTTTTTTTTTTTTTTTTTGCCTCACATTATATTCTTGGCATCTGCCTAGCTTTC  
GACTTTTTCGTTCAATTCCTAAAGCGCTAAAAAATAGTCTCCCCCTGAAAGTGGAGTAGGATAGTAGTAT  
ATGAAGTG

CGCGGGGTTGTGTGGCTCAAAAAGATCTGTTTTTGTATTAGCAATTTTTTATTTCCCTTTTTAAATGAATT  
TTTTTTCTTTCTGTTTCGAGACAAGGCCTTTTGCAAAAAAAAAAAAAAGTAAAAAGTGAATTTGATAGTG  
TAAGGGGA

CGGCATCTTTTCTTTTTCTTTTCTTTTTTTTTTTTTTCACTCTCCCTTTTAATGCCTCCACGGAGGTTTCGAA  
TGGGTTATACTAGAAAGAAAAAAAAAATAGTGATAATTAACAATGAAAAAAAAAAAAACAGCAACAAAATGTG  
GTATTGGG

ATTGAGCTGTATAAAATCATTAGATCCACATTACTAATTATTGAATATGGACAATAATATCAAATATATT  
ATTATCAAATTGATTATTTTGTGACGCGGCGTCAAATTTAATCGCGTCTGACGAATGAGCGGGTAATAAA  
CTGTCTTT

AAGAAAAACGAGAAAACGATATGATTATCCGATACCGACAAATTCATGTTTATTTTTTTTTTTTTTTTTTT  
TTTTTTTTTTAATTTTTCTTGGGCCTTTACATTGAGTACAGGGGCATAAGTGCAGGAGTTACCAGACGAC  
AACTAGCA

CCATCGTAATGGGATGATCATATGATGGGCGCTATCCTCATCGCGACTCGATAACGACGTGAGAAACGATT  
TTTTTTTTCTTTTTACCCTATTTTTGTGCGTCCTTTTTCAATTATAGCTTTTTTTTTATTTTTTTTTTTT  
CTCGTACT

ATAATAAAAAAATCCTTTATTAAGAGCGGAAGAATTTAATAATGAAGATGGGAATAAGCAAAACAAAAAC  
AAAGAAGGGAAAAAAAATAAAAAATCGTATTTATTTATTTAAAAAATCATGTTGATGACGACAATGGAAAA  
AAAAAACC

AAATTTGATATATATATATATATATATATATGTTTGTATGTATATATATATATACGTATATATATCATATATA  
CGAAAAGTAGAAAAAAAAGGTGATATTTGCTCGTGGAAGCTAATGCCACAGCTTGTGTTTCGTGTAG  
TTTGCCTT

TGGCAGTTCGAGGGGTTTTTTTATTCAAATAATAAATTCTGGCTTTTCGCTTTTATATAGCAGAAAAAAA  
GCCGTCGAGGCGCGCGCTTCATGCAATGGCTCAGTAACCTCGGGATAGAAAAAGGGCAACAATGTTGAGC  
TATTTTAG

CTGGACTGAAAAAAGGCAATTCGCGTACAATTTTCGTTGATCGTTCTTTATATAACCTTTGCATTAAATA  
AATTTAACAAAAAAGTTCTTTCTAAAATAATATTATGGTGATACATGAATGTGCTTTAGTTTTTTTCGTAG  
GCTCATCC

TCATGTTTTGTTATTTCTTTCTCACATACTTTATAAAAAAAGATAATTTTTTTTTAAAAAATAAATAAC  
AAGTGAACATTATCAAATAAAAAGCATTATAGCGCCACATGCGATGAACCTGAGCTTTTATCTTCATTAA  
TATATAGT

TCTTTTTCTTTCTTTTTTTTTTTTTTTCACTCTCCCTTTTAATGCCTCCACGGAGGTTCGAATGGGTATAC  
TAGAAAGAAAAAAAATAGTGATAATTAACAATGAAAAAATAAAGCAACAAAATGTGGTATTGGGT  
CACACCAC

TTTTGTTTACCGTCGCAAAAAAACGCGAAGAATACGCGTTGGTAAATTTTTGTGGTACGCGTAAA  
ACTGCTATTTGGTATCCTCTTTAGGGACGCGCCATTGTCTATACGGTAATATAGGGCTTTCTTCATTACC  
TGCTTGCG

CCATTTCTATCATGATAACCAAAAATAGTCTTAACAAAATACATATAAGTAAATAATGCTAAATAAAAAAG  
CAAAAAATAAAATTTATATCACACTTGTA AACCTTTAAATGATCTTCTTTTTTACCTGTTTTATTCACT  
TGTTTTTT

AATGCACCTCAGTATAAATTGTAAAATATAACATAAATCAAAGAAAAACGAGAAAACGATATGATTATCCG  
ATACCGACAAATTCTCATGTTTATTTTTTTTTTTTTTTTTTTTTTTTTTTAATTTTTCTTGGGCCTTTACA  
TTGAGTAC

CAAAATTTTTGAAAAACGAAATAAAGAAGAAAGATTATTATTATTAGTTACTTTTTTTATTGTTACTCCAGT  
ATGGACCTCTTAGGTGAGTGATCTTATTAATAAAAAAATAAAAAAATAAAAAAATATGAAAAAAAAGAAA  
TTAAAAAC

CACATCAAAAGGTAGTATTAATTAATAAAAAAATAAAAAAAGCCAATAATTTTCGCGCAAGCTTTGCTCTACATAA  
TAAAAATACAATTAGGATAGAAATGAATATTTTTTTTAGCGGCAGTTTTACCATAAGTAGCAAAACCCTAAC  
AATACAAT

AGTAAACGTTTACATCAAAAGGTAGTATTAATTAATAAAAAAATAAAAAAAGCCAATAATTTTCGCGCAAGCTTTG  
CTCTACATAATAAAAAATACAATTAGGATAGAAATGAATATTTTTTTTAGCGGCAGTTTTACCATAAGTAGCA  
AAACCCTA

TACACTCTTCTCATTTTTAAGTTCATTCTCTTTTCAATTTTCGGTAGTGAGATGGCAGTTCGAGGGGTTTTTT  
ATTCAAAATAAATACTTCTGGCTTTTCGCTTTTATATAGCAGAAAAAAGCCGTCGAGGCGCGCGCTTC  
ATGCAATG

GTTGCGGTGCAAAAACATTCTTTTGATCTCGAAGTAGGAAAACGACATTAGAAAAAGAAAAAAAAAACAA  
TCTGCGAATTATGCATTTCTTTTTTTCGCTTTTTTATTTTCTTTTTTCTTTTTTTCGACCTCCAATAGGGC  
TTTGGAAG

GATTACGTTTTGACATTTTCTTTTTTTTTCTCTTATTACGATTTACCTTTTTTATTTATTTTTTTTCATT  
TTAGTATTTTATTCTTCGTTATTTATGTATAGAAATTTTCATTTTCATTTAGATTCAGATTTGGTTATCTT  
TTTTTCATT

TCAAAATATGTATTCTTACTATCATAATTAATATTTTTATCGTTATTAATTATTATTATTACTATTA  
TTATTATTATTATTATTATTATTATTATTATTATTATTATTATTATTATTATTATTATTATTATTATT  
TTGTCTAT

TTTTTTCTTTCTTTTGAATGTGTGTATAAAAGAGAGAAAAAATGGTTATTTTCCAATTAATTAATTATTA  
CGATTGTTAAAGAAAAAATTTATCAACGAGGTTGATAGAAAAAAAAGTTTTTGTAGATATAGAAGAAAA  
AAGATTTT

CTTCAAAAAAAAAAAAAAGAAAAACAACAAAAAACGTATAAAATGAAATAAATTTTGAACCGCTTTTTTT  
CCTTTTTTTTTTTTTTACTTTGTTTGACCTCCCCTAACTCTTTCTTTTTACCTTCACAATTGTTTATTTTA  
ATATATGA

CACAATTTTGTCTATTGCGGAAACTGCAGCATAGTCAGTGTAATAATCGTACTGTTGCTTTTTTCATTTTTTT  
TTTTTTTTTTTTTTTTTCTCATATAGAAAACTGTTATTGAATGTTTTGACTAGTCTCATGAAATAAACATT  
AATAGTTA

GTGCTACTTTAGTAAACGTTTACATCAAAAGGTAGTATTAATTAAAAAAAAAAAAAAGCCAATAATTTTCGC  
GCAAGCTTTGCTCTACATAATAAAAATACAATTAGGATAGAAATGAATATTTTTTTAGCGGCAGTTTTTACC  
ATAAGTAG

CATCTCTTCAAAATTTTACAGTCATGCTCACCCCTTAAGTTCTCAACCTTTTAGTTTTTTTTTTTTTTTTTT  
TTTATTTTGTATGGCATACTAACTATACAAATATTTATATGTACATTTATACAGTAACCTATTATTTACCG  
ATATTCAC

ACAATGTGTATGATGAGGAGGAATGTACCTAAGCCAAAAAAAAAAAAAAAAAAAAAAAAAAAAAAAAAGAAAC  
AGCTTTTGCATATTCAATCCAGGCATAGGGCGACTATTTAGCACTCAACGATTTTTAAGCTTGTGTATTGC  
TGACATAA

TATTTACATAGAACCGTACACGCTTTTAGCCAAAAAAAAAAGAAAGGTAGAATATAAAATAAAAACTCGTA  
TTTCGTATTAAGACAAATATACAGAAATACAATGAGATCATAAACGAACTAAAATAGGAAAATGAAAAA  
AAAAAAA

TGCTTATCCAATTTTAGTTAGGAACTTTGGCATAATTTTCAAGTATTACATACTACCTAATCGACATAAAATA  
ATATTACATATTCATTTTTTTTAAAAATAATCATAATCAATTTATCCTTTTTTATTCCTTTTTTCTCCTGTG  
CAAGGTTG

ATCATAATTAATATTTTTATCGTTATTAATTATTATTATTATTACTATTATTATTATTATTATTATTATT  
ATTATTATTATTATTATTATTATTATTATTATTATTATTATTATTATTATTATTATTATTATTATTATTATT  
TATCTGCA

AAAAAAAAATTGTATTTAAGGCATCAAATGCGCGACATCATATACCTTTGTCCGCTGTTATCATACCTTGA  
ACCTCTACATTTTACGCTAGCGCGCGCAAAAAGAAAAAAAAATCATAAGCAAGAGTGGTACGGTAACCACA  
AGGCAATG

TATTATATTATTTGATACTTAACACAAAAATAAGTACGGATCACGTTTTTATTTTTTTATTTTCATTTTTCT  
TGTAATGATATATTATTAATAAAAACTAACAAAAGTTAATTATCTTAACGGGAAGTGGCGGCAACCTTTT  
GGAAAGCA

CTATATGTGGCGGCATCTTTTCTTTTTCTTTTCTTTTTTTTTTTTTTTTCACTCTCCCTTTTAATGCCTCCACG  
GAGGTTTGAATGGGTTATACTAGAAAGAAAAAAATAGTGATAATTAACAATGAAAAAAAAAAAAACAGCA  
ACAAAATG

CCGTCCACGAAAAATGTTAACATAAAATGCAAGAGAACAATTAATCGAATAATGTTAAATTATTGTAAAA  
CAATGTGTATGATGAGGAGGAATGTACCTAAGCCAAAAAAAAAAAAAAAAAAAAAAAAAAAAAGAAACA  
GCTTTTGC

CTTCTATTTCTTTTTTTTTTTTTTTTTTTTTTTTTTTTTTTTTTTCAGTTTTTCGAAGAACTGCCTTTTTAGAAAT  
GTAAAAGACGAAGTGAAGTATTCAGGAGTATATTATTACATACATACAAAGCAAGACAAAGAAACATTTTT  
AGATCTAA

ATTAAAAAAAAAAAAAAGCCAATAATTTTCGCGCAAGCTTTGCTCTACATAATAAAAAATACAATTAGGATAG  
AAATGAATATTTTTTTAGCGGCAGTTTTACCATAAGTAGCAAACCCTAACAAATACAATGTGAGACTAAAG  
TAAATCCG

AGAAAGAAAAATATGAAATCAAAATTAACATTTTTCTGTAATTTCCGTAATACAAAAACTATTTTTCTT  
TTCGGAAGGCAAAAAACAAAAATTATAATAAAAAATAAAAAATATGTATAATATAATTTTTTATCTTCTAACTTT  
TTATTTAT

GGTGAATCTACGAAACTGGTAAGTTCTTTTTAAGTATCACATTACAATAACAAACTGCAACTACCATAAA  
AAAAAATTGAAAAATCATAAATTAATAAAAAAAAAAATCAATTGAATTTTTTTTTTTTCATGATTACGTTTTG  
ACATTTTT

AGAAAACGATATGATTATCCGATACCGACAAATTCATGTTTATTTTTTTTTTTTTTTTTTTTTTTTTTTTTT  
AATTTTTCTTGGGCCTTTACATTGAGTACAGGGCATAAGTGCGAGGAGTTACCAGACGACAACACTAGCAGG  
CGGATGAA

GAGGAGGGAAAAAAATTTGTATTTAAGGCATCAAATGCGCGACATCATATACCTTTGTCCGCTGTTAT  
CATACCTTGAACCTCTACATTTTACGCTTAGCGCGCGCAAAAAGAAAAAAATCATAAGCAAGAGTGGTAC  
GGTAACCA

GGAAGAACACTAAAAGTACTTACATTTTACATGTATGTATACCTATATATATATATATATATATACTCTTAT  
AGATATATTTACAAATTAAGGAAAAATAATAAAATAACCTCCCTGTCACAAGTTAAAACACGGCCCAT  
CACTTATA

TCCCGGTTGTGTGATTGAAAACGGAACCTAAGCTTTACTAATCAACAATATTAACCTTTATAATAGATTCATA  
TATGCGCGTACATATATTATATACAATTTTTCTACACAAGAATGCTTAATAAAGATACGATAATTTTTTGT  
TCGCTTTT

GGTAGTGAGATGGCAGTTTCGAGGGGTTTTTATTCAAATAATAACTTCTGGCTTTTCGCTTTTATATAGC  
AGAAAAAAGCCGTCGAGGCGCGCGGTTTCATGCAATGGCTCAGTAACCTCGGGATAGAAAAGGGCAAC  
AATGTTGA

TCGACTCCAACAGGAATGTATATTCTACGAAAACGAGATGTATTGAATAGTGATGTTATGACCTTTTTTTT  
TACGCCTTTTTTTTTTTTTTTTTTTTTTTAATTTATCTCACTTTTCCCTTCTATTTTATGTACTAACAGA  
TAATTTTA

TTGTATCACGGTCTTTTATATATTATATTATTTGATACTTAACACAAAAATAAGTACGGATCACGTTTTTA  
TTTTTTTATTTTCAATTTTCTTGTAAATGATATATTATTAATAAAAACTAACAAAAGTTAATTATCTTAACG  
GGAAGTGG

AAAATAAAAAATATGTATAATATAATTTTTATCTTCTAACTTTTTATTTATTGAATTTTTATATAGTAAATA  
TAACACGTGATATATTTGAAATGTGATTATATTATATATATTGATGTTTACATATTTTTTATGTAGTACAA  
TTAATTTT









GGTAGTATTAATTAATAAAAAAAAAAAAAAAAAAGCCAATAATTTTCGCGCAAGCTTTGCTCTACATAATAAAAAATACA  
ATTAGGATAGAAATGAATATTTTTTTTAGCGGCAGTTTTACCATAAGTAGCAAACCCTAACAAATACAATGT  
GAGACTAA

CCCATTTTTTCATTTTCATTTGCCGGGCGGAAAAAAAAAAGGAAAAAAAAAAAAAAAAAAAAAAAAATAAATGAACAC  
ATGGAAATAAGTCAAGGATTAGCGGATATGTAGTTCAGTCCGGGTATACCATCACGTGATAATAAATCC  
AAATGAGA

GATCTCTTCGGAGGCGGGTTCAAACCCCGGGTATCAATATTTTTTTGAATCTACGCACCTTCAATAAG  
AATTAGGCTGTTAGGATAGCATTTTTTTTTCTATGTACAAAAGTATTCATACGTGGCTCCTTGTTACCCCA  
CAAACCTT

TAATGAATCGCAATATACGAAAAGCTAAACGGGTTTTTTCAGAATCCTCTTACCCAGCCTTGGATAATAGTT  
TTGGCCGAAAAAAAAAAAAAAAAAGAAAGAAAAAAAAATTGAAATTTTCGCGATCCGAACAAACAATGAACAGAAAA  
CAGAATAT

CTTCTTCGGTTTTCTGGTAGAATTTCCCTTAATGGGAGAGTAGTAACAATGCAAAAAATGAAGAAAATTG  
AGAAAAACAAAAAGAAAAAAAAAAAAAAAAAAAAAAAAAAGAGAGCTATGTAGGTTGATTGTGTTGTTCTAT  
GTAGTGCC

ATTTTTGTTATCTAATTTTTTTCCTTCCCACGTCCGCGGAATCTGTGTATATTACTGCATCTAGATATATGT  
TATCTTATCTTGGCGGTACATTTAATTTTTCAACGTATTCTATAAGAAATTGCGGGAGTTTTTTTTCATGTA  
GATGATAC

GGGCAGCCAGAAAAGGCATACTTGAGGGGTGAGTTTGCCAGGATTTAATGAAGTGTACATATAAGATATA  
AGTTTTTTTTATTTTTATTTCTAAAAAAGAAAAATAGTAAAACATGGACTGAAGCTAACGCTTTTGGAGT  
AATTAGTA

TTGTTTCTGTCATCACTTTTCTATACTTTCTCTTCCCCGCGTGTTTTCCGTACACCAACAATATATGCCAT  
AATACACGTAACATTTTTTTATAAAAAAGAAAAGGTAAGTGATATATATAAAATAGCGCCATGAGTAGGAAA  
CTTTTCTG

ACTATATTGCAATCTTTTAAATATATGTATACACGTTTATTACCACGTATACATATCCATATATATATATA  
TATATATACATACTATTTATGATAAATTTTTAACAAGCAAACCCATTATTAATGCTATAAATAAAGACA  
GCTTCTTT

CGGCGGGAATAATTAATAAAAAAGCACTTCTGAACGCGACGCTGAATAACTTATAATACGTTACATAAT  
TGTATACCGTCTAGTAACTTACATACGCTTGTCTATCTTGTATGCTGATGCATTTTATCAAATAGCGTTA  
TTTCCCGC

TTTTATCCCCTGCTTATCCAATTTTAGTTAGGAACTTTGGCATAATTTTCAGTATTACATACTACCTAATCG  
ACATAAATAATATTACATATTCATTTTTTTAAAAATAATCATAATCAATTTATCCTTTTTTATTCCTTTT  
TTCTCCTG

ATAATACATCTACACTCTTCTCATTTTTAAGTTCATTCTCTTTTCAATTTTCGGTAGTGAGATGGCAGTTCGA  
GGGGTTTTTTTATTCAAATAATAACTTCTGGCTTTTCGCTTTTATATAGCAGAAAAAAAAAGCCGTGAGGC  
GCGCGCGT

GTCATCCAAAAGATAGTTATAAATCTATGATTGTATGGTTTTCTTTGACATATTTATAGTTAATATATATAT  
ATATATGTGTTAATTTTATAAAAAATCCATCGTTTATATTCGATTATTTTTTATATGTCAACCTTTTTTTT  
AAGAAATG

TCTTTTTTCTCTTTTATCGCTTTTCGTAATGATGGTTCAGTTCATTTCATTATATACGCGCTCTCCATAACC  
CGTAACTTTTTATTATATATAGACTCGTTTACAATACAACGATAGCGATACCATTCAATTGAAGTTGTGAG  
ACCAGGTA

TGCAGACAGCAACAGCTACACTTAAGTACTTTTAATATTGGATTGAAAATTTTCGTTCTTGCGATGAGCTG  
CCCTTGCAAATTTTTCACCAAAAAAAAAAAAAAAAAAAGAAATGGAGTGAAAAAGAAACGAAAAAAAAAGG  
GCATGGGG

TATTTTTGTGCGTCCTTTTTCAATTATAGCTTTTTTTTTATTTTTTTTTTTTTCTCGTACTGTTTCACTGAC  
AAAAGTTTTTTTTTCAAGAAAAATTTTCGATGCCGCGTTCTCTGTGTGCAACGGATGGATGGTAGATGGAA  
TTTCAATA

TTTTTCCAATACTTGATTAACCTCTTTTTCGTTTCTTGTCTTTATTTTAGATTTGTTTTAATATCGCCTAA  
TTTTTCTTCTTTACTTTATATTTTTTTTTATTTTTTCGCCTAAAGATTTGTATCAATTAATTAGCCAACAAA  
AACAAAA

GTAGTAACAATGCAAAAAATGAAGAAAATTGAGAAAAACAAAAAGAAAAAAAAAAAAAAAAAAAAAAG  
AGAGCTATGTAGGTTGATTGTGTTGTTCTATGTAGTGCCCTTTATTTTTCTTTGGATTTAAATTTACAGAC  
ACATTATA

CTATAAAGTTTTAAATACTTCCCGCTATTTGTATATATGCATATCTTTATATTATGAAAGATTTTTTTTT  
ATTTACTTTTAGTCCGTATACTTTTATTTTGTTTTGTAGACAATCTCGAAGAACAAAAAAGATAAA  
ACAGAAAG

TTACTCTGGAAAGAAAACACAACCTTTTCAGTTGCGGTGCAAAAACATTCTTTTGATCTCGAAGTAGGAAA  
ACTGACATTAGAAAAAGAAAAAAAAAACAATCTGCGAATTATGCATTTCTTTTTTTCGCTTTTTTATTTTC  
TTTTTTCT

TTCCATTGTAATAACTAATTGTGTGCGTTGCGCGGGGTGTGTGGCTCAAAAAGATCTGTTTTTGTATTAG  
CAATTTTTTATTTCCCTTTTTAAATGAATTTTTTTCTTTCTGTTTCGAGACAAGGCCTTTTGCAAAAAA  
AAAAAGT

TTACGCCTTTTTTTTTTTTTTTTTTTTTTAATTTATCTCACTTTTCCCTTCTATTTTATGTAACAG  
ATAATTTTATAATGATTTTCATGTATTTTTGGTTTCAAGATTTTGACAAGGCAACTCTTGAATAATTGTCGTA  
TGCAAAAA

CACTCACTCCCAAACCTTATGCCATTTCTATCATGATAACCAAAAATAGTCTTAACAAAATACATATAAGTA  
AATAATGCTAAATAAAAAAGCAAAAAAATAAAATTTATATCACACTTGTA AACCTTTAAATGATCTTCTT  
TTTTACCT

TTCTTTTTGTTTGTAAATTGTTTTTATTTTTTTTTTTTGGCGGAACTTTGCTATATTGGGTAACGCGTAAA  
ATACTTTTTTATTATTGCAGTAAGGCGGAAGGGTCTTCCCCTTTGCATGTTAAATAGCATAACATGGCACCAC  
TCAGGTCC

TGGCAGACTTCCATCGTAATGGGATGATCATATGATGGGCGCTATCCTCATCGCGACTCGATAACGACGTG  
AGAAACGATTTTTTTTTTCTTTTTACCGTATTTTTGTGCGTCCTTTTTCAATTATAGCTTTTTTTTTTATT  
TTTTTTTT

CAGGAATGTATATTCTACGAAAACGAGATGTATTGAATAGTGATGTTATGACCTTTTTTTTTACGCCTTTT  
TTTTTTTTTTTTTTTTTAAATTTATCTCACTTTTCCCTTCTATTTTATGTAACAGATAATTTTATA  
ATGATTTT

CCCGTATCTTTTGTGTTTGAATTCAAGGAATACTTATTTAGAGTAGAAAGAATATATTTACTTAGATAACTT  
AATGTATAATATATAAAAAAATCAAAAAACAGGAAAAAAAAAATCATGAGTGAGTGGCACTTTTAACT  
GCAAGAAT

AAAAAAAAAAAAAGGAAAATAAAAAAAAAAAAAAAAAAAAAACGGGAGATTAACCGAATAGCAAACTCTTA  
AACTATGAAAAGGCAATCAATCCACTGTTTTCTTTTTCCATTTCTTCTAGCCTATTTGAACTGTCTGCTTC  
TGTTTTCTT

TTAGTCAAATGCACTAGAACATGGCGCAAGTACTTATTGTGACCTTTGGGGTACCGTTACCGTCAGTTTTCTC  
TTCAGCTAAGGCGCGCGCCAGATAACTAAAAAAAAATATAGTTGCTGCTTAAAAACAATACACCCGTA  
CTCTCTTG

AGCAGTAGTTGCAAAAAGTGCCTTTTTACTTTTTGGGCTACATTATTCTTGAAAAAGTTCATGTTTTGT  
TATTTCTTTCTCACATACTTTATAAAAAAGATAATTTTTTTTTAAAAAAAAAAAAAAAAAATACAAGTGGAAACAT  
TATCAAAT

AAAAATGTTAACATAAAAATGCAAGAGAACAATTAATCGAATAATGTTAAATTATTGTAAAAAATGTGTAT  
GATGAGGAGGAATGTACCTAAGCCAAAAAAAAAAAAAAAAAAAAAAAAAAAAAAAAAAGAAACAGCTTTTGCAT  
ATTCAATC

CAAGAAAGACCAAAGGATGCTCCCGGTTGTGTGATTGAAAACGGAAC TAAGCTTTACTAATCAACAATATT  
AACTTTATAATAGATTCATATATGCGCGTACATATATTATATACAATTTTTCTACACAAGAATGCTTAATA  
AAGATACG

ATGCTTTTGTGTTTGGCTTGATATTTTTGTTTTTAATGAACTGTAAGCACACAGAGCTATGGGATGTGTG  
GCAATGACTGTATATATATGTATATATATATATATATATATATATATATATATATTTTTATTTATTTATTTAAAA  
TATAGCTA

CTTGAGGGGTGAGTTTGCCAGGATTTAATGAAGTGTACATATAAGATATAAGTTTTTTTTATTTTTATTTTC  
TAAAAAAAAAGAAAAATAGTAAACATGGACTGAAGCTAACGCTTTTGGAGTAATTAGTAGCATTATATATG  
GTAAAAGT

GGTACCTGCAATCTTTATTTATTTTATTTGAAGTAATAGGAATTATTTATATTATTGTGATAAGAAGTAGT  
ATTCTATTATTATAACTATATTAATAAAAAATTTTTTTCTATTGAAAACCAATTTTTTACACCAAATAT  
CAGACAG

TGATGAGGAGGAATGTACCTAAGCCAAAAAAAAAAAAAAAAAAAAAAAAAAAAAAAAAAGAAACAGCTTTTGCA  
TATTC AATCCAGGCATAGGGCGACTATTTAGCACTCAACGATTTTTAAGCTTGTGTATTGCTGACATAAAT  
TCCGGCTT

CGTCTGTTTCATTGTGCAAGCTTTTTAAAGAGATTTTTGCCTATAAAGTTTTAAATACTTCCCGCTATTT  
GTATATATGCATATCTTTATATTATGAAAGATTTTTTTTTATTTACTTTTAGTCCGTATACTTTTTATTTTG  
TTTTGTTA

AAAATATGAAAAAAAAAGAAAATTA AAAACTAAACAAATTTTATGACAGGAATAAAA ACTATAAAAAATGA  
AAAGCAAAAAAAAAAAGGCTACTGGATTTTTA ACATCTTGTCTTTTCTTTCCCTTTATCATTTTTTCTCA  
TTTACTTT

AAACAATTCTTTTATTAGATGTATTTTTTATCATCGTATTAGGTGTAATATATATATATATATATATATATATA  
TATATATATAATATATATATGTAGTATACACACGTGGACGACCATTAACGAATGTTGTATATGCTTATGCGGA  
ACCTTTGT

AACACGAAAAATATCACAGTTGACGAAAGAAGACACGTGCGCTAAACGCGTAATGAATCGCAATATACGAA  
AAGCTAAACGGTTTTT CAGAATCCTCTTACCCAGCCTTGGATAATAGTTTTGGCCGAAAAAAAAAAAAAG  
AAAGAAAA

ACCTCGCCCCAGTGCATAATAAAAGTAAAAAAAAAAAAATCAAAC TTTATTGGGATAAAAATAAAAATCAGA  
AAAACCCTTATATATGTATATGTAGTTAAATGAAGCCAGTTTTTTTTCGTCTGGTTTTGTTTCAGCCTATATG  
CCCTCTTT

GTACCGTTACCGTCAGTTTTCTT CAGCTAAGGCGCGCGCCAGATAACTAAAAAAAAATATAGTTGCTGC  
TAAAAACAATACACCCGTA CTCTTGCCTGTAAAAACCTCGAAGGACCAAAGATACCCTCAAGGTTCT  
CATCTGTG

ACTTATTTATTTACCAATCAAATGATTTTTTTAACTTTTCACGATCTATATAATTACGTTAATTTTCGAGTA  
TATAACAATGAAAATATATATCTACGTTGTTTTAAATTGAAAAAGAAGAACGGAAGTTCTATTAATGAGC  
CGAGACCG

ACTTTCCCAAAGAATAATAACGAGTACAATACATATATATATATATATAATATAACACATGTAAGTG  
ATGACTATTCTTAATACAAAAAATTTCCCTTTTATAATAACTATTCTTAGCATTAAATAACCCGTTACTG  
ACAAAAAG

TTTTAATATTTTTTTTTTTGTTTTGGTTGTCATTACTGTCACTACTATCATTATTATTACATTTATCTTCT  
AATGTATTGGAAGTAATAGTATTATCATTATATTTAAATTTTTTCATGGCTTTCTCTAGTGAGTTTTGATC  
AAGAGTGT

AATTCAACCGAATAAGGAAAACTAAGCCACTTCACGCGGTTTCGCGATATTTGTCCAGCCTCTTTTTCCGAA  
AAAAAAAAAATTAATAATAAAATGAAACGGACAGGAATTGAACCTGCAACCCTTCGATTGCAATCTTATT  
CCGTGGAA

ATGATTAAGAGTCATACGCGCTACCGATTGCGCCAACAAGGCTATTTTCGTTGAAAAATTCAGGCTTCAAAA  
TTATTATATGTATCAAAAATATTTTTTTTGAGAAATTTCAAATCATTATCTACGCTAGCCTTACTATTTTTT  
CACCCAGA

TTGTAATTGTTTTTTATTTTTTTTTTTGCGCGAACTTTGCTATATTGGGTAACGCGTAAAATACTTTTTTA  
TTATTGCAGTAAGGCGGAAGGGTCTTCCCCTTTCATGTTAAATAGCATAACATGGCACCCTCAGGTCCAG  
AACGTGAC

CATTTACTTTGTTATTAATTTTTTTTTTTCAAGTTCTCCACATATACATATGTAAGAATTGAGTCTATCTCT  
TTCTAATATTTAAGAAATACATAAAAAAACCAATTTTTTTTTTTTATTACTAGCAAATTTATTTTTGTGAA  
GTGAAATT

AAGCCAAAAAAAAAAAAAAAAAAAAAAAAAAAAAAAAAGAAACAGCTTTTGCATATTCAATCCAGGCATAGGG  
CGACTATTTAGCACTCAACGATTTTTAAGCTTGTGTATTGCTGACATAAATTCGGCTTTAGAATCCAATA  
TTGAAAAA

GGGGGAGTAATATGATATCAAGAAGGCGATCACTTATTGAAGTCCACATAGATACACACAGATAAACATAT  
ATATATTATGTATATATATATATATATATATATATATATATATATATATATATATATATATATATATAT  
CATTATCA

TAATCATCTGTTTCATTTTCCTTCTATTTCTTTTTTTTTTTTTTTTTTTTTTTTTTTTTTTTTTTTTTTT  
GAAACTGCCTTTTTAGAATTGTAAGACGAAGTGAAGTATTGAGGAGTATATTATTACATACATACAAAG  
CAAGACAA

TAATGTTAAATTATTGTAACAATGTGTATGATGAGGAGGAATGTACCTAAGCCAAAAAAAAAAAAAAAAAAA  
AAAAAAAAAAAAAAAAAGAAACAGCTTTTGCATATTCAATCCAGGCATAGGGCGACTATTTAGCACTCAACGA  
TTTTTAAG

GCGATGAGATGAGTTTAAAATTTTCATTTTTTTAGCCGATCAAGCAAAGAAAAGAAAAAAAAAAAAAAAAACTG  
AAATTTCCACCTTACCGTTTTTTTTAATGGAACAGTGATTGTTACGACATTGAGATTTTAGATTTATATAA  
TCACATAC

ATCTGTGAAATTTCTCAAAAACCTCATGGTTTCTCCATCACCCATTTTTTCATTTTCATTTGCCGGGCGGAAA  
AAAAAAGGAAAAAAAAAAAAAAAAAAAAAAAAAATAATGAACACATGGAAATAAGTCAAGGATTAGCGGATATGT  
AGTTCCAG

CTTAAATGTATATTGATTTTCTATATATATATATATATATATATATATATATATATATATATATATATAT  
TAAGTAGTAGCTTGGAAAACGCCAAAGTTGTACTTAGAATGAGGTTTTAAAAAAAAAATTATAAAAAAAA  
CCAAGCGA

GTTATTAATTTTTTTTTTCAAGTTCTCCACATATACATATGTAAGAATTGAGTCTATCTCTTTCTAATATT  
TAAGAAATACATAAAAAAACCAATTTTTTTTTTTTTATTACTAGCAAATTTATTTTTGTGAAGTGAATTCA  
TACATTGG

TTTCATTTTCCTTCTATTTCTTTTTTTTTTTTTTTTTTTTTTTTTTTTTTTTTTTCAGTTTTTCGAAGAACTGCCT  
TTTTAGAATTGTAAAAGACGAAGTGAAGTATTCAGGAGTATATTATTACATACATACAAAAGCAAGACAAAG  
AAACATTT

ATTTTTGAAACACTTTGCTGCTTAGGCTTTTAATGAGGTATGCTTTTTAAAGATTTATATATTTTTTATACAC  
GCTATATACACAATTTTCGCTGATGATTTTTGTTTTATTATTGATTTTTAAATTAACCGTAGAAAATACTAA  
GTGGAAAG

TTTTTTTTTTTGCCATTCTTATACATTTTCTTTCTTCTGAAATTAAGTGTACACCCATACCCCTATATACAC  
CCATACCCCTATTTTTAAATATAAAAAAGTAACTTCATTTTGAAAGACCACTCTGCATCAGCACGCGGGCTC  
TGGAAGGA

CAAAACCCTAACAAATACAATGTGAGACTAAAGTAAATCCGGGTAATACAAAATACAATTTTTTTTTTATTCT  
TCACAGCGTTTTTTTCGACGGAGGAGGGAAAAAAAAAATTGTATTTAAGGCATCAAATGCGCGACATCATA  
TACCTTTG

ATAAAAAAAAAAGTAGCATTAAATGTTATGGATGATTGGGATATATATGCAAATAACCCAATCTTACATATG  
TTTCTTTCAAATATATGAGTATATATAACGATTAATTGTTTTTTTTTTATTGGGTTTGTTGATTTTTCCAAC  
GCACCATA

TGCAAAAAATGAAGAAAATTGAGAAAAACAAAAAGAAAAAAAAAAAAAAAAAAAAAAAAAAGAGAGCTATGT  
AGGTTGATTGTGTTGTTCTATGTAGTGCCCTTTATTTTTCTTTGGATTTAAATTTACAGACACATTATATC  
TTGAGGTT

AAAAGTATTATGCATATATATATATATATATATATATATATATATATATATATATATATATATATATATAT  
TACAGTAAAGGATGCTACACCACCCCGGGCTAACTTTATGGCTTCTACTATTTTCAGGTTCCCTTTTCGCGTC  
TTTTATCT

TTTAAGGTCTCTATATGTGGCGGCATCTTTTTCTTTTTCTTTTTCTTTTTTTTTTTTTTTTCACTCTCCCTTTTAA  
TGCCTCCACGGAGTTTGAATGGGTTATACTAGAAAGAAAAAAAAAATAGTGATAATTAACAATGAAAAAA  
AAAAACAG

TTCTATCTGTTAAGCGTGTTATGGTTATCTGCGATGAGATGAGTTTAAAATTTTCATTTTTTAGCCGATCA  
AGCAAAAGAAAAGAAAAAAAAAAAAAACTGAAATTTCCACCTTACCCGTTTTTTTTAATGGAACAGTGATTG  
TTACGACA

TGGCAATATTGTCATAATAAATATAAAAAAACTGTAGTTTCTTTTTAAATTTTTCTACTTAAGTTTGTAG  
TTATACTGTACCTAGGTATATATAAATATATATAAATAAAAGTGGCCAAGAATAAAAGAACGCACCCCGTC  
GTTGACTT

TATTCTATTATTATAACTATATTAATAAAAAATTTTATTTTCTATTGAAAACCAATTTTTTACACCAAATA  
TCAGACACGCTTTGTCTATTTCTATCATATAGCGACTGTGATATAATGCGCGCGTGTTTTGAACGGCATT  
TTTTAGCC

TTTTTAAATTAATTCAGGTTAATTCTAAAACTATATTGCAATCTTTTTAAATATATGTATACACGTTTCATT  
ACCACGTATACATATCCATATATATATATATATATATACATACTATTTATGATAAATTTTTAACAAGCAAA  
CCCATTAT

ATCATGTCCTTTTTTTTTTTGCCATTCTTATACATTTTCTTTCTTCTGAAATTAAGTGTACACCCATACC  
CTATATACACCCATACCCCTATTTTTAAATATAAAAAAGTAACTTCATTTTGAAAGACCACTCTGCATCAGC  
ACGCGGGC

CGAACTAAGTGAAAACATGGTCTTGCTTCACCCTATTCTCGCCGAGAGCTGTACAAGATATTTTTTACTTT  
TGCCATCTTATACTCATCCTAATCATCTGTTTCATTTTCCTTCTATTTCTTTTTTTTTTTTTTTTTTTTT  
TTTTTTTT

TTGTGCGTACAGTATAATGCACTTATTTATTTACCAATCAAATGATTTTTTTAACTTTTCACGATCTATAT  
AATTACGTTAATTTTCGAGTATATAACAATGAAAATATATATCTACGTTGTTTTAAATTGAAAAAGAAGAA  
CGGAAGTT

TGTTTTATTCAAATGATCATGTACCTTCTTCTCGCGAAAGTTTTTAATTTAAATTTACTGATAGTTTTTTAA  
TGATGAACTTCTATAACTAAACCATAATAATGAAAATTACAGGTAATATTTATATCACAAGAAACGGCCCC  
TCTTTTCT

AATATTTTTTATCGTTATTAATTATTATTATTACTATTATTATTATTATTATTATTATTATTATTATTATTA  
TTTATTATTTATTAATTATTAATTGTTAATATTATTAATTCTTGTCTATTGTCTTTTGATTTATCTGCACC  
GCCAAAA

ACGTTAGGAATCGACTCCAACAGGAATGTATATTCTACGAAAACGAGATGTATTGAATAGTGATGTTATGA  
CCTTTTTTTTTACGCCTTTTTTTTTTTTTTTTTTTTTTTAATTTATCTCACTTTTCCCTTCTATTTTATG  
TACTAACA

ACTAAGCCACTTCACGCGGTTTCGCGATATTTGTCCAGCCTCTTTTTCCGAAAAAAAAAAAAATTAATAATA  
AAATGAAACGGACAGGAATTGAACCTGCAACCCTTCGATTGCAATCTTATTCCGTGGAATTTCCAAGATTT  
AATTGGAG

GGCGCAAATGTTAGAAGTTCAAATGAAGCCTAAGTATCACGCTAATTGAAGTTTTTTTTGATCACTCCAA  
TAGGCAAATCTATAGATATATAAAAAATATAGACAAGACTTTTTTTTACATTGCCAGTTTTCTTTTTCTCT  
TTTTAGTA

CGGAAGCTAACAAAATTTTTGAAAAACGAAATAAAGAAGAAAGATTATTATTATTAGTTACTTTTTTTATT  
GTACTCCAGTATGGACCTCTTAGGTGAGTGATCTTATTAATAAAAAATAAAAAATAAAAAATATGAAAA  
AAAAAGAA

AAAAGGCATACTTGAGGGGTGAGTTTGCCAGGATTTAATGAAGTGTACATATAAGATATAAGTTTTTTTA  
TTTTTATTTCTAAAAAAGAAAAATAGTAAACATGGACTGAAGCTAACGCTTTTGGAGTAATTAGTAGC  
ATTATATA

TTGTGCAAAGCTTTTTAAAGAGATTTTTGCCTATAAAGTTTTAAATACTTCCCCGCTATTTGTATATATGC  
ATATCTTTATATTATGAAAGATATTTTTTTATTTACTTTTAGTCCGTATACTTTTATTTTGTTTTGTAGA  
CAATCTCG

AAAAAAAAAGAAATTTTTCCAAAAGAGTATATTTATATGTATGTATACATGTAGGGAAAATAAGAACTTT  
ATTAATAGTAAAAAGCATATATACTTTATTATTAATCTTTTTGTTTTTCTCGAGAAGCTTAATTTTGGGT  
CAATTCOA

TTAACTAGCTGGGGTATATTTTTTTTTCTTTCTTTTGAATGTGTGTATAAAAGAGAGAAAAAATGGTTATTT  
TCCAATTAATTAATTATTAACGATTGTTAAAGAAAAATTTATCAACGAGGTTGATAGAAAAAAAAGTTT  
TTGTAGAT

TCTATCTATATATATATGTATGTTCTTTATTGTTTGTCTTTACCTTTATATATAAACATATATAGCCATAT  
AAGAATATAATATTACCACTCCACTGTATTTTGTATCCTGCCTATTTTTGCTAGATTACAGGACGCGCGAG  
CCTTTTCAG

TTTTTTTTTTTTTTTTTTTTAATTTATCTCACTTTTCCCTTCTATTTTATGTACTAACAGATAATTTTAT  
AATGATTTTCATGTATTTTTGGTTTCAAGATTTTGAACAAGGCAACTCTTGAATAATTGTCGTATGCAAAAAA  
ATTGTTTA

CTTTTTAAAGAGATTTTTGCCTATAAAGTTTAAAATACTTCCCGCTATTTGTATATATGCATATCTTTAT  
ATTATGAAAGATATTTTTTTTATTTACTTTTAGTCCGTATACTTTTATTTTGTGGTTAGACAATCTCGAA  
GAACAAAA

CCCGTTATTATGATCGCTCGTGACGGATCGTCTTTGCCCTTTTTGGTAAAACGTAAACAAAATAACAATAG  
AAAAATAACAACCTTTATCAATGTTTATTTTTATTTATTAAGTATTTGATGTGAAGTAGTTTTTCTAAATG  
CTACTTCA

GAAACGAAACAAATCATGTGTTACCCGTCCTGCACAATCATGAGTGCCTGCGGTTTCCATATTGGAACGGC  
ACCTTCCTTTTTTGGGAAGTCACGTTCCCTGCAGCGCGTTTTCTTTTTTTTTTTTTTTTTTTTTTTTTTTT  
GGTTTTTT

ACAAAATATATAGGTACCAAACCTCATTATAATTTCTGCCATTTAATAGTTTAAAGATGCTATTCCGTTTTCG  
TATTTTTTCAATTTTTTATACCTACTATTGCGCGAAATCAAAATAGCATACTAAGAAAAAGCAATATCATGA  
ATTGCTGA

TCGTTCTAACGTTGGTAAAATGAAAAATATGAAAAACAGTTATCATGGCTACTATAATAACAATAATAATA  
ATAATAATAATAACAATAATAATAATAACAGTAATGCTACCAACAGCAACAGCGCGGAAAAACAACGTAAA  
ATTGAGGA

ATGTCTATTTCAATGCAATTACGTGAAAAATAAAGAACGCTACCATAAAAATGTTAAAAACTGGTTAAAA  
ATGTCAAAAAATGGTCCGAAAACGTAAAAATATTCGTGATACAGTTTGCATAAAAAAAACTATTGTGCG  
CGATTAAT

GACCTTTGGGGTACCGTTACCGTCAGTTTTCTTCAGCTAAGGCGCGCGCCAGATAACTAAAAAAAATA  
TAGTTGCTGCTTAAAAACAATACACCCGTACTCTCTTGCCTGTAAAAACCTCGAAGGACCAAAGATACCC  
TCAAGGTT

CGCGGTTGCGCGATATTTCCCTTGCTTAATGCCGAAGTAATTCCTTCGTTTACCATACTCGAATCTATT  
GTGTTGTTGAAAAATAAAAAAAGAACAGGTTATATAATTGTGAGTTGATCAGTATATAAATGAGAG  
AAAAGAAG

TTTTGATCTCGAAGTAGGAAAACGTACATTAGAAAAAGAAAAAAAACAATCTGCGAATTATGCATTTCT  
TTTTTTCGCTTTTTTATTTTCTTTTTTCTTTTTTTCGACCTCCAATAGGGCTTTGGAAGCCCTATATGTAA  
TCTAGGGT

TTCTTTTTTTTTTTTTTACTCTCCCTTTTAATGCCTCCACGGAGGTTCGAATGGGTTATACTAGAAAGAAA  
AAAAATAGTGATAATTAACAATGAAAAAAGAACAGCAACAAAATGTGGTATTGGGGTCACACCACTC  
ATTGACTC

TACAAGAAAATGGCAAATATTGTCATAATAAATATAAAAAAAACTGTAGTTTCTTTTTAAATTTTTCTAC  
TTAAGTTTAGTTATACTGTACCTAGGTATATATAAATATATATAAATAAAAGTGGCCAAGAATAAAGAAC  
GCACCCCG

TAGTAAGAGAGGTGAAATCTACGAAACTGGTAAGTTCTTTTTAAGTATCACATTACAATAACAAAACGTCAA  
CTACCATAAAAAAATTGAAAAATCATAAATTAAAAAAATCAATTGAATTTTTTTTTTTCATGA  
TTACGTTT

TCTGCGGAAGACTAAGACAATCAAAATATGTATTCTTACTATCATAATTAATATTTTTATCGTTATTAAT  
TATTATTATTACTATTATTATTATTATTATTATTATTATTATTATTATTATTATTATTATTATTATTATTA  
ATTGTTAA

AATTATAATAAAAAATAAAAAATATGTATAATATAATTTTTATCTTCTAACTTTTTATTTATTGAATTTTTAT  
ATAGTAAATATAACACGTGATATATTTGAAATGTGATTATATTATATATATTGATGTTTACATATTTTTTA  
TGTAGTAC

GAAGAAAATTGAGAAAAACAAAAAGAAAAAAAAAAAAAAAAAAAAAAAAAGAGAGCTATGTAGGTTGATTG  
TGTTGTTCTATGTAGTGCCCTTTATTTTTCTTTGGATTTAAATTTACAGACACATTATATCTTGAGGTTTT  
TAGTCCCT

GATAAGCGCGGGCTTTTTCGCCCTATACGGCTTGGGCCTGACTAAAATGTGATTCTGTGTTTTACGTATAT  
GCGCGTATATAGAGCAATTGATTGACTTATTACGCAGTTTATCAAGATAAATTTCTTTGTTCTTGCTTACGG  
GAGTGTGG

CCCTTTTTCTGTACAGGTTTCCAATTTTTTTGACGACTAAATAATAACATAACCACTACGTTCACTTCC  
CCGTATATATACATATATACTTAATATTATAAACGCATATACTTTTATAAACTTGGAATAAGTATTATATA  
TTTTTTTT

GTCCTTTTTCTTTCCCTTTATCATTTTTTCTCATTACTTTGTTATTAATTTTTTTTTTTCAAGTTCTCCACA  
TATACATATGTAAGAATTGAGTCTATCTCTTTCTAATATTTAAGAAATACATAAAAAAACCAATTTTTTTTT  
TTTTATTA

AAAATGAAAAAAAAAAAAAAAAAGATTAGCGAAGGCAAACCAGAAAGCAGTCCTTTGATATAACAGAGAAAA  
GAAGATTATCAAGCCTTAATTTAAAGTTAAAAATATTGGGTATCGTTTTTTAAATCAAGATTTTTTTTTGT  
TTTTTTTT

TATAATTGCATTTTTCTTTATACAAAATATATAGGTACCAAACCTCATTATAATTTCTGCCATTTAATAGTT  
TAAGATGCTATTCCGTTTCGTATTTTTTCAATTTTTTATACCTACTATTGCGCGAAATCAAAATAGCATACT  
AAGAAAA

TTAATAAAGACAAATGCAAAAGTTTTTTTTAAAGTATGGATGTATAATAATAAACGATAATACGAACACT  
ATTGGGACTAATAATGATTTATAGTTTTTTTTTACACAGGGGATTTAACGTTCCGCGACCCTTTTTCTTTA  
ATTTAACC

ACAACCACTAAACAATCTCGTTCAAAAGCTCTAATTACTTGTATATTATTTTATACGTTTATGTCTATTTT  
AATGCAATTACGTGAAAAATAAAGAACGCTACCATAAAAATGTTAAAAACTGGTTAAAAATGTCAAAAA  
TGGTCCGA

ACATTTTTTTTTGTTTATTCAAATGATCATGTACCTTCTTCTCGCGAAAGTTTTAATTTAAATTTACTGAT  
AGTTTTTTAATGATGAACCTTCTATAACTAAACCATAATAATGAAAATTACAGGTAATATTTATATCACAAG  
AAACGGCC

ATTAATAAAAAATTTTATTTTCTATTGAAAACCAATTTTTTACACCAAATATCAGACACGCTTTGTCTATT  
TCTATCATATAGCGACTGTGATATAATGCGCGCGTGTTTTGAACGGCATTTTTTTTAGCCTGCGAATATGGA  
TAGATGAT

GAAACAACCAAGTCCTGTGTCCTGTGGTAGACCCACTTGTTTTACCGCAGAGGGCCCTTTTTTTGTTTACC  
GTCGCAAAAAAAAAACGCGAAGAATACGCGTTGGTTCGTTAAATTTTTGTGGTACGCGTAAACTGCTATTTG  
GTATCCTC

CTACCATAAAAATGTTAAAAACTGGTTAAAAATGTCAAAAAATGGTCCGAAAACGAAAAATATTCGTGA  
TACAGTTTGCATAAAAAAAAAACTATTGTGCGGATTAATATAACCTACTAGACTTAAATGACGACACTTTA  
ATATGAAG

TGAAGAAAAAAAAAAAAAAAAATGGATGAGCCTTCCAGTTCATTGAAATTTCTTCAGTTCTTATTTTTTTTTCAA  
AAAGAAAAGTTTTCAGTACCCTGTTCCAAAAAAAAATGAAAAAATGAAAATCCAGTATCCTTCCATAAAAA  
TTAAAAGT

TTAGAAGTTCAAATGAAGCCTAAGTATCACGCTAATTGAAGTTTTTTTTGATCACTCCAATAGGCAAATC  
TATAGATATATAAAAAATATAGACAAGACTTTTTTTTTACATTGCCAGTTTTCTTTTTTCTTTTTTAGTATC  
TATTTCAA





TTAGCCGATCAAGCAAAGAAAAGAAAAAAAAAAAAAAAAACTGAAATTTCCACCTTACCCGTTTTTTTTTAATGG  
AACAGTGATTGTTACGACATTGAGATTTTAGATTTATATAATCACATACATATTAATAGTTAATGCACCT  
TTAATTCT

CCGCTTTTTTTCCTTTTTTTTTTTTTTTACTTTGTTTGACCTCCCCTAACTCTTTCTTTTTACCTTCACAAT  
TGTTTATTTTAAATATATGATTTTTAAATTAATTCAGGTTAATTCATAAACTATATTGCAATCTTTTAAAT  
ATATGTAT

AAAAAATTGAAAAATTTGAAAAAAAAAAAAATCTAGAAACATATTTTCTAAATGAAAAATCGGAAGCTAAC  
AAAATTTTTGAAAAACGAAATAAAGAAGAAAGATTATTATTATTAGTTACTTTTTTTATTGTAATCCAGTA  
TGGACCTC

TGCTACATTGACGTTAGGAATCGACTCCAACAGGAATGTATATTCTACGAAAACGAGATGTATTGAATAGT  
GATGTTATGACCTTTTTTTTTTACGCCTTTTTTTTTTTTTTTTTTTTTTTTTTAATTTATCTCACTTTCCCTT  
CTATTTTA

CCTCCCAGTGACAATTTTGTCTTTTTTCTCTTTATCGCTTTTCGTAATGGTCAGTCATTCATTCATTA  
TATACGCGCTCTCCATAACCCGTAACCTTTTTATTATATATAGACTCGTTTACAATACAACGATAGCGATAC  
CATTCAAT

TTTTTTTTTTTTTTCGTTATATAGGTTCTGCGCATGTGAAAAAAAAAGAGAAGAAAATAAAGCCAATTATAAGT  
CATTACTGACGAAATTATAAGATAAATTAGAGGTACAATATACAACTAGTGAATAACAGAACTATATAGG  
ACTTAGAT

TAAGCGTGTTATGGTTATCTGCGATGAGATGAGTTTAAAATTTTCATTTTTTAGCCGATCAAGCAAAGAA  
AAGAAAAAAAAAAAAAAAAACTGAAATTTCCACCTTACCCGTTTTTTTTAATGGAACAGTGATTGTTACGACATT  
GAGATTTT

TTTGTTTAAATGGTGTAAGCTGCCTATATGTTACTATTGAGTACTCATCTCATCGCTTCTTTTCAGAACAAA  
TTTTTCATATTTTTTTTTTTTTTCTTTTTCTTTTTTTTTTTTTTTTTCTTTGACTGTTACCCGTTGTTTATATTTG  
TAGGAAAA

TAATATATGATTTTTTAAATTAATTCAGGTTAATTCATAAACTATATTGCAATCTTTTAAATATATGTATA  
CACGTTTATTACCACGTATACATATCCATATATATATATATATATATACATACTATTTATGATAAATTTTT  
ACAAGCA

CACGGGTAAAAATTTGCATCGTGATGATACCAAGAAGTAGTAAAAGCTCATGGCTTCTTATATATTATAT  
ATGGAATACATTTATAATAAAATAATAAGAATTATATATTTTATGATTATATTATTACATAAAGTATTCCC  
CATTATAA

TTTTTTTTTCAAAGAAAAGTTTTAGTACCCTGTTCCAAAAAAAAATGAAAAAATGAAAAATCCAGTATCCT  
TCCATAAAATTTAAAGTTCCATTATTTATGGGTAAGTAAGTACCACTGATTATATACCATATTTATAAA  
GTGCATGA

TAGAGGCTAAATAAAAAAAAAAGTAGCATTAAATGTTATGGATGATTGGGATATATATGCAAATAACCCAAT  
CTTACATATGTTTCTTTCAAATATATGAGTATATATAACGATTAATTGTTTTTTTTTTATTGGGTTTGTTGA  
TTTTTCCA

TATAAGAAATAGCGTTCTTTCTTTCTTTTCGTGTAATGTGACACAATTTTGCTATTGCGGAACTGCAGCAT  
AGTCAGTGAATAATCGTACTGTTGCTTTTTTCATTTTTTTTTTTTTTTTTTTTTTTTTCTCATATAGAAAAAC  
TGTTATTG

CTACGGCAAATTAGTCAAATGCACTAGAACATGGCGCAAGTACTTATTGTGACCTTTGGGGTACCGTTACC  
GTCAGTTTTCTTCAGCTAAGGCGCGCGCCAGATAACTAAAAAAAAATATAGTTGCTGCTTAAAAAACAA  
TACACCG

TTTCATATATAATGAGTCATTTGTTTCTGTGCATCACTTTTCTATACTTTCTCTTCCCCGCGTGTTTTCCGT  
ACACCAACAATATATGCCATAATACACGTAACATTTTTTTATAAAAAGAAAAGGTAAGTGATATATATAAA  
ATAGCGCC

CTAATTTTTTCTTCCCACGTCCGCGGGAATCTGTGTATATTACTGCATCTAGATATATGTTATCTTATCT  
TGGCGCGTACATTTAATTTTCAACGTATTCTATAAGAAATTGCGGGAGTTTTTTTTCATGTAGATGATACTG  
ACTGCACG

TAAGAAGTAGTATTCTATTATTATAACTATATTAATAAAAAATTTTATTTTCTATTGAAAACCAATTTTTT  
ACACCAAATATCAGACACGCTTTGTCTATTTCTATCATATAGCGACTGTGATATAATGCGCGCGTGTTTTG  
AACGGCAT

GAATGTACCTAAGCCAAAAAAAAAAAAAAAAAAAAAAAAAAAAAAAAAGAAACAGCTTTTGCATATTCAATCC  
AGGCATAGGGCGACTATTTAGCACTCAACGATTTTTAAGCTTGTGTATTGCTGACATAAATTCCGGCTTTA  
GAATCCAA

GAAAAACGAAATAAAGAAGAAAGATTATTATTATTAGTTACTTTTTTTATTGTACTCCAGTATGGACCTCT  
TAGGTGAGTGATCTTATTAATAAAAAAAAAAAAAAAAAATGAAAAAAAAAGAAAATTAAAAACTA  
AACAAATT

TTAACAAAATACATATAAGTAAATAATGCTAAATAAAAAAGCAAAAAATAAAATTTATATCACACTTGTA  
AAACCTTTAAATGATCTTCTTTTTTACCTGTTTTATTCACTTGTTTTTTTTTTCTGAGTTGTTGCGCCTT  
GGAAGAAT

CATTTTTTCTCATTTACTTTGTTATTAATTTTTTTTTTCAAGTTCTCCACATATACATATGTAAGAATTGA  
GTCTATCTCTTTCTAATATTTAAGAAATACATAAAAAACCAATTTTTTTTTTTTATTACTAGCAAATTTA  
TTTTTGTG

ATGGTTATCTGCGATGAGATGAGTTTAAAATTTTCATTTTTTAGCCGATCAAGCAAAAGAAAAGAAAAAA  
AAAAAACTGAAATTTCCACCTTACCCGTTTTTTTTAATGGAACAGTGATTGTTACGACATTGAGATTTTGA  
ATTTATAT

TTTGACGACTAAATAATAACATAACCACTACGTTCACTTCCCCGTATATATACATATATACTTAATATTAT  
AAACGCATATACTTTTATAAACTTGAATAAGTATTATATATTTATTTTGACCATCCGGAAATGCTTTATT  
TTACACTT

AGGATCGAAAAATATCAAAAACATAAATCAGAAAAGGGGATCAAGGGGTTTTTTCATAGAATTTTCGATTA  
AGTGGCATAGCAACATTTAGTTTCGCAATGCGTTTACTTCAGAATCATTCTTTTTTTTTTTTTTTTTTTTT  
TTTGCCTC

GAAAGTATATATAAATTTGGGGTACCTGCAATCTTTATTTATTTTATTTGAAGTAATAGGAATTATTTATA  
TTATTGTGATAAGAAGTAGTATTCTATTATTATAACTATATTAATAAAAAATTTTATTTTCTATTGAAAAC  
CAATTTTT

TGTTTTTTTTTTTTTAATGCAGATGTACGTACATATTTTCTTTATCAAAGGATGTGTAGAGAACTATGTAT  
ATATGTATATGTGTAGGTTTTTTTTTTTTTAGGATGACTAGAAAAGGAAATCGAAAAAGAAAAATAAGCAT  
GAATCATG

GAGTTTAAAATTTTCATTTTTTAGCCGATCAAGCAAAAGAAAAGAAAAAAAAAAAAAAAAACTGAAATTTCCAC  
CTTACCCGTTTTTTTTAATGGAACAGTGATTGTTACGACATTGAGATTTTAGATTTATATAATCACATACAT  
ATTAATA

AATATCAAAAACATAAATCAGAAAAGGGGATCAAGGGGTTTTTTCATAGAATTTTCGATTAAGTGGCATAG  
CAACATTTAGTTTCGCAATGCGTTTACTTCAGAATCATTCTTTTTTTTTTTTTTTTTTTTTTTTTTGCCTCAC  
ATTATATT



AATTGAAATATGATAAAAAACCCAAACATATTTAAAAAACCCAGACATAAAGAAAAAACTTTGAAAAAAA  
GTATTATGCCGCTGAGCGCGCCACGTTAAAAGCTCGAATTCTTCGCATTGGTAGTAGCGCAAAGTCCAATG  
AGCGCACC

TTTGACATATATATAGCTCGCAGTAGAAGAATGCAGCGTAACATAATATAATATAATATAGTACGGCGCCG  
CCCTCCATTAGAACGCGCAACACAATAAAGACAAATAAAGAATCAGCTATAAAGCTGGCCATTGCATGGT  
TCGCGCTG

ATAAATTTGGGGTACCTGCAATCTTTATTTATTTTATTTGAAGTAATAGGAATTATTTATATTATTGTGAT  
AAGAAGTAGTATTCTATTATTATAACTATATTAATAAAAAATTTTATTTTCTATTGAAAACCAATTTTTTA  
CACCAAT

TTTTTTTTTTTTTTTTTTTTTTTTTTTTTTGCCTCACATTATATTCTTGGCATCTGCCTAGCTTTTCGACTTTTTCG  
TTCAATTCCTAAAGCGCTAAAAAATAGTCTCCCCCTGAAAGTGGAGTAGGATAGTAGTATATGAAGTGAG  
GCAGAAAA

CGTGATGATACCAAGAAGTAGTAAAAGCTCATGGCTTCTTATATATTATATATGGAATACATTTATAATAA  
AATAATAAGAATTATATATTTTTATGATTATATTATTACATAAAGTATTCCCCATTATAAATTCTGAGTTTC  
GTATTTAA

TTTATAATGTATAATATACCCGAATCTTATTTATTTTACCTTTTCTATTTTTTTGACGACCAGTAAATACTAA  
TACATAAATTAGGAACAAAAGTTAAATAAAAAAAAAAATAATAATTTAACGCATCCAATTAACGTGTCCTTT  
TTTCATCA

TGGCTTACTGCATCTCTTCAAAATTTACAGTCATGCTCACCTTAAGTTCTCAACCTTTTAGTTTTTTTT  
TTTTTTTTTTTTTTTTTTTTTTGATGGCATACTAACTATACAAATATTTATATGTACATTTATACAGTAACCTA  
TTATTTAC

TGTTCTATTTCTTGAGGTGATTTCAAATTTGGGCTCCAACAAGTAATCTCGGCAAGCTATCCCTTTTTAAA  
TAATATTTTGCATTCTTTTTCTTTTTTTTTTTTTTTTTTTTCCATCTCACAGCCCTTCTTTATTTTTTTCAA  
TAAGGTAA

CGTCAGTTTTCTTCAGCTAAGGCGCGCGCCAGATAACTAAAAAAATATAGTTGCTGCTTAAAAACA  
ATACACCCGTAATCTCTTGCCTGTAAAAACCTCGAAGGACCAAAGATACCCTCAAGGTTCTCATCTGTGCG  
GTATTTCTT

ACAACCTAATTATATAGAATTTAATAAAGACAAATGCAAAAGTTTTTTTTAAAGTATGGATGTATAATAATA  
ATAACGATAATACGAACACTATTGGGACTAATAATGATTTATAGTTTTTTTTTACACAGGGGATTTAACGTT  
CCGCGACC

TATTCTTTTCAATTTCAACATACTCGAAAAGGAAGCACTAAAAGTACTTACATTTTACATGTATGTAT  
ACCTATATATATATATATATATATACTCTTATAGATATATTTACAAATTAAGGAAAAAATAATAAATAAC  
TCCCTGTC

CTGATTTTACTTTTTTTCGGAATTACCTAAAATGGGTTTACGGCATAGAAGATAGATAGATTAAGAGGTAGG  
TTGACTTTTTCTTTGAAATTTGTAATTTTAATAAAAAATTTCAAAAAAAAAAAAAAAAAAATTTCAAAGTAAAA  
AGACAAAC

AAGACACAGGTCGTTCTAACGTTGGTAAAATGAAAAATATGAAAAACAGTTATCATGGCTACTATAATAAC  
AATAATAATAATAATAATAATAACAATAATAATAACAGTAATGCTACCAACAGCAACAGCGCGGAAAA  
ACAACGTA

ATTTTATTTTCTCTCATGAGAAAACAGAATTTTCGAAACAGATATAATAAAAAAATTTGAAAAATTTGAA  
AAAAAAAATCTAGAAACATATTTTCTAAAATGAAAATCGGAAGCTAACAAAATTTTTGAAAAACGAAAT  
AAAGAAGA

ACATATAAGTAAATAATGCTAAATAAAAAAGCAAAAAATAAAATTTATATCACACTTGTAAAACCTTTAA  
ATGATCTTCTTTTTTACCTGTTTTATTCACTTGTTTTTTTTTTCTGAGTTGTTGCGCCTTGAAGAATGG  
AAAAGCAA

GAAGTAGGAAAACCTGACATTAGAAAAAGAAAAAAAAAACAATCTGCGAATTATGCATTTCTTTTTTCGCT  
TTTTTATTTTCTTTTTTCTTTTTTTCGACCTCCAATAGGGCTTTGGAAGCCCTATATGTAATCTAGGGTAA  
TGACATAT

TGTGTATAAAAAGAGAGAAAAAATGGTTATTTTCCAATTAATTAATTATTAACGATTGTTAAAGAAAAAATT  
TATCAACGAGGTTGATAGAAAAAAAAGTTTTTGTAGATATAGAAGAAAAAAGATTTTCACTATTGGTGT  
TATAGGAA

ACTTATTCAGCTTTATTTTAAACATTATACAAGTTTTTCATTTTGAGGGTCTTTAACTGGAAAAAAAAG  
CTTTCACGACTCAAAGAAAAAAAATTTTTTTAGGGTAAAAAAAACCTAAGGGCTAATATGAAAAAT  
ACAAAGGT

AAAAACGCGAAGAATACGCGTTGGTCGTTAAATTTTGTGGTACGCGTAAAACCTGCTATTTGGTATCCTCT  
TTAGGGACGCGCCATTGTCTATACGGTAATATAGGGCTTTCTTCATTACCTGCTTGCCTCAATTAGCTTT  
ACTCATGT

TTTTTATTTTTTTTTTTTTCGCGGAACTTTGCTATATTGGGTAACGCGTAAAATACTTTTTATTATTGCAGT  
AAGGCGAAGGGTCTTCCCCTTTCATGTTAAATAGCATAACATGGCACCCTCAGGTCCAGAACGTGACAC  
ATCTTTGC

CGTTCAAGAATGGGAGGTATTGGGACGGGTGGACGTTTAAAGCATAACATTTATGTGCACTGTAAGTAATTAT  
ATAGAATTTTTTTTTTTTTTTTTTTTTTTCATATCTGTCAATACTTGAAAATGTTCTAGTTAGAGATTTACG  
TATACTGA

AAATTCTCGGCTTAGGCATCGAACGATGAAGAACTAACTAAAAATATACGCCATTTTTTTGGGGAGGGGG  
GGCCGCACTGAAACGCGAAATGCCAAAAAACGCGAAACGCCGAGTAAAAGGTGAGTACCAGCGCAAAAAA  
TACAAAAA

AAATGCGAGATCTCGACCAAAAAAGGGGGTAGGGTAATAAAATTAACCCTATTATTTTTTTAACTTTAAAA  
CCTATAATGTGCTAATATTTTATTATAAACCTCCTTTTTTTGCGTTCAAACCCTGACACATTTTAAGCCCT  
ATATTTAC

GAGTGAATTTCCGTCCACGAAAAAATGTTAACATAAAATGCAAGAGAACAATTAATCGAATAATGTTAAAT  
TATTGTAAAACAATGTGTATGATGAGGAGGAATGTACCTAAGCCAAAAAAAAAAAAAAAAAAAAAAAAAAAA  
AAAAGAAA

TTGTTCAATACTGGACAATTGTTCTGATATATATATATATATAATTTTCAATGAAAAAAAAAAAAAAAAAAA  
GAAAGAAATTAGAAGCTAGAAAGAAATAAGGAAAAGGAAAAGCAAACAACAATAGGAAAAAAAAAGCATAG  
AAACATAT

TTTTTTTTCAAGTTCTCCACATATACATATGTAAGAATTGAGTCTATCTCTTTCTAATATTTAAGAAATAC  
ATAAAAAACCAATTTTTTTTTTTTATTACTAGCAAATTTATTTTTGTGAAGTGAAATTCATACATTGGCT  
TATTAAG

AAGAATTTAATAATGAAGATGGGAATAAGCAAAACAAAAAAGGAAAAAATAAAAAATCGTAT  
TTATTTATTTAAAAAATCATGTTGATGACGACAATGGAAAAAAAACCGATTTCACTTTCTCATCCTTAT  
ATTTTTCA

CTATTGCGGAACTGCAGCATAGTCAGTGAATAATCGTACTGTTGCTTTTTTCATTTTTTTTTTTTTTTTT  
TTTTTTCTCATATAGAAAACCTGTTATTGAATGTTTTGACTAGTCTCATGAAATAAACATTAATAGTTACT  
AAAGGGTT

CAACAGCCATTCCACAGATAGTGCTACTTTAGTAAACGTTACATCAAAAAGGTAGTATTAATTAATAAAAAA  
AAAAAGCCAATAATTTTCGCGCAAGCTTTGCTCTACATAATAAAAATACAATTAGGATAGAAATGAATATT  
TTTTTAGC

TTTTTTTCATTTTAGTATTTTATTCTTCGTTATTTATGTATAGAAATTTTCATTTTCATTTAGATTAGAT  
TTGGTTATCTTTTTTCATTATATATCTTTTGCCTAAGTTTCAACTTAAGTTCTATTTTTTATTTTTTTTT  
TCTGGGCC

ATATTCAACATACTCGAAAAGGAAGAACTAAAAGTACTTACATTTTACATGTATGTATACCTATATAT  
ATATATATATACTCTTATAGATATATTTACAAATTAAGGAAAAAATAATAAAATAACCTCCCTGTCAC  
AAGTTAA

GTTTTTTTAGTGGTAGAACGTTCTATCTGTTAAGCGTGTATGGTTATCTGCGATGAGATGAGTTTAAAT  
TTTCATTTTTTAGCCGATCAAGCAAAAAGAAAAGAAAAAAAAAAAAAACTGAAATTTCCACCTTACCCGTTT  
TTTTAATG

TGTCATAATAAATATAAAAAAACTGTAGTTTCTTTTTAAATTTTTCTACTTAAGTTTAGTTATACTGTA  
CCTAGGTATATATAAATATATATAAATAAAAGTGGCCAAGAATAAAAGAACGCACCCCGTCTGGACTTAG  
AAGTCATC

TTTTCTTTATACAAAATATATAGGTACCAAACCTCATTATAATTTCTGCCATTTAATAGTTAAGATGCTA  
TTCCGTTTCGTATTTTTTCAATTTTTTATACCTACTATTGCGCGAAATCAAATAGCATACTAAGAAAAAGC  
AATATCAT

AAAAAGGCAATTTCGCGTACAATTTTCGTTGATCGTTCTTTATATAACCTTTGCATTAAATAAATTTAACAA  
AAAAAGTTCTTTCTAAAATAATATTATGGTGATACATGAATGTGCTTTAGTTTTTTCGTAGGCTCATCCAT  
GTATATAT

ACAATACAATGTGAGACTAAAGTAAATCCGGGTAATACAAAATACAATTTTTTTTTTATTCTTACAGCGTT  
TTTTTCGACGGAGGAGGAAAAAAATTTGATTTAAGGCATCAAATGCGCGACATCATATACCTTTGTC  
CGCTGTTA

AAAATGAAGCCTAAGTATCAGCTAATTGAAGTTTTTTTTGATCACTCCAATAGGCAATCTATAGATATA  
TAAAAAATATAGACAAGACTTTTTTTTTTACATTGCCAGTTTTCTTTTTTCTTTTTTAGTATCTATTCAAATG  
GGCGACCC

TGTGGCTCAAAAAGATCTGTTTTTGTATTAGCAATTTTTTATTTCCCTTTTTTAAATGAATTTTTTTTTCTTT  
CTGTTTCGAGACAAGGCCTTTTGCAAAAAAAAAAAAAAGTAAAAAGTGAATTTGATAGTGTAAAGGGGACA  
GAGGTGGG

AACGAGCTAAGAAATAGTACACAGGGCAAGGTCATTAATAGCGTATATAATCATTTAATATAGTATGTTT  
TCGAAGCTGATCGCGTAAGGCGCAGAGCGAACTAAAAAAATACCGGCACCCATGCACCTCACACCGCCG  
ACGCGAGT

GGATGCGCTTCAAGAATAGAAGCAAAAAGTCCGGTTAAAATTGAAATATGATAAAAACCCAAACATATT  
AAAAAACCAGACATAAAGAAAAAACTTTGAAAAAAAGTATTATGCCGCTGAGCGCGCCACGTTAAAA  
GCTCGAAT

CCATAAGTAGCAAAACCCTAACAAATACAATGTGAGACTAAAGTAAATCCGGGTAATACAAAATACAATTTT  
TTTTTATTCTTACAGCGTTTTTTTCGACGGAGGAGGAAAAAAATTTGATTTAAGGCATCAAATGCG  
CGACATCA

CTCGCGAAAGTTTTAATTAATAATTTACTGATAGTTTTTTAATGATGAACTTCTATAACTAAACCATAATAA  
TGAAAATTACAGGTAATATTTATATCACAAGAAACGGCCCTCTTTTCTGTTTTTATATAGTAACCATTAA  
GAATAGTT

AGAAAAAGAAAAAAAAAACAATCTGCGAATTATGCATTTCTTTTTTTCGCTTTTTTATTTTCTTTTTTCTT  
TTTTTCGACCTCCAATAGGGCTTTGGAAGCCCTATATGTAATCTAGGGTAATGACATATGTCACGTGCTTT  
AGGGCTTG

TTAGATCCACATTACTAATTATTGAATATGGACAATAATATCAAATATATTATTATCAAATTGATTATTTT  
GTGACGCGGCGTCAAATTTAATCGCGTCTGACGAATGAGCGGGTAATAAACTGTCTTTTTTTCATGAATG  
AATCGAGC

AATGTTAAAAACTGGTTAAAAATGTCAAAAAATGGTCCGAAAACTGAAAAAATATTTCGTGATACAGTTTGC  
ATAAAAAAAACTATTGTGCGGATTAATATAACCTACTAGACTTAAATGACGACACTTTAATATGAAGTT  
CAGTAGTG

ATTTTAGTTAGGAACTTTGGCATAATTTTTCAGTATTACATACTACCTAATCGACATAAAATAATATTACATA  
TTCATTTTTTTAAAAAATAATCATAATCAATTTATCCTTTTTTATTCTTTTTTCTCTGTGCAAGTTGAT  
GGTGATGT

CTAAACTCGAAAAAAAAAATTGAAAAATTGGAAAAAGCGAGAGGTTACTGAAAATTGTGAAGAGATTCCC  
GGGTAAATATAAACATAATTAATACAATAATAGCAATATATGTGACGAACGTGTGTTCTACTTTTTAGTATT  
TACAGGTA

ATAGTTTTACCTTAAACACATCTCCTTTTTAAAACCTATTGTAAATTATTTCATTAGAATTTTTTATATTTAAT  
TAATCTATCCTTTTTACTAATGAAAAATTCTTTAAATAAAAAAATCTATACATCCACTAGAAAGTATATAT  
AAATTTGG

TCGCGATGGTTAATGCTTTGTATTTCGCGCTATCTCGATTTCTACCTATATAGTTAATCTCTGTACAAAAAC  
AATCTTTCCAATATCCATTAATCATAGTATATTATCAGCGTCGGCGATTTTACCACGCTTGACAAAAGCC  
GCGGGCGG

CCGTGCGTGAGGGGGGCGCGGCCATTTCGGTTTTTGCAATATGACCTGTGGGCCAAAAATCGAAAAAAAAA  
AAATAAGAGGCGGCTGCGGAATTTTATAAGACAAGCGCAGGGCCAAAGAAAAAATAATAATTGACGTGGCT  
GAACAACA

AATTTTCGAAACAGATATAATAAAAAAATTGAAAAAATTGAAAAAAAAAATCTAGAAACATATTTTCTTAA  
AATGAAAATCGGAAGCTAACAAAATTTTTGAAAAACGAAATAAAGAAGAAAGATTATTATTATTAGTTACT  
TTTTTTAT

AATTA AAAACTAAACAAATTTTATGACAGGAATAAAAACTATAAAAAATGAAAAGCAAAAAAAAAAAGGCT  
ACTGGATTTTTAACATCTTGTCTTTTTCTTTCCCTTTATCATTTTTTCTCATTTACTTTGTTATTAATTTT  
TTTTTTCA

TGATAAAAACCCAAACATATTA AAAAACCCAGACATAAAGAAAAAACTTTGAAAAAAAAAGTATTATGCC  
GCTGAGCGCGCCACGTTAAAGCTCGAATTTCTTCGATTGGTAGTAGCGCAAAGTCCAATGAGCGCACCTC  
AAGTGAGA

AGGGTAGTAGTAAGAGCTTACGGAACAGCCC GAAAGGCTGTAAAAGTTTAAATATACTTACTGTTCTTGAAA  
TTCTGTCTATATACTTGACTATTTAAAGTTACTATCTTTGGATTTGAACCTTATAAAAAAAAAAAAAAAG  
GTACATGC

AAAGCTAAACGGGTTTTTTCAGAATCCTCTTACCCAGCCTTGGATAATAGTTTTGGCCGAAAAAAAAAAAA  
GAAAGAAAAAATTGAAATTTTCGCGATCCGAACAAACAATGAACAGAAAAACAGAATATATATAACGCTGC  
CAAGCCTA

CAGGAAAGTGCAGAAAGTTTATTAGAAATCAACGATGATCTGATATACATATATATATATATATATATATA  
TATATATAAAGTTTATTAATAGCCTTCGAACAACCTCATCTATCTGTGCGATGACGTTAATATGAAGTATTT  
CTCCTTTT



ATTCTGCTTCTTTGTTTAAATGGTGTAAAGCTGCCTATATGTTACTATTGAGTACTCATCTCATCGCTTCTTT  
CAGAACAAAATTTTTTCATATTTTTTTTTTTTTTTCTTTTTTTTTTTTTTTTTTTTTTTTTTTTTTTTTTTTTTTTT  
TTTATATT

TTATTTCTTTCTCACATACTTTATAAAAAAGATAATTTTTTTTAAAAAATAACAAGTGGAAACA  
TTATCAAATAAAAAGCATTATAGCGCCACATGCGATGAACCTGAGCTTTTATCTTCATTAATATATAGTAA  
TTACAACA

TTTTTGATACAGGGCGCTATGATTTTAGTACAAGCAGCTTTAGGTTACGTGTACCTATTTCTAGTTGAATT  
TTCTCTCTATGAAATAGTCTATAAATTTATATAAATCTATTTTTTTTTTTTTTTTTTTTTTTTTTTTTTTTT  
TTTTCTTGG

TCCCCATCTATCCTTCGCCTCTCCTTCGCTCTGTAATTTTTTTTTACTCGCGCGCTTCCGACTTTTGAAAGA  
AGGAGCAATAAAGTTAAATAAATGTAATTAATATGCTTTTTTTAGGCAAGTTCGGGACTTTGTTGCCACG  
TATTGCTC

AATAAACTTTTCGAAAAATTTTTATTTATGATAATTTTACTAATTCTTACTTATTTCTTTTATATTCGATA  
AAAAAATTCAAAATAAAAAAAGATTAATCCTTTGATAGGAACTAAAGGTACTAGGTATTTTGGGCGGCGA  
AGCATCAT

CAGTTTTTCATTTTTTTTTTTTTTTTTTTCGTTATATAGGTTCTGCGCATGTGAAAAAAGAGAAGAAAATAAAGCC  
AATTATAAGTCATTACTGACGAAATTATAAGATAAATTAGAGGTACAATATACAACTAGTGAATAACAGA  
ACTATATA

TCCCCAAATATTGAGGGTTTTGTTTTTTTTTTTTTAAATGCAGATGTACGTACATATTTTCTTTATCAAAGG  
ATGTGTAGAGAACTATGTATATATGTATATGTGTAGGTTTTTTTTTTTTTTAGGATGACTAGAAAAGGAAATC  
GAAAAAGA

TCCCAATTTTTTTGACGACTAAATAATAACATAACCACTACGTTCACTTCCCCGTATATATACATATATAC  
TTAATATTATAAACGCATATACTTTTATAAACTTGAATAAGTATTATATATTTATTTTTGACCATCCGGAA  
ATGCTTTA

TCCTTTTTTTTTTTTTTTACTTTGTTTGACCTCCCCTAACTCTTTCTTTTTACCTTCACAATTGTTTATTTT  
AATATATGATTTTTTAAATTAATTCAGGTTAATTCATAAACTATATTGCAATCTTTTAAATATATGTATAC  
ACGTTTCAT

TGTGCATACTGATATATGTTCTATTTTACCCATTTGAGGGGCCTAAATTGTCTATTAATTTTTTTACTTTA  
ATACAGTTTGTATAGAAACATGTGGCACTAACAGCTTTATCCGCCCGCAGAAAAGATAAAAAAAGGGTT  
TTTACCCG

ATACCAAATATTTTCAAATCCTACTCAATAAAAAATTAATGAATAAATTAGTGTGTGTGCATTATATATAT  
TAAAAATTAAGAATTAGACTAAATAAAGTGTCTAAAAAATATTAAGTTGAAATGTGCGTGTGTGAA  
TTGTGCTC

CGACGTTATATAAATTGTTGTGATATTTGCATCTTCATCTTATGATGATGAGAATATAAATAATTTTTAATC  
GTATTAAGTGTATATATGAATAAGCTATTAACCCTACCATTAATTTCCGGGCGGGTTGTTATTTTTATCA  
GTATTGGC

CTCATTTTCACTAACTCGAAAAAATAAATTTGAAAAATTTGAAAAAGCGAGAGGTACTGAAAATTGTGA  
AGAGATTTCCCGGTAAATATAAACATAATTAATACAATAATAGCAATATATGTGACGAACTGTGTTCTACT  
TTTTAGTA

TTTTTACCATTGGGATTGTTCTTGATGCGATCAAAAATATGATTTTTTTTTATCATACCTGATACTTCGCGA  
AAACCTTAGAATAGCAAATAAGGCCATCGCAACATTAATAGACAAAATTAGAGTCACTTCACTTCGTTGA  
TTTTTGAT

CTTTTGAATGTGTGTATAAAAAGAGAGAAAAAATGGTTATTTTCCAATTAATTAATTATTAACGATTGTTAA  
AGAAAAAATTTATCAACGAGGTTGATAGAAAAAAGTTTTTGTAGATATAGAAGAAAAAAGATTTTCA  
CTATTGGT

GCAACATTTAGTTCGCAATGCGTTTACTTCAGAATCATTCTTTTTTTTTTTTTTTTTTTTTTTTTTTGCCTCA  
CATTATATTCTTGGCATCTGCCTAGCTTTTCGACTTTTTCGTTCAATTCCTAAAGCGCTAAAAAATAGTCT  
CCCCCTGA

GCCATTTCGGTTTTTTGCAATATGACCTGTGGGCCAAAAATCGAAAAAATAAGAGGCGGCTGCGGA  
ATTTTATAAGACAAGCGCAGGGCCAAAGAAAAAATAATAATTGACGTGGCTGAACAACAGTCTCTCCCCAC  
CCCTTTCC

TTAGTAAAAATAATTACGTGCGCGGTTGCGCGATATTTCCCTTGCTTAATGCCGAAGTAATTCTCTTCGTT  
TACCCATACTCGAATCTATTGTGTTGTTGAAAAATAAAAAAAGAACCAGGTTATATAATTGTGAGTT  
GATCAGTA

TATCCGGTTTTTTTTCTTGTGGACCAATAGGAAAAAATAAAAATAAAGTCACAGAAATTCATGAA  
TATTATAAATTTTCTTGTGTTTCCCTAGTTGTTATTTTTATAAAAAAATTTCTTGTAGACAATAAAAT  
AAGAAATG

GACCTGGTATTATCCGGTTTTTTTTCTTGTGGACCAATAGGAAAAAATAAAAATAAAGTCACAGAA  
ATTCATGAATATTATAAATTTTCTTGTGTTTCCCTAGTTGTTATTTTTATAAAAAAATTTCTTGTAG  
ACAATAAA

GTTCGAAGCTGACCTGGTATTATCCGGTTTTTTTTCTTGTGGACCAATAGGAAAAAATAAAAATAA  
AGTCACAGAAATTCATGAATATTATAAATTTTCTTGTGTTTCCCTAGTTGTTATTTTTATAAAAAA  
ATTCTTGT

ATAATATACCCGAATCTTATTTATTTACCTTTCTATTTTTGACGACCAGTAAATACTAATACATAATTA  
GGAACAAAAGTTAAATAAAAAAATAATAATTTAACGCATCCAATTAACGTGTCCTTTTTTCATCATT  
AATTTATC

TTTTTATTTATTTTTTTTCATTTTAGTATTTTATTCTTCGTTATTTATGTATAGAAATTTTCATTTTCATTT  
AGATTCAGATTTGGTTATCTTTTTTTCATTATATATCTTTTGCCTAAGTTTCAACTTAAGTTCTATTTTTT  
ATTTTTTT

GTATATTATTTTATACGTTTATGTCTATTTCAATGCAATTACGTGAAAAATAAAGAACGCTACCATAAAA  
ATGTTAAAAACTGGTTAAAAATGTCAAAAAATGGTCCGAAAATGAAAAATATTCGTGATACAGTTTGCA  
TAAAAAA

AGTGCATAATAAAAAGTAAAAAATAAATAAATAAATAAATAAATAAATAAATAAATAAATAAATAAATAA  
TATATGTATATGTAGTTAAATGAAGCCAGTTTTTTTTCGTCTGGTTTGTTCAGCCTATATGCCCTCTTTGC  
TTTCTTGC

ACAGCAAACAGTACCTCACGTCTTTTTTTTTGAATAGTTTTTTTTTTTTGTTGAAACAGAAAAAACTTTCT  
TCCGTATATTACATTGTACATTATTTTTATTGTATTTTAGTTTTCCAACGTTAGGATTTGAGCCGTCATTAA  
TATTATTC

TCGCTCGGCGCCATACCGAAAATCCTCAGGAAAGTGTTAGTGTATATATTATATTATATTATATCATATT  
ATATTAAGTTTATTGTATACATAATGGTCATACATCAATAGTGTACATCCTCTCTTCGCTTGTCTCGCAA  
AAATGTTT

GATATTTGCATCTTCATCTTATGATGATGAGAATATAAATAATTTTTAATCGTATTAAGTGTATATATGAA  
TAAGCTATTAACCTACCCATTAATTTCCGGGCGGGTTGTTATTTTTATCAGTATTGGCCTCTGCCGGGCG  
GCTAGCAC



CGCGCAGGCACGCCGCGCATCTCTTTTTCTCGAAGAAAGCGGAAAAATAAAAAACGAAAAATAAAAAAAAA  
AAAAAGTATAAATAGTGAAGACTTTTTCCATTTGATATTTGGTAAAAATTTTCGGCTGGAAGTTTTTTGCTG  
AACATTTA

TTTTTTTTTTTTTTTTTTTTTTTTTTTTTTTTTTTCATTTACTTTTATTTCTCGCGGTTCGGTAAATTTTTTCGTGGGT  
TTCTTTGAATCTATTAGCCGACATAAGAATAATGCATAAATAATATTTTTAATGTCTTCCCTATGCCAAAA  
GAAGAAGT

CTTCCGTCTTCTAAGTTTTTCCTTTTATTAAGGATGCGCGCAATAGAAGACACAGGCAATAATAGAATTTAT  
TAGGGTATTATTGTAAGGATAGGCATTACAAAGATAAAATAAGTTTTTAAAAAAAAAAAAAAAAAAAAAAAA  
AAAAAAGA

TAGCCCCGTTATAGGGAAAATGAAAAAAAAAAAAAAAAATAATAAAAAAAAAAAAAAGACTAAAAAATAGAAGAGC  
ACGGCAACTTAAAAAGAAAAAAAAAAATTTATGATAACTACAAAATAGTAAAGAACCCTGGCAAAAAGAAATA  
AATCCGGT

TGAAGAATGCTGTGTTTCGAACTATAAAGCGTCAGAAAAGATGGTTTAGCGAAGGCACCATTATGAAGATAG  
ACACATTCCTTTTTTTTTTTTTTTTTTTTTTTTTTTTTTTTTTTTTTTTCATTTACTTTTATTTCTCGCGGT  
CGGTAAAT

TCGTAACCGCCGCGCAGGCACGCCGCGCATCTCTTTTTCTCGAAGAAAGCGGAAAAATAAAAAACGAAAA  
TAAAAAAAAAAAAAAAAAGTATAAATAGTGAAGACTTTTTCCATTTGATATTTGGTAAAAATTTTCGGCTGGAAG  
TTTTTTGC

TACATATTCTTTGACGTAATAATATCGGAATAATGCATGCGCATTTCGGGTTAGCCCCGTTATAGGGAAAAT  
GAAAAAAAAAAAAAAAAATAATAAAAAAAAAAAAAAGACTAAAAAATAGAAGAGCACGGCAACTTAAAAAGAAAA  
AAAAATTT

AATATCGGAATAATGCATGCGCATTTCGGGTTAGCCCCGTTATAGGGAAAATGAAAAAAAAAAAAAAAAATAATA  
AAAAAAAAAAGACTAAAAAATAGAAGAGCACGGCAACTTAAAAAGAAAAAAAAAAATTTATGATAACTACA  
AAATAGTA

TTATTCAAAATTATTGGTTTTTCGTAACCGCCGCGCAGGCACGCCGCGCATCTCTTTTTCTCGAAGAAAGCG  
GAAAAATAAAAAACGAAAAATAAAAAAAAAAAAAAAAAAGTATAAATAGTGAAGACTTTTTCCATTTGATATTTG  
GTAAAAAT

TGATTTTAACTTTACGCGGTTGAAGAATGCTGTGTTTCGAACTATAAAGCGTCAGAAAAGATGGTTTAGCGA  
AGGCACCATTATGAAGATAGACACATTCCTTTTTTTTTTTTTTTTTTTTTTTTTTTTTTTTTTTTTTTTCAT  
TTACTTTT

ATAGGGAAAATGAAAAAAAAAAAAAAAAATAATAAAAAAAAAAAAAAGACTAAAAAATAGAAGAGCACGGCAACTT  
AAAAAGAAAAAAAAAAATTTATGATAACTACAAAATAGTAAAGAACCCTGGCAAAAAGAAATAAATCCGGTAA  
GGGAAGAT

TTGACGTAATAATATCGGAATAATGCATGCGCATTTCGGGTTAGCCCCGTTATAGGGAAAATGAAAAAAAA  
AAAATAATAAAAAAAAAAAAAAGACTAAAAAATAGAAGAGCACGGCAACTTAAAAAGAAAAAAAAAAATTTAT  
GATAACTA

ACAGGCAATAATAGAATTTATTAGGGTATTATTGTAAGGATAGGCATTACAAAGATAAAATAAGTTTTTAA  
AAAAAAAAAAAAAAAAAAAAAAAAAAAAAGAAAAATAAAATAAATATGGATGGAAATCATAGGTTTACTCCA  
GATTCCAA

ATAGAATTTATTAGGGTATTATTGTAAGGATAGGCATTACAAAGATAAAATAAGTTTTTAAAAAAAAAAAA  
AAAAAAAAAAAAAAAAAAAAAGAAAAATAAAATAAATATGGATGGAAATCATAGGTTTACTCCAGATTCCAAAG  
AATTTAAT

TTATTGGTTTTTCGTAACCGCCGCGCAGGCACGCCGCGCATCTCTTTTTCTCGAAGAAAGCGGAAAAATAAA  
AACGAAAAATAAAAAAAAAAAAAAGTATAAATAGTGAAGACTTTTTCCATTTGATATTTGGTAAAAATTT  
CGGCTGGA

CGCCGCGCATCTCTTTTTCTCGAAGAAAGCGGAAAAATAAAACGAAAAATAAAAAAAAAAAAAAGTATA  
AATAGTGAAGACTTTTTCCATTTGATATTTGGTAAAAATTTCCGGCTGGAAGTTTTTTGCTGAACATTTAAC  
CGGAGAAT

GTCTTTTTCGCGAATTCGCGTCGCGATTTCGTGGATTGTGATGATAATAGCGATGTCTACTACCCGGGTACGT  
ATTTAATTATCATTATACATTATATGTTATAGGTTAGCGTATCGTTTTAAGGCTTGTGTCTTTTGGGAGC  
ATGGCCTA

TGCAGCATGAATAAGATATAGGTGAGAGCTAGCGATTTGACATTTAGTACATAGATATTTATATATATATA  
TAAGGGAGTTTTTTTTTATTTTTTTTTTCAAATACGAAAATAGCAGTTCACGAGGCACTCACTTACTGGT  
TTTTAAAA

TTAGGGTATTATTGTAAGGATAGGCATTACAAAGATAAAATAAGTTTTTAAAAAAAAAAAAAAAAAAAA  
AAAAAAGAAAAATAAAATAAATATGGATGGAAATCATAGGTTTACTCCAGATTCCAAAGAATTTAATAC  
TGTTGTAA

CAGAACTTGCAGCAGCTGTTAAATTCACAATCAGACCAATTTTTTACTCGACTTTTTATTATATAATAGAT  
TATATATATATATATATATATCTCTTTTGCAGCTAAATGAAAGAAAAAAAAGAAATGGCACATATCAA  
AAATAATC

GACCAGCTGTTAAATTCACAATCAGACCAATTTTTTACTCGACTTTTTATTATATAATAGATTATATATATA  
TATATATATATATCTCTTTTGCAGCTAAATGAAAGAAAAAAAAGAAATGGCACATATCAAAAATAATCAA  
TTCTCTCG

TGAAAAAAAAAAAAATAATAAAAAAAAAAAGACTAAAAAATAGAAGAGCACGGCAACTTAAAAAGAAAA  
AAAAAATTTATGATAACTACAAAATAGTAAAGAACCCTGGCAAAAAGAAATAAATCCGGTAAGGGGAAGATAG  
ACCGGCTT

AATAGAAGACACAGGCAATAATAGAATTTATTAGGGTATTATTGTAAGGATAGGCATTACAAAGATAAAAT  
AAGTTTTTAAAAAAAAAAAAAAAAAAAAAAAAAAAAAGAAAAATAAAATAAATATGGATGGAAATCATAG  
GTTTACTC

AACATTCAAGTGATTTTAACTTTACGCGGTTGAAGAATGCTGTGTTTGAAGTATAAAGCGTCAGAAAAGAT  
GGTTTAGCGAAGGCACCATTATGAAGATAGACACATTCTCTTTTTTTTTTTTTTTTTTTTTTTTTTTTTTT  
TTTTTTTC

ATTGTAAGGATAGGCATTACAAAGATAAAATAAGTTTTTAAAAAAAAAAAAAAAAAAAAAAAAAAAAAGAA  
AAATAAAATAAATATGGATGGAAATCATAGGTTTACTCCAGATTCCAAAGAATTTAATACTGTTGTAAAA  
AGTAAAGA

ATAAGATATAGGTGAGAGCTAGCGATTTGACATTTAGTACATAGATATTTATATATATATATAAGGGAGTT  
TTTTTTTTATTTTTTTTTTCAAATACGAAAATAGCAGTTCACGAGGCACTCACTTACTGGTTTTTAAAGT  
GCACCCCT

AGGGTTTTTTTTCAGTTGGTCAACACTCTTTAGAGGTAAAAAAAAAAAAAAAAAAAAAAAAAAAAAGAGAATTC  
CATGTAATTTACCATGATTCTACGTTTTTGCAAGCAAAAATGAAGATAATCCGAGCGCATGCGAAGTAGTC  
CCTGCCAT

TATTGTTGTTGTCTTTTTCGCGAATTCGCGTCGCGATTTCGTGGATTGTGATGATAATAGCGATGTCTACTAC  
CCGGGTACGTATTTAATTATCATTATACATTATATGTTATAGGTTAGCGTATCGTTTTAAGGCTTGTGTCT  
TTTTGGAA

CAATAATTAACAACAAATTCCAGAACTTGGCACCAGCTGTTAAATTCACAATCAGACCAATTTTTTACTCG  
ACTTTTATTATATAATAGATTATATATATATATATATATATATATATCTCTTTTGCAGCTAAATGAAAGAAAAA  
AAAGAAAT

AAAAAAAAAGAAAAATTGTATGTATAATGCTTGTCACTTTTTTTATAATTGATATATGTATATGTATATGT  
ATACATACATATATATAGTTGATTTAGAATTTATTTATATTAACAAAAGACGAAGAGAGGGCAGATAACA  
ATATTTAA

TGTGTATACCATGTACAATTGCTAAATGCTCATTGATTAATTTTAAATTTTTTCATTTTTTATCGCCTTAGAC  
GAAATTGAAATTTTTTCACTGAAAAAAAAAAAAAAAAAAAAAGTAGACGAAGAAGCTCATCTCATCGCGATAT  
TAGTTCGA

TCTTTGTTTTTTTTTCTTTTATTGTTGTTGTCTTTTTCGCGAATTCGCGTCGCGATTTCGTGGATTGTGATG  
ATAATAGCGATGTCTACTACCCGGGTACGTATTTAATTATCATTTATACATTATATGTTATAGGTTAGCGT  
ATCGTTTT

TTTTTTGTCTATTCGTTGTTTTCTTCTCTATGGAAATCGTCGAAAATTTCTTTGTTTTTTTTTTTTCTTT  
ATTGTTGTTGTCTTTTTCGCGAATTCGCGTCGCGATTTCGTGGATTGTGATGATAATAGCGATGTCTACTACC  
CGGGTACG

TTTTTTTTTTTTTTTTTTTTTCAATTTACTTTTTATTTCTCGCGGTTCGGTAAATTTTTTCGTGGGTTTTCTTTGAAT  
CTATTAGCCGACATAAGAATAATGCATAAATAATTTTTTAAATGTCTTCTATGCCAAAAGAAGAAGTCT  
TGAAGTTG

TACTTTTTTTTTTATCATCACTAGCTTTCGGCTAAGCCCTTGCATTTTCAATATTCAATTACCAAATAATATA  
TATATATATATATATATATATGTATGTATGGTATACCTTGTGTTACTGATGTGTTTTTTGTTGACGTCATCCT  
TTTGATTT

AGTGCTTCTTTTATTCAAATTTATTGGTTTTTCGTAACCGCCGCGCAGGCACGCCGCGCATCTCTTTTTCTC  
GAAGAAAGCGGAAAAATAAAAAACGAAAAATAAAAAAAAAAAAAAGTATAAATAGTGAAGACTTTTTCCAT  
TTGATATT

AAAGATAAAATAAGTTTTTAAAAAAAAAAAAAAAAAAAAAAAAAAAAAGAAAAATAAAATATGGAT  
GGAAATCATAGGTTTACTCCAGATTCCAAAGAATTTAATACTGTTGTAAAAAGTAAAGAGTCTTCCACTGG  
CAGAAATC

TATGTGGTATTACTTTTTTTTTTATCATCACTAGCTTTCGGCTAAGCCCTTGCATTTTCAATATTCAATTACC  
AAATAATATATATATATATATATATATATATATGTATGTATGGTATACCTTGTGTTACTGATGTGTTTTTTGTTG  
ACGTCATC

TGATGGCGGGTATGAAGCAGGTTTTTTTTTTTTGGCTTTTTCTTCTAAGAAAAATTTATAGAGAAAAGAT  
GTCTTTAATTATAACCTATTCTTTTTTTTTTTTTGCGAGCTAATACCAGTAAGTTTTGTTTTTTTTGCGACACT  
AGATTGGA

TTTTTTCTTTTATTGTTGTTGTCTTTTTCGCGAATTCGCGTCGCGATTTCGTGGATTGTGATGATAATAGCGA  
TGTCTACTACCCGGGTACGTATTTAATTATCATTTATACATTATATGTTATAGGTTAGCGTATCGTTTTAA  
GGCTTGTG

TAGGCATTACAAAGATAAAATAAGTTTTTAAAAAAAAAAAAAAAAAAAAAAAAAAAAAGAAAAATAAAAT  
AAATATGGATGGAAATCATAGGTTTACTCCAGATTCCAAAGAATTTAATACTGTTGTAAAAAGTAAAGAGT  
CTTCCACT

TTTTACCACTACAGTAAATACTTCTGATAAGAACGGCATGAATAATCAAGTAGGTTTTATAATACTGGTAT  
ACATTAATATAATCAACTATTTATACTATCAAAAAAAAAAAGCTTTTTTTTTTTTTGTTTTTTTTAAGTTTTAT  
GGAATTTT

ATCACTCTTTTAGATAGACCTCTACAGCTTTTACATAATGGCACCAGTAATAAATGATGAACGATTTTCGTT  
ACCCTCGGTAAAACCGGCCAAAAAAAAAAAAAAAAAAAAAAAAAAAAAAAAAATGTTCTCAAAGTGAACTTAATCA  
AAAGCTTA

ACAGTAAATACTTCTGATAAGAACGGCATGAATAATCAAGTAGGTTTTATAACTGGTATACATTAATAT  
AATCAACTATTTATACTATCAAAAAAAAAAAGCTTTTTTTTTTTTTGTTTTTTTTAAGTTTTATGGAATTTTCA  
TCGTAAAG

CTATAAGATTTGATGGCGGTATGAAGCAGGTTTTTTTTTTTTGGCTTTTTCTTCTAAGAAAAATTTATA  
GAGAAAAGATGTCTTTAATTATAACCTATTCTTTTTTTTTTTGGCAGCTAATACCAGTAAGTTTTGTTTT  
TTGCGACA

TAGCGCGCGCTCGCGGATTAACAAGGTAACAATGGTTAAAGGAAAAATTTATTTGTTAAGGTGGGTATATT  
ATAGATTGCTAATTGTAAAGTATTAATAGTTTATTAAGTATTAAGTATTAAGTATTAAGTATTAAGTATTAAG  
TTTGTTC

TAAGTTTTTAAAAAAAAAAAAAAAAAAAAAAAAAAAAAAAAAAGAAAAATAAAAAATAAATATGGATGGAAATCATA  
GGTTTACTCCAGATTCCAAAGAATTTAATACTGTTGTAAAAAGTAAAGAGTCTTCCACTGGCAGAAATCCG  
TATCAGAC

TAAATTCACAATCAGACCAATTTTTTACTCGACTTTTTATTATATAATAGATTATATATATATATATATATA  
TATCTCTTTTGCAGCTAAATGAAAGAAAAAAAAAAGAAATGGCACATATCAAAAATAATCAATTCTCTCGTC  
TTCACACT

TGTTCTCTACAGTGCTTCTTTTATTCAAATTTATTGGTTTTCGTAACCGCCGCGCAGGCACGCCGCGCATC  
TCTTTTTCTCGAAGAAAGCGGAAAAATAAAAAACGAAAAATAAAAAAAAAAAAAAAAAAGTATAAATAGTGAAGA  
CTTTTTCC

ATTGTATGAAATCACTCTTTTAGATAGACCTCTACAGCTTTTACATAATGGCACCAGTAATAAATGATGAA  
CGATTTTCGTTACCCTCGGTAAAACCGGCCAAAAAAAAAAAAAAAAAAAAAAAAAAAAAAAAAATGTTCTCAAAGTGTA  
AACTTAAT

AGGCACTATATTTTACCCTACAGTAAATACTTCTGATAAGAACGGCATGAATAATCAAGTAGGTTTTATA  
ATACTGGTATACATTAATATAATCAACTATTTATACTATCAAAAAAAAAAAGCTTTTTTTTTTTTTGTTTTTT  
TAAGTTTT

CCATTGAGGTTGCAGCATGAATAAGATATAGGTGAGAGCTAGCGATTTGACATTTAGTACATAGATATTTA  
TATATATATATAAGGGAGTTTTTTTTTTATTTTTTTTTTCAAATACGAAAATAGCAGTTCACGAGGCACTC  
ACTTACTG

CAATTTAGCGTCTTTTTTTTTTTGCGTTGGTTTTTCCAATTTGTTTTCGTCGGTTATTATTTTTCAATAAA  
AATAAATAAGAAAATGAGAAAAAATGAAAAATGAAAAAATACTGATGGCCTAGATATGTTTGGGT  
GTTTTCTT

GTCACAATTTCTGTGTATACCATGTACAATTGCTAAATGCTCATTGATTAATTTAAATTTTTTCAATTTTTAT  
CGCCTTAGACGAAATTTGAAATTTTCACTGAAAAAAAAAAAAAAAAAAGTAGACGAAGAAGTCTCATCTC  
ATCGCGAT

CAACAAATTCAGAACTTGGCACCAGCTGTTAAATTCACAATCAGACCAATTTTTTACTCGACTTTTTATTA  
TATAATAGATTATATATATATATATATATATATCTCTTTTGCAGCTAAATGAAAGAAAAAAAAAAGAAATGG  
CACATATC

TACCGCAATAAAATGGACCCTTGTGGTACGTCGAGCAAAAATACTATTGCCGCCGACGGCCGTAGATAAT  
AACAAAGGAATAAAAAAAAAAAGCGGTAACCTCGCGGAAGCATTGCCGATGCTTACCGAGATTTGCCGCGG  
ATAACCGA

TCGAAAAATTTCTTTGTTTTTTTTTTTCCCTTTATTGTTGTTGTCTTTTCGCGAATTCGCGTCGCGATTTCGTG  
GATTGTGATGATAATAGCGATGTCTACTACCCGGGTACGTATTTAATTATCATTATACATTATATGTTAT  
AGGTTAGC

CCGCAATTTTGAGAATATTCCTTTTTTTTTTACCGGATTAATAAAAAAAAAAAAAAAAAAATTCTGTTATAGATGCA  
CATCATATCTCTCTCCTTTTTTCCCGCTTTTATATATTCGTTTCGTATTAGTCACAACAAAAACCAAAGAAT  
ACTCGAAA

TCTTTTTTTTTTTTGCCTTGGTTTTTCCAATTTGTTTGCCTCGGTTATTATTTTTTCAATAAAAAATAAATAAG  
AAAATGAGAAAAAATGAAAAATGAAAAAATAAATCTGATGGCCTAGATATGTTTGGGTGTTTTCTTCA  
TAATACTA

CGCTTTCCCTCCGCAATTTTGAGAATATTCCTTTTTTTTTTACCGGATTAATAAAAAAAAAAAAAAAAAAATTCTGT  
TATAGATGCACATCATATCTCTCTCCTTTTTTCCCGCTTTTATATATTCGTTTCGTATTAGTCACAACAAAA  
CCAAAAGA

CAGTTGGTCAACACTCTTTAGAGGTAAAAAAAAAAAAAAAAAAAAAAAAAAGAGAATTTCTTCATGTAATTT  
ACCATGATTCTACGTTTTTGAAGCAAAAAATGAAGATAATCCGAGCGCATGCGAAGTAGTCCCTGCCATGC  
CGTTTCGG

TAGATAGACCTCTACAGCTTTTACATAATGGCACCAGTAATAAATGATGAACGATTTTCGTTACCCTCGGTA  
AAACCGGCCAAAAAAAAAAAAAAAAAAAAAAAAAATGTTCTCAAAGTGTAACCTTAATCAAAGCTTATT  
TGTTTGTT

CGCCCATCATCAACTTATTTATTGTATGAAATCACTCTTTTGTAGATAGACCTCTACAGCTTTTACATAATGG  
CACCAGTAATAAATGATGAACGATTTTCGTTACCCTCGGTAACCGGCCAAAAAAAAAAAAAAAAAAAAAAAA  
AAAAATGT

TTTCCTCTTCGAGCTGCAAAAAAGTTTTATCGCTTCGCGAAAAAAAAAAAAAAAAAAAAAAAAATTTAAAGAATTTCA  
AAACGTGTCAGGGCTACTAAATAATTGAACGAGGTCTATGAAATAAATGGGCTGAGAAAATTTCAAGAAA  
AAGGAAAT

TACTAATATTGGCAATAATGCTAACACATTACTAATAATAGCAATAATATTAATAATAATAATAATAATAA  
TAAATTATAATAATAGCAGTAATAAAAAATATCAAATAATAATAATAGTAATAGTAGTAGTAGTAGTAGCAG  
TTGTAGTA

GCACCAGTAATAAATGATGAACGATTTTCGTTACCCTCGGTAACCGGCCAAAAAAAAAAAAAAAAAAAAAAAA  
AAAAAATGTTCTCAAAGTGTAACCTTAATCAAAGCTTATTTGTTTGTATCTGTTTCTCATCGGTTTCGT  
TTGTTGCT

TTACATAATGGCACCAGTAATAAATGATGAACGATTTTCGTTACCCTCGGTAACCGGCCAAAAAAAAAAAA  
AAAAAAAAAAAAAAAAAATGTTCTCAAAGTGTAACCTTAATCAAAGCTTATTTGTTTGTATCTGTTTCTCA  
TCGGTTTC

ACACTCTTTAGAGGTAAAAAAAAAAAAAAAAAAAAAAAAAAGAGAATTTCTTCATGTAATTTACCATGATTC  
TACGTTTTTGAAGCAAAAAATGAAGATAATCCGAGCGCATGCGAAGTAGTCCCTGCCATGCCGCTTCGGAA  
AACTTTC

CTCTTGAAGAAGGGTTTTTTTTCAGTTGGTCAACACTCTTTAGAGGTAAAAAAAAAAAAAAAAAAAAAAAA  
GAGAATTTCTTCATGTAATTTACCATGATTCTACGTTTTTGAAGCAAAAAATGAAGATAATCCGAGCGCATG  
CGAAGTAG

GATGTTTATTTACATATTTCTTTGACGTAATAATATCGGAATAATGCATGCGCATTTCGGGTTAGCCCCGTTA  
TAGGGAAAATGAAAAAAAAAAAAAAAAAATAAATAAAAAAAAAAAGACTAAAAAAAAATAGAAGAGCACGGCAACTTA  
AAAAGAAA



TATGAAGCAGGTTTTTTTTTTTTGGCTTTTTCTTCTAAGAAAAATTTATAGAGAAAAGATGTCTTTAATT  
ATAACCTATTCTTTTTTTTTTGGCCAGCTAATACCAGTAAGTTTTGTTTTTTTTGCGACACTAGATTGGAAG  
AGTAGAAT

TCTACAGCTTTTACATAATGGCACCAGTAATAAATGATGAACGATTTTCGTTACCCTCGGTAAAACCGGCCA  
AAAAAAAAAAAAAAAAAAAAAAAAAATGTTCTCAAAGTGTAACCTAATCAAAAGCTTATTTGTTTGTAT  
CTGTTTCT

TACTGAAAATTGTGGCATTTTTTTTTTTTTTATTTTTTTGACGTAAATTTTTTATGTATATAGCAGTAAATGT  
ATCGATAACGTGTTGGCTAATACTATAGTGAATAACAAAAAGTACTCTTAGTCTCCTTTTAGCATTGTTT  
TCACCAA

GAGGTAAAAAAAAAAAAAAAAAAAAAAAAAAGAGAATTCCTCATGTAATTTACCATGATTCTACGTTTTTG  
CAAGCAAAAATGAAGATAATCCGAGCGCATGCGAAGTAGTCCCTGCCATGCCGCTTCGGAAAACTTTCGA  
AACCAATA

TGTTTCGAGATGATGTTTATTTACATATTCTTTGACGTAATAATATCGGAATAATGCATGCGCATTTCGGGTT  
AGCCCCGTTATAGGAAAATGAAAAAAAAAAAAAAAAAATAAAAAAAAAAAAAAGACTAAAAAATAGAAGAGCA  
CGGCAACT

CTTAACCAATTTTCTAAGTTCGGAACACAAAACCAATGTTTAATCATTTTTAATAACAATTTAGTATAT  
ATATTATTTAATTTTATTAAATTAATTAATAAATAAAGAATTATTAGTCATGTGATTACCATCCTACTTA  
TTATACTA

TGCGTTTTCGAGAAAGTGAAAACCAATTGAATACAAAATAAAAAAAAAAAGAAGAAAGAAATAGCAGGTCTAA  
GATATATAAGAAAGTTAATATCATTTTTGAACATTTTATTTTAGACGCCTTCAGCCGCGGACGCCCGGAG  
TAATCATA

CTCTCAAATTCACTCTCATTCTTTTTCTTTGTTTTCTTATATTTACTATATATATATATATATATATA  
TATATATAGCCAAAAACAATAACAGACACAGTAATTTAGTATGCGTTTATCTCTTATCTTTTCATCCACTGC  
GACCGAAA

GGCAATAATGCTAACACATTACTAATAATAGCAATAATATTAATAATAATAATAATAATAATAAATTATAA  
TAATAGCAGTAATAAAAATATCAAATAATAATAATAGTAATAGTAGTAGTAGTAGTAGCAGTTGTAGTAAT  
GATAATAA

GGAATGATATTATGTGGTATTACTTTTTTTTTTATCATCACTAGCTTCGGCTAAGCCCTTGCATTTTCAATA  
TTCAATTACCAATAATATATATATATATATATATATATATATATATATATATATATATATATATATATAT  
TTTTTTGT

CTTTTCGAGTTTTGATTACAAGTCACTCGAAATGTTTTTTTTCTTTTATATATTCTTCTTTTGTCTATTCT  
TATATACACATATTTAATTTTTGGTAGATTTTTTTTTTTTTTACTTACATTTTGTTACAATAGAGAGATTT  
ACCAATGG

TTCTATTTGGGTGAGCAGTTTTCTCTTCGAGCTGCAAAAAGTTTATCGCTTCGCGAAAAAAAAAAAAA  
AAAAAATTTAAAGAATTTCAAACGTGTCAGGGCTACTAAATAATTGAACGAGGTCTATGAAATAAAATGG  
GCTGAGAA

CAGAAATAACGAAAAATGAACACTTTTTTTTTCTTTTGGCTTGTTAACCTAAACTTGTACATATGCCATA  
TATCTTAAATATATATATATAGCCAACCCGAAGACGCTAAATAAACGCATTTTTTTTTTTTTTTTACAGAA  
TTATTACT

AGTCCCATCTAGGTCAAAAAGACAAAGATCTACTGAAAATTGTGGCATTTTTTTTTTTTTTATTTTTTTGACG  
TAAATTTTTTATGTATATAGCAGTAAATGTATCGATAACGTGTTGGCTAATACTATAGTGAATAACAAAA  
GTACTCTT

GTAGCACATAGAGAAAACATCGCTTTCCCTCCGCAATTTTGAGAATATTCCCTTTTTTTTACCGGATTAAA  
AAAAAAAAAAAAAAAAATTCTGTTATAGATGCACATCATATCTCTCTCCTTTTTTCCGCTTTTATATATTCGTT  
CGTATTAG

ATTTAAGCCTTGCGTTTTGAGAAAAGTGAAAACCAATTGAATACAAAATAAAAAAAAAAGAAAGAAATA  
GCAGGTCTAAGATATATAAGAAAGTTAATATCATTTTTTGAACATTTTATTTTAGACGCCTTCAGCCGCGCG  
ACGCCCGG

GAGTGAATACGTAGCACATAGAGAAAACATCGCTTTCCCTCCGCAATTTTGAGAATATTCCCTTTTTTTTA  
CCGGATTAAAAAAAAAAAAAAAAATTCTGTTATAGATGCACATCATATCTCTCTCCTTTTTTCCGCTTTTA  
TATATTCG

AAAAATAATAAAAAAAAAAAGACTAAAAAATAGAAGAGCACGGCAACTTAAAAAGAAAAAAAAAATTTA  
TGATAACTACAAAATAGTAAAGAACCCTGGCAAAAGAAATAAATCCGGTAAGGGAAGATAGACCGGCTTAA  
AAAGTACT

ATGTACAATTGCTAAATGCTCATTGATTAATTTTAAATTTTTTTCATTTTTATCGCCTTAGACGAAATTGAAA  
TTTTTCACTGAAAAAAAAAAAAAAAAAAGTAGACGAAGAAGCTCATCTCATCGCGATATTAGTTCGATA  
TCTGGGTT

AGTATATATCTACCCTGTCTGTTCTCTACAGTGCTTCTTTTTATTCAAATTTATTGGTTTTTCGTAACCGCC  
GCGCAGGCACGCCGCGCATCTTTTTTCTCGAAGAAAGCGGAAAAATAAAAAACGAAAAATAAAAAAAAA  
AAAAGTAT

TTTTAAATTTTTTTCATTTTTTATCGCCTTAGACGAAATTGAAATTTTTCACTGAAAAAAAAAAAAAAAAA  
GTAGACGAAGAAGCTCATCTCATCGCGATATTAGTTCGATATCTGGGTTTGAGTGAGTAGTATGTTTAATA  
ATAAAGA

GAGCTGCAAAAAAGTTTATCGCTTTCGCGAAAAAAAAAAAAAAAAAATTTAAAGAATTTCAAACGTGTCA  
GGGCTACTAAATAATTGAACGAGGTCTATGAAATAAATGGGCTGAGAAAATTTCAAGAAAAAGGAAATAA  
GTAAGGGC

CAACTTATTTATTGTATGAAATCACTCTTTTAGATAGACCTCTACAGCTTTTACATAATGGCACCAGTAAT  
AAATGATGAACGATTTTCGTTACCCTCGGTAAACCGGCCAAAAAAAAAAAAAAAAAAAAAAAAAATGTTT  
TCAAAGTG

AGGTCAAAAAGACAAAGATCTACTGAAATTTGTGGCATTTTTTTTTTTTTTTTTTTTTTTTGACGTAAATTTTTT  
ATGTATATAGCAGTAAATGTATCGATAACGTGTTGGCTAATACTATAGTGAATAACAAAAGTACTCTTAG  
TCTCCTTT

ACAGATACGAGTTTAGCGAATAATACCGTTTCGCAATCATAACTTTATAAACTCATCCTATTACTTACTAT  
TCGACTGGAAAATTTTCGCGAGCAAAAAAAAAAAAAAAAAAAGAAAAGAAAATCGATGAGCCTGCCG  
TACACAGA

AGGTAGTGAACCATTGAGGTTGCAGCATGAATAAGATATAGGTGAGAGCTAGCGATTTGACATTTAGTACA  
TAGATATTTATATATATATAAGGGAGTTTTTTTTTTTTTTTTTTTTTTTCAAATACGAAAATAGCAGTTCA  
CGAGGCAC

CCTTTATAAACAATTTAGCGTCTTTTTTTTTTTTTCGCTTGGTTTTTCCAATTTGTTTTCGTCGGTTATTATT  
TTTCAATAAAAAATAAATAAGAAAATGAGAAAAAATGAAAAATGAAAAAAAAAATCTGATGGCCTAGAT  
ATGTTTGG

TATAAGAAAAAATTAAAAAAAAAAAGAAAGAAAGTATAATACTAATATTGGCAATAATGCTAACACATTA  
CTAATAATAGCAATAATATTAATAATAATAATAATAATAATAATAATAATAATAATAATAATAATAATA  
CAAATAAT

CACTTTTATTTTCTTTTGGCTTGTTAACCTAACTTGTACATATGCCCATATATCCTTAAATATATATATA  
TAGCCAACCCGAAGACGCTAAATAAACGCATTTTTTTTTTTTTTTTTTACAGAATTATTACTTTTCGTA  
CTTTGGG  
TTTATGCT

GAAAAATGAACACTTTTATTTTCTTTTGGCTTGTTAACCTAACTTGTACATATGCCCATATATCCTTAA  
TATATATATATAGCCAACCCGAAGACGCTAAATAAACGCATTTTTTTTTTTTTTTTTTACAGAATTATTACTTT  
CGTACTTG

ATTCGTTGTTTTCTTCTCTATGGAAATCGTCGAAAAATTTCTTTGTTTTTTTTTTTCTTTTATTGTTGTTG  
TCTTTTCGCGAATTCGCGTCGCGATTTCGTGGATTGTGATGATAATAGCGATGTCTACTACCCGGGTACGTA  
TTTAATTA

CTATCAATATATTTTCACTACGCAGCTTAATTAGTAACTGTATAATAGCATTAAAGTTCATTACTTCTTT  
GTAATTTTATCTTTTTTTTTTTTTTATATAGTTTTTTCAGCGCGCAGCAGAGTTTCATTGGAACGCTTCGCACG  
TTGGAAGA

TTCCTTCTCTATGGAAATCGTCGAAAAATTTCTTTGTTTTTTTTTTTCTTTTATTGTTGTTGTCTTTTCGCG  
AATTCGCGTCGCGATTTCGTGGATTGTGATGATAATAGCGATGTCTACTACCCGGGTACGTATTTAATTATC  
ATTTATAC

AAGAGGGTACGTGATTATAAACAGATACGAGTTTAGCGAATAATACCGTTCGCAATCATAACTTTATAAAA  
CTCATCTATTACTTACTATTTCGACTGGAAAAATTTTCGCAGGCAAAAAAAAAAAAAAAAAAAAAAAAAAGAAAA  
AAAAATCG

GAGAATATTCCTTTTTTTTTTACCGGATTAATAAAAAAAAAAAAAAAAAAATTCTGTTATAGATGCACATCATATCT  
CTCTCCTTTTTCCCGCTTTTATATATTCGTTTCGTATTAGTCACAACAAAAACCAAAGAATACTCGAAATG  
TTAGTTTA

GAATTCGCGTCGCGATTTCGTGGATTGTGATGATAATAGCGATGTCTACTACCCGGGTACGTATTTAATTAT  
CATTTATACATTATATGTTATAGGTTAGCGTATCGTTTTTAAGGCTTGTGTCTTTTGGAAGCATGGCCTAAT  
TGTTTCAGC

ATGGAAATCGTCGAAAAATTTCTTTGTTTTTTTTTTTCTTTTATTGTTGTTGTCTTTTCGCGAATTCGCGTC  
GCGATTTCGTGGATTGTGATGATAATAGCGATGTCTACTACCCGGGTACGTATTTAATTATCATTTATACAT  
TATATGTT

GGTGAGCAGTTTTCTCTTCGAGCTGCAAAAAAGTTTATCGCTTCGCGAAAAAAAAAAAAAAAAAAAAAAAAATTTA  
AAGAATTTCAAACGTGTCAGGGCTACTAAATAATTGAACGAGGTCTATGAAATAAAATGGGCTGAGAAAA  
TTTCAAGA

TGATAGATACAAATTCCTCGCCTTTATAAACAAATTTAGCGTCTTTTTTTTTTTTTGCGTTGGTTTTTCCAATT  
TGTTTTGCGTCGTTATTATTTTTTCAATAAAAAATAAATAAGAAAATGAGAAAAAATGAAAAATGAAAAAA  
AAAAATCT

TCTATAAGGCCATATAAGATTTGATGGCGGGTATGAAGCAGGTTTTTTTTTTTTTTGGCTTTTTCTTCTAAGAA  
AAAATTTATAGAGAAAAGATGTCTTTAATTATAACCTATTCTTTTTTTTTTTTTGCGAGCTAATACCAGTAAG  
TTTTGTTT

ATCAGACCAATTTTTTACTCGACTTTTATTATATAATAGATTATATATATATATATATATATATATCTCTTTT  
GCAGCTAAATGAAAGAAAAAAAAAAGAAATGGCACATATCAAAAATAATCAATTCTCTCGTCTTCACACTTG  
TAGATATT

TTTTTCTAAAGATATTAGAAAAAAAATGTTATGTATCAATATTACTAGGTAAAATACAAAAATGCGCTT  
TTGAAGTATAAATAATACAGTTTTGTTTTTAAGAAATGCTATATATGAATTAATAATAAATGAAACGAAAA  
AAGCACTA

GACAAAGATCTACTGAAAATTGTGGCATTNTTTTTTTTTTTTTTTTTTTTTTTTTTTTTTTTTGACGTAAATTTTTTATGTATATAG  
CAGTAAATGTATCGATAACGTGTTGGCTAATACTATAGTGAATAACAAAAAGTACTCTTAGTCTCCTTTTA  
GCATTTGT

GTAAGTAAATAAGAGGGTACGTGATTATAAACAGATACGAGTTTAGCGAATAATACCGTTTCGCAATCATAA  
CTTTATAAACTCATCCTATTACTTACTATTTCGACTGGAAAATTTTCGCAGGCAAAAAAAAAAAAAAAAAAAAA  
AAAAGAAA

GTGATTATAAACAGATACGAGTTTAGCGAATAATACCGTTTCGCAATCATAACTTTATAAACTCATCCTAT  
TACTTACTATTTCGACTGGAAAATTTTCGCAGGCAAAAAAAAAAAAAAAAAAAAAAGAAAAGAAAATCGAT  
GAGCCTGC

CATTGATTAATTTTTAAATTTTTTCATTTTTATCGCCTTAGACGAAATTGAAATTTTTCACTGAAAAAAAAAAAA  
AAAAAAAAAAGTAGACGAAGAAGCTCATCTCATCGGATATTAGTTCGATATCTGGGTTTGAGTGAGTAGT  
ATGTTTAA

TTGTTGTCCTTTTTTTTTTTTTTTGTGGAAAATTCCTCAATTTGAAATAAGATTCGTATTTATTTTGTAACGA  
TTTTAGTTTTTTTTTTTTTTTTTTTTCTTCCCTTTTACCTTATTATTTGTTTTACCTTTTATGGATATTCATC  
CACTCAGA

ACAATGCACTCTTCCGTCTTCTAAGTTTTCTTTTTATTAAGGATGCGCGCAATAGAAGACACAGGCAATAA  
TAGAATTTATTAGGGTATTATTGTAAGGATAGGCATTACAAAGATAAAATAAGTTTTTTAAAAAAAAAAAAAA  
AAAAAAA

AAAAAAAAAAGACTAAAAAATAGAAGAGCACGGCAACTTAAAAAGAAAAAAAAAATTTATGATAACTAC  
AAAATAGTAAAGAACCCTGGCAAAAGAAATAAATCCGGTAAGGGAAGATAGACCGGCTTAAAAAGTACTTT  
TTCAGATT

CTTTCTGCCGCTCTCAAATTCCTCTCATTCTTTTTTTTTCTTTGTTTTCTTATATTTACTATATATATATA  
TATATATATATATATATAGCCAAAAACAATAACAGACACAGTAATTTAGTATGCGTTTTATCTCTTATCTTT  
CATCCACT

TGCTGACAATAGTCCCATCTAGGTCAAAAAGACAAAGATCTACTGAAAATTGTGGCATTNTTTTTTTTTTTAT  
TTTTTTGACGTAAATTTTTTTATGTATATAGCAGTAAATGTATCGATAACGTGTTGGCTAATACTATAGTGA  
ATAACAAA

ACAATACATACTTTTCGAGTTTTGATTACAAGTCACTCGAAATGTTTTTTTTCTTTTTATATATTCTTCTTTT  
TGTCTATTCTTATATACACATATTTAATTTTTTGGTAGATTTTTTTTTTTTTTACTTACATTTTGTTACAAT  
AGAGAGAT

AAAAC TACA ACTATCAATATATTTT CACTACGCAGCTTAATTAGTAACTGTATAATAGCATTTAAGTTCA  
TTACTTCTTTGTAATTTTATCTTTTTTTTTTTTTTTATATAGTTTTTCAGCGCGCAGCAGAGTTTCATTGGAAC  
GCTTCGCA

TGTCTAATAGAATGGGTGAACTTTTTTTATTTCTTGGCTCATGATTATATTGTAATAACATAGCATTTTA  
TATAATTGTGGTGCTAACCTAAGTACTTTTTTTTTTTTCGCCCTTTCCGGGTTTCTTTTTTTTACCTTTTCG  
TTTTTCTA

CTGAAAATGTTGAAAAATAAGCTGAATGGGGCATTACATGTTTTTCATCCAAACATGCCTTGTCATAACGA  
GATTTCGCGACGTATTCTTTTAGTATTCTGTTCTTTTTTTTTTTTTGCTCCGCGCGCACTTGAACATCTTGCA  
TATTTTTTC

TTTCTAAGTTTCGGAACACAAAACCAATGTTTAATCATTTTTTAATAACAATTTAGTATATATATATTTTT  
AATTTTATTAATTAATTAATAAATAAAGAATTATTAGTCATGTGATTACCATCCTACTTATTATACTAAA  
TCGTTTTG

ATCCCCAAATTTTTTGTCTATTTCGTTGTTTTCTTCTCTATGGAAATCGTCGAAAAATTTCTTTGTTTTT  
TTTTTCCTTTATTGTTGTTGTCTTTTCGCGAATTCGCGTCGCGATTTCGTGGATTGTGATGATAATAGCGAT  
GTCTACTA

TAGAGCAAAACAAAAAGCAAGAAAAAAGGTAATAAATGTAACAAATCTATTAACGTTAGAAAATAACAAAA  
AAAAAAAAGAAAAAGATAATATAATATAATACCTTTATATATGTGATTTATCTAGCGTCACAGTATGTAA  
TATAATA

CTACCGTGTCTGTTCTCTACAGTGCTTCTTTTTATTCAAATTTATTGGTTTTTCGTAACCGCCGCGCAGGCAC  
GCCGCGCATCTCTTTTTCTCGAAGAAAGCGGAAAAATAAAAAACGAAAAAATAAAAAAAAAAAAAAGTATAA  
ATAGTGAA

AAATTCCTCGCCTTTATAAACAATTTAGCGTCTTTTTTTTTTTGCGTTGGTTTTTCCAATTTGTTTGCCTC  
GGTTATTATTTTTCAATAAAAAATAAATAAGAAAATGAGAAAAAATGAAAAATGAAAAAATAAATCTGA  
TGGCCTAG

TAAGACTAAAAAATTTCAAGATTAATTCCTCAACCTATATATATATATATATATATATATATATATACTGTTT  
CAAGTATATCTTCTGCTAAATAATTAATATGCTCGTATGTAGAAAACAAAAAAGAGGTCTTTTCTCTTTT  
TTCTCCCG

AAAAAGCAAGAAAAAAGGTAATAAATGTAACAAATCTATTAACGTTAGAAAATAACAAAAAATAAAG  
AAAAAGATAATATAATATAATACCTTTATATATGTGATTTATCTAGCGTCACAGTATGTAATATAAATATC  
AATGAGTT

AGATATTAGAAAAAATGTTATGTATCAATATTACTAGGTAAAATACAAAAATGCGCTTTTGAAGTATA  
AATAATACAGTTTTGTTTTAAGAAATGCTATATATGAATTAATAATAAATGAAACGAAAAAAGCACTACT  
TGAGTTTT

GAGAAAACATCGCTTTCCCTCCGCAATTTGAGAATATTCCTTTTTTTTTACCGGATTAATAAATAAATAA  
AAAATTCGTATAGATGCACATCATATCTCTCTCTCTTTTTTCCCGCTTTTATATATTCGTTTCGTATTAGTC  
ACAACAAA

GCCAACTATTTTGCACAGGAAAGAAAAATCACCAATACAATACTACTATATTTTACCCAAGTTAATACGGG  
AAAGTATATTTTCTTTTCCATATTTTCTTTTTTATTGACGTTTGCATTTTTTATAGAGCAACTAGTAAACAA  
AAAACCAG

CTCTGCTTATTGTTTCGAGATGATGTTTATTTACATATTTCTTTGACGTAATAATATCGGAATAATGCATGCG  
CATTTCGGTTAGCCCCGTTATAGGGAAAATGAAAAAATAAATAAATAAATAAATAAATAAATAAATAAATAA  
TAGAAGAG

AATTTTATTTCTTTCTGCCGCTCTCAAATTCCTCTCATTTCTTTTTCTTTGTTTTTCTTATATTTACTA  
TATATATATATATATATATATATATATATATAGCCAAAACAATAACAGACACAGTAATTTAGTATGCGTTTATC  
TCTTATCT

TCGAATTCCTCTCTTTGGCCGTGTTTCGGGCCACGAGGCGAAAATTTTTTTTTTTTAAATCGAAAAAAG  
GAAAAAAGATTAACGTTTCTTTTTCTGTTCTATCGTCTTCTACGATATCGCATGTAACACAATGCAGCTAT  
CTGATAAT

TTCTTTTGGCTTGTTAACCTAAACTTGTACATATGCCCATATATCCTTAAATATATATATATAGCCAACCC  
GAAGACGCTAAATAAACGCATTTTTTTTTTTTTTACAGAATTATTACTTTTCGTACTTGGGTTTATGCTTC  
TTATAACA

ACATTTTCATGAAAAAAGAAAAATTGTATGTATAATGCTTGTCACTTTTTTTATAATTGATATATGTAT  
ATGTATATGTATACATATATATATAGTTGATTTAGAATTTATTTATATTAACAAAAGACGAAGAGAGG  
GCAGATAA

TAGTTTAACTCTCTTGAAGAAGGGTTTTTTTTCAGTTGGTCAACACTCTTTAGAGGTAAAAAAAAAAAAAAAAAAAA  
AAAAAAAAAAGAGAATTCTTCATGTAATTTACCATGATTCTACGTTTTTTCGCAAGCAAAAATGAAGATAATC  
CGAGCGCA

ATAAAAAAAAAAAGCGGTAACCTCGCGGAAGCATTGCCGATGCTTACCGAGATTTGCCGCGGATAACCGAA  
CCATCATTGGGGTAGGAAACATTATAAATATTTGATATATATAAAGGAAAAAGCTTGATTTGGTCTTGTA  
TATCCCAG

GTTTTTTTTTTTTTTGGCTTTTTCTTCTAAGAAAAATTTATAGAGAAAAGATGTCTTTAATTATAACCTATT  
CTTTTTTTTTTTTGGCAGCTAATACCAGTAAGTTTTGTTTTTTTTTTCGACACTAGATTGGAAGAGTAGAATCA  
GAAAATGA

TGTCACTGCTGAAGATAACGTAAGACTAAAAAATTTCAAGATTAATCCCAACCTATATATATATATATA  
TATATATATACTGTTTAGATCAAGTATATCTTCCTGCTAAATAATTAATATGCTCGTATGTAGAAAACAAA  
AAAGAGGT

GGCTACAATTAGCCTCACCGATGTAACGTTATATAACGCTGCGGTCGTAGAATATGATTTTTCTGAATTTT  
AATTTTTTTTTTTTTTTTTTTTTTTCATTTCTTTAACATCTAAAATAGATTTTAGAATCAGAAAAGTGAAGAGTA  
TTCCACAT

TGAAAAATAAGCTGAATGGGGCATTACATGTTTTTCATCCAAACATGCCTTGTCAATAACGAGATTCGCGAC  
GTATTCTTTTAGTATTCTGTTCTTTTTTTTTTTTTGCTCCGCGCGCACTTGAACATCTTGCATATTTTTCTT  
TTCTGTTT

GAAAGTGAAAACCAATTGAATACAAAATAAAAAAAAAAAGAAGAAAGAAATAGCAGGTCTAAGATATATAAG  
AAAGTTAATATCATTTTTGAACATTTTTATTTTAGACGCCTTCAGCCGCGCGACGCCCGGAGTAATCATATG  
CCCATGAC

AGAGAATTTTGAGATGAAAAAAAAAAAAATGAATCTGTACTATTTCTTTTTTTAGTGCAAAAGTTTTGTTT  
TAATATAGAGATAAATAAAAAAATGAACATATTACTATAATATCAACAAAATATGATGTAATGTCTGCAAT  
AAAGATGA

CTAACACATTACTAATAATAGCAATAATATTAATAATAATAATAATAATAATAAATTATAATAATAGCAGT  
AATAAAAAATATCAAATAATAATAATAGTAATAGTAGTAGTAGTAGTAGCAGTTGTAGTAATGATAATAATA  
ATATAATA

CCTTTTTTTTTTACCGATTAAAAAAAAAAAAAAAAAATTCTGTTATAGATGCACATCATATCTCTCTCTTTTT  
TCCCGCTTTTATATATTCGTTTCGTATTAGTCACAACAAAAACAAAAGAATACTCGAAATGTTAGTTTATA  
TATATATA

TATACAAGACTAGAGCAAAACAAAAAGCAAGAAAAAAGGTAATAAATGTAACAAATCTATTAACGTTAGAA  
AATAACAAAAAAGAAAAAGATAATATAATATAATACCTTTATATATGTGATTTATCTAGCGTCA  
CAGTATGT

ATTA AAAAGATTAGTTTACTTTTTCTGTAGAATGTTAATTAGTTTATTGCATAGAAAATCTTTAATACTGA  
ATGACAAAATTTCCACAATTTTTTTTTAAAAAATTATCGACAACCTGCAGGACTCGAACCTGC GCGGGCAA  
GCCCAAAA

GGTGAGAGCTAGCGATTTGACATTTAGTACATAGATATTTATATATATATATAAGGGAGTTTTTTTTTTATT  
TTTTTTTTTCAAATACGAAAATAGCAGTTCACGAGGCACTCACTTACTGGTTTTTAAAGTGCACCCCTTT  
CGAAACGT

ATCATAGAAATATAAGAAAAAATTAAAAAAAAAAAGAAAGAAAGTATAATACTAATATTGGCAATAATGC  
TAACACATTACTAATAATAGCAATAATATTAATAATAATAATAATAATAATAAATTATAATAATAGCAGTA  
ATAAAAAAT

TAAATGATGAACGATTTTCGTTACCTCGGTAAAACCGGCCAAAAAAAAAAAAAAAAAAAAAAAAAATGTT  
CTCAAAGTGAACTTAATCAAAGCTTATTTGTTTGTATCTGTTTCTCATCGGTTTCGTTTGTGCTTA  
AAGGGTGG

GTTTAGCGAATAATACCGTTTCGCAATCATAACTTTATAAACTCATCCTATTACTTACTATTCGACTGGAA  
AATTTTCGAGGCAAAAAAAAAAAAAAAAAAAAAAAAAAGAAAAGAAAATCGATGAGCCTGCCGTACACAGAGA  
TATAATAA

CGGTTCTTTTCTTTTCTTTTTTCTTTTTTTACGATGCATGTATATGTATTTTAATAGTAAAATATATTAT  
TAAATAGGGGAGTGTGGTTGTGTGATTTAGTAGAGTAGTTAGAATAAAAACGACACAGTGGAAAAAAAAAG  
GTATTTTC

GCTACAGTGTGAGTGAATACGTAGCACATAGAGAAAACATCGCTTTCCCTCCGCAATTTTGAGAATATTCC  
CTTTTTTTTACCGGATTAATAAAAAAAAAAAAAAAAAAATTCTGTTATAGATGCACATCATATCTCTCTCTTTT  
CCCCTTT

TCAGATAATACCTTAAGCGTCGAAACCTCATACCCCTCATCTGGCTCGGGAGCCAGTATACTATATATAT  
ATATATATATATATATATATATAAATTCCTAAAATACTCTCACACAGAAGCACAATAATGAGTGACG  
CAAATGCA

TCTCTTGGCCGTGTTTCGGGCCACGAGGCGAAAATTTTTTTTTTTAATCGAAAAAAAAAGGAAAAAAAAAGA  
TTAACGTTTCTTTTCTTATCGTCTTCTACGATATCGCATGTAACACAATGCAGCTATCTGATAATAT  
GGTCCAG

AAAAAGAAAGAAAGTATAATACTAATATTGGCAATAATGCTAACACATTACTAATAATAGCAATAATATT  
AATAATAATAATAATAATAATAAATTATAATAATAGCAGTAATAAAAATATCAAATAATAATAATAGTAAT  
AGTAGTAG

TACCAGGTAAGGCTACAATTAGCCTCACCGATGTAACGTTATATAACGCTGCGGTCGTAGAATATGATTTT  
TCTGAATTTTAATTTTTTTTTTTTTTTTTTTTCAATTTCTTTAACATCTAAAATAGATTTTAGAATCAGAAA  
GTGAAGAG

TTTTTTATTTGTGAAAATTCCTCAATTTGAAATAAGATTTCGTATTTATTTTGTAAAACGATTTTAGTTTT  
TATTTTTTTTTTTTTTTCCCTTTTACCTTATTATTTGTTTTACCCTTTATGGATATTCATCCACTCAGAAA  
CTAATATA

GTTTTTTTAAGGGAAAACGTATATCACTTAGAGATTATATTAATGAAAAAGGTGTATACAAATGTATAAT  
AATAATAGTATATAAGAAAAGTATTCGCTATTTATAGTGATTTTAGTTTGTACAATGTACTGTATTTTTTT  
TAAATGTA

ATCGCTTGGCCAGAAATAACGAAAAATGAACACTTTTTATTTTCTTTTGGCTTGTTAACCTAACTTGTACA  
TATGCCCATATATCCTTAAATATATATATATAGCCAACCCGAAGACGCTAAATAAACGCATTTTTTTTTTT  
TTTTACAG

TTCCCGCTTTTATATATTCGTTTCGTATTAGTCACAACAAAAACAAAAGAATACTCGAAATGTTAGTTTAT  
ATATATATATATAGTGTGCGTTCTTTGCGGATATGGAAAATCTTGATATCTGCTGCATTACGACTATGTC  
GCGCGCA

CATTGTACATTACCAGGTAAGGCTACAATTAGCCTCACCGATGTAACGTTATATAACGCTGCGGTCGTAGA  
ATATGATTTTCTGAATTTTAATTTTTTTTTTTTTTTTTTTTCAATTTCTTTAACATCTAAAATAGATTTTAG  
AATCAGAA

TCCGGCGGTATTGAAGGAGAAAAATTTGGGCGGGAGCATATTATTGTAATTAATATATACATATATATATA  
TATATATACATCAACCTTACAACATATGCGTTTAGAATCCTAACTTTGATCTTACCATCAATAACGGTAGT  
GGCATGAC

TTATCATCACTAGCTTCGGCTAAGCCCTTGCATTTTCAATATTCAATTACCAAATAATATATATATATATA  
TATATATATGTATGTATGGTATACCTTGTGTTACTGATGTGTTTTTTGTTGACGTCATCCTTTTGATTTAC  
TCACATGC

TTCATTTTTATCGCCTTAGACGAAATTGAAATTTTTCACTGAAAAAAAAAAAAAAAAAGTAGACGAAG  
AAGCTCATCTCATCGGATATTAGTTCGATATCTGGGTTTGAGTGAGTAGTATGTTTAATAATAAAGAGT  
ATAATCCA

CCTTAAGCGTCGAAACCTCATACCCCTCATCTGGCTCGGGAGCCAGTATACTATATATATATATATATAT  
ATATATATATATATAAATTCCTAAAATACTCTCACACAGAAGCACAATAATGAGTGACGCAAATGCAAT  
TTATGACT

CAAAAAAAAAAGAATGAAAGTACTATCAGCTTATAAGTCCTGATTAATTAATAAAGAATGCAGAATAGCA  
CCTTATAGTAAAAAAGTAAATTTAAGTAATTAATAATACTATACTGTAACTTTTTTGAATTGTATTTTC  
CCTGGCAT

AAAAAATGTTATGTATCAATATTACTAGGTAAAATACAAAAATGCGCTTTTGAAGTATAATAATACAG  
TTTTGTTTTAAGAAATGCTATATATGAATTAATAATAAATGAAACGAAAAAAGCACTACTTGGAGTTTTAA  
TGTCGTAA

AAAATGTTTTGAATTTTTATTTCTTTCTGCCGCTCTCAAATTCCTCTCATTTCTTTTTCTTTGTTTTCTT  
ATATTTACTATATATATATATATATATATATATATAGCCAAAAACAATAACAGACACAGTAATTTAGTA  
TGCGTTTA

AAATGGACCCTTGTCGGTCACGTGAGCAAAAATACTATTGCCGCCGACGGCCGTAGATAATAACAAAGGAA  
TAAAAAAAAAAGCGGTAACCTCGCGGAAGCATTGCCGATGCTTACCGAGATTTGCCGCGGATAACCGAAC  
CATCATTG

AAATTAAAAAAAAAAAGAAAGAAAGTATAATACTAATATTGGCAATAATGCTAACACACTACTAATAATAG  
CAATAATATTAATAATAATAATAATAATAATAAATTATAATAATAGCAGTAATAAAAAATATCAATAATAA  
TAATAGTA

CGGTAGACTTTTGAATTCCTCTCTTTGGCCGTGTTTTGGGCCACGAGGCGAAAATTTTTTTTTTTAATCG  
AAAAAAAAAAGGAAAAAAGATTAACGTTTTTTTTCTGTTCTATCGTCTTCTACGATATCGCATGTAACACA  
ATGCAGCT

AAAATTTCAAGATTAATTCCTAACCTATATATATATATATATATATATATATATATACTGTTTAGATCAAGTATATC  
TTCCTGCTAAATAATTAATATGCTCGTATGTAGAAAACAAAAAAGAGGTCTTTTCTTTTTTCTCCCGTT  
ACTTTTTT

TCCTAATATAACAATACATACTTTTCGAGTTTTGATTACAAGTCACTCGAAATGTTTTTTTCTTTTTATATA  
TTCTTCCTTTTGTCTATTCTTATATACACATATTTTAATTTTTTGGTAGATTTTTTTTTTTTTTACTTACATT  
TTGTTACA

AGCCTCACCGATGTAACGTTATATAACGCTGCGGTCGTAGAATATGATTTTTCTGAATTTTAATTTTTTTT  
TTTTTTTTTTTTTCAATTTCTTTAACATCTAAAATAGATTTTAGAATCAGAAAAGTGAAGAGTATTCCACATCA  
TCGACTTA

GCTGAATGGGGCATTACATGTTTTTATCCAAACATGCCTTGTCAATAACGAGATTCGCGACGTATTCTTTT  
AGTATTCTGTTCTTTTTTTTTTTTTGCTCCGCGCGCACTTGAACATCTTGCATATTTTTCTTTTCTGTTTTT  
ATCCAGAG

ATCTTGAACAAAAGTAATACTATTTAAGGGTGGGCGGGTTGTTATACCGTTTTGAGACGATCTACTATA  
ACGTTATATTTAATTATATAAGTGATGAATTTAATGTCCCGTCCACAACACGAAATCGCACCTCATTTCAA  
CGCGGCAA



TACAAAATAAAAAAAAAAAGAAGAAAGAAATAGCAGGTCTAAGATATATAAGAAAGTTAATATCATTTTTGA  
ACATTTTTATTTAGACGCCTTCAGCCGCGCGACGCCCGGAGTAATCATATGCCCATGACTTTACCAAAGG  
CAACAGGG

TTGTAAAACGATTTTAGTTTTATTTTTTTTTTTTTCTTCCCTTTTACCTTATTATTTGTTTTACCCTTTAT  
GGATATTCATCCACTCAGAACTAATATATCAAAATCAACGATAAGATCACAAGAGGTGAAATAAGAAAAA  
TAAAAGAA

ATTGCATTATGGTCAACCAAAAATCAAAAAATTATTAGTAATATCAACATATGTATATTTAATGTATGTAA  
ACAATGATTAAATATTAATAAAATATATCTACATATAAGTATACGCAAATGGGGTTTTTCTTCAAAAAAT  
TGTTTGCT

GAACTTTTACTTAATCCGCGGGTGAATTTTCATTTTTATATTTTCCATTTTATAACAGGCCGTCCCTAAA  
AACACCGCGTAAGAACATAGTTTATACACTTATATAAGTAAAAGGTGTAGTAGGTTGGAATGGTAAAGGGC  
GTATTGTG

CGAAACCTCATACCCCTCATCTGGCTCGGGAGCCAGTATACTATATATATATATATATATATATATATAT  
ATATATAAATTCCTAAAATACTCTCACACAGAAGCACAATAATGAGTGACGCAAATGCAATTTATGACTAA  
TTCATCAC

TTCTCGATATACCTCTGTCTTACTATCAGTGGTTAAACCTTATGCAAATATAATATATATATATATATAT  
ATATATATATCTCATACTTTTGTGATTCTTGTGTAATTATTGGAAAAGACAAAACAAAGCAAGCGTTTCT  
ATTCATAT

GCTAAATGCTCATTGATTAATTTTAAATTTTTTCATTTTTATCGCCTTAGACGAAATTGAAATTTTTCACTG  
AAAAAAAAAAAAAAAAAAGTAGACGAAGAAGCTCATCTCATCGGATATTAGTTCGATATCTGGGTTTG  
AGTGAGTA

GCTTGTCTCCTCTGCTTATTGTTTCGAGATGATGTTTATTTACATATTCTTTGACGTAATAATATCGGAAT  
AATGCATGCGCATTCCGGGTTAGCCCCGTTATAGGGAAAATGAAAAAAAAAAAAAAAAATAAAAAAAAAAAAAA  
ACTAAAAA

ATATATTGCTTCTAAGATATGTCACAATTCTGTGTATACCATGTACAATTGCTAAATGCTCATTGATTAAT  
TTTTAAATTTTTTCATTTTTATCGCCTTAGACGAAATTGAAATTTTTTCACTGAAAAAAAAAAAAAAAAAAG  
TAGACGAA

ACTTCCCATGGTCCAAGTATCAAAGCTTCAACAAAGCAATCACCTTAAAAGGTTATTTAAGGTCATTATTA  
TATTAACGTTTGAATAATTAATATTATTATTAATAAATAAATTTTTTATGCAAATTTCTCATTTTTCAAT  
TTAAGCGG

TTGTCTTTTTCGGTTCTTTTCTTTTCTTTTTTCTTTTTTTTACGATGCATGTATATGTATTTTAATAGTAA  
AATATATTATTAATAGGGGAGTGTGGTTGTGTGATTTAGTAGAGTAGTTAGAATAAAAACGACACAGTGG  
AAAAAAA

CTTCTGATAAGAACGGCATGAATAATCAAGTAGGTTTTATAACTGGTATACATTAATATAATCAACTAT  
TTATACTATCAAAAAAAAAAGCTTTTTTTTTTTTTGTTTTTTTTAAGTTTTATGGAATTTTCATTCGTAAAGC  
GTTTGTCT

GACCCCGTCTTGTCTAATAGAATGGGTGAACTTTTTTTATTTCTTGGCTCATGATTATATTGTAATAATACA  
TAGCATTTTATATAATTGTGGTGCTAACCTAAGTACTTTTTTTTTTTCGCCCTTCCGGGTTTCTTTTTTT  
CACTTTTT

CAATACCGCCTCCGGCGGTATTGAAGGAGAAAAATTTGGGCGGGAGCATATTATTGTAATTAATATATACA  
TATATATATATATATACATCAACCTTACAACATATGCGTTTGAATCCTAACTTTGATCTTACCATCAA  
TAACGGTA

CTCTTTTTCTCGAAGAAAGCGGAAAAATAAAAACGAAAAATAAAAAAAAAAAAAAGTATAAATAGTGAAG  
ACTTTTTCCATTTGATATTTGGTAAAAATTTGCGCTGGAAGTTTTTTGCTGAACATTTAACCGGAGAATCT  
TGGTGGCT

CCCCTCTAGGTAAACACAGTTCCTCGATATACCTCTGTCTTACTATCAGTGGTTAAACCTTATGCAAATA  
TAATATATATATATATATATATATATATATATCTCATACTTTTTGTTGATTCTTGTGTAATTATTGGAAAAGC  
AAAAAAA

GAATCTTGGTATATATTGCTTCTAAGATATGTCACAATTCTGTGTATACCATGTACAATTGCTAAATGCTC  
ATTGATTAATTTTAAATTTTTCATTTTTATCGCCTTAGACGAAATTGAAATTTTCTACTGAAAAAAAAA  
AAAAAAA

TGTGGCATTTTTTTTTTTTTTTTTTTTTTGACGTAAATTTTTTATGTATATAGCAGTAAATGTATCGATAACG  
TGTTGGCTAATACTATAGTGAATAACAAAAAGTACTCTTAGTCTCCTTTTAGCATTGTGTTTACCAAAGA  
AGATGTTG

TTTTTATTTTTCGCGTTTTTAAAGATAATGTCTTAACCAATTTTCTAAGTTCGGAACACAAAACCAATGTT  
TAATCATTTTTAATAAACAATTTAGTATATATATTATTTAATTTTATTAATTAATTAATTAATTAAGAA  
TTATTAGT

AATCTTTTATGTTTTTTTTAAGGGAAACGTATATCACTTAGAGATTATATTAATGAAAAAGGTGTATACA  
AATGTATAATAATAATAGTATATAAGAAAAGTATTCGCTATTTATAGTGATTTTAGTTTGTACAATGTACT  
GTATTTTT

CACTCTCATTTCTTTTTCTTTGTTTTCTTATATTTACTATATATATATATATATATATATATATATAGC  
CAAAAACAATAACAGACACAGTAATTTAGTATGCGTTTATCTCTTATCTTTCATCCACTGCGACCGAAACG  
TTTGAATC

TTTAGAAATTTCTTTTTTTTTTTTTTTTTCCCTTGACTTTCTTTTCTTTTATGTACCTATAATGAAAGAC  
TATTTTATAATTAGAGCTATTTAAAAATTATTAATGAGGTTGATGAGTGGATAGAATATTATATTTTGA  
GCTAAATT

CTGCCAAAAGCGGTAGACTTTTGAATTCCTCTCTTGGCCGTGTTTCGGGCCACGAGGCGAAAATTTTTTT  
TTTTTAATCGAAAAAAAAAGGAAAAAAAAAGATTAACGTTTCTTTTTCGTTCTATCGTCTTCTACGATATCGC  
ATGTAACA

AACGTTACTATTATTGTCTTAGGCAACAAAAATCCATGAAAAGAATTTTACCGTTATCGATACCATTGTAT  
TTATTTTATTTATTTAATTTTTTTTTTTTTTTTTGGTTTATATCCTGCAAACAACACTTCGAATTC AATT  
CGATATTT

CGGAACACAAAACCAATGTTTAAATCATTTTTAATAAACAATTTAGTATATATATTATTTAATTTTATTA  
AATTAATTAATTAATTAAGAATTATTAGTCATGTGATTACCATCCTACTTATTATACTAAATCGTTTTTGTG  
GATGTGTA

AAGATAATGTCTTAACCAATTTTCTAAGTTCGGAACACAAAACCAATGTTTAAATCATTTTTAATAAACA  
TTTAGTATATATATTATTTAATTTTATTAATTAATTAATTAATTAAGAATTATTAGTCATGTGATTACC  
ATCCTACT

TTTTAAGAGAATTGCATTATGGTCAACCAAAAAATCAAAAAATTATTAGTAATATCAACATATGTATATTTA  
ATGTATGTAAACAATGATTAATATTAATAAATATATCTACATATAAGTATACGAAATGGGGTTTTTCT  
TCAAAAA

TTGATTACAAGTCACTCGAAATGTTTTTTCTTTTTATATATTCTTCTTTTGTCTATTCTTATATACACA  
TATTTAATTTTTGGTAGATTTTTTTTTTTTACTTACATTTTGTACAATAGAGAGATTTACCAATGGTG  
TATCTCGA

GAGATGAAAAAAAAAAAAATGAATCTGTACTATTTCTTTTTTTAGTGCAAAAGTTTTGTTTTAATATAGAG  
ATAAATAAAAAAATGAACATATTACTATAATATCAACAAAATATGATGTAATGTCTGCAATAAAGATGAGT  
CAATTGCA

ACCAATTGAATACAAAATAAAAAAAAAAGAAAGAAATAGCAGGTCTAAGATATATAAGAAAGTTAATA  
TCATTTTTGAACATTTTATTTTAGACGCCTTCAGCCGCGCGACGCCCGGAGTAATCATATGCCCATGACTT  
TACCAAAA

AAGAGAAAGAGAGAGAGAGAGAGAGAAAAAAAAAAAAAGAAATATATAGATTTAGGTATTCGTTAAATATATAC  
ACATTAATGGCCTCAGAAATTTTAAATATATAAATAAATAAGCTCTTATATGTACAAATTTGTGCATATA  
CTTTTCTT

AGGCAAAAAAAAAAAAAAAAAAAAAAGAAAGAAAATCGATGAGCCTGCCGTACACAGAGATATAATAAA  
TTTAGAATGCAAGAATGGTATGGCGGTGATGAAGATAATCATTTCCCTGCTTTTTTATTTTTGTTGCGCTT  
CTTCTTGC

AAAAAAGTTAAGAATTGATGAGAGAATTTTGAGATGAAAAAAAAAAAAATGAATCTGTACTATTTCTTTTT  
TTAGTGCAAAAGTTTTGTTTTAATATAGAGATAAATAAAAAAATGAACATATTACTATAATATCAACAAA  
TATGATGT

ATGAGATATCTGAGATACATGTGTATGTATATATGCACGTTTTCTTTTTATTATCTAAAAATCATATTATAT  
TAAGTAAGAGAAAAAATGTACAACATATAAATATATATTTTATTTAAATGGTTTTGAATTTTTCTATT  
CTGGTTGA

AGAAAAAAAAAAAAAAAAAAAAAGGCTGAATGGATAAAGCGAGAGTCGTAAAGACCGAATGCAATGTCAG  
TTTATACATTTTTATTCTATTGGTATTATATTATAAAAAAGATATATGATTAGAAAAC TAGAATGTAATGCA  
ATATTACA

CGACTTTTGAGCTTGTCTCTCTGCTTATTGTTTCGAGATGATGTTTTATTTACATATTCTTTGACGTAATA  
ATATCGGAATAATGCATGCGCATTCCGGTTAGCCCCGTTATAGGGAAAATGAAAAAAAAAAAAATAATAAA  
AAAAAAA

AAAACAATCTTATACAAGACTAGAGCAAAACAAAAGCAAGAAAAAAGGTAATAAATGTAACAAATCTATT  
AACGTTAGAAAATAACAAAAAAAAAAAAAGAAAAGATAATATAATATAATACCTTTATATATGTGATTTA  
TCTAGCGT

ATAAAACCTCAAACTACAACATCAATATATTTTACACTACGCAGCTTAATTAGTAACTGTATAATAGCA  
TTTTAAGTTCATTACTTCTTTGTAATTTTATCTTTTTTTTTTTTTTATATAGTTTTTCAGCGCGCAGCAGGTT  
TCATTGGA

CCATTCTCCGAGGTAGTGAACCATTGAGGTTGCAGCATGAATAAGATATAGGTGAGAGCTAGCGATTTGAC  
ATTTAGTACATAGATATTTATATATATATAAAGGGAGTTTTTTTTTTTTTTTTTTTCAAATACGAAA  
TAGCAGTT

AAAAAAAAAAAAAAAAAAAAAGAAAAATAAAAAATAAATATGGATGGAAATCATAGGTTTACTCC  
AGATTCAAAGAATTTAATACTGTTGTAAAAAGTAAAGAGTCTTCCACTGGCAGAAATCCGTATCAGACTC  
CGCCCTTA

CTTCTTGGGGAAATCATTGTATTACGTACTTTTTCTTAAAGATATTAGAAAAAAAAAATGTTATGTATCAA  
TATTACTAGGTAATAACAAAATGCGCTTTTGAAGTATAAATAATACAGTTTTGTTTTAAGAAATGCTAT  
ATATGAAT

TATATATTCGTTTCGTATTAGTCAACAACAAAACAAAAGAATACTCGAAATGTTAGTTTTATATATATATAT  
ATAGTGTGCGTTCTTTGCGGATATGGAAAATCTTGATATCTGCTGCATTTCAGACTATGTGCGCGGGCAA  
GGTATGCT

GTTTTCTTTGAACTTTTACTTAATCCGCGGGTCAAATTTTCAATTTTTATATTTTCCATTTTATAACAGGCC  
GTCCCCTAAAAACACCGCGTAAGAACATAGTTTATACACTTATATAAGTAAAAGGTGTAGTAGTTGGAAT  
GGTAAAGG

AGGTAGAGGAGACGATGTAATGTAAGTCCGCGCTTTTCAAGTTTGGCCCCATATATATATATATAAACAGA  
CGGATAATTATATCATATTAATGCGATAGCATAAATTTCTCGATGCGCATTGGTAAATTGTAGCATGGCG  
CGAAGTCT

TTGTCGGTCACGTGAGCAAAAATACTATTGCGCGCCGACGGCCGTAGATAATAACAAAGGAATAAAAAAAAA  
AAAGCGGTAACTCGCGGAAGCATTGCCGATGCTTACCGAGATTTGCCGCGGATAACCGAACCATCATTGGG  
GTAGGAAA

GAAAAATTACGCCAAATAGGCAGGTTTTCAATATTAAGAGTTAAGTATGCAAAATTTACAAAAAGTTAAT  
GGTCAAAGTATAACTATAAAAAATATAATAAAACAATAAAACAATAACAACCTCTCAGAATTGCAAAGCTTGAC  
CCTTTTGC

TGGATTATCAAGGCACTATATTTTACCCTACAGTAAATACTTCTGATAAGAACGGCATGAATAATCAAGT  
AGGTTTTATAATACTGGTATACATTAATATAATCAACTATTTTATACTATCAAAAAAAAAAGCTTTTTTTTTT  
TTTGT

CTATAAAAGTTGAACAGTGAAGATTAACCTATGTGTTATTTGCATATCATATATAAATTGTAGTTTTTTT  
TATAAAAGTTGGGAAAAAGTTATAGTCGCGTATATTTTAAATTACTCTAAGCAACTAAATGGTCACGGTTT  
AGAGCATG

GAGAAAAAAAAAAAAAGAAATATATAGATTTAGGTATTCGTTAAATATATACACATTAATGGCCTCAGAAA  
TTTTAAATATATAAATAAATAAGCTCTTATATGTACAAATTTGTGCATATACTTTTCTTGACCTTTTTTACT  
CCTCGGCT

ATAACATAAATTTAGAAATTTCTTTTTTTTTTTTTTTTTTCCCTTGACTTTCTTTTCTTTTATGTACCTAT  
AATGAAAGACTATTTTATAATTAGAGCTATTTAAAAATTATTAATGAGGTTGATGAGTGGATAGAATATTA  
TATTTTGA

ATTTTTCACTGAAAAAAAAAAAAAAAAAAGTAGACGAAGAAGCTCATCTCATCGCGATATTAGTTCGAT  
ATCTGGGTTTGGTGGTATGTTTAAATAAAAAGAGTATAATCCAGATATAGCAGACAATAAAATTT  
CAAGATGG

GAACGGCATGAATAATCAAGTAGGTTTTATAATACTGGTATACATTAATATAATCAACTATTTATACTATC  
AAAAAAAAAAGCTTTTTTTTTTTTTTGTTTTTTTAAGTTTTATGGAATTTCAATTCGTAAAGGCGTTTGTCTCT  
AGTTTGTG

AAAAGAAAAAGTGGAGGAAGGTTGGTTGTATTGTCTTTTTCGGTTCTTTTCTTTTCTTTTTTCTTTTTT  
ACGATGCATGTATATGTATTTTAAATAGTAAAATATATTATTAATAGGGGAGTGTGGTTGTGTGATTTAGT  
AGAGTAGT

GAAAAAAAAAAAAAAAAAAGTAGACGAAGAAGCTCATCTCATCGCGATATTAGTTCGATATCTGGGTTT  
GAGTGAGTAGTATGTTTAAATAAAAAGAGTATAATCCAGATATAGCAGACAATAAAATTTCAAGATGGCC  
AAGAGAAG

TTTTTGACAACATAAAAAGTTGAACAGTGAAGATTAACCTATGTGTTATTTGCATATCATATATAAATTG  
TAGTTTTTTGTATAAAAAGTTGGGAAAAAGTTATAGTCGCGTATATTTTAAATTACTCTAAGCAACTAAATG  
GTCACGGT

GTCCAAGTATCAAAGCTTCAACAAAGCAATCACCTTAAAAGGTTATTTAAGGTCATTATTATATTAACG  
TTTGAAAATTAATATTATTATTAATAAATAAATTTTTTATGCAAAATTTCTCATTTTCAATTTAAGCGGAG  
TCGGAGTT

GAGAGAGCCGTACCGCAATAAAATGGACCCTTGTCTGGTCACGTGAGCAAAAATACTATTGCCGCCGACGGC  
CGTAGATAATAACAAAGGAATAAAAAAAAAAAGCGGTAACCTCGCGGAAGCATTGCCGATGCTTACCGAGA  
TTTGCCGC

TTGTAACTAACTTGTACATATGCCCATATATCCTTAAATATATATATATAGCCAACCCGAAGACGCTA  
AATAAACGCATTTTTTTTTTTTTTTTACAGAATTATTACTTTCGTACTTGGGTTTATGCTTCTTATAACAAC  
AACTATGA

ACAGGTACAATGTAACAGAATATGCCTTGGATCCCCAAATTTTTTTGTCTATTTCGTTGTTTTCTTCTCTA  
TGGAAATCGTCGAAAAATTTCTTTGTTTTTTTTTCTTTATTGTTGTTGTCTTTTCGCGAATTCGCGTCG  
CGATTTCGT

GCAGTTGTTGTGCTGACAATAGTCCCATCTAGGTCAAAAAGACAAAGATCTACTGAAAATTGTGGCATT  
TTTTTTTTTATTTTTTTGACGTAAATTTTTTATGTATATAGCAGTAAATGTATCGATAACGTGTTGGCTAAT  
ACTATAGT

TCTATCATTTTTGGAAGAGGAATTAATGCAAAACACATTTGTATTTTTTTTTTTTTTGCATATTCTCGATT  
ATCTATACATATTTTTTAACTGGATCATAAAAGGTATAAAAAGTAATTGATCCATACAACATTTTTTAAATA  
TTTACCCC

GAAGATAACGTAAGACTAAAAAATTTCAAGATTAATTCCTCAACCTATATATATATATATATATATATA  
CTGTTTAGATCAAGTATATCTTCTGCTAAATAATTAATATGCTCGTATGTAGAAAACAAAAAAGAGGTCT  
TTTCTCTT

CCTCAATTTGAAATAAGATTTCGTATTTATTTTGTAAAACGATTTTAGTTTTTATTTTTTTTTTTTTCTTCCC  
TTTTACCTTATTATTTGTTTTACCCTTTATGGATATTCATCCACTCAGAACTAATATATCAAAATCAACG  
ATAAGATC

AATAATCATTTTTTTTTATTTTTTCGCGTTTTTAAAGATAATGTCTTAACCAATTTTTCTAAGTTCGGAACACAAA  
ACCCAATGTTTAAATCATTTTTTAAATAACAATTTAGTATATATATTATTTTTAATTTTTATTAATAATTAATAA  
ATTAAGAAG

TCGCGTTTTTAAAGATAATGTCTTAACCAATTTTTCTAAGTTCGGAACACAAAACCCAATGTTTAAATCATTTT  
TAATAACAATTTAGTATATATATTATTTTTAATTTTTATTAAATTAATTAATAAATTAAGAATTATTAGTCA  
TGTGATTA

GAAAGTATAATACTAATATTGGCAATAATGCTAACACATTACTAATAATAGCAATAATATTAATAATAATA  
ATAATAATAATAAATTATAATAATAGCAGTAATAAAAATATCAAATAATAATAATAGTAATAGTAGTAGTA  
GTAGTAGC

TGAGATACATGTGTATGTATATATGCACGTTTTCTTTTATTATCTAAAAATCATATTATATTAAGTAAGAG  
AAAAAATGTACAACATATAAATATATATTTTATTTAAATGGTTTTTGAATTTTTCTATTCTGGTTGATA  
TTGCCCAA

TACCACACAACGTCTGTAATTTGTTGTCTTTTTTTTTATTTGTGGAAAATTCCTCAATTTGAAATAAGATTC  
GTATTTATTTTTGTAAAACGATTTTAGTTTTTATTTTTTTTTTTTTCTTCCCTTTTACCTTATTATTTGTTTT  
ACCCTTTA

GACGATGTAATGTAACCTGCCGCCTTTTCAGTTTGGCCCCATATATATATATATATAAACAAGACGGATAATTA  
TATCATATTAATGCGATAGCATAAATTTCTCGATGCGCATTGGTAAATTTAGCATGGCGCGAAGTCTCT  
CATGGATA

GGCTTGCAAAATCGCTTGGCCAGAAATAACGAAAAATGAACACTTTTTATTTTTCTTTTGGCTTGTAAACCTA  
AACTTGTACATATGCCCATATATCCTTAAATATATATATATAGCCAACCCGAAGACGCTAAATAAACGCAT  
TTTTTTTT

ACGATTTTCGTTACCTCGGTAAAACCGGCCAAAAAAAAAAAAAAAAAAAAAAAAAAAAAAAAAATGTTCTCAAAGTGT  
AAACTTAATCAAAGCTTATTTGTTTGTATCTGTTTCTCATCGGTTTCGTTTGTGCTTAAAGGGTGGAT  
CGGTCATT

TAACGTTAGAAAATAACAAAAAAAAAAAAAGAAAAAGATAATATAATATAATACCTTTATATATGTGATTT  
ATCTAGCGTCACAGTATGTAATATAAATATCAATGAGTTTCTTAACATGACCTCCAAAACCTACATGATCGC  
TTAGTATT

AATGGGTGAACTTTTTTTTATTTCTTGGCTCATGATTATATTGTAAAATACATAGCATTTTATATAATTGTG  
GTGCTAACCTAAGTACTTTTTTTTTTCGCCCTTCCGGGTTTCTTTTTTTCACCTTTTCGTTTTTCTAGA  
ATTTTCGCA

AAAATTTTTTTTTTTTTAATCGAAAAAAAAAGGAAAAAAAAAGATTAACGTTTCTTTTTCGTTCTATCGTCTTC  
TACGATATCGCATGTAACACAATGCAGCTATCTGATAATATGGTCCCAGAATCGCAATAGCCGGGCAGGCA  
CGCTACTA

TCTAAGATATGTCACAATTCTGTGTATACCATGTACAATTGCTAAATGCTCATTGATTAATTTTAAATTTT  
TCATTTTTTATCGCCTTAGACGAAATTGAAATTTTTCACTGAAAAAAAAAAAAAAAAAAAAAGTAGACGAAGA  
AGCTCATC

GAGAGAGAGAGAGAAAAAAAAAAAAAGAAATATATAGATTTAGGTATTTCGTTAAATATATACACATTAATG  
GCCTCAGAAATTTTAAATATATAAATAAATAAGCTCTTATATGTACAAATTTGTGCATATACTTTTCTTGA  
CCTTTTTA

ACACATGCCCTAGCGCGCGTTCGCGGATTAACAAGGTAACAATGGTTAAAGGAAAAATTTTTGTTAAGG  
TGGGTATATTATAGATTGCTAATTGTAAAGTATTAATAGTTTATTAAGTATTAACCTAGAGTTCGCACATG  
CTTTTATT

TAAATATTTTCCCTGGCCGCCACTTTTTTGAGAGGTATGACGACTCTATGTTATATATATATATATATATA  
TATATATATATAGCACAAAATTTTCATGTGATCAATCTACTAGGCGAACACCTAAATTGTTATTTTCCCA  
TGTCTATA

TCCTTTTTTTTTTTTTTTTTTCCCTTGACTTTCTTTTCTTTTATGTACCTATAATGAAAGACTATTTTATAA  
TTAGAGCTATTTAAAAATTATTAATGAGGTTGATGAGTGGATAGAATATTATATTTTTGAAAGCTAAATTAT  
TTCATCAA

ATTGTTGTCTAAACTGCAATTGTTAGATGATTCATAATCCGGTATATTTATTGCCCTCTTTTGTATTTTAC  
AAATAGTAAATATATATAATATCTTGTGATCTACATAAGCTTTTCGCGGGTCTTCAGAAAAATAAAAAGTT  
TTTAAAAG

TTTTCATCCAAACATGCCTTGTCAATAACGAGATTCGCGACGTATTCTTTTAGTATTCTGTTCCTTTTTTT  
TTTTGCTCCGCGCGCACTTGAACATCTTGCATATTTTTCTTTTCTGTTTTTCATCCAGAGTTGTGTTCTAG  
GACTTTCT

TCGCGGATTAACAAGGTAACAATGGTTAAAGGAAAAATTTTTGTTAAGGTGGGTATATTATAGATTGCT  
AATTGTAAAGTATTAATAGTTTATTAAGTATTAACCTAGAGTTCGCACATGCTTTTTATTTTTTTGTTGCTT  
TTCTTAC

TTAATCCGCGGGTGAATTTTCATTTTTATATTTTCCATTTTATAACAGGCCGTCCCTTAAAAACACCGCGT  
AAGAACATAGTTTATACACTTATATAAGTAAAAGGTGTAGTAGTTGGAATGGTAAAGGGCGTATTGTGTG  
TCAATTAT

TTGCACAGGAAAGAAAAATCACCAATACAATACTACTATATTTTTACCCAAGTTAATACGGGAAAGTATATT  
TTCTTTTCCATATTTTTCTTTTTTATTGACGTTTGCATTTTTTATAGAGCAACTAGTAAACAAAAACCGCT  
AGGCCAG

GCGTGTACTCTGAAAATGTTGAAAAATAAGCTGAATGGGGCATTACATGTTTTTCATCCAAACATGCCTTG  
TCAATAACGAGATTCGCGACGTATTCTTTTAGTATTCTGTTCCTTTTTTTTTTTTGCTCCGCGCGCACTTGA  
ACATCTTG

CCTTGTCTTTTCGATGAACTTTTCTATTTGGGTGAGCAGTTTTCTCTTCGAGCTGCAAAAAAGTTTATCG  
CTTCGCGAAAAAATTTAAAGAATTTCAAACGTGTCAGGGCTACTAAATAATTGAACG  
AGGTCTAT

AAAAATTGTATGTATAATGCTTGTCACTTTTTTTATAATTGATATATGTATATGTATATGTATACATACAT  
ATATATAGTTGATTTAGAATTTATTTATATTAACAAAAGACGAAGAGAGGGCAGATAACAATATTTAAAA  
TGTTTACA

GTAATGCTCTGCCAACTATTTTGCACAGGAAAGAAAAATCACCAATACAATACTACTATATTTTACCCAAG  
TTAATACGGGAAAGTATATTTTCTTTCCATATTTTCTTTTTTATTGACGTTTGCATTTTTTAGAGCAAC  
TAGTAAAC

CGTTTTATTACTTATGTAGGAAAAGAGAATGAGGTTTACTAAATTTAAAAGAAATATATAAAAAGCTGATTT  
TTTTCTTTTTTTAAATATTTCCCAAATGCTAATAAATATTTAAATATGGCAAAAAGAAAAAAGGTGTTGT  
TGCGCAGT

TCTTCCCTTAATTTAAAAGATTAGTTTACTTTTTCTGTAGAATGTTAATTAGTTTATTGCATAGAAAATCT  
TTAATACTGAATGACAAAATTTCCACAATTTTTTTTTAAAAAATTATCGACAACGCAGGACTCGAACCTG  
CGCGGGCA

ATTTTAGTTTTTATTTTTTTTTTTTTCTTCCCTTTTACCTTATTATTTGTTTTACCCTTTATGGATATTCAT  
CCACTCAGAACTAATATATCAAAATCAACGATAAGATCACAAGAGGTGAAATAAGAAAAGTAAAAGAAAA  
ATATTTAA

CTTTTCTTTTTTTCTTTTTTTACGATGCATGTATATGTATTTAATAGTAAAATATATTATTAATAGGGG  
AGTGTGGTTGTGTGATTTAGTAGAGTAGTTAGAATAAAAACGACACAGTGGAAAAAAAAGGTATTTTCTT  
TCTTTCTT

TAATAAAAATATCAAATAATAATAATAGTAATAGTAGTAGTAGTAGTAGCAGTTGTAGTAATGATAATAAT  
AATATAATAATAATAATAATAATAGTATAATAATAGTATAAGTAGTTGTAGGTAAAATCTTTGATTTATCT  
TATCTGGT

TGTTAGATGATTCATAATCCGGTATATTTATTGCCCTCTTTTGTATTTTACAAATAGTAAATATATATAAT  
ATCTTGTGATCTACATAAGCTTTTCGCGGGTCTTCAGAAAAATAAAAAGTTTTTTAAAAGAATATACGCTTA  
GCAAAGGA

TTGAAGGAGAAAAATTTGGGCGGGAGCATATTATTGTAATTAATATATACATATATATATATATATATACA  
TCAACCTTACAACATGCGTTTGAATCCTAACTTTGATCTTACCATCAATAACGGTAGTGGCATGACCT  
GCTATATA

TGGTTAGTCTTAGTTTAACTCTCTTGAAGAAGGGTTTTTTTTCAGTTGGTCAACACTCTTTAGAGGTAAAAA  
AAAAAAAAAAAAAAAAAGAGAATTTCTTCATGTAATTTACCATGATTCTACGTTTTTGAAGCAAAAAT  
GAAGATAA

GTGTTTCGGGCCACGAGGCGAAAATTTTTTTTTTTAATCGAAAAAAAAGGAAAAAAGATTAACGTTTC  
TTTTTCGTTCTATCGTCTTCTACGATATCGCATGTAACACAATGCAGCTATCTGATAATATGGTCCCAGAA  
TCGCAATA

GTCGTTTGTTTAACTACGGCGGCTTCTGGTATTACTGAATTTCTTTTTTTTCAATTTAAATCAATTTATT  
ACAGGTAAATCAATCAAACAAATATATATATATATAGTATACAGAACAAACGGTAATTTCTTTTTTTTTTT  
TTCGACGT

ATTACGTACTTTTTCTAAAGATATTAGAAAAAAAAATGTTATGTATCAATATTACTAGGTAAAATACAA  
AAATGCGCTTTTGAAGTATAAATAATACAGTTTTGTTTTAAGAAATGCTATATATGAATTAATAATAAATG  
AAACGAAA

CGACTGTGATTCAGATAATACCTTAAGCGTCGAAACCTCATACCCCCTCATCTGGCTCGGGAGCCAGTATA  
CTATATATATATATATATATATATATATATATAAATTCCTAAAATACTCTCACACAGAAGCACAAATA  
ATGAGTGA

ATTCCTTTTTTTCGCGTACCTTCATTTTTTCTTCTCTGTTCTTTTCTGTATTTGTCGAAAATTTTATATTGA  
TGTATCTTAATTTTTATTTTTAGTATTATTATACTGTAAATGTTTCTTACTGTGTCAAGATTTCCCGTTGCG  
CTATCTTC

TCATAAAGAAAACGTTACTATTATTGTCTTAGGCAACAAAAATCCATGAAAAGAATTTTACCGTTATCGAT  
ACCATTGTATTTATTTTATTTATTTAATTTTTTTTTTTTTTTGGTTTATATCCTGCAAACAACACTTC  
GAATTCAA

AAAAAAAAAAGAGAGAGCCGTACCGCAATAAAATGGACCCTTGTCCGGTCACGTGAGCAAAAATACTATTGC  
CGCCGACGGCCGTAGATAATAACAAAGGAATAAAAAAAAAAAGCGGTAACCTCGCGGAAGCATTGCCGATG  
CTTACCGA

ATAATAGCAGTAATAAAAAATATCAAATAATAATAATAGTAATAGTAGTAGTAGTAGTAGCAGTTGTAGTAA  
TGATAATAATAATATAATAATAATAATAATAATAGTATAATAATAGTATAAGTAGTTGTAGGTAAAAATCTT  
TGATTTAT

GACTAATGAAGGAATGATATTATGTGGTATTACTTTTTTTTTTATCATCACTAGCTTCGGCTAAGCCCTTGC  
ATTTTCAATATTCAATTACCAAATAATATATATATATATATATATATATATGTATGTATGGTATACCTTGTGT  
TACTGATG

CGTCTGTAATTTGTTGTCCTTTTTTTTTATTTGTGGAAAATTCCTCAATTTGAAATAAGATTCGTATTTATTT  
TGTA AACGATTTTAGTTTTATTTTTTTTTTTTTTTCTTCCCTTTTACCTTATTATTTGTTTTACCTTTTATG  
GATATTCA

AATTGGCCGGATTTCCAATGGAAGCGTTAAAAGAAGCCCGCGAAATATTGGGATAACTTTTGAATACAAC  
ATTAATTGTATATAATTTGACATGTAATATAATAAGATGTGGAATCAATTTCCCTGTCTTTTTTTTTTCAAAA  
GCGACTGT

GTCTTCTTCTGCGTGTACTCTGAAAATGTTGAAAAATAAGCTGAATGGGGCATTACATGTTTTTATCCAA  
ACATGCCTTGTCAATAACGAGATTCGCGACGTATTCTTTTAGTATTCTGTTCCCTTTTTTTTTTTTTGCTCCG  
GCGCACTT

CGTCAGTGTA AACATTCAAGTGATTTTAACTTTACGCGGTTGAAGAATGCTGTGTTTCAACTATAAAGCGT  
CAGAAAAGATGGTTTAGCGAAGGCACCATTATGAAGATAGACACATTCTTCTTTTTTTTTTTTTTTTTTTTT  
TTTTTTTTT

GGTCAACCAAAAATCAAAAATTATTAGTAATATCAACATATGTATATTTAATGTATGTAAACAATGATTA  
AATATTAATAAAAATATATCTACATATAAGTATACGCAAATGGGGTTTTTCTTCAAAAATTTGTTTGTCTGG  
TGTTTTCA

AAAGTTTATCGCTTCGCGAAAAAAAAAAAAAAAAAATTTAAAGAATTTCAAAACGTGTCAGGGCTACTAA  
ATAATTGAACGAGGTCTATGAAATAAAATGGGCTGAGAAAATTTCAAGAAAAGGAAATAAGTAAGGGCTA  
TTTAGGGT

CCCTGGCCGCCACTTTTTTGGAGAGGTATGACGACTCTATGTTATATATATATATATATATATATATATATA  
TAGCACAAAATTTTATGTGATCAATCTACTAGGCGAACACCTAAATTTGTTATTTATTTCCATGTCTATATC  
CATTTCAA



CCTTTACAAAAAGCTTATGGGATAGAATTTTAAGGTTAATTCAGGTATTATTTTTATGGCGGTTTCAGGT  
ATTTTACGTAATATTATTATTATATCATTTTTGTAGCAATATATTATTTTTAGCGGTGCTTTATAAAACAA  
TGGATACT

AAATCATTGTATTACGTACTTTTTCTAAAGATATTAGAAAAAAAATGTTATGTATCAATATTACTAGG  
TAAAATACAAAATGCGCTTTTGAAGTATAAATAATACAGTTTTGTTTTAAGAAATGCTATATATGAATTA  
ATAATAAA

GGCCAAGACGGTTGCTTATACATCTATAATCAATGAGCATTATCTATCGCTTTATTATTTATTATTTATTA  
TTATCATTATTATTATTATCATTATTATTACTACCAATACCTTCTATATCCCTGTGATCAGCTAAAAT  
GATTCAAA

GGGACAAAAATTAATAGTGTAAACCGTACTTTGTAGCACCATTTCTTTTTCTTCTAATTTATATAATTAAT  
GAATATATATATTTGGGATAAATAGCCTTTAATGAAATATTAACAGAACTTTTTGCTTGGGCAGCAACAG  
ATTTATAT

ATTTACACTACGCAGCTTAATTAGTAACTGTATAATAGCATTAAAGTTCATTACTTCTTTGTAATTTTTAT  
CTTTTTTTTTTTTTATATAGTTTTTCAGCGCGCAGCAGAGTTTCATTGGAACGCTTCGCACGTTGGAAGAAT  
AGAAGTGT

ACAAATCTATTAACGTTAGAAAATAACAAAAAAGAAAAAGATAATATAATATAATACCTTTATA  
TATGTGATTTATCTAGCGTCACAGTATGTAATATAAATATCAATGAGTTTCTTAACATGACCTCCAAAAT  
ACATGATC

AGTGACACATAATATATAAATGATCGGTTGAGCGCGATATTATATAAGAACATCCATATGAGTATATATCC  
TACCGTGTCTGTTCTCTACAGTGCTTCTTTTATTCAAATTTATTGGTTTTCGTAACCGCCGCGCAGGCACG  
CCGCGCAT

AAGGCAGGATGAAAAATTACGCCAAATAGGCAGGTTTTCAATATTAAGAGTTAAGTATGCAAAATTTACA  
AAAAGTTAATGGTCAAAGTATAACTATAAAAAATATAATAAAACAATAAACAATAAACAATCTCAGAATTGC  
AAAGCTTG

AGAAATATGTGTAATGCTCTGCCAACTATTTTGCACAGGAAAGAAAAATCACCAATACAATACTACTATAT  
TTTACCCAAGTTAATACGGGAAAGTATATTTTCTTTTCCATATTTTTCTTTTTTATTGACGTTTGCATTTT  
TTAGAGCA

GTTGCTTATACATCTATAATCAATGAGCATTATCTATCGCTTTATTATTTATTATTTATTATTATCATTAT  
TATTATTATCATTATTATTATTACTACCAATACCTTCTATATCCCTGTGATCAGCTAAAATGATTCAAATA  
ACTGTCAT

TTCTGACTGGAAAATTTTCGCAGGCAAAAAAAAAAAAAAAAAAAGAAAAGAAAAATCGATGAGCCTGCC  
GTACACAGAGATATAATAAATTTAGAATGCAAGAATGGTATGGCGGTGATGAAGATAATCATTTCCCTGCT  
TTTTTATT

TATCTACATCAAAATGTTTGAATTTTATTTCTTTCTGCCGCTCTCAAATTCCTCTCATTTCTTTTTCTT  
TGTTTTTCTTATTTTACTATATATATATATATATATATATATATAGCCAAAAACAATAACAGACACAG  
TAATTTAG

GCTTTTTTGTGTTCTATTTTCAGGAAAGAAGTGGGAAAAATAATAAAACAATAAATAACTATATAAAAA  
CAAAAACCTAGAATATACCATTAAAGAATTACTATTCTATTCTGTGCTTCACCGTTGCGTCAATAAATGTG  
AAGTTGAT

GTGTATGTATATATGCACGTTTTCTTTTATTATCTAAAAATCATATTATATTAAGTAAGAGAAAAAATGT  
ACAACCTATATAAATATATATTTATTTAAATGGTTTTGAATTTTTCTATTCTGGTTGATATTGCCAAAA  
GCTATTCA

AATAATAGTAATAGTAGTAGTAGTAGTAGCAGTTGTAGTAATGATAATAATAATAATAATAATAATAATA  
ATAGTATAATAATAGTATAAGTAGTTGTAGGTAAAAATCTTTGATTTATCTTATCTGGTTGCAATGCTTCT  
CCCCTCTG

AAGGAATGAACTGAACTATTAATATTTTTCCCTGGCCGCCACTTTTTTGAGAGGTATGACGACTCTATGT  
TATATATATATATATATATATATATATATATAGCACAAAATTTTCATGTGATCAATCTACTAGGCGAACCC  
TAAATTGT

TCCCTTTTTCTATCACGAGGTTACTGAGCCATTGCATGAACGCGCGCCTCGGCGGCTTTTTTTTTCTGC  
TGTGCTGTATAAAAGCGAAAAGTCAGAAGTTACTATTTTGAATAAAAAACCCCTCGAACTGCCATCTCACT  
ACCGAAAA

TCAAGAAAAAGTAAGTAAATAAGAGGGTACGTGATTATAAACAGATACGAGTTTAGCGAATAATACCGTTC  
GCAATCATAACTTTATAAACTCATCTATTACTTACTATTCGACTGGAAAATTTTCGCAGGCAAAAAAAA  
AAAAAAA

CTCAATCGCTCCTCTTGCCCTTCCCTCTTCTTTTTCTTTTTCTTTTTATTTTTTTCTAATTTTTCTATCTTTT  
ATTTCTACTTCTATTATTAATTTGTATCTTCTAATCGTTTTTCCCCTTTATCGAAACATTTCTTCTATTT  
ATATATGT

AGAGTTGCGGAATTGGCCGGATTTCCAATGGAAGCGTTAAAAGAAGCCCGGAAATATTGGGATAACTTTTT  
GAATACAACATTAATTGTATATAATTTGACATGTAATATAATAAGATGTGGAATCAATTTCCCTGTCTTT  
TTTTTCAA

AGAAGAGGAAAAAAAATTTTTACCTCATCGCGGATTGTAAATAGTAAATATAAACTGGCAATTTACTTAG  
TTTTTGAATAAATAATTGTATAGGAATATTATCAGTCGTATAATACAGACGCTTTAGATCTCCGTAGCATC  
ATATCAGA

TATGCCTTGGATCCCCAAATTTTTTGTCTATTCGTTGTTTTCTTCTCTATGGAAATCGTCGAAAAATTT  
CTTTGTTTTTTTTTCTTTTATTGTTGTTGTCTTTTCGCGAATTCGCGTCGCGATTTCGTGGATTGTGATGA  
TAATAGCG

TAATCAGAAGGACCCCGTCTTGTCTAATAGAATGGGTGAACTTTTTTTATTTCTTGGCTCATGATTATATT  
GTAAAATACATAGCATTTTATATAATTGTGGTGCTAACCCCTAAGTACTTTTTTTTTTCGCCCTTCCGGGT  
TTCTTTTT

GGTATATTTATTGCCCTCTTTTGTATTTTACAAATAGTAAATATATATAATATCTTGTGATCTACATAAGC  
TTTCGCGGGTCTTCAGAAAAATAAAAAGTTTTTAAAAGAATATACGCTTAGCAAAGGAATAGACAGATTT  
AGTTTGTA

ATAGTAGTAGTAGTAGTAGCAGTTGTAGTAATGATAATAATAATAATAATAATAATAATAATAATAGTATAAT  
AATAGTATAAGTAGTTGTAGGTAAAAATCTTTGATTTATCTTATCTGGTTGCAATGCTTCTCCCCTCTGAT  
GCCTAATA

GGTTTTAGCCGCCACTTTTACGCGTTAACAGGGTAAGCTATATCAGATGTGACTTTTTTTTTCTACTCA  
TCTAATGTTGTTTTTCGCGTCACATTTTTTGCCAATAAATAAATACATCACAAATGTTCTATATTGTATATT  
CAATGGAA

TCATTTTTTTCTTCGGCGATGAAAAATTTTCAAAAAAAAAAACAGACCTAACAAAAGGGCAAAAGACCTAT  
TATACTATATGACCGAAAAAATTTACGCCCTATTAATAAAGAAGAAACCTAAAGAAGATAAACTAAAAAC  
CCTTCTAA

CACTGGTTACACATTTTCATGAAAAAAAAGAAAAATTGTATGTATAATGCTTGTCACTTTTTTTATAATTG  
ATATATGTATATGTATATGTATACATATATATATAGTTGATTTAGAATTTATTTATATTAACAAAAGA  
CGAAGAGA

CTTTTTTTATTTCTTGGCTCATGATTATATTGTAAAATACATAGCATTTTATATAATTGTGGTGCTAACCC  
TAAGTACTTTTTTTTTTCGCCCTTCCGGGTTTCTTTTTTTTACCTTTTCGTTTTTCTAGAATTTTCGCAA  
GTATATAA

TCTTTTTTTCTTTTGAATAAGTCGCGTTATAAGGACAAAACATTAATAAATAATGTATTGATTCACTGA  
TTTATATATACAGAAGTAAGTACCGGGTACCTAAATATACGCATAAAAGTCTCTTTCTTTTTTTTTTTTT  
TTTTTTTA

TAAATCTCAGCCTAACCCCTTTTACACGAAGTTTTCCCAACAAAAAAAAAAAAAAAAAAAAAAAAAAGA  
AGGGCGGTTGTCTTTGGCATATCGCGAAAATAATAGATCTTATCAAGGGGTTTTTAAGTCATCCTCTGATT  
ATTGGAAG

TGTACACACGTACACGCACAAGCTACAGACGCCACGCGGCCCGGCATTCATATATGTACATACATTTATGC  
ACATATATATATATATATATATATGTATATGTAAATGTATATATACAGCTTGTGATTTTCGCGCGCCGAATGG  
CTGAAAAG

TACACGCACAAGCTACAGACGCCACGCGGCCCGGCATTCATATATGTACATACATTTATGCACATATATAT  
ATATATATATATGTATATGTAAATGTATATATACAGCTTGTGATTTTCGCGCGCCGAATGGGCTGAAAAGCA  
CAGTATAG

CCTAACCCCTTTTACACGAAGTTTTCCCAACAAAAAAAAAAAAAAAAAAAAAAAAAAGAAGGGCGGTTG  
TCTTTGGCATATCGCGAAAATAATAGATCTTATCAAGGGGTTTTTAAGTCATCCTCTGATTATTGGAAGTC  
ATAATCAC

CGTCTCTAGATAAATCTCAGCCTAACCCCTTTTACACGAAGTTTTCCCAACAAAAAAAAAAAAAAAAAAAA  
AAAAAAAAAGAAGGGCGGTTGTCTTTGGCATATCGCGAAAATAATAGATCTTATCAAGGGGTTTTTAAGTCA  
TCCTCTGA

CTGTAAAAATATATATACATATGATTCACGTGAAAATTTTTATATTTTTAATTAATTTTTATAATATTA  
TAAATTATTATAATATTGATATTTAAATTAATAAACAATTATTAATGGTTTTGTTTTCCGAAATGTTTTT  
TATAATTA

TTTTGAATAAGTCGCGTTATAAGGACAAAACATTAATAAATAATGTATTGATTCACTGATTTATATATA  
CAGAAGTAAGTACCGGGTACCTAAATATACGCATAAAAGTCTCTTTCTTTTTTTTTTTTTTTTTTTAGC  
TTCCTACA

TTAAAGAAGAAAAAAAAAGGTTGGTTTTATCACTTCATTAGTCTATTTGAATAATTCATAAAATATTTCTG  
ATTTTTTTTTTTTTTTTTTTTTTTCATATTATTTTAAACGTGACTTTGGCTGCGATTTCATGGTTTTTGCC  
TTATATCT

AGCTACAGACGCCACGCGGCCCGGCATTCATATATGTACATACATTTATGCACATATATATATATATATAT  
ATGTATATGTAAATGTATATATACAGCTTGTGATTTTCGCGCGCCGAATGGGCTGAAAAGCACAGTATAGTG  
GAGAAGAA

TTACACGAAGTTTTCCCAACAAAAAAAAAAAAAAAAAAAAAAAAAAGAAGGGCGGTTGTCTTTGGCAT  
ATCGCGAAAATAATAGATCTTATCAAGGGGTTTTTAAGTCATCCTCTGATTATTGGAAGTCATAATCACGT  
TCAATGGT

GTACCGGGGTACCTAAATATACGCATAAAAGTCTCTTTCTTTTTTTTTTTTTTTTTTTAGCTTCCTACAT  
TTCGTTAATAATATTATATAGATTATATTTATATTTAAGAAAAGTAATATCAGCATATTATGAATAGACAA  
AAAAGTCT

CGAAGGCTAGCGTCTCTAGATAAATCTCAGCCTAACCCCTTTTACACGAAGTTTTCCCAACAAAAAAAAAAA  
AAAAAAAAAAAAAAAAAGAAGGGCGGTTGTCTTTGGCATATCGCGAAAATAATAGATCTTATCAAGGGG  
TTTTAAGT

TATATATACATATGATTCACGTGAAAATTTTTATATTTTTTAATTAATTTTTATAATATTATAAAATTATTA  
TAATATTGATATTTAAAATTTAAAACAAATTATTAATGGTTTTGTTTTCCGAAATGTTTTTATAATTATT  
ACTTCAGA

GATACTTTTTCTGTAAAAAATATATATACATATGATTCACGTGAAAATTTTTATATTTTTTAATTAATTTTT  
TATAATATTATAAAATTATTATAATATTGATATTTAAAATTTAAAACAAATTATTAATGGTTTTGTTTTCCG  
AAATGTTT

TCAAAGTAAATGGAGAATTTTGAAGGCTAGCGTCTCTAGATAAATCTCAGCCTAACCCTTTTACACGAAGT  
TTTCCCAACAAAAAAAAAAAAAAAAAAAAAAAAAAAAAAAAAAGAAGGGCGGTTGTCTTTGGCATATCGCGAAAAT  
AATAGATC

TTATATAACTGTAGAACCAGTTTAGTTTTCTTGTGTCTTTCTCTAATTAGAGTCATCTTAAGAATATTT  
TTCCACGGGAAAAAAGTGAAAAAAAAAAAAAAAAAAAAAAAAAAGAGTGGGAATTTTCAGTGCAGTTGAAA  
AAATCGAG

TGGCAATGCTTCAAAGTAAATGGAGAATTTTGAAGGCTAGCGTCTCTAGATAAATCTCAGCCTAACCCTTTT  
TACACGAAGTTTTTCCCAACAAAAAAAAAAAAAAAAAAAAAAAAAAGAAGGGCGGTTGTCTTTGGCATA  
TCGCGAAA

AAAAAAAAAAAAAAAAAAAAAAAAAAGAAGGGCGGTTGTCTTTGGCATATCGCGAAAATAATAGATCT  
TATCAAGGGTTTTTAAGTCATCCTCTGATTATTGGAAGTCATAATCACGTTCAATGGTGGGAGGCCTTCG  
GAAAAGAA

GTCGCGTTATAAGGACAAAACATTAATAAATATGTATTGATTCACTGATTTATATATACAGAAGTAAG  
TACCGGGTACCTAAATATACGCATAAAAGTCTCTTTCTTTTTTTTTTTTTTTTTTTTTTTAGCTTCTACATT  
TCGTTAAT

CAATTTTTTTAAAAAAAACCTCAATACCTACATCACCGGAAATGCCTGAAGTAAAAGCATATAACAAACG  
CGACCCTTAAAATTACGTATATATATGTATATTTCTTTATACTAAGTTTTACTGGGCAGAGTATCATAACG  
TTCTTCTA

AAAAAAAAGGTTGGTTTTATCACTTCATTAGTCTATTTGAATAATTCATAAAATATTTCTGATTTTTTTTT  
TTTTTTTTTTTTTTTTCATATTATTTTAAACGTGACTTTGGCTGCGATTGATGGTTTTTGCCTTATATCTTC  
GTTGTCAT

TGGAGAATTTTGAAGGCTAGCGTCTCTAGATAAATCTCAGCCTAACCCTTTTACACGAAGTTTTTCCCAACA  
AAAAAAAAAAAAAAAAAAAAAAAAAAGAAGGGCGGTTGTCTTTGGCATATCGCGAAAATAATAGATCTT  
ATCAAGGG

ACAATATACCTTAAAGAAGAAAAAAAAAAGGTTGGTTTTATCACTTCATTAGTCTATTTGAATAATTCATAA  
AATATTTCTGATTTTTTTTTTTTTTTTTTTTTTTTTCATATTATTTTAAACGTGACTTTGGCTGCGATTGATG  
GTTTTTGC

TTTTCCCAACAAAAAAAAAAAAAAAAAAAAAAAAAAGAAGGGCGGTTGTCTTTGGCATATCGCGAAAA  
TAATAGATCTTATCAAGGGTTTTTAAGTCATCCTCTGATTATTGGAAGTCATAATCACGTTCAATGGTGG  
GAGGCCTT

GCCACGCGGCCCGGCATTTCATATATGTACATACATTTATGCACATATATATATATATATATATATATATGTATATGT  
AAATGTATATATACAGCTTGTGATTTTCGCGCGCCGAATGGGCTGAAAAGCACAGTATAGTGGAGAAGAAGA  
GAGAGGAG

ACCTAAATATACGCATAAAAGTCTCTTTCTTTTTTTTTTTTTTTTTTTTTTTAGCTTCTACATTTTCGTTAATA  
ATATTATATAGATTATATTTTATATTTAAGAAAAGTAATATCAGCATATTATGAATAGACAAAAAGTCTAA  
GGTCAAGA

GTCTCTTTCTTTTTTTTTTTTTTTTTTTTTTTTTTTTTTTTTAGCTTCCTACATTTTCGTTAATAATATTATATAGATTATATTT  
ATATTTAAGAAAAGTAATATCAGCATATTATGAATAGACAAAAAAGTCTAAGGTCAAGATTTATTTAAATGT  
TAGATTAT

ACGCATAAAAGTCTCTTTCTTTTTTTTTTTTTTTTTTTTTTTTTTTTTTTTTAGCTTCCTACATTTTCGTTAATAATATTATATA  
GATTATATTTATATTTAAGAAAAGTAATATCAGCATATTATGAATAGACAAAAAAGTCTAAGGTCAAGATT  
TATTTAAAT

GGAGTGGGACGAAAAGATCTCGCTTTTGTCTCACGCGCAATGCTATAAATAATAAATATACATATATATAT  
ATTTATATGTAGATAGATGTGTGTATATATATGCTAGGTAAAGAAACGGAAAAATCGAAAAATCGAAGTTG  
GAGAGGAA

TAAGAAGTATGATACTTTTTCTGTAAAAAATATATATACATATGATTCACGTGAAAATTTTTATATTTTTTA  
ATTTAAATTTTTATAATATTATAAATTATTATAATATTGATATTTAAAATTTAAAAACAAATTATTAATGGTT  
TTGTTTTTC

TATTTTTACGCGTCACTGCGAACGGATGAATATTGCCAATGACTGCTGCGCACTCTTAAAAAATATAATGA  
CAATTATAATAAGAAGTATGATACTTTTTCTGTAAAAAATATATATACATATGATTCACGTGAAAATTTTT  
ATATTTTTT

ACAATTATAATAAGAAGTATGATACTTTTTCTGTAAAAAATATATATACATATGATTCACGTGAAAATTTTT  
TATATTTTTTAATTTAAATTTTTATAATATTATAAATTATTATAATATTGATATTTAAAATTTAAAAACAAATT  
ATTAATGG

ACAGAAGTAAGTACCGGGGTACCTAAATATACGCATAAAAGTCTCTTTCTTTTTTTTTTTTTTTTTTTTTTTAG  
CTTCTACATTTTCGTTAATAATATTATATAGATTATATTTATATTTAAGAAAAGTAATATCAGCATATTAT  
GAATAGAC

TATGATTCACGTGAAAATTTTTATATTTTTTAATTTAAATTTTTATAATATTATAAATTATTATAATATTGAT  
ATTTAAAATTTAAAAACAAATTATTAATGGTTTTGTTTTCCGAAATGTTTTTTATAATTACTTTCAGAAT  
AGTTATTTT

TGATCAATGCGGAGTGGGACGAAAAGATCTCGCTTTTGTCTCACGCGCAATGCTATAAATAATAAATATAC  
ATATATATATATTTATATGTAGATAGATGTGTGTATATATATGCTAGGTAAAGAAACGGAAAAATCGAAAA  
ATCGAAGT

ATTCATACAATATACTTTAAGAAAACAATATACTTTTTCTTAGTTTCATAACTTTGGAATCTATAATGTTGTT  
TTTTTTTTTTTTAAGTATATTTGTATATTATGCATATAAGTCAACGCGTAGCGGTGGTATTACGCGCAAGCT  
TTTGATTT

AAAACAATATACTTTTTCTTAGTTTCATAACTTTGGAATCTATAATGTTGTTTTTTTTTTTTTTTTAAGTATATT  
TGTATATTATGCATATAAGTCAACGCGTAGCGGTGGTATTACGCGCAAGCTTTTGATTTCTCTTACTATTC  
TTGGTTGT

TAAGAATATTTTTCCACGGGAAAAAAGTGAAAAAAAAAAAAAAAAAAAAAAAAAAAAAAAAAAGAGTGGAATTTTCAG  
TGCAGTTGAAAAAATCGAGGTGGAATTTGAGAACGACAATTACTTAGCACTACATGTGTTGTTCTCGTTTTG  
TTTTTAAT

GCATGGGACTTCTTTTTTTCTTTTTGAATAAGTTCGCGTTATAAGGACAAAACATTTAAAAAATATGTATT  
GATTCAGTATTTATATATACAGAAGTAAGTACCGGGGTACCTAAATATACGCATAAAAGTCTCTTTCTTTT  
TTTTTTTTT

GTATCAAGAGAGAAATATGTGAATGACGAGCAAACCTAGAGGTGTTATTAATAATAATGGCATAAAAACTAG  
ATTTTATTTCTATATATATATATATATATTTCTTCGACTTTTTTTTTTTTTTACCCGCACACCCTGAATTTTG  
TGCTATTTT

AGAAATATGTGAATGACGAGCAAACCTAGAGGTGTTATTAATAATAATGGCATAAAAACTAGATTTTTATTCT  
ATATATATATATATATATATTTCTTCGACTTTTTTTTTTTTTTTTACCCGCACACCCTGAATTTTGTGCTATTTTG  
AAGCAGAG

TGTTGAAGTGTGTACACACGTACACGCACAAGCTACAGACGCCACGCGGCCCGGCATTCATATATGTACAT  
ACATTTATGCACATATATATATATATATATATATGTATATGTAAATGTATATATACAGCTTGTGATTTTCGCGC  
GCCGAATG

TATACTTAAGAAAACAATATACTTTTCTTAGTTCATAACTTTGGAATCTATAATGTTGTTTTTTTTTTTTTT  
TAAGTATATTTGTATATTATGCATATAAGTCAACGCGTAGCGGTGGTATTACGCGCAAGCTTTTGATTTCT  
CTTACTAT

TCCTCTAATTAGAGTCATCTTAAGAATATTTTTCCACGGGAAAAAAGTGAAAAAAAAAAAAAAAAAAAAAAAA  
AAAAGAGTGGGAATTTTCAGTGCAGTTGAAAAAATCGAGGTGGAATTTGAGAACGACAATTACTTAGCACT  
ACATGTGT

AGAGTCATCTTAAGAATATTTTTCCACGGGAAAAAAGTGAAAAAAAAAAAAAAAAAAAAAAAAAAGAGTGG  
GAATTTTCAGTGCAGTTGAAAAAATCGAGGTGGAATTTGAGAACGACAATTACTTAGCACTACATGTGTTG  
TTCTCGTT

AAGGACAAAACATTAATAAAAAAAAAATATGTATTGATTCACTGATTTATATATACAGAAGTAAGTACCGGGTA  
CCTAAATATACGCATAAAAGTCTCTTTCTTTTTTTTTTTTTTTTTTTTTTTAGCTTCTACATTTTCGTTAATAA  
TATTATAT

CAAACAATGTCAATTTTTTTTTAAAAAAAAACTCAATACCTACATCACCGCGAAATGCCTGAAGTAAAAGCAT  
ATAACAAACGCGACCCTTAAAATTACGTATATATATGTATATTTCTTTATACTAAGTTTTACTGGGCAGAG  
TATCATAC

ATTGCGTCGAACAATATACCTTAAAGAAGAAAAAAAAAAGGTTGGTTTTATCACTTCATTAGTCTATTTGAA  
TAATTCATAAAATATTTCTGATTTTTTTTTTTTTTTTTTTTTTTTTTTTCATATTATTTTAAACGTGACTTTGGCT  
GCGATTCA

TTTAGTTTTCTTGTTGTTCTTTCTCTAATTAGAGTCATCTTAAGAATATTTTTCCACGGGAAAAAAGTGAA  
AAAAAAAAAAAAAAAAAAAAAAAAAAGAGTGGGAATTTTCAGTGCAGTTGAAAAAATCGAGGTGGAATTTGAG  
AACGACAA

GTAGAACCAGTTTAGTTTTCTTGTTGTTCTTTCTCTAATTAGAGTCATCTTAAGAATATTTTTCCACGGGA  
AAAAAGTGAAAAAAAAAAAAAAAAAAAAAAAAAAGAGTGGGAATTTTCAGTGCAGTTGAAAAAATCGAGGT  
GGAATTTG

TTTCCACGGGAAAAAAGTGAAAAAAAAAAAAAAAAAAAAAAAAAAGAGTGGGAATTTTCAGTGCAGTTGAA  
AAAATCGAGGTGGAATTTGAGAACGACAATTACTTAGCACTACATGTGTTGTTCTCGTTTTGTTTTTAATTA  
TATACAGG

AAAAAAAAACTCAATACCTACATCACCGCGAAATGCCTGAAGTAAAAGCATATAACAAACGCGACCCTTAA  
AATTACGTATATATATGTATATTTCTTTATACTAAGTTTTACTGGGCAGAGTATCATACAGTTCTTCTATC  
CGATATAT

TCTATAGTATGTATCAAGAGAGAAATATGTGAATGACGAGCAAACCTAGAGGTGTTATTAATAATAATGGCA  
TAAAACTAGATTTTTATTCTATATATATATATATATATTTCTTCGACTTTTTTTTTTTTTTTACCCGCACACC  
CTGAATTT

TAAGATGTCCTTATATAACTGTAGAACCAGTTTAGTTTTCTTGTTGTTCTTTCTCTAATTAGAGTCATCTT  
AAGAATATTTTTCCACGGGAAAAAAGTGAAAAAAAAAAAAAAAAAAAAAAAAAAGAGTGGGAATTTTCAGT  
GCAGTTGA

AAACAGGAAATATTGCCTATTTTTCGTACAAGGTTACTTCCTAGATGCTATATGTCCCTTTACATAATAAAT  
TAAAAAATTTTTTTTATAAATTATAATAATTTCTTTTTATTTCTAATAGTATCTTGGGATTAATAAATCA  
CTTACAAT

GTGAAAATTTTTATATTTTTAATTAATTTTTATAATATTATAAATTATTATAATATTGATATTTAAAATT  
AAAAACAAATTATTAATGGTTTTGTTTTCCGAAATGTTTTTTATAATTACTTTCAGAATAGTTATTTTTC  
ACGAATAC

GAAAAGATCTCGCTTTTTGTCTCACGCGCAATGCTATAAATAATAAATATACATATATATATATTTTATATGT  
AGATAGATGTGTGTATATATATGCTAGGTAAAGAAACGGAAAAATCGAAAAATCGAAGTTGGAGAGGAAAA  
ACAAGACA

CATAATATTAATTCATACAATATACTTAAGAAAACAATATACTTTTTCTTAGTTTTTCATAACTTTGGAATCTA  
TAATGTTGTTTTTTTTTTTTTAAGTATATTTGTATATTATGCATATAAGTCAACGCGTAGCGGTGGTATTA  
CGCGCAAG

ACTTTTCTTAGTTTTTCATAACTTTGGAATCTATAATGTTGTTTTTTTTTTTTTAAGTATATTTGTATATTAT  
GCATATAAGTCAACGCGTAGCGGTGGTATTACGCGCAAGCTTTTGATTTCTCTTACTATTCTTGGTTGTTT  
ATTTGTTA

ACACTTCATGATTGCGTCGAACAATATACCTTAAAGAAGAAAAAAAAAAGTTGGTTTTATCACTTCATTAG  
TCTATTTGAATAATTCATAAAATATTTCTGATTTTTTTTTTTTTTTTTTTTTTTTTCATATTATTTTAAACGT  
GACTTTGG

CTAAATCAGTTAAGATGTCCTTATATAACTGTAGAACCAGTTTAGTTTTCTTGTGTTCTTTCTCTAATTA  
GAGTCATCTTAAGAATATTTTTCCACGGGAAAAAAGTAAAAAAAAAAAAAAAAAAAAAAAAAAGAGTGGG  
AATTTTCA

AAATATAATGACAATTATAATAAGAAGTATGATACTTTTTCTGTAAAAAATATATATACATATGATTCACG  
TGAAAATTTTTATATTTTTAATTAATTTTTATAATATTATAAATTATTATAATATTGATATTTAAAATTA  
AAAACAAA

GAATGACGAGCAAACCTAGAGGTGTTATTAATAATAATGGCATAAAAACTAGATTTTATTCTATATATATAT  
ATATATATTTCTTCGACTTTTTTTTTTTTTTACCCGCACACCCTGAATTTTGTGCTATTTTGAAGCAGAGCG  
TACTGAAC

TTTTTTTTTTTTTTTTTTTTAGCTTCTACATTTGTTAATAATATTATATAGATTATATTTATATTTAAGA  
AAAGTAATATCAGCATATTATGAATAGACAAAAAAGTCTAAGGTCAAGATTTATTAATGTTAGATTATTA  
AGATTACA

CTTCATTCTCTTTCAATTTGGTAGTGAGATGGCAGTTTCGAGGTTTTTTTTATTCAAAGTAATAACTTCTTCT  
TTTTCGCTTTTATGTAGCAGAAAAAAGCCGCCGAAGCGCGCGCTTCGTGCAATCTCATGATAGAAAAAG  
GGCAACAA

CAAAATTCGTGGCTCAGTGCTCTCAAGACAATGTTGCAACCCTTTGCGTCAATTATATATATATATATATA  
TATATATATATCCCGTCCGCTTTCTTTTTTTTTGTGAGTTGGGTGCAACGCAGGGTCTCGAGACCTGAAA  
AAGCTTCA

GTATTCCAAACCAATTTAAGTAAGTATTGATATGTAGTTATTTTTAAAATAAATATATGTAAGTATATTTG  
GATGCTTTAATTAGGAATGTTCTATTTTTTTTTTTTTTTTTTATATTATGGAAGAAAATGGACGTGACGAAT  
CAATAAAA

GCAATAATGACAAGATTTTTGCATGGGACTTCTTTTTTTCTTTTGAATAAGTCGCGTTATAAGGACAAAAC  
ATTAATAAATAATATGATTGATTCATGATTTATATATACAGAAGTAAGTACCGGGTACCTAAATATAC  
GCATAAAA

TCTAGTGCATGGCAATGCTTCAAAGTAAATGGAGAATTTTGAAGGCTAGCGTCTCTAGATAAATCTCAGC  
CTAACCTTTTACACGAAGTTTTCCCAACAAAAAAAAAAAAAAAAAAAAAAAAAAAAAAAAAAGAAGGGCGGTTGT  
CTTTGGCA

TCAACCTCGCCAAACAATGTCAATTTTTTTTTAAAAAACTCAATACCTACATCACCGCGAAATGCCTGAA  
GTAAAAGCATATAACAAACGCGACCCTTAAAATTACGTATATATATGTATATTTCTTTATACTAAGTTTTA  
CTGGGCAG

AAGTACTTCAAGGAGACGTTATATAAGCTGGCCAATGAATAAATAGATTAATTTAAACAGTATATGTACAG  
TTTTATATATATATATATATATATATACATATATAAAGAAACCTGTGCGTTTTTTGTATTTTCAAATACAT  
TTAGTTTT

GTTTCATAACTTTGGAATCTATAATGTTGTTTTTTTTTTTTTTAAGTATATTTGTATATTATGCATATAAGT  
CAACGCGTAGCGGTGGTATTACGCGCAAGCTTTTGATTTCTTACTATTCTTGTTGTTTCATTTGTTATT  
TTTCTTTT

CAAGATTTTTGCATGGGACTTCTTTTTTTCTTTTGAATAAGTCGCGTTATAAGGACAAAACATTAAAAAA  
AATATGTATTGATTCACTGATTTATATATACAGAAGTAAGTACCGGGTACCTAAATATACGCATAAAAGT  
CTCTTTCT

AATATAAACAAAAACCGCAACACTTCATGATTGCGTCGAACAATATACCTTAAAGAAGAAAAAAAAAAGGT  
TGGTTTTATCACTTCATTAGTCTATTTGAATAATTATAAAATATTTCTGATTTTTTTTTTTTTTTTTTTT  
TTTCATAT

TTAGGATATACCTCGAAAATAATAAACCGCCACACTGTCATTATTATAAATTAGAAACAGAACGCAAAAATT  
ATCCACTATATAAATCAAAGACGCGAAAAAAAAAAGAACAACGCGTCATAGAACTTTTGGCAATTCGCGTCA  
CAAATAAA

ATGTCCCTTTACATAATAAATTAATAAATTTTTTTTTATAAATTATAAATAATTTCTTTTTATTTCTAATAGT  
ATCTTGGGATTAATAAATCACTTACAATATTTATTTTATTATATTGCTTTGTTCAATTAATTTTAATAC  
GAAATTAT

CCTCAGAATAAACAAAGGTCATCTAGTGCATGGCAATGCTTCAAAGTAAATGGAGAATTTTGAAGGCTAGC  
GTCTCTAGATAAATCTCAGCCTAACCTTTTACACGAAGTTTTCCCAACAAAAAAAAAAAAAAAAAAAAA  
AAAAAAG

ATAAATGCTTACGAACACCGTCATTGATCAAATAGGTCTATAATATTAATATACATTTATATAATCTAC  
GGTATTTATATCATCAAAAAAAGTAGTTTTTTATTTATTTTATTTTGTTCGTTAATTTTCAATGTCTATG  
GAAGCCCG

GGCTCAGTGCTCTCAAGACAATGTTGCAACCCTTTGCGTCAATTATATATATATATATATATATATATA  
TCCCGTCCGCTTTCTTTTTTTTTGTCAGTTGGGTCGCAACGCAGGGTCTCGAGACCTGAAAAAGCTTCATA  
CGATATT

ACATTTGATAAAGTACTTCAAGGAGACGTTATATAAGCTGGCCAATGAATAAATAGATTAATTTAAACAGT  
ATATGTACAGTTTTATATATATATATATATATATATACATATATAAAGAAACCTGTGCGTTTTTTGTATTT  
TCAAATAC

AATCTGCGTCAAACAGGAAATATTGCCTATTTTCGTACAAGGTTACTTCCTAGATGCTATATGTCCCTTTA  
CATAATAAATTAATAAATTTTTTTTTATAAATTATAAATAATTTCTTTTTATTTCTAATAGTATCTTGGGATT  
AAATAAAT

GATTTTTTTTTTTTTTTTTTTTTTTTTCATATTATTTTAAACGTGACTTTGGCTGCGATTTCATGGTTTTTGCC  
CTTATATCTTTCGTTGTCATTATTATCAGCATTATTAGGATAATCCTTTCCATGTAATAGAAAACCTTTTATT  
TTTCAACA



GATAGTCGCGTATACATAAATAACAAAAAACAAATTCAATAACATAAAAATAAAAATACTTTTACATACAG  
AAGAAGAACTTTATATATTCGACAAAGGAAAATGTAAAAAATAACACATTATTTTAAAAGAACTGCG  
CTCATTAT

TGTTGTTCTTTCTCTAATTAGAGTCATCTTAAGAATATTTTTCCACGGGAAAAAAGTGAAAAAATAA  
AAAAAATAAAGAGTGGAATTTTCAGTGCAGTTGAAAAATCGAGGTGGAATTTGAGAACGACAATT  
ACTTAGCA

CGTCACTGCGAACGGATGAATATTGCCAATGACTGCTGCGCACTCTTAAAAAATAAATGACAATTATAAT  
AAGAAGTATGATACTTTTTCTGTAAAAATATATATACATATGATTCACGTGAAAATTTTATATTTTAA  
TTAAATTT

CACTCTTAAAAAATAAATGACAATTATAATAAGAAGTATGATACTTTTTCTGTAAAAATATATATACAT  
ATGATTCACGTGAAAATTTTATATTTTAAATTTTATAATATTATAAATTATTATAATATTGATA  
TTTAAAT

ATTTATATATACAGAAGTAAGTACCGGGGTACCTAAATATACGCATAAAAGTCTCTTTCTTTTTTTTTTT  
TTTTTTTTAGCTTCCTACATTTTCGTTAATAATATTATATAGATTATATTTATATTTAAGAAAAGTAATATC  
AGCATATT

CAAAGTAGAGGTGTTATTAATAATAATGGCATAAAACTAGATTTTATTCTATATATATATATATATATTT  
CTTCGACTTTTTTTTTTTTTACCCGCACACCCTGAATTTTGTGCTATTTTGAAGCAGAGCGTACTGAACAA  
ATTGGCAG

TTTTCGTACAAGGTTACTTCCTAGATGCTATATGTCCCTTTACATAATAAATTAAAAAATTTTTTTTATAAA  
TTATAATAATTTCTTTTTATTTCTAATAGTATCTTGGGATTAATAAATCACTTACAATATTTATTTTATT  
ATATTGCT

TAGATGCTATATGTCCCTTTACATAATAAATTAAAAAATTTTTTTTATAAATTATAATAATTTCTTTTTAT  
TTCTAATAGTATCTTGGGATTAATAAATCACTTACAATATTTATTTTATTATATTGCTTTGTTCAATTAA  
ATTTTAAT

CATTTTTTTTTTTGTTTCATGATGTTAGCATCTGCTTAGTCTTTTTAAAATTATTTAATTTAACGTTTTATTT  
ATGTGAACCTTTTTTTTATTAGTTGTATTTACTATTTATTCAAGAATCATTCTTTACTTTATATTGATATCG  
TTTTTTTC

AAAAAAAAAAAAAAAAAAGAAGGGCGGTTGTCTTTGGCATATCGCGAAAATAATAGATCTTATCAAGGGG  
TTTTTAAGTCATCCTCTGATTATTGGAAGTCATAATCACGTTCAATGGTGGGAGGCCTTCGAAAAGAAAA  
GAAAAGAA

ACGGAGCTTTATAGTAATTAGTCAAGGTTTTTTTTTTCTTATTTTTTTCTATTTTATAAATTAGTCATATC  
AAAATATATCTATTAATTTATTTTCCATATATACGTAGATATTTCTTCATTTGCATAATTTCTTTGGGAAAA  
GGAAAACA

TGGCTACAGCACTTGCTGAACATAAGCTTAAAACGTTTATGTGTGTATTTATATATGATAATAATAAAT  
AATAATAATAATAATAATAATAATAATAATAATAATAATAATAATGGTGATAAACTGCAATAACAAAAGAA  
AATAGTAC

CGCTTTTGTCTCACGCGCAATGCTATAAATAATAAATATACATATATATATATTTTATATGTAGATAGATGT  
GTGTATATATATGCTAGGTAAAGAAACGGAAAAATCGAAAAATCGAAGTTGGAGAGGAAAAACAAGACATC  
AGGCCCGC

GCCAATGAATAAATAGATTAATTTAAACAGTATATGTACAGTTTTATATATATATATATATATATATACAT  
ATATAAAGAACTGTGCGTTTTTTGTATTTTCAAATACATTTAGTTTTGGCGCCACTTCTATAAAAGGTC  
TCATGATA

TATTGCCTATTTTCGTACAAGGTTACTTCCTAGATGCTATATGTCCCTTTACATAATAAAATTAATAAATTT  
TTTTTATAAATTATAATAATTTCTTTTTATTTCTAATAGTATCTTGGGATTAATAAATCACTTACAATAT  
TTATTTTA

ATGAATAAACTCTATAGTATGTATCAAGAGAGAAATATGTGAATGACGAGCAAACCTAGAGGTGTTATTAAT  
AATAATGGCATAAAAACTAGATTTTATTCTATATATATATATATATATTTCTTCGACTTTTTTTTTTTTTTA  
CCCGCACA

TCAAGGAATGCAAAATTCGTGGCTCAGTGCTCTCAAGACAATGTTGCAACCCTTTGCGTCAATTATATATA  
TATATATATATATATATATATCCCGTCCGCTTTCTTTTTTTTTTGTGAGTTGGGTCGCAACGCAGGGTCTCGA  
GACCTGAA

GTCAAGGTTTTTTTTTTCTTATTTTTTTCTATTTTCATAACTTAGTCATATCAAAATATATCTATTAAATTA  
TTTTCCATATATACGTAGATATTCTTCATTTGCATAATTCTTTGGGAAAAAGGAAAACAGTTATAGAAAA  
TATAACA

AAAAACCGCAACACTTCATGATTGCGTCGAACAATATACCTTAAAGAAGAAAAAAAAAAGGTTGGTTTTATC  
ACTTCATTAGTCTATTTGAATAATTCATAAAATATTTCTGATTTTTTTTTTTTTTTTTTTTTTTTCATATTA  
TTTTAAAC

TTGGTTTTATCACTTCATTAGTCTATTTGAATAATTCATAAAATATTTCTGATTTTTTTTTTTTTTTTTTTT  
TTTTCATATTATTTTAAACGTGACTTTGGCTGCGATTGATGTTTTTGCCTTATATCTTCGTTGTCATTA  
TTATCAGC

CATTAATAAATAATATGTATTGATTCACTGATTTATATATACAGAAGTAAGTACCGGGGTACCTAAATATA  
CGCATAAAAGTCTCTTTCTTTTTTTTTTTTTTTTTTTTTTTAGCTTCCTACATTTTCGTTAATAATATTATAG  
ATTATATT

TGATTCACTGATTTATATATACAGAAGTAAGTACCGGGGTACCTAAATATACGCATAAAAGTCTCTTTCTT  
TTTTTTTTTTTTTTTTTTAGCTTCCTACATTTTCGTTAATAATATTATATAGATTATATTTTATATTTAAGAA  
AAGTAATA

ATATAAGCTGGCCAATGAATAAATAGATTAATTTAAACAGTATATGTACAGTTTTATATATATATATATAT  
ATATATACATATATAAAGAAACCTGTGCGTTTTTTGTATTTTCAAATACATTTAGTTTTGGCGCCACTTCT  
ATAAAAGG

TAAATGTAGTGAGTTGGCTTTTGTTCGTGCTGTTTTCGATGAACTATTAATCCCAAATTTATGTAGTAAT  
AATCACTAAAAATGCGAAGAGGAAATATTAACGCGCGGCGCAAAAAGATCGGGTAATTTGGGCGTTAAG  
TACATGAA

TGTAACATATTTAGGATATACCTCGAAAATAATAAACCGCCACACTGTCATTATTATAATTAGAAACAGAA  
CGCAAAAATTATCCACTATATAATTCAAAGACGCGAAAAAAAAGAACAACGCGTCATAGAACTTTTTGGCA  
ATTCGCGT

TTGGCAGAAGAGGGAACCATTTTCATCCAAAAAATAAAAAAATAAAAAAATCCAAATATTAAGCTAAAA  
AAATACTTAACTGTTTACACAAAGCGTATATAAAATGCATATTAAGAACCCTATCTCGTTTCAGAGGAATAA  
ACTTTTTAA

AACAAGGTCATCTAGTGCGATGGCAATGCTTCAAAGTAAATGGAGAATTTTGAAGGCTAGCGTCTCTAGAT  
AAATCTCAGCCTAACCTTTTACACGAAGTTTTCCCAACAAAAAAAAAAAAAAAAAAAAAAAAAAAAAGAA  
GGGCGGTT

AAATATTTCTGATTTTTTTTTTTTTTTTTTTTTTTTCATATTATTTTAAACGTGACTTTGGCTGCGATTGAT  
GGTTTTTGCCTTATATCTTCGTTGTCATTATTATCAGCATTATTAGGATAATCCTTTCCATGTAATAGAA  
AACTTTTA

AAAAAAGTGAAAAAAAAAAAAAAAAAAAAAAAAAAGAGTGGGAATTTTCAGTGCAGTTGAAAAATCGAGG  
TGGAATTTGAGAACGACAATTACTTAGCACTACATGTGTTGTTCTCGTTTGTAAAAATTATATACAGGTT  
GGTTAGGT

TTCGAGGTACCAAAGTATAGATAGTCGCGTATACATAAATAACAAAAAACAAATTCATAACATAAAAT  
AAAAACTTTTTACATACAGAAGAAGAACTTTATATATTCGACAAAGGAAAATGTAAAAAAAAAAAAACAC  
ATTATTTT

CGGAATCTGCTAAAATGTAGTGAGTTGGCTTTTTGTTTCGTGCTGTTTTTCGATGAACTATTAATCCCAAATTT  
ATGTAGTAATAATCACTAAAAATGCGAAGAGGAAATATTAACGCGCGGCGCAAAAAGATCGGGTAATTTG  
GGCGTTTA

ACTTGCTGAACATAAGCTTAAAACGTTTATGTGTGATTTTATATATGATAATAATAATAATAATAATA  
ATAATAATAATAATAATAATAATAATAATAATAATAATAATAATAATAATAATAATAATAATAATAATA  
ATCCTGGA

ATCTCTGGTGTTCGAGGTACCAAAGTATAGATAGTCGCGTATACATAAATAACAAAAAACAAATTCAT  
AACATAAAATAAAAACTTTTTACATACAGAAGAAGAACTTTATATATTCGACAAAGGAAAATGTAAAA  
AAAAAAC

AAAATAAAATAAAAAATGTATGATTTCCCTCCATTTCCGACCAATTGTATAATTTTTATATCTGCATGACTTA  
ATAATATAATAATAACTTTATAAAATACGAATAGAAAAATTTAAACCGATGTAATGCATCCTTTTCTTTGT  
CGTCTTCG

CCCTTCTCAAGTATTCCAAACCAATTTAAGTAAGTATTGATATGTAGTTATTTTTAAAATAAATATATGTA  
AGTATATTTGGATGCTTTAATTAGGAATGTTCTATTTTTTTTTTTTTATTTTTATATTATGGAAGAAAATGGA  
CGTGACGA

GTGTTATTAATAATAATGGCATAAAAACTAGATTTTATTCTATATATATATATATATATATTTCTTCGACTTT  
TTTTTTTTTTTACCCGCACACCCTGAATTTTGTGCTATTTTGAAGCAGAGCGTACTGAACAAATTGGCAGAT  
TTACAAGA

GGACATTATCTCAAGGTACCGCTTACTATGCCTATACATTCTGCAATTTTTTTTTTTTTTTTTTTTGGATAA  
GTATTACTGGGTAATGGGAAGTATAATCACTAGGCATATTATTTTTGACGCAGAGGAGTGGCAGCCTGTCT  
ACTATGTA

TTTGGGCTAAAATCTGCGTCAAACAGGAAATATTGCCTATTTTCGTACAAGGTTACTTCTTAGATGCTATA  
TGTCCCTTTACATAATAAATTAAAAAATTTTTTTTTATAAATTATAATAATTTCTTTTTATTTCTAATAGTA  
TCTTGGGA

TTTGAATCTATAATGTTGTTTTTTTTTTTTTAAAGTATATTTGTATATTATGCATATAAGTCAACGCGTAG  
CGGTGGTATTACGCGCAAGCTTTTGATTTCTTACTATTCTTGGTTGTTTCATTTGTTATTTTTCTTTCC  
TGATATGC

GGGGCCAGTCAGAAGATAAGAAAAAGGAAAATGTTATCATTGTTAAAAACATAAAGTTGTTGAAAATGTA  
TTAACATGTGTATTATATATATAAATTTTACAGTTAAATTTGACTACAACTAAGTAACCCCGAGTCGC  
GAAATAAA

TTTGGATTTTTCTTGTGCTTCAACGGATTATCTTAAAAAATCTATCATATTTCAAATATAAATTTCTTA  
TTTTTACAAAGAAGATATAGATTATGCATAATATTATTTGTTACATTTTTTTTTCTTTTACTTTTTATTTT  
CTTTTCTT

GCAGTTCGAGGTTTTTTTTATTCAAAGTAATAACTTCTTCTTTTCGCTTTTTATGTAGCAGAAAAAAGCC  
GCCGAAGCGCGCGTTCGTGCAATCTCATGATAGAAAAGGGCAACAATGTTGGGCTATTTTAGACAAAG  
AAACTCAG

CTCCCCTTCATTGGCAGAAGAGGGAACCATTTTCATCCAAAAAATAAAAAATAAAAAATCCAAATAT  
TAAGCTAAAAAATACTTAACTGTTTACACAAAGCGTATATAAAATGCATATTAAGAACCTATCTCGTTTC  
AGAGGAAT

CGTCATTGATCAAATAGGTCTATAATATTAATATACATTTATATAATCTACGGTATTTATATCATCAAAAA  
AAAGTAGTTTTTTATTTATTTTATTTTGTTCGTTAATTTTCAATGTCTATGGAAGCCCGTTCGTAAAATTG  
GCGTTTGT
