# Supplementary material for: iNuc-PhysChem: A Sequence-Based Predictor for Identifying Nucleosomes via Physicochemical Properties
Source: PubMed Central journal article supplement (PMC3483203; doi:10.1371/journal.pone.0047843), 2012-10-29
Supplement: pone.0047843.s002.pdf [file pone.0047843.s002.pdf]

**Supporting Information S2.** The original numerical values for the 12 physicochemical properties of dinucleotide, where the physicochemical property “A-philicity” [22] is denoted by P(1); “base stacking” [23] by P(2); “B-DNA twist” [24] by P(3); “bendability” [25] by P(4); “DNA bending stiffness” [26] by P(5); “DNA denaturation” [27] by P(6); “duplex disrupt energy” [28] by P(7); “duplex free energy” [29] by P(8); “propeller twist” [30] by P(9); “protein deformation” [31] by P(10); “protein-DNA twist” [31] by P(11); and “Z-DNA” [32] by P(12). Their values were taken from the papers cited above, respectively.

| Dinucleotide | Physicochemical properties <sup>a</sup> |        |      |       |      |        |      |      |        |       |       |       |
|--------------|-----------------------------------------|--------|------|-------|------|--------|------|------|--------|-------|-------|-------|
|              | P(1)                                    | P(2)   | P(3) | P(4)  | P(5) | P(6)   | P(7) | P(8) | P(9)   | P(10) | P(11) | P(12) |
| AA           | 0.97                                    | -5.37  | 35.5 | -0.27 | 35   | 66.51  | 1.9  | -1.2 | -18.66 | 12.1  | 35.1  | 3.9   |
| AC           | 0.13                                    | -10.51 | 33.1 | -0.21 | 60   | 108.8  | 1.3  | -1.5 | -13.1  | 9.8   | 31.5  | 4.6   |
| AG           | 0.33                                    | -6.78  | 30.6 | -0.08 | 60   | 85.12  | 1.6  | -1.5 | -14.0  | 6.3   | 31.9  | 3.4   |
| AT           | 0.58                                    | -6.57  | 43.2 | -0.28 | 20   | 72.29  | 0.9  | -0.9 | -15.01 | 2.1   | 29.3  | 5.9   |
| CA           | 1.04                                    | -6.57  | 37.7 | -0.01 | 60   | 64.92  | 1.9  | -1.7 | -9.45  | 6.1   | 37.3  | 1.3   |
| CC           | 0.19                                    | -8.26  | 35.3 | -0.03 | 130  | 99.31  | 3.1  | -2.3 | -8.11  | 2.9   | 32.9  | 2.4   |
| CG           | 0.52                                    | -9.69  | 31.3 | -0.03 | 85   | 88.84  | 3.6  | -2.8 | -10.03 | 4.5   | 36.1  | 0.7   |
| CT           | 0.33                                    | -6.78  | 30.6 | -0.18 | 60   | 85.12  | 1.6  | -1.5 | -14    | 1.6   | 31.9  | 3.4   |
| GA           | 0.98                                    | -9.81  | 39.6 | 0.03  | 60   | 80.03  | 1.6  | -1.5 | -13.48 | 2.3   | 36.3  | 3.4   |
| GC           | 0.73                                    | -14.6  | 38.4 | 0.02  | 85   | 135.83 | 3.1  | -2.3 | -11.08 | 4     | 33.6  | 4.0   |
| GG           | 0.19                                    | -8.26  | 35.3 | -0.06 | 130  | 99.31  | 3.1  | -2.3 | -8.11  | 6.1   | 32.9  | 2.4   |
| GT           | 0.13                                    | -10.51 | 33.1 | -0.18 | 60   | 108.8  | 1.3  | -1.5 | -13.1  | 2.1   | 31.5  | 4.6   |
| TA           | 0.73                                    | -3.82  | 31.6 | 0.18  | 20   | 50.11  | 1.5  | -0.9 | -11.85 | 2.3   | 37.8  | 2.5   |
| TC           | 0.98                                    | -9.81  | 39.6 | -0.11 | 60   | 80.03  | 1.6  | -1.5 | -13.48 | 4.5   | 36.3  | 3.4   |
| TG           | 1.04                                    | -6.57  | 37.7 | 0.13  | 60   | 64.92  | 1.9  | -1.7 | -9.45  | 9.8   | 37.3  | 1.3   |
| TT           | 0.97                                    | -5.37  | 35.5 | -0.28 | 35   | 66.51  | 1.9  | -1.2 | -18.66 | 2.8   | 35.1  | 3.9   |
